# Supplementary material for: Ancestral trajectory of infant gut microbiome assembly in non-industrialised populations
Source: Research Square preprint supplement (doi:10.21203/rs.3.rs-6675732/v1), 2025-05-30
Supplement: Supplementary file 1 [file 0c759e201d110fef7fd648f5.xlsx]

## Sheet: Sheet1
Species	Pearson coefficient	p-value	IND:Non-IND ratio	$log_2$ IND:Non-IND ratio	IND/Non-IND category
s__Prevotella sp934191715	2.69024	0	3.73454e-11	-34.6403	Non-IND
s__Veillonella sp022737715	2.55685	0	4.022e-11	-34.5333	Non-IND
s__Collinsella aerofaciens_H	2.32378	0	4.3091e-11	-34.4338	Non-IND
s__Streptococcus sp934229725	2.32843	0	4.43702e-11	-34.3916	Non-IND
s__Prevotella sp022741625	2.21263	0	4.52347e-11	-34.3638	Non-IND
s__Veillonella sp934230905	1.72051	0	5.95688e-11	-33.9667	Non-IND
s__Limosilactobacillus mucosae	1.33722	0	7.8547e-11	-33.5677	Non-IND
s__Holdemanella biformis	1.27209	0	7.99909e-11	-33.5414	Non-IND
s__Prevotella hominis	1.10483	0	9.30518e-11	-33.3232	Non-IND
s__Prevotella sp900313215	0.994001	0	1.0313e-10	-33.1748	Non-IND
s__Megasphaera sp000417505	1.01743	0	1.05099e-10	-33.1475	Non-IND
s__Dialister sp022722495	0.979531	0	1.08009e-10	-33.1081	Non-IND
s__Streptococcus infantarius	0.894017	0	1.17649e-10	-32.9848	Non-IND
s__Veillonella sp900538355	0.851794	0	1.2117e-10	-32.9423	Non-IND
s__Paratractidigestivibacter faecalis	0.733846	8.23467e-221	1.37954e-10	-32.7551	Non-IND
s__Prevotella sp002265625	0.707455	1.4852e-247	1.43075e-10	-32.7025	Non-IND
s__Dialister sp021633965	0.745179	5.74314e-301	1.44708e-10	-32.6861	Non-IND
s__Collinsella sp900556495	0.654626	2.68233e-209	1.538e-10	-32.5982	Non-IND
s__Limisoma sp000437795	0.635818	5.96162e-225	1.65643e-10	-32.4912	Non-IND
s__Succinivibrio sp000431835	0.641983	2.87019e-255	1.67123e-10	-32.4784	Non-IND
s__Collinsella bouchesdurhonensis	0.630897	9.76253e-249	1.75298e-10	-32.4095	Non-IND
s__Campylobacter_D jejuni	0.605296	2.20871e-222	1.84573e-10	-32.3351	Non-IND
s__Ligilactobacillus salivarius	0.621439	5.61405e-243	1.84922e-10	-32.3324	Non-IND
s__Escherichia coli_F	0.572305	2.91905e-127	1.91332e-10	-32.2832	Non-IND
s__Fusobacterium_A mortiferum	0.574429	7.87295e-261	1.93381e-10	-32.2678	Non-IND
s__Mitsuokella multacida	0.545959	3.50514e-200	2.06704e-10	-32.1717	Non-IND
s__Prevotella copri_A	0.505268	3.62295e-121	2.11415e-10	-32.1392	Non-IND
s__Prevotella stercorea	0.495761	9.52327e-173	2.27902e-10	-32.0309	Non-IND
s__Alloprevotella timonensis	0.483172	1.15719e-163	2.35397e-10	-31.9842	Non-IND
s__Prevotella sp900551275	0.46042	2.78531e-139	2.45645e-10	-31.9227	Non-IND
s__Agathobacter sp905209075	0.419335	3.92538e-118	2.48227e-10	-31.9076	Non-IND
s__Phocaeicola plebeius_A	0.408791	5.76329e-77	2.49538e-10	-31.9	Non-IND
s__Enterococcus_B hirae	0.429673	1.25586e-113	2.55486e-10	-31.866	Non-IND
s__Catenibacterium mitsuokai	0.437039	9.17377e-142	2.5634e-10	-31.8612	Non-IND
s__Limosilactobacillus oris	0.422535	1.2901e-89	2.59343e-10	-31.8444	Non-IND
s__Bulleidia sp900539965	0.438817	1.41328e-173	2.69473e-10	-31.7891	Non-IND
s__Faecalibacterium sp905215595	0.408114	2.91822e-175	2.7792e-10	-31.7446	Non-IND
s__Limosilactobacillus vaginalis	0.435525	1.76869e-178	2.82731e-10	-31.7199	Non-IND
s__Veillonella sp900552715	0.397051	1.42951e-157	2.84818e-10	-31.7092	Non-IND
s__Prevotella sp022732315	0.373899	3.47707e-124	2.90536e-10	-31.6806	Non-IND
s__Collinsella aerofaciens_AH	0.399529	1.07324e-143	2.92913e-10	-31.6688	Non-IND
s__Veillonella sp900545205	0.412323	6.24543e-176	2.94958e-10	-31.6588	Non-IND
s__Collinsella sp934655835	0.328253	1.52556e-105	3.08098e-10	-31.5959	Non-IND
s__Prevotella sp958369755	0.367508	2.4199e-98	3.17879e-10	-31.5508	Non-IND
s__Faecalibacterium prausnitzii_A	0.303478	6.05898e-50	3.41272e-10	-31.4484	Non-IND
s__Prevotella copri_C	0.348067	2.02742e-91	3.45318e-10	-31.4314	Non-IND
s__Prevotella sp003447235	0.339907	7.2591e-104	3.45369e-10	-31.4311	Non-IND
s__Prevotella sp900765465	0.351318	2.03387e-116	3.49509e-10	-31.414	Non-IND
s__Prevotella sp934202525	0.341053	6.51035e-116	3.52215e-10	-31.4028	Non-IND
s__Prevotella sp900556795	0.278479	4.13906e-87	3.74854e-10	-31.313	Non-IND
s__Zag111 sp002103105	0.30736	8.39365e-131	3.91427e-10	-31.2505	Non-IND
s__Lactobacillus crispatus	0.330032	4.84647e-121	3.95161e-10	-31.2368	Non-IND
s__Faecalibacterium sp003449675	0.296231	5.20173e-112	4.32348e-10	-31.1071	Non-IND
s__Prevotella sp000436035	0.232574	1.06084e-83	4.51123e-10	-31.0458	Non-IND
s__Campylobacter_D upsaliensis	0.27348	5.51855e-105	4.70026e-10	-30.9865	Non-IND
s__Megasphaera elsdenii	0.249818	1.65152e-44	4.84201e-10	-30.9437	Non-IND
s__Dialister sp000434475	0.260867	5.77188e-71	4.9922e-10	-30.8996	Non-IND
s__Stercorousia sp001765415	0.231427	6.6113e-71	5.36766e-10	-30.795	Non-IND
s__Alloprevotella sp900540885	0.196963	7.37442e-52	5.42535e-10	-30.7796	Non-IND
s__Prevotella copri_J	0.236065	1.95857e-77	5.64763e-10	-30.7216	Non-IND
s__Prevotella sp000434975	0.199598	3.91417e-56	5.82015e-10	-30.6782	Non-IND
s__Agathobacter sp900317585	0.214771	1.06267e-65	6.66847e-10	-30.4819	Non-IND
s__Prevotella sp900544825	0.197961	1.7705e-41	7.58082e-10	-30.2969	Non-IND
s__Collinsella sp934654835	0.127737	4.5053e-31	8.15297e-10	-30.192	Non-IND
s__Prevotella sp900546535	0.186977	1.40937e-48	8.3158e-10	-30.1634	Non-IND
s__Megasphaera sp001546855	0.150532	5.1802e-19	8.86483e-10	-30.0712	Non-IND
s__Prevotella sp900767615	0.136921	3.61142e-32	9.38438e-10	-29.989	Non-IND
s__Parolsenella massiliensis	0.110979	1.47701e-28	9.44517e-10	-29.9797	Non-IND
s__Collinsella sp934654775	0.0886553	1.3747e-18	1.17819e-09	-29.6608	Non-IND
s__Megasphaera massiliensis	0.114091	8.67691e-14	1.68429e-09	-29.1452	Non-IND
s__Anaerostipes sp018918155	0.0686551	1.63607e-15	1.98666e-09	-28.907	Non-IND
s__Megasphaera sp002319965	0.110257	1.35067e-25	2.46302e-09	-28.5969	Non-IND
s__Prevotella sp945863825	0.0504947	6.37177e-09	3.34685e-09	-28.1545	Non-IND
s__Catenibacterium faecis	0.784059	2.73137e-214	0.000465313	-11.0695	Non-IND
s__Bifidobacterium kashiwanohense_A	2.63128	0	0.00241193	-8.69559	Non-IND
s__Ligilactobacillus ruminis	2.43732	0	0.00399174	-7.96877	Non-IND
s__Lactobacillus paragasseri	1.01364	3.4327e-204	0.0041417	-7.91556	Non-IND
s__Klebsiella quasipneumoniae	0.404873	1.01967e-59	0.00417333	-7.90459	Non-IND
s__Campylobacter_D sp934718785	0.0579316	4.83496e-13	0.00593296	-7.39703	Non-IND
s__Parolsenella uli_B	1.1833	0	0.00662097	-7.23874	Non-IND
s__Senegalimassilia sp003474385	1.71413	0	0.00723436	-7.11092	Non-IND
s__Holdemanella sp900556915	1.16233	0	0.0142943	-6.12842	Non-IND
s__Bifidobacterium sp002742445	1.10142	2.98986e-242	0.0162147	-5.94655	Non-IND
s__Blautia_A sp003471165	0.846283	0	0.0217653	-5.52183	Non-IND
s__Ureaplasma sp900544585	0.411999	9.54118e-155	0.0247663	-5.33548	Non-IND
s__Campylobacter infans	0.712478	9.13309e-285	0.0308842	-5.01699	Non-IND
s__Prevotella sp022735715	0.199896	4.81574e-56	0.0336822	-4.89187	Non-IND
s__Brachyspira pilosicoli	0.335488	5.05357e-125	0.0396611	-4.65613	Non-IND
s__Prevotella merdae	0.45729	1.67115e-158	0.0442019	-4.49975	Non-IND
s__Prevotella sp900543975	0.332546	2.0453e-126	0.0452314	-4.46653	Non-IND
s__Campylobacter_D sp900539255	0.131193	2.54426e-32	0.0453026	-4.46426	Non-IND
s__Megasphaera sp900540735	0.0700572	5.72893e-11	0.0545074	-4.19741	Non-IND
s__Veillonella sp018367495	1.65537	0	0.0646044	-3.95222	Non-IND
s__Streptococcus sp934196125	0.0251176	0.00030543	0.0839622	-3.57412	Non-IND
s__Veillonella_A sp000431435	0.856128	5.22355e-125	0.0844891	-3.56509	Non-IND
s__Limosilactobacillus fermentum	0.992657	4.19261e-166	0.0861675	-3.53671	Non-IND
s__Faecalibacterium prausnitzii_E	0.995229	5.17631e-194	0.100935	-3.30851	Non-IND
s__Sarcina ventriculi	0.575061	4.93398e-124	0.101459	-3.30103	Non-IND
s__Haemophilus_D parainfluenzae_K	0.933707	3.05045e-180	0.12211	-3.03375	Non-IND
s__Megamonas funiformis	1.49215	3.89773e-267	0.126234	-2.98582	Non-IND
s__Bifidobacterium infantis	4.76941	0	0.155765	-2.68256	Non-IND
s__Rothia sp902373285	1.46269	4.39086e-210	0.167759	-2.57553	Non-IND
s__Acetatifactor sp003447295	0.550298	2.62165e-89	0.171238	-2.54592	Non-IND
s__Alloprevotella sp900541575	0.0177138	0.0300604	0.175692	-2.50888	Non-IND
s__Ruminococcus_E sp934476515	0.210766	8.53569e-18	0.196001	-2.35107	Non-IND
s__Enterococcus_B faecium	0.776394	4.1178e-90	0.202335	-2.30518	Common
s__Bacteroides hominis	0.663965	7.1e-62	0.204451	-2.29017	Common
s__Streptococcus pasteurianus	0.480719	9.91168e-41	0.208813	-2.25972	Common
s__Veillonella_A seminalis	0.349522	3.31412e-18	0.220153	-2.18342	Common
s__Streptococcus lutetiensis	1.28258	9.28686e-135	0.222614	-2.16739	Common
s__Enterobacter roggenkampii	0.293001	7.87243e-25	0.224277	-2.15665	Common
s__Dorea_A amylophila	1.94335	2.92148e-296	0.279381	-1.83969	Common
s__Bifidobacterium kashiwanohense	0.229858	1.91653e-12	0.28369	-1.81761	Common
s__Streptococcus lactarius	1.92556	5.93524e-183	0.302335	-1.72578	Common
s__Blautia_A sp000436615	0.530482	2.35882e-60	0.306949	-1.70393	Common
s__Sutterella wadsworthensis	1.02959	8.564e-93	0.342178	-1.54718	Common
s__Gemmiger sp900539695	0.582681	5.41655e-51	0.362128	-1.46543	Common
s__Dorea_A sp019421265	0.528245	1.2539e-42	0.36601	-1.45005	Common
s__Dorea formicigenerans	1.67134	4.51435e-212	0.3806	-1.39365	Common
s__Klebsiella pneumoniae	0.924631	3.83615e-52	0.410783	-1.28355	Common
s__Alitiscatomonas sp900066535	1.34378	4.13171e-137	0.415881	-1.26576	Common
s__Blautia_A obeum	1.00055	1.22803e-101	0.424839	-1.23501	Common
s__Enterocloster sp900541315	1.24303	1.45981e-130	0.425518	-1.23271	Common
s__Faecalibacterium sp900539945	0.548696	2.58165e-37	0.438717	-1.18864	Common
s__Faecalibacterium prausnitzii_I	0.294527	4.00151e-17	0.459998	-1.1203	Common
s__Faecalibacterium sp900539885	0.608894	1.52726e-38	0.471269	-1.08538	Common
s__Gemmiger formicilis	1.24769	8.4679e-84	0.485034	-1.04384	Common
s__Streptococcus sp000187445	1.1693	4.15405e-56	0.513387	-0.96188	Common
s__Mediterraneibacter faecis	1.1871	1.268e-70	0.524821	-0.930104	Common
s__Streptococcus salivarius	0.640974	6.54736e-30	0.537037	-0.896906	Common
s__Anaerobutyricum soehngenii	0.514398	7.69986e-29	0.542157	-0.883217	Common
s__Agathobaculum butyriciproducens	1.14624	4.73589e-92	0.555279	-0.848716	Common
s__Acetatifactor intestinalis	0.285436	1.44904e-14	0.565907	-0.821363	Common
s__Enterococcus_D gallinarum	0.289762	7.16926e-12	0.568006	-0.816022	Common
s__Enterococcus_A avium	0.498173	1.48703e-20	0.599954	-0.737077	Common
s__Faecalibacterium duncaniae	0.455477	3.35616e-16	0.625179	-0.677659	Common
s__Klebsiella variicola	0.153056	0.000790551	0.657375	-0.605212	Common
s__Faecalibacillus intestinalis	0.467893	6.19031e-17	0.703125	-0.508147	Common
s__Streptococcus salivarius_D	0.350402	3.64465e-11	0.718474	-0.476992	Common
s__Clostridium butyricum	0.0292194	0.311425	0.732057	-0.449972	Common
s__Faecalibacterium longum	1.14873	2.95025e-39	0.749559	-0.415886	Common
s__CAG-217 sp000436335	0.237579	8.66204e-06	0.758987	-0.397853	Common
s__Bacteroides sp947646015	0.0967395	0.0192535	0.766107	-0.384382	Common
s__Bariatricus comes	0.159568	0.000266298	0.771181	-0.374858	Common
s__Anaerobutyricum hallii	0.384354	7.72965e-11	0.785222	-0.348828	Common
s__Anaeroglobus micronuciformis	0.216063	0.000171758	0.786211	-0.347012	Common
s__Bifidobacterium bifidum	0.939831	5.22656e-16	0.786507	-0.346468	Common
s__Bacteroides thetaiotaomicron	0.381174	2.91843e-07	0.793307	-0.334049	Common
s__Faecalibacterium prausnitzii_J	0.0841861	0.0369738	0.814625	-0.295792	Common
s__Escherichia coli	1.02494	2.76272e-32	0.834229	-0.261485	Common
s__Veillonella hominis	0.233856	0.00504356	0.866929	-0.206015	Common
s__Roseburia inulinivorans	0.215738	0.000854624	0.886982	-0.173023	Common
s__Hominenteromicrobium mulieris	0.0448038	0.222412	0.891422	-0.165819	Common
s__Fimenecus sp000432435	0.0845165	0.107657	0.891845	-0.165134	Common
s__Blautia_A fusiformis	0.186849	0.00492458	0.892758	-0.163659	Common
s__Bacteroides xylanisolvens	0.104676	0.0841089	0.893693	-0.162148	Common
s__Bifidobacterium breve	0.443461	9.31832e-05	0.894634	-0.160631	Common
s__Veillonella parvula_A	0.0608184	0.297457	0.913501	-0.130522	Common
s__Blautia_A wexlerae_C	0.0807712	0.18908	0.92783	-0.108068	Common
s__Ruminococcus_E intestinalis	0.0138959	0.704319	0.948388	-0.0764511	Common
s__Bacteroides sp948436425	0.00690572	0.838843	0.971446	-0.0417941	Common
s__Agathobacter faecis	0.0108953	0.87812	0.994086	-0.00855749	Common
s__Prevotella sp015074785	0.0522223	7.57985e-07	1	0	Common
s__Agathobacter rectalis	-0.084104	0.273802	1.04149	0.0586507	Common
s__Bacteroides ovatus	-0.0960352	0.266728	1.04469	0.0630791	Common
s__Roseburia hominis	-0.0642059	0.2302	1.06278	0.0878426	Common
s__Eubacterium_R sp000436835	-0.0167874	0.632917	1.06795	0.0948409	Common
s__Bacteroides sp900755095	-0.0611633	0.314859	1.07601	0.105686	Common
s__Parabacteroides distasonis	-0.152679	0.0662161	1.07704	0.107066	Common
s__Lachnospira eligens_A	-0.129363	0.0435833	1.10443	0.143298	Common
s__Bacteroides fragilis	-0.272512	0.00401466	1.11374	0.155413	Common
s__Mediterraneibacter lactaris	-0.131413	0.0283482	1.1327	0.17977	Common
s__Roseburia_C amylophila	-0.0720171	0.0898384	1.13575	0.183646	Common
s__Fusicatenibacter saccharivorans	-0.300502	8.36144e-05	1.13896	0.187712	Common
s__Parabacteroides merdae	-0.109856	0.0531169	1.14653	0.197277	Common
s__Bacteroides stercoris	-0.0557102	0.203473	1.15051	0.202273	Common
s__Clostridium sp900540255	-0.209968	0.000383289	1.15226	0.204461	Common
s__Bacteroides caccae	-0.172395	0.0127806	1.15729	0.210745	Common
s__Gallintestinimicrobium propionicum	-0.126797	0.0128068	1.15938	0.213353	Common
s__Bacteroides stercoris_A	-0.0327957	0.339547	1.17886	0.237389	Common
s__Blautia_A faecis	-0.275947	2.65852e-06	1.20321	0.266884	Common
s__Anaerostipes hadrus	-0.701094	2.72015e-19	1.21683	0.283124	Common
s__Phocaeicola vulgatus	-0.516325	4.95946e-08	1.22071	0.287721	Common
s__Actinomyces urogenitalis	-0.0219471	0.52422	1.23819	0.308233	Common
s__Gemmiger qucibialis	-0.18892	0.000513609	1.27508	0.350588	Common
s__Bacteroides uniformis	-0.650288	6.52303e-13	1.29271	0.370395	Common
s__Blautia_A sp900066335	-0.0493927	0.12878	1.2929	0.370609	Common
s__Blautia_A wexlerae	-1.28495	1.36913e-49	1.32086	0.40148	Common
s__Intestinibacter bartlettii	-0.644327	1.31046e-28	1.3307	0.412184	Common
s__Acetatifactor acetigignens	-0.378824	2.21388e-10	1.35209	0.435194	Common
s__Dorea_A longicatena	-0.140153	0.00124077	1.37078	0.455002	Common
s__Veillonella sp900550175	-0.16377	0.000647653	1.37621	0.460697	Common
s__Akkermansia muciniphila	-0.415709	1.12192e-08	1.39663	0.481951	Common
s__Bifidobacterium pseudocatenulatum	-0.781661	2.33011e-14	1.40683	0.492451	Common
s__Alistipes finegoldii	-0.297335	4.94782e-08	1.41512	0.500927	Common
s__Ruminococcus_E bromii_B	-0.745088	1.12758e-19	1.44058	0.526648	Common
s__Veillonella sp902466275	-0.118437	0.00472381	1.44866	0.53472	Common
s__Lachnospira pectinoschiza_A	-0.267325	5.54349e-07	1.50614	0.590857	Common
s__Faecalibacterium prausnitzii_D	-0.743018	1.51113e-22	1.50627	0.590983	Common
s__Flavonifractor plautii	-1.3123	2.40503e-70	1.52263	0.606569	Common
s__Faecalibacterium sp900758465	-0.286296	3.31432e-08	1.63786	0.711813	Common
s__Romboutsia timonensis	-0.766055	2.40357e-43	1.67554	0.744624	Common
s__Alistipes putredinis	-0.423553	1.9923e-14	1.69906	0.764736	Common
s__Hominilimicola fabiformis	-0.871495	1.40238e-45	1.77143	0.824916	Common
s__Faecalimonas sp029983955	-0.289662	2.49741e-09	1.89837	0.924761	Common
s__Lachnospira sp000437735	-0.505998	1.98755e-19	1.92033	0.941358	Common
s__Bifidobacterium longum_D	-0.595527	8.43432e-15	1.93746	0.954163	Common
s__Ruminococcus_B gnavus	-2.74706	1.14433e-204	1.93921	0.95547	Common
s__Phocaeicola dorei	-0.942161	7.93612e-28	2.02831	1.02028	Common
s__Thomasclavelia ramosa	-2.38211	2.05197e-181	2.06584	1.04673	Common
s__Bifidobacterium longum	-3.64566	9.482e-267	2.17973	1.12415	Common
s__Otoolea symbiosa	-0.99159	3.85538e-64	2.38855	1.25613	Common
s__Ruthenibacterium lactatiformans	-1.57032	3.96026e-117	2.51616	1.33122	Common
s__Eggerthella lenta	-2.70338	0	2.59146	1.37377	Common
s__Mediterraneibacter torques	-1.16319	6.03339e-73	2.6252	1.39243	Common
s__Clostridium neonatale	-0.384787	2.36011e-10	2.64631	1.40398	Common
s__Prevotella copri_B	-0.269086	2.56518e-09	2.75074	1.45982	Common
s__Clostridium_AQ innocuum	-2.14316	7.28114e-200	2.75324	1.46113	Common
s__Veillonella atypica	-1.15856	8.3955e-55	2.82856	1.50007	Common
s__Alistipes onderdonkii	-0.809844	8.83782e-40	2.86289	1.51747	Common
s__Dialister invisus	-0.876826	2.59125e-48	3.01715	1.59318	Common
s__Phascolarctobacterium faecium	-0.284336	5.14206e-11	3.02323	1.59609	Common
s__Faecalimonas phoceensis	-1.62072	7.67015e-85	3.04889	1.60829	Common
s__Roseburia sp019411365	-0.587936	3.73029e-31	3.22521	1.68939	Common
s__Enterocloster aldenensis	-1.21631	2.34043e-96	3.38401	1.75873	Common
s__Hominimerdicola aceti	-0.916961	6.13791e-53	3.3936	1.76282	Common
s__Thomasclavelia spiroformis	-0.822084	6.54109e-60	3.47889	1.79863	Common
s__Roseburia intestinalis	-1.24713	3.45015e-78	3.61326	1.8533	Common
s__Hungatella effluvii	-1.42019	7.58183e-103	3.61683	1.85473	Common
s__Enterocloster bolteae	-1.83324	1.2615e-160	3.81945	1.93337	Common
s__Veillonella nakazawae	-1.16574	3.49757e-58	3.82137	1.93409	Common
s__Longicatena caecimuris	-0.422246	2.99297e-25	4.0337	2.01211	Common
s__Enterocloster clostridioformis	-1.01239	1.42421e-68	4.29104	2.10133	Common
s__Akkermansia massiliensis	-0.634905	6.64223e-27	4.33256	2.11522	Common
s__Dysosmobacter welbionis	-0.905768	6.53351e-68	4.38841	2.1337	Common
s__Sellimonas intestinalis	-1.64262	1.60126e-137	4.42181	2.14464	Common
s__DXTB01 sp019410105	-0.71346	1.07277e-49	4.60236	2.20237	Common
s__Prevotella buccae	-0.0962245	0.000466723	4.60461	2.20308	Common
s__Streptococcus thermophilus	-1.7411	1.95458e-127	4.61924	2.20766	Common
s__Lachnospira sp003451515	-0.365254	6.34064e-19	4.70563	2.23439	Common
s__Clostridium_A leptum	-0.712156	2.39297e-58	4.83076	2.27225	Common
s__Streptococcus sp001556435	-1.76061	1.44513e-144	5.26767	2.39717	IND
s__Enterocloster sp001517625	-0.7	1.30474e-49	5.37711	2.42683	IND
s__Bifidobacterium adolescentis	-1.24198	5.6761e-52	5.52038	2.46477	IND
s__Bifidobacterium sp959020145	-0.388436	2.10348e-17	5.98607	2.58161	IND
s__Coprobacillus cateniformis	-1.0566	6.60188e-96	6.18115	2.62787	IND
s__Eisenbergiella tayi	-0.569777	6.64355e-40	6.41085	2.68052	IND
s__Blautia coccoides	-0.357843	1.05539e-23	6.42259	2.68316	IND
s__Enterocloster alcoholdehydrogenati	-1.18528	4.25401e-72	6.52236	2.70539	IND
s__Hominenteromicrobium sp900549945	-0.385073	2.02539e-22	6.54503	2.7104	IND
s__Bifidobacterium catenulatum	-0.603993	1.04864e-24	6.56814	2.71549	IND
s__Bifidobacterium animalis	-0.73866	2.4527e-40	7.00776	2.80895	IND
s__Dialister sp900541485	-0.311444	5.52871e-17	7.04122	2.81583	IND
s__Bifidobacterium sp959020155	-1.43741	2.84576e-65	7.24545	2.85708	IND
s__Blautia_A caecimuris	-0.876021	8.30117e-58	7.9027	2.98235	IND
s__Citrobacter freundii	-0.294427	2.0488e-12	8.27643	3.04901	IND
s__Bacteroides cellulosilyticus	-0.336826	8.18146e-17	8.5615	3.09786	IND
s__Lacticaseibacillus paracasei	-0.501982	7.71269e-22	8.64193	3.11135	IND
s__Eisenbergiella porci	-0.505298	3.83955e-35	9.14406	3.19283	IND
s__Collinsella aerofaciens_G	-0.0484432	0.0569864	9.39516	3.23192	IND
s__Blautia celeris	-0.599415	5.43976e-45	9.49611	3.24734	IND
s__Bifidobacterium dentium	-1.18231	3.28785e-64	10.6876	3.41786	IND
s__Collinsella sp902481895	-0.0356711	0.139644	12.8797	3.68703	IND
s__Anaerostipes caccae	-1.08521	1.41968e-78	17.5972	4.13727	IND
s__Bifidobacterium sp959028125	-0.163411	6.02337e-07	18.8724	4.23821	IND
s__Blautia sp000432195	-0.31416	4.71134e-17	28.1343	4.81426	IND
s__Blautia sp900541955	-0.583384	2.35946e-35	37.1064	5.2136	IND
s__Enterococcus faecalis	-1.26641	4.32408e-78	41.7737	5.38452	IND
s__Phocaeicola massiliensis	-0.152995	2.73543e-07	46.3578	5.53474	IND
s__Anaerostipes hominis	-0.514468	1.13573e-38	54.3901	5.76527	IND
s__Lactobacillus gasseri	-0.105349	1.75698e-05	2.36621e+08	27.818	IND
s__Collinsella aerofaciens_M	-0.0348552	0.149344	3.30577e+08	28.3004	IND
s__Collinsella sp902362275	-0.101799	8.02827e-05	7.43223e+08	29.4692	IND
s__Ruminococcus_E bromii	-0.130995	2.07649e-06	1.09629e+09	30.03	IND
s__Enterobacter hormaechei_B	-0.185497	1.31007e-09	1.26406e+09	30.2354	IND
s__Pauljensenia radingae_A	-0.335158	7.18683e-19	1.84112e+09	30.7779	IND
s__Akkermansia biwaensis	-0.251744	1.42382e-14	1.89097e+09	30.8165	IND
s__Collinsella intestinalis	-0.202223	7.60654e-11	1.93516e+09	30.8498	IND
s__Klebsiella grimontii	-0.327168	2.65263e-21	2.06234e+09	30.9416	IND
s__Enterobacter hoffmannii	-0.270141	7.02531e-17	2.09082e+09	30.9614	IND
s__Veillonella parvula	-0.328311	6.14714e-17	2.48747e+09	31.212	IND
s__Fimivicinus sp900544375	-0.285486	1.2507e-17	2.51974e+09	31.2306	IND
s__Varibaculum cambriense_A	-0.427707	2.34642e-24	3.84256e+09	31.8394	IND
s__Klebsiella michiganensis	-0.443626	4.37875e-22	3.86129e+09	31.8464	IND
s__Bacteroides faecis	-0.500249	3.71663e-25	4.86524e+09	32.1799	IND
s__Klebsiella oxytoca	-0.627711	9.58238e-34	5.73443e+09	32.417	IND
s__Veillonella sp018376995	-0.630429	2.25462e-27	5.92952e+09	32.4653	IND
s__Faecalimonas umbilicata	-0.713396	2.40858e-43	6.94134e+09	32.6926	IND
s__Lacticaseibacillus rhamnosus	-1.03282	3.73661e-58	9.22049e+09	33.1022	IND
