# Supplementary material for: Ancestral trajectory of infant gut microbiome assembly in non-industrialised populations
Source: Research Square preprint supplement (doi:10.21203/rs.3.rs-6675732/v1), 2025-05-30
Supplement: Supplementary file 2 [file 3d23ba89450524932af17ebf.xlsx]

## Sheet: Sheet1
name	category	description
age_adm	age_adm	child age in months
alt_adm	bloods	blood biochemistry results concentration for alt
alk_phosphate_adm	bloods	blood biochemistry results concentration for alk phosphate
i_phosphate_adm	bloods	blood biochemistry results concentration for inorganic phosphate
albumin_adm	bloods	blood biochemistry results concentration for albumin
serum_adm	bloods	blood biochemistry results concentration for serum
bilirubin_adm	bloods	blood biochemistry results concentration for bilirubin
calcium_adm	bloods	blood biochemistry results concentration for calcium
sodium_adm	bloods	blood biochemistry results concentration for sodium
potassium_adm	bloods	blood biochemistry results concentration for potassium
urea_adm	bloods	blood biochemistry results concentration for urea
creatinine_adm	bloods	blood biochemistry results concentration for creatinine
magnesium_adm	bloods	blood biochemistry results concentration for magnesium
haemoglobin_adm	cells	blood test results haemoglobin concentration
edta_adm	cells	edta test results (options: "acceptable", "haemolysed", "insufficient", "clotted", "missing")
basophils_adm	cells	blood test results basophil cell count
rbc_adm	cells	blood test results red blood cell count
neutrophils_adm	cells	blood test results neutrophil cell count
monocytes_adm	cells	blood test results monocyte cell count
wbc_adm	cells	blood test results white blood cell count
platelets_adm	cells	blood test results platelet count
osinophils_adm	cells	blood test results osinophil cell count
lymphocytes_adm	cells	blood test results lymphocyte cell count
delivery_mode_caesarean	csection	child delivery by caesarean section
typical_food_fruits	diet	child eats on a typical day "fruits: oranges, bananas, mangoes, avocados, apples, grapes etc"
food_formula_powder_milk_adm	diet	child received "formula / powder milk" in the first 3 days of life
food_gutthi_gripe_adm	diet	child received "gutthi / gripe water" in the first 3 days of life
typical_food_seafoods	diet	child eats on a typical day "fish and sea foods: fresh or dried fish or shellfish"
food_sugar_water_adm	diet	child received "sugar water" in the first 3 days of life
food_ animal_milk_adm	diet	child received "animal milk" in the first 3 days of life
breast_feeding_adm	diet	child currently breastfeeding?
typical_food_sugars_juices	diet	child eats on a typical day "sugars / honey and commercial juices: sugar in tea, honey, sweetened soda, juices, chocolates, sweets or candies"
food_tea_adm	diet	child received "tea" in the first 3 days of life
typical_food_milkproducts	diet	child eats on a typical day "milk and milk products: fresh/fermented milk, cheese, yogurt, or other milk products"
typical_food_cerealproducts	diet	child eats on a typical day "cereals and cereal products: maize, rice, pasta, porridge, bread, biscuits, millet, sorghum, wheat and any other locally available grains"
typical_food_root_tubers	diet	child eats on a typical day "roots and tubers: potatoes, sweet potatoes, yams, cassava, or foods made from roots or wild roots and tubers"
typical_food_meat_poultry	diet	child eats on a typical day "meats and poultry: camel, beef, lamb, goat, rabbit, wild game, chicken or other birds, liver, kidney, heart or other organ meats or blood-based foods"
typical_food_misc	diet	child eats on a typical day "miscellaneous: spices, unsweetened beverages"
typical_food_vegetables	diet	child eats on a typical day "vegetables: cabbages, carrots, spinach, and any other locally available vegetables including wild vegetables"
typical_food_pulses_seeds	diet	child eats on a typical day "pulses / legumes / nuts and seeds: beans, peas, lentils, nuts, seeds or foods made from these"
typical_food_eggs	diet	child eats on a typical day "eggs: hen or other bird eggs"
food_pure_honey_adm	diet	child received "pure honey" in the first 3 days of life
food_porridge_pulp_adm	diet	child received "porridge / pulp" in the first 3 days of life
typical_food_fats_oils	diet	child eats on a typical day "fats and oils: oil, fats, ghee, margarine or butter added to food or used for cooking"
hivstatus_adm	hiv	hiv known positive (options: "yes, known pcr positive", "yes, antibody positive, unknown pcr status", "yes, known exposed, known pcr negative", no, "known to be hiv exposed, but child untested", "no, child not tested, not known to be exposed")
diag_hiv_related_adm	hiv	child diagnosed with "hiv related illness" infection
muac_adm	malnutrition	child middle-upper arm circumference
whz_adm	malnutrition	child weight-for-height z-score
med_last7days_other_adm	previous_treatment	child received other medication in the last 7 days prior to sample collection
med_last7days_deworming_adm	previous_treatment	child received deworming medication in the last 7 days prior to sample collection
med_last7days_vitamin_adm	previous_treatment	child received vitamin medication in the last 7 days prior to sample collection
med_last7days_yes_unknown_adm	previous_treatment	child received unknown medication in the last 7 days prior to sample collection
admitted_hosp_adm	previous_treatment	child previously admitted to hospital
med_last7days_no_medication_adm	previous_treatment	child received no medication in the last 7 days prior to sample collection
med_last7days_antimalaria_adm	previous_treatment	child received antimalarial medication in the last 7 days prior to sample collection
med_last7days_traditional_adm	previous_treatment	child received traditional medication in the last 7 days prior to sample collection
med_last7days_antibiotic_adm	previous_treatment	child received antibiotic medication in the last 7 days prior to sample collection
collection_day_of_year	season	day of the year (from 1st January) for stool sample collection
sex_adm	sex	child sex
continent	site	continent
site	site	study site
country	site	country
DNA Extracted	technical	Quantity of DNA extracted
Neg Control	technical	The negative control number for this sample
PBS	technical	PBS bottle number
Box No.	technical	Box number in which the sample was shipped and stored
Batch	technical	DNA extraction batch number
Lot No	technical	Lot number of DNA extraction kit
