# Supplementary material for: Ancestral trajectory of infant gut microbiome assembly in non-industrialised populations
Source: Research Square preprint supplement (doi:10.21203/rs.3.rs-6675732/v1), 2025-05-30
Supplement: Supplementary file 3 [file 547655d9c45f990bedd95809.xlsx]

## Sheet: Sheet1
beneficial function	s__Bifidobacterium infantis	s__Escherichia coli	s__Prevotella copri_A	s__Bifidobacterium bifidum	s__Bifidobacterium breve	s__Faecalibacterium longum	s__Bifidobacterium kashiwanohense_A	s__Prevotella sp934191715	s__Bifidobacterium sp002742445	s__Ligilactobacillus ruminis	s__Veillonella_A sp000431435	s__Bifidobacterium longum	s__Megasphaera sp000417505	s__Streptococcus sp934229725	s__Bacteroides fragilis	s__Streptococcus sp000187445	s__Streptococcus lutetiensis	s__Megamonas funiformis	s__Streptococcus infantarius	s__Klebsiella pneumoniae	s__Parolsenella uli_B	s__Streptococcus pasteurianus	s__Bifidobacterium kashiwanohense	s__Anaerostipes hadrus	s__Bifidobacterium pseudocatenulatum	s__Gemmiger formicilis	s__Ruminococcus_B gnavus	s__Agathobacter rectalis	s__Phocaeicola vulgatus	s__Veillonella sp022737715	s__Streptococcus salivarius	s__Dorea_A longicatena_B	s__Prevotella sp002265625	s__Veillonella sp018367495	s__Ruminococcus_E bromii_B	s__Collinsella sp900556495	s__Prevotella sp900544825	s__Lactobacillus paragasseri	s__Prevotella stercorea	s__Agathobacter faecis	s__Limosilactobacillus mucosae	s__Bacteroides uniformis	s__Campylobacter_D jejuni	s__Faecalibacterium prausnitzii_E	s__Blautia_A wexlerae	s__Collinsella aerofaciens_H	s__Bacteroides fragilis_A	s__Streptococcus sp934196125	s__Akkermansia muciniphila
ko:K00826	0.158242	0	0.00279154	0.00169075	0.00517293	0.000604231	5.71687e-06	0.00160611	0	0.0127755	0	0.00435663	0.00504071	0.00219851	0.00336961	0.00200655	3.07953e-05	0	0.000807926	0	0.00570138	0.00239433	0	0.00401967	8.7199e-09	0.00210759	0.000528234	0.000346778	0.00221553	0.00231057	0.0011395	0.00130323	0.00125828	0.00168391	3.68369e-06	0.00288309	0.000443739	0	0.000792739	0.00229406	0	0	0.00124934	0.000302001	0.000934774	0.000233939	0.000917735	0.000736808	1.2691e-05
ko:K01869	0.128756	0.0217521	0.0151325	0.00824406	0.0160132	0.0112715	0.00312741	0.00547426	0.00215248	0.0132157	0.00699921	0.0134263	0	0.00424216	0.00979486	0.00250916	0.00936336	0.0074888	0.00679705	0.00200519	0.000945431	0.00495774	0.000427022	0.00200294	0.000370942	0	0.00359181	0.00287575	0.00336181	0.00388691	0.000459072	7.86307e-05	0.014279	0.00312429	5.41022e-05	0.00516632	0.000714423	0.00219235	0.00117601	0.00102486	0.0029169	9.0093e-06	0.00170565	0.00208693	0.00171058	0	0.00284072	0.00199045	0.000485476
ko:K01653	0	0	0.000781103	0.00263428	0.000544235	0.00292861	0.000551023	0.000455517	0.000170448	0	0.00262666	0	0.00474505	0.00176764	0	0.00187932	0.00226926	1.072e-05	0.00167666	8.98353e-07	0	0.00121518	4.22382e-06	0.00193324	9.00626e-05	0	0.00282144	0.0002858	0	0.000368732	0.000834269	0.00132679	0.000876905	0.00057579	4.56635e-05	0.00100177	0.000125791	0	0	0.000750438	0	5.6121e-05	0.000427927	0.000700674	0.000864534	0	0	0	0.000352427
ko:K09011	0	0	0.0142732	0	0	0	0	0.00693665	0	0	0	0	0	0	0.00461289	0	0	0	0	0	0	0	0	0	0	0	0	0	0.00457048	0	0	0	0	0	0	0	0.00132042	0	0	0	0	1.44937e-05	0	0	0	0	0.000681401	0	0
ko:K01703	0	2.82278e-05	0.00209608	0	0	0.00134189	7.83158e-06	0.00155183	5.21555e-06	0	0.0206387	0	0	0	0.00665495	0.000774953	0.00755391	0.0112689	0.00602859	0	0.0109233	0.00522522	5.10265e-06	0.00493539	4.65951e-05	0.00409497	4.69063e-05	0	0.00526728	0	0	0.000291298	0	0	0	2.43831e-05	0.000136862	0	0	0	0	0.00176961	0.00222359	0	0.00885498	2.78628e-05	0.00335069	0	0.00192474
ko:K00053	0.0644813	0.0148138	0.00603318	0.013072	0.0136933	0.0034871	0.00232395	0.00310081	0.0037489	0	0.00418291	0.00567926	0.00629157	0.00465041	1.33779e-05	0.00430854	0.00397034	0.000266643	0.00297961	0.00492412	0	0.00223048	4.41173e-06	0.000435761	6.79588e-05	0.000754931	0.0016416	2.53085e-05	1.44844e-06	0.000360673	0.00120394	4.34245e-05	0.00239266	0.000143325	2.16015e-05	0.00166652	0.000341079	0	0	3.30322e-05	0	2.41963e-05	0.000702867	0.000567658	0.000972725	0	2.63481e-06	0	0
ko:K01649	0.119542	0.00287448	0.00828911	2.18847e-06	4.16198e-07	0.000266432	0.00241309	0.00707152	0.00385138	0	0.00678272	0.000683754	0.00520636	0.00412393	0.00613947	0.00434855	0.00610061	0.00411361	0.00424447	0.00548543	0.00765903	0.00164377	0.000276108	0.00282046	0.00115818	1.18228e-05	0.00058557	3.53576e-05	0.000745388	0.00610274	0.00161931	0.00237255	0	0.000314065	8.2456e-05	0.00188785	0.000552001	0	0	0.00180871	0	0.000726013	3.16989e-05	6.00183e-06	6.23199e-06	6.32342e-05	0.00171073	0.000474439	4.89557e-05
ko:K01704	0	7.23405e-06	0.00888979	0	0	0.00420657	0.00126565	0.00443085	0.00305534	0	0.0063963	0	0.00299679	0.00214611	0.00265884	0.00218753	0.00191752	0.0029054	0.00157728	0.0026041	0.00284518	0.00111234	0.000484787	0.000393296	0.000253968	3.27008e-05	1.40311e-05	0.000127511	0.000535328	0.00175282	0.00067778	3.71292e-05	0	0.00131002	0.000608073	5.78594e-05	0.000854493	0	0	8.39805e-05	0	0.000122388	0.000701583	0.000218139	0.000235981	0	0.000647111	9.35207e-05	0
ko:K01652	0.00382299	0.0360105	0.000397579	0.00832812	0.000550787	0.000504311	4.69489e-07	0.00393801	9.54682e-06	0	0.00874665	0.000210166	0.0253362	0.0155314	0.00794565	0.0157802	0.00972951	0.00557077	0.00601437	0.0227361	0.00793052	0.00702471	4.71382e-06	0.0028612	1.41211e-05	0.00105236	0.00668307	0.000328348	0	0.00945136	0.00534143	0.00356592	0.0034964	0.00458854	0.00104255	0.00348202	0.000150542	0.00316756	0	0.000200285	0.00251046	4.43466e-05	0.00141164	0.00342879	0.000965736	0	0.00221137	0.000335867	0.000113128
ko:K00052	0.0335655	0.00044652	0.0120404	0.000810935	7.65089e-06	0.0101559	0.000445836	0.00597591	0.000568903	0	0.00428539	2.04329e-06	0.00181291	0.00214324	0	0.00170744	0.00268177	0.00395066	0.00200645	0.000290469	0.00391844	0.00108517	8.59779e-05	0	2.22288e-05	0.000935788	0.00199973	0.000329111	0	0.00247321	0.000435211	0.000955887	0	0.00182775	3.76352e-06	0.00176995	0.00114512	0	0	0.000751817	0	0	0	7.74968e-05	6.44838e-06	0.000627932	0	0.000141786	0.000415045
ko:K01687	0.121104	0.000736682	0.0164937	0.0223622	0.0188966	0.00113215	0.000268977	0.00848041	0.00052795	0	0.00633191	0.00813465	0.00604936	0.00671345	0.00718173	0.00729849	0.00765957	0.00636846	0.00570243	8.47153e-05	0	0.00455645	2.38666e-05	0.00143494	9.19385e-05	0.00393815	0.00386537	0.000104953	9.07975e-05	0.0029147	0.00284011	0.00119909	0.002735	0.00205225	0.00120909	0.00217659	0.00136872	0	0	7.56821e-06	0	0.000526227	0.0013783	0.000700561	0.00143799	0	0.00112651	0	0
ko:K00817	0.00829802	0.00863982	0.00718603	0.0529184	0.00428611	1.95871e-05	0.000752711	0.000144262	0.000139215	0.0134254	0.00383818	0.00176142	0.00421187	0.00221492	0.00364106	0.00319109	0.00238889	0.00206266	0.00404374	0.00100976	0.0029188	0.00147212	3.46159e-07	0.00114117	0.000688712	0	0.0013627	4.32669e-06	0.00176196	0.00280243	0.00103476	0.0002376	0.00133588	0.00165104	0.000771444	0.00217357	0.000729167	0	0.000787042	0.00097857	0.0012961	0.000417973	0.000920271	0.00143212	0.000500357	0	0.00108488	0	3.43203e-05
ko:K00812	0.18713	0	0.0141534	0.0359339	0.0242898	0	0.0185601	0.000370035	0.0196968	0.00573728	0	0.010964	0	0.000925614	0.000692685	0.000650915	0.00354235	0	0.00262248	0.000620984	0.00336257	0.00174754	0.00678293	0	0.00625471	0	0	1.89103e-05	0.00767343	0.00264976	0.000552846	0	0.00285293	0.00204546	0	0.00184327	0.00173629	0	0.00317845	0	0.00191692	0.000554449	0.000930743	0	0	0.00123535	1.4088e-05	0.000919914	0.000464622
ko:K01866	1.82752e-05	0.00235925	0.0135067	0.058733	0.000126606	0.00324848	0.00010061	0.00502941	7.34331e-05	0.00737648	0.00367896	1.3412e-05	0.00418897	0.000142809	4.90905e-05	0.000255774	0.0054747	0.00287861	0.00385487	0.00363043	0.0042111	0.00298921	9.95932e-05	0.00163208	5.50526e-06	0.000122826	0.002845	0	6.58882e-05	0.00320284	3.18203e-06	0.000118152	0.00160927	0.000741882	2.32464e-05	0.00254415	0.000654977	0.000884585	0.00103779	0.000509025	0.00214832	0	0.000835088	6.35285e-06	5.39626e-07	1.1675e-06	6.7941e-06	0.00101492	0
ko:K01867	0.0705522	0.00674344	0.00210817	0.0141941	0.0128702	0.000186712	0.000627837	0.0016149	0.000880178	0.00477441	0.00213384	0.00608353	0.00284433	0.000413166	0.00235733	0.00047783	0.00194961	8.55818e-05	0.0017072	0	0.00325895	0.00134539	8.29163e-06	0	3.26965e-05	0.000235278	0.00209872	0.000220254	1.59962e-05	0.00190183	0.000270271	0.00143659	0.000816634	0.00160135	1.79968e-05	8.90341e-05	0.000494945	0.000454862	0.000302558	0	0.00205025	0.000656421	0.000672643	0.000217895	1.66713e-05	2.62072e-05	0.000750844	0.000702705	4.97922e-07
ko:K01695	0.0022939	0.00369337	0	0.000733682	0	0	0.00684123	0	0.00209356	0.00524634	0.00469394	0	0.00480169	0.00495563	0.00487315	0.00513115	0	0.0053111	0.00238365	0.000234076	0	5.26151e-05	0.000328758	0	0.000208532	0	0.00556014	0	0	0	0.00148314	0	0	0	0.00197381	0	0	0	0	0.00111572	3.24026e-05	9.96772e-05	0.000942738	0	0.000336406	0	0.00120366	0	0.000239232
ko:K06001	0	0	0.0113117	0	0	0.000264142	0	0.00677933	0	0	0	0	0	0	0.00125963	0	0	0	0	0	0	0	0	0	0	0	0	0.000213248	0.000906148	0	0	0	0	0	0.00110094	0	0.00121149	0	0	0	0	0.000402692	0	0	0	0	0.000573269	0	0
ko:K01889	0.0242553	0.008974	0.00804335	0.0180795	0.00539424	1.71058e-06	8.32318e-07	0.00438557	1.59566e-05	0.00420692	0.00272644	0.00216158	0.00121003	0.00146296	1.11447e-06	0.00142999	1.13357e-05	0.00244184	9.29286e-06	2.44124e-05	0.00257544	4.7514e-06	6.80953e-07	0.00143278	9.54647e-06	0	0.000114977	0	0.00150412	0.00190396	0.000436381	6.53472e-06	0.00126842	0.000804877	0.00029081	0.00296579	0.000831393	0.000808421	0.000636313	0.000850339	0.00120622	0.00024866	0.000601859	1.14259e-07	3.36055e-06	0.000306888	0.000133661	5.53512e-06	0
ko:K04518	0.000576812	0	0.00782688	6.04438e-06	0.00848903	0.010911	0.000763354	0.00104623	0.00457554	0.00547312	0.00282964	1.7838e-06	0.00362911	0.00279353	0	0.0030139	0.00197909	0.00307808	0.00117791	0	0.00299325	0.0017734	0.000473387	0.00138854	0.000764023	2.84942e-06	0.00010422	0.00106832	0.00158289	0.00206946	0.000564877	0.00106248	0	0.00160626	0	0.00128168	0.00055521	0	0	0.000972621	0	0.000447718	0	5.28194e-05	0.000682812	0	0	0.000653867	0
ko:K01890	0.000700596	0.000740697	0.000312941	0.0566456	1.42203e-05	0.000593468	0.00529787	0.000281655	0.00351023	0.012503	0.00823333	1.80873e-05	0.00876179	0.00616956	0.0109656	0.00673434	0.00806412	0.00840802	0.00585391	0.0148466	0.00849936	0.00429208	0.00126266	0.00380608	0.0013073	6.13095e-05	0.00422075	0	2.89243e-06	0.00586266	0.000445118	0.003039	9.09144e-05	3.95198e-05	0.00265205	0.00680126	3.66825e-06	0.00232408	5.74891e-06	0.000793357	0.00331772	0.000281531	0.00167101	0	0	0.00162636	0.00357069	0.00181223	2.71882e-05
ko:K04516	0	0	0	0	0	0	0	0	0	9.00181e-05	0	0	0.0251522	0.0182065	0.00143918	0.0222811	0.0191433	0	0.0174579	0	0.0044047	0.0122048	0	0	0	0	0	0	0	0	0.000264912	0	0.0142117	0	0	0	0	0	0.00804209	0	0.00737891	0	0	0	0	0	0.000937289	0.00665133	0
ko:K01817	1.86316e-06	0	0.0155101	5.84165e-05	0.00468405	0	0.00411272	0.00763522	0.00427049	0.0078834	0.00499717	0.00457177	0.00392248	0.00276447	0.00536761	0.0029183	0.00408557	0	0.00560802	0	0	0	0.00136856	1.98317e-05	2.13391e-07	0	0.00253081	0.000615242	0.00035527	0	0.000560735	0	0	0	0.0011605	0	0.00138026	0	0	0.00203641	0.000532719	0.000205948	0.000950223	0	0.00104836	0	0.00103515	0	7.23659e-06
ko:K00766	0.0652424	0	0.00336558	5.24137e-05	3.49988e-06	0	0.00219093	0.00215451	0.00104237	0.00293517	0.00374264	1.01729e-05	0.00757262	0.00342076	0.000215587	0.00342921	0	0.00433679	0.00228121	9.48973e-07	0	0	9.35994e-05	2.23387e-07	0.000201959	0	0	0	0	0.00214373	0.00108519	0	0	0.0017508	0.000164614	0	0.000214665	0	0	0	3.08838e-05	2.81614e-05	0.000785152	0	0.000488327	0	0.000779824	0	0
ko:K01658	0.037015	0.00695037	0.00547305	9.56078e-06	0.00470943	0	0.00311193	0.000790644	0.00235943	0.00126882	0.00385608	0.00207048	0.00193652	0.00191456	0.000707692	0.0019503	0	0.00203719	0.00106236	0.000869583	0	0	0.000430936	0.000869387	0.0010957	0	0	0.000547236	0	0.000998089	0.000602824	1.32908e-05	0.000579972	0.000831027	0.000189491	0	0.000289363	0	0.00038906	0.000425995	1.16815e-05	0.000229219	0	0	0.00053108	0	0.000518051	0	0
ko:K01657	0.141711	0.0048453	0.0049244	0.0247218	0.000149599	0	0.00951655	0.000594156	0.00946928	0.00237625	0.00679374	0.00331804	0.00143461	0.00539603	2.33797e-05	0.00548827	0	0.00799986	0.00515075	0.000220988	0	0	0.0050534	0.00794293	0.00341853	0	0.00436576	0.00219071	0.00045842	0.00432728	0.00151076	5.31038e-05	0	0.00311663	0.00251589	0	0.000214167	0	0	7.0263e-05	5.02703e-05	7.31502e-05	0.00154015	0	0.00199973	0	4.60574e-05	0	0.00027138
ko:K01609	0	0	0.00570875	0	0	0	0	0.00359781	0	0.00261878	0	0	0.00243989	0.00307169	0.00273248	0.00273169	0.00274968	0.00376371	0.00144352	0	0	0	0	0.000910761	0	0	0.0018298	0.000185379	0.00130506	0.00217346	0.00100116	0	0	0.000700775	0.000735723	0	0.000436329	0	0	0	2.02955e-05	0.000162586	0.000622488	0	0.00089201	0	0.000886661	0	8.64639e-05
ko:K13497	0	0	0.00494396	0	0	0	0	0.00316492	0	0.0043117	0	0	0	0.00502502	0.000316692	0.00503743	0	0	0.00335105	1.39402e-06	0	0	0	3.2815e-07	0	0	0	0	0	0	0.00159412	0	0	0	0.000241815	0	0.000315338	0	0	0	4.53676e-05	4.13685e-05	0.00115337	0	0.000717341	0	0.00114554	0	1.65504e-05
ko:K00657	0	0.000114955	0.00468715	0	0	0	0	0.00249188	0	0.00075176	0	0	0	0	0.00168628	0	0	0	0	0	0	0	0	0.000144252	0	7.35828e-06	0.000544399	5.16316e-05	3.95392e-05	0	0	0	0.000748818	0	0	0	0.000385962	0.000429641	0.000475887	1.90082e-05	0	0	0	0	0	0	0.000529844	0	0
ko:K00949	0.00551395	0	0	0	0.0104652	0.000392334	0.00366522	0	0.00410972	0.00322734	0.00166461	0.000210217	0	0.00269639	0.00240443	0.00267102	0.00166622	0.00123822	0.00140299	0	0.00210426	0.00107429	0.00116421	0	0.00107284	5.83514e-06	0.00131208	0.000758943	0.000895227	0	0.000873252	0.000729775	0	0	0.00056676	0.00203439	0	0.000564676	0.000272747	0.000671714	0.000800594	0.000139165	0	0.000817855	0.000651793	0.000579826	0.000531713	0.000518532	0
ko:K06949	0	0.000268151	0.00941318	0	0	0	0	0.00550352	0	0.00444423	0.00258226	0	0.000149945	0.00387828	0.00146926	0.00362103	0.00234356	0	0.00197194	0.000207318	0.00359555	0.00140609	0	2.05905e-05	0	0.000189583	0.00161874	0	0	0.00127755	0.00125142	0.00109122	0.000276525	0.00115339	0.00092995	0.0017316	0.0010958	0.000744574	0.00022941	0.00074369	0.00115125	0.000222026	0	1.0039e-06	0.00100897	0.000456365	0.000227859	0.000760168	0.0007115
ko:K00793	0.03606	0.000833392	0.00561002	0.000273856	0	0.00339537	0	0.00301421	0	0	0.00155581	0.000845068	3.16116e-06	0	0.000896686	0	0.00107333	0.000267517	0.000915482	0.0003341	0	0.000839541	0	0	0	0	1.29301e-05	0.000614631	0.000116657	0.000772973	0	2.42275e-05	9.98486e-05	0.000632131	0	0	0.000474404	0	5.74026e-05	0.000472643	0	0.00086988	0.000339305	0.000222288	0.000407721	0	9.44849e-05	0	0.000335281
ko:K11753	0.0499244	0.000530428	0.000204998	0.0206082	0.00225684	0.000938963	0.00432903	0.000419167	0.00468583	0.00388909	0.00195029	0.00418536	0.00170683	0.00227462	0.00326582	0.0023608	0.00177682	0.00318225	0.00148326	0.00127926	0.00513684	0.00123894	0.00108694	0.0013279	0.0015416	0.000140744	3.10467e-05	0	0.00139668	0.00160669	0.000703696	0.000996543	0.00162857	0.000598515	0.00116405	0.00117353	4.01621e-05	0.00074031	0.000479631	0.000870377	0	0.000494447	0.000631685	0	0.000832088	0.00131906	0.000897368	0.000610776	0.00023641
ko:K09680	0	0	0.000228184	0	0	0	0	0.0102334	0	0	0	0	0	0	0	0	0	0	0	0	0	0	0	0	0	0	0	0	0.00142506	0	0	0	0	0	0	0	2.34894e-05	0	0.00091296	0	0	0	0	0	0	0	0	0	0
ko:K00868	0.0412479	0.00709432	0.00557107	0.00800831	0.00603713	2.27073e-05	0.0013813	0.00102137	0.00207204	0	0.00243919	0.00226352	0.00237088	0.00335333	0.00243338	0.00598933	0.00333428	0.00285443	0.0030327	0.00122498	0.00304708	0.00209119	0.000490455	0.00175242	0.00111457	0.000441357	0.00178394	0.00115252	0.00140575	0.00126218	0.00156357	0.0016167	0	0.000819932	8.52696e-07	0.00121303	0.000370412	0.00030903	0	0.000916869	0.000815421	6.76834e-05	0	1.05458e-06	0.000658052	0	0.000846039	0.00107931	0
ko:K03524	0.0465325	0.000218236	0.0110748	0.00813808	0.0139764	0.000713136	0.0051613	0.00254785	0.00407743	0.00833489	0.00242011	0.00158768	0.00285109	0.00194555	0.00232958	0.0019869	0.0017305	0	0.00142921	0.00240512	0.002773	0.00101866	0.000191168	0.00174039	2.63472e-05	5.40934e-05	0.00191017	0.00100648	0.00120461	0.00104717	0.000932418	0.0011408	0.0017347	0.00114829	0.000893024	0.0012	0.000929428	0.00012821	0.000700223	0.00110253	0.00114348	0	0.000605403	0.00188146	0.00213016	0.00102502	0.000710077	0.00051265	8.73478e-05
ko:K00287	0	0.00904105	0.0061398	0.0152454	0	0	0.00139128	0.000680918	0.0020918	0.00293177	0.00217241	0	4.96267e-07	0.00220775	0.00177555	0.00224071	0.00135042	0	0.00105465	0	0.00204842	0.000777945	0.000546989	0.00138755	0.00153415	0	0.00119109	0.00108489	0.000937771	0.00128159	0.000683821	0.000440148	0.00104143	0.000870928	0	0.000856758	0.000493892	0.000325804	0	5.61509e-06	0.00113104	0.000404491	0	0	0.000509388	0.000194701	0.000356768	0.000416127	2.4113e-05
ko:K00941	0	0.00446115	0.00894419	0.000107486	0	0.000644483	0.00160697	0.0126371	1.81091e-06	0	0.00343703	0	0.00501977	0.000164151	0.0154107	0.00137577	0	0.00490451	0.00125638	0	0.00586623	0.000859797	0.000385801	5.79029e-05	7.80684e-07	0.00127812	0.00238327	5.03814e-05	0.00162878	0.00181199	0	0.00167336	0.00351994	0.00162007	0.000832382	0.00374654	0.000913077	0.00118997	4.02294e-05	0	0.00126248	0.00146578	0.000715596	0.000632947	0.00093201	0.000277346	0.00364908	0	1.22e-05
ko:K00946	0	0.00250266	0.0105793	0	0	0	0	0.00484287	0	0	0.00291113	0	0.00299476	0	0.0031646	0	0	0	0	0.00290782	0	0	0	0	0	0	0	0	0.00134036	0.00144565	0	0	0.00062137	0.000678522	0	0	0.00102383	0	0.000584519	0	0	0.000496473	0.000689306	0	0	0	0.000745832	0	4.7897e-06
ko:K01662	0.0166428	0.0263019	0.0258177	0.0702739	0.0242223	0.00663259	0.0124189	0.0408579	0.0107636	0.00708983	0.000122058	0.0178013	0	0	0.0132412	0	0.00306709	0.0034399	0.00238296	9.0054e-07	0.00654217	0.00325004	0.00379613	0.00477459	0.00107032	3.37139e-05	0.00203285	0.00188313	0.00563873	0.0057361	0	0.00265069	0.00340548	0.00254005	0.00185727	0.00293169	0.00271132	0.00163458	0.00180545	0.00074515	0.00195456	0.00101566	0.00134349	0.000728041	0.000691462	0	0.00219098	0.00115442	0.000681589
ko:K00939	0.00740969	0.00164075	0.00842886	0.000176692	0.00245931	0.000916491	0.000326319	0.00379345	0.000546733	0.00410157	0.00173213	0.000635167	0.00211802	0.000759291	0.00167624	0.00116153	0.00213862	0.00233328	0.00162391	0.000263293	0.00205342	0.000863294	0.000153819	3.08509e-05	0.00012577	3.47171e-05	0	0.0012511	0.000636691	3.53503e-05	0.000561099	0	0.000378297	5.59557e-05	0.000730693	0.00135367	0.000760068	0.000593106	0.000270063	0.000682606	0	0.000990726	0.000322687	0.000181691	1.6724e-05	1.12927e-05	0.000398577	0.000546336	3.65287e-05
ko:K11752	0.057924	0.0127959	0.0144401	0.000433659	0	0.00685345	0.00292889	0.00428494	0.00521581	0	0.00246433	0.00136957	0.00227986	0	0.0031131	0	0.00201544	0.00243445	0.00171793	0.00120327	0	0.00127428	0	0	0.00154682	0	2.07895e-05	0.000872633	0.00142259	0.0014005	0	7.39368e-05	0.00246335	0.000926527	0	0	0.000979284	0	0.000963663	0.000875372	0	0.000347218	0.000763045	0.000353364	0.000729127	0	0.000826814	0	0.000599137
ko:K14652	0.0626103	0.00690653	0.0136959	0.000480441	0	0.00134992	0	0.00644433	0	0	0.00278509	0.00146472	0.000112717	0	0.00338072	0	0.00210812	0.00255263	0.00183026	0.000117869	0	0.00135937	0	0.000799879	0	0	7.08857e-06	0.000497017	0.00217332	0.00192175	0	0.000430925	1.71981e-05	3.79033e-05	0	0	0.00127696	0	0.000622663	0.000468904	0.000936896	0.000816297	0.000601314	8.09374e-05	0.00151408	0	0.000950327	0	0
ko:K19286	0	0	0.0076413	0	0	0	0	0.000221095	0	0	0	0	0	0	0.000288207	0	0	0	0	0	0	0	0	0	0	0	0	0	0.00092302	0	0	0	0.000844346	0	0	0	0.000648397	0	0.000544303	0	0	0.000449715	0	0	0	0	0.00065217	0	0
ko:K01515	0	5.17631e-05	0	0.000117418	0.00706564	0	0	0	0	0.00461135	0.00190179	0.0021074	0	0.0026631	0.00163312	0.00267674	0.00233784	0	0.00263741	0.00430677	0.00515128	0.00261534	0	0.00273819	0	0.000118477	0.00142344	0.00107137	0	0.00105753	5.0557e-06	0.000778341	0	0.000728924	0.000403963	0.00134046	0	0.000873514	0	5.55786e-05	0.000869895	0.000470102	0	0	3.79427e-05	0	0.000680304	0.00102102	0.000213742
ko:K00794	0.0312416	7.70601e-07	0.00124833	0.000235952	0	0	0	0.000852082	0	0	0.00128414	0.000732516	0.00116419	0	1.53528e-07	0	0.000913587	0.00107386	0.00074651	6.14525e-08	0	0.000567911	0	0	0	0	0	0.000449867	0.000857418	0.000348236	0	9.89122e-05	0.000491501	0.000285615	0	0	3.14823e-05	0	0.00041653	0.000211848	0	0.0006488	0.000363859	0	2.81111e-06	0	2.72938e-08	0	0
ko:K19285	0	0.000547651	0.00832161	0	0	0	0	0.000240779	0	0.00542197	0	0	0	0.00165879	0.000313866	0.00141556	0	0	0	0.000912212	0	0	0	0	0	0.0010125	0	0	0.0010052	0	0.000455314	0	0.000919518	0	0	0	0.000706124	0	0.000592762	0	0.000866488	0.000489753	0	0	0	0	0.000693198	0	0
ko:K06215	0.000668659	0	7.26634e-06	0.00173683	0.000400978	0	2.62434e-05	2.55057e-06	5.05585e-05	8.33357e-05	0	0.000184804	0	7.04219e-05	0	9.11559e-05	0	0.0184769	0.0164025	0	0	0	0	0.000311966	0	0	0.0145224	2.95544e-06	0	0	0.00146531	0.00867152	0.00546973	0	0	0	3.36355e-07	0	0.000607063	0	0	0	0	0	8.02353e-05	0.000960882	0	0	0
ko:K08681	0.00296845	0	0.00404193	0.00249255	0	0	0.00544553	0.00241525	0.00546682	0	0	0.000676657	0	8.78817e-06	0	2.54913e-05	0.00083097	0.00248422	0.00129141	0	0	0	0.002283	0.000626689	0.000246406	0	0.00174356	0.000510592	0	0	6.55459e-05	0.000555481	0.000676026	0	0	0	0.00013443	0	0.000401534	0.000699407	0	0	0	0	4.96694e-06	0.000477522	0	0	0
ko:K01733	0.011209	0	0	0.00085681	0.00569817	0.000365819	0.00757562	0	0.0081617	0.0136965	0.00752122	0.000563337	0.00489925	0.00484931	0.00369089	0.00456392	0.00870533	0.0104536	0.00613987	0.000271785	0.00703154	0.00406217	0.00215196	0.00147148	0.000739072	7.25404e-06	0.00397449	8.54804e-05	0.00360935	0.00582892	0.00130561	0.00063918	0.00224967	0.000715997	0.00151106	0.00337682	0	0.00155839	0	0	0.00198053	8.42681e-05	0.00141388	0.000405842	0.000235519	5.91163e-07	0.000306397	0.00188038	0
ko:K00097	0	0.0147853	0.00015112	0	0	0.00482252	0	0.00466531	0	0	0	0	0	0	0.000144743	0	0	0	0	0.00595143	0	0	0	0.000330137	0	0.00175506	1.29093e-06	1.23285e-05	0.00103816	0	0	0.00339519	0.00170627	0	0	0	0.000384543	0	0.00170141	5.75031e-06	0	4.64907e-06	0.00131028	0	4.83622e-05	0	0.000215011	0	0
ko:K00831	0.00370637	8.2349e-06	0.00266014	0.0183876	0.0477494	0.00105973	0	0.0016098	0.00938637	0.0082621	0	8.99975e-05	0	0.00521542	0.000472712	0.00547554	0.00157456	0.00485081	0.00159103	0.000205007	0.00419458	0.000923626	0	1.08659e-06	0	3.2986e-05	0.00168817	0.000139671	0.00117794	0	0.00213762	0.00151842	0.00140911	0	0.00149268	0.00165302	0.000368818	0	0.00100774	0.00123309	0.00133874	2.75925e-05	0.000948015	0	0.000231484	0	0.000147802	0.000851529	0
ko:K01665	0.13535	0.000253797	0.00412064	0.0115274	0	0	0	0.00589653	0	0	0.00369831	0.00313951	0.00054136	0.00254259	0.002183	0.00268067	0.00019702	0	0.00174634	0.00166374	0	0.00101504	0	0.00161934	0	0	0	0	0.00220573	0	0.000787688	2.54125e-05	0.00123421	0	0	0	7.98781e-05	0	1.63651e-05	0	0	5.09291e-05	0	0	0	0	0.00066731	0	3.91442e-05
ko:K01737	0	0.000135981	0	0	0	0	0	0	0	0	0.0013757	0	0.00128115	0.000721285	0.000639846	0.000583328	0.000864398	0.000848133	9.61834e-05	2.18973e-05	0.00163994	0.000521533	0	1.23726e-07	0	0	0	0	0.000681196	0.000727628	0.000329224	0.00044705	0.000522721	5.58106e-05	0	0	0	0	0	0	0	2.18234e-05	0.00033076	0	1.91637e-05	0	0.000338928	0.000276097	0
ko:K06920	0.0269983	0.00701685	0.00144945	0	0	0	0	0.00025531	0	0	0.00213233	0	0.00269559	0.00204395	0.00226033	0.00219275	0.00156269	0.00135804	5.51684e-05	1.78477e-05	0	0.000495653	0	0.00100916	0	0	0	0	0.000263088	0.00118571	0.000680845	0	0.00249189	0.000670107	0	0	9.52145e-05	0	0.000673178	0	0	1.33269e-05	0.000517793	0	0	0	0.000581414	1.09602e-05	0.000163115
ko:K00796	3.01283e-05	0.0122918	0.0107638	0.0143096	0.00133756	0	0.00363946	0.0055944	0.00415143	0	0.00290498	1.026e-06	0.00369347	0.00314484	0.00378833	0.00313186	0.00183094	0.00175258	0.0014461	0	0	0.00103274	0.00141737	1.5096e-06	0.00145659	0	0	0	0	0.00219186	0.00103095	0.000966816	0.00183603	0.000711875	0	0	0.000956297	0	0.00109251	0.000231728	0.00121767	5.02485e-05	0.000666555	0	0.000641607	0	0.00120935	0.000596948	1.36581e-05
ko:K01664	0.0384092	0.00721216	0.0056792	9.9209e-06	0.00488682	0	0.00322914	0.000820425	0.0024483	0	0	0.00214847	0	0	0.000734349	0	0	0	0	0.000902337	0	0	0.000447168	0.000902134	0.00113698	0	0	0	0	0	0	1.37914e-05	0.000601818	2.45283e-05	0	0	0.000300262	0	0.000403715	0	0	0.000237853	0.000282745	0	0	0	0.000537565	0	0
ko:K01113	0	0	0	0	0	0	0	0.00708892	0	0	0	0	0	0	0.00347708	0	0	0	0	0	0	0	0	0	0	0	0	0	0	0	0	0	0	0	0	0	0	0	0	0	0	0	0	0	0	7.25865e-05	0.000949128	0	0
ko:K01495	2.64223e-07	0.00588998	0	0.0150288	1.06269e-07	0	0	0	0	0	0.00273796	2.21446e-07	0.00290051	0.00222752	0	0.00225632	0.00263741	0	0.0016657	0.000205774	0.00348755	0.00123492	0	1.4377e-05	0	0	0	0	0.000123259	0.0033491	0.000718486	0.000642729	0	0.00115231	0	0.00143378	0	0	0	0.000289701	0.0011417	0.000249131	0.000655483	0	0.000385383	0	0	0.000555817	0
ko:K09457	0	0.00993551	8.71693e-05	0	0	0	0	0	0	0	0.000599524	0	4.55117e-05	0.00132352	8.28372e-05	0.00150058	0.00167392	0.00294227	0	0.000415705	0	0	0	0.000157703	0	0	0	0	0.000204536	0.00137057	9.63698e-05	0	0	0.00116152	0	0	1.15081e-06	0	0	0	0	0	0.000688573	0	0	0	0.000137473	0	0.000458937
ko:K11754	3.50422e-07	0.000665513	0.00688162	0.00070596	0.0667557	0.000148339	2.00331e-07	0.00906914	3.8846e-07	0.00708665	0.00447025	1.29923e-06	0.0054361	0.00996489	0.0041225	0.0103073	0.00636595	0.00390182	0.00487537	0.000501781	0.00515591	0.0036387	5.91959e-08	0.00527874	5.61311e-07	1.35884e-05	5.8131e-05	0.00180716	0.00179774	0.00289489	0.00350375	0.00446282	0.00178024	0.00178667	0.000277218	0.0022319	0.00086918	0.00115365	0.00118837	0.00150733	0.00367816	2.02311e-05	0.0010279	0.000589362	0.00214062	0.000963456	0.00111845	0.00192	0.000357259
ko:K00343	0	0.00106512	0.0145291	0	0	0	0	0.00767655	0	0	0	0	0	0	0.00488948	0	0	0	0	2.3428e-05	0	0	0	0	0	0	0	0	0.000151201	0	0	0	0.00142836	0	0	0	0.000610071	0	0.00110256	0	0	6.74335e-06	0.00117768	0	0	0	0.0015224	0	0
ko:K00342	0	0	0.0141207	0	0	0	0	0.00630815	0	0	0	0	0	0	0.0048398	0	0	0	0	0	0	0	0	0	0	0	0	0	0.0044395	0	0	0	0.00237538	0	0	0	0.00174025	0	0.000781075	0	0	3.26156e-05	0.00126256	0	0	0	0.00102811	0	1.9039e-07
ko:K00338	0	0	4.21765e-06	0	0	0	0	9.74263e-05	0	0	0	0	0	0	0	0	0	0	0	0	0	0	0	0	0	0	0	0	0.00102409	0	0	0	0	0	0	0	0	0	0	0	0	8.48011e-05	0.000244176	0	0	6.06777e-07	0	0	0
ko:K13378	0	9.50467e-07	0.00059269	0	0	0	0	0.000268482	0	0	0	0	0	0	0.0188292	0	0	0	0	0	0	0	0	0	0	0	0	0	0.0081213	0	0	0	0	0	0	0	1.20171e-05	0	0	0	0	0.000707195	0	0	0	0	0.00552021	0	0
ko:K00341	0	5.96684e-05	0.0225726	0	0	0	0	0.00975204	0	0	0	0	0	0	0.00168571	0	0	0	0	0.00325819	0	0	0	0	0	0	0	0	7.57034e-05	0	0	0	8.4573e-06	0	0	0	0.00184979	0	0.000362196	0	0	1.42954e-05	0.00172129	0	0	0	0.000258478	0	7.23732e-05
ko:K00331	0	5.60181e-08	0.00826082	0	0	0	0	0.00399646	0	0	0	0	0	0	0.00066076	0	0	0	0	0	0	0	0	0	0	0	0	0	0.0001037	0	0	0	2.99648e-06	0	0	0	0.000810584	0	2.62323e-06	0	0	0	0.000462149	0	0	0	0.000212645	0	1.90775e-05
ko:K00337	0	0.00019593	0.000225639	0	0	0	0	0.000168638	0	0	0	0	0	0	0.0035693	0	0	0	0	0.00372562	0	0	0	0	0	0	0	0	0.00205486	0	0	0	0.00178633	0	0	0	0.000133132	0	0.000221236	0	0	0.00342389	0.0017547	0	0	0	0.00235089	0	0.00152428
ko:K00333	0	0	0.000679656	0	0	0	0	0.000307877	0	0	0	0	0	0	0.021592	0	0	0	0	0	0	0	0	0	0	0	0	0	0.00931293	0	0	0	0	0	0	0	1.37804e-05	0	0	0	0	0.000810962	0.00367407	0	0	0	0.00633018	0	0
ko:K00340	0	0.00248792	0.00328229	0	0	0	0	0.00154923	0	0	0	0	0	0	9.34122e-05	0	0	0	0	0.000380607	0	0	0	0	0	0	0	0	0.000538604	0	0	0	0.000297924	0	0	0	0.000272729	0	0.000107996	0	0	5.2395e-05	0.00017547	0	0	0	0.00010681	0	0
ko:K00339	0	0	0.00547287	0	0	0	0	0.00259454	0	0	0	0	0	0	0.00155875	0	0	0	0	0.000139004	0	0	0	0	0	0	0	0	0.000708263	0	0	0	0.000360624	0	0	0	0.000507849	0	0.000623338	0	0	0.000150871	0.000367885	0	0	0	0.000592577	0	7.34012e-07
ko:K00330	0	0.00339564	0	0	0	0	0	0	0	0	0	0	0	0	0.000135083	0	0	0	0	2.26594e-05	0	0	0	0	0	0	0	0	0	0	0	0	0	0	0	0	0	0	0	0	0	8.64279e-05	0	0	0	0	0.000294178	0	2.78821e-05
ko:K01911	0	0.0191333	0.00526077	0	0	0	0	0.00864178	0	0	0.0097724	0	0	0	0.00850515	0	0	0	0	0.00484149	0	0	0	0.000170996	0	0	0.000785407	0	0	0.00553186	0	0.000221497	0	0.00241946	0	0	6.10739e-05	0	0.00253442	0	0	6.56052e-05	0	0	0	0	0.00255556	0	0.000110955
ko:K02548	0.0264094	0.00253169	0.00517258	0.0131699	0.0195667	0	0.00381186	0.00538261	0.000981978	0	0.00299814	0.000688846	0.00355156	0	0.00311803	0	0	0	0	0.00165243	0	0	0.00148743	0	4.0788e-05	0	0	0	0.000881324	0.00233457	0	0	0.00124254	0.000311812	0	0.00154832	4.59003e-05	0.00171849	0.000553221	0	0.000103568	8.13103e-05	0	0	0	2.90725e-06	0.000848985	0	0
ko:K02552	0	0.000694517	0.0303302	0	0	0	0	0.000708784	0	0	0.00764489	0	0	0	0.00750899	0	0	0	0	0.00313239	0	0	0	0.000128139	0	0	0.000678649	0	0.0040188	0.00409045	0	0	0.00371671	0.00318986	0	0	0.00303417	0	0.0023587	0	0	0	0	0	0	0	0.00234254	0	3.67432e-05
ko:K03183	0	0.00903264	0.00399699	0	0	0	0	0.00252731	0	0	0.00184548	0	0.00249352	0	0.00270583	0	0	0	0	0.00120606	0.000983717	0	0	0	0	0	0.0010213	8.78843e-06	0.000722349	0.00111226	0	0	0.00079924	0.000406664	0	0.0012119	0.000305941	0.000695556	0.000695215	0	0	4.91246e-05	0.000522046	0	0	0	0.00084256	0	0.000467208
ko:K19222	0	0	0.00540016	0	0	0	0	0.00234658	0	0	0.0016948	0	0	0	0.00231001	0	0	0	0	0.000504622	0	0	0	3.52988e-05	0	0	0.000161284	0	0.000922702	0.00102127	0	0	0.00119112	0	0	0	0.000322741	0	0.000518111	0	0	4.61678e-05	0	0	0	0	0.000675346	0	0
ko:K02361	0	0.00513742	0.0367752	0	0	0	0	0.000859396	0	0	0	0	0	0	0.0091046	0	0	0	0	0.00555876	0	0	0	0	0	0	0.00052367	0	0.00487277	0	0	0	0.00450648	0	0	0	0.00367891	0	0.0028599	0	0	0	0	0	5.2512e-05	0	0.00284032	0	0
ko:K01661	0	0	0	0	0	0	0	0	0	0	0.00444549	0	0	0	0.00178825	0	0	0	0	0	0	0	0	0.000158159	0	0	0.000567841	0	0.000548597	0.00257919	0	0	0.000585293	0.00198479	0	0	0	0	0.00039467	0	0	0	0	0	0	0	0.000410797	0	7.91064e-07
ko:K02551	0.0418328	0	0.0246496	0	0.00329744	0	0.0018492	0.0128776	0.000785099	0.000147263	0.00644307	0.00126106	0	0	0.00645402	0	0.000351674	0.00045489	0	0.00608902	0.000102231	0	0	0.000850737	0.00117041	0	0.000540674	0.000326999	0.00140926	0.00334698	0	0.00037771	0.000438836	0.00176999	0	0	0.00163248	0	0.00119467	4.87749e-06	4.82455e-05	0.000408558	0	8.3527e-05	4.05068e-05	1.68249e-05	0.00189214	0	0.000375041
ko:K12373	0	0	0.0995816	0.0564938	0	0.000220959	0	0.00985987	0	0	0	0	0.0010451	0	0.0511738	0	0.00375297	0	0.00328476	0	0	0.00194452	0	0.0028702	0	0.00226158	0.00307229	1.43907e-05	0.0124677	0	0	0	0.0163475	0	5.96483e-05	0.00547544	0.00936236	0	0.00311184	0.00301199	0.000288209	0.00550205	0	0	0.00129189	3.07628e-05	0.0129431	0.00111947	0.00346782
ko:K01130	0	0.0132521	0.0214053	0	0	0	0	0.0100375	0	0	0	0	0	0	0.00947682	0	0	0.000252356	0	0.00224313	0	0	0	0	0	0	0	0	0.00272049	0	0	0	0.00169321	0	0	0	0.00185445	0	0.000542749	0	0	0.000540767	0	0	0	0	0.00451589	0	0.000712187
ko:K07407	0.0022299	0.00187891	0.0674102	0.0491452	0.0867438	0.000310344	0.0204977	0.0276218	0.0218251	0.0157321	0	0.0022953	0.00256727	0.00591846	0.0254358	0.00618438	0.00249383	0.0120718	0.0048322	0.00367569	0	0.00871522	0.00143261	0.0026637	0.00634975	0.00291968	0.0127863	0.00302378	0.00505263	0	0.000767025	0.00239888	0.00359194	0	3.96308e-06	0	0.00735236	0.00327455	0.00358723	0.00608824	0.00304744	0.00275436	0	0.00012744	0.00232626	0	0.00488825	6.84987e-08	0.00105482
ko:K01186	0.188438	0	0.0126644	0.0242205	0.0116415	0.00220856	0.000491241	0.0105775	7.71492e-05	0	0	0.000339357	0	0	0.0165808	0	0	0	0	0	0	0	0.000856888	0.000204661	0	0	0.00281857	0	0.00130967	0	0	0.000731473	0.00323915	0	0.00010362	0.00130377	0.00102156	0	0.00290687	0	0	0.00045497	0	0.000529209	1.64344e-05	6.16478e-06	0.00264963	0	0.000466069
ko:K01126	0.111293	0.0046207	0.0118454	0.00458712	0.00747409	0.00530897	0.00603604	0.0133891	0.00460544	0.00858766	0	0.000336691	0.00136193	0.00141172	0.00448621	5.08885e-05	0.00190306	0.00282059	0.00172452	0.00404983	0	0.00126433	0.00216013	0.000156608	0.000853352	0	2.12936e-05	2.69766e-05	0.00206638	0	0	0.000494828	0.000454585	0	0	0	0.000926521	0.00151512	0	0.000101382	0.00174654	0.0008698	0	0.00133021	0.000787185	0	0.00147647	0.00056095	0
ko:K17103	0	0	0.000526106	0	0	0	0	0.00525804	0	0.00322162	0.00199944	0	0.00267322	0	0.0021404	0	0	0.00174461	0	0	0	0	0	0.000289285	0	0	0.00129673	7.28464e-08	0.000995275	0.00160436	0	0	0.00214744	5.81275e-06	0	0	1.93277e-05	0	0.000742997	0	0	1.22779e-07	0.000445252	0	0	0	0.000592017	0	0
ko:K00111	0	0.00752962	0	0	0	4.58784e-05	0	0	0	0	0	0	0.00139999	0	0	0	0	8.43754e-05	0	0.0103116	0	0	0	0	0	4.5995e-05	0.00302092	0.00181446	0	0	0	0.00127858	0	0	0	0.00207223	0	0	0	0	0	0	0	0	2.05786e-05	0.000630663	0	0	0
ko:K06131	0	0.00154332	0.0183013	0	0	0.00841524	0	0.0170577	0	0.0166359	0	0	0	0.00669943	0.0123048	0.00796572	0.00278855	0	0.00227905	0.00153246	0	0.00170219	0	0.00266321	0	0.00139046	0.00359415	0.00197467	0.00373321	0	0.00277309	0.00217877	0.00399175	0	0	0	0.00200489	0.00282008	0.0024042	0.00151458	0.00248652	0.0010658	0	0.000885489	0.00374912	0	0.00244209	0.000837161	0
ko:K00113	0	0	0	0	0	0	0	0	0	0	0	0	0	0	0	0	0	0.000213949	0	0	0	0	0	0	0	0	0	0	0	0	0	0	0	0	0	0	0	0	0	0	0	0	0	0	0	0	0	0	0
ko:K01613	0	0.0127029	0.00549614	0	0	0	0	0.00381786	0	0.00363077	0	0	0.00117596	0	0.00132124	0	0	0	0	7.27019e-06	0	0	0	0	0	0	0.00141568	2.25871e-07	0.00132851	0.00162102	0	0	0.000893198	0.000142089	0	0	0.000690505	0.00125868	0.000977009	0	0	3.7219e-05	0.000974197	0	0.000842974	0	0.000761819	0	0.000117188
ko:K18697	0	0.00290299	0	0	0	0	0	0	0	0	0	0	0	0	0	0	0	0	0	0.00215238	0	0	0	0	0	0	0	0	0	0	0	0	0	0	0	0	0	0	0	0	0	0	0	0	0	0	0	0	0
ko:K00981	0.0335873	0.000115657	0.00582176	0.0123273	1.61162e-05	0.000194388	0.00147584	0.00123177	0.000283864	0.00382286	0.00229656	0.00152536	0.00283828	0.0035954	0.00494162	0.00357109	0.00269002	0.00216484	0.00218743	0.00148681	0.00279896	0.00156495	3.77261e-05	0	0	0.000838831	0.00154459	0.000887901	0.00163135	0.00114385	0.00106002	0.000891419	0.00130734	0.00115794	5.02522e-07	0.00130325	0.000422534	0.000803061	0.000931401	0.000551196	0	0.00114966	0.000678881	0.000495925	0.000181136	3.94094e-05	0.00081086	0.000790968	0
ko:K00655	0.0575108	0.000194798	0.00237837	0.0128273	0.00559974	0.00676759	0.00570943	0.00257281	0.000627357	0.00501454	0.00380149	0	0	0.00421827	0.004263	0.00429756	0.00270298	0.00276371	0.00222904	0.00397874	0	0.00152733	0.000202785	0.00240376	0.00026059	0	0.00575003	0.00136895	0	0.00124821	0.001306	0.00196063	0.00108143	0.000895004	0.000656	0.00172134	0.000509013	0.00093078	0.00124091	0.00103132	0.00132653	3.38397e-05	0.000905225	0.00139758	0.000219772	0	0.0013135	0.000815149	0.000513985
ko:K00112	0	0	0	0	0	0	0	0	0	0	0	0	0	0	0	0	0	8.38474e-05	0	3.81378e-06	0	0	0	0	0	0	0	0	0	0	0	0	0	0	0	0	0	0	0	0	0	0	0	0	0	0	0	0	0
ko:K00995	0.0329944	0.00132501	0	0.00603098	0.00984985	0.0016274	0.00580619	0.00217815	0.00566088	0.00263486	0	0.00236616	0	0.00276456	0	0.00267384	0.00208924	0	0.00159591	0.00153611	0.00170048	0.000911629	0.00194077	2.27517e-05	0.000950924	4.68109e-05	0.00112148	6.37465e-05	0	0	0.000245372	0.000141486	0.00083929	0	6.53904e-06	0.000793787	0	0.000565277	0.000653069	1.79038e-05	0.000581859	0	0	1.52927e-05	0.000295219	5.36108e-05	0	0.000420194	1.79695e-05
ko:K00057	0.0653107	5.86862e-05	0.0127643	0.000558065	0.000563622	2.27217e-05	0	0.00634051	0	0.00567164	0.00324138	0.013661	9.69954e-06	0.00307598	0.0011487	0.00227079	0.00166009	0.00443048	0.00128973	0.000439951	0.00338469	0.000607282	0	0.00095782	0	0.000134211	0.00177808	4.93761e-05	0.00109795	0.00188764	0.000444339	0.0012034	0.00189829	0.000990106	0.000178962	0.00142206	0.0012057	0.000928119	0.00122305	0	0.00154326	0.00112046	0.000799274	0	2.88827e-06	0	0.000531093	0.000518524	0.000350014
ko:K01095	0	0.00241593	0	0	0	0	0	0.0044969	0	0	0	0	0	0	0	0	0	0	0	0.000201252	0	0	0	0	0	0	0	0	0	0.0011526	0	0	0.000748322	0	0	0	0	0	0.000448232	0	0	2.85067e-05	0.000484608	0	0	0	0	0	0
ko:K01190	0.198861	0.0430049	0.137885	0.0416683	0.0448368	0.035085	0.00290363	0.116479	0.00552712	0.0248596	0.0108242	0.0193052	0	0.00354022	0.0906558	0.00388939	0	0.00862718	0.000141139	0.00333767	0.00800343	0.000954126	0.00163862	0.00737677	0.00088442	0.00919246	0.0329395	0.00955	0.0391507	0	0.0003309	0.00609301	0.0259455	0	1.00512e-05	0.00412254	0.015008	0.000525559	0.010949	0.0096695	0.0112266	0.0133262	5.47521e-05	0.00547684	0.00483862	0.000241822	0.0294417	0	0.00512766
ko:K01754	0.0463631	0.0134561	0.020036	0.011756	2.43034e-06	0.00599209	0.00773386	0.00260773	0.00312045	0	0.00911002	0.00855182	0.00350845	0.00467389	0	0.00454835	0.00345696	0.00480983	0.00258908	0.000586019	0	0.00176442	0.000731486	3.64175e-05	0.00017192	0	0.00228736	0.00114352	2.76621e-06	0.00266638	0.00155031	0.000800827	0.00562815	0.00192922	0.000575425	0.00186716	0.00134715	0	0	0	0	1.08536e-06	0.000852588	0.000377243	0	0	0	0	0.000769456
ko:K00813	0	0.00708266	0	0	0	0	0	0	0	0	0	0	0	0	0	0	0	0	0	0.000508745	0	0	0	0	0	0	1.5667e-05	0	0	0	0	0	0	0	0	0	0	0	0	0	0	0	0	0	0	0	0	0	0
ko:K00832	0	0.0360618	0	0	0	0	0	0	0	0	0.00461398	0	0.00786446	0	0	0	0	0.00416713	0	0.00245558	0	0	0	0	0	0	2.34335e-05	0	0	0.00377986	0	0	0	0.000226224	0	0	0	0	0	0	0.00177215	0	0	0	0	0	0	0	0
ko:K00220	0	0	0	0	0	0	0	0	0	0	0	0	0	0	0	0	0	0	0	0	0	0	0	0	0	0	0	0	0	0	0	0	0	0	0	0	0	0	0	0	0	0	0	0	0	0	0	0	0
ko:K01696	0.000175192	0.0123609	0.018761	0.0710725	1.03176e-05	1.21256e-06	0.00131481	0.00923559	0.000539875	0.00515749	0.00564882	2.13331e-05	0.00189959	0.00245248	0.00156448	0.00280954	0.00128751	0.00637221	0.00435069	0.00147671	0	0	0.000119043	0.000313587	0.000849496	0	0.00223265	6.80178e-05	0.000429737	0.00292589	0.000393454	0	0	0.00237681	1.08093e-06	0	0.00166957	0	0	0.000983434	3.89955e-05	0.000139508	0.00113238	0	0.000141295	0	0.000120523	0	0.000457456
ko:K03825	0	0.00153325	0	0	0	0	0	0	0	0	0	0	0	0.00296806	0	0.00280978	0	0	0	0.000926746	0	0	0	0	0	0	0	0	0	0.000258532	0	0	0	0	0	0	0	0	0	0	0	0	0	0	0	0	0	0	0
ko:K14170	0.00159262	0.0149604	0	1.6689e-05	0.0234389	0.0301263	0.00210768	0	0.0126334	0.0151117	0.00781286	4.92521e-06	0.0100203	0.004501	0	0.0055083	0.00473259	0.00849882	0.00431592	0.00718623	0.00826462	0	0.00130706	0.00383388	0.00210953	7.86747e-06	0.00028776	0.00294972	0	0.00571394	6.54912e-05	0.0029336	0	0.00443502	0	0.00353883	0	0	0	0.00268549	0	0	0.0019868	0.000145839	0.0018853	0	0	0	0.00126596
ko:K04517	0	0	0	0	0.0091309	0.0140625	0.00951307	0	0.00900348	0.0114757	0.00547837	0.0176854	0.00175599	0.000385409	0	0.00101174	0.00385423	0	0.00288322	0	0.00451803	0.0011693	0.00308588	0.00208938	0.00251891	0.00164938	0.00282806	0	0	0.00430772	0.00028707	0.00155454	0	0.000282004	2.62656e-06	0.0021799	0	0	0	0.000447972	0.00151955	0	0.00119507	0.00031557	0.00115872	9.262e-05	0	0.000157121	1.64515e-05
ko:K13498	0	0	0	0	0	0	0	0	0	0.00294833	0	0	0.00274693	0	0	0	0	0.00423733	0	0.000649556	0	0	0	0	0	0	0	0	0	0.00244697	0	0	0	0.000788962	0	0	0	0	0	0	0	0	0	0	0	0	0	0	0
ko:K01004	0	0	0	0	0	0	0	0	0	0	0	0	0	0	0	0	0	0	0	0	0	0	0	0	0	0	0	0	0	0	0	0	0	0	0	0	0	0	0	0	0	0	0	0	0	0	0	0	0
ko:K09471	0	0	0	0	0	0	0	0	0	0	0	0	0	0	0	0	0	0	0	0.0072196	0	0	0	0	0	0	0	0	0	0	0	0	0	0	0	0	0	0	0	0	0	0	0	0	0	0	0	0	0
ko:K03707	0.0361055	0	0	0	0.00570651	0.00019301	0.00544919	0.000156951	0.00363477	0	0	0.000307566	0.000163493	8.18051e-05	0	0.00129333	0	0	0.000422443	0.00159543	0	0.000716201	0.0015855	4.87823e-06	0.00412969	5.09905e-05	0	6.87396e-06	0	0	0	1.62393e-05	0	0	0	0	8.00921e-05	0	0	0	0.000826165	0	0.000123319	0	0.000116021	0	0	0	0
ko:K00484	0	1.50666e-06	0	0	0	3.89759e-05	0	0	0	0	0	0	0	0	0	0	0	0	0	0.000503072	0	0	0	0	0	0	0	0	0	0	0	0	0	0	0	0	0	0	0	0	0	0	0	0	0	0	0	0	9.86241e-05
ko:K08281	0.000721932	0.000197248	0	0.000501197	0.00661008	0.00233805	0.00113627	0	3.73237e-06	0	0	1.27682e-05	0	0.00285202	0	0.00213287	0	0	0	0.00109189	0	0	0.000172962	0	0.000761132	0	0	0	0	0	0.00065534	0	0	0	0	0	0	0	0	0	0	0	0	7.20076e-06	0	1.16726e-05	0	0	0
ko:K03784	0.00137152	0.00849939	0	0	0.0024616	0	0.00265745	0	0	0	0	0	0.00170432	1.77227e-05	0	2.37786e-05	0.00192573	0.00305549	0.00136943	2.5708e-05	0.00262917	0.000999406	0.00150964	0	0	8.81328e-05	0	0	0	0	0	0	0	0	0	0	0	0	0	0	0.00080055	0	0	0.000122028	0.000704258	0	0	0.000444305	0
ko:K00763	0.000160201	0.0112203	0	0.000331593	0.0810066	5.48603e-06	0.00429418	0	0.00384663	0.00948222	0.00384904	1.91979e-06	0.00333795	0.000304683	0.0046737	0.00043113	0.00394451	0.00260423	0.00288922	0.00298672	0.00432755	0.00209425	0.00289003	0	0.00114353	1.59343e-05	0.000844297	0.000840968	0	0.00234591	9.67547e-05	3.76678e-05	0	0.00191164	0.000244227	0.00284275	0	0.00293402	0	0.000544911	0.00429412	0	0.000975515	1.42434e-05	0.000899879	2.33761e-06	0.00138393	0.000850787	0
ko:K03525	0.0497927	0	0	0.000233307	0.00344056	0.000387671	0.0013556	0	0.00173907	0	0.0027161	0.00171602	0.00154158	0	0.00256315	0	0	0.00163513	0	0	0.0047232	0	0.000451546	0.000269189	0.000456693	0	0.00173933	0	0.00095213	0.00130147	0	0.000792552	0	0.000990101	0.00016018	0.00245434	0	0	0	0.00104976	0	0.000202798	0.000579805	0.000321375	0.000553775	0.000619591	0.000659666	0	0.000510202
ko:K13799	0	0	0	0	0	0	0	0	0	0	0	0	0	0	0	0	0	0	0	0	0.00149234	0	0	0	0	0	0	0	0	0	0	0	0	0	6.13368e-05	0	0	0	0	0	0	0	0	0	0	0	0	0	0
ko:K00878	0.059546	0.00172966	0.000557592	0.000420899	0.00624725	0.000750705	2.3371e-07	0.000950328	0	0	0.00253186	0.00397209	0.00359488	7.03189e-05	0	0.00113013	0	0.00332719	0.000913348	7.61744e-06	0.00258577	0.000675025	0	0.00144739	4.65309e-06	4.8047e-05	0.00122119	0.00117307	0	0	0	0.000856805	0	0	2.16061e-05	0.00120641	0	0	0	0.00022333	0.000946815	0	0	0.000740699	0.00141297	0.00106458	0	0	0.000233962
ko:K03151	0	0.00435352	0	0	0	0.00114739	0	0	0	0.00656011	0	0	0	0.00504688	0	0.00506271	0.00205321	0	0.00199335	0.0033384	0.0035796	0.00134818	0	0.00047504	0	0	0.000932357	0.000826867	0	0	0.00164788	0.00173071	0	0	0.00147247	0.00201314	0	0.00103034	0	0.000971487	0.00165406	0	0	3.15917e-05	0.000531417	0	0	0.000778744	0
ko:K14153	0	0.000792555	0	0	0	0	0.000587188	0	0	0	0.00236235	0	0.00345021	0.000112825	0	0.000945598	0	0.00337099	0.000863544	6.70974e-05	0	0.000590959	0	0	0.00159753	0	0	0	0	0.00124543	0	0	0	0.00111351	0	0	0	0	0	0	0	0	0	0	0	0	0	0	2.65842e-05
ko:K03147	0.000140682	0.0184731	0.00493371	0.000317465	0.0536176	0.000106824	0.00343946	0.0026661	0.00219655	0	0.00626671	0.000724362	0.000836713	0	0.00591831	0	0	0.00657951	0	0.00243764	0.0042755	0	0.00301632	0.00315549	0.00321105	0	0.00208663	0	0.00528507	0.00197956	0	0.00413335	0.00308856	0.00135346	0	0.00255174	0.000703037	0	0.00130247	0	0	3.36158e-05	0.001169	7.69606e-05	0.000530568	3.85438e-05	0.000250935	0	0.000503729
ko:K04487	0	0.00105163	0	0.0551156	0	0.00177274	0.0012684	1.27593e-07	0.00693237	0.0121966	0	0.000393694	0.000866745	0.00838636	0	0.00845885	0.00527807	0	0.00448259	0.00101596	0.0111915	0.00144161	0.000322844	0.00125887	0	6.11345e-07	0.00397553	0.00195532	0	0	0.00286832	0.000292419	0.000102935	0	0.000163079	0.00392951	7.04018e-05	0.00213809	0	0.00181689	0.00311828	0	0.00101268	0.00195396	0.00193061	0.000259308	0	0.00147318	0.000764793
ko:K00788	0	0.000698737	0.0178463	0	0	0.000608576	0	0.011314	0	0	0.00439267	0	0.00412539	5.55164e-05	0.00185303	0.000890902	0	0.00253829	0.000643417	5.91549e-05	0	0.000595597	0	0.00181629	0	0.000545284	0.00139671	0.00050992	0.000904507	0	0	0.00150703	0.00235578	0.00064011	0	0	0.00146391	0	0.00104798	0.000771117	0.000696549	0.000862008	0.000854416	0.000540218	0.0017897	0	0.000524579	0	2.34374e-05
ko:K01497	0	0.000190406	0	0	0	0	0	0	0	0	0	0	0	0	0	0	0	0	0	0.00222378	0	0	0	0	0	0	0	0	0	0	0	0	0	0	0	0	0	0	0	0	0	0	0.000439538	0	0	0	0	0	0
ko:K03474	0	0.000169546	0	0	0	0	0	0	0	0	0	0	0	0	0	0	0	0	0	0	0.00285104	0	0	0	0	0	0	0	0	0	0	0	0	0	0	0	0	0	0	0	0	0.000716312	0.000694218	0	0	0	0	0	3.38135e-07
ko:K07141	0	0	0	0	0	6.83516e-05	0	0	0	0	0.00283985	0	0.00304516	0	0	0	0	0.00298115	0	0	0	0	0	0	0	0	0	0.000199517	0	0.00112901	0	0	0	0.00116908	0	0	0	0	0	6.42874e-05	0	0	0	0.000547693	0.000564977	0	0	0	0
ko:K03831	0	0	0	0	0	0	0	0	0	0	0	0	0	0	0	0	0	0	0	0.00127557	0	0	0	0	0	0	0	0	0	0	0	0	0	0	0	0	0	0	0	0	0	0	0.00132756	0	0	0	0	0	0
ko:K03637	0	0	0	0	0	1.23465e-06	0	0	0	0	0.00187776	0	0.000629153	0	0	0	0	0.00245045	0	0.000787689	0.00208961	0	0	5.52144e-06	0	1.4472e-05	0.00145534	0.000990191	0	0.00165438	0	0.000747607	0	0.000515988	0	0.00128302	0	0	0	0.000798124	0	0	0.000449201	0.000855532	2.14932e-05	1.66241e-05	0	0	0
ko:K00950	0.0392358	0.00654119	0.0181722	0.00943613	0.0161533	0	0.0027012	0.00459449	0.00125892	0	0.00224638	0.00381734	0	0.00253387	0.00421549	0.00254218	0.00151622	0.00144467	0.000973462	0.00096972	0.00214633	0.000836364	7.80704e-06	0.00124212	0.000810067	0	0	0	0.00118166	0.000958236	0.000722437	0.000887046	0.00163267	0.000905799	0	0	0.00143762	0	0.00125448	0	0.00175097	0.000478725	0.000537318	0	0.00074506	0	0.00114641	0.000417935	0
ko:K22100	0	0	0	0	0	0	0	0	0	0	0	0	0	0	0	0	0	0	0	0	0	0	0	0	0	0	0	0	0	0	0	0	0	0	0	0	0	0	0	0	0	0	0	0	0	0	0	0	0
ko:K03635	0	8.81586e-08	0	0	0	0	0	0	0	0	0	0	0	0	0	0	0	0	0	0	0	0	0	0	0	0	0	0	0	0	0	0	0	0	0	0	0	0	0	0	0	0	0.000991359	0	0	0	0	0	0
ko:K03639	0	0.0116303	0.000289494	0	0	0	0	0.000485643	0	0	0.00334675	0	0.00317375	0	1.7395e-05	0	0	0.00335273	0	2.18328e-05	0.00247661	0	0	0.00127695	0	7.79242e-05	0.0021193	0.000791612	0.000464124	0.00191851	0	0.00111215	0	0.00108739	1.76887e-05	0.00180238	0.000348951	0	8.33455e-05	0.000895848	0	8.90332e-05	0.000711773	0.000801101	0.00106299	0.000682787	0	0	0
ko:K19267	0	0.00993275	0	0	0	0	0	0	0	0	0	0	0	0.00164407	0	8.43064e-05	0	0	0	0.000687555	0	0	0	0	0	0	0	0	0	0	0.000242492	0	0	0	0	0	0	0	0	0	2.77208e-05	0	0	0	0.00029377	0	0	0	0
ko:K00121	0	0.00889874	0	0	0	0	0	0	0	0	0	0	0	0	0	0	0	0.00124951	0	4.20303e-05	0	0	0	0	0	0	0	0	0	0	0	0	0	0	0	0	0	0	0	0	0	0	0	0	0	0	0	0	0
ko:K01096	0	0.00019412	0	0	0	0	0	0	0	0	0	0	0	0.00227712	0	0.00226135	0.00113047	0	0.000966766	1.23743e-05	0	0	0	0	0	0	0	0	0	0	0.000433168	0	0	0	0	0	0	0	0	0	0	0	0	0	0	0	0	0	0
ko:K07029	0.0471813	0	0	0.0147682	0.0295367	0	0.00569753	0	0.00250372	0.00470028	0	0.00354543	0	0.000419033	0	0.000291165	0.00221117	0	0.00160495	0	0.00260717	0.00101855	0.000546629	2.98028e-05	0.00172763	0	0	0	0	0	0.000473932	0	0	0	0	0.00109316	0	0.000771645	0	0	0.00127599	0	0	0	0	0	0	0.000502893	0
ko:K00968	0	0.00531284	0	0	0	0	0	0	0	0	0	0	0	0	0.00402442	0	0	0	0	0	0	0	0	0	0	0	0	0	0.000699557	0	0	0	0	0	0	0	0	0	0	0	0	0.0013376	0	0	0	0	0.000981157	0	0.00123064
ko:K00980	0	0.00241111	0.00040025	0	0	0	0	0.00173634	0	0.00533687	0	0	0	0	0.00182639	0	0	0	5.47268e-07	0	0	0	0	5.35006e-05	0	0	0	3.51747e-06	0.000317478	0	0	0	0.00121748	0	1.61678e-05	0	0	0.00087085	0	8.32723e-06	0	0.000607039	6.39311e-05	0	0	0	0.000439643	0	0.000210474
ko:K08591	0	2.1311e-06	0	0	0	0.000168951	0	0	0	0.00270397	0.00206087	0	0.000909849	0.00222218	0	0.00220789	0.0016613	0.00104279	0.00130714	0.000254897	0.00209297	0.000888345	0	0.00124227	0	1.04336e-05	0.00281581	0	0	0.00139364	0.000962254	0.000756532	0	0.000445909	0	0.00102352	0	0.00123195	0	0.000644875	0.000773152	0	0.000464658	0	0.000578458	0	0	0.000457873	0.000583535
ko:K08744	0.0326456	4.26911e-05	0	0.00596723	0.00974573	0.0016102	0.00276972	0	0.00263968	0	0	0.00234115	0	0	0	0	0	0	0	0.00151987	0.0016825	0	0.000908141	2.64552e-05	0.000734116	4.63161e-05	0.0021499	6.30726e-05	0	0	0	0.00013999	0	0	6.46992e-06	0.000849787	0	0	0	1.77145e-05	0	0	0	1.5131e-05	0.000292098	0.000123322	0	0	0
ko:K14260	0.163765	4.48807e-05	0.0129623	0.0238449	0.0222456	0	0.0162153	0.000338894	0.0180391	0	0	0.0100413	0.00106738	0.00100403	6.8239e-05	0.000795936	0.00509831	0	0.00362684	4.89568e-08	0.00385221	0.00278147	0.00621209	0.00228804	0.00572833	0	0	1.66932e-06	0.00358567	0	0.000455456	0.00151252	0.000923847	0	3.49708e-05	0.00219097	0.00159017	0	0.0026412	0	0	0.000307831	0	0	0.000668999	0.000260813	7.28426e-06	0.00101038	0
ko:K00128	0.0576118	0.000519939	0	0.00551416	0.031848	0	0	0	0	0	0	0.0146824	0	0	0	0	0	0	0	0.00142706	0	0	0	0.000153972	0	0	0.00468351	3.09218e-06	0.00240128	0	0	0.003184	0	0	0	0	0	0	0	0	0	0	0	0	0.000840733	0	0.00196374	0	0
ko:K01918	0	0.00885682	0.00105491	0	0	0	0	0.00745504	0	0	0.00272976	0	0.00354699	0	0.00108967	0	0	0.00233704	0.000661495	0.00012023	0.00250009	0.000120891	0	0.000689521	0	0	0.00154137	3.80081e-05	0.00109621	0.000938471	0	0.000674309	0.00100438	0	0	0	0.000127761	0	0.000344795	0.000542981	0	0.000335945	0.000574485	0	0.000302909	3.70491e-06	0.000317357	0	0.000515973
ko:K02822	0.00648483	0.00438998	0	0.00557844	0.00397955	0	0.000102066	0	0	0	0	0	0	0	0	0	0	0.00113483	0	0.00200837	0.00465352	0.00193482	0	0.000338592	0	0	0.000873257	0	0	0.000735334	2.74681e-05	0	0	0.000624111	0	0.00257997	0	7.88265e-06	0	0	0.000585477	0	0	0	2.99477e-06	0.000397431	0	0	0
ko:K03475	0.0179225	0.00791151	0	4.83802e-05	0.0102557	0	0.000118751	0	0	0	0	0	0	0	0	0	0	0.00268751	0	0.00313668	0.0051531	0.00550638	0	0.00122633	0	0	0.00244299	0.000147432	0	0.00224059	8.27402e-05	0	0	0.0019171	0	0.00528958	0	3.05085e-05	0	0	0.00172309	0	0	0	0.000355597	0.000738825	0	0	0
ko:K02821	0.00697311	0.00123865	0	0.0062294	0.00425857	0	0.000113529	0	0	0	0	0	0	0	0	0	0	0	0	0.00244275	0.00110884	0.00192958	0	0.000351456	0	0	0	0	0	0.00064922	0	0	0	0.000644722	0	0.0015123	0	8.07704e-06	0	0	0.00064645	0	0	0	2.94033e-06	0.000553682	0	0	0
ko:K00901	0	0.000110682	0	0	0	0	0	0	0	0.00392535	0	0	0	0.000258743	0.000186857	0.00246863	0.00220396	0	0.00179714	0.000307267	0.00243168	0.00134721	0	0	0	0	0	0.000274036	5.03593e-07	0	0.000946035	0.00090561	0	0	0.000254867	0.00115623	0	0	0	0	0.00086603	1.78107e-06	0.000331364	0	0	3.3429e-05	0.000626383	0.000623264	0
ko:K03150	0	0	0.0139917	0	0	0	0	0.00671922	0	0	0.00862311	0	0.00512463	0	0.00970089	0	0	0.00280198	0	9.8996e-05	0.00197239	0	0	0.00260649	0	0	0.00121394	0.000303586	0.000962512	0.00240004	0	0.00541925	0	0.0032622	0.00142699	0	0.00126498	0	0	0.00156633	0	0.00128645	0.000808297	0	0.000832503	0	0.00309147	0	0.000723434
ko:K01713	0	0	0	0	0	0	0	0	0	0	0	0	0	0	0	0	0	0	0	0.000395654	0	0	0	0	0	0	0	0	0	0	0	0	0	0	0	0	0	0	0	0	0	0	0	0	0	0	0	0	0
ko:K01077	0.0277367	0.0285042	0	0.00479874	0	0.000172552	0.0150093	0	0.00272423	0	0.0063991	0.00218494	0.000153955	0	0.0104195	0	0	0	0	0.000619105	0	0	0.00401395	0	0.00226588	0	0	0	0.00387206	0	0	0	0.00391109	0	0	0	0	0.00169465	0	0	0	0.00243235	0	0.00128081	0	0	0.00253616	0	0.00111851
ko:K01947	0	0	0	0	0	0	0	0	0	0	0	0	0	0	0	0	0	0	0	0	0	0	0	0	0	0	0	0	0	0	0	0	0	0	0	0	0	0	0	0	0	0	0	0	0	0	0	0	0
ko:K01012	0	0.00678398	0	0	0	0	0	0.000603401	0	0	0.00634753	0	0.00308685	0	0.00298374	0	0	0.00627453	0	0.000304358	0.00145461	0.00115868	0	0.00241555	0	0	0.00585416	0.00063734	0.00159819	0.00492971	0	0.00176599	0	0.00144084	0.00127838	0	0	0	0	0.00184058	0	0.000601248	0.000760875	0	0.00118135	0	0.000793158	0	4.32515e-06
ko:K00082	0	0	0	0	0	0	0	0	0	0	0	0	0	0	0	0	0	0	0	0	0	0	0	0	0	0	0	0	0	0	0	0	0	0	0	0	0	0	0	0	0	0	0	0	0	0	0	0	0
ko:K03750	0	0.00230715	0	0	0	0.00176238	0	0	0	0	0.00363498	0	0.00283342	0	0	0	0	0	0	0	0	0	0	0	0	0	0	0	0	0.00239421	0	0.00130306	0	0.000122028	0	0.00182187	0	0	0	0	0	0	0.0017632	0.00018589	0.00128926	0.00085841	0	0	0
ko:K03752	0	0	0	0	0	0	0	0	0	0	0.00812948	0	0.0092971	0	0	0	0	0.000638501	0	0	0	0	0	0	0	0	0	0	0	0.00437784	0	0.000207398	0	0.00315213	0	0	0	0	0	0	0	0	0.00200542	0	1.88708e-05	0	0	0	0
ko:K06879	0	0.00927237	0	0	0	0	0	0	0	0	0	0	0	0	0	0	0	0	0	0.000387959	0	0	0	0	0	0	0	0	0	0	0	0	0	0	0	0	0	0	0	0	0	0	0	0	0	0	0	0	0
ko:K09007	0	0	0	0	0	0	0	0	0	0	0	0	0	0	0	0	0	0.00124144	0	0	0	0	0	0	0	0	0	0	0	0	0	0	0	0	0	0	0	0	0	0	0	0	0	0	0	0	0	0	1.39615e-07
ko:K07306	0	0.0877263	0	0	0	0	0	0	0	0	0	0	0	0	0	0	0	0	0	0.0163797	0	0	0	0	0	0	0	0	0	0	0	0	0	0	0	0	0	0	0	0	0	0	0.000384165	0	0	0	0	0	0
ko:K07308	0	0.00912347	0	0	0	0	0	0	0	0	0	0	0	0	0	0	0	0	0	0.00571037	0	0	0	0	0	0	0	0	0	0	0	0	0	0	0	0	0	0	0	0	0	0	0.000720123	0	0	0	0	0	0
ko:K07307	0	6.87424e-05	0	0	0	0	0	0	0	0	0	0	0	0	0	0	0	0	0	0.0021067	0	0	0	0	0	0	0	0	0	0	0	0	0	0	0	0	0	0	0	0	0	0	0.000192719	0	0	0	0	0	0
ko:K00336	0	0.000471001	0	0	0	0	0	0	0	0	0.00987659	0	0.00636346	0	0	0	0	0	0	0.000504576	0	0	0	0.00118286	0	0	0.0080128	1.93792e-05	0	0.0106166	0	0.00701687	0	6.84538e-05	0	0	0	0	0	0	0	0	0.00227794	0	0.00283296	0	0	0	0
ko:K06209	0	0	0	0	0	0	0	0	0	0	0.00132352	0	0.000706451	0	0	0	0	0.00114967	0	0	0	0	0	0.00107748	0	0.000487808	0	0.000513549	0	0.000695446	0	0	0	0.000509983	0	0	0	0	0	4.1895e-06	0	0	0	0	4.71223e-06	0	0	0	0
ko:K03783	0	0.00304262	0	0	0	0.00286273	0	0	0	0	0	0	0	2.85577e-05	0	0.000666059	0.00192812	0	0.00185335	0	0.00366878	0.00133109	0	0.00114842	0	0	0.002163	5.46834e-05	0.00199566	0	0.00101263	0.00228078	0.000564928	0	0	0	0	0	0.00117166	1.86773e-05	0	0	0	0	2.54505e-05	0.00141357	0	0.000708248	0
ko:K06897	0	0	0.000554675	0	0	0	0	2.07628e-05	0	0	0	0	0	0	0	0	0	0.00263947	0	0.000223718	0	0	0	0	0	0	0	0	0	0	0	0	0	0	0	0	0	0	0	0	0	0	0	0	0	0	0	0	0
ko:K02619	0.156853	0.0142545	0.00768397	0.00170225	0.0156788	0.0008616	0.000450015	0.000386134	0	0	0.00744695	0.0049868	0.00152618	0	0.00499337	0	0	0	0	0.00271125	0	0.00183958	0	0.00915411	0	0.0030053	0.000753232	0.000480557	0.00310534	0	0	0.0019115	0.0021501	0	5.25274e-06	0	0.000579184	0	0.00148091	0.0032712	0	0	0	0.000430636	0.00133294	0	0.00132615	0	0.000636772
ko:K00335	0	0.000126969	0	0	0	0	0	0	0	0	0	0	0	0	0	0	0	0.00590312	0	4.25001e-06	0	0	0	0	0	0	3.45732e-05	1.49432e-05	0	0	0	0.00294008	0	0	0	0	0	0	0	0.000617537	0	5.71163e-05	0.00146989	0	8.25708e-05	9.41981e-05	0	0	0.000535267
ko:K00334	0	0.000441195	0	0	0	0	0	0	0	0	0	0	0	0	0	0	0	0	0	3.61994e-05	0	0	0	0	0	0	0.00109678	0	0	0	0	0	0	0	0	0	0	0	0	0	0	0	0.000364631	0	0.00019502	0	0	0	0
ko:K01058	0	0.00355728	0	0	0	0	0	0	0	0	0	0	0	0	0	0	0	0	0	0.00380663	0	0	0	0	0	0	0	0	0	0	0	0	0	0	0	1.32662e-05	0	0	0	0	0	0	0.000535878	0	0	0	0	0	0
ko:K01580	0	0.00433087	0	0	0	0	0	0	0	0	0	0	0	0	0.000183622	0	0	0	0	0	0	0	0	0	0	0	0.00870717	0	0.00494529	0	0	0	0	0	0	0	0	0	0	0	0	0.000256185	0	0	0	0	4.4991e-05	0	0.00149265
ko:K03146	0	0	0	0	0	0	0	0	0	0	0	0	0	0	0	0	0	0	0	0	0	0	0	0	0	0	0	0	0	0	0	0	0.000571745	0	0	0	0	0	0.000280434	0	0	0	0	0	0	0	0	0	0
ko:K21063	0	0	0.00480389	0	0	0	0	0.0015491	0	0	0	0	0	0	0.000137289	0	0	0	0	0	0	0	0	0	0	0	0	0	0.00160742	0	0	0	0	0	0	0	0.000387749	0	0	0	0	0	0	0	0	0	0	0	0
ko:K14654	0	0	0	0	0	0	0	0	0	0	0	0	0	0	0	0	0	0	0	0	0	0	0	0	0	0	0	0	0	0	0	0	0	0	0	0	0	0	0	0	0	0	0	0	0	0	0	0	0
ko:K03473	0	0.00270828	0	0	0	0	0	0	0	0	0	0	0	0	0.00408906	0	0	0	0	0.00120586	0	0	0	0	0	0	0	0	0.00183226	0	0	0	0	0	0	0	0	0	0	0	0	5.20985e-05	0	0	0	0	0.00142504	0	0
ko:K01633	0	3.31012e-06	0.00400896	0	0	0	0	0.000589995	0	0	0.00128563	0	0.00109378	0.0014731	0.00122409	0.00144912	0.000807363	0	0.000679056	0	0	0.000487143	0	0	0	0	0	0	0	0.000711215	0.000346213	0	0.000525786	0.000126504	0	0.000556314	0.000367364	0	0.000114675	0	0.000414195	0.000273176	0.000261294	0	0	0	0.000287206	0.000242544	0
ko:K10026	0	0.00750321	0	0	0	0	0	0	0	0	0.0021604	0	0.00227357	0.00100554	0.00232258	0.000470578	0	0.00173882	4.92795e-05	0.00116954	0	0.000873096	0	0	0	0	0	0	0.000374069	0.00100401	0.000142562	0.000654729	3.0897e-05	9.40347e-05	0	0	0	0	1.24131e-05	0	0	0.000211923	0.000585068	0	2.0841e-05	0	0.000664805	0.000411951	0.000531394
ko:K00156	0	0.0060106	0	0	0	0	0	0	0	0	0	0	0	0	0.00595879	0	0	0	0	0.00249514	0	0	0	0	0	0	0	0	0	0.00249195	0	0	0	0.00197615	0	0	0	0.00116882	0	0	0.00188271	0	0	0	0	0	0.00165841	0	0.00111361
ko:K01634	0	0	0	0	0	0	0	0	0	0	0	0	0	0	0.000372795	0	0	0	0	0	0	0	0	0	0	0	0	0	0.0100401	0	0	0	0	0	0	0	0	0	0	0	0	0.000520116	0	0	0	0	9.13422e-05	0	0
ko:K01201	0.0067369	0	0	0.00172781	0.00829129	0	0.00178886	0.00810484	0.00120841	0	0	0.00365191	0	0	0	0	0	0	0	0	0	0	0.0021114	0	0.000196175	0.00067668	0	0	0.00161388	0	0	0	0	0	0	0	0	0	0	0.000590979	0.00181564	0.000503271	0	0	0	0	0	0	0
ko:K10804	0.0270861	0.0188278	0	0.022109	0.00195908	0	0.000286647	0	0	0	0	0.000423681	0	0	0	0	0	0	0	0.0029528	0.0121157	0	0	0	0	0	0	0	0	0	0	0	0	0	0	0	0	0	0	0	0	0	0	0	0	0	0	0	0.000160577
ko:K03342	0.204144	0	0	0.0173863	0	0	0	0	0	0	0	0.0047352	0	0.0038349	0	0.00404315	0.000297158	0	0.00263394	0	0	0.00274218	0	0.00244239	0	0	0	0	0	0	0.00118804	3.83287e-05	0	0	0	0	0	0	0	0	0	0	0.000996735	0	0	0	0	0	5.90397e-05
ko:K13940	0.0525041	0	0.00717991	0.0126271	0.0216159	0	0.00361466	0.00559564	0.00168465	0	0	0.00510824	0	0	0	0	0	0	0	0	0	0	1.04471e-05	0.00166217	0.00108401	0	0	0	0	0	0	0.00118702	0	0	0	0	0.000640845	0	0	0	0	0	0	0	0.000997016	0	0	0	0
ko:K07406	0	0	0	0	0	0	0	0	0	0	0	0	0	0	0	0	0	0	0	0.00385749	0	0	0	5.23417e-05	0	0	0.00280842	0	0	0	0	0	0	0	0	0	0	0	0	0	0	0	0	0	0.000251649	0	0	0	0
ko:K17830	0	0	0	0	0	0	0	0	0	0	0	0	0	0	0	0	0	0	0	0	0	0	0	0	0	0	0	0	0	0	0	0	0	0	0	0	0	0	0	0	0	0	0	0	0	0	0	0	0
ko:K09474	0	0	0	0	0	0	0	0	0	0	0	0.00183468	0	0	0	0	0	0	0	0.000235739	0	0	0	0	0	0	0	0	0.0013428	0	0	0	0	0	0	0	0	0	0	0	0	0	0	0	0	0	0	0	0
ko:K00355	0	0.00348805	0	0.000641018	0	0	0	0	0	0	0	0	0	0.00248608	0	0.0023318	0	0	0	0.000971195	0	0	0	0	0	0	0	0	0	6.70508e-05	0.000811558	0	0	6.30431e-05	0	0	0	0	0	0	0	0	0	0	0	0	0	0	0
ko:K11258	0	0	0	0	0	0	0	0	0	0	0	0	0	0	0	0	0	0	0	0.000342786	0	0	0	0	0	0	0	0	0	0	0	0	0	0	0	0	0	0	0	0	0	0	0	0	0	0	0	0	0
ko:K14187	0	0	0	0	0	0	0	0	0	0	0	0	0	0.00548626	0	0.0173514	0	0	0	0	0	0	0	0	0	0	0	0	0	0	0.00323026	0	0	0	0	0	0	0	0	0	0	0	0	0	0	0	0	0	0
ko:K04561	0	0	0	0	0	0	0	0	0	0	0	0	0	0	0	0	0	0	0	0	0	0	0	0	0	0	0	0	0	0.000698697	0	0	0	0.00239979	0	0	0	0	0	0	0	0	0	0	0	0	0	0	0
ko:K01093	0	0.00713946	0	0	0	0	0	0	0	0	0	0	0	0	0	0	0	0	0	0.00148721	0	0	0	0	0	0	0	0	0	0	0	0	0	0	0	0	0	0	0	0	0	0	0	0	0	0	0	0	0
ko:K03788	0	0	0	0	0	0	0	0	0	0	0	0	0	0	0	0	0	0	0	0.00372263	0	0	0	0	0	0	0	0	0	0	0	0	0	0	0	0	0	0	0	0	0	0	0	0	0	0	0	0	0
ko:K00867	0	0.0079126	0	0	0	0	0	0	0	0.00548078	0	0	0	0.00243843	0	0.00247153	0.00181524	0	0.00144643	0.000158947	0	0.000731051	0	0	0	0	0	0	0	0	0.000636724	0	0	0	0	0	0	0.000834239	0	0	0.00130807	0	0	0	0	0	0	0.000520575	0
ko:K00275	0	0	0	0	0	0	0	0	0	0	0	0	0	0	0.00259187	0	0	0	0	0.000860052	0	0	0	0	0	0	0	0	6.20956e-06	0	0	0	0	0	0	0	0	0	0	0	0	0.000267103	0	0	0	0	5.10639e-05	0	0
ko:K02858	0	0.0054426	0	0	0	0	0	0	0	0	0	0	0	0	0	0	0.00166127	0	0.00144231	9.28848e-05	0	0.00107123	0	0	0	0	0	0	9.60561e-07	0	0	0	0	0	0	0	0	0	0	0	0	0	0	0	0	0	0	0	0
ko:K08310	0	0.00291073	0	0	0	0	0	0	0	0	0	0	0	0	0	0	0	0	0	0.000377346	0	0	0	0	0	0	1.91648e-07	3.93946e-05	0	0	0	6.19912e-06	0	0	0	0	0	0	0	0	0	0	0	0	4.96193e-06	0	0	0	0
ko:K02549	0	0.00644198	0	0	0	0	0	0	0	0	0.0032742	0	0	0	0	0	0	0	0	0.000108224	0	0	0	6.90972e-05	0	0	0.000281206	0	0	0.00177416	0	0	0	0.0013496	0	0	0	0	0	0	0	0	0	0	0	0	0	0	0.00053943
ko:K08680	0	0	0	0.0014721	0	0	1.49942e-05	0	2.13914e-05	0	0.00366899	0	0	0	0	0	0	0	0	0.00186663	0	0	0	7.85543e-05	0	0	0.00036104	0	0	0.0017092	0	0	0	0.00187343	0	0	0	0	0	0	0	0	0	0	0	0	0	0	7.34081e-05
ko:K00998	0	0.0101168	0	0	0	0	0	0	0	0	0	0	0	0	0	0	0	0	0	0.000639129	0	0	0	0	0	0	0	0	0	0	0	0	0	0	0	0	0	0	0	0	0	0	0	0	0	0	0	0	0
ko:K01048	0.0387644	0.0136667	0	0.00195027	0.00827993	0	0.00783758	0	0.00740619	0.00513278	0	0.00287887	0	0	0	0	0	0	0	0.00120508	0	0	0.00256503	0	0.000607821	0	0	0.000502462	0	0	0	0	0	0	0	0	0	0	0	0	0	0	0	0	0.000387308	0	0	0	0
ko:K00631	0	0.00511985	0	0	0	0	0	0	0	0	0	0	0	0	0	0	0	0	0	0.0141068	0	0	0	0	0	0	0	0	0	0	0	0	0	0	0	0	0	0	0	0	0	0	0	0	0	0	0	0	0
ko:K10806	0	0.00194025	0	0	0	0	0	0	0	0	0	0	0	0	0	0	0	0	0	0.000736065	0	0	0	0	0	0	0	0	0	0	0	0	0	0	0	0	0	0	0	0	0	0	0.000239502	0	0	0	0	0	0
ko:K10805	0.0375101	0.0104751	0	0.00401965	0.0102481	0	0.000814749	0	0.000539737	0	0	0.00358313	0	0	0	0	0	0	0	0.00171206	0	0	0.000114132	0	0.000326238	0	0	0	0	0	0	0	0	0	0	0	0	0	0	0	0	0	0	0	0	0	0	0	0
ko:K01668	0	0	0	0	0	0	0	0	0	0	0	0	0	0	0	0	0	0	0	0	0	0	0	0	0	0	0	0	0	0	0	0	0	0	0	0	0	0	0	0	0	0	0	0	0	0	0	0	0
ko:K20862	0	6.51658e-05	0.000145208	0	0	0	0	0	0	0	0	0	0	0	0	0	0	0	0	0.00185612	0	0	0	0	0	0	0	0	0.000984344	0	0	0	0	0	0	0	0	0	0	0	0	0	0	0	0	0	0	0	0
ko:K05939	0	0.0108877	0	0	0	0	0	0	0	0	0	0	0	0	0	0	0	0	0	0.00864593	0	0	0	0.000161172	0	0	0.000740282	0	0	0	0	0	0	0	0	0	0	0	0	0	0	6.18359e-05	0.00165784	0	0	0	0	0	0
ko:K06132	0	0.00217449	0	0	0	0	0	0	0	1.52213e-05	0	0	0	0	0	0	0	0	0	0	0	0	0	0.00176476	0	0	0.00471655	0.00732263	0	0	0	0	0	0	3.53941e-07	0	0	0	0	3.24178e-06	0	0	0	0	0.000269151	0	0	0	0
ko:K01667	0	0.000327051	0	0	0	0	0	0	0	0	0	0	0	0	0	0	0	0	0	0	0	0	0	0	0	0	0	0	0	0	0	0	0	0	0	0	0	0	0	0	0	0.000885603	0	0	0	0	0	0	0
ko:K13818	0	0	0	0	0	0.00104472	0	0	0	0	0.00801388	0	0.00895358	0	0	0	0	0	0	0	0	0	0	0	0	0	0	0	0	0.00421608	0	0.0027696	0	0.00303566	0	0	0	0	0	0	0	0	0	0.00242251	0.00108421	0	0	0	0
ko:K00632	0	0.0676477	0	0	0	0	0	0	0	0	0	0	0	0	0	0	0	0	0	0.0256966	0	0	0	0	0	0	0	0	0	0	0	0	0	0	0	0	0	0	0	0	0	0	0	0	0	0	0	0	0
ko:K11358	0.00336612	0	0	0.00398358	0.00225411	0.00665384	0.00681593	0	0.00324278	0	0.00400715	0.000466753	0.00124868	0	0	0	0	0.00333401	0	0	0.00467	0	0.00199479	0.00249472	0.000245426	0.000682526	0.00241508	0.00172969	0	0	0	2.06835e-06	0	0	0	0.00209966	0	0	0	0.00140828	0	0	0	0.00271452	0.000435952	2.66355e-05	0	0	0
ko:K07250	0	0.0123335	0	0	0	0	0.000203679	0	0.00235439	0	0	0.000485292	0.00696207	0	0	0	0	0	0	0.0103907	0	0	0	0.000454409	0	0	0	0.000731505	0	0	0	0	0	0	0	0	0	0	0	0.000228349	0	0	0	0	0.00015327	0	0	0	0
ko:K09472	0	0.000699062	0	0	0	0	0	0	0	0	0	0	0	0	0	0	0	0	0	0.00306185	0	0	0	0	0	0	0	0	0	0	0	0	0	0	0	0	0	0	0	0	0	0	0	0	0	0	0	0	0
ko:K00768	0	0.00577326	0	0	0	0.000107227	0	0	0	0	0.00869735	0	0.00968937	0	0.00266561	0	0	0.00550262	0	0.00261394	0.00360653	0	0	0	0	0	0.00234457	9.71338e-06	0.00157619	0.00587404	0	0.000134343	0	0.00240936	0	0	0	0	0	1.41957e-05	0	0.000298596	0	0	0.000366821	0	0.000922272	0	0
ko:K03148	0.014884	0.00885183	0	0.00982034	0.0121086	9.74985e-05	0.00128696	0	0.000569446	2.3786e-05	0.00275962	0.000697945	0.00121162	0.000110462	0	3.61816e-05	0	0.00150606	0.000470442	0	0	0	0	9.14867e-06	0	0	0	3.05994e-05	0	0	7.32497e-05	0.000721887	0	0.000895222	0	0	0	0.000624843	0	0	0	0	0.000533265	0	0	0	0	0	0
ko:K13950	0.179413	0	0	0.0296881	0	0	0	0	0	0	0	0.00422393	0	0.00682113	0	0.00719155	0.000528554	0	0.00468499	0	0	0.0027231	0	0.00434427	0	0	0	0	0	0	0.00211316	6.81753e-05	0	0	0	0	0	0	0	0	0	0	0	0	0	0	0	0	0.000105014
ko:K00001	0.0875321	0.004482	0	0.00712596	0.0116155	0	0.00471293	0	0.000479521	0.00411099	0.000568515	0.00118865	0.00402333	0.00378515	0	0.00320375	0	0	0	0.0038575	0.00275017	0.000887323	0.00245031	3.42238e-06	9.36409e-05	0	0.00018994	0	0.00136677	0.000165565	0.000860929	0	0	0.000349571	0	0.00134381	0	0.00299219	0	0	0.00406378	0	0	0	0	0.00187939	1.25661e-05	0	0
ko:K01724	0	0	0	0	0	0	0	0	0	0	0	0	0	0	0	0	0	0	0	0	0	0	0	0	0	0	0	0	0	0	0	0	0	0	1.78592e-05	0	0	0	0	0	0	0	0	0	0	0	0	0	0
ko:K00376	0	0	0	0	0	0	0	0	0	0	0	0	0	0	0	0	0	0	0	0	0	0	0	0	0	0	0	0	0	0	0	0	0	0	0	0	0	0	0	0	0	0	0	0	0	0	0	0	0
ko:K03186	0	0.000339071	0	0	0	0	0	0	0	0	0	0	0	0	0	0	0	0.0028948	0	0.00304583	0.000990965	0.00166637	0	0.0025799	0	0	0	0	0	0	0	0.000212888	0	0	0	0	0	0.000241868	0	4.35682e-05	0	0	0.000754757	0	0.000368792	0.00184307	0	0	0
ko:K03149	0.00824461	0	0.00383574	0.0367356	0.00109013	0	0.000769222	0.00228976	0.00111811	0	0.00321815	0.000485715	0.00360354	0	0.00295023	0	0	0.0016776	0	0	0	0	0.000196281	0.000167061	0.000616466	0	0	0.000361684	7.99234e-07	0	0	0.000982455	0	0.000946711	0	0	0.000456613	0	0	0	0	2.07435e-05	0.000408642	0	0	0	0.00113945	0	0
ko:K03809	0	0.000305232	0	0	0	0	0	0	0	0	0	0	0	0	0	0	0	0	0	0.00227465	0	0	0	0	0	0	0	0	0	0	0	0	0	0	0	0	0	0	0	0	0	0	0	0	0	0	0	0	0
ko:K06928	0	0	0	0	0	0	0	0	0	0	0	0	0	0	0	0	0	0	0	0	0	0	0	0	0	0	0	0	0	0	0	0	0	0	0	0	0	0	0	0	0	0	0	0	0.000149921	0	0	0	0
ko:K04092	0.0319343	0	0	0	0	0	0.00388004	0	0.00351031	0	0	0	0.0422569	0.0193056	0	0.0376289	0.000850616	0	0	0	0	0.0147474	0.000909475	0	0.00405296	0	0	0	0	0	0.0178553	0	0	0	0	0	0	0	0	0	0.00415299	0	0	0	0	0	0	1.4814e-05	0
ko:K00999	0	0	0	0	0	0	0.00320997	0	0.00319515	0	0	0	0	0	0	0	0	0	0	0	0	0	0.00109202	0	0.000223078	0	0	0	0	0	0	0	0	0	0	0	0	0	0	0	0	0	0	0	0	0	0	0	0
ko:K20861	0	0.0107259	0	0	0	0	0	0	0	0	0	0	0	3.92772e-06	0	0	0.000995806	0	0.000993268	0.0016914	0	0.000797952	0	0	0	0	0	0	0	0	0	0	0	0	0	0	0	0.00124042	0	0	0.000697972	0	0	0	0	0	0	0	0
ko:K05275	0	0.00325368	0	0	0	0	0	0	0	0	0	0	0	0	0	0	0	0	0	0.00147321	0	0	0	0	0	0	0	0	0	0	0	0	0	0	0	0	0	0	0	0	0	0	0	0	0	0	0	0	3.11618e-05
ko:K07251	0	0.0152581	0	0	0	0	0	0	0	0	0	0	0	0	0	0	0	0	0	0.001897	0	0	0	0	0	0	0	0	0	0	0	0	0	0	0	0	0	0	0.00027504	0	0	0	0	0	0	0	0	0	0
ko:K00096	0	0.000660776	0	0	0	0	0	0	0	0	0	0	0	0	0.000604148	0	0	0.000304109	0	0.00288859	0	0	0	0.00335887	0	0	0	0.000137658	0	0	0	0	0	0	0	0	0	0	0	0.0019262	0	0	0	0	0.00137313	0	0.000250135	0	0
ko:K03638	0	0	0	0	0	0	0	0	0	0	0.00122294	0	0.00134504	0	0	0	0	0	0	4.40418e-05	0	0	0	0	0	0	0	0	0	0.00087673	0	0	0	0.000419835	0	0	0	0	0	0	0	0	0	0	0	0	0	0	0
ko:K14379	0	0	0.01244	0	0	0	0	0.0061332	0	0	0	0	0	0	0.00196327	0	0	0	0	0	0	0	0	0	0	0	0	0	0	0	0	0	0.00146043	0	0	0	0.00115607	0	0.000464429	0	0	0.000134972	0	0	0	0	0.00114943	0	0
ko:K00568	0	0.0335561	0	0	0	0.00291441	0	0	0	0	0	0	0	0	0	0	0	0	0	0.0165578	0.0194726	0	0	0	0	0	0	0	0	0	0	0	0	0	0	0	0	0	0	0	0	0	0	0.000580506	0	0	0	0	0
ko:K00823	0	0.00239189	0	0	0	0	0	0	0	0.0142656	0	0	0	0	0	0	0	0.00666416	0	0.0100851	0	0	0	0	0	0	0	0	0	0	0	0	0	0	0	0	0	0	0	0.000221646	0.0050049	0	0	0	0.000138684	0	0	0	0
ko:K20446	0	0	0	0	0	0	0	0	0	0	0	0	0	0	0	0	0	0	0	0	0	0	0	0	0	0	0	0	0	0	0	0	0	0	0	0	0	0	0	0	0	0	0	0	0	0	0	0	0
ko:K13853	0	0	0	0	0	0	0	0	0	0	0	0	0	0	0	0	0	0	0	0	0	0	0	0.000102007	0	0	0.000422143	1.18345e-06	0	0	0	0	0	0	0	0	0	0	0	0	0	0	0	0	1.56427e-05	0	0	0	0
ko:K03182	0	0.000340667	0	0	0	0	0	0	0	0	0	0	0	0	0	0	0	0.00682398	0	0.00291334	0.00216507	0.00321023	0	0.0019128	0	0	0	0	0	0	0	0.00142665	0	0	0	0	0	0.000519169	0	5.94271e-05	0	0	0.00167464	0	0	0.00400145	0	0	0
ko:K03179	0	9.75418e-05	0	0	0	0	0	0	0	0	0	0	0	0	0	0	0	0.00298221	0	0.00264855	0	0	0	0	0	0	0	0	0	0	0	0	0	0	0	0	0	0	0	0	0	0	0.000817891	0	0	0	0	0	0
ko:K00699	0	0	0	0	0	0	0	0	0	0	0	0	0	0	0	0	0	0	0	0	0	0	0	2.73056e-06	0	0	0	0	0	0	0	0	0	0	0	0	0	0	0	0	0	0	0	0	0	0	0	0	0
ko:K01117	0	0	0	0	0	0	0	0	0	0	0	0	0	0	0	0	0	0	0	0	0	0	0	0	0	0.00409987	0	0	0	0	0	0	0	0	0	0	0	0	0	0	0	0	0	0	0	0	0	0	0
ko:K04628	0	0	0	0	0	0	0	0	0	0	0	0	0	0	0	0	0	0	0	0	0	0	0	2.73056e-06	0	0	0	0	0	0	0	0	0	0	0	0	0	0	0	0	0	0	0	0	0	0	0	0	0
ko:K04019	0	5.47293e-05	0	0	0	0	0	0	0	0	0.0034298	0	0	0	0	0	0	0	0	0	0	0	0	0	0	0	0	0	0	0	0	0	0	0	0	0	0	0	0	0	0	0	0	0	0	0	0	0	0
ko:K03735	0	0	0	0	0	0	0	0	0	0	0.00386329	0	0	0	0	0	0	0	0	0.00183188	0	0	0	0	0	0	0	0	0	0	0	0	0	0	0	0	0	0	0	0	0	0	0	0	0	0	0	0	0
ko:K03736	0	0.00687797	0	0	0	0	0	0	0	0	0.00231911	0	0	0	0	0	0	0	0	0.00114036	0	0	0	0	0	0	0	0	0	0	0	0	0	0	0	0	0	0	0	0	0	0	0	0	0	0	0	0	0
ko:K10811	0	0	0	0	0	0	0	0	0	0	0	0	0.00272098	0	0	0	0	0	0	0	0	0	0	0	0	0	0	0	0	0	0	0	0	0	0	0	0	0	0	0	0	0	0	0	9.17052e-05	0	0	0	0
ko:K03472	0	0.00697628	0	0	0	0	0	0	0	0	0	0	2.65538e-05	0	0	0	0	0	0	0.000870798	0	0	0	0	0	0	0	0	0	0	0	0	0	0	0	0	0	0	0	0	0	0	0	0	0	0	0	0	0
ko:K20967	0	0	0	0	0	0	0	0.000413856	0	0	0	0	0	0	1.48237e-05	0	0	0	0	0	0.000914847	0	0	0	0	0	0	0	3.9534e-05	0	0	0	0	0	0	0	0	0	7.10254e-05	0	0	7.58724e-05	0	0	0	0	0	0	0
ko:K00835	0	0.0160948	0	0	0	0	0	0	0	0	0	0	0	0	0	0	0	0	0	0.000187173	0	0	0	0	0	0	0	0	0	0	0	0	0	0	0	0	0	0	0	0	0	0.00030463	0	0	0	0	0	0	5.12462e-05
ko:K00185	0	0	0	0	0	0	0	0	0	0	0	0	0	0	0	0	0	0	0	0	0	0	0	0	0	0	0	0	0	0	0	0	0	0	0	0	0	0	0	0	0	0	0	0	0	0	0	0	2.34302e-05
ko:K00184	0	0.0120984	0	0	0	0	0	0	0	0	0	0	0	0	0	0	0	0	0	0	0	0	0	0	0	0	0	0	0	0	0	0	0	0	0	0	0	0	0	0	0	0	0	0	0	0	0	0	0.000767836
ko:K00332	0	0	0	0	0	0	0	0	0	0	0	0	0	0	0	0	0	0	0	0	0	0	0	0	0	0	0	0	0	0	0	0	0	0	0	0	0	0	0	0	0	0	0.000670704	0	0	0	0	0	0
ko:K01134	0	0	0	0	0	0	0	0	0	0	0	0	0	0	0	0	0	0	0	0	0	0	0	0	0	0	0	0	0	0	0	0	0	0	0	0	0	0	0	0	0	0	0	0	0	0	0	0	0
ko:K00500	0	0	0	0	0	0	0	0	0	0	0	0	0	0	0	0	0	0	0	0	0	0	0	0	0	0	0	0	0	0	0	0	0	0	0	0	0	0	0	0	0	0	0	0	0	0	0	0	0
ko:K00453	0	0	0	0	0	0	0	0	0	0	0	0	0	0	0	0	0	0	0	0	0	0	0	0	0	0	0	0	0	0	0	0	0	0	0	0	0	0	0	0	0	0	0	0	0	0	0	0	0
ko:K01114	0	0	0	0	0	0	0	0	0	0	0	0	0	0	0	0	0	0	0	0	0	0	0	0	0	0	0	0	0	0	0	0	0	0	0	0	0	0	0	0	0	0	0	0	0	0	0	0	0
ko:K14268	0	0.00795206	0	0	0	0	0	0	0	0	0	0	0	0	0	0	0	0	0	0.0027589	0	0	0	0	0	0	0	0	0	0	0	0	0	0	0	0	0	0	0	0	0	0	0	0	0	0	0	0	0
ko:K00135	0.0407443	0.000822206	0	0.000503117	0	0	0	0	0	0.00645919	0	0	0	0	0	0	0.00273725	0	0.00206918	0.00229676	0	0.00151408	0	0	0	0	0	0	0	0	0	0	0	0	0	1.12807e-05	0	0.00114981	0	0	0.000206013	0	0	0	0	0	0	0.000577604	0
ko:K03153	0	0	0	0	0	0	0	0	0	0	0	0	0	0	0	0	0	0	0	0	0	0	0	0	0	0	0	0	0	0	0	0	0	0	0	0	0	0	0	0	0	0	0	0	0	0	0	0	0
ko:K00299	0	0.0031329	0	0	0	0	0	0	0	0	0	0	0	0	0	0	0	0	0	0.000245677	0	0	0	0	0	0	0	0	0	0	0	0	0	0	0	0	0	9.9132e-06	0	0	0	0	0	0	0	0	0	0	0
ko:K00011	0	0	0	0	0	0	0	0	0	0	0	0	0	0	0	0	0	0	0	0	0	0	0	0	0	0	0	0	0	0	0	0	0	0	0	0	0	0	0	0	0	0	0	0	0	0	0	0	0
ko:K05577	0	0	0	0	0	0	0	0	0	0	0	0	0	0	0	0	0	0	0	0	0	0	0	0	0	0	0	0	0	0	0	0	0	0	0	0	0	0	0	0	0	0	0	0	0	0	0	0	0
ko:K03185	0	0.000977236	0	0	0	0	0	0	0	0	0	0	0	0	0	0	0	0	0	0.00643146	0	0	0	0	0	0	0	0	0	0	0	0	0	0	0	0	0	0	0	0	0	0	0	0	0	0	0	0	0
ko:K06134	0	0	0	0	0	0	0	0	0	0	0	0	0	0	0	0	0	0	0	0	0	0	0	0	0	0	0	0	0	0	0	0	0	0	0	0	0	0	0	0	0	0	0	0	0	0	0	0	0
ko:K03181	0	0	0	0	0	0	0	0	0	0	0	0	0	0	0	0	0	0	0	0.00554647	0	0	0	0	0	0	0	0	0	0	0	0	0	0	0	0	0	0	0	0	0	0	0	0	0	0	0	0	0
ko:K00507	0	0	0	0	0	0	0	0	0	0	0	0	0	0	0	0	0	0	0	0	0	0	0	0	0	0	0	0	0	0	0	0	0	0	0	0	0	0	0	0	0	0	0	0	0	0	0	0	0
ko:K10810	0	0	0	0	0	0	0	0	0	0	0.00158972	0	0	0	0	0	0	0	0	0	0	0	0	0	0	0	0	0	0	0	0	0	0	0	0	0	0	0	0	0	0	0	0	0	0	0	0	0	0
ko:K18974	0.00337442	0.0116341	0	0	0	0	0	0	0	0	0	0	0	0	0.00024591	0	0	0	0	0.000829705	0	0	0.000287783	0	0	0	0	0	0.000507647	0	0	0	0	0	0	0	0	0	0	0	0	0	0	0	0	0	0.000129665	0	0.000327407
ko:K22393	0	0	0	0	0	0	0	0	0	0.00421484	0	0	0	0	0	0	0	0	0	0	0	0	0	0	0	0	0	0	0	0	0	0	0	0	0	0	0	0.000593146	0	0	0.00209073	0	0	0	0	0	0	0	0
ko:K22394	0	0	0	0	0	0	0	0	0	0.00414216	0	0	0	0	0	0	0.0010877	0	0.00116266	0	0	0.000177055	0	0	0	0	0	0	0	0	0	0	0	0	0	0	0	0.000622504	0	0	0.00106007	0	0	0	0	0	0	0	0
ko:K19965	0	0	0	0	0	0	0	0	0	0	0	0	0	0	0	0	0	0	0	0	0	0	0	0	0	0	0	0	0	0	0	0	0	0	0	0	0	0	0	0	0	0	0	0	0	0	0	0	0
ko:K22391	0	0.000424695	0	0	0	0	0	0	0	0	0	0	0	0	0	0	0	0	0	0	0	0	0	0	0	0	0	0	0	0	0	0	0	0	0	0	0	0	0	0	0	0	0.000802657	0	0	0	0	0	0
ko:K10774	0	0	0	0	0	0	0	0	0	0	0	0	0	0	0	0	0	0	0	0	0	0	0	0	0	0	0	0	0.00193242	0	0	0	0	0	0	0	0	0	0	0	0	0	0	0	0	0	0	0	0
ko:K17108	0	0	0	0	0	0	0	0	0	0	0	0	0	0	0	0	0	0	0	0	0	0	0	0	0	0	0	0	5.3628e-05	0	0	0	0	0	0	0	0	0	0	0	0	0.0037177	0	0	0	0	0	0	0
ko:K15226	0	0	0	0	0	0	0	0	0	0	0	0	0	0	0	0	0	0	0	0	0	0	0	0	0	0	0	0	0	0	0	0	0	0	0	0	0	0	0	0	0	0	0	0	0	0	0	0	0
ko:K06208	0	0	0	0	0	0	0	0	0	0	0	0	0	0	0	0	0	0.000797482	0	0	0	0	0	0	0	0	0	0	0	0	0	0	0	0	0	0	0	0	0	0	0	0	0	0	0	0	0	0	0
ko:K08352	0	0.00226466	0	0	0	0	0	0	0	0	0	0	0	0	0	0	0	0	0	0	0	0	0	0	0	0	0	0	0	0	0	0	0	0	0	0	0	0	0	0	0	0	0	0	0	0.0286181	0	0	0
ko:K18590	0	0.000646752	0	0	0	0	0	0	0	0	0	0	0	0	0	0	0	0	0	0	0	0	0	0	0	0	0	0	0	0	0	0	0	0	0	0	0	0	0	0	0	0	0	0	0	0	0	0	0
ko:K21064	0.00550398	0	0	0	0	0	0	0	0	0.00261855	0	0	0	0.00254282	0	0.00241411	0.0016164	0	0.00143874	0	0	0.000925351	0	0	0	0	0	0	0	0	0.000788131	0	0	0	0	0	3.57767e-07	0	0	0	0.000691547	0	0	0	0	0	0	0.000486818	0
ko:K00105	0	0	0	0	0	0	0	0	0	0	0	0	0	0	0	0	0	0	0	0	0	0	0	0	0	0	0	0	0	0	0	0	0	0	0	0	0	0	0	0	0	0	0	0	0	0	0	0	0
ko:K00720	0	0	0	0	0	0	0	0	0	0	0	0	0	7.42134e-06	0	1.97107e-05	0	0	0	0	0	0	0	0	0	0	0	0	0	0	0.000339049	0	0	0	0	0	0	0	0	0	0	0	0	0	0	0	0	0	0
ko:K12152	0	0.000795125	0	0	0	0	0	0	0	0	0	0	0	0	0	0	0	0	0	0.00136047	0	0	0	0	0	0	0	0	0	0	0	0	0	0	0	0	0	0	0	0	0	0	0	0	0	0	0	0	0
ko:K13953	0	0.00462117	0	0	0	0	0	0	0	0	0	3.92083e-05	0	0.00219203	0	0.00222378	0	0	0	0	0	0	0	0	0	0.000865817	0	0	0	0	0.000501811	0	0	0	0	0	0	0	0	0	0.00254071	0	0	0	0	0	0	0	0
ko:K05576	0	0	0	0	0	0	0	0	0	0	0	0	0	0	0	0	0	0	0	0	0	0	0	0	0	0	0	0	0	0	0	0	0	0	0	0	0	0	0	0	0	0	0	0	0	0	0	0	0
ko:K00263	0	0	0	0	0	0	0	0	0	0	0	0	0	0	0	0	0	0	0	0	0	0	0	0	0	0	0	0	0	0	0	0	0	0	0	0	0	0	0	0	0	0	0	0	0	0	0	0	0
ko:K18933	0	0	0	0	0	0	0	0	0	0	0	0	0	0	0	0	0	0	0	0	0	0	0	0	0	0	0	0	0	0	0	0	0	0	0	0	0	0	0	0	0	0	0	0	0	0	0	0	0
ko:K11781	0	0	0	0	0	0	0	0	0	0	0	0	0	0	0	0	0	0	0	0	0	0	0	0	0	0	0	0	0	0	0	0	0	0	0	0	0	0	0	0	0	0	0	0	0	0	0	0	0
ko:K04093	0	0	0	0	0	0	0	0	0	0	0	0	0	0.0213204	0	0.0674301	0	0	0	0	0	0	0	0	0	0	0	0	0	0	0.0125533	0	0	0	0	0	0	0	0	0	0	0	0	0	0	0	0	0	0
ko:K07732	0	0	0	0	0	0	0	0	0	0	0	0	0	0	0	0	0	0	0	0	0	0	0	0	0	0	0	0	0	0	0	0	0	0	0	0	0	0	0	0	0	0	0	0	0	0	0	0	0
ko:K14653	0	0	0	0	0	0	0	0	0	0	0	0	0	0	0	0	0	0	0	0	0	0	0	0	0	0	0	0	0	0	0	0	0	0	0	0	0	0	0	0	0	0	0	0	0	0	0	0	0
ko:K14656	0	0	0	0	0	0	0	0	0	0	0	0	0	0	0	0	0	0	0	0	0	0	0	0	0	0	0	0	0	0	0	0	0	0	0	0	0	0	0	0	0	0	0	0	0	0	0	0	0
ko:K08096	0	0	0	0	0	0	0	0	0	0	0	0	0	0	0	0	0	0	0	0	0	0	0	0	0	0	0	0	0	0	0	0	0	0	0	0	0	0	0	0	0	0	0	0	0	0	0	0	0
ko:K18853	0	0	0	0	0	0	0	0	0	0	0	0	0	0	0	0	0	0	0	0	0	0	0	0	0	0	0	0	0	0	0	0	0	0	0	0	0	0	0	0	0	0	0	0	0	0	0	0	0
ko:K17488	0	0	0	0	0	0	0	0	0	0	0	0	0	0	0	0	0	0	0	0	0	0	0	0	0	0	0	0	0	0	0	0	0	0	0	0	0	0	0	0	0	0	0	0	0	0	0	0	0
ko:K06984	0	0	0	0	0	0	0	0	0	0	0	0	0	0	0	0	0	0	0	0	0	0	0	0	0	0	0	0	0	0	0	0	0	0	0	0	0	0	0	0	0	0	0	0	0	0	0	0	0
ko:K07142	0	0	0	0	0	0	0	0	0	0	0	0	0	0	0	0	0	0	0	0	0	0	0	0	0	0	0	0	0	0	0	0	0	0	0	0	0	0	0	0	0	0	0	0	0	0	0	0	0
ko:K17105	0	0	0	0	0	0	0	0	0	0	0	0	0	0	0	0	0	0	0	0	0	0	0	0	0	0	0	0	0	0	0	0	0	0	0	0	0	0	0	0	0	0	0	0	0	0	0	0	0
ko:K19665	0	0	0	0	0	0	0	0	0	0	0	0	0	0	0	0	0	0	0	0	0	0	0	0	0	0	0	0	0	0	0	0	0	0	0	0	0	0	0	0	0	0	0	0	0	0	0	0	0
ko:K19664	0	0	0	0	0	0	0	0	0	0	0	0	0	0	0	0	0	0	0	0	0	0	0	0	0	0	0	0	0	0	0	0	0	0	0	0	0	0	0	0	0	0	0	0	0	0	0	0	0
ko:K17104	0	0	0	0	0	0	0	0	0	0	0	0	0	0	0	0	0	0	0	0	0	0	0	0	0	0	0	0	0	0	0	0	0	0	0	0	0	0	0	0	0	0	0	0	0	0	0	0	0
ko:K13941	0.00185878	0.00720123	0	0	0	0	0	0	0	0	0	0	0	0	0.000272694	0	0	0	0	0	0	0	0	0	0	0	0	0	0.000562939	0	0	0	0	0	0	0	0	0	0	0	0	0	0	0	0	0	0.000143787	0	0.000363067
ko:K18824	0.00185305	0.00717902	0	0	0	0	0	0	0	0	0	0	0	0	0.000271853	0	0	0	0	0	0	0	0	0	0	0	0	0	0.000561203	0	0	0	0	0	0	0	0	0	0	0	0	0	0	0	0	0	0.000143344	0	0.000361947
ko:K13503	0	0.00732389	0	0	0	0	0	0	0	0	0	0	0	0	0	0	0	0	0	0.000334034	0	0	0	0	0	0	0	0	0	0	0	0	0	0	0	0	0	0	0	0	0	0	0	0	0	0	0	0	0.000123642
ko:K00274	0	0	0	0	0	0	0	0	0	0	0	0	0	0	0	0	0	0	0	0.000136098	0	0	0	0	0	0	0	0	0	0	0	0	0	0	0	0	0	0	0	0	0	0	0	0	0	0	0	0	0
ko:K05368	0	0	0	0	0	0	0	0	0	0	0	0	0	0	0	0	0	0	0	0.0105802	0	0	0	0	0	0	0	0	0	0	0	0	0	0	0	0	0	0	0	0	0	0	0	0	0	0	0	0	0
ko:K01498	0	0.0122147	0	0	0	0	0	0	0	0	0	0	0	0	0	0	0	0	0	0.00114862	0	0	0	0	0	0	0	0	0	0	0	0	0	0	0	0	0	0	0	0	0	0	0	0	0	0	0	0	0
ko:K01851	0	0.0382294	0	0	0	0	0	0	0	0	0	0	0	0	0	0	0	0	0	0.0413648	0	0	0	0	0	0	0	0	0	0	0	0	0	0	0	0	0	0	0	0	0	0	0	0	0	0	0	0	0
ko:K03184	0	0.00190305	0	0	0	0	0	0	0	0	0	0	0	0	0	0	0	0	0	0.00559043	0	0	0	0	0	0	0	0	0	0	0	0	0	0	0	0	0	0	0	0	0	0	0	0	0	0	0	0	0
ko:K18800	0	0.000367309	0	0	0	0	0	0	0	0	0	0	0	0	0	0	0	0	0	0.0118679	0	0	0	0	0	0	0	0	0	0	0	0	0	0	0	0	0	0	0	0	0	0	0	0	0	0	0	0	0
ko:K00508	0	0.000502858	0	0	0	0	0	0	0	0	0	0	0	0	0	0	0	0	0	0	0	0	0	0	0	0	0	0	0	0	0	0	0	0	0	0	0	0	0	0	0	0	0	0	0	0	0	0	0
ko:K01521	0	0.00850461	0	0	0	0	0	0	0	0	0	0	0	0	0	0	0	0	0	0.00101672	0	0	0	0	0	0	0	0	0	0	0	0	0	0	0	0	0	0	0	0	0	0	0	0	0	0	0	0	0
ko:K00276	0	0.0106458	0	0	0	0	0	0	0	0	0	0	0	0	0	0	0	0	0	0.00242924	0	0	0	0	0	0	0	0	0	0	0	0	0	0	0	0	0	0	0	0	0	0	0	0	0	0	0	0	0
ko:K21142	0	0	0	0	0	0	0	0	0	0	0	0	0	0	0	0	0	0	0	0	0	0	0	0	0	0	0	0	0	0	0	0	0	0	0	0	0	0	0	0	0	0	0	0	0	0	0	0	0
ko:K07094	0	0	0	0	0	0	0	0	0	0	0	0	0	0	0	0	0	0	0	0	0	0	0	0	0	0	0	0	0	0	0	0	0	0	0	0	0	0	0	0	0	0	0	0	0	0	0	0	0
ko:K12349	0	0	0	0	0	0	0	0	0	0	0	0	0	0	0	0	0	0	0	0	0	0	0	0	0	0	0	0	0	0	0	0	0	0	0	0	0	0	0	0	0	0	0	0	0	0	0	0	0
ko:K00591	0	0	0	0	0	0	0	0	0	0	0	0	0	0	0	0	0	0	0	0	0	0	0	0	0	0	0	0	0	0	0	0	0	0	0	0	0	0	0	0	0	0	0	0	0	0	0	0	0
ko:K21219	0	0	0	0	0	0	0	0	0	0	0	0	0	0	0	0	0	0	0	0	0	0	0	0	0	0	0	0	0	0	0	0	0	0	0	0	0	0	0	0	0	0	0	0	0	0	0	0	0
ko:K03792	0	0	0	0	0	0	0	0	0	0	0	0	0	0	0	0	0	0	0	0	0	0	0	0	0	0	0	0	0	0	0	0	0	0	0	0	0	0	0	0	0	0	0	0	0	0	0	0	0
ko:K04748	0	0	0	0	0	0	0	0	0	0	0	0	0	0	0	0	0	0	0	0	0	0	0	0	0	0	0	0	0	0	0	0	0	0	0	0	0	0	0	0	0	0	0	0	0	0	0	0	0
ko:K06900	0	0	0.0029315	0	0	0	0	0	0	0	0	0	0	0	3.68646e-05	0	0	0	0	7.03007e-05	0	0	0	0	0	0	0	0	2.57586e-05	0	0	0	0	0	0	0	0.000178531	0	0.00016305	0	0	0	0	0	0	0	0	0	0
ko:K20895	0	0	0	0	0	0	0	0	0	0	0	0	0	0	0	0	0	0	0	0	0	0	0	0	0	0	0	0	0	0	0	0	0	0	0	0	0	0	0	0	0	0	0	0	0	0	0	0	0
ko:K00613	0	0	0	0	0	0	0	0	0	0	0	0	0	0	0	0	0	0	0	0	0	0	0	0	0	0	0	0	0	0	0	0	0	0	0	0	0	0	0	0	0	0	0	0	0	0	0	0	0
ko:K08351	0	0.143493	0	0	0	0	0	0	0	0	0	0	0	0	0	0	0	0	0	0.026792	0	0	0	0	0	0	0	0	0	0	0	0	0	0	0	0	0	0	0	0	0	0	0	0	0	0	0	0	0
ko:K14266	0	0	0	0	0	0	0	0	0	0	0	0	0	0	0	0	0	0	0	0	0	0	0	0	0	0	0	0	0	0	0	0	0	0	0	0	0	0	0	0	0	0	0	0	0	0	0	0	0
ko:K07589	0	0.00180407	0	0	0	0	0	0	0	0	0	0	0	0	0	0	0	0	0	0.000120993	0	0	0	0	0	0	0	0	0	0	0	0	0	0	0	0	0	0	0	0	0	0	0	0	0	0	0	0	0
ko:K03793	0	0.00647804	0	0	0	0	0	0	0	0	0	0	0	0	0	0	0	0	0	0.000936226	0	0	0	0	0	0	0	0	0	0	0	0	0	0	0	0	0	0	0	0	0	0	0	0	0	0	0	0	0
ko:K15734	0	0	0	0	0	0	0	0	0	0	0	0	0	5.9774e-06	0	2.72332e-06	0	0	0	0	0	0	0	0	0	0	0	0	0	0	0.000216017	0	0	0	0	0	0	0	0	0	0	0	0	0	0	0	0	0	0
ko:K17717	0	0	0	0	0	0	0	0	0	0	0	0	0	0	0	0	0	0	0	0	0	0	0	0	0	0	0	0	0	0	0	0	0	0	0	0	0	0	0	0	0	0	0	0	0	0	0	0	0
ko:K00650	0	0	0	0	0	0	0	0	0	0	0	0	0	0	0	0	0	0	0	0	0	0	0	0	0	0	0	0	0	0	0	0	0	0	0	0	0	0	0	0	0	0	0	0	0	0	0	0	0
ko:K05587	0	0	0	0	0	0	0	0	0	0	0	0	0	0	0	0	0	0	0	0	0	0	0	0	0	0	0	0	0	0	0	0	0	0	0	0	0	0	0	0	0	0	0	0	0	0	0	0	0
ko:K09516	0	0	0	0	0	0	0	0	0	0	0	0	0	0	0	0	0	0	0	0	0	0	0	0	0	0	0	0	0	0	0	0	0	0	0	0	0	0	0	0	0	0	0	0	0	0	0	0	0
ko:K20448	0	0	0	0	0	0	0	0	0	0	0	0	0	0	0	0	0	0	0	0	0	0	0	0	0	0	0	0	0	0	0	0	0	0	0	0	0	0	0	0	0	0	0	0	0	0	0	0	0
ko:K20445	0	0	0	0	0	0	0	0	0	0	0	0	0	0	0	0	0	0	0	0	0	0	0	0	0	0	0	0	0	0	0	0	0	0	0	0	0	0	0	0	0	0	0	0	0	0	0	0	0
ko:K08324	0	5.66369e-07	0	0	0	0	0	0	0	0	0	0	0	0	0	0	0	0	0	0.00421583	0	0	0	0	0	0	0	0	0	0	0	0	0	0	0	0	0	0	0	0	0	0	0	0	0	0	0	0	0
ko:K03782	0	0	0	0	0	0	0	0	0	0	0	0	0	0	0	0	0	0	0	6.57195e-06	0	0	0	0	0	0	0	0	0	0	0	0	0	0	0	0	0	0	0	0	0	0	0	0	0	0	0	0	0
ko:K09470	0	0.00288403	0	0	0	0	0	0	0	0	0	0	0	0	0	0	0	0	0	0.00438041	0	0	0	0	0	0	0	0	0	0	0	0	0	0	0	0	0	0	0	0	0	0	0	0	0	0	0	0	0
ko:K00117	0	0.0287451	0	0	0	0	0	0	0	0	0	0	0	0	0	0	0	0	0	0.0111528	0	0	0	0	0	0	0	0	0	0	0	0	0	0	0	0	0	0	0	0	0	0	0	0	0	0	0	0	0
ko:K00466	0	0	0	0	0	0	0	0	0	0	0	0	0	0	0	0	0	0	0	0	0	0	0	0	0	0	0	0	0	0	0	0	0	0	0	0	0	0	0	0	0	0	0	0	0	0	0	0	0
ko:K21795	0	0	0	0	0	0	0	0	0	0	0	0	0	0	0	0	0	0	0	0	0	0	0	0	0	0	0	0	0	0	0	0	0	0	0	0	0	0	0	0	0	0	0	0	0	0	0	0	0
ko:K18589	0	0.00713402	0	0	0	0	0	0	0	0	0	0	0	0	0	0	0	0	0	0	0	0	0	0	0	0	0	0	0	0	0	0	0	0	0	0	0	0	0	0	0	0	0	0	0	0	0	0	0.000239309
ko:K16619	0	0	0	0	0	0	0	0	0	0	0	0	0	0	0	0	0	0	0	0	0	0	0	0	0	0	0	0	0	0	0	0	0	0	0	0	0	0	0	0	0	0	0	0	0	0	0	0	0
ko:K04718	0	0	0	0	0	0	0	0	0	0	0	0	0	0	0	0	0	0	0	0	0	0.00107797	0	0	0	0	0	0	0	0	0	0	0	0	0	0	0	0	0	0	0	0	0	0	0	0	0	0.000557794	0
ko:K21220	0	0	0	0	0	0	0	0	0	0	0	0	0	0	0	0	0	0	0	0	0	0	0	0	0	0	0	0	0	0	0	0	0	0	0	0	0	0	0	0	0	0	0	0	0	0	0	0	0
ko:K01202	0	0	0	0	0	0	0	0	0	0	0	0	0	0	0	0	0	0	0	0	0	0	0	0	0	0	0	0	0	0	0	0	0	0	0	0	0	0	0	0	0	0	0	0	0	0	0	0	0
ko:K05575	0	0	0	0	0	0	0	0	0	0	0	0	0	0	0	0	0	0	0	0	0	0	0	0	0	0	0	0	0	0	0	0	0	0	0	0	0	0	0	0	0	0	0	0	0	0	0	0	0
ko:K06128	0	0	0	0	0	0	0	0	0	0	0	0	0	0	0	0	0	0	0	0	0	0	0	0	0	0	0	0	0	0	0	0	0	0	0	0	0	0	0	0	0	0	0	0	0	0	0	0	0
ko:K12254	0	0	0	0	0	0	0	0	0	0	0	0	0	0	0	0	0	0	0	0	0	0	0	0	0	0	0	0	0	0	0	0	0	0	0	0	0	0	0	0	0	0	0	0	0	0	0	0	0
ko:K00137	0	0.00740025	0	0	0	0	0	0	0	0	0	0	0	0	0	0	0	0	0	0.00127304	0	0	0	0	0	0	0	0	0	0	0	0	0	0	0	0	0	0	0	0	0	0	0	0	0	0	0	0	0
ko:K09473	0	0.00138603	0	0	0	0	0	0	0	0	0	0	0	0	0	0	0	0	0	0.00336171	0	0	0	0	0	0	0	0	0	0	0	0	0	0	0	0	0	0	0	0	0	0	0	0	0	0	0	0	0
ko:K13938	0	0.00707901	0	0	0	0	0	0	0	0	0	0	0	0	0	0	0	0	0	0.00102308	0	0	0	0	0	0	0	0	0	0	0	0	0	0	0	0	0	0	0	0	0	0	0	0	0	0	0	0	0
ko:K00232	0	0	0	0	0	0	0	0	0	0	0	0	0	0	0	0	0	0	0	0	0	0	0	0	0	0	0	0	0	0	0	0	0	0	0	0	0	0	0	0	0	0	0	0	0	0	0	0	0
ko:K13622	0	0	0	0	0	0	0	0	0	0	0	0	0	0	0	0	0	0	0	0	0	0	0	0	0	0	0	0	0	0	0	0	0	0	0	0	0	0	0	0	0	0	0	0	0	0	0	0	0
ko:K20447	0	0	0	0	0	0	0	0	0	0	0	0	0	0	0	0	0	0	0	0	0	0	0	0	0	0	0	0	0	0	0	0	0	0	0	0	0	0	0	0	0	0	0	0	0	0	0	0	0
ko:K12255	0	0	0	0	0	0	0	0	0	0	0	0	0	0	0	0	0	0	0	0.0129029	0	0	0	0	0	0	0	0	0	0	0	0	0	0	0	0	0	0	0	0	0	0	0	0	0	0	0	0	0
ko:K08354	0	0.00329933	0	0	0	0	0	0	0	0	0	0	0	0	0	0	0	0	0	0	0	0	0	0	0	0	0	0	0	0	0	0	0	0	0	0	0	0	0	0	0	0	0	0	0	0	0	0	0
ko:K08353	0	0	0	0	0	0	0	0	0	0	0	0	0	0	0	0	0	0	0	0	0	0	0	0	0	0	0	0	0	0	0	0	0	0	0	0	0	0	0	0	0	0	0	0	0	0	0	0	0
ko:K17364	0	0	0	0	0	0	0	0	0	0	0	0	0	0	0	0	0	0	0	0	0	0	0	0	0	0	0	0	0	0	0	0	0	0	0	0	0	0	0	0	0	0	0	0	0	0	0	0	0
ko:K04719	0	0	0	0	0	0	0	0	0	0	0	0	0	0	0	0	0	0	0	0	0	0	0	0	0	0	0	0	0	0	0	0	0	0	0	0	0	0	0	0	0	0	0	0	0	0	0	0	0
ko:K01593	0	0	0	0	0	0	0	0	0	0	0	0	0	0	0	0	0	0	0	0	0	0	0	0	0	0	0	0	0	0	0	0	0	0	0	0	0	0	0	0	0	0	0	0	0	0	0	0	0
ko:K13621	0	0	0	0	0	0	0	0	0	0	0	0	0	0	0	0	0	0	0	0	0	0	0	0	0	0	0	0	0	0	0	0	0	0	0	0	0	0	0	0	0	0	0	0	0	0	0	0	0
ko:K22099	0	0	0	0	0	0	0	0	0	0	0	0	0	0	0	0	0	0	0	0	0	0	0	0	0	0	0	0	0	0	0	0	0	0	0	0	0	0	0	0	0	0	0	0	0	0	0	0	0
[truncated: 558 more columns]
