# Supplementary material for: Ancestral trajectory of infant gut microbiome assembly in non-industrialised populations
Source: Research Square preprint supplement (doi:10.21203/rs.3.rs-6675732/v1), 2025-05-30
Supplement: Supplementary file 4 [file 6499636b4726f5d795c45b8e.xlsx]

## Sheet: Sheet1
UHGP90 gene orthologue	Diet component	Pearson coefficient	p-value	q-value	Names	Enzyme commision (EC) numbers	CAZy families
MGYG000100949_00483	food_porridge_pulp_adm	5.42993	6.91282e-56	1.42922e-53		3.2.1.21	GH3
MGYG000169792_01006	food_porridge_pulp_adm	3.19968	1.63913e-49	5.46369e-43	ompC	2.4.1.10; 3.5.1.28	GH68
MGYG000034388_01636	food_porridge_pulp_adm	3.13996	2.74739e-49	1.20885e-42	malQ	2.4.1.25	GH77
MGYG000031614_00197	food_porridge_pulp_adm	3.02967	7.62372e-49	5.73618e-42		2.4.1.337	GT4
MGYG000030063_01002	food_porridge_pulp_adm	2.99616	1.05878e-48	9.43547e-42		3.1.1.53; 3.2.1.4	GH5; GH9
MGYG000011410_00651	food_porridge_pulp_adm	2.96178	1.49698e-48	1.59184e-41	pbpG	2.4.1.129; 3.4.16.4	GT51
MGYG000062516_02250	food_porridge_pulp_adm	2.93633	1.94682e-48	2.3642e-41	malQ	2.4.1.25	GH77
MGYG000030911_00980	food_porridge_pulp_adm	2.89571	2.99543e-48	4.51247e-41	murG	2.4.1.227	GT28
MGYG000256801_00363	food_porridge_pulp_adm	2.87858	3.60814e-48	5.96051e-41		3.1.1.53; 3.2.1.4	GH5; GH9
MGYG000126605_01801	food_porridge_pulp_adm	2.75619	1.47844e-47	4.82927e-40	celA	3.2.1.4	GH5; GH9
MGYG000213266_00385	food_porridge_pulp_adm	2.6995	2.99137e-47	1.35836e-39	tagA	2.4.1.187	GT26
MGYG000138766_00237	food_porridge_pulp_adm	2.62355	8.1302e-47	5.81692e-39		3.2.1.21	GH3
MGYG000196819_00047	food_porridge_pulp_adm	2.52285	3.40596e-46	4.55518e-38	celA	3.2.1.4	GH5; GH9
MGYG000162415_00814	food_porridge_pulp_adm	4.79914	7.81239e-46	1.48079e-37	CP_0954	4.2.2.1	PL8
MGYG000177812_00997	food_porridge_pulp_adm	2.44451	1.13884e-45	2.52046e-37		3.2.1.1; 5.4.99.16	GH13
MGYG000075866_00354	breast_feeding	5.42955	5.36804e-39	3.73487e-37	pulA	3.2.1.41	CBM48; GH13
MGYG000276855_01371	food_porridge_pulp_adm	2.42625	1.52772e-45	3.80983e-37		3.2.1.4; 3.2.1.52	GH5; GH9
MGYG000104871_00590	food_porridge_pulp_adm	2.41523	1.82838e-45	4.90187e-37		3.2.1.37	GH43
MGYG000004382_02331	food_porridge_pulp_adm	2.41384	1.87036e-45	5.06034e-37		3.2.1.4	GH5; GH9
MGYG000068569_00921	food_porridge_pulp_adm	2.41198	1.92843e-45	5.28181e-37		2.4.1.18	GH57
MGYG000188564_00270	food_porridge_pulp_adm	2.40863	2.03801e-45	5.70687e-37	murG	2.4.1.227	GT28
MGYG000004850_00501	food_porridge_pulp_adm	2.40176	2.28289e-45	6.68879e-37	mltB	5.1.3.15	GH103
MGYG000194913_00082	food_porridge_pulp_adm	2.37874	3.35843e-45	1.14637e-36		4.2.2.1	PL8
MGYG000049762_00135	food_porridge_pulp_adm	2.37673	3.4749e-45	1.2021e-36	glgA	2.4.1.21	GT5
MGYG000127417_00036	food_porridge_pulp_adm	2.35296	5.22485e-45	2.11858e-36		2.4.1.187	GT26
MGYG000284877_01468	food_porridge_pulp_adm	2.33326	7.37688e-45	3.41478e-36	amyS	3.2.1.1	GH13
MGYG000197270_01441	food_porridge_pulp_adm	2.33296	7.4158e-45	3.43969e-36		2.4.1.315; 2.4.1.46	GT28
MGYG000125951_01817	food_porridge_pulp_adm	2.28864	1.64962e-44	1.03323e-35		3.2.1.20	GH31
MGYG000162582_00024	food_porridge_pulp_adm	2.2667	2.48101e-44	1.80512e-35	malQ	2.4.1.25	GH77
MGYG000231945_00857	breast_feeding	6.08009	4.63187e-38	3.96985e-35	sacB	2.4.1.10; 2.4.1.9	GH68
MGYG000172959_01291	food_porridge_pulp_adm	2.23555	4.4934e-44	4.04861e-35	murG	2.4.1.227	GT28
MGYG000046814_01322	food_porridge_pulp_adm	2.21661	6.50378e-44	6.67741e-35	abfA	3.2.1.55	GH51
MGYG000172346_00399	food_porridge_pulp_adm	2.21639	6.5328e-44	6.71767e-35		3.2.1.1	GH13
MGYG000024275_00003	food_porridge_pulp_adm	2.21489	6.72849e-44	6.99081e-35		3.2.1.21	GH3
MGYG000056788_00197	food_porridge_pulp_adm	2.20335	8.45955e-44	9.51926e-35	tagA	2.4.1.187	GT26
MGYG000004850_01754	food_porridge_pulp_adm	2.17318	1.55751e-43	2.16018e-34		3.2.1.21	GH3
MGYG000003517_00711	food_porridge_pulp_adm	2.16252	1.94059e-43	2.89834e-34		2.4.1.20	GT36
MGYG000126757_00745	food_porridge_pulp_adm	2.14968	2.53658e-43	4.14223e-34		3.2.1.177; 3.2.1.52	GH31
MGYG000006273_00906	food_porridge_pulp_adm	2.12053	4.7163e-43	9.43403e-34		3.2.1.4	GH5; GH9
MGYG000033568_00899	food_porridge_pulp_adm	2.11108	5.78845e-43	1.23665e-33		3.2.1.78	GH26
MGYG000275915_00797	food_porridge_pulp_adm	2.1089	6.07012e-43	1.31668e-33		4.2.2.23	PL11
MGYG000275627_00528	food_porridge_pulp_adm	2.09886	7.56527e-43	1.75993e-33	murG	2.4.1.227	GT28
MGYG000004439_01457	food_porridge_pulp_adm	2.09644	7.97894e-43	1.88763e-33		3.1.3.5; 3.6.1.45; 4.2.2.2; 4.2.2.5	PL8
MGYG000032158_00798	breast_feeding	6.87834	3.69587e-37	2.94306e-33		3.2.1.18	GH33
MGYG000004128_00061	food_porridge_pulp_adm	2.07842	1.19188e-42	3.19678e-33		2.4.1.315	GT28
MGYG000199642_01317	food_porridge_pulp_adm	5.73555	1.29414e-42	3.56059e-33		3.2.1.4	GH5; GH9
MGYG000198124_01152	food_porridge_pulp_adm	2.06038	1.79371e-42	5.45456e-33	vpr	2.7.11.1; 3.1.3.90; 3.1.4.12; 3.2.1.4; 3.2.1.8; 3.2.1.81; 3.2.1.82; 3.4.16.4; 3.4.21.96	GH28; GH5; GH9
MGYG000108875_01598	food_porridge_pulp_adm	2.00963	5.88925e-42	2.54678e-32		3.2.1.26	GH32
MGYG000271880_00599	food_porridge_pulp_adm	2.00815	6.10212e-42	2.66595e-32		3.2.1.18	GH33
MGYG000213854_00079	food_porridge_pulp_adm	1.99054	9.35134e-42	4.61342e-32	surA	2.4.1.129; 3.4.16.4	GT51
MGYG000078501_01546	food_porridge_pulp_adm	1.99008	9.45865e-42	4.68138e-32	lacZ	3.2.1.23; 3.2.1.52	GH20
MGYG000027582_00906	food_porridge_pulp_adm	1.96501	1.7597e-41	1.03462e-31		3.2.1.1	GH13
MGYG000119460_01155	food_porridge_pulp_adm	1.96337	1.83343e-41	1.09011e-31	glgA	2.4.1.21	GT5
MGYG000097957_00294	food_porridge_pulp_adm	1.91708	6.02013e-41	4.90305e-31		3.2.1.21; 3.2.1.52	GH3
MGYG000231149_00541	food_porridge_pulp_adm	1.90312	8.70801e-41	7.78991e-31		3.2.1.24	GH38
MGYG000247020_00133	food_porridge_pulp_adm	1.90219	8.92636e-41	8.03515e-31		3.2.1.177; 3.2.1.52	GH31
MGYG000031338_00715	breast_feeding	5.06336	7.95809e-36	1.2275e-30	dex	3.2.1.11	GH66
MGYG000043831_02630	food_porridge_pulp_adm	1.84346	4.46978e-40	5.92945e-30	pulA	3.2.1.41	CBM48; GH13
MGYG000015640_01203	breast_feeding	5.38395	1.99882e-35	6.96231e-30	pbp1B	2.4.1.129	GT51
MGYG000002414_00739	food_porridge_pulp_adm	1.81346	1.05574e-39	1.69844e-29		3.2.1.172	GH105
MGYG000194245_01340	breast_feeding	6.42154	4.36457e-35	2.95442e-29		3.2.1.51	GH95
MGYG000162925_01007	food_porridge_pulp_adm	1.77056	3.77313e-39	7.93622e-29	murG	2.4.1.227	GT28
MGYG000170010_00179	food_porridge_pulp_adm	1.75397	6.26617e-39	1.45792e-28	arnC	2.4.1.83	GT2
MGYG000110668_01686	food_porridge_pulp_adm	1.7383	1.01956e-38	2.60517e-28		3.2.1.37; 3.2.1.55	GH43; GH51
MGYG000248062_00092	food_porridge_pulp_adm	3.1732	1.07707e-38	2.78082e-28		2.4.1.25	GH77
MGYG000114210_00501	food_porridge_pulp_adm	1.73396	1.16816e-38	3.06243e-28		3.2.1.41	CBM48; GH13
MGYG000009991_00498	food_porridge_pulp_adm	1.72878	1.37518e-38	3.71657e-28		3.2.1.23; 3.2.1.4; 3.2.1.89	GH5; GH9
MGYG000036471_02106	food_porridge_pulp_adm	4.59278	2.15803e-38	6.33254e-28		3.2.1.156	GH8
MGYG000005144_01069	breast_feeding	5.42421	2.9057e-34	8.9405e-28		3.2.1.51	GH29
MGYG000003266_00187	food_porridge_pulp_adm	1.70089	3.36025e-38	1.06639e-27	glgA	2.4.1.21	GT5
MGYG000184485_01847	food_porridge_pulp_adm	1.69264	4.39859e-38	1.46223e-27	glgP	2.4.1.1	GT35
MGYG000006182_01264	food_porridge_pulp_adm	1.68069	6.51884e-38	2.31529e-27		3.2.1.86	GT4
MGYG000131180_00937	food_porridge_pulp_adm	1.67741	7.26884e-38	2.62846e-27	cbpA	2.4.1.20	GT36
MGYG000034744_01982	food_porridge_pulp_adm	1.67512	7.84384e-38	2.87199e-27	amyA2	3.2.1.1	GH13
MGYG000144333_00453	food_porridge_pulp_adm	1.67274	8.49092e-38	3.1493e-27	glgB	2.4.1.18	CBM48; GH13
MGYG000115546_00948	breast_feeding	5.07563	6.47076e-34	3.62134e-27		2.4.1.5	GH13
MGYG000105530_01536	food_porridge_pulp_adm	1.66116	1.25257e-37	4.94374e-27	mltB	5.1.3.15	GH103
MGYG000024249_01049	food_porridge_pulp_adm	1.65219	1.69804e-37	7.02668e-27		3.2.1.78	GH26
MGYG000142366_00028	food_porridge_pulp_adm	1.65124	1.75389e-37	7.29389e-27	pstP	2.4.1.18; 3.1.3.16	CBM48; GH13
MGYG000109022_00519	food_porridge_pulp_adm	2.87339	1.7777e-37	7.40818e-27	murG	2.4.1.227; 6.3.2.8	GT28
MGYG000093998_00744	food_porridge_pulp_adm	2.95278	1.82624e-37	7.64184e-27		3.2.1.21	GH3
MGYG000141588_01353	food_porridge_pulp_adm	1.64992	1.835e-37	7.68413e-27		3.2.1.78	GH26
MGYG000077759_01722	food_porridge_pulp_adm	1.64407	2.24165e-37	9.67574e-27		3.2.1.78	GH26
MGYG000004530_00846	food_porridge_pulp_adm	1.63767	2.79538e-37	1.24685e-26	pbpG	2.4.1.129; 3.4.16.4	GT51
MGYG000090443_01096	food_porridge_pulp_adm	3.02864	2.9968e-37	1.35042e-26	CP_0954	4.2.2.1	PL8
MGYG000258420_00730	food_porridge_pulp_adm	4.54609	3.28757e-37	1.5016e-26	glgB	2.4.1.18	CBM48; GH13
MGYG000017911_00817	food_porridge_pulp_adm	1.62529	4.2979e-37	2.04009e-26		3.2.1.78	GH26
MGYG000027111_00900	food_porridge_pulp_adm	1.62094	5.00683e-37	2.42831e-26		2.4.1.20	GT36
MGYG000002076_01546	food_porridge_pulp_adm	1.59735	1.15759e-36	6.28599e-26	glgA	2.4.1.21	GT5
MGYG000243581_00007	food_porridge_pulp_adm	2.69973	1.18928e-36	6.48068e-26	lacZ	3.2.1.23; 3.2.1.52	GH20
MGYG000108685_00884	food_porridge_pulp_adm	1.59457	1.27944e-36	7.03788e-26		3.2.1.78	GH26
MGYG000174045_00513	food_porridge_pulp_adm	2.66839	1.3004e-36	7.16815e-26		3.2.1.4	GH5; GH9
MGYG000004092_00500	food_porridge_pulp_adm	2.68225	1.45881e-36	8.16002e-26	malQ	2.4.1.25	GH77
MGYG000199376_00762	food_porridge_pulp_adm	2.67844	1.52575e-36	8.58303e-26		3.2.1.4	GH5; GH9
MGYG000217051_01349	food_porridge_pulp_adm	2.66188	1.85686e-36	1.07053e-25	coaE	2.7.1.24; 3.2.2.23; 4.2.99.18	GH23
MGYG000078429_00043	food_porridge_pulp_adm	3.14276	2.11577e-36	1.23953e-25		3.2.1.37; 3.2.1.55	GH43; GH51
MGYG000052688_00678	food_porridge_pulp_adm	1.57383	2.7228e-36	1.64444e-25		3.2.1.41	CBM48; GH13
MGYG000000269_00693	food_porridge_pulp_adm	2.619	3.12157e-36	1.91598e-25		3.2.1.97; 4.2.2.1	GH101; PL8
MGYG000181989_02245	food_porridge_pulp_adm	1.56718	3.48026e-36	2.16343e-25		3.2.1.51	GH95
MGYG000085092_00968	food_porridge_pulp_adm	2.60363	3.77507e-36	2.36885e-25	mrcB	2.4.1.129; 3.4.16.4	GT51
MGYG000004203_02008	food_porridge_pulp_adm	1.56162	4.27898e-36	2.72377e-25		3.2.1.21	GH3
MGYG000136421_00062	food_porridge_pulp_adm	1.55114	6.33236e-36	4.21026e-25	glgA	2.4.1.21	GT5
MGYG000135663_00438	food_porridge_pulp_adm	1.5482	7.07585e-36	4.76136e-25		2.4.1.337	GT4
MGYG000277755_00443	food_porridge_pulp_adm	2.88137	8.77721e-36	6.04269e-25	spoIID	3.5.1.28	CBM50
MGYG000085092_00437	food_porridge_pulp_adm	2.5306	9.58988e-36	6.66337e-25	malQ	2.4.1.25	GH77
MGYG000001954_02417	food_porridge_pulp_adm	1.53571	1.13651e-35	8.03565e-25		3.2.1.133; 3.2.1.135; 3.2.1.54; 3.5.4.33	GH13
MGYG000004092_00068	food_porridge_pulp_adm	2.47342	2.06153e-35	1.54515e-24	murG	2.4.1.227	GT28
MGYG000004092_00397	food_porridge_pulp_adm	2.42924	3.80806e-35	3.01745e-24	apu	2.4.1.25	GH77
MGYG000282428_00413	food_porridge_pulp_adm	2.80782	3.96507e-35	3.15289e-24	xylS	3.2.1.20	GH31
MGYG000097632_01084	food_porridge_pulp_adm	2.40776	5.16994e-35	4.20455e-24		3.2.1.4	GH5; GH9
MGYG000283305_00852	food_porridge_pulp_adm	1.48747	7.48668e-35	6.27411e-24	malQ	2.4.1.25	GH77
MGYG000006990_01479	food_porridge_pulp_adm	1.48604	7.92677e-35	6.67276e-24	surA	2.4.1.129; 3.4.16.4	GT51
MGYG000004092_01594	food_porridge_pulp_adm	2.37103	8.82128e-35	7.48753e-24		2.4.1.129; 3.4.16.4	GT51
MGYG000206391_00887	food_porridge_pulp_adm	2.75681	9.90464e-35	8.48157e-24	pulA	3.2.1.41	CBM48; GH13
MGYG000004092_01376	food_porridge_pulp_adm	2.36201	1.00811e-34	8.64416e-24	glgA	2.4.1.21	GT5
MGYG000193765_01086	food_porridge_pulp_adm	2.78821	2.08595e-34	1.88325e-23		3.1.3.5; 3.1.3.6; 3.1.4.16; 3.2.1.51; 3.6.1.45	GH29
MGYG000146185_00676	food_porridge_pulp_adm	1.4613	2.16097e-34	1.95556e-23		3.2.1.78	GH26
MGYG000032838_01266	food_porridge_pulp_adm	3.18679	3.56758e-34	3.33234e-23		3.2.1.18	GH33
MGYG000031614_00146	food_porridge_pulp_adm	3.06031	4.04082e-34	3.80244e-23		3.2.1.52	GH20
MGYG000077477_00603	food_porridge_pulp_adm	5.70683	4.25868e-34	4.01976e-23	glgB	2.4.1.18	CBM48; GH13
MGYG000285630_00830	breast_feeding	4.45295	2.14962e-31	4.57074e-23		2.4.1.5	GH13
MGYG000004839_02308	food_porridge_pulp_adm	2.24542	6.16041e-34	5.93609e-23	abgA	3.2.1.86	GT1
MGYG000078326_00923	food_porridge_pulp_adm	1.43555	6.29491e-34	6.07272e-23	pulA	3.2.1.41	CBM48; GH13
MGYG000109022_00716	food_porridge_pulp_adm	2.18893	1.57241e-33	1.5852e-22	bcsA	2.4.1.12	GT2
MGYG000109022_00717	food_porridge_pulp_adm	2.80805	2.12485e-33	2.16872e-22	bcsA	2.4.1.12	GT2
MGYG000279525_00351	food_porridge_pulp_adm	1.40574	2.24378e-33	2.29497e-22	glgP	2.4.1.1	GT35
MGYG000086260_00475	food_porridge_pulp_adm	1.37246	9.67964e-33	1.03455e-21	guxA1	3.2.1.91	GH6
MGYG000028875_01036	food_porridge_pulp_adm	1.37164	1.00416e-32	1.07408e-21	glgA	2.4.1.21	GT5
MGYG000068690_00408	food_porridge_pulp_adm	2.57391	1.66278e-32	1.79505e-21		3.2.1.99	GH43
MGYG000211693_01400	food_porridge_pulp_adm	1.35371	2.25138e-32	2.44054e-21		2.4.1.1	GT35
MGYG000196819_01242	food_porridge_pulp_adm	2.6545	3.21473e-32	3.49711e-21		3.2.1.1	GH13
MGYG000065089_00189	food_porridge_pulp_adm	4.26761	7.62911e-32	8.32014e-21		2.4.1.291	GT4
MGYG000161056_01791	breast_feeding	6.24004	1.00883e-29	1.25893e-20		3.2.1.51	GH29
MGYG000087401_01118	food_porridge_pulp_adm	1.31706	1.22249e-31	1.33029e-20		2.4.1.129; 3.4.16.4	GT51
MGYG000072703_01727	food_porridge_pulp_adm	2.00002	1.32257e-31	1.4383e-20	ponA	2.4.1.129; 3.4.16.4	GT51
MGYG000112129_01190	food_porridge_pulp_adm	1.93913	1.69772e-31	1.84184e-20		2.7.8.12	GT2
MGYG000162629_00052	food_porridge_pulp_adm	2.75514	2.33431e-31	2.52213e-20		3.2.1.180	GH88
MGYG000084072_00541	food_porridge_pulp_adm	2.89774	2.35769e-31	2.54703e-20	murG	2.4.1.227	GT28
MGYG000215897_00124	food_porridge_pulp_adm	1.29913	2.85642e-31	3.07645e-20		3.2.1.14	GH18
MGYG000000398_01658	food_porridge_pulp_adm	1.29862	2.92668e-31	3.15081e-20		3.2.1.4	GH5; GH9
MGYG000026932_00736	food_porridge_pulp_adm	2.95059	4.3025e-31	4.59761e-20	mrcB	2.4.1.129; 3.4.16.4	GT51
MGYG000003977_00284	food_porridge_pulp_adm	3.10091	4.50493e-31	4.80911e-20		2.4.1.129; 3.4.16.4	GT51
MGYG000151856_01702	food_porridge_pulp_adm	1.28795	4.88205e-31	5.20229e-20		3.2.1.4	GH5; GH9
MGYG000153260_00012	food_porridge_pulp_adm	2.91502	5.39272e-31	5.73306e-20		4.2.2.1	PL8
MGYG000108812_01976	food_porridge_pulp_adm	2.35587	5.53102e-31	5.87649e-20		3.2.1.180	GH88
MGYG000225359_01289	food_porridge_pulp_adm	1.27537	8.98417e-31	9.42106e-20		3.2.1.4	GH5; GH9
MGYG000106599_00021	food_porridge_pulp_adm	4.97939	1.35493e-30	1.40226e-19	gtfA	2.4.1.329; 2.4.1.7	GH13
MGYG000045418_00323	food_porridge_pulp_adm	2.23608	1.48122e-30	1.52822e-19		3.2.1.21; 3.2.1.52	GH3
MGYG000000426_00835	food_porridge_pulp_adm	2.31701	2.31385e-30	2.34742e-19		2.4.1.337	GT4
MGYG000003977_00073	food_porridge_pulp_adm	3.19563	3.2278e-30	3.22913e-19		2.4.1.315	GT28
MGYG000212771_00057	food_animal_milk_adm	2.40911	5.65139e-30	5.50697e-19		3.2.1.21	GH3
MGYG000068829_01205	food_porridge_pulp_adm	1.76655	7.84372e-30	7.51452e-19	malL	3.2.1.1; 3.2.1.10	GH13
MGYG000145626_00769	food_porridge_pulp_adm	1.22526	1.09228e-29	1.02741e-18	pstP	2.4.1.18; 3.1.3.16	CBM48; GH13
MGYG000259760_00288	food_animal_milk_adm	2.21921	1.26169e-29	1.17687e-18		3.2.1.86	GT1
MGYG000152050_01112	food_porridge_pulp_adm	2.24275	1.42481e-29	1.31945e-18	murG	2.4.1.227	GT28
MGYG000003977_00407	food_porridge_pulp_adm	3.25622	1.65037e-29	1.5147e-18	murG	2.4.1.227	GT28
MGYG000003622_01231	food_porridge_pulp_adm	1.72571	2.11015e-29	1.90691e-18	glgA	2.4.1.21	GT5
MGYG000103700_00149	food_porridge_pulp_adm	2.53224	3.33868e-29	2.92593e-18		4.2.2.1	PL8
MGYG000196819_01583	food_porridge_pulp_adm	2.8268	3.79474e-29	3.29591e-18	pulA	3.2.1.41	CBM48; GH13
MGYG000186794_01442	food_porridge_pulp_adm	1.71835	4.03897e-29	3.49252e-18	glgB	2.4.1.18	CBM48; GH13
MGYG000256076_01397	food_porridge_pulp_adm	3.12625	4.59282e-29	3.9348e-18	glgP	2.4.1.1	GT35
MGYG000048622_00942	food_porridge_pulp_adm	1.69187	4.91638e-29	4.19107e-18	apu	2.4.1.25; 3.2.1.133; 3.2.1.135; 3.2.1.20; 3.2.1.54	GH13; GH31; GH77
MGYG000035757_00504	breast_feeding	5.68186	8.11943e-28	4.27914e-18		3.2.1.4	GH5; GH9
MGYG000164367_01117	food_porridge_pulp_adm	1.67216	8.13712e-29	6.6752e-18		3.2.1.55	GH51
MGYG000039255_00923	food_porridge_pulp_adm	2.94286	1.08319e-28	8.68357e-18		2.4.1.337	GT4
MGYG000272788_00328	food_porridge_pulp_adm	2.58196	1.14937e-28	9.16924e-18		3.2.1.24	GH38
MGYG000131643_01654	food_porridge_pulp_adm	3.26525	1.4107e-28	1.10626e-17		3.2.1.21	GH3
MGYG000033739_00885	food_porridge_pulp_adm	5.38822	1.47135e-28	1.14969e-17	murG	2.4.1.227	GT28
MGYG000069378_00332	food_porridge_pulp_adm	1.64908	2.08785e-28	1.5824e-17	spr	3.4.17.13	CBM50
MGYG000278146_02344	food_porridge_pulp_adm	1.63999	2.6103e-28	1.93891e-17		2.4.1.227	GT28
MGYG000013839_00692	food_porridge_pulp_adm	1.62743	2.63283e-28	1.9541e-17		2.4.1.129; 3.4.16.4	GT51
MGYG000042775_00768	food_porridge_pulp_adm	3.24697	3.32564e-28	2.41542e-17		3.2.1.24	GH38
MGYG000016162_00250	food_porridge_pulp_adm	3.14569	3.58949e-28	2.58833e-17		3.2.1.20	GH31
MGYG000011774_01827	food_animal_milk_adm	1.71586	3.66855e-28	2.63987e-17		3.2.1.51	GH95
MGYG000109365_00898	food_animal_milk_adm	1.71268	3.77902e-28	2.7117e-17		3.2.1.21	GH3
MGYG000006576_01204	food_animal_milk_adm	1.7073	3.97463e-28	2.83833e-17		3.2.1.52	GH20
MGYG000004382_01646	food_porridge_pulp_adm	2.92465	3.97577e-28	2.83907e-17		2.4.1.129; 3.4.16.4	GT51
MGYG000053831_00879	food_porridge_pulp_adm	2.90765	4.31915e-28	3.05977e-17	coaE	2.7.1.24; 3.2.2.23; 4.2.99.18	GH23
MGYG000004382_02174	food_porridge_pulp_adm	2.82717	4.5327e-28	3.19605e-17		2.4.1.109	GT39
MGYG000099901_02322	food_animal_milk_adm	1.6546	6.66201e-28	4.5212e-17		2.4.1.337	GT4
MGYG000078806_01022	food_animal_milk_adm	1.64427	7.40753e-28	4.97311e-17		3.2.1.68	CBM48; GH13
MGYG000027664_00514	food_animal_milk_adm	1.63456	8.19644e-28	5.44569e-17	pulA	3.2.1.41	CBM48; GH13
MGYG000000119_01238	food_animal_milk_adm	1.63171	8.4462e-28	5.5942e-17		2.4.1.83	GT2
MGYG000250516_00167	food_animal_milk_adm	1.62709	8.86955e-28	5.84476e-17	nplT	3.2.1.133; 3.2.1.135; 3.2.1.54	GH13
MGYG000250516_00166	food_animal_milk_adm	1.6237	9.19536e-28	6.03665e-17		2.4.1.1	GT35
MGYG000091915_00305	food_animal_milk_adm	1.61816	9.75784e-28	6.36609e-17		3.2.1.37; 3.2.1.55	GH43; GH51
MGYG000002738_02731	food_animal_milk_adm	1.61721	9.85854e-28	6.42483e-17		2.4.1.315	GT28
MGYG000009024_02312	food_animal_milk_adm	1.61554	1.00381e-27	6.52943e-17	glgB	2.4.1.18	CBM48; GH13
MGYG000000269_02055	food_porridge_pulp_adm	2.52932	1.04648e-27	6.77702e-17	recX	2.4.1.337	GT4
MGYG000213855_00731	food_animal_milk_adm	2.22819	1.11884e-27	7.19424e-17		3.2.1.26	GH32
MGYG000085092_00250	food_porridge_pulp_adm	2.53478	1.12351e-27	7.22106e-17	pulA	3.2.1.41	CBM48; GH13
MGYG000095729_01482	food_porridge_pulp_adm	1.56582	1.7328e-27	1.06228e-16	glgA	2.4.1.21	GT5
MGYG000099901_00118	food_animal_milk_adm	1.55146	2.07845e-27	1.24841e-16		3.2.1.21	GH3
MGYG000276526_00674	food_porridge_pulp_adm	1.5553	2.29059e-27	1.3607e-16	bcsZ	3.2.1.4	GH5; GH8; GH9
MGYG000000042_00678	food_animal_milk_adm	2.00323	2.42754e-27	1.43249e-16		3.2.1.156	GH8
MGYG000069553_00138	food_porridge_pulp_adm	2.66614	2.89328e-27	1.67296e-16	murG	2.4.1.227	GT28
MGYG000062516_01229	food_porridge_pulp_adm	2.82644	3.36319e-27	1.91058e-16	glgB	2.4.1.18	CBM48; GH13
MGYG000086552_00583	food_animal_milk_adm	1.50223	3.82676e-27	2.14079e-16		3.2.1.1	GH13
MGYG000132503_00011	food_animal_milk_adm	1.48395	4.86012e-27	2.64143e-16	malQ	2.4.1.25	GH77
MGYG000016708_02843	food_animal_milk_adm	1.45705	6.9983e-27	3.63534e-16		3.2.1.177	GH31
MGYG000178187_00382	food_animal_milk_adm	1.75789	8.25431e-27	4.19899e-16	glgA	2.4.1.21	GT5
MGYG000004382_00438	food_porridge_pulp_adm	2.60074	8.3663e-27	4.24864e-16	glgB	2.4.1.18	CBM48; GH13
MGYG000011915_01472	food_animal_milk_adm	1.43237	9.91891e-27	4.92799e-16	murG	2.4.1.227	GT28
MGYG000131895_00119	breast_feeding	4.84862	4.29492e-26	5.08521e-16	apuB	3.2.1.41; 3.2.1.68	CBM48; GH13
MGYG000248543_01163	food_porridge_pulp_adm	2.70887	1.19212e-26	5.78237e-16		3.2.1.4	GH5; GH9
MGYG000061080_00303	food_animal_milk_adm	1.41715	1.23855e-26	5.97746e-16	mtgA	2.4.1.129	GT51
MGYG000156898_00452	food_animal_milk_adm	1.6893	1.28338e-26	6.16481e-16	apu	2.4.1.25; 3.2.1.133; 3.2.1.135; 3.2.1.20; 3.2.1.54	GH13; GH31; GH77
MGYG000077418_01168	food_porridge_pulp_adm	1.49046	1.35835e-26	6.47605e-16		3.2.1.86	GT1
MGYG000145466_00970	food_animal_milk_adm	1.67891	1.37848e-26	6.55916e-16		3.2.1.1	GH13
MGYG000004092_01379	food_porridge_pulp_adm	2.51033	1.38782e-26	6.59768e-16	glgB	2.4.1.18	CBM48; GH13
MGYG000073683_00904	food_animal_milk_adm	1.40289	1.53273e-26	7.19063e-16		3.1.2.12	CE1
MGYG000114826_00694	food_animal_milk_adm	1.39543	1.71691e-26	7.9326e-16		3.2.1.20; 3.2.1.3	GH31; GH97
MGYG000002738_01050	food_animal_milk_adm	1.39014	1.86218e-26	8.50954e-16		3.2.1.26	GH32
MGYG000224785_00740	food_animal_milk_adm	1.38109	2.14388e-26	9.60992e-16	pulA	3.2.1.41	CBM48; GH13
MGYG000111356_03973	food_animal_milk_adm	1.35843	3.07816e-26	1.31198e-15		2.4.1.129; 3.4.16.4	GT51
MGYG000167458_01137	food_animal_milk_adm	1.56215	3.39124e-26	1.42572e-15		3.2.1.41	CBM48; GH13
MGYG000046022_00001	food_porridge_pulp_adm	1.457	3.52772e-26	1.47479e-15	glgP	2.4.1.1	GT35
MGYG000118923_01290	food_animal_milk_adm	1.34979	3.54632e-26	1.48145e-15		3.2.1.51	GH29
MGYG000002737_00088	food_animal_milk_adm	1.3405	4.13889e-26	1.69111e-15	lpxB	2.4.1.182	GT19
MGYG000213227_00025	food_animal_milk_adm	1.33778	4.33285e-26	1.75868e-15		3.2.1.52	GH20
MGYG000056043_00983	food_porridge_pulp_adm	1.44906	4.50935e-26	1.81977e-15	glgA	2.4.1.21	GT5
MGYG000016946_02427	food_animal_milk_adm	2.36771	4.63009e-26	1.86134e-15	glgB	2.4.1.18	CBM48; GH13
MGYG000129854_01603	food_animal_milk_adm	1.31419	6.49704e-26	2.48493e-15	fucA	3.2.1.51	GH29
MGYG000226013_02259	food_animal_milk_adm	1.48538	6.85453e-26	2.60082e-15	glgA	2.4.1.21	GT5
MGYG000286510_01180	food_animal_milk_adm	1.28335	1.13111e-25	3.97741e-15		4.2.2.23	PL11
MGYG000004439_01275	food_porridge_pulp_adm	2.05363	1.2067e-25	4.20093e-15		2.4.1.20	GT36
MGYG000256423_00913	food_porridge_pulp_adm	2.3226	1.37246e-25	4.68319e-15		3.2.1.4	GH5; GH9
MGYG000176519_02084	food_animal_milk_adm	1.2703	1.44285e-25	4.88496e-15	susB	3.2.1.20; 3.2.1.3	GH31; GH97
MGYG000074768_01457	food_porridge_pulp_adm	1.87343	1.472e-25	4.96803e-15		3.2.1.78	GH26
MGYG000004382_01281	food_porridge_pulp_adm	2.97049	1.69246e-25	5.5877e-15	bbmA	3.2.1.133; 3.2.1.135; 3.2.1.54	GH13
MGYG000002166_00622	food_porridge_pulp_adm	2.27554	2.20018e-25	6.96567e-15	ponA	2.4.1.129; 3.4.16.4	GT51
MGYG000194510_00887	food_porridge_pulp_adm	3.27094	2.43538e-25	7.58475e-15		3.2.1.37	GH43
MGYG000263546_00877	food_animal_milk_adm	1.36634	2.54268e-25	7.8637e-15	glgB	2.4.1.18	CBM48; GH13
MGYG000089909_01583	food_animal_milk_adm	1.2382	2.68924e-25	8.24137e-15		3.2.1.40; 3.2.1.97	GH101
MGYG000062516_00410	food_porridge_pulp_adm	2.81997	2.83493e-25	8.61327e-15	glgX	3.2.1.68	CBM48; GH13
MGYG000080779_01061	food_porridge_pulp_adm	1.38593	3.36634e-25	9.94276e-15	malQ	2.4.1.25	GH77
MGYG000064003_00589	food_porridge_pulp_adm	3.74753	4.7076e-25	1.31466e-14		2.4.1.129; 3.4.16.4	GT51
MGYG000004850_00586	food_porridge_pulp_adm	2.68166	5.25298e-25	1.43999e-14		3.2.1.52	GH20
MGYG000044847_00567	food_porridge_pulp_adm	1.36567	5.69644e-25	1.54015e-14	glgA	2.4.1.21	GT5
MGYG000148464_00153	food_porridge_pulp_adm	1.89892	5.83553e-25	1.57127e-14	surA	2.4.1.129; 3.4.16.4	GT51
MGYG000015173_01129	food_porridge_pulp_adm	1.36747	6.18114e-25	1.64801e-14		4.2.2.8	PL12
MGYG000156757_00145	food_animal_milk_adm	1.19772	6.20036e-25	1.65226e-14	lpxB	2.4.1.182	GT19
MGYG000232980_01470	food_animal_milk_adm	1.29698	6.33984e-25	1.68299e-14		2.4.1.337	GT4
MGYG000077052_01927	food_porridge_pulp_adm	1.36648	6.38824e-25	1.69362e-14		3.2.1.156	GH8
MGYG000178054_00980	food_porridge_pulp_adm	2.66553	6.594e-25	1.73866e-14		3.2.1.1; 3.2.1.21	GH13; GH3
MGYG000284863_01521	food_animal_milk_adm	1.19418	6.69e-25	1.75959e-14		3.2.1.21	GH3
MGYG000178485_00690	food_animal_milk_adm	1.19149	7.08933e-25	1.84606e-14	glgA	2.4.1.21	GT5
MGYG000218362_02023	food_animal_milk_adm	1.17637	9.86976e-25	2.42588e-14	pulA	3.2.1.41	CBM48; GH13
MGYG000144742_01560	food_animal_milk_adm	1.17308	1.06192e-24	2.57658e-14		3.2.1.51	GH95
MGYG000172075_00858	food_animal_milk_adm	1.25431	1.18694e-24	2.82361e-14		3.2.1.133; 3.2.1.135; 3.2.1.54; 3.5.4.33	GH13
MGYG000004789_00436	breast_feeding	4.88384	2.0997e-24	3.6024e-14		2.4.1.5	GH13
MGYG000003804_01141	food_animal_milk_adm	1.54206	1.82867e-24	4.02437e-14	waaA	2.4.99.12; 2.4.99.13; 2.4.99.14; 2.4.99.15	GT30
MGYG000062516_01518	food_porridge_pulp_adm	3.06275	1.91094e-24	4.17178e-14	glgB	2.4.1.18	CBM48; GH13
MGYG000003925_00630	food_animal_milk_adm	1.2062	2.57366e-24	5.31874e-14		3.2.1.177	GH31
MGYG000143158_00356	food_porridge_pulp_adm	2.8077	2.89716e-24	5.8567e-14	lpg2	2.4.1.337	GT4
MGYG000141894_01182	food_porridge_pulp_adm	3.80545	3.14251e-24	6.25672e-14		3.2.1.78	GH26
MGYG000004824_01084	food_porridge_pulp_adm	1.31767	3.33697e-24	6.56936e-14		3.2.1.51	GH95
MGYG000004382_01510	food_porridge_pulp_adm	2.75925	3.34003e-24	6.57424e-14		2.4.1.83	GT2
MGYG000245340_01040	food_animal_milk_adm	1.12269	3.43901e-24	6.73194e-14		3.2.1.1	GH13
MGYG000000788_00424	food_animal_milk_adm	1.18922	3.44483e-24	6.74118e-14		3.2.1.52	GH20
MGYG000173033_02169	food_animal_milk_adm	1.18895	3.46104e-24	6.76691e-14		3.2.1.52	GH20
MGYG000006451_01183	food_animal_milk_adm	1.12146	3.54377e-24	6.89785e-14	abfA	3.2.1.55	GH51
MGYG000003863_01991	food_animal_milk_adm	1.12146	3.54377e-24	6.89785e-14	abfA	3.2.1.55	GH51
MGYG000246962_00305	food_porridge_pulp_adm	2.65601	3.80714e-24	7.31066e-14		3.2.1.37	GH43
MGYG000002995_03382	food_animal_milk_adm	1.11696	3.95683e-24	7.54273e-14	treC	3.2.1.1; 3.2.1.93	GH13
MGYG000243581_01186	food_porridge_pulp_adm	2.72112	4.63063e-24	8.56642e-14		3.2.1.26	GH32
MGYG000006423_01156	food_porridge_pulp_adm	2.0408	7.33268e-24	1.24095e-13		3.2.1.24	GH38
MGYG000003804_01528	food_animal_milk_adm	1.40635	7.44645e-24	1.25641e-13	lpxB	2.4.1.182	GT19
MGYG000274114_01242	breast_feeding	5.47555	7.29321e-24	1.2962e-13	neu	3.2.1.18	GH33
MGYG000002537_00981	food_animal_milk_adm	1.39427	8.57734e-24	1.4075e-13		2.4.1.212	GT2
MGYG000190178_00843	food_animal_milk_adm	1.08471	8.95371e-24	1.45684e-13		3.2.1.52	GH20
MGYG000009352_00559	food_porridge_pulp_adm	1.89426	1.05669e-23	1.66364e-13		4.2.2.1	PL8
MGYG000245718_00646	food_porridge_pulp_adm	1.90582	1.16908e-23	1.80375e-13		3.2.1.133; 3.2.1.135; 3.2.1.54; 3.5.4.33	GH13
MGYG000001858_00330	food_animal_milk_adm	1.11925	1.28149e-23	1.94105e-13	lpxB	2.4.1.182	GT19
MGYG000011662_02076	breast_feeding	4.6838	1.24686e-23	2.22302e-13	neu	3.2.1.18	GH33
MGYG000084148_01077	food_animal_milk_adm	1.10969	1.55679e-23	2.26699e-13		2.4.1.20	GT36
MGYG000149263_00083	food_porridge_pulp_adm	2.1382	1.5787e-23	2.29236e-13	lpxB	2.4.1.182	GT19
MGYG000110778_01749	food_porridge_pulp_adm	1.27176	1.67886e-23	2.40744e-13		3.2.1.78	GH26
MGYG000148642_00834	food_animal_milk_adm	1.05455	2.00729e-23	2.77492e-13	bglX	3.2.1.21	GH3
MGYG000003804_01713	food_animal_milk_adm	1.32544	2.03829e-23	2.80891e-13		3.2.1.45	GH30
MGYG000197144_00030	food_animal_milk_adm	1.05258	2.11903e-23	2.89687e-13	hepC	4.2.2.8	PL12
MGYG000144591_00426	food_porridge_pulp_adm	2.53525	2.20599e-23	2.99082e-13		3.2.1.51	GH95
MGYG000002877_01293	food_animal_milk_adm	1.05021	2.2627e-23	3.05164e-13	bglX	3.2.1.21	GH3
MGYG000172409_01241	food_animal_milk_adm	1.05021	2.2627e-23	3.05164e-13	bglX	3.2.1.21	GH3
MGYG000024382_01199	food_animal_milk_adm	1.04937	2.31581e-23	3.1083e-13		3.2.1.177	GH31
MGYG000196819_01793	food_porridge_pulp_adm	2.6892	2.52179e-23	3.32542e-13		3.2.1.1	GH13
MGYG000006444_00857	food_animal_milk_adm	1.29722	2.99964e-23	3.81478e-13		3.2.1.14	GH18
MGYG000046974_00499	food_porridge_pulp_adm	1.7244	3.34791e-23	4.16051e-13		3.2.1.4	GH5; GH9
MGYG000001572_00860	food_animal_milk_adm	1.06597	3.98705e-23	4.77496e-13		3.2.1.55	GH51
MGYG000002423_02226	food_animal_milk_adm	1.30357	4.04527e-23	4.82979e-13	ydhO	3.2.1.14	GH18
MGYG000003804_01160	food_animal_milk_adm	1.27506	4.12089e-23	4.90074e-13		2.4.2.26	GT14
MGYG000272788_00327	food_porridge_pulp_adm	2.14686	4.15988e-23	4.9372e-13		3.2.1.24	GH38
MGYG000056491_00560	food_porridge_pulp_adm	2.70736	4.18481e-23	4.96048e-13	ponA	2.4.1.129; 3.4.16.4	GT51
MGYG000002737_00283	food_animal_milk_adm	1.0257	4.52804e-23	5.27784e-13		3.2.1.45	GH116
MGYG000010091_01082	food_porridge_pulp_adm	1.80645	5.07264e-23	5.77052e-13	glgP	2.4.1.1	GT35
MGYG000088645_02401	food_animal_milk_adm	1.05436	5.19465e-23	5.87921e-13	malL	3.2.1.1; 3.2.1.10	GH13
MGYG000242273_00395	food_porridge_pulp_adm	3.52065	5.97966e-23	6.56537e-13		3.2.1.52	GH20
MGYG000193463_00230	food_porridge_pulp_adm	1.23621	6.10987e-23	6.67712e-13	glgP	2.4.1.1	GT35
MGYG000000866_00943	food_porridge_pulp_adm	1.23592	6.17551e-23	6.73326e-13	malQ	2.4.1.25	GH77
MGYG000001095_01908	food_animal_milk_adm	1.23326	7.77504e-23	8.06256e-13		3.2.1.45	GH30
MGYG000121053_00840	food_animal_milk_adm	1.43862	7.88985e-23	8.1554e-13		3.2.1.51	GH95
MGYG000258310_00928	food_animal_milk_adm	1.02558	1.02928e-22	1.0034e-12	glgA	2.4.1.21	GT5
MGYG000150728_00961	food_porridge_pulp_adm	2.33242	1.07463e-22	1.03764e-12		3.2.1.177	GH31
MGYG000004863_00871	food_porridge_pulp_adm	1.83245	1.08846e-22	1.04802e-12	murG	2.4.1.227	GT28
MGYG000093828_00904	food_porridge_pulp_adm	2.54046	1.10473e-22	1.06019e-12		3.2.1.1	GH57
MGYG000216836_00466	food_animal_milk_adm	1.02223	1.11749e-22	1.0697e-12		3.2.1.37	GH43
MGYG000100044_02722	food_animal_milk_adm	1.75185	1.48071e-22	1.33091e-12		3.2.1.177	GH31
MGYG000092471_01818	food_porridge_pulp_adm	3.8896	1.50907e-22	1.35061e-12		3.2.1.86	GT4
MGYG000000281_03800	food_animal_milk_adm	1.00965	1.53019e-22	1.36523e-12	malQ	2.4.1.25	GH77
MGYG000068694_00107	food_porridge_pulp_adm	1.90715	1.64374e-22	1.44304e-12	surA	2.4.1.129; 3.4.16.4	GT51
MGYG000217798_00773	food_porridge_pulp_adm	2.22071	1.64508e-22	1.44395e-12		2.4.1.109	GT39
MGYG000132487_00219	breast_feeding	5.69868	9.54566e-23	1.61526e-12	malQ	2.4.1.25	GH77
MGYG000165010_00831	food_porridge_pulp_adm	3.46145	1.91428e-22	1.62348e-12		3.2.1.4	GH5; GH9
MGYG000109022_00480	food_porridge_pulp_adm	2.51251	1.99703e-22	1.67741e-12		4.2.2.1	PL8
MGYG000085989_01842	food_porridge_pulp_adm	1.20354	2.06909e-22	1.72395e-12		2.4.1.280	GH94
MGYG000002889_01366	food_animal_milk_adm	1.20341	2.07458e-22	1.72748e-12	pbpC	2.4.1.129	GT51
MGYG000156747_00193	food_porridge_pulp_adm	1.92221	2.16518e-22	1.78539e-12		3.2.1.177	GH31
MGYG000285561_00524	food_animal_milk_adm	0.995102	2.22369e-22	1.82249e-12		3.2.1.20; 3.2.1.3	GH31; GH97
MGYG000062516_02253	food_porridge_pulp_adm	2.64574	2.37561e-22	1.91773e-12	pulA	3.2.1.41	CBM48; GH13
MGYG000183864_00426	food_porridge_pulp_adm	1.86463	2.60278e-22	2.05745e-12		2.4.1.329; 2.4.1.7	GH13
MGYG000004377_00311	food_animal_milk_adm	0.967609	2.66036e-22	2.09238e-12		2.4.1.11	GT3
MGYG000206685_00083	food_porridge_pulp_adm	3.69216	2.73226e-22	2.13575e-12		2.4.1.52	GT4
MGYG000061313_01238	breast_feeding	3.91224	1.30312e-22	2.16836e-12	pbp2A	2.4.1.129; 3.4.16.4	GT51
MGYG000003367_00961	food_animal_milk_adm	0.964062	2.98212e-22	2.28435e-12		3.2.1.177	GH31
MGYG000006879_00971	food_animal_milk_adm	0.982459	3.10645e-22	2.35716e-12		2.4.1.348	GT4
MGYG000225962_00977	food_animal_milk_adm	1.14832	3.31762e-22	2.4792e-12	pbp1B	2.4.1.129	GT51
MGYG000003382_01976	food_animal_milk_adm	1.17473	3.49699e-22	2.58139e-12	treZ	2.4.1.18; 3.2.1.141	CBM48; GH13
MGYG000118923_00452	food_animal_milk_adm	0.958687	3.55022e-22	2.61146e-12		3.2.1.21	GH3
MGYG000003364_01128	food_animal_milk_adm	0.976498	3.64804e-22	2.66644e-12	glgA	2.4.1.21	GT5
MGYG000235478_00574	food_animal_milk_adm	1.14101	3.80116e-22	2.75177e-12		3.2.1.133; 3.2.1.135; 3.2.1.54	GH13
MGYG000062516_01380	food_porridge_pulp_adm	2.7683	3.8101e-22	2.75673e-12		3.2.1.1	GH13
MGYG000182876_01458	food_animal_milk_adm	0.95645	3.81943e-22	2.7619e-12		3.2.1.24	GH38
MGYG000130764_00566	food_porridge_pulp_adm	2.63787	4.1426e-22	2.93909e-12		2.4.1.348	GT4
MGYG000078326_00924	food_porridge_pulp_adm	1.50423	4.26455e-22	3.00505e-12	pulA	3.2.1.41	CBM48; GH13
MGYG000013082_01065	food_animal_milk_adm	0.970055	4.3501e-22	3.05105e-12	mrcB	2.4.1.129; 3.4.16.4	GT51
MGYG000128077_00158	food_porridge_pulp_adm	2.00468	5.33176e-22	3.56404e-12	malP	2.4.1.1	GT35
MGYG000047754_01112	food_porridge_pulp_adm	2.29568	5.47216e-22	3.63539e-12	celA	3.2.1.4	GH5; GH9
MGYG000002560_04114	food_animal_milk_adm	1.28609	5.60449e-22	3.70223e-12		2.4.1.187	GT26
MGYG000008076_04662	food_animal_milk_adm	0.960169	5.72527e-22	3.76289e-12		3.2.1.21	GH3
MGYG000084323_00187	food_porridge_pulp_adm	2.48796	5.97653e-22	3.88806e-12		3.2.1.4	GH5; GH9
MGYG000004144_00392	food_porridge_pulp_adm	1.88715	6.06728e-22	3.93294e-12		3.2.1.51	GH29
MGYG000194548_01531	food_porridge_pulp_adm	2.02997	6.35081e-22	4.07211e-12		3.2.1.21	GH3
MGYG000033890_01590	food_animal_milk_adm	0.954991	6.62642e-22	4.20589e-12		3.2.1.52	GH20
MGYG000200869_00617	breast_feeding	5.15847	2.79667e-22	4.42281e-12		3.2.1.10	GH13
MGYG000064121_01627	food_animal_milk_adm	0.950916	7.4427e-22	4.59421e-12		3.2.1.52	GH20
MGYG000008351_01032	food_animal_milk_adm	2.46995	7.52529e-22	4.63288e-12		3.2.1.21	GH3
MGYG000154922_00401	food_porridge_pulp_adm	1.9608	8.35455e-22	5.01546e-12	spr	3.4.17.13	CBM50
MGYG000001644_01341	food_porridge_pulp_adm	1.93036	8.74203e-22	5.19088e-12	susB	3.2.1.20; 3.2.1.3	GH31; GH97
MGYG000001371_02729	food_porridge_pulp_adm	1.72558	8.7788e-22	5.20743e-12		3.2.1.55	GH51
MGYG000213127_00771	breast_feeding	5.99432	3.34385e-22	5.21531e-12	gtfA	2.4.1.7	GH13
MGYG000002094_00171	food_porridge_pulp_adm	2.40759	8.83368e-22	5.23209e-12	glgA	2.4.1.21	GT5
MGYG000095653_02776	food_animal_milk_adm	1.12623	8.9961e-22	5.30484e-12	rhiN	3.2.1.172	GH105
MGYG000002613_00088	food_animal_milk_adm	0.941814	9.68222e-22	5.60857e-12	amyA2	3.2.1.135	GH13
MGYG000104721_01202	food_porridge_pulp_adm	2.06516	1.05244e-21	5.97398e-12	glgP	2.4.1.1	GT35
MGYG000021250_00074	food_porridge_pulp_adm	3.34582	1.1539e-21	6.40438e-12	bgl	3.2.1.21; 3.2.1.86	GT1
MGYG000275990_01691	food_animal_milk_adm	0.92067	1.27975e-21	6.92504e-12	bglX	3.2.1.21	GH3
MGYG000004382_01434	food_porridge_pulp_adm	2.85544	1.29872e-21	7.00234e-12	murG	2.4.1.227	GT28
MGYG000101629_00829	breast_feeding	3.3972	5.57295e-22	8.32013e-12		3.2.1.97	GH101
MGYG000004353_00697	food_porridge_pulp_adm	1.6639	1.63404e-21	8.32499e-12		3.1.1.53; 3.2.1.4	GH5; GH9
MGYG000028339_01595	breast_feeding	5.61258	5.7137e-22	8.51076e-12	ftsW	2.4.1.227	GT28
MGYG000004599_01707	food_animal_milk_adm	0.911168	1.78762e-21	8.90662e-12	glgP	2.4.1.1; 2.4.1.11; 2.4.1.8	GH65; GT3; GT35
MGYG000194918_01918	food_animal_milk_adm	1.81567	1.94467e-21	9.48805e-12	xylS	3.2.1.177	GH31
MGYG000073720_00140	breast_feeding	5.63948	6.5751e-22	9.66587e-12		3.2.1.55	GH51
MGYG000284027_00556	food_porridge_pulp_adm	1.71218	2.11881e-21	1.01186e-11	wcoB	3.2.1.1; 3.2.1.4	GH13; GH5; GH9
MGYG000277558_01763	food_porridge_pulp_adm	4.193	2.45344e-21	1.12934e-11	glgB	2.4.1.18	CBM48; GH13
MGYG000147405_01137	food_animal_milk_adm	1.71953	2.46323e-21	1.13271e-11		3.2.1.26	GH32
MGYG000005809_00340	food_animal_milk_adm	0.90158	2.51906e-21	1.15187e-11	malQ	2.4.1.25	GH77
MGYG000008692_00591	food_porridge_pulp_adm	3.24075	2.6719e-21	1.20375e-11	glgB	2.4.1.18	CBM48; GH13
MGYG000002094_00175	food_porridge_pulp_adm	1.96044	3.43433e-21	1.45183e-11	glgB	2.4.1.18	CBM48; GH13
MGYG000196819_00203	food_porridge_pulp_adm	2.78397	4.23732e-21	1.69759e-11		2.4.1.129; 3.4.16.4	GT51
MGYG000003773_01614	food_porridge_pulp_adm	1.57114	5.39113e-21	2.02983e-11		2.4.1.64	GH65
MGYG000091758_00737	food_porridge_pulp_adm	2.89681	5.55993e-21	2.07674e-11	glgP	2.4.1.1	GT35
MGYG000190796_00089	food_porridge_pulp_adm	2.37423	5.68623e-21	2.11157e-11		2.4.1.52	GT4
MGYG000005661_02045	food_animal_milk_adm	1.80404	5.89153e-21	2.16776e-11	abfA	3.2.1.55	GH51
MGYG000244680_01274	food_porridge_pulp_adm	2.91815	6.16786e-21	2.24256e-11	ponA	2.4.1.129; 3.4.16.4	GT51
MGYG000272788_01014	food_porridge_pulp_adm	2.53888	6.38814e-21	2.30153e-11		3.2.1.37	GH43
MGYG000007723_00380	breast_feeding	4.9799	1.76608e-21	2.33695e-11	murG	2.4.1.227; 6.3.2.8	GT28
MGYG000158371_01285	food_porridge_pulp_adm	1.82096	7.09509e-21	2.48716e-11	glgA	2.4.1.21	GT5
MGYG000017178_01219	breast_feeding	5.41398	1.96263e-21	2.56467e-11	nplT	3.2.1.1	GH13
MGYG000106599_00017	food_porridge_pulp_adm	4.41647	8.43376e-21	2.82541e-11	gtfA	2.4.1.329; 2.4.1.7	GH13
MGYG000026060_00462	food_porridge_pulp_adm	2.66917	9.09138e-21	2.98607e-11		3.2.1.4	GH5; GH9
MGYG000003115_00177	food_animal_milk_adm	1.02181	9.26609e-21	3.02821e-11	treA	3.2.1.28	GH37
MGYG000043831_02560	food_porridge_pulp_adm	1.5949	9.37219e-21	3.05369e-11		3.2.1.177	GH31
MGYG000010155_01883	food_animal_milk_adm	0.867884	9.98415e-21	3.19914e-11		3.2.1.78	GH26
MGYG000207166_01447	food_porridge_pulp_adm	2.46098	1.03489e-20	3.28466e-11	glgP	2.4.1.1	GT35
MGYG000001548_01522	food_animal_milk_adm	0.866146	1.05942e-20	3.3417e-11		3.2.1.55	CBM6; GH43
MGYG000132109_00461	food_porridge_pulp_adm	4.37766	1.09876e-20	3.43243e-11	pulA	3.2.1.41	CBM48; GH13
MGYG000013295_00967	food_porridge_pulp_adm	1.63245	1.25659e-20	3.78773e-11	surA	2.4.1.129; 3.4.16.4	GT51
MGYG000248839_01151	breast_feeding	5.23653	3.07304e-21	3.79681e-11		3.2.1.52	GH20
MGYG000134612_00735	food_porridge_pulp_adm	2.04619	1.26676e-20	3.81018e-11		3.2.1.4	GH5; GH9
MGYG000052044_00800	food_porridge_pulp_adm	2.00181	1.31844e-20	3.9235e-11		3.2.1.51	GH95
MGYG000048145_02492	food_animal_milk_adm	0.855704	1.5198e-20	4.35379e-11		3.2.1.51	GH95
MGYG000242012_01485	food_animal_milk_adm	1.08653	1.76573e-20	4.85816e-11		2.4.1.25	GH77
MGYG000108343_02324	food_animal_milk_adm	0.963979	1.96702e-20	5.25628e-11		3.2.1.177	GH31
MGYG000287888_01302	food_animal_milk_adm	0.96348	1.99303e-20	5.30687e-11		4.2.2.1	PL8
MGYG000068586_00759	food_porridge_pulp_adm	2.01602	2.01052e-20	5.34078e-11	murG	2.4.1.227	GT28
MGYG000090594_00670	food_animal_milk_adm	0.989801	2.07698e-20	5.46888e-11		2.4.1.4; 3.2.1.1; 5.4.99.16	GH13
MGYG000237034_00875	food_porridge_pulp_adm	4.44913	2.09939e-20	5.51181e-11	pulA	3.2.1.41	CBM48; GH13
MGYG000162517_00430	food_porridge_pulp_adm	2.14636	2.26452e-20	5.82423e-11	celM	3.2.1.4	GH5; GH9
MGYG000003032_01291	food_porridge_pulp_adm	1.55588	2.5997e-20	6.4392e-11	glgA	2.4.1.21	GT5
MGYG000219002_01546	breast_feeding	5.58358	5.75912e-21	6.52918e-11	glgX	3.2.1.196; 3.2.1.68	CBM48; GH13
MGYG000139203_00471	food_porridge_pulp_adm	1.99156	2.73385e-20	6.67888e-11		3.2.1.4	GH5; GH9
MGYG000253396_01511	breast_feeding	5.5672	5.93966e-21	6.70398e-11		3.2.1.51	GH29
MGYG000155066_02671	food_animal_milk_adm	0.978566	2.78838e-20	6.77533e-11	pimB	2.4.1.337	GT4
MGYG000015075_00218	food_porridge_pulp_adm	1.55217	2.92139e-20	7.00838e-11	glgA	2.4.1.21	GT5
MGYG000006576_00557	food_animal_milk_adm	1.58234	3.44933e-20	7.90502e-11		2.4.1.64; 2.4.1.8	GH65
MGYG000007568_01320	food_porridge_pulp_adm	2.76877	3.52911e-20	8.03696e-11		2.4.1.109	GT39
MGYG000057526_00137	breast_feeding	5.14342	7.8739e-21	8.52504e-11	bglB	3.2.1.21	GH3
MGYG000085827_00029	food_porridge_pulp_adm	3.47382	3.98449e-20	8.77425e-11	hylB	4.2.2.1	PL8
MGYG000237817_01237	food_porridge_pulp_adm	1.9117	4.1149e-20	8.98081e-11		2.4.1.1	GT35
MGYG000196819_00561	food_porridge_pulp_adm	2.78425	4.56267e-20	9.67607e-11	amyS	3.2.1.1	GH13
MGYG000003975_00648	food_porridge_pulp_adm	2.42346	5.78618e-20	1.1482e-10		3.2.1.21	GH3
MGYG000013141_00373	breast_feeding	5.02028	1.18191e-20	1.20157e-10		3.2.1.21	GH3
MGYG000000560_00948	food_animal_milk_adm	0.920706	6.45719e-20	1.24242e-10	mrcA	2.4.1.129; 3.4.16.4	GT51
MGYG000135372_00085	food_porridge_pulp_adm	3.47099	8.18542e-20	1.47276e-10		1.1.3.9; 3.2.1.4	GH5; GH9
MGYG000279381_01437	breast_feeding	4.4803	1.53372e-20	1.4947e-10	ams	2.4.1.4	GH13
MGYG000185067_04944	food_porridge_pulp_adm	2.60882	9.13977e-20	1.5937e-10		2.4.1.291	GT4
MGYG000004439_01929	food_porridge_pulp_adm	2.72913	9.1573e-20	1.59588e-10	dpm1	2.4.1.83	GT2
MGYG000062516_00309	food_porridge_pulp_adm	2.77407	9.62242e-20	1.65341e-10		3.2.1.133; 3.2.1.135; 3.2.1.54; 3.5.4.33	GH13
MGYG000141551_01227	food_porridge_pulp_adm	1.72759	1.01602e-19	1.71892e-10		3.2.1.133; 3.2.1.135; 3.2.1.54; 3.5.4.33	GH13
MGYG000053530_01392	food_porridge_pulp_adm	1.43058	1.02942e-19	1.73506e-10		3.2.1.1	GH13
MGYG000012709_01905	food_porridge_pulp_adm	1.34096	1.03584e-19	1.74279e-10		3.2.1.82	GH28
MGYG000017374_00723	breast_feeding	5.52947	1.85882e-20	1.75429e-10	glgP	2.4.1.1	GT35
MGYG000206645_01098	breast_feeding	5.46381	2.07782e-20	1.92414e-10		3.2.1.20	GH31
MGYG000268712_00582	food_porridge_pulp_adm	1.66858	1.23452e-19	1.97511e-10		3.2.1.86	GT1
MGYG000071571_00261	breast_feeding	3.72699	2.50366e-20	2.24471e-10	amyX	3.2.1.41	CBM48; GH13
MGYG000105468_00635	food_porridge_pulp_adm	3.06341	1.48752e-19	2.25526e-10	murG	2.4.1.227; 6.3.2.8	GT28
MGYG000004092_00102	food_porridge_pulp_adm	2.51183	1.51015e-19	2.27959e-10	treA	3.2.1.10; 3.2.1.93	GH13
MGYG000255653_01361	food_porridge_pulp_adm	1.97656	1.72638e-19	2.50678e-10		3.2.1.156	GH8
MGYG000180975_02319	food_porridge_pulp_adm	3.08331	1.75276e-19	2.53389e-10		2.4.1.64	GH65
MGYG000003515_00697	food_animal_milk_adm	0.912691	1.7796e-19	2.56134e-10		3.2.1.51	GH95
MGYG000013709_00597	food_porridge_pulp_adm	1.81243	1.7938e-19	2.57581e-10		3.2.1.37	GH43
MGYG000059986_01895	food_porridge_pulp_adm	3.05174	2.73187e-19	3.46807e-10		3.2.1.78	GH26
MGYG000003532_01524	food_animal_milk_adm	0.965365	2.81078e-19	3.5384e-10	glgB	2.4.1.18	CBM48; GH13
MGYG000003616_00083	food_animal_milk_adm	0.871172	2.86472e-19	3.58613e-10		2.4.1.20	GT36
MGYG000269929_00483	food_porridge_pulp_adm	5.24857	3.12462e-19	3.81233e-10		3.2.1.177	GH31
MGYG000270247_01699	breast_feeding	4.27002	5.34614e-20	4.17067e-10		3.2.1.26	GH32
MGYG000210334_00797	food_porridge_pulp_adm	3.29859	4.00953e-19	4.54262e-10	glgP	2.4.1.1; 2.4.1.11; 2.4.1.8	GH65; GT3; GT35
MGYG000104768_00617	food_porridge_pulp_adm	2.51202	4.06388e-19	4.58574e-10		2.4.1.83	GT2
MGYG000218374_00080	breast_feeding	5.59579	6.21638e-20	4.71052e-10	murG	2.4.1.227; 6.3.2.8	GT28
MGYG000064327_00444	food_animal_milk_adm	0.882212	4.53592e-19	4.95302e-10	susB	3.2.1.20; 3.2.1.3	GH31; GH97
MGYG000002474_01942	food_animal_milk_adm	0.879646	4.91946e-19	5.24271e-10	glgP	2.4.1.1	GT35
MGYG000002226_00019	food_porridge_pulp_adm	2.21764	4.9203e-19	5.24333e-10	murG	2.4.1.227	GT28
MGYG000096172_00552	food_porridge_pulp_adm	2.50812	5.30139e-19	5.52423e-10	spr	3.4.17.13	CBM50
MGYG000004382_01642	food_porridge_pulp_adm	2.67715	5.66346e-19	5.78529e-10	cbpD	3.2.1.96; 3.4.17.14; 3.5.1.28; 3.5.1.78; 6.3.1.8	CBM50
MGYG000004201_00574	food_porridge_pulp_adm	2.01353	5.69203e-19	5.80567e-10		3.2.1.51	GH29
MGYG000062916_01174	breast_feeding	5.56034	8.14093e-20	5.84924e-10		3.2.1.51	GH29
MGYG000251007_01169	food_porridge_pulp_adm	1.56509	5.8263e-19	5.90099e-10	malP_1	2.4.1.1	GT35
MGYG000062516_01620	food_porridge_pulp_adm	2.77359	5.87573e-19	5.93591e-10		3.2.1.1	GH13
MGYG000195464_00355	breast_feeding	4.91374	8.80128e-20	6.22542e-10		3.2.1.20	GH31
MGYG000062516_02249	food_porridge_pulp_adm	2.76585	6.41725e-19	6.3126e-10	glgP	2.4.1.1	GT35
MGYG000157009_01025	food_animal_milk_adm	0.932518	6.64501e-19	6.46801e-10		3.2.1.52	GH20
MGYG000258641_00814	food_animal_milk_adm	1.52001	6.8758e-19	6.62379e-10		3.2.1.45	GH30
MGYG000004439_00274	food_porridge_pulp_adm	2.12269	7.00938e-19	6.71319e-10	malQ	2.4.1.25	GH77
MGYG000180729_00596	food_animal_milk_adm	1.49855	8.01671e-19	7.37096e-10		3.2.1.51	GH95
MGYG000112950_01312	food_porridge_pulp_adm	2.41865	8.19668e-19	7.48565e-10	lytB	3.5.1.28	GH23
MGYG000013839_00691	food_porridge_pulp_adm	2.01341	8.35419e-19	7.58537e-10		2.4.1.129; 3.4.16.4	GT51
MGYG000010162_00412	breast_feeding	5.57521	1.16585e-19	7.78565e-10		3.2.1.18	GH33
MGYG000000300_00294	food_porridge_pulp_adm	1.86906	9.33732e-19	8.19485e-10		2.4.2.53	GT2
MGYG000035253_00692	breast_feeding	3.50758	1.30345e-19	8.50437e-10	pulA	3.2.1.41	CBM48; GH13
MGYG000085462_00591	food_porridge_pulp_adm	2.80215	1.02557e-18	8.74592e-10		2.4.1.348	GT4
MGYG000234832_00293	food_porridge_pulp_adm	3.03768	1.0481e-18	8.87868e-10		3.2.1.78	GH26
MGYG000022644_00031	breast_feeding	4.55586	1.38794e-19	8.93678e-10	malL	2.4.1.4; 3.2.1.1; 3.2.1.20; 5.4.99.16	GH13; GH31
MGYG000244584_01193	food_porridge_pulp_adm	2.43518	1.11406e-18	9.2622e-10		2.4.1.348	GT4
MGYG000168990_00955	breast_feeding	4.2582	1.54016e-19	9.70049e-10	apuB	3.2.1.41; 3.2.1.68	CBM48; GH13
MGYG000090641_00534	food_porridge_pulp_adm	1.85261	1.20708e-18	9.79089e-10		3.2.1.1	GH13
MGYG000115644_00612	breast_feeding	5.61054	1.69157e-19	1.04424e-09	glgE	2.4.99.16	GH13
MGYG000189246_02610	food_porridge_pulp_adm	4.35326	1.42808e-18	1.09973e-09		3.2.1.21	GH3
MGYG000217051_01477	food_porridge_pulp_adm	2.4878	1.47261e-18	1.12328e-09	lacZ	3.2.1.23; 3.2.1.52	GH20
MGYG000128410_00183	food_porridge_pulp_adm	2.00155	1.6391e-18	1.2094e-09	glgB	2.4.1.18	CBM48; GH13
MGYG000241338_02313	food_porridge_pulp_adm	1.93114	1.67311e-18	1.22664e-09	abfA	3.2.1.55	GH51
MGYG000158220_00294	food_porridge_pulp_adm	2.7926	1.74074e-18	1.26058e-09		2.4.1.315	GT28
MGYG000004850_01788	food_porridge_pulp_adm	2.33367	2.0286e-18	1.40053e-09		3.2.1.55	GH51
MGYG000065735_00096	food_porridge_pulp_adm	2.03154	2.28462e-18	1.51963e-09		3.2.1.21	GH3
MGYG000231420_01637	food_porridge_pulp_adm	1.41356	2.67241e-18	1.69206e-09	pulA	3.2.1.41	CBM48; GH13
MGYG000090604_03455	food_animal_milk_adm	1.67	2.90258e-18	1.7905e-09		3.2.1.21	GH3
MGYG000004841_01982	food_animal_milk_adm	1.45348	2.90721e-18	1.79245e-09	lpxK	2.4.99.12; 2.4.99.13; 2.4.99.14; 2.4.99.15	GT30
MGYG000224493_02090	food_porridge_pulp_adm	1.90617	2.9415e-18	1.80689e-09	glgP	2.4.1.1	GT35
MGYG000082366_00198	breast_feeding	4.97364	3.67344e-19	1.90787e-09		3.2.1.52	GH20
MGYG000004727_00830	food_porridge_pulp_adm	1.59016	3.29563e-18	1.95287e-09		3.2.1.21	GH3
MGYG000255848_01730	food_porridge_pulp_adm	2.42151	3.30491e-18	1.95662e-09		2.4.1.291	GT4
MGYG000170068_01196	food_porridge_pulp_adm	2.25326	3.46764e-18	2.0219e-09	glgB	2.4.1.18	CBM48; GH13
MGYG000115644_01479	breast_feeding	5.45722	4.27727e-19	2.14439e-09		3.2.1.51	GH29
MGYG000001052_02128	food_animal_milk_adm	1.1988	3.89006e-18	2.18679e-09		3.2.1.21	GH3
MGYG000199376_00324	food_porridge_pulp_adm	2.71748	3.95081e-18	2.21e-09	celA2	3.2.1.4	GH5; GH9
MGYG000003104_00515	food_porridge_pulp_adm	4.99653	4.00325e-18	2.22994e-09		3.2.1.55	CBM6; GH43
MGYG000047694_01329	food_porridge_pulp_adm	2.4634	4.05731e-18	2.25041e-09		3.2.1.133; 3.2.1.135; 3.2.1.54; 3.5.4.33	GH13
MGYG000258881_00027	food_porridge_pulp_adm	2.05601	4.23029e-18	2.31531e-09		2.4.1.129; 3.4.16.4	GT51
MGYG000220788_01385	food_animal_milk_adm	1.25726	4.54976e-18	2.43289e-09	mrcA	2.4.1.129; 3.4.16.4	GT51
MGYG000160689_01087	food_porridge_pulp_adm	2.2472	4.75453e-18	2.50682e-09		3.2.1.4	GH5; GH9
MGYG000068846_01419	food_porridge_pulp_adm	1.58461	5.65412e-18	2.81981e-09		2.4.1.25	GH77
MGYG000004854_00063	food_porridge_pulp_adm	1.36003	5.72715e-18	2.84446e-09		3.2.1.4	GH5; GH9
MGYG000046670_01326	food_porridge_pulp_adm	5.17313	5.83629e-18	2.8811e-09		2.4.1.337	GT4
MGYG000082575_00097	food_porridge_pulp_adm	2.48617	6.36081e-18	3.05409e-09		2.4.1.83	GT2
MGYG000006991_00354	food_porridge_pulp_adm	2.48187	7.89224e-18	3.53374e-09		2.4.1.315	GT28
MGYG000023882_01057	food_porridge_pulp_adm	2.70051	7.94431e-18	3.54947e-09		2.4.1.109	GT39
MGYG000112011_00654	food_porridge_pulp_adm	2.50701	8.7141e-18	3.77806e-09	vpr	2.7.11.1; 3.1.3.90; 3.1.4.12; 3.2.1.4; 3.2.1.8; 3.2.1.81; 3.2.1.82; 3.4.16.4; 3.4.21.96	GH28; GH5; GH9
MGYG000093427_02314	food_porridge_pulp_adm	2.92015	8.72661e-18	3.78171e-09		4.2.2.23	PL11
MGYG000158855_02809	food_animal_milk_adm	1.97014	9.01147e-18	3.86451e-09	bglA	3.2.1.86	GT1
MGYG000247161_00132	food_porridge_pulp_adm	1.44888	9.4358e-18	3.98622e-09		4.2.2.23	PL11
MGYG000018591_00211	food_porridge_pulp_adm	2.59347	9.55067e-18	4.01884e-09	ams	2.4.1.4	GH13
MGYG000004439_01708	food_porridge_pulp_adm	2.24227	9.96247e-18	4.13473e-09		3.2.1.55	GH51
MGYG000164503_00025	food_porridge_pulp_adm	1.4649	1.06796e-17	4.33273e-09	glgA	2.4.1.21	GT5
MGYG000038325_00038	food_porridge_pulp_adm	2.97982	1.0752e-17	4.35247e-09	ponA	2.4.1.129; 3.4.16.4	GT51
MGYG000072703_01726	food_porridge_pulp_adm	1.50657	1.10368e-17	4.42966e-09		2.4.1.129; 3.4.16.4	GT51
MGYG000210707_00579	food_porridge_pulp_adm	4.45625	1.17282e-17	4.6143e-09		3.2.1.37	GH43
MGYG000004082_01228	food_porridge_pulp_adm	1.93141	1.33052e-17	5.02207e-09		3.2.1.133; 3.2.1.135; 3.2.1.54; 3.5.4.33	GH13
MGYG000084323_00736	food_porridge_pulp_adm	2.15829	1.41734e-17	5.23947e-09	murG	2.4.1.227	GT28
MGYG000062516_00325	food_porridge_pulp_adm	2.5999	1.44604e-17	5.31033e-09		3.2.1.1	GH13
MGYG000000426_00013	food_porridge_pulp_adm	2.14483	1.44753e-17	5.31399e-09	ponA	2.4.1.129; 3.4.16.4	GT51
MGYG000126389_01850	food_porridge_pulp_adm	4.23666	1.47777e-17	5.38811e-09	cpoA	2.4.1.208	GT4
MGYG000003513_02014	food_porridge_pulp_adm	1.39376	1.57157e-17	5.61474e-09	mrcA	2.4.1.129; 3.4.16.4	GT51
MGYG000001082_02162	food_porridge_pulp_adm	1.35453	1.72664e-17	5.97948e-09		3.2.1.1	GH13
MGYG000097711_01555	food_gutthi_gripe_adm	1.68403	1.82887e-17	6.21377e-09		3.2.1.18	GH33
MGYG000006623_01659	food_porridge_pulp_adm	1.86323	1.86721e-17	6.30046e-09		3.2.1.177; 3.2.1.52	GH31
MGYG000138813_01943	food_porridge_pulp_adm	2.43693	2.00259e-17	6.6018e-09		3.2.1.4	GH5; GH9
MGYG000120775_02517	food_porridge_pulp_adm	2.7324	2.046e-17	6.6969e-09		2.4.1.348	GT4
MGYG000079330_00185	food_formula_powder_milk_adm	0.911837	2.09075e-17	6.79422e-09		4.2.2.23	PL11
MGYG000254474_01091	food_animal_milk_adm	1.4343	2.10995e-17	6.83577e-09		2.4.1.337	GT4
MGYG000006871_00387	food_porridge_pulp_adm	2.06719	2.17541e-17	6.9764e-09		2.4.1.129; 3.4.16.4	GT51
MGYG000004850_01716	food_porridge_pulp_adm	2.68314	2.43562e-17	7.52153e-09		3.2.1.4	GH5; GH9
MGYG000030216_00888	breast_feeding	5.29872	2.36616e-18	7.73059e-09	fosC	3.2.1.26	GH32
MGYG000037496_00308	food_animal_milk_adm	0.76993	2.62566e-17	7.90694e-09		3.2.1.14; 4.2.2.2	GH18
MGYG000102903_02075	food_animal_milk_adm	2.65533	2.68087e-17	8.01706e-09	pulA	3.2.1.41	CBM48; GH13
MGYG000084323_00781	food_porridge_pulp_adm	2.2294	2.75818e-17	8.16995e-09	sacC2	3.2.1.65; 3.2.1.80	GH32
MGYG000101135_01043	food_porridge_pulp_adm	2.88333	2.82686e-17	8.30452e-09		4.2.2.23	PL11
MGYG000055999_00566	food_porridge_pulp_adm	2.01241	2.86777e-17	8.38413e-09		2.4.1.11	GT4
MGYG000050506_00920	breast_feeding	4.18449	2.67478e-18	8.45641e-09		3.2.1.24	GH38
MGYG000071348_01422	food_porridge_pulp_adm	5.067	2.93459e-17	8.51332e-09		3.2.1.20	GH31
MGYG000263299_00781	food_gutthi_gripe_adm	3.22604	3.02959e-17	8.69524e-09	murG	2.4.1.227	GT28
MGYG000136760_01041	food_porridge_pulp_adm	2.42778	3.24966e-17	9.10918e-09	cepA	2.4.1.20	GT36
MGYG000016508_00322	breast_feeding	4.66897	3.05959e-18	9.32767e-09		3.2.1.20	GH31
MGYG000006991_00003	food_porridge_pulp_adm	2.06334	3.62121e-17	9.78645e-09		2.4.1.230	GH65
MGYG000084323_00130	food_porridge_pulp_adm	2.23867	3.65356e-17	9.84423e-09		3.1.3.5; 3.6.1.45; 4.2.2.2; 4.2.2.5	PL8
MGYG000001485_01259	food_porridge_pulp_adm	1.98538	3.7635e-17	1.00393e-08	glgA	2.4.1.21	GT5
MGYG000276100_03203	food_animal_milk_adm	1.66011	3.86212e-17	1.02126e-08	celC	3.2.1.4	GH5; GH9
MGYG000063200_03146	food_animal_milk_adm	2.46669	4.03302e-17	1.05092e-08		3.2.1.177	GH31
MGYG000244614_01453	food_porridge_pulp_adm	3.37276	4.66423e-17	1.15684e-08	mrcA	2.4.1.129; 3.4.16.4	GT51
MGYG000164619_01299	food_porridge_pulp_adm	3.00953	4.90294e-17	1.19556e-08		3.2.1.4	GH5; GH9
MGYG000018735_00259	food_porridge_pulp_adm	1.22968	5.18979e-17	1.24121e-08		3.2.1.51	GH95
MGYG000280720_00143	food_porridge_pulp_adm	2.51686	5.20527e-17	1.24365e-08		2.4.1.11	GT4
MGYG000166377_02153	food_porridge_pulp_adm	1.81393	5.9363e-17	1.35602e-08		3.2.1.18	GH33
MGYG000110982_00327	food_porridge_pulp_adm	2.3024	6.04915e-17	1.37292e-08		2.4.1.129; 3.4.16.4	GT51
MGYG000033739_00886	food_porridge_pulp_adm	5.1674	6.0687e-17	1.37584e-08	murG	2.4.1.227	GT28
MGYG000040187_00037	food_gutthi_gripe_adm	1.74128	6.49261e-17	1.43826e-08	treC	3.2.1.93	GH13
MGYG000227127_01037	food_gutthi_gripe_adm	1.74126	6.49304e-17	1.43833e-08		3.2.1.21; 3.2.1.86	GT1
MGYG000034235_00434	food_animal_milk_adm	1.92447	6.55174e-17	1.44686e-08		3.2.1.177	GH31
MGYG000122942_01244	food_gutthi_gripe_adm	1.39333	6.61186e-17	1.45556e-08		3.2.1.51	GH29
MGYG000264929_01425	food_gutthi_gripe_adm	1.38398	6.96066e-17	1.50553e-08	arbA_2	3.2.1.99	GH43
MGYG000068918_00528	food_gutthi_gripe_adm	1.71626	7.10431e-17	1.52585e-08	mngB	3.2.1.170	GH38
MGYG000073963_02389	food_gutthi_gripe_adm	1.37938	7.14117e-17	1.53104e-08		3.2.1.135	GH13
MGYG000169946_00011	food_gutthi_gripe_adm	1.71434	7.15466e-17	1.53293e-08		3.2.1.51	GH29
MGYG000060316_00758	food_gutthi_gripe_adm	1.39162	7.66037e-17	1.60315e-08		3.2.1.1	GH13
MGYG000123153_01388	food_gutthi_gripe_adm	1.36527	7.73446e-17	1.6133e-08	nanH	3.2.1.18	GH33
MGYG000064626_01462	food_porridge_pulp_adm	4.04598	7.78995e-17	1.62087e-08		3.2.1.21	GH3
MGYG000038294_00526	food_porridge_pulp_adm	2.24715	7.81088e-17	1.62373e-08	mtgA	2.4.1.129	GT51
MGYG000180702_02247	food_gutthi_gripe_adm	1.36309	7.83193e-17	1.62659e-08		3.2.1.21	GH3
MGYG000088202_00480	food_gutthi_gripe_adm	1.35805	8.06335e-17	1.65792e-08	bglB	3.2.1.21	GH3
MGYG000207259_01124	food_gutthi_gripe_adm	1.35533	8.1917e-17	1.67516e-08		3.2.1.52	GH20
MGYG000232233_01127	food_porridge_pulp_adm	3.01774	8.49467e-17	1.71547e-08	amyA2	3.2.1.135	GH13
MGYG000160817_01493	food_porridge_pulp_adm	3.21676	8.60705e-17	1.73029e-08		3.2.1.4; 3.2.1.52	GH5; GH9
MGYG000230106_00768	food_gutthi_gripe_adm	1.3447	8.72046e-17	1.74518e-08		3.2.1.52	GH20
MGYG000010302_00220	breast_feeding	4.60566	7.77898e-18	1.82538e-08		3.2.1.26	GH32
MGYG000037626_01487	food_gutthi_gripe_adm	1.32765	9.66469e-17	1.86654e-08	eglS	3.2.1.4	GH5; GH9
MGYG000199446_00122	food_porridge_pulp_adm	3.05704	9.75458e-17	1.87787e-08		3.2.1.51	GH29
MGYG000004850_00967	food_porridge_pulp_adm	2.31397	9.83785e-17	1.88833e-08	gtfA	2.4.1.329; 2.4.1.7	GH13
MGYG000281206_01161	food_porridge_pulp_adm	5.08276	9.94318e-17	1.90151e-08		2.4.1.129; 3.4.16.4	GT51
MGYG000042970_01968	food_gutthi_gripe_adm	1.32143	1.00423e-16	1.91387e-08		3.2.1.21	GH3
MGYG000260425_00034	food_porridge_pulp_adm	2.11241	1.01707e-16	1.92981e-08		2.4.1.129; 3.4.16.4	GT51
MGYG000139049_02452	food_gutthi_gripe_adm	1.31284	1.0595e-16	1.98201e-08		3.2.1.78	GH26
MGYG000085870_00787	food_porridge_pulp_adm	5.26085	1.19151e-16	2.13975e-08		3.2.1.4	GH5; GH9
MGYG000218474_01394	food_porridge_pulp_adm	2.99236	1.20073e-16	2.15053e-08		3.2.1.177; 3.2.1.20	GH31
MGYG000027521_01437	food_gutthi_gripe_adm	1.5778	1.24208e-16	2.1985e-08		3.2.1.14	GH18
MGYG000000838_00850	food_porridge_pulp_adm	2.15349	1.32223e-16	2.28985e-08	celM	3.2.1.4	GH5; GH9
MGYG000006727_00119	food_porridge_pulp_adm	2.52608	1.34614e-16	2.31671e-08		3.2.1.37; 3.2.1.55	GH43; GH51
MGYG000092459_00426	food_animal_milk_adm	1.76727	1.43179e-16	2.41154e-08	malQ	2.4.1.25	GH77
MGYG000190334_00244	breast_feeding	4.19861	1.26403e-17	2.57199e-08		3.2.1.51	GH95
MGYG000277735_04465	food_animal_milk_adm	1.66076	1.6688e-16	2.66379e-08		3.2.1.37	GH43
MGYG000225878_02210	food_gutthi_gripe_adm	1.22853	1.87965e-16	2.87739e-08		3.2.1.51	GH29
MGYG000269090_00690	breast_feeding	3.47434	1.52284e-17	2.93027e-08		3.2.1.20	GH31
MGYG000126605_01509	food_porridge_pulp_adm	2.92399	2.08761e-16	3.07963e-08	celA	3.2.1.4	GH5; GH9
MGYG000005129_00491	food_porridge_pulp_adm	1.85536	2.09853e-16	3.09003e-08	murG	2.4.1.227	GT28
MGYG000062894_03109	food_gutthi_gripe_adm	1.45896	2.21262e-16	3.19764e-08		3.2.1.21	GH3
MGYG000231953_00517	food_porridge_pulp_adm	2.00779	2.23177e-16	3.2155e-08	glgP	2.4.1.1	GT35
MGYG000000913_01166	food_animal_milk_adm	1.44551	2.25947e-16	3.24124e-08	murG	2.4.1.227	GT28
MGYG000058530_01140	food_porridge_pulp_adm	5.21418	2.40421e-16	3.37388e-08		2.4.1.129; 3.4.16.4	GT51
MGYG000038889_02228	food_animal_milk_adm	0.946316	2.4094e-16	3.37858e-08		3.2.1.172	GH105
MGYG000000221_02838	food_gutthi_gripe_adm	1.44111	2.43575e-16	3.40239e-08		3.2.1.51	GH95
MGYG000024289_02249	food_porridge_pulp_adm	4.07241	2.44569e-16	3.41135e-08	amyA2	3.2.1.1	GH13
MGYG000000221_00626	food_gutthi_gripe_adm	1.4297	2.59365e-16	3.54313e-08		2.4.1.10	GH68
MGYG000001761_01386	food_porridge_pulp_adm	1.71961	2.62962e-16	3.57474e-08		3.2.1.86	GT1
MGYG000149323_00857	food_porridge_pulp_adm	3.10016	2.73584e-16	3.66718e-08	malQ	2.4.1.25	GH77
MGYG000194559_00046	food_gutthi_gripe_adm	1.41858	2.76051e-16	3.68846e-08		2.4.1.346	GT4
MGYG000214132_00949	food_porridge_pulp_adm	3.2655	2.96772e-16	3.8645e-08		3.2.1.4; 3.2.1.8	GH5; GH9
MGYG000003390_03382	food_porridge_pulp_adm	1.45733	3.00276e-16	3.89382e-08	otsA	2.4.1.15; 2.4.1.347	GT20
MGYG000024875_01812	breast_feeding	4.62291	2.46419e-17	4.09249e-08	glgA	2.4.1.342	GT4
MGYG000249261_00364	food_animal_milk_adm	0.982308	3.39328e-16	4.21242e-08		3.2.1.51	GH95
MGYG000261545_00414	food_porridge_pulp_adm	3.10636	3.79023e-16	4.52261e-08		3.2.1.78	GH26
MGYG000142909_00500	food_porridge_pulp_adm	4.60824	3.81409e-16	4.54086e-08	malQ_1	2.4.1.25	GH77
MGYG000002229_00023	food_porridge_pulp_adm	1.53176	3.94376e-16	4.63931e-08	murG	2.4.1.227	GT28
MGYG000004439_00978	food_porridge_pulp_adm	1.93824	4.03297e-16	4.70635e-08		3.2.1.21	GH3
MGYG000141939_00274	food_porridge_pulp_adm	1.12053	4.0568e-16	4.72416e-08		3.2.1.14	GH18
MGYG000151342_00169	food_porridge_pulp_adm	2.11108	4.26066e-16	4.87499e-08		3.2.1.4	GH5; GH9
MGYG000225348_02546	food_gutthi_gripe_adm	1.32722	4.81565e-16	5.27256e-08	amyA	2.4.1.25	GH57
MGYG000227031_02017	food_porridge_pulp_adm	1.46188	4.85138e-16	5.29755e-08	glgP	2.4.1.1	GT35
MGYG000258967_00467	food_porridge_pulp_adm	1.99969	4.90596e-16	5.3356e-08		3.2.1.1; 3.2.1.11; 3.2.1.78; 3.2.1.8; 3.2.1.80; 3.2.1.89	GH13; GH26; GH66
MGYG000151252_00484	food_porridge_pulp_adm	1.95976	5.2455e-16	5.56882e-08		3.2.1.78	GH26
MGYG000004439_01056	food_porridge_pulp_adm	1.9888	5.52428e-16	5.7561e-08		3.1.3.5; 3.6.1.45; 4.2.2.2; 4.2.2.5	PL8
MGYG000000908_00999	food_porridge_pulp_adm	5.0957	5.87931e-16	5.98956e-08		2.4.1.9	GH68
MGYG000240182_01890	food_gutthi_gripe_adm	1.12443	6.05063e-16	6.10032e-08		2.4.1.129; 3.4.16.4	GT51
MGYG000033058_00835	food_animal_milk_adm	1.50123	6.05306e-16	6.10188e-08	amyA2	3.2.1.1	GH13
MGYG000100712_01181	food_porridge_pulp_adm	2.00371	6.17648e-16	6.18093e-08		3.2.1.1; 3.2.1.10	GH13
MGYG000051453_00886	food_porridge_pulp_adm	2.68232	6.36358e-16	6.29965e-08		4.2.2.23	PL11
MGYG000062590_01645	food_porridge_pulp_adm	2.6681	6.3797e-16	6.30981e-08		3.2.1.78	GH26
MGYG000224569_00763	food_animal_milk_adm	2.35865	6.84216e-16	6.59748e-08		3.2.1.52	GH20
MGYG000096843_02269	food_gutthi_gripe_adm	1.07132	7.26635e-16	6.85497e-08	eglS	3.2.1.4	GH5; GH9
MGYG000205446_00903	food_porridge_pulp_adm	5.15338	7.42988e-16	6.95271e-08		3.2.1.4	GH5; GH9
MGYG000016162_00383	food_porridge_pulp_adm	3.08766	7.50848e-16	6.99941e-08		3.2.1.51	GH29
MGYG000197172_00397	food_porridge_pulp_adm	1.77515	8.2047e-16	7.40522e-08		3.2.1.52	GH20
MGYG000148017_03128	food_gutthi_gripe_adm	1.09087	8.65308e-16	7.65969e-08		2.4.1.280	GH94
MGYG000110737_01669	food_porridge_pulp_adm	6.0505	9.4993e-16	8.12674e-08	murG	2.4.1.227	GT28
MGYG000151135_01664	food_porridge_pulp_adm	1.44972	1.26302e-15	9.732e-08		3.2.1.4	GH5; GH9
MGYG000053244_02590	food_porridge_pulp_adm	1.84225	1.28525e-15	9.8398e-08		3.2.1.51	GH95
MGYG000033237_00370	food_porridge_pulp_adm	1.9359	1.31115e-15	9.96451e-08	surA	2.4.1.129; 3.4.16.4	GT51
MGYG000236159_00078	food_porridge_pulp_adm	5.06188	1.33061e-15	1.00576e-07		3.2.1.51	GH29
MGYG000084912_02102	breast_feeding	4.30312	9.78215e-17	1.04147e-07		3.2.1.4; 3.2.1.58	GH5; GH9
MGYG000202178_01416	food_porridge_pulp_adm	1.83699	1.4392e-15	1.05679e-07		3.2.1.133; 3.2.1.135; 3.2.1.54; 3.5.4.33	GH13
MGYG000173381_02236	food_gutthi_gripe_adm	1.0055	1.47517e-15	1.07336e-07		2.4.1.304	GT26
MGYG000000132_01725	food_porridge_pulp_adm	4.64574	1.55221e-15	1.10834e-07	dgs	2.4.1.208	GT4
MGYG000149043_01467	food_porridge_pulp_adm	3.80862	1.56289e-15	1.11314e-07		3.2.1.18	GH33
MGYG000079496_01001	food_porridge_pulp_adm	2.63634	1.63527e-15	1.14532e-07	damX	3.2.1.4; 3.2.1.78; 4.2.2.23	GH26; GH5; GH9; PL11
MGYG000141192_00133	food_porridge_pulp_adm	2.40215	1.66912e-15	1.16018e-07		4.1.1.105; 4.1.1.28	GH23
MGYG000240716_01204	food_porridge_pulp_adm	2.3233	1.72507e-15	1.1845e-07	gtfB	2.4.1.5	GH13
MGYG000004850_00314	food_porridge_pulp_adm	2.44806	1.77756e-15	1.20703e-07		2.4.1.109	GT39
MGYG000215277_00095	food_porridge_pulp_adm	2.57015	1.83594e-15	1.2318e-07		4.2.2.1	PL8
MGYG000133087_00075	food_animal_milk_adm	1.64563	1.8632e-15	1.24326e-07	bglB	3.2.1.21	GH3
MGYG000004727_00595	food_porridge_pulp_adm	1.57271	1.90738e-15	1.2617e-07	bglB	3.2.1.21	GH3
MGYG000149024_02046	food_porridge_pulp_adm	2.05651	1.92652e-15	1.26964e-07		3.2.1.133; 3.2.1.135; 3.2.1.54	GH13
MGYG000109022_01532	food_porridge_pulp_adm	2.17512	2.09131e-15	1.33676e-07	bglA	3.2.1.86	GT1
MGYG000189261_00223	food_porridge_pulp_adm	1.74968	2.12488e-15	1.35018e-07	iap	3.2.1.4; 3.4.11.10; 3.4.11.24; 3.4.11.6	CE10; GH5; GH9
MGYG000185245_01030	food_gutthi_gripe_adm	1.00904	2.13509e-15	1.35424e-07		3.2.1.51	GH95
MGYG000180568_01612	breast_feeding	5.09471	1.5e-16	1.38195e-07		3.2.1.51	GH95
MGYG000254215_01712	food_porridge_pulp_adm	2.81694	2.2334e-15	1.39301e-07		4.2.2.1	PL8
MGYG000239896_00653	food_animal_milk_adm	1.44754	2.32001e-15	1.42661e-07		3.2.1.18	GH33
MGYG000002437_01875	food_gutthi_gripe_adm	0.997893	2.39674e-15	1.45598e-07		3.2.1.21	GH3
MGYG000035460_00534	food_porridge_pulp_adm	2.62952	2.39714e-15	1.45614e-07		3.2.1.21	GH3
MGYG000051879_00516	food_porridge_pulp_adm	2.71791	2.41208e-15	1.46181e-07		2.4.1.187	GT26
MGYG000012839_01290	food_porridge_pulp_adm	3.73602	2.41875e-15	1.46434e-07	malQ	2.4.1.25	GH77
MGYG000025104_00355	food_porridge_pulp_adm	3.25143	2.50367e-15	1.49631e-07		3.2.1.78	GH26
MGYG000057191_00888	food_animal_milk_adm	2.40716	2.6529e-15	1.5515e-07		3.2.1.14; 3.2.1.4	GH18; GH5; GH9
MGYG000245286_00330	food_porridge_pulp_adm	1.88113	2.68066e-15	1.56163e-07		3.2.1.51	GH29
MGYG000219411_00281	food_gutthi_gripe_adm	0.955625	2.7072e-15	1.57127e-07		3.2.1.172	GH105
MGYG000038504_00462	food_gutthi_gripe_adm	0.988611	2.75518e-15	1.58863e-07		3.2.1.156	GH8
MGYG000157968_01993	food_animal_milk_adm	1.58575	2.90776e-15	1.64303e-07		2.4.1.44	GT8
MGYG000236019_01582	food_gutthi_gripe_adm	0.948702	2.96108e-15	1.66178e-07		2.4.1.129; 3.4.16.4	GT51
MGYG000044761_00867	food_porridge_pulp_adm	1.53504	3.0067e-15	1.67772e-07	recX	2.4.1.337	GT4
MGYG000085078_03897	food_gutthi_gripe_adm	1.09934	3.01373e-15	1.68017e-07		3.2.1.21	GH3
MGYG000092075_01017	food_porridge_pulp_adm	2.77874	3.0382e-15	1.68867e-07		2.4.1.187	GT26
MGYG000000176_01013	food_gutthi_gripe_adm	0.978343	3.04754e-15	1.69191e-07		2.4.1.129; 3.4.16.4	GT51
MGYG000165300_00240	food_porridge_pulp_adm	1.50979	3.30347e-15	1.77919e-07	glgB	2.4.1.18	CBM48; GH13
MGYG000135242_01347	food_porridge_pulp_adm	3.97424	3.35141e-15	1.79525e-07		3.2.1.51	GH95
MGYG000005832_00796	food_gutthi_gripe_adm	0.937391	3.43836e-15	1.82413e-07		3.2.1.52	GH20
MGYG000258967_00449	food_porridge_pulp_adm	2.10025	3.45891e-15	1.83092e-07		3.2.1.177; 3.2.1.20	GH31
MGYG000002476_03503	food_animal_milk_adm	1.11967	3.49513e-15	1.84284e-07	mrcB	2.4.1.129; 3.4.16.4	GT51
MGYG000082163_00987	breast_feeding	5.22412	2.48113e-16	1.92028e-07		3.2.1.10	GH13
MGYG000073698_01700	food_porridge_pulp_adm	1.19083	3.74005e-15	1.92222e-07		3.2.1.172	GH105
MGYG000006896_00867	food_gutthi_gripe_adm	0.95736	3.98864e-15	2.00074e-07	malL	3.2.1.1; 3.2.1.10; 3.2.1.70; 3.2.1.93	GH13
MGYG000156359_01537	food_formula_powder_milk_adm	0.6979	4.22429e-15	2.07342e-07	lacZ	3.2.1.23; 3.2.1.52	GH20
MGYG000255989_01113	food_porridge_pulp_adm	1.55514	4.38455e-15	2.12194e-07	glgP	2.4.1.1	GT35
MGYG000288544_00141	food_porridge_pulp_adm	2.20577	4.46041e-15	2.14467e-07	envE	3.1.4.46; 3.2.1.18; 3.2.1.8	GH33
MGYG000180548_01904	food_gutthi_gripe_adm	0.917236	4.53052e-15	2.16554e-07		3.2.1.133; 3.2.1.135; 3.2.1.54	GH13
MGYG000004439_00147	food_porridge_pulp_adm	2.10551	4.73267e-15	2.22501e-07	dex	3.2.1.11	GH66
MGYG000004850_01715	food_porridge_pulp_adm	2.34263	4.7634e-15	2.23396e-07		3.2.1.4	GH5; GH9
MGYG000048767_02554	food_porridge_pulp_adm	1.61423	4.83649e-15	2.25516e-07	fucA	3.2.1.51	GH29
MGYG000248459_01170	food_porridge_pulp_adm	3.3782	4.93971e-15	2.28489e-07		3.2.1.1	GH13
MGYG000183435_00855	food_gutthi_gripe_adm	0.938913	5.10495e-15	2.33198e-07		3.2.1.21	GH3
MGYG000214236_00832	food_animal_milk_adm	1.22145	5.12413e-15	2.33741e-07		3.2.1.24	GH38
MGYG000011547_01090	food_gutthi_gripe_adm	2.03716	5.18111e-15	2.35348e-07		3.2.1.82	GH28
MGYG000174478_01867	food_gutthi_gripe_adm	1.04599	5.23434e-15	2.36843e-07	ksgA	2.1.1.182	GT2; GT4
MGYG000017329_00356	food_porridge_pulp_adm	5.10494	5.27314e-15	2.3793e-07	sap	3.2.1.1; 3.5.1.28	GH13
MGYG000052915_01961	food_porridge_pulp_adm	2.19371	5.28521e-15	2.38267e-07		3.2.1.51	GH29
MGYG000190979_00037	food_porridge_pulp_adm	1.5395	5.43081e-15	2.42311e-07		4.2.2.5	PL8
MGYG000218010_02233	food_animal_milk_adm	1.25976	5.61548e-15	2.47381e-07		3.2.1.177	GH31
MGYG000262326_01036	food_gutthi_gripe_adm	0.902125	5.6181e-15	2.47452e-07		2.4.1.342	GT4
MGYG000102204_01081	food_porridge_pulp_adm	6.06475	5.68054e-15	2.49151e-07	malQ_1	2.4.1.25	GH77
MGYG000006111_00994	food_gutthi_gripe_adm	0.897668	5.99473e-15	2.57589e-07		3.2.1.20	GH31
MGYG000233479_00652	food_porridge_pulp_adm	1.99156	6.41344e-15	2.68567e-07		2.4.1.83	GT2
MGYG000052770_02218	breast_feeding	4.77537	4.19207e-16	2.69329e-07	bgl2	3.2.1.21	GH3
MGYG000004092_01375	food_porridge_pulp_adm	2.06311	6.64563e-15	2.74533e-07	glgP	2.4.1.1	GT35
MGYG000221038_02778	breast_feeding	4.09404	4.37563e-16	2.76821e-07		3.2.1.133; 3.2.1.135; 3.2.1.54; 3.5.4.33	GH13
MGYG000004850_01185	food_porridge_pulp_adm	2.74426	6.73842e-15	2.76894e-07		3.2.1.55	GH51
MGYG000004589_02025	food_porridge_pulp_adm	1.32028	6.84302e-15	2.7954e-07	malP_1	2.4.1.1	GT35
MGYG000148017_00352	food_gutthi_gripe_adm	0.915705	7.06345e-15	2.85064e-07		2.4.1.187	GT26
MGYG000124388_00617	food_porridge_pulp_adm	1.45066	7.50391e-15	2.95902e-07		3.2.1.4	GH5; GH9
MGYG000232253_01285	food_gutthi_gripe_adm	1.01157	7.7136e-15	3.00972e-07		3.2.1.55	GH51
MGYG000256629_02040	food_animal_milk_adm	1.49617	8.29439e-15	3.14738e-07		3.2.1.21; 3.2.1.52	GH3
MGYG000027041_00786	food_porridge_pulp_adm	2.23431	8.61059e-15	3.22071e-07		2.4.1.315	GT28
MGYG000115731_00998	food_porridge_pulp_adm	1.93168	9.12087e-15	3.33683e-07		1.1.3.9; 3.1.3.5; 3.2.1.4; 3.2.1.78; 3.2.1.8	GH26; GH5; GH9
MGYG000185716_00173	food_porridge_pulp_adm	4.73437	9.29715e-15	3.37633e-07		2.4.1.208	GT4
MGYG000064840_03649	food_animal_milk_adm	1.47793	9.85369e-15	3.49915e-07		3.2.1.21	GH3
MGYG000178943_00091	food_animal_milk_adm	1.57804	1.00585e-14	3.54365e-07		3.2.1.51	GH95
MGYG000113812_00844	food_porridge_pulp_adm	5.85084	1.03542e-14	3.60727e-07		2.4.1.348	GT4
MGYG000177401_00704	food_porridge_pulp_adm	2.31674	1.05189e-14	3.64236e-07		3.2.1.26	GH32
MGYG000252540_01003	food_animal_milk_adm	0.941154	1.07529e-14	3.69189e-07		3.2.1.172	GH105
MGYG000001052_02574	food_animal_milk_adm	1.74593	1.0848e-14	3.71187e-07		3.2.1.133; 3.2.1.135; 3.2.1.54; 3.5.4.33	GH13
MGYG000005609_00824	food_porridge_pulp_adm	2.46539	1.08496e-14	3.71222e-07	xynC1	3.2.1.136	GH5
MGYG000051803_01466	food_animal_milk_adm	1.70379	1.10107e-14	3.74595e-07		2.4.1.83	GT2
MGYG000000421_01248	food_porridge_pulp_adm	2.00699	1.10983e-14	3.7642e-07	amyS	3.2.1.1	GH13
MGYG000006896_01377	food_gutthi_gripe_adm	0.884045	1.1306e-14	3.80723e-07		3.2.1.51	GH29
MGYG000091530_02401	food_porridge_pulp_adm	1.74539	1.14192e-14	3.83055e-07		3.2.1.133; 3.2.1.135; 3.2.1.54; 3.5.4.33	GH13
MGYG000047058_01013	food_porridge_pulp_adm	2.10073	1.22192e-14	3.99284e-07	murG	2.4.1.227; 6.3.2.8	GT28
MGYG000179724_02220	food_gutthi_gripe_adm	0.973146	1.22866e-14	4.00633e-07		3.2.1.20; 3.2.1.3	GH31; GH97
MGYG000149108_01238	food_porridge_pulp_adm	2.01601	1.2647e-14	4.07789e-07		3.2.1.40; 3.2.1.55	CBM6; GH43
MGYG000125058_02711	food_porridge_pulp_adm	2.36804	1.27667e-14	4.10148e-07		3.2.1.21	GH3
MGYG000250337_00556	breast_feeding	4.60034	8.6319e-16	4.25939e-07		3.2.1.10	GH13
MGYG000258967_00010	food_porridge_pulp_adm	2.16316	1.38864e-14	4.31795e-07	dex	3.2.1.11	GH66
MGYG000005337_00859	food_gutthi_gripe_adm	0.840403	1.46773e-14	4.46665e-07		2.4.1.129; 3.4.16.4	GT51
MGYG000262077_01976	food_porridge_pulp_adm	1.58666	1.47045e-14	4.4717e-07	dpm1	2.4.1.83	GT2
MGYG000059297_00920	food_porridge_pulp_adm	2.36071	1.47899e-14	4.48755e-07		2.4.1.129; 3.4.16.4	GT51
MGYG000070458_00079	food_animal_milk_adm	3.61097	1.50357e-14	4.53296e-07	lacM	3.2.1.23; 3.2.1.35; 3.2.1.51; 3.2.1.97	GH101; GH29
MGYG000001461_00467	food_animal_milk_adm	1.0432	1.52638e-14	4.57484e-07		3.2.1.21	GH3
MGYG000066547_01821	food_porridge_pulp_adm	3.67278	1.57498e-14	4.66324e-07	malQ	2.4.1.25	GH77
MGYG000000721_02117	food_animal_milk_adm	1.20195	1.57653e-14	4.66603e-07	malQ_1	2.4.1.25	GH77
MGYG000075265_02713	food_animal_milk_adm	1.28506	1.67496e-14	4.84168e-07		4.2.2.1	PL8
MGYG000179722_00578	breast_feeding	3.78361	1.0639e-15	4.8559e-07	amy	3.2.1.1	GH13
MGYG000075641_01154	breast_feeding	4.80448	1.08583e-15	4.91825e-07	nplT	3.2.1.1	GH13
MGYG000005275_00839	food_animal_milk_adm	1.06564	1.88159e-14	5.19739e-07	susB	3.2.1.20; 3.2.1.3	GH31; GH97
MGYG000003115_02138	food_gutthi_gripe_adm	0.919242	1.90269e-14	5.23279e-07	yafL	3.2.1.14	GH18
MGYG000247020_01122	food_porridge_pulp_adm	1.99179	2.08347e-14	5.52992e-07	bglB	3.2.1.21	GH3
MGYG000062566_02206	food_porridge_pulp_adm	4.75392	2.10912e-14	5.57121e-07		3.2.1.55	GH51
MGYG000235906_00357	food_gutthi_gripe_adm	0.818656	2.13023e-14	5.60505e-07		3.2.1.51	GH29
MGYG000052915_01042	food_porridge_pulp_adm	1.88406	2.16015e-14	5.65278e-07	ompC	2.4.1.10; 3.5.1.28	GH68
MGYG000161943_01918	food_porridge_pulp_adm	1.48076	2.17755e-14	5.68041e-07	lacZ	3.2.1.23; 3.2.1.52	GH20
MGYG000152896_00539	food_gutthi_gripe_adm	1.70877	2.24886e-14	5.79272e-07	mngB	3.2.1.170	GH38
MGYG000006896_03244	food_gutthi_gripe_adm	0.83939	2.32811e-14	5.91584e-07	bglB	3.2.1.21	GH3
MGYG000000695_02085	food_porridge_pulp_adm	3.90021	2.36694e-14	5.97555e-07	amyA2	3.2.1.1	GH13
MGYG000002131_00394	food_animal_milk_adm	0.963439	2.45527e-14	6.10991e-07		3.2.1.51	GH95
MGYG000008360_00877	food_porridge_pulp_adm	1.55274	2.5076e-14	6.18858e-07		3.2.1.18	GH33
MGYG000283029_00807	food_porridge_pulp_adm	2.83155	2.5299e-14	6.2219e-07		1.1.3.9; 3.2.1.4	GH5; GH9
MGYG000155903_00896	food_porridge_pulp_adm	3.07512	2.53723e-14	6.23284e-07		2.7.11.1; 3.2.1.4; 3.2.1.78	GH26; GH5; GH9
MGYG000074160_01912	food_porridge_pulp_adm	5.20289	2.61108e-14	6.34222e-07	ompC	2.4.1.10; 3.5.1.28	GH68
MGYG000003437_01876	food_porridge_pulp_adm	1.56855	2.70581e-14	6.48069e-07		3.2.1.86	GT4
MGYG000159678_00743	food_porridge_pulp_adm	1.80071	2.73723e-14	6.52619e-07		3.2.1.86	GT1
MGYG000055365_00035	food_porridge_pulp_adm	2.7454	2.85574e-14	6.69588e-07	fghA	3.1.2.12	CE1
MGYG000069280_00860	food_porridge_pulp_adm	1.81306	2.97068e-14	6.85774e-07		3.2.1.4	GH5; GH9
MGYG000153489_01393	food_porridge_pulp_adm	1.77137	3.00199e-14	6.90139e-07	glgP	2.4.1.1	GT35
MGYG000119340_00418	food_porridge_pulp_adm	2.52518	3.08486e-14	7.01602e-07	glgA	2.4.1.21	GT5
MGYG000004382_02128	food_porridge_pulp_adm	2.58473	3.15507e-14	7.11216e-07	pulA	3.2.1.41	CBM48; GH13
MGYG000243348_00022	food_porridge_pulp_adm	1.86523	3.29951e-14	7.30723e-07	ugtP	2.4.1.315	GT28
MGYG000048472_00656	food_porridge_pulp_adm	1.78263	3.49919e-14	7.57124e-07		2.4.1.348	GT4
MGYG000087314_01687	food_gutthi_gripe_adm	0.910729	3.59156e-14	7.69127e-07	xlyB	3.5.1.28	CBM50
MGYG000003560_00682	food_porridge_pulp_adm	1.79669	3.60379e-14	7.70707e-07		2.4.1.20	GT36
MGYG000272553_00466	food_porridge_pulp_adm	3.61293	3.8418e-14	8.01024e-07	murG	2.4.1.227	GT28
MGYG000001487_01821	food_porridge_pulp_adm	3.86908	3.92697e-14	8.11685e-07		2.4.1.129; 3.4.16.4	GT51
MGYG000005310_01282	food_animal_milk_adm	1.36144	4.02847e-14	8.24266e-07		3.2.1.99	GH43
MGYG000003379_01364	food_animal_milk_adm	1.24306	4.12923e-14	8.36628e-07	bcsB	2.4.1.12	GT2
MGYG000004850_01731	food_porridge_pulp_adm	2.08476	4.18305e-14	8.43179e-07	malL_2	3.2.1.1; 3.2.1.10; 3.2.1.70	GH13
MGYG000002216_00939	food_porridge_pulp_adm	1.49479	4.1858e-14	8.43513e-07		3.2.1.21	GH3
MGYG000071413_02054	food_gutthi_gripe_adm	0.779176	4.40828e-14	8.70229e-07	glgP	2.4.1.1	GT35
MGYG000116916_00818	food_porridge_pulp_adm	4.5319	4.80799e-14	9.16871e-07		3.2.1.1; 3.2.1.10	GH13
MGYG000064840_03395	food_gutthi_gripe_adm	0.798593	4.81573e-14	9.17758e-07		3.2.1.55	CBM6; GH43
MGYG000006896_02723	food_gutthi_gripe_adm	0.796646	4.99432e-14	9.38066e-07	bglB	3.2.1.21	GH3
MGYG000243187_02260	food_porridge_pulp_adm	1.31614	5.05902e-14	9.45347e-07	susB	3.2.1.20; 3.2.1.3	GH31; GH97
MGYG000108954_02191	food_gutthi_gripe_adm	0.801949	5.08104e-14	9.47818e-07		4.2.2.1	PL8
MGYG000015652_01867	food_porridge_pulp_adm	5.14903	5.091e-14	9.48934e-07		2.4.1.337	GT4
MGYG000029857_00575	food_porridge_pulp_adm	1.69538	5.24427e-14	9.65989e-07	lpxB	2.4.1.182	GT19
MGYG000147857_01350	food_porridge_pulp_adm	1.84578	5.38128e-14	9.81062e-07		3.2.1.78	GH26
MGYG000006623_00128	food_porridge_pulp_adm	2.13191	5.41208e-14	9.84429e-07		3.2.1.1	GH13
MGYG000062516_00682	food_porridge_pulp_adm	2.93519	5.41441e-14	9.84684e-07	malQ	2.4.1.25	GH77
MGYG000263771_00036	food_porridge_pulp_adm	2.47891	5.50095e-14	9.94099e-07		3.2.1.21	GH3
MGYG000245380_01666	food_animal_milk_adm	1.60899	5.57532e-14	1.00214e-06	glgB	2.4.1.18	CBM48; GH13
MGYG000089265_00097	food_animal_milk_adm	1.65073	5.67638e-14	1.013e-06		3.2.1.177	GH31
MGYG000126185_00811	food_porridge_pulp_adm	1.94802	5.71522e-14	1.01715e-06	glgA	2.4.1.21	GT5
MGYG000136716_01641	food_porridge_pulp_adm	2.40329	5.76298e-14	1.02224e-06		3.2.1.4	GH5; GH9
MGYG000196819_01346	food_porridge_pulp_adm	2.54988	5.84472e-14	1.03091e-06		2.4.1.109	GT39
MGYG000004850_01467	food_porridge_pulp_adm	2.47856	5.95965e-14	1.04302e-06	murG	2.4.1.227	GT28
MGYG000119801_00538	food_animal_milk_adm	1.49177	5.98706e-14	1.04589e-06		2.4.1.4; 3.2.1.1; 5.4.99.16	GH13
MGYG000070325_01376	food_porridge_pulp_adm	2.24138	6.06898e-14	1.05444e-06	treC	3.2.1.1; 3.2.1.93	GH13
MGYG000051492_03851	food_gutthi_gripe_adm	0.859124	6.20621e-14	1.06866e-06		2.4.1.268	GT81
MGYG000006353_02853	food_animal_milk_adm	1.37447	6.3546e-14	1.0839e-06	amyA	3.2.1.1	GH57
MGYG000196541_04209	food_gutthi_gripe_adm	0.855714	6.55522e-14	1.10426e-06	rfaJ	2.4.1.58	GT8
MGYG000280962_00008	food_gutthi_gripe_adm	0.758918	6.58081e-14	1.10683e-06	pulA	3.2.1.41	CBM48; GH13
MGYG000002474_02425	food_porridge_pulp_adm	1.34224	6.60888e-14	1.10966e-06	celH	3.2.1.21; 3.2.1.86	GT1
MGYG000004483_01453	food_animal_milk_adm	1.11528	6.74156e-14	1.12294e-06	bglB_4	3.2.1.21	GH3
MGYG000273042_00568	food_porridge_pulp_adm	2.98043	6.83054e-14	1.13178e-06	vpr	3.2.1.4; 3.2.1.8; 3.2.1.81; 3.2.1.82; 3.4.21.96	GH28; GH5; GH9
MGYG000064840_00005	food_gutthi_gripe_adm	0.778653	7.04758e-14	1.15316e-06	mngB	3.2.1.170	GH38
MGYG000218741_02562	food_gutthi_gripe_adm	0.851074	7.0665e-14	1.15501e-06		2.4.1.152; 2.4.1.65	GT10
MGYG000003115_02065	food_gutthi_gripe_adm	0.850624	7.11844e-14	1.16008e-06	bcsA	2.4.1.12	GT2
MGYG000256754_00058	breast_feeding	4.07937	4.45068e-15	1.16879e-06		3.2.1.55	GH51
MGYG000013839_00239	food_porridge_pulp_adm	4.32192	7.31865e-14	1.17947e-06		2.4.1.109	GT39
MGYG000154024_01636	food_gutthi_gripe_adm	1.3383	7.34701e-14	1.18221e-06	nagZ3	3.2.1.52	GH20
MGYG000006624_01255	food_porridge_pulp_adm	5.42524	7.38165e-14	1.18553e-06		2.4.1.11	GT4
MGYG000089477_01658	food_porridge_pulp_adm	1.83229	7.46859e-14	1.19386e-06		3.2.1.20	GH31
MGYG000268210_00093	food_porridge_pulp_adm	4.09167	7.52463e-14	1.1992e-06		3.2.1.97	GH101
MGYG000010155_01097	food_porridge_pulp_adm	5.71122	7.75411e-14	1.22092e-06		3.2.1.4	GH5; GH9
MGYG000272663_03873	food_gutthi_gripe_adm	0.780175	7.76318e-14	1.22177e-06		3.2.1.55	GH51
MGYG000237471_01659	food_gutthi_gripe_adm	0.859326	7.91441e-14	1.23593e-06	malQ	2.4.1.25	GH77
MGYG000097622_01783	food_animal_milk_adm	1.66219	8.02367e-14	1.24609e-06		3.2.1.177	GH31
MGYG000037790_00301	food_porridge_pulp_adm	2.66643	8.2175e-14	1.26397e-06		3.2.1.14	GH18
MGYG000084069_00210	food_porridge_pulp_adm	1.37455	8.26942e-14	1.26873e-06		3.2.1.78	GH26
MGYG000196541_04210	food_gutthi_gripe_adm	0.840129	8.46151e-14	1.28623e-06	waaD	2.4.1.56	GT4; GT9
MGYG000232864_00843	food_porridge_pulp_adm	1.563	9.26625e-14	1.35781e-06	glgB	2.4.1.18	CBM48; GH13
MGYG000230728_00837	breast_feeding	3.30298	5.72597e-15	1.35969e-06	murG	2.4.1.227	GT28
MGYG000132888_00212	food_porridge_pulp_adm	1.81169	9.63419e-14	1.38967e-06	glgP	2.4.1.1	GT35
MGYG000005729_00366	food_porridge_pulp_adm	1.89171	9.7325e-14	1.3981e-06	murG	2.4.1.227	GT28
MGYG000015955_00196	food_porridge_pulp_adm	1.79733	9.77522e-14	1.40175e-06		3.2.1.21	GH3
MGYG000006670_01955	breast_feeding	4.04223	6.17454e-15	1.42241e-06		3.2.1.51	GH95
MGYG000010813_00958	food_animal_milk_adm	0.885984	1.02235e-13	1.43966e-06		3.2.1.52	GH20
MGYG000004174_01735	food_porridge_pulp_adm	2.28865	1.05786e-13	1.4692e-06		3.2.1.21	GH3
MGYG000174340_01020	food_porridge_pulp_adm	1.50692	1.07028e-13	1.47943e-06		3.2.1.24	GH38
MGYG000020389_00483	food_porridge_pulp_adm	1.51548	1.07365e-13	1.4822e-06		3.2.1.18	GH33
MGYG000002403_01339	food_porridge_pulp_adm	1.22612	1.11921e-13	1.51927e-06		3.2.1.40; 3.2.1.55	CBM6; GH43
MGYG000135868_00656	food_porridge_pulp_adm	2.5633	1.1353e-13	1.53221e-06		2.4.1.129; 3.4.16.4	GT51
MGYG000200391_01626	food_porridge_pulp_adm	1.3818	1.15841e-13	1.55066e-06		3.2.1.4	GH5; GH9
MGYG000086075_00094	food_porridge_pulp_adm	1.70976	1.16174e-13	1.55331e-06		3.2.1.37	GH43
MGYG000063634_00475	food_porridge_pulp_adm	3.68934	1.1687e-13	1.55883e-06		3.2.1.86	GT1
MGYG000261796_00715	breast_feeding	4.19011	7.35336e-15	1.57851e-06		3.2.1.156	GH8
MGYG000149931_02783	food_gutthi_gripe_adm	0.729008	1.23396e-13	1.60993e-06	mrcA	2.4.1.129; 3.4.16.4	GT51
MGYG000057774_00898	food_porridge_pulp_adm	2.10837	1.25752e-13	1.6281e-06		3.2.1.18	GH33
MGYG000176578_01159	food_gutthi_gripe_adm	1.41431	1.28102e-13	1.64608e-06		3.2.1.21	GH3
MGYG000137279_00323	food_gutthi_gripe_adm	0.752972	1.35851e-13	1.70441e-06		3.2.1.78	GH26
MGYG000000176_02641	food_gutthi_gripe_adm	0.745242	1.38965e-13	1.72745e-06		2.4.1.230; 2.4.1.282	GH65
MGYG000044747_01925	food_gutthi_gripe_adm	0.72285	1.41259e-13	1.74429e-06	scrB	3.2.1.26	GH32
MGYG000287574_02532	food_porridge_pulp_adm	2.07145	1.44401e-13	1.76716e-06		2.4.1.337	GT4
MGYG000122843_03386	food_animal_milk_adm	2.19238	1.45202e-13	1.77296e-06		3.2.1.51	GH29
MGYG000251547_00205	food_porridge_pulp_adm	2.07413	1.45808e-13	1.77734e-06	pstP	2.4.1.18; 3.1.3.16	CBM48; GH13
MGYG000049875_01270	breast_feeding	4.55124	9.4891e-15	1.83603e-06		3.2.1.20	GH31
MGYG000048422_04073	food_animal_milk_adm	2.57559	1.54191e-13	1.83712e-06	otsB	2.4.1.15; 3.1.3.12	GT20
MGYG000122140_00299	food_animal_milk_adm	1.76539	1.64858e-13	1.91125e-06		3.2.1.177	GH31
MGYG000001739_00279	food_porridge_pulp_adm	5.11713	1.66848e-13	1.92485e-06	amyS	3.2.1.1	GH13
MGYG000070969_00025	food_animal_milk_adm	1.2341	1.76369e-13	1.989e-06		3.2.1.24	GH38
MGYG000167695_00220	food_porridge_pulp_adm	4.37474	1.80747e-13	2.018e-06		3.2.1.4	GH5; GH9
MGYG000234725_00716	food_porridge_pulp_adm	2.42256	1.81972e-13	2.02607e-06	glgA	2.4.1.21	GT5
MGYG000185240_02578	food_animal_milk_adm	1.82367	1.85089e-13	2.04648e-06	murG	2.4.1.227	GT28
MGYG000155504_01864	food_animal_milk_adm	1.16463	1.86652e-13	2.05666e-06	malL	3.2.1.20	GH31
MGYG000074345_01984	food_porridge_pulp_adm	4.98657	1.8802e-13	2.06554e-06	glgA	2.4.1.21	GT5
MGYG000004382_01450	food_porridge_pulp_adm	3.09528	1.94753e-13	2.10885e-06		3.2.1.1; 3.2.1.10; 3.2.1.20; 3.2.1.70	GH13; GH31
MGYG000146217_01606	food_porridge_pulp_adm	2.0024	2.0063e-13	2.14614e-06		3.2.1.78	GH26
MGYG000004248_01045	food_porridge_pulp_adm	2.10819	2.00758e-13	2.14695e-06	treA	3.2.1.28	GH37
MGYG000112463_01107	food_animal_milk_adm	1.73097	2.08021e-13	2.19239e-06		3.2.1.177	GH31
MGYG000004432_00365	food_porridge_pulp_adm	1.1884	2.1765e-13	2.25161e-06		3.2.1.51	GH95
MGYG000001922_00413	food_porridge_pulp_adm	1.59724	2.25621e-13	2.29978e-06		2.4.1.337	GT4
MGYG000111506_00580	food_porridge_pulp_adm	2.5854	2.27063e-13	2.30842e-06		2.4.1.52	GT4
MGYG000164837_01329	food_porridge_pulp_adm	1.81463	2.33353e-13	2.34583e-06	pic	2.4.99.16; 3.2.1.14; 3.4.21.72	GH13; GH18
MGYG000020942_02038	food_porridge_pulp_adm	3.55495	2.404e-13	2.38724e-06		3.2.1.4	GH5; GH9
MGYG000283922_01943	food_gutthi_gripe_adm	0.803013	2.46747e-13	2.42409e-06	glgP	2.4.1.1; 2.4.1.11	GT3; GT35
MGYG000002406_02620	food_sugar_water_adm	0.524431	2.49642e-13	2.44077e-06	otsA	2.4.1.15; 2.4.1.347; 3.1.3.12	GT20
MGYG000272475_01521	food_gutthi_gripe_adm	2.45628	2.5097e-13	2.44839e-06		3.2.1.52	GH20
MGYG000050126_01684	food_porridge_pulp_adm	1.81309	2.60109e-13	2.50038e-06		3.2.1.20	GH31
MGYG000128656_00582	food_gutthi_gripe_adm	1.39567	2.65663e-13	2.5316e-06	bglB_4	3.2.1.21	GH3
MGYG000001518_01008	food_animal_milk_adm	0.891839	2.77856e-13	2.59917e-06		3.2.1.21	GH3
MGYG000178954_01335	food_porridge_pulp_adm	2.08379	2.80393e-13	2.61307e-06		3.2.1.21	GH3
MGYG000007868_00836	food_porridge_pulp_adm	2.73122	2.9215e-13	2.67679e-06		3.2.1.78	GH26
MGYG000179302_01532	food_porridge_pulp_adm	1.61199	3.09229e-13	2.76743e-06	pulA	3.2.1.41	CBM48; GH13
MGYG000072705_00808	food_animal_milk_adm	2.42795	3.11818e-13	2.78098e-06		3.2.1.21	GH3
MGYG000086992_00476	food_porridge_pulp_adm	2.2395	3.24851e-13	2.84848e-06	nagH	3.2.1.52	GH20
MGYG000200608_02843	food_porridge_pulp_adm	5.13658	3.37575e-13	2.91327e-06	tagA	2.4.1.187	GT26
MGYG000022089_01257	food_porridge_pulp_adm	3.71836	3.49467e-13	2.97289e-06	envE	3.1.4.46; 3.2.1.18; 3.2.1.8	GH33
MGYG000017647_00047	breast_feeding	3.61319	2.16879e-14	2.97641e-06	glgP	2.4.1.1	GT35
MGYG000098560_00707	food_porridge_pulp_adm	5.21495	3.51273e-13	2.98186e-06	glgP	2.4.1.1	GT35
MGYG000272788_01324	food_porridge_pulp_adm	1.97407	3.5526e-13	3.00161e-06		3.2.1.177	GH31
MGYG000003871_00708	food_gutthi_gripe_adm	0.702663	3.57959e-13	3.01492e-06		3.2.1.45	GH30
MGYG000097104_00574	food_animal_milk_adm	1.05654	3.60652e-13	3.02816e-06		2.4.1.25	GH77
MGYG000100150_00958	breast_feeding	4.77761	2.28448e-14	3.06714e-06	glgE	2.4.99.16	GH13
MGYG000005759_02218	food_animal_milk_adm	2.4228	3.88658e-13	3.16344e-06		3.2.1.51	GH95
MGYG000002828_00681	food_porridge_pulp_adm	1.29733	3.91467e-13	3.17677e-06	bglB	3.2.1.21	GH3
MGYG000287211_02046	food_gutthi_gripe_adm	0.702724	4.20247e-13	3.31108e-06	surA	2.4.1.129; 3.4.16.4	GT51
MGYG000126832_01388	food_porridge_pulp_adm	3.3181	4.2304e-13	3.32391e-06		3.2.1.21	GH3
MGYG000043054_03882	food_porridge_pulp_adm	1.55259	4.33152e-13	3.37002e-06	bglB	3.2.1.21	GH3
MGYG000003804_00928	food_animal_milk_adm	1.26988	4.35889e-13	3.38242e-06		2.4.1.291	GT4
MGYG000074078_01371	food_gutthi_gripe_adm	0.700005	4.48431e-13	3.43883e-06	pic	2.4.99.16; 3.2.1.14; 3.4.21.72	GH13; GH18
MGYG000039913_00548	food_porridge_pulp_adm	1.71965	4.50363e-13	3.44746e-06	spr	3.4.17.13	CBM50
MGYG000056702_00449	food_porridge_pulp_adm	2.01271	4.52991e-13	3.45917e-06		3.2.1.1	GH13
MGYG000034852_00035	food_porridge_pulp_adm	2.22771	4.65709e-13	3.51543e-06		2.4.1.315	GT28
MGYG000272788_00940	food_porridge_pulp_adm	2.30928	4.94411e-13	3.64002e-06		2.4.1.279; 2.4.1.332	GH65
MGYG000032141_00976	food_gutthi_gripe_adm	0.695219	5.03187e-13	3.67749e-06		2.4.1.18	GH57
MGYG000084659_01694	food_gutthi_gripe_adm	0.686516	5.25813e-13	3.77281e-06		3.2.1.11	GH66
MGYG000231141_00943	food_porridge_pulp_adm	1.79523	5.26399e-13	3.77525e-06		3.2.1.172	GH105
MGYG000038116_01549	food_porridge_pulp_adm	5.22098	5.29946e-13	3.79003e-06	malP_1	2.4.1.1	GT35
MGYG000220541_01478	food_porridge_pulp_adm	4.1103	5.4184e-13	3.83926e-06	yesX	3.2.1.11; 3.2.1.18; 3.2.1.35; 3.2.1.51; 4.2.2.23; 4.2.2.24	GH29; GH33; GH66; PL11
MGYG000162795_01205	food_tea_adm	0.929111	5.683e-13	3.94713e-06		2.4.1.129; 3.4.16.4	GT51
MGYG000004889_01062	food_porridge_pulp_adm	1.50026	5.81344e-13	3.99951e-06		3.2.1.24	GH38
MGYG000207094_00854	food_porridge_pulp_adm	1.87236	5.81657e-13	4.00076e-06	kdtA	2.4.99.12; 2.4.99.13; 2.4.99.14; 2.4.99.15	GT30
MGYG000272109_00435	food_animal_milk_adm	1.76145	5.82102e-13	4.00253e-06		3.2.1.52	GH20
MGYG000001592_02524	food_gutthi_gripe_adm	0.681188	5.98911e-13	4.06925e-06		3.2.1.21	GH3
MGYG000122406_00879	food_animal_milk_adm	1.21775	6.02269e-13	4.08248e-06		4.2.2.23	PL11
MGYG000263093_01119	food_formula_powder_milk_adm	0.704682	6.04345e-13	4.09064e-06		3.2.1.1; 3.2.1.41	CBM48; GH13
MGYG000013203_01658	food_porridge_pulp_adm	5.56792	6.24003e-13	4.16734e-06		2.4.1.20	GT36
MGYG000034235_00827	food_animal_milk_adm	2.61714	6.41262e-13	4.23382e-06		3.2.1.37	GH43
MGYG000012751_01270	food_porridge_pulp_adm	2.30328	6.45228e-13	4.24899e-06		3.2.1.21	GH1
MGYG000001706_00417	food_formula_powder_milk_adm	0.927468	6.54989e-13	4.28615e-06	pglB	2.4.99.18; 2.4.99.19	GT66
MGYG000002707_00284	food_porridge_pulp_adm	1.55662	6.63399e-13	4.31797e-06	apu	2.4.1.25	GH77
MGYG000109502_00539	food_animal_milk_adm	1.06277	6.68149e-13	4.33586e-06	glgP	2.4.1.1	GT35
MGYG000098155_01195	food_porridge_pulp_adm	3.42903	6.85931e-13	4.40237e-06		3.2.1.4	GH5; GH9
MGYG000058006_00872	food_porridge_pulp_adm	0.712729	6.86435e-13	4.40425e-06	wcoB	3.2.1.1; 3.2.1.4	GH13; GH5; GH9
MGYG000012153_01802	food_porridge_pulp_adm	2.83104	6.91694e-13	4.42376e-06		3.2.1.86	GT1
MGYG000102764_01454	food_porridge_pulp_adm	4.11357	7.06826e-13	4.47957e-06	ompC	2.4.1.10; 3.5.1.28	GH68
MGYG000148017_00472	food_gutthi_gripe_adm	0.67402	7.15393e-13	4.51094e-06		2.4.1.4; 3.2.1.1; 5.4.99.16	GH13
MGYG000059986_01895	food_formula_powder_milk_adm	1.10675	7.53446e-13	4.64832e-06		3.2.1.78	GH26
MGYG000069314_00448	food_animal_milk_adm	2.36659	7.59331e-13	4.6693e-06		3.2.1.51	GH29
MGYG000004439_00903	food_porridge_pulp_adm	1.88017	8.37763e-13	4.94238e-06	celM	3.2.1.4	GH5; GH9
MGYG000068043_00194	food_porridge_pulp_adm	1.63848	8.4599e-13	4.97037e-06	murG	2.4.1.227	GT28
MGYG000026915_01476	breast_feeding	4.69739	5.36506e-14	4.99473e-06		3.2.1.86	GT1
MGYG000004651_02021	food_gutthi_gripe_adm	1.59922	8.69308e-13	5.04905e-06		3.1.3.5; 3.1.3.6; 3.1.4.16; 3.6.1.45	CBM50
MGYG000192483_01369	food_porridge_pulp_adm	1.58658	8.83144e-13	5.0953e-06	malQ	2.4.1.25	GH77
MGYG000135056_01259	food_animal_milk_adm	1.26609	9.18631e-13	5.2125e-06		2.4.1.20	GT36
MGYG000052510_00364	food_porridge_pulp_adm	3.22185	9.20617e-13	5.219e-06	glgP	2.4.1.1	GT35
MGYG000272531_00330	food_porridge_pulp_adm	1.76579	9.25397e-13	5.23462e-06		3.2.1.4	GH5; GH9
MGYG000146520_00481	food_porridge_pulp_adm	2.31638	9.48714e-13	5.31031e-06		2.4.1.129; 3.4.16.4	GT51
MGYG000048185_01610	food_porridge_pulp_adm	1.83154	9.69222e-13	5.37622e-06	pulA	3.2.1.41	CBM48; GH13
MGYG000005126_01674	food_animal_milk_adm	0.843415	9.81513e-13	5.41543e-06		3.2.1.21	GH3
MGYG000226020_01752	food_gutthi_gripe_adm	0.642769	1.00044e-12	5.47539e-06		3.2.1.52	GH20
MGYG000081933_01532	food_porridge_pulp_adm	1.74386	1.01395e-12	5.51786e-06	lacZ	3.2.1.23; 3.2.1.52	GH20
MGYG000001761_00704	food_porridge_pulp_adm	1.73205	1.01958e-12	5.53552e-06	treC	3.2.1.1; 3.2.1.93	GH13
MGYG000201867_01630	food_porridge_pulp_adm	4.82627	1.02607e-12	5.55578e-06		3.2.1.68	CBM48; GH13
MGYG000257971_01799	food_animal_milk_adm	0.974664	1.05249e-12	5.63776e-06	glgB	2.4.1.18	CBM48; GH13
MGYG000004439_01096	food_porridge_pulp_adm	1.9855	1.05414e-12	5.64286e-06	tarA	2.4.1.187	GT26
MGYG000130883_01283	food_porridge_pulp_adm	4.66029	1.09048e-12	5.75404e-06	surA	2.4.1.129; 3.4.16.4	GT51
MGYG000003115_01723	food_gutthi_gripe_adm	0.707921	1.09297e-12	5.7616e-06	treY	5.4.99.15	GH13
MGYG000021814_02688	food_porridge_pulp_adm	1.92511	1.12382e-12	5.85466e-06	glgP	2.4.1.1; 2.4.1.11	GT3; GT35
MGYG000089205_01396	food_porridge_pulp_adm	1.66206	1.13081e-12	5.87558e-06	lpxB	2.4.1.182	GT19
MGYG000072344_00616	food_animal_milk_adm	4.15314	1.1427e-12	5.91105e-06		3.2.1.21	GH3
MGYG000001185_00949	food_porridge_pulp_adm	1.99035	1.14559e-12	5.91965e-06		2.4.1.315	GT28
MGYG000000908_00192	food_porridge_pulp_adm	5.34294	1.148e-12	5.9268e-06		3.2.1.86	GT1
MGYG000272788_00075	food_porridge_pulp_adm	1.84321	1.15354e-12	5.94326e-06		3.2.1.55	GH51
MGYG000001750_00789	food_gutthi_gripe_adm	0.637473	1.15493e-12	5.94737e-06	mrcA	2.4.1.129; 3.4.16.4	GT51
MGYG000099683_00082	food_gutthi_gripe_adm	0.703997	1.19373e-12	6.06146e-06		3.2.1.51	GH29
MGYG000199173_03777	food_animal_milk_adm	0.97832	1.19431e-12	6.06317e-06	ndvB	2.4.1.321	GH94; GT84
MGYG000148929_02025	food_gutthi_gripe_adm	0.636004	1.20227e-12	6.08637e-06	glgP	2.4.1.1	GT35
MGYG000087183_00933	food_gutthi_gripe_adm	1.44393	1.20708e-12	6.10036e-06		3.2.1.172	GH105
MGYG000257011_00121	food_gutthi_gripe_adm	0.635236	1.22785e-12	6.16047e-06	mrcA	2.4.1.129; 3.4.16.4	GT51
MGYG000005822_00854	food_porridge_pulp_adm	2.09079	1.24185e-12	6.20073e-06	pstP	2.4.1.18; 3.1.3.16	CBM48; GH13
MGYG000250517_00551	food_porridge_pulp_adm	1.45644	1.25914e-12	6.2502e-06	glgA	2.4.1.21	GT5
MGYG000135852_00808	food_porridge_pulp_adm	4.24067	1.30051e-12	6.36733e-06	murG	2.4.1.227	GT28
MGYG000105651_01475	food_animal_milk_adm	0.832394	1.30843e-12	6.38958e-06		3.2.1.1	GH13
MGYG000164285_01021	food_gutthi_gripe_adm	0.691113	1.31581e-12	6.41023e-06	murG	2.4.1.227	GT28
MGYG000077997_01085	food_animal_milk_adm	1.14733	1.34351e-12	6.48738e-06		3.1.3.5; 3.1.3.6; 3.1.4.16; 3.2.1.51; 3.6.1.45	GH29
MGYG000115810_03740	food_animal_milk_adm	1.15531	1.39065e-12	6.61703e-06	fghA	3.1.2.12	CE1
MGYG000042101_02158	food_porridge_pulp_adm	2.25491	1.39243e-12	6.62191e-06		3.2.1.133; 3.2.1.135; 3.2.1.54; 3.5.4.33	GH13
MGYG000176519_01859	food_animal_milk_adm	1.41277	1.39771e-12	6.6363e-06		3.2.1.20	GH31
MGYG000221742_00103	food_porridge_pulp_adm	1.67951	1.41591e-12	6.68573e-06	CP_0954	4.2.2.1	PL8
MGYG000003792_01118	food_gutthi_gripe_adm	0.62979	1.42725e-12	6.71638e-06	glgP	2.4.1.1	GT35
MGYG000002165_01838	food_gutthi_gripe_adm	0.653187	1.46471e-12	6.81692e-06	pbpG	2.4.1.129; 3.4.16.4	GT51
MGYG000062796_02537	food_porridge_pulp_adm	1.74627	1.47126e-12	6.83438e-06		2.4.1.348	GT4
MGYG000032400_02119	food_gutthi_gripe_adm	0.644755	1.52667e-12	6.98072e-06	glgP	2.4.1.1	GT35
MGYG000275961_00024	food_porridge_pulp_adm	2.24719	1.53413e-12	7.00025e-06		3.2.1.51	GH29
MGYG000126463_00474	food_gutthi_gripe_adm	1.36093	1.54247e-12	7.02202e-06		3.2.1.52	GH20
MGYG000195995_00264	food_porridge_pulp_adm	2.29176	1.56709e-12	7.086e-06		3.2.1.78	GH26
MGYG000181375_02218	food_animal_milk_adm	1.22556	1.56744e-12	7.08691e-06	pulA	3.2.1.41	CBM48; GH13
MGYG000006670_01956	breast_feeding	3.70108	1.00207e-13	7.08868e-06		3.2.1.51	GH29
MGYG000041421_03358	food_gutthi_gripe_adm	1.48117	1.57104e-12	7.09622e-06	xyl3A_3	3.2.1.21	GH3
MGYG000004439_01720	food_porridge_pulp_adm	2.04697	1.69673e-12	7.41587e-06		3.2.1.199	GH31
MGYG000002408_00406	food_gutthi_gripe_adm	0.68791	1.72811e-12	7.49402e-06		3.2.1.10; 3.2.1.20	GH13; GH31
MGYG000051958_00083	food_porridge_pulp_adm	1.61475	1.77046e-12	7.59851e-06	lpxB	2.4.1.182	GT19
MGYG000110759_04423	food_porridge_pulp_adm	8.13357	1.77783e-12	7.61658e-06		3.2.1.55	GH51
MGYG000227273_02567	food_animal_milk_adm	1.66775	1.78751e-12	7.64025e-06		3.2.1.172	GH105
MGYG000056913_01199	food_porridge_pulp_adm	3.39809	1.81181e-12	7.69946e-06		2.4.1.288	GT2
MGYG000025983_00831	food_gutthi_gripe_adm	0.644973	1.82729e-12	7.73699e-06	cscA	3.2.1.26	GH32
MGYG000010930_00595	food_porridge_pulp_adm	1.91558	1.87606e-12	7.85433e-06	cbpD	3.2.1.8; 3.2.1.96; 3.4.17.14; 3.5.1.28; 3.5.1.78; 6.3.1.8	CBM50
MGYG000004555_00085	food_animal_milk_adm	0.854703	1.89004e-12	7.8877e-06		3.2.1.41	CBM48; GH13
MGYG000254717_00852	food_porridge_pulp_adm	1.42273	1.93187e-12	7.98694e-06		4.2.2.1	PL8
MGYG000088362_00291	food_porridge_pulp_adm	3.61642	1.96588e-12	8.06693e-06		3.2.1.68	CBM48; GH13
MGYG000243232_00212	breast_feeding	3.0982	1.27843e-13	8.11314e-06	malQ	2.4.1.25	GH77
MGYG000007010_02335	food_animal_milk_adm	1.29386	2.09371e-12	8.36223e-06		3.2.1.24	GH38
MGYG000149306_00335	food_animal_milk_adm	1.82511	2.09879e-12	8.3738e-06		3.2.1.24	GH38
MGYG000200105_02101	food_animal_milk_adm	0.948667	2.26648e-12	8.74891e-06		3.2.1.20	GH31
MGYG000105845_00686	food_gutthi_gripe_adm	0.66849	2.27937e-12	8.77724e-06	lpxB	2.4.1.182	GT19
MGYG000009096_01669	food_animal_milk_adm	1.75512	2.31122e-12	8.84689e-06	glgX	3.2.1.68	CBM48; GH13
MGYG000244739_01213	food_animal_milk_adm	3.44409	2.33095e-12	8.88983e-06		2.4.1.5	GH13
MGYG000183403_00705	food_porridge_pulp_adm	2.6433	2.34828e-12	8.92742e-06		3.2.1.176; 3.2.1.4	GH48; GH5; GH9
MGYG000059911_00002	food_gutthi_gripe_adm	1.47312	2.36534e-12	8.96429e-06	amyA2	3.2.1.135	GH13
MGYG000004566_00305	food_formula_powder_milk_adm	0.676288	2.37614e-12	8.98758e-06		3.2.1.18	GH33
MGYG000188836_01934	food_porridge_pulp_adm	1.67539	2.39438e-12	9.0268e-06		3.2.1.78	GH26
MGYG000243068_01177	food_animal_milk_adm	1.00792	2.42888e-12	9.10061e-06		3.2.1.133; 3.2.1.135; 3.2.1.54; 3.5.4.33	GH13
MGYG000017222_00581	food_porridge_pulp_adm	5.58534	2.44469e-12	9.13429e-06		3.2.1.51	GH29
MGYG000002439_01376	food_porridge_pulp_adm	1.50028	2.46312e-12	9.17341e-06	treC	3.2.1.1; 3.2.1.10; 3.2.1.93	GH13
MGYG000073872_01888	food_gutthi_gripe_adm	1.45759	2.48267e-12	9.21478e-06	lsgF	2.4.1.303	GT2
MGYG000141252_01515	food_animal_milk_adm	1.2671	2.65183e-12	9.56683e-06	murG	2.4.1.227	GT28
MGYG000044697_00854	food_porridge_pulp_adm	4.66126	2.66048e-12	9.58454e-06	glgA	2.4.1.21	GT5
MGYG000037031_00170	food_porridge_pulp_adm	2.4023	2.68355e-12	9.6317e-06		3.2.1.18	GH33
MGYG000003202_00501	food_gutthi_gripe_adm	0.629495	2.80461e-12	9.87626e-06		3.2.1.51	GH29
MGYG000061381_00115	food_porridge_pulp_adm	3.35133	2.82751e-12	9.92198e-06	ams	2.4.1.4; 3.2.1.1; 5.4.99.16	GH13
MGYG000003651_01565	food_gutthi_gripe_adm	0.666989	2.85483e-12	9.97632e-06	waaA	2.4.99.12; 2.4.99.13; 2.4.99.14; 2.4.99.15	GT30
MGYG000120186_01213	food_porridge_pulp_adm	2.18634	2.99871e-12	1.02587e-05		3.2.1.37; 3.2.1.55	GH43; GH51
MGYG000244843_01215	food_animal_milk_adm	0.921564	3.01684e-12	1.02939e-05		3.1.3.5; 3.1.3.6; 3.1.4.16; 3.2.1.51; 3.6.1.45	GH29
MGYG000155731_01134	food_gutthi_gripe_adm	0.619279	3.08802e-12	1.0431e-05		3.1.3.5; 3.1.3.6; 3.1.4.16; 3.2.1.51; 3.6.1.45	GH29
MGYG000002765_00834	food_porridge_pulp_adm	2.59755	3.10715e-12	1.04676e-05		3.2.1.21; 3.4.11.1; 3.6.3.34	GH3
MGYG000148597_00350	food_porridge_pulp_adm	4.30782	3.12704e-12	1.05056e-05		3.2.1.4	GH5; GH9
MGYG000205851_01261	food_porridge_pulp_adm	2.32252	3.15799e-12	1.05644e-05	bglB	3.2.1.21	GH3
MGYG000163045_00594	breast_feeding	3.5503	2.09341e-13	1.0636e-05		3.2.1.1; 3.2.1.41	CBM48; GH13
MGYG000159414_00067	food_animal_milk_adm	1.0094	3.20677e-12	1.06566e-05	bglX	3.2.1.21	GH3
MGYG000004850_01422	food_porridge_pulp_adm	2.10923	3.49357e-12	1.11867e-05		2.4.1.315	GT28
MGYG000154145_01322	food_gutthi_gripe_adm	2.76628	3.53817e-12	1.12673e-05		3.2.1.1	GH13
MGYG000001307_01217	food_gutthi_gripe_adm	0.657242	3.6373e-12	1.1445e-05	glgA	2.4.1.21	GT5
MGYG000145989_01617	food_porridge_pulp_adm	1.93006	3.65977e-12	1.14849e-05		2.4.1.52	GT4
MGYG000217612_00918	food_animal_milk_adm	1.05251	3.6792e-12	1.15194e-05		3.2.1.55	GH51
MGYG000000923_00848	food_animal_milk_adm	0.961423	3.72686e-12	1.16036e-05		3.2.1.20; 3.2.1.3	GH31; GH97
MGYG000216941_00337	food_porridge_pulp_adm	1.89949	3.75159e-12	1.16471e-05	surA	2.4.1.129; 3.4.16.4	GT51
MGYG000158855_02998	food_gutthi_gripe_adm	0.617683	3.93007e-12	1.19573e-05	bglH5	3.2.1.86	GT1
MGYG000256423_00913	food_animal_milk_adm	1.1397	3.93634e-12	1.19681e-05		3.2.1.4	GH5; GH9
MGYG000029945_01027	food_porridge_pulp_adm	2.98525	4.13521e-12	1.23061e-05	glgP	2.4.1.1	GT35
MGYG000177401_00705	food_porridge_pulp_adm	2.11961	4.15364e-12	1.23371e-05	sacA	3.2.1.26	GH32
MGYG000284043_01208	food_gutthi_gripe_adm	0.608894	4.16713e-12	1.23597e-05	glgP	2.4.1.1	GT35
MGYG000075792_00723	food_porridge_pulp_adm	1.5962	4.1996e-12	1.2414e-05		3.2.1.18	GH33
MGYG000003804_01202	food_animal_milk_adm	1.45313	4.27616e-12	1.25413e-05	bglB_4	3.2.1.21	GH3
MGYG000156434_01146	food_sugar_water_adm	0.661161	4.2966e-12	1.25751e-05		2.4.1.291	GT4
MGYG000202064_00959	food_gutthi_gripe_adm	0.591936	4.30375e-12	1.25869e-05		3.2.1.51	GH95
MGYG000058679_01210	food_animal_milk_adm	1.39933	4.31159e-12	1.25999e-05		3.2.1.24	GH38
MGYG000285316_00389	food_porridge_pulp_adm	4.68204	4.31593e-12	1.26071e-05		3.2.1.4	GH5; GH9
MGYG000029067_00088	food_porridge_pulp_adm	1.37553	4.47804e-12	1.28722e-05		3.2.1.21	GH3
MGYG000009339_01761	food_porridge_pulp_adm	3.06501	4.53165e-12	1.29589e-05		2.4.1.348	GT4
MGYG000221807_01063	food_animal_milk_adm	2.19214	4.7467e-12	1.33023e-05	bglA1	3.2.1.86	GT1
MGYG000279846_01792	breast_feeding	4.9534	3.18636e-13	1.33594e-05	glgA	2.4.1.342	GT4
MGYG000046687_01113	food_animal_milk_adm	1.08542	4.93784e-12	1.36016e-05	murG	2.4.1.227	GT28
MGYG000178118_00025	food_porridge_pulp_adm	2.62223	4.94577e-12	1.36139e-05		3.2.1.4; 3.2.1.52	GH5; GH9
MGYG000163801_01175	food_gutthi_gripe_adm	0.608828	5.0923e-12	1.38397e-05	amyA2	3.2.1.1	GH13
MGYG000013369_00947	food_animal_milk_adm	1.51132	5.29139e-12	1.41419e-05		3.2.1.156	GH8
MGYG000140377_00452	food_gutthi_gripe_adm	0.641961	5.37687e-12	1.427e-05		3.2.1.52	GH20
MGYG000273953_01763	food_animal_milk_adm	1.10379	5.37854e-12	1.42725e-05	CP_0954	4.2.2.1	PL8
MGYG000012434_00290	breast_feeding	3.6333	3.63382e-13	1.43398e-05	glgX	3.2.1.196; 3.2.1.68	CBM48; GH13
MGYG000058832_00793	food_gutthi_gripe_adm	0.605901	5.55399e-12	1.45327e-05		2.7.7.6	GH23
MGYG000001461_01625	food_gutthi_gripe_adm	0.640172	5.63385e-12	1.46499e-05		3.2.1.51	GH95
MGYG000003382_01977	food_animal_milk_adm	1.17829	5.73766e-12	1.48011e-05	treY	5.4.99.15	GH13
MGYG000231751_00066	food_gutthi_gripe_adm	0.60434	5.81857e-12	1.49181e-05	mrcA	2.4.1.129; 3.4.16.4	GT51
MGYG000004185_02038	food_gutthi_gripe_adm	0.596758	5.97154e-12	1.51373e-05	xylB	3.2.1.37; 3.2.1.55	GH43; GH51
MGYG000131431_01744	food_animal_milk_adm	2.69796	6.03522e-12	1.52278e-05	mtgA	2.4.1.129	GT51
MGYG000269806_00684	food_animal_milk_adm	1.35831	6.11067e-12	1.53344e-05	tagA	2.4.1.187	GT26
MGYG000152767_01148	food_gutthi_gripe_adm	0.646199	6.39035e-12	1.57248e-05	bglB	3.2.1.21	GH3
MGYG000018960_00325	food_porridge_pulp_adm	2.53423	6.43021e-12	1.57798e-05		3.2.1.4	GH5; GH9
MGYG000027181_00033	food_porridge_pulp_adm	1.83531	6.49972e-12	1.58753e-05	iolC	2.7.1.4; 2.7.1.92; 3.2.1.26	GH32
MGYG000023542_00902	food_porridge_pulp_adm	1.60126	6.57092e-12	1.59727e-05		3.1.3.5; 3.1.3.6; 3.1.4.16; 3.2.1.51; 3.6.1.45	GH29
MGYG000090712_00648	food_gutthi_gripe_adm	0.649042	6.80809e-12	1.62936e-05		2.4.1.129; 3.4.16.4	GT51
MGYG000063783_00777	breast_feeding	4.04017	4.64045e-13	1.63493e-05		3.2.1.51	GH29
MGYG000100423_01180	food_porridge_pulp_adm	1.87095	6.97011e-12	1.651e-05		3.2.1.1	GH13
MGYG000108617_01228	food_porridge_pulp_adm	3.46809	6.97429e-12	1.65155e-05		3.2.1.4	GH5; GH9
MGYG000085027_04553	food_gutthi_gripe_adm	1.19596	7.00598e-12	1.65576e-05	gtf1	2.4.1.52	GT4
MGYG000003215_00829	food_porridge_pulp_adm	4.90599	7.59282e-12	1.73211e-05		2.4.1.315	GT28
MGYG000002209_02646	food_sugar_water_adm	0.473608	7.59906e-12	1.7329e-05	abf2	3.2.1.55	GH51
MGYG000255704_09092	food_animal_milk_adm	1.38264	7.80398e-12	1.75892e-05		3.2.1.14	GH18
MGYG000202331_00370	food_animal_milk_adm	4.06529	7.86419e-12	1.7665e-05		3.2.1.55	GH51
MGYG000000950_00747	food_porridge_pulp_adm	3.80695	8.17717e-12	1.80551e-05	murG	2.4.1.227	GT28
MGYG000114199_00715	food_porridge_pulp_adm	2.53195	8.22907e-12	1.81191e-05		3.2.1.52	GH20
MGYG000003462_01155	food_gutthi_gripe_adm	0.641584	8.24464e-12	1.81383e-05	glgA	2.4.1.21	GT5
MGYG000004495_01589	food_gutthi_gripe_adm	0.591812	8.5049e-12	1.84563e-05	bglB	3.2.1.21	GH3
MGYG000002334_00368	food_gutthi_gripe_adm	0.591497	8.58756e-12	1.85564e-05		3.2.1.97	GH101
MGYG000000098_02772	food_porridge_pulp_adm	2.40526	8.79599e-12	1.88069e-05		2.4.1.187	GT26
MGYG000005715_01050	food_porridge_pulp_adm	1.83455	9.01047e-12	1.90617e-05		3.1.3.5; 3.1.3.6; 3.1.4.16; 3.2.1.51; 3.6.1.45	GH29
MGYG000068865_00529	food_porridge_pulp_adm	4.90518	9.22172e-12	1.93101e-05		3.2.1.51	GH29
MGYG000017936_01720	food_porridge_pulp_adm	3.09068	9.28418e-12	1.93831e-05		3.2.1.18	GH33
MGYG000008950_00176	food_porridge_pulp_adm	2.27502	9.31741e-12	1.94218e-05		3.1.1.53; 3.2.1.4	GH5; GH9
MGYG000078603_00982	food_porridge_pulp_adm	1.34359	9.36276e-12	1.94745e-05	bclA	2.7.7.7; 3.2.1.4; 5.4.99.22	GH5; GH9
MGYG000018052_00090	food_gutthi_gripe_adm	0.631268	9.46257e-12	1.95902e-05	glgA	2.4.1.21	GT5
MGYG000006896_02924	food_gutthi_gripe_adm	0.581715	9.46502e-12	1.9593e-05		3.2.1.55	CBM6; GH43
MGYG000054855_01950	food_animal_milk_adm	2.11266	9.55111e-12	1.96923e-05		2.4.1.187	GT26
MGYG000017138_01331	food_porridge_pulp_adm	4.52719	9.5637e-12	1.97068e-05		3.2.1.4	GH5; GH9
MGYG000040481_00030	food_porridge_pulp_adm	2.50498	9.73371e-12	1.99015e-05		3.2.1.11	GH66
MGYG000116564_01218	food_animal_milk_adm	1.07439	1.00295e-11	2.02368e-05	glgA	2.4.1.21	GT5
MGYG000128422_01738	food_porridge_pulp_adm	5.61183	1.0144e-11	2.03653e-05		2.4.1.291	GT4
MGYG000212259_01192	breast_feeding	3.72569	7.0933e-13	2.04885e-05		3.2.1.45	GH30
MGYG000157714_00093	food_porridge_pulp_adm	2.44465	1.03451e-11	2.05895e-05	glgX	3.2.1.68	CBM48; GH13
MGYG000173689_00861	breast_feeding	3.79709	7.23614e-13	2.07056e-05		3.2.1.1; 3.2.1.41	CBM48; GH13
MGYG000222990_02228	food_animal_milk_adm	2.05544	1.06794e-11	2.09578e-05	lacZ	3.2.1.23; 3.2.1.52	GH20
MGYG000005300_00224	food_animal_milk_adm	1.93651	1.08477e-11	2.11412e-05	lpxK	2.4.99.12; 2.4.99.13; 2.4.99.14; 2.4.99.15	GT30
MGYG000107489_00722	food_porridge_pulp_adm	4.52216	1.09324e-11	2.12331e-05	glgX	3.2.1.68	CBM48; GH13
MGYG000115810_03915	food_animal_milk_adm	1.22187	1.09336e-11	2.12343e-05	MA20_30090	2.4.1.83	GT2
MGYG000286153_01083	food_porridge_pulp_adm	3.07074	1.09933e-11	2.12989e-05		3.2.1.24	GH38
MGYG000056155_01306	breast_feeding	3.76715	7.63884e-13	2.13067e-05	bglX	3.2.1.21	GH3
MGYG000029166_01420	breast_feeding	4.59656	7.69133e-13	2.13839e-05		3.2.1.24	GH38
MGYG000182872_03238	food_gutthi_gripe_adm	0.576485	1.11523e-11	2.14699e-05	bglB	3.2.1.21	GH3
MGYG000006727_01753	food_porridge_pulp_adm	4.73342	1.13744e-11	2.1707e-05	bglA	3.2.1.86	GT1
MGYG000165962_00456	food_gutthi_gripe_adm	1.69909	1.14771e-11	2.1816e-05	lpxB	2.4.1.182	GT19
MGYG000003648_00676	food_porridge_pulp_adm	1.72142	1.16171e-11	2.19637e-05	glgP	2.4.1.1	GT35
MGYG000172104_01237	food_gutthi_gripe_adm	1.45915	1.16436e-11	2.19916e-05		2.4.1.348	GT4
MGYG000029683_01741	food_porridge_pulp_adm	3.75317	1.19122e-11	2.22725e-05		3.2.1.4	GH5; GH9
MGYG000080197_00477	breast_feeding	3.80559	8.68114e-13	2.27929e-05	kojP	2.4.1.230; 2.4.1.64	GH65
MGYG000130030_00969	food_porridge_pulp_adm	4.68291	1.2669e-11	2.30488e-05		3.2.1.21	GH3
MGYG000184828_01963	food_animal_milk_adm	0.903196	1.29569e-11	2.33385e-05		3.2.1.177	GH31
MGYG000074473_00693	food_porridge_pulp_adm	1.34016	1.31716e-11	2.35527e-05	lacZ	3.2.1.23; 3.2.1.52	GH20
MGYG000285907_00643	food_porridge_pulp_adm	1.83513	1.32119e-11	2.35927e-05		3.2.1.21	GH3
MGYG000001182_00020	food_porridge_pulp_adm	2.96236	1.33295e-11	2.37091e-05	murG	2.4.1.227	GT28
MGYG000256484_01108	food_porridge_pulp_adm	2.12635	1.35064e-11	2.38834e-05	glgP	2.4.1.1; 2.4.1.11; 2.4.1.8	GH65; GT3; GT35
MGYG000023420_00070	food_gutthi_gripe_adm	0.576587	1.36931e-11	2.40663e-05		3.2.1.24	GH38
MGYG000001808_00422	food_porridge_pulp_adm	1.58064	1.376e-11	2.41314e-05		3.2.1.55	GH51
MGYG000005868_00024	food_porridge_pulp_adm	1.82325	1.38139e-11	2.41839e-05		2.4.1.129; 3.4.16.4	GT51
MGYG000194695_00374	food_porridge_pulp_adm	2.37368	1.41143e-11	2.44745e-05	surA	2.4.1.129; 3.4.16.4	GT51
MGYG000132368_01515	food_gutthi_gripe_adm	1.95036	1.44326e-11	2.47794e-05		3.2.1.18	GH33
MGYG000053858_01260	food_porridge_pulp_adm	2.42885	1.45558e-11	2.48965e-05		3.2.1.14	GH18
MGYG000232376_00450	food_porridge_pulp_adm	5.89005	1.56424e-11	2.59107e-05	envE	3.1.4.46; 3.2.1.18; 3.2.1.8	GH33
MGYG000286081_00053	food_animal_milk_adm	0.557254	1.5703e-11	2.59663e-05		3.2.1.14; 4.2.2.2	GH18
MGYG000056155_01305	breast_feeding	3.73696	1.1536e-12	2.64579e-05		2.4.1.333	GH94
MGYG000000421_00436	food_porridge_pulp_adm	1.90043	1.69233e-11	2.70655e-05		2.4.1.129; 3.4.16.4	GT51
MGYG000282074_00036	food_animal_milk_adm	1.5755	1.70043e-11	2.71371e-05		3.2.1.18	GH33
MGYG000072863_01112	food_porridge_pulp_adm	3.48561	1.72488e-11	2.73525e-05	glgP	2.4.1.1	GT35
MGYG000189959_00334	food_porridge_pulp_adm	1.71717	1.73011e-11	2.73983e-05		4.2.2.23	PL11
MGYG000083784_00725	food_porridge_pulp_adm	1.90889	1.73061e-11	2.74027e-05		3.2.1.156	GH8
MGYG000184316_02783	food_animal_milk_adm	1.35679	1.74083e-11	2.74921e-05	mtgA	2.4.1.129	GT51
MGYG000178113_00515	food_porridge_pulp_adm	2.94595	1.75847e-11	2.7646e-05	hylB	4.2.2.1	PL8
MGYG000000849_00026	food_gutthi_gripe_adm	0.593145	1.76755e-11	2.77249e-05	nagZ2	3.2.1.52	GH20
MGYG000004084_00745	food_porridge_pulp_adm	2.16566	1.77076e-11	2.77528e-05	tagA	2.4.1.187	GT26
MGYG000004762_01121	food_gutthi_gripe_adm	0.59802	1.79204e-11	2.79368e-05		3.2.1.177	GH31
MGYG000012482_01381	food_formula_powder_milk_adm	1.20879	1.82449e-11	2.82155e-05		3.2.1.1; 3.2.1.41	CBM48; GH13
MGYG000085825_01191	food_porridge_pulp_adm	5.80083	1.82972e-11	2.82602e-05	envE	3.1.4.46; 3.2.1.18; 3.2.1.8	GH33
MGYG000106532_02844	food_animal_milk_adm	0.908541	1.83176e-11	2.82776e-05	bglB_4	3.2.1.21	GH3
MGYG000078511_02108	food_porridge_pulp_adm	7.80513	1.83989e-11	2.83469e-05		3.2.1.86	GT1
MGYG000062293_02028	food_animal_milk_adm	1.12962	1.90885e-11	2.89295e-05		3.2.1.21	GH3
MGYG000070970_01832	food_gutthi_gripe_adm	1.30542	1.93037e-11	2.91093e-05	xyl3A_3	3.2.1.21	GH3
MGYG000138719_00212	food_porridge_pulp_adm	3.33823	1.98349e-11	2.95492e-05	glgB	2.4.1.18	CBM48; GH13
MGYG000003566_00701	food_animal_milk_adm	0.739474	1.99104e-11	2.96113e-05	glgP	2.4.1.1; 2.4.1.11; 2.4.1.8	GH65; GT3; GT35
MGYG000203106_00088	food_porridge_pulp_adm	2.01189	2.01523e-11	2.98094e-05		2.4.1.337	GT4
MGYG000004774_01719	food_porridge_pulp_adm	4.20169	2.01954e-11	2.98447e-05		3.2.1.86	GT1
MGYG000117353_01379	food_animal_milk_adm	1.39484	2.08805e-11	3.03995e-05		2.4.1.129; 3.4.16.4	GT51
MGYG000086529_01777	food_porridge_pulp_adm	1.54192	2.17086e-11	3.1059e-05		3.2.1.156	GH8
MGYG000000963_00041	food_gutthi_gripe_adm	0.541519	2.21604e-11	3.1414e-05	malQ	2.4.1.25	GH77
MGYG000153907_01653	food_porridge_pulp_adm	3.30412	2.22923e-11	3.15169e-05		2.4.1.129; 3.4.16.4	GT51
MGYG000086290_01405	food_porridge_pulp_adm	4.29902	2.2314e-11	3.15338e-05		2.4.1.83	GT2
MGYG000053858_01583	food_porridge_pulp_adm	2.47363	2.23851e-11	3.15892e-05		2.4.1.129; 3.4.16.4	GT51
MGYG000210058_01855	food_porridge_pulp_adm	3.3034	2.25381e-11	3.17081e-05	pulA	3.2.1.41	CBM48; GH13
MGYG000197476_00984	food_gutthi_gripe_adm	1.4347	2.28876e-11	3.19782e-05	MA20_05800	2.4.99.12; 2.4.99.13; 2.4.99.14; 2.4.99.15	GT30
MGYG000183435_00853	food_gutthi_gripe_adm	0.919364	2.30652e-11	3.21148e-05	bglB	3.2.1.21	GH3
MGYG000053059_01928	food_porridge_pulp_adm	1.70076	2.3233e-11	3.22434e-05		3.2.1.4	GH5; GH9
MGYG000100688_00052	food_porridge_pulp_adm	2.07636	2.3273e-11	3.22739e-05		3.2.1.78	GH26
MGYG000280327_01089	food_porridge_pulp_adm	1.58604	2.34992e-11	3.24465e-05		3.2.1.41	CBM48; GH13
MGYG000261992_00337	food_porridge_pulp_adm	2.6439	2.4019e-11	3.28399e-05		2.4.1.129; 3.4.16.4	GT51
MGYG000081785_00310	food_porridge_pulp_adm	1.98729	2.49868e-11	3.35623e-05		3.2.1.20	GH31
MGYG000036678_01316	food_porridge_pulp_adm	2.01728	2.52479e-11	3.37549e-05	wcoB	3.2.1.1; 3.2.1.4	GH13; GH5; GH9
MGYG000245594_01135	food_porridge_pulp_adm	1.63424	2.53858e-11	3.38563e-05		2.4.1.20	GT36
MGYG000129472_00417	food_porridge_pulp_adm	1.19077	2.58806e-11	3.42179e-05		3.2.1.20	GH31
MGYG000156434_01145	food_sugar_water_adm	0.629167	2.59934e-11	3.42999e-05		2.4.1.291	GT4
MGYG000024243_00845	food_animal_milk_adm	1.0464	2.73612e-11	3.52812e-05		3.2.1.52	GH20
MGYG000089916_02080	food_porridge_pulp_adm	3.03061	2.7531e-11	3.54014e-05	glgA	2.4.1.21	GT5
MGYG000050656_00884	food_gutthi_gripe_adm	0.582183	2.85182e-11	3.60937e-05		2.4.1.212	GT2
MGYG000135048_00567	food_porridge_pulp_adm	1.81099	2.88654e-11	3.63344e-05	murG	2.4.1.227	GT28
MGYG000170473_02028	food_animal_milk_adm	1.03352	2.88782e-11	3.63433e-05	amyA	3.2.1.1	GH57
MGYG000006444_00445	food_animal_milk_adm	1.34644	2.9028e-11	3.64468e-05	bglC1	3.2.1.21; 3.2.1.52	GH3
MGYG000000626_00588	food_porridge_pulp_adm	5.29791	3.02054e-11	3.72514e-05	murG	2.4.1.227	GT28
MGYG000002094_00170	food_porridge_pulp_adm	2.00994	3.0439e-11	3.74093e-05	malQ	2.4.1.25	GH77
MGYG000073259_00523	food_porridge_pulp_adm	1.78128	3.07887e-11	3.76446e-05		3.2.1.78	GH26
MGYG000001091_02334	food_porridge_pulp_adm	2.15986	3.14767e-11	3.8104e-05	mrcB	2.4.1.129; 3.4.16.4	GT51
MGYG000098155_00668	food_porridge_pulp_adm	3.32284	3.16567e-11	3.82234e-05		3.2.1.37; 3.2.1.55	GH43; GH51
MGYG000028194_01548	food_porridge_pulp_adm	5.36737	3.16806e-11	3.82393e-05	malQ_1	2.4.1.25	GH77
MGYG000002797_00042	food_porridge_pulp_adm	1.33754	3.17827e-11	3.83068e-05	bcsA	2.4.1.12	GT2
MGYG000126381_01415	food_porridge_pulp_adm	4.24758	3.19856e-11	3.84408e-05		3.2.1.172	GH105
MGYG000233986_01408	food_animal_milk_adm	1.47525	3.23646e-11	3.869e-05	CP_0153	3.2.1.4	GH5; GH9
MGYG000132723_00416	food_animal_milk_adm	0.704675	3.23745e-11	3.86965e-05		3.2.1.4	GH5; GH9
MGYG000111516_00415	food_porridge_pulp_adm	2.27184	3.25481e-11	3.88101e-05		3.2.1.99	GH43
MGYG000125847_01863	food_porridge_pulp_adm	2.77796	3.27808e-11	3.89621e-05		2.4.1.10; 3.5.1.28	GH68
MGYG000288666_01907	food_animal_milk_adm	1.17333	3.2875e-11	3.90235e-05		3.2.1.41	CBM48; GH13
MGYG000129396_01072	food_porridge_pulp_adm	3.13248	3.38504e-11	3.96541e-05		3.2.1.45	GH30
MGYG000106591_00457	food_gutthi_gripe_adm	0.548978	3.39176e-11	3.96972e-05	mrcA	2.4.1.129; 3.4.16.4	GT51
MGYG000224089_01833	food_porridge_pulp_adm	1.82102	3.47155e-11	4.02064e-05		4.2.2.1	PL8
MGYG000178890_01681	breast_feeding	3.2153	2.59054e-12	4.02071e-05		3.2.1.24	GH38
MGYG000041214_00678	food_porridge_pulp_adm	1.84699	3.57747e-11	4.08738e-05		3.2.1.4	GH5; GH9
MGYG000208663_01584	food_porridge_pulp_adm	4.6557	3.68462e-11	4.15398e-05	envE	3.1.4.46; 3.2.1.18; 3.2.1.8	GH33
MGYG000080044_00218	food_porridge_pulp_adm	4.45078	3.72084e-11	4.17628e-05		2.4.1.291	GT4
MGYG000165010_01356	food_porridge_pulp_adm	3.25074	3.74543e-11	4.19137e-05		3.2.1.4	GH5; GH9
MGYG000012197_00295	breast_feeding	4.2277	2.81421e-12	4.19472e-05		3.2.1.24	GH38
MGYG000004850_00640	food_porridge_pulp_adm	2.17036	3.76214e-11	4.20159e-05		2.4.1.1	GT35
MGYG000047715_00806	food_porridge_pulp_adm	1.80942	3.77213e-11	4.20769e-05	glgP	2.4.1.1	GT35
MGYG000266099_01410	food_porridge_pulp_adm	6.39962	3.82518e-11	4.23998e-05		3.2.1.37	GH43
MGYG000041040_00137	food_formula_powder_milk_adm	0.783285	3.85749e-11	4.25953e-05		2.4.1.349	GT4
MGYG000000403_01115	food_porridge_pulp_adm	1.43789	3.92973e-11	4.30299e-05		3.2.1.21	GH3
MGYG000139371_03069	food_animal_milk_adm	2.3793	3.98623e-11	4.33672e-05		3.2.1.37; 3.2.1.55	GH43; GH51
MGYG000001082_00691	food_porridge_pulp_adm	1.89685	4.03019e-11	4.36281e-05	amyE	3.2.1.1	GH13
MGYG000212847_01122	food_porridge_pulp_adm	2.19372	4.09207e-11	4.3993e-05	malZ	3.2.1.20; 3.2.1.41	CBM48; GH13; GH31
MGYG000104046_00493	food_porridge_pulp_adm	3.17415	4.30127e-11	4.52081e-05	murG	2.4.1.227	GT28
MGYG000000908_01083	food_porridge_pulp_adm	5.14073	4.37295e-11	4.56181e-05		3.2.1.51	GH29
MGYG000129932_00147	food_gutthi_gripe_adm	0.568082	4.37559e-11	4.56331e-05	glgP	2.4.1.1	GT35
MGYG000033502_00235	food_gutthi_gripe_adm	0.563086	4.43668e-11	4.59799e-05		3.2.1.4; 3.2.1.8	GH5; GH9
MGYG000130056_01423	food_porridge_pulp_adm	1.78704	4.46048e-11	4.61144e-05		4.2.2.1	PL8
MGYG000180813_00423	food_animal_milk_adm	1.79732	4.47905e-11	4.62192e-05	glgB	2.4.1.18	CBM48; GH13
MGYG000091147_00669	food_gutthi_gripe_adm	0.576536	4.4892e-11	4.62763e-05		3.2.1.51	GH29
MGYG000259899_01517	food_sugar_water_adm	0.545591	4.49441e-11	4.63056e-05		3.2.1.172	GH105
MGYG000145532_03296	food_animal_milk_adm	1.31191	4.49977e-11	4.63358e-05	mngB	3.2.1.170	GH38
MGYG000140944_01535	food_porridge_pulp_adm	1.70097	4.66248e-11	4.72428e-05		3.2.1.1	GH13
MGYG000277368_00174	food_porridge_pulp_adm	2.11627	4.74159e-11	4.76784e-05	glgA	2.4.1.21	GT5
MGYG000216596_00301	food_porridge_pulp_adm	2.3613	4.74377e-11	4.76904e-05		2.4.1.315	GT28
MGYG000003424_00919	food_gutthi_gripe_adm	0.565365	4.75944e-11	4.77763e-05		3.2.1.21	GH3
MGYG000005302_01690	food_gutthi_gripe_adm	0.563295	5.07608e-11	4.94838e-05		3.2.1.177	GH31
MGYG000110880_01821	food_porridge_pulp_adm	0.981631	5.12094e-11	4.97216e-05		4.2.2.5	PL8
MGYG000003532_00087	food_porridge_pulp_adm	1.4636	5.19321e-11	5.01027e-05		3.2.1.1	GH13
MGYG000036564_01592	food_porridge_pulp_adm	1.90489	5.34769e-11	5.0909e-05	malP_1	2.4.1.1	GT35
MGYG000167855_00986	food_gutthi_gripe_adm	0.982866	5.42524e-11	5.13097e-05	surA	2.4.1.129; 3.4.16.4	GT51
MGYG000044543_00787	food_porridge_pulp_adm	1.98943	5.46188e-11	5.1498e-05	ponA	2.4.1.129; 3.4.16.4	GT51
MGYG000053059_00300	food_porridge_pulp_adm	3.84344	5.49105e-11	5.16476e-05	glgP	2.4.1.1	GT35
MGYG000208272_00528	food_porridge_pulp_adm	2.16817	5.61824e-11	5.22952e-05		3.2.1.1	GH13
MGYG000029067_01438	food_porridge_pulp_adm	3.02491	5.62294e-11	5.2319e-05		2.4.1.339; 2.4.1.340	GH130
MGYG000169946_00013	food_gutthi_gripe_adm	1.58156	5.72968e-11	5.28571e-05		3.2.1.14	GH18
MGYG000244135_01696	food_porridge_pulp_adm	3.89223	5.79029e-11	5.31605e-05		3.2.1.37; 3.2.1.55	GH43; GH51
MGYG000282230_00266	food_porridge_pulp_adm	3.03441	5.99843e-11	5.41912e-05	malQ_1	2.4.1.25	GH77
MGYG000160841_02036	food_gutthi_gripe_adm	0.513413	6.04941e-11	5.44411e-05		3.2.1.78	GH26
MGYG000037031_00588	food_porridge_pulp_adm	2.39583	6.10561e-11	5.47154e-05	malQ	2.4.1.25	GH77
MGYG000228945_01906	breast_feeding	4.22869	4.83543e-12	5.52127e-05	bglB	3.2.1.21	GH3
MGYG000258525_01098	food_porridge_pulp_adm	1.83888	6.24487e-11	5.539e-05	glfT1	2.4.1.287	GT2
MGYG000000908_01202	food_porridge_pulp_adm	5.36697	6.32334e-11	5.57671e-05		3.2.1.1; 3.2.1.10; 3.2.1.70	GH13
MGYG000072105_01812	food_porridge_pulp_adm	1.68522	6.41832e-11	5.62205e-05	glgB	2.4.1.18	CBM48; GH13
MGYG000001255_01477	food_porridge_pulp_adm	6.1963	6.47719e-11	5.64999e-05	scrB	3.2.1.26	GH32
MGYG000002878_00145	food_gutthi_gripe_adm	0.555498	6.48776e-11	5.655e-05		3.2.1.21	GH3
MGYG000274779_00429	food_gutthi_gripe_adm	1.50121	6.55292e-11	5.68577e-05		3.2.1.86	GT1
MGYG000251505_01255	food_porridge_pulp_adm	1.55795	6.66515e-11	5.73843e-05	otsB	2.4.1.15; 3.1.3.12	GT20
MGYG000062301_00729	food_porridge_pulp_adm	2.05753	6.76671e-11	5.78572e-05		3.2.1.78	GH26
MGYG000038129_00717	food_gutthi_gripe_adm	1.36377	6.7945e-11	5.7986e-05		3.2.1.177	GH31
MGYG000103832_00194	food_gutthi_gripe_adm	0.562959	6.80924e-11	5.80542e-05	glgB	2.4.1.18	CBM48; GH13
MGYG000126381_01189	food_porridge_pulp_adm	3.77752	7.08802e-11	5.93317e-05		3.2.1.55	GH51
MGYG000218256_00363	food_porridge_pulp_adm	2.14577	7.13036e-11	5.95237e-05	malQ	2.4.1.25	GH77
MGYG000148017_00767	food_gutthi_gripe_adm	0.826272	7.32123e-11	6.03823e-05		3.2.1.21	GH3
MGYG000113279_00149	food_porridge_pulp_adm	3.32096	7.458e-11	6.0991e-05		2.4.1.52	GT4
MGYG000170178_01238	food_animal_milk_adm	1.58889	7.51025e-11	6.12222e-05	glgX	3.2.1.68	CBM48; GH13
MGYG000002797_00078	food_porridge_pulp_adm	2.35226	7.53391e-11	6.13267e-05	xynA2	3.2.1.37; 3.2.1.55; 3.2.1.8	GH43; GH51
MGYG000234146_00829	food_gutthi_gripe_adm	0.507161	7.63412e-11	6.17672e-05		3.2.1.52	GH20
MGYG000286510_00624	food_animal_milk_adm	1.6779	7.68365e-11	6.1984e-05		3.2.1.24	GH38
MGYG000208563_01732	food_porridge_pulp_adm	2.37288	7.68521e-11	6.19908e-05		3.2.1.4	GH5; GH9
MGYG000268369_06021	food_porridge_pulp_adm	3.28642	7.71948e-11	6.21404e-05		2.4.1.52	GT4
MGYG000190346_00514	food_gutthi_gripe_adm	1.04768	7.79677e-11	6.24766e-05	malQ	2.4.1.25	GH77
MGYG000158989_00534	food_animal_milk_adm	2.00495	7.81194e-11	6.25424e-05	gtfB	2.4.1.5	GH13
MGYG000004752_00503	food_porridge_pulp_adm	3.69849	8.03856e-11	6.35182e-05		3.2.1.68	CBM48; GH13
MGYG000026060_00103	food_porridge_pulp_adm	1.52772	8.16544e-11	6.40589e-05		3.2.1.4	GH5; GH9
MGYG000034799_01213	food_porridge_pulp_adm	1.93731	8.18003e-11	6.41208e-05		3.2.1.21	GH3
MGYG000003444_00483	food_gutthi_gripe_adm	0.546803	8.57384e-11	6.57728e-05		3.2.1.20	GH31
MGYG000096293_01353	food_porridge_pulp_adm	1.59951	8.92385e-11	6.72111e-05		4.2.2.1	PL8
MGYG000066006_01108	food_porridge_pulp_adm	3.39498	9.13423e-11	6.80627e-05	murG	2.4.1.227	GT28
MGYG000193810_01386	food_porridge_pulp_adm	1.28385	9.33775e-11	6.88778e-05		3.2.1.156	GH8
MGYG000035140_02071	food_porridge_pulp_adm	1.69116	9.66948e-11	7.01885e-05		2.4.1.129; 3.4.16.4	GT51
MGYG000118795_02998	food_porridge_pulp_adm	1.71992	1.01241e-10	7.19505e-05		2.4.1.129; 3.4.16.4	GT51
MGYG000170546_00322	food_porridge_pulp_adm	1.67649	1.01484e-10	7.20436e-05		3.2.1.1	GH57
MGYG000092247_00897	food_animal_milk_adm	1.07782	1.01539e-10	7.20648e-05	murG	2.4.1.227	GT28
MGYG000235273_00446	food_porridge_pulp_adm	1.17176	1.01883e-10	7.21962e-05		3.2.1.172	GH105
MGYG000004871_01081	food_animal_milk_adm	0.856402	1.01971e-10	7.22298e-05	susB	3.2.1.20; 3.2.1.3	GH31; GH97
MGYG000223124_00777	food_porridge_pulp_adm	3.74189	1.02303e-10	7.23569e-05		3.2.1.1; 3.2.1.11; 3.2.1.78; 3.2.1.8; 3.2.1.80; 3.2.1.89	GH13; GH26; GH66
MGYG000004850_00470	food_porridge_pulp_adm	2.21488	1.04666e-10	7.32532e-05		2.4.1.129; 3.4.16.4	GT51
MGYG000202205_01208	food_porridge_pulp_adm	2.44155	1.05154e-10	7.34374e-05	xylS	3.2.1.20	GH31
MGYG000078745_00492	food_porridge_pulp_adm	2.30022	1.07559e-10	7.43381e-05		3.2.1.51	GH29
MGYG000011969_01025	food_porridge_pulp_adm	2.73336	1.11489e-10	7.57895e-05		3.2.1.68	CBM48; GH13
MGYG000204727_00965	food_porridge_pulp_adm	2.54433	1.12255e-10	7.60696e-05		2.4.1.337	GT4
MGYG000276861_00485	food_porridge_pulp_adm	4.04163	1.14218e-10	7.67832e-05		2.4.1.337	GT4
MGYG000235763_01868	food_animal_milk_adm	1.4672	1.1591e-10	7.73935e-05	malL	3.2.1.1; 3.2.1.10	GH13
MGYG000156018_00425	food_porridge_pulp_adm	2.02382	1.18527e-10	7.83294e-05	chiB	3.2.1.14	GH18
MGYG000130990_01209	food_gutthi_gripe_adm	1.35157	1.22396e-10	7.96952e-05	glgP	2.4.1.1	GT35
MGYG000052616_00084	food_gutthi_gripe_adm	0.535747	1.23202e-10	7.99769e-05		3.2.1.21	GH3
MGYG000117810_00269	food_porridge_pulp_adm	1.89215	1.27967e-10	8.16258e-05		2.4.1.83	GT2
MGYG000219180_00053	food_porridge_pulp_adm	2.29386	1.28581e-10	8.18361e-05		3.2.1.4	GH5; GH9
MGYG000006927_03461	food_animal_milk_adm	2.50002	1.3116e-10	8.27145e-05		3.2.1.52	GH20
MGYG000089268_03873	food_porridge_pulp_adm	2.45967	1.32656e-10	8.32199e-05	treA	3.2.1.28	GH37
MGYG000213747_01595	food_porridge_pulp_adm	1.59761	1.33559e-10	8.3524e-05		3.2.1.4	GH5; GH9
MGYG000003355_00874	food_porridge_pulp_adm	1.69088	1.34887e-10	8.39692e-05		3.2.1.99	GH43
MGYG000007288_01673	food_porridge_pulp_adm	5.67054	1.35485e-10	8.41689e-05	celC	3.2.1.4	GH5; GH9
MGYG000123472_00835	food_formula_powder_milk_adm	1.12552	1.35796e-10	8.42726e-05	pmt	2.4.1.109	GT39
MGYG000140364_00230	food_porridge_pulp_adm	2.07731	1.36792e-10	8.46042e-05		3.2.1.51	GH29
MGYG000119219_01988	food_porridge_pulp_adm	4.31583	1.37185e-10	8.47345e-05		3.2.1.21	GH3
MGYG000131180_00197	food_porridge_pulp_adm	2.38276	1.40115e-10	8.57016e-05	glgB	2.4.1.18; 3.2.1.141	CBM48; GH13
MGYG000002530_01475	food_porridge_pulp_adm	1.69789	1.45463e-10	8.7442e-05	treA	3.2.1.10; 3.2.1.93	GH13
MGYG000115874_01065	food_formula_powder_milk_adm	0.71134	1.45698e-10	8.75179e-05		4.2.2.23	PL11
MGYG000275217_01674	food_porridge_pulp_adm	4.29996	1.49652e-10	8.87842e-05	celM	3.2.1.4	GH5; GH9
MGYG000279218_01518	food_porridge_pulp_adm	2.48721	1.49721e-10	8.88062e-05		3.2.1.11; 3.2.1.4	GH5; GH66; GH9
MGYG000163570_00784	food_animal_milk_adm	1.54949	1.5039e-10	8.90188e-05	cepA	2.4.1.20	GT36
MGYG000202205_01046	food_porridge_pulp_adm	2.06324	1.51134e-10	8.92547e-05	dexB	2.4.1.7; 3.2.1.20; 3.2.1.51; 3.2.1.70; 3.2.1.8; 3.2.1.93; 3.2.1.97; 4.2.2.5	GH101; GH13; GH29; GH31; PL8
MGYG000040674_01702	food_porridge_pulp_adm	3.24363	1.55419e-10	9.06029e-05		3.2.1.4	GH5; GH9
MGYG000264797_00569	food_porridge_pulp_adm	1.56144	1.5584e-10	9.07343e-05		4.2.2.5	PL8
MGYG000000623_02148	food_porridge_pulp_adm	2.12857	1.56734e-10	9.10128e-05		4.2.2.5	PL8
MGYG000097747_01256	food_tea_adm	0.520327	1.56741e-10	9.10153e-05		3.2.1.40; 3.2.1.97	GH101
MGYG000132697_00171	breast_feeding	4.03802	1.33973e-11	9.17153e-05	glfT	2.4.1.288	GT2
MGYG000281057_01463	food_gutthi_gripe_adm	0.711943	1.62277e-10	9.27238e-05		3.2.1.21	GH3
MGYG000109259_00283	food_porridge_pulp_adm	3.24353	1.6334e-10	9.30489e-05		2.4.1.337	GT4
MGYG000158855_02751	food_porridge_pulp_adm	1.45829	1.64978e-10	9.35475e-05		3.2.1.21; 3.2.1.52	GH3
MGYG000149341_00602	food_porridge_pulp_adm	1.76785	1.69046e-10	9.47756e-05		3.2.1.1	GH13
MGYG000065333_00955	food_porridge_pulp_adm	2.52738	1.70722e-10	9.52776e-05	murG	2.4.1.227	GT28
MGYG000003089_00483	food_porridge_pulp_adm	1.52651	1.71525e-10	9.55172e-05		2.4.1.129; 3.4.16.4	GT51
MGYG000134072_02440	food_animal_milk_adm	0.690412	1.72244e-10	9.57314e-05		3.2.1.172	GH105
MGYG000111967_00824	food_porridge_pulp_adm	4.0066	1.76933e-10	9.71175e-05	murG	2.4.1.227	GT28
MGYG000048866_01173	food_gutthi_gripe_adm	1.43769	1.82785e-10	9.88227e-05		3.2.1.21	GH3
MGYG000209788_03010	food_animal_milk_adm	1.24262	1.84065e-10	9.91922e-05	ycjM	2.4.1.7	GH13
MGYG000017013_00736	food_animal_milk_adm	0.610381	1.89464e-10	0.000100737		3.2.1.4	GH5; GH9
MGYG000062170_01181	food_porridge_pulp_adm	3.16016	1.90172e-10	0.000100938		3.2.1.21	GH3
MGYG000144230_01613	food_porridge_pulp_adm	2.50025	1.90446e-10	0.000101016		3.2.1.21	GH3
MGYG000001095_02284	food_animal_milk_adm	1.08231	1.92043e-10	0.000101468		3.2.1.51	GH29
MGYG000026814_04216	food_animal_milk_adm	1.66784	2.03705e-10	0.000104714		3.2.1.37	GH43
MGYG000263663_00019	food_porridge_pulp_adm	6.05788	2.03706e-10	0.000104715		3.2.1.180	GH88
MGYG000030962_01078	food_porridge_pulp_adm	2.75395	2.04471e-10	0.000104924		3.2.1.52	GH20
MGYG000085305_01768	food_porridge_pulp_adm	2.66262	2.09653e-10	0.000106335	sacB	2.4.1.10; 2.4.1.9	GH68
MGYG000010674_00788	food_porridge_pulp_adm	5.50766	2.09977e-10	0.000106423	pulA	3.2.1.41	CBM48; GH13
MGYG000024802_00747	food_porridge_pulp_adm	2.61154	2.10825e-10	0.000106652		3.2.1.4; 3.2.1.8	GH5; GH9
MGYG000062940_01567	food_porridge_pulp_adm	2.16936	2.11319e-10	0.000106786	malQ	2.4.1.25	GH77
MGYG000112726_01740	food_animal_milk_adm	2.03003	2.15409e-10	0.000107883		2.4.1.293	GT2
MGYG000090499_00659	food_porridge_pulp_adm	1.99528	2.18103e-10	0.000108601	ydaM	2.4.1.336	GT2
MGYG000191015_01780	food_porridge_pulp_adm	3.13514	2.27694e-10	0.000111122		3.2.1.1	GH13
MGYG000001298_02447	food_porridge_pulp_adm	1.64606	2.2885e-10	0.000111423		3.2.1.4	GH5; GH9
MGYG000000626_00305	food_porridge_pulp_adm	4.64276	2.29427e-10	0.000111572	malQ	2.4.1.25	GH77
MGYG000135985_02468	food_animal_milk_adm	1.29441	2.29725e-10	0.00011165		3.2.1.21	GH3
MGYG000059297_00378	food_porridge_pulp_adm	2.31595	2.33354e-10	0.000112586		2.4.1.315	GT28
MGYG000031501_00564	food_porridge_pulp_adm	2.34545	2.33793e-10	0.000112699		4.1.1.105; 4.1.1.28	GH23
MGYG000218533_00951	food_porridge_pulp_adm	3.74855	2.43348e-10	0.00011513		3.2.1.1	GH13
MGYG000051275_00338	food_porridge_pulp_adm	1.94063	2.43464e-10	0.000115159		3.2.1.51	GH29
MGYG000270124_00690	food_porridge_pulp_adm	2.77959	2.51402e-10	0.000117143	glgA	2.4.1.21	GT5
MGYG000060091_00077	food_porridge_pulp_adm	1.60396	2.59503e-10	0.000119137		2.4.1.129; 3.4.16.4	GT51
MGYG000004850_00940	food_porridge_pulp_adm	1.68155	2.60514e-10	0.000119383		3.2.1.51	GH29
MGYG000100945_00567	food_porridge_pulp_adm	3.32487	2.60611e-10	0.000119407	envE	3.1.4.46; 3.2.1.18; 3.2.1.8	GH33
MGYG000190837_00855	food_gutthi_gripe_adm	1.02613	2.61653e-10	0.000119661		3.2.1.1; 3.2.1.41	CBM48; GH13
MGYG000271683_00336	food_porridge_pulp_adm	2.70164	2.62714e-10	0.000119919		4.2.2.5	PL8
MGYG000249575_01069	food_porridge_pulp_adm	2.29512	2.63331e-10	0.000120068		3.2.1.86	GT1
MGYG000262642_00963	food_animal_milk_adm	1.40486	2.68811e-10	0.000121391		3.2.1.21	GH3
MGYG000263253_01520	food_animal_milk_adm	0.815981	2.70628e-10	0.000121827	glgA	2.4.1.21	GT5
MGYG000118967_01954	food_porridge_pulp_adm	1.57972	2.70918e-10	0.000121896		3.2.1.177	GH31
MGYG000002008_00743	food_porridge_pulp_adm	2.06884	2.77498e-10	0.000123461		3.2.1.133; 3.2.1.135; 3.2.1.54; 3.5.4.33	GH13
MGYG000196637_00863	food_porridge_pulp_adm	2.26458	2.77916e-10	0.00012356	abf2	3.2.1.55	GH51
MGYG000000908_00928	food_porridge_pulp_adm	5.1971	2.81274e-10	0.000124351		2.4.1.25	GH77
MGYG000130204_01507	food_porridge_pulp_adm	4.27266	2.82209e-10	0.00012457		3.2.1.4	GH5; GH9
MGYG000018072_01635	food_porridge_pulp_adm	1.58751	2.88032e-10	0.00012593		3.2.1.21	GH3
MGYG000274899_00791	food_porridge_pulp_adm	1.28264	2.93994e-10	0.000127307		3.2.1.21	GH3
MGYG000005729_01356	food_porridge_pulp_adm	2.05055	2.94081e-10	0.000127327	amyS	3.2.1.1	GH13
MGYG000071443_00244	food_porridge_pulp_adm	1.64724	2.95839e-10	0.000127731		2.4.1.280	GH94
MGYG000189489_01817	food_porridge_pulp_adm	1.5227	2.97524e-10	0.000128117		3.2.1.4	GH5; GH9
MGYG000004712_01377	food_porridge_pulp_adm	2.39129	2.98737e-10	0.000128394		3.2.1.40; 3.2.1.55	CBM6; GH43
MGYG000153149_01391	food_tea_adm	0.731433	3.0096e-10	0.0001289		3.2.1.1; 3.2.1.41	CBM48; GH13
MGYG000087786_00886	breast_feeding	2.69523	2.7006e-11	0.000129094		3.2.1.51	GH29
MGYG000038116_00742	food_porridge_pulp_adm	4.22846	3.02921e-10	0.000129345		2.4.1.129; 3.4.16.4	GT51
MGYG000026814_05049	food_animal_milk_adm	1.73847	3.05598e-10	0.000129951		3.2.1.26	GH32
MGYG000211653_01341	food_porridge_pulp_adm	6.02706	3.11405e-10	0.000131255		4.2.2.23	PL11
MGYG000000282_02094	food_porridge_pulp_adm	4.66004	3.12961e-10	0.000131603	malQ	2.4.1.25	GH77
MGYG000001876_01402	food_porridge_pulp_adm	4.10677	3.24195e-10	0.000134088		3.2.1.21	GH3
MGYG000114668_00501	food_animal_milk_adm	1.46375	3.34018e-10	0.000136227		3.2.1.24	GH38
MGYG000052295_01615	food_formula_powder_milk_adm	2.09263	3.34571e-10	0.000136346	bglB	3.2.1.21	GH3
MGYG000217472_01486	food_porridge_pulp_adm	3.17832	3.37429e-10	0.000136963		4.2.2.5	PL8
MGYG000003421_01327	food_porridge_pulp_adm	1.50986	3.37537e-10	0.000136986		3.2.1.177	GH31
MGYG000240141_01148	food_animal_milk_adm	1.95182	3.51314e-10	0.00013992	glgP	2.4.1.1	GT35
MGYG000004712_01363	food_porridge_pulp_adm	2.80252	3.57511e-10	0.000141222		3.2.1.4	GH5; GH9
MGYG000110737_00581	food_porridge_pulp_adm	4.37226	3.61232e-10	0.000141998	malQ	2.4.1.25	GH77
MGYG000146738_01747	food_animal_milk_adm	1.59756	3.69727e-10	0.000143756		3.2.1.55	GH51
MGYG000061603_00267	food_animal_milk_adm	1.10061	3.69834e-10	0.000143778		2.4.1.20	GT36
MGYG000176145_01440	food_porridge_pulp_adm	1.49943	3.70139e-10	0.000143841		3.2.1.18	GH33
MGYG000119348_00328	food_animal_milk_adm	1.77549	3.71626e-10	0.000144146	pulA	3.2.1.41	CBM48; GH13
MGYG000199806_01087	food_porridge_pulp_adm	2.40114	3.73831e-10	0.000144598		3.2.1.51	GH95
MGYG000261040_00863	food_porridge_pulp_adm	2.64118	3.74229e-10	0.00014468		3.2.1.4	GH5; GH9
MGYG000163407_01091	food_animal_milk_adm	1.08771	3.75059e-10	0.00014485	glgX	3.2.1.196; 3.2.1.41; 3.2.1.68	CBM48; GH13
MGYG000000626_00484	food_porridge_pulp_adm	4.63709	3.75968e-10	0.000145035		2.4.1.21	GT5
MGYG000044384_01964	food_animal_milk_adm	1.48728	3.77841e-10	0.000145417		3.2.1.45	GH30
MGYG000000176_03314	food_gutthi_gripe_adm	0.892673	3.78368e-10	0.000145524		3.1.4.46; 3.2.1.14; 3.2.1.55	GH18; GH51
MGYG000224605_00801	food_porridge_pulp_adm	4.67984	3.78605e-10	0.000145573		3.2.1.55	CBM6; GH43
MGYG000214915_01751	food_porridge_pulp_adm	3.03169	3.81552e-10	0.000146171	celA	3.2.1.4	GH5; GH9
MGYG000066032_00632	food_porridge_pulp_adm	1.69191	3.83535e-10	0.000146572		2.4.1.129; 3.4.16.4	GT51
MGYG000057774_00851	food_porridge_pulp_adm	1.61657	3.87837e-10	0.00014744	glgA	2.4.1.21	GT5
MGYG000003777_00150	food_gutthi_gripe_adm	0.861546	3.93284e-10	0.000148531	pulA	3.2.1.41	CBM48; GH13
MGYG000231117_01381	food_animal_milk_adm	1.60815	3.95916e-10	0.000149056		3.2.1.51	GH29
MGYG000192388_01101	food_porridge_pulp_adm	4.12505	4.1268e-10	0.000152359		3.2.1.1; 3.5.1.28	GH13
MGYG000233318_01143	food_sugar_water_adm	0.982088	4.13775e-10	0.000152572		2.4.1.20	GT36
MGYG000168652_00222	food_porridge_pulp_adm	2.82135	4.20629e-10	0.000153903	glgP	2.4.1.1	GT35
MGYG000173199_01102	food_porridge_pulp_adm	1.64551	4.22232e-10	0.000154212		3.2.1.78	GH26
MGYG000065007_00577	food_porridge_pulp_adm	2.74772	4.29868e-10	0.000155679	CP_0954	4.2.2.1	PL8
MGYG000230501_00664	food_porridge_pulp_adm	1.51533	4.34779e-10	0.000156615		3.2.1.78	GH26
MGYG000001052_02220	food_porridge_pulp_adm	1.33488	4.51219e-10	0.000159714		3.2.1.21	GH3
MGYG000208091_01198	breast_feeding	4.18921	4.2377e-11	0.000160327		3.2.1.99	GH43
MGYG000086075_00095	food_porridge_pulp_adm	1.52212	4.56314e-10	0.000160663		3.2.1.37	GH43
MGYG000006465_01063	food_porridge_pulp_adm	4.51187	4.75804e-10	0.000164246		3.2.1.133; 3.2.1.135; 3.2.1.54; 3.5.4.33	GH13
MGYG000004884_00663	food_porridge_pulp_adm	2.33899	4.88014e-10	0.000166455		3.2.1.172	GH105
MGYG000259063_01158	food_gutthi_gripe_adm	1.62647	4.93474e-10	0.000167434		3.2.1.21	GH3
MGYG000126251_00284	food_formula_powder_milk_adm	0.781021	5.09852e-10	0.000170339		4.2.2.7	PL13
MGYG000162002_00926	food_porridge_pulp_adm	2.52416	5.12896e-10	0.000170874		2.4.1.315	GT28
MGYG000175006_00311	food_porridge_pulp_adm	1.33827	5.15806e-10	0.000171384	glgP	2.4.1.1	GT35
MGYG000007028_02344	food_porridge_pulp_adm	1.93559	5.24609e-10	0.000172918	chiD	3.2.1.14	GH18
MGYG000000908_00782	food_porridge_pulp_adm	5.12003	5.27277e-10	0.00017338	bglC	3.2.1.86	GT1
MGYG000188852_00059	food_porridge_pulp_adm	4.36593	5.50211e-10	0.000177309		3.2.1.78	GH26
MGYG000223578_02384	food_animal_milk_adm	1.70223	5.51082e-10	0.000177456	glgB	2.4.1.18	CBM48; GH13
MGYG000218812_01060	food_animal_milk_adm	0.958893	5.59982e-10	0.000178958	glgA	2.4.1.21	GT5
MGYG000019147_00923	food_porridge_pulp_adm	1.24651	5.603e-10	0.000179012		3.2.1.78	GH26
MGYG000215408_02256	food_porridge_pulp_adm	2.86923	5.6299e-10	0.000179463		4.2.2.1	PL8
MGYG000170427_01662	food_gutthi_gripe_adm	0.897503	5.6321e-10	0.0001795		3.2.1.51	GH29
MGYG000263184_00535	food_animal_milk_adm	1.20483	5.64014e-10	0.000179635		3.2.1.55	GH51
MGYG000235442_01408	food_porridge_pulp_adm	1.9184	5.76591e-10	0.00018173		3.2.1.21; 3.2.1.52	GH3
MGYG000259459_00363	food_porridge_pulp_adm	2.39328	5.78769e-10	0.000182091	glgP	2.4.1.1	GT35
MGYG000136887_01409	food_porridge_pulp_adm	2.035	5.80255e-10	0.000182337	celA	3.2.1.4	GH5; GH9
MGYG000122106_01603	food_porridge_pulp_adm	2.16146	5.81094e-10	0.000182475		3.2.1.21	GH3
MGYG000006844_02152	food_gutthi_gripe_adm	1.59268	5.85831e-10	0.000183256		3.2.1.21	GH3
MGYG000213739_02550	food_porridge_pulp_adm	1.68059	5.9305e-10	0.000184439	glgB	2.4.1.18	CBM48; GH13
MGYG000057774_01109	food_porridge_pulp_adm	2.05362	5.93719e-10	0.000184548		3.2.1.20; 3.2.1.8	GH31
MGYG000171375_00098	food_porridge_pulp_adm	1.53754	5.95944e-10	0.000184911	celA7	3.2.1.4; 3.2.1.78	AA10; CBM73; GH26; GH5; GH9
MGYG000047954_01252	food_porridge_pulp_adm	3.36716	6.0135e-10	0.000185791		3.2.1.78	GH26
MGYG000001412_04684	food_porridge_pulp_adm	3.27313	6.09655e-10	0.000187135	bglA	3.2.1.86	GT1
MGYG000008001_01098	food_porridge_pulp_adm	3.92778	6.18301e-10	0.000188524	gtfA	2.4.1.52	GT4
MGYG000283805_00083	food_animal_milk_adm	1.07677	6.18409e-10	0.000188541		3.2.1.21	GH3
MGYG000197199_00246	food_porridge_pulp_adm	2.82472	6.27166e-10	0.000189939	dex	3.2.1.11	GH66
MGYG000203938_02085	food_animal_milk_adm	1.5821	6.27203e-10	0.000189944		2.4.1.129; 3.4.16.4	GT51
MGYG000008089_01015	food_porridge_pulp_adm	3.25469	6.51025e-10	0.000193698	glgA	2.4.1.21	GT5
MGYG000059162_01528	food_animal_milk_adm	1.06599	6.62852e-10	0.000195537		3.2.1.55	GH51
MGYG000176502_01379	food_porridge_pulp_adm	3.24296	6.7541e-10	0.000197471		2.4.1.18; 3.2.1.141	CBM48; GH13
MGYG000159936_00107	food_porridge_pulp_adm	3.21462	6.81481e-10	0.0001984	apu	2.4.1.25; 3.2.1.133; 3.2.1.135; 3.2.1.20; 3.2.1.54	GH13; GH31; GH77
MGYG000014318_00335	food_gutthi_gripe_adm	0.804582	6.84241e-10	0.000198821		4.2.2.1	PL8
MGYG000000901_01500	food_tea_adm	0.377545	6.89301e-10	0.000199591	malQ	2.4.1.25	GH77
MGYG000000181_01294	food_animal_milk_adm	0.717185	7.15968e-10	0.000203602		3.2.1.20	GH31
MGYG000000908_00725	food_porridge_pulp_adm	5.32868	7.29184e-10	0.000205562	murG	2.4.1.227	GT28
MGYG000275872_00842	food_formula_powder_milk_adm	1.55821	7.29767e-10	0.000205649		3.2.1.177	GH31
MGYG000024614_01091	food_porridge_pulp_adm	2.17532	7.34955e-10	0.000206413		3.2.1.55	CBM6; GH43
MGYG000001185_00556	food_porridge_pulp_adm	2.01398	7.43482e-10	0.000207664		2.4.1.129; 3.4.16.4	GT51
MGYG000007568_00226	food_porridge_pulp_adm	2.71033	7.47284e-10	0.00020822		2.4.1.83	GT2
MGYG000278148_00459	food_animal_milk_adm	1.44648	7.49569e-10	0.000208553		2.4.1.129; 3.4.16.4	GT51
MGYG000024802_00747	food_animal_milk_adm	1.92072	7.54797e-10	0.000209313		3.2.1.4; 3.2.1.8	GH5; GH9
MGYG000037281_01542	food_gutthi_gripe_adm	1.4694	7.57483e-10	0.000209703	lpxB	2.4.1.182	GT19
MGYG000030990_00316	food_porridge_pulp_adm	1.81526	7.60461e-10	0.000210134	malL_2	3.2.1.1; 3.2.1.10; 3.2.1.70	GH13
MGYG000007404_01352	food_animal_milk_adm	1.91699	7.75267e-10	0.000212266		2.4.1.144	GT17
MGYG000005421_00639	food_porridge_pulp_adm	2.58421	7.9251e-10	0.000214724		2.4.1.18	GH57
MGYG000179021_01465	food_porridge_pulp_adm	2.54552	8.0116e-10	0.000215947		3.2.1.18	GH33
MGYG000149877_01779	food_porridge_pulp_adm	4.78587	8.12321e-10	0.000217515		2.4.1.5	GH13
MGYG000162948_01068	food_formula_powder_milk_adm	0.826198	8.15431e-10	0.000217951		3.2.1.45	GH30
MGYG000126295_00887	food_porridge_pulp_adm	4.22363	8.27017e-10	0.000219565		3.2.1.78	GH26
MGYG000004884_00465	food_porridge_pulp_adm	2.67113	8.31445e-10	0.000220179		3.2.1.177	GH31
MGYG000200869_00572	breast_feeding	3.94632	8.424e-11	0.000222114	malQ	2.4.1.25	GH77
MGYG000113263_01442	food_porridge_pulp_adm	1.94142	8.61742e-10	0.000224337		3.2.1.78	GH26
MGYG000042786_02470	food_porridge_pulp_adm	1.24085	8.62243e-10	0.000224405		3.2.1.4	GH5; GH9
MGYG000133866_00168	food_gutthi_gripe_adm	2.49049	8.89056e-10	0.000228024		3.2.1.18	GH33
MGYG000041490_00655	food_porridge_pulp_adm	1.55179	9.03377e-10	0.000229935	surA	2.4.1.129; 3.4.16.4	GT51
MGYG000108794_00469	food_porridge_pulp_adm	1.75936	9.09226e-10	0.000230711		2.4.1.291	GT4
MGYG000237249_01039	food_gutthi_gripe_adm	0.851728	9.10337e-10	0.000230859		3.2.1.135	GH13
MGYG000229952_06526	food_porridge_pulp_adm	2.75448	9.12645e-10	0.000231164	malQ	2.4.1.25	GH77
MGYG000002264_00289	food_porridge_pulp_adm	1.75422	9.41842e-10	0.000234995		2.4.1.109	GT39
MGYG000247187_01782	food_porridge_pulp_adm	4.42071	9.46085e-10	0.000235547	treA	3.2.1.28	GH37
MGYG000132109_02010	food_porridge_pulp_adm	6.11217	9.54664e-10	0.000236659	glgB	2.4.1.18	CBM48; GH13
MGYG000003313_00297	food_porridge_pulp_adm	3.14571	9.68023e-10	0.000238381		3.2.1.177	GH31
MGYG000037096_01192	food_porridge_pulp_adm	1.39737	9.85254e-10	0.000240585		3.2.1.156	GH8
MGYG000204452_01185	food_porridge_pulp_adm	4.45258	9.88538e-10	0.000241003		3.2.1.37; 3.2.1.55	GH43; GH51
MGYG000181492_00584	food_porridge_pulp_adm	7.03222	9.88982e-10	0.00024106	malL	3.2.1.1; 3.2.1.10	GH13
MGYG000005775_01406	food_porridge_pulp_adm	3.33178	9.90066e-10	0.000241197		3.2.1.4	GH5; GH9
MGYG000176701_00914	food_porridge_pulp_adm	1.27365	1.00457e-09	0.000243034		3.2.1.78	GH26
MGYG000000775_00390	food_animal_milk_adm	0.747102	1.02124e-09	0.000245127		3.2.1.4	GH5; GH9
MGYG000021864_00276	food_porridge_pulp_adm	1.52924	1.0225e-09	0.000245286		3.2.1.78	GH26
MGYG000216704_01532	food_animal_milk_adm	1.57553	1.04364e-09	0.000247915	nagZ2	3.2.1.52	GH20
MGYG000085380_01717	food_porridge_pulp_adm	3.82894	1.04453e-09	0.000248025		3.2.1.51	GH95
MGYG000097080_00146	food_porridge_pulp_adm	1.68589	1.08357e-09	0.000252812	apu	2.4.1.25	GH77
MGYG000231700_01676	food_porridge_pulp_adm	3.34834	1.08587e-09	0.000253092	malQ	2.4.1.25	GH77
MGYG000123934_00848	breast_feeding	3.92779	1.11346e-10	0.000253164		3.2.1.21	GH3
MGYG000009639_01311	food_gutthi_gripe_adm	2.57014	1.089e-09	0.000253471		2.4.1.187	GT26
MGYG000005863_01305	food_porridge_pulp_adm	2.42466	1.0904e-09	0.000253641		2.4.1.315	GT28
MGYG000162840_00784	food_porridge_pulp_adm	3.27914	1.09196e-09	0.000253829	glgP	2.4.1.1	GT35
MGYG000010750_01090	food_porridge_pulp_adm	2.63138	1.09823e-09	0.000254587		2.4.1.293	GT2
MGYG000076298_00948	food_formula_powder_milk_adm	0.742255	1.11521e-09	0.00025663	malQ	2.4.1.25	GH77
MGYG000069517_00762	food_porridge_pulp_adm	1.86806	1.11647e-09	0.00025678		2.4.1.10	GH68
MGYG000084323_00081	food_porridge_pulp_adm	1.99579	1.14708e-09	0.00026042	glgB	2.4.1.18	CBM48; GH13
MGYG000003252_02123	food_animal_milk_adm	1.28353	1.14832e-09	0.000260566		4.2.2.23	PL11
MGYG000256484_01108	food_animal_milk_adm	1.44851	1.16616e-09	0.000262665	glgP	2.4.1.1; 2.4.1.11; 2.4.1.8	GH65; GT3; GT35
MGYG000127583_00372	food_formula_powder_milk_adm	1.02468	1.16664e-09	0.000262722		2.4.1.129; 3.4.16.4	GT51
MGYG000188210_00039	food_porridge_pulp_adm	2.21533	1.16761e-09	0.000262835		3.2.1.18	GH33
MGYG000151540_00590	food_porridge_pulp_adm	3.44236	1.18205e-09	0.000264521	glgA	2.4.1.21	GT5
MGYG000000221_02642	food_sugar_water_adm	0.374484	1.19281e-09	0.00026577		3.2.1.52	GH20
MGYG000000545_00804	food_porridge_pulp_adm	1.75816	1.19703e-09	0.000266259	abgA	3.2.1.86	GT1
MGYG000156434_01146	food_porridge_pulp_adm	1.58262	1.19937e-09	0.000266529		2.4.1.291	GT4
MGYG000075037_00542	food_porridge_pulp_adm	3.45877	1.21721e-09	0.000268584		3.2.1.21	GH3
MGYG000107932_01393	food_gutthi_gripe_adm	3.44016	1.21779e-09	0.00026865		3.2.1.18	GH33
MGYG000114218_00748	food_porridge_pulp_adm	1.75039	1.21926e-09	0.000268819	celE	3.2.1.4	GH5; GH9
MGYG000269804_00347	food_porridge_pulp_adm	2.19692	1.22577e-09	0.000269563		2.4.1.291	GT4
MGYG000180975_01823	food_porridge_pulp_adm	2.33475	1.22647e-09	0.000269644		3.2.1.21	GH3
MGYG000257071_00385	food_animal_milk_adm	1.49919	1.22915e-09	0.000269949		3.2.1.177	GH31
MGYG000174977_00230	breast_feeding	3.91623	1.28309e-10	0.000270487		3.2.1.97	GH101
MGYG000001865_00561	food_porridge_pulp_adm	1.41954	1.24263e-09	0.000271484	glgA	2.4.1.21	GT5
MGYG000041807_01346	food_porridge_pulp_adm	3.24144	1.24772e-09	0.000272062	scrB	3.2.1.26	GH32
MGYG000122682_01354	food_formula_powder_milk_adm	0.716293	1.25355e-09	0.000272721		3.2.1.21	GH3
MGYG000028179_00083	food_porridge_pulp_adm	1.60548	1.25494e-09	0.000272879		3.2.1.20	GH31
MGYG000266479_02074	food_gutthi_gripe_adm	1.52486	1.26058e-09	0.000273515		3.2.1.51	GH29
MGYG000162570_00352	food_animal_milk_adm	1.82893	1.27514e-09	0.000275152		3.2.1.172	GH105
MGYG000132253_00555	food_gutthi_gripe_adm	0.82124	1.2977e-09	0.00027767	glgB	2.4.1.18	CBM48; GH13
MGYG000149747_01742	food_animal_milk_adm	1.68128	1.30448e-09	0.000278423		3.2.1.37; 3.2.1.51	GH29; GH43
MGYG000008175_00409	food_gutthi_gripe_adm	1.07879	1.31771e-09	0.000279885		3.2.1.180	GH88
MGYG000000269_01813	food_porridge_pulp_adm	2.60944	1.31874e-09	0.000279999		3.2.1.170	GH38
MGYG000106686_01469	breast_feeding	4.12108	1.38383e-10	0.000280173		3.2.1.55	GH51
MGYG000134754_00540	food_formula_powder_milk_adm	0.967683	1.34037e-09	0.000282374	glgP	2.4.1.1	GT35
MGYG000005775_01112	food_porridge_pulp_adm	3.327	1.35354e-09	0.000283811		3.2.1.4	GH5; GH9
MGYG000020985_01053	food_gutthi_gripe_adm	1.95183	1.36109e-09	0.000284631		3.2.1.4	GH5; GH9
MGYG000181683_01123	food_gutthi_gripe_adm	1.05955	1.3671e-09	0.000285283	glgB	2.4.1.18	CBM48; GH13
MGYG000005554_00418	breast_feeding	3.4131	1.46352e-10	0.000287561		3.2.1.21	GH3
MGYG000055448_02352	food_animal_milk_adm	0.889277	1.3957e-09	0.000288365	bglB	3.2.1.21	GH3
MGYG000058788_01240	food_formula_powder_milk_adm	0.692295	1.41114e-09	0.000290014		3.2.1.20	GH31
MGYG000184214_01026	food_porridge_pulp_adm	2.2064	1.42284e-09	0.000291259		2.4.1.129; 3.4.16.4	GT51
MGYG000084323_00541	food_porridge_pulp_adm	1.57775	1.45472e-09	0.000294625	mrcB	2.4.1.129; 3.4.16.4	GT51
MGYG000011009_01846	food_porridge_pulp_adm	7.66012	1.45645e-09	0.000294807		2.7.8.20	GT2
MGYG000277368_01179	food_porridge_pulp_adm	2.26826	1.46356e-09	0.000295552	murG	2.4.1.227	GT28
MGYG000122185_00253	food_porridge_pulp_adm	2.85107	1.46661e-09	0.000295871		3.2.1.4; 3.2.1.52	GH5; GH9
MGYG000270112_00356	food_animal_milk_adm	1.2816	1.4896e-09	0.000298266		3.2.1.51	GH95
MGYG000058448_00099	food_porridge_pulp_adm	8.00903	1.50476e-09	0.000299836		2.4.1.83	GT2
MGYG000036042_01347	food_porridge_pulp_adm	2.49067	1.50812e-09	0.000300182	tagA	2.4.1.187	GT26
MGYG000117795_00211	food_porridge_pulp_adm	1.30635	1.51957e-09	0.000301362	pbg9	3.2.1.86	GT1
MGYG000279396_01324	food_tea_adm	0.447785	1.51959e-09	0.000301363		3.2.1.156	GH8
MGYG000015284_01026	food_porridge_pulp_adm	2.02625	1.52025e-09	0.000301431	treA	3.2.1.28	GH37
MGYG000003361_00191	breast_feeding	3.67826	1.6262e-10	0.000301972		3.2.1.78	GH26
MGYG000023251_01202	food_porridge_pulp_adm	3.30816	1.52677e-09	0.000302101		3.2.1.4; 3.2.1.78	GH26; GH5; GH9
MGYG000032345_00767	food_porridge_pulp_adm	2.56745	1.53312e-09	0.00030275		2.4.1.173	GT1
MGYG000164660_01071	food_porridge_pulp_adm	3.22868	1.54311e-09	0.000303771		2.4.1.20	GT36
MGYG000003490_00157	food_animal_milk_adm	0.98975	1.56365e-09	0.000305858		2.4.1.20	GT36
MGYG000003805_01005	food_animal_milk_adm	0.910612	1.56541e-09	0.000306037	glgE	2.4.99.16	GH13
MGYG000137079_01468	breast_feeding	2.37097	1.70597e-10	0.000308745		3.2.1.51	GH29
MGYG000043109_02944	food_gutthi_gripe_adm	1.47307	1.65254e-09	0.00031474	xyl3A_3	3.2.1.21	GH3
MGYG000275285_00692	food_porridge_pulp_adm	4.83291	1.66119e-09	0.000315592		2.4.1.129; 3.4.16.4	GT51
MGYG000135421_02136	breast_feeding	3.41915	1.78973e-10	0.000315667		3.2.1.45	GH30
MGYG000225759_00408	food_animal_milk_adm	1.16201	1.66616e-09	0.000316079	gmhA	2.4.1.346	GT4
MGYG000013741_00222	food_porridge_pulp_adm	2.25357	1.67011e-09	0.000316467		3.2.1.1; 3.2.1.11; 3.2.1.78; 3.2.1.8; 3.2.1.80; 3.2.1.89	GH13; GH26; GH66
MGYG000009186_01063	food_porridge_pulp_adm	1.97728	1.6757e-09	0.000317014	ompC	2.4.1.10; 3.5.1.28	GH68
MGYG000088491_00923	food_animal_milk_adm	1.00717	1.67851e-09	0.000317289		3.2.1.24	GH38
MGYG000004712_01098	food_porridge_pulp_adm	2.11263	1.69361e-09	0.000318763		3.2.1.68	CBM48; GH13
MGYG000193824_00689	food_porridge_pulp_adm	3.60318	1.72738e-09	0.000322034	rsbW	2.4.1.12	GT2
MGYG000000523_00397	food_porridge_pulp_adm	2.59341	1.73235e-09	0.000322513		2.4.1.336	GT2
MGYG000103856_01584	food_animal_milk_adm	2.54034	1.7348e-09	0.000322749		2.4.1.187	GT26
MGYG000171333_00113	food_porridge_pulp_adm	1.8882	1.73929e-09	0.000323181		3.2.1.37	GH43
MGYG000063052_00021	food_gutthi_gripe_adm	0.692146	1.7844e-09	0.000327487		3.2.1.4	GH5; GH9
MGYG000050771_01115	food_porridge_pulp_adm	4.294	1.78583e-09	0.000327623	glgA	2.4.1.21	GT5
MGYG000004823_00836	food_porridge_pulp_adm	1.21285	1.81455e-09	0.000330335	glgP	2.4.1.1; 2.4.1.11; 2.4.1.8	GH65; GT3; GT35
MGYG000276947_04751	food_animal_milk_adm	1.78249	1.86392e-09	0.000334949		2.4.2.53	GT2
MGYG000017316_01086	food_porridge_pulp_adm	1.83359	1.87632e-09	0.000336097	nfrB	2.4.1.336	GT2
MGYG000030876_00504	food_porridge_pulp_adm	3.1577	1.87827e-09	0.000336278		3.2.1.4	GH5; GH9
MGYG000004860_00069	food_gutthi_gripe_adm	0.855998	1.92806e-09	0.000340852		2.4.1.12	GT2
MGYG000012064_01637	food_porridge_pulp_adm	4.77538	1.94986e-09	0.000342836	glgP	2.4.1.1	GT35
MGYG000120993_01251	food_porridge_pulp_adm	2.58742	1.95003e-09	0.000342851		2.4.1.10; 3.5.1.28	GH68
MGYG000058818_00907	food_tea_adm	0.681819	1.95296e-09	0.000343117	eglS	3.2.1.4	GH5; GH9
MGYG000167211_00452	food_porridge_pulp_adm	2.97782	1.95537e-09	0.000343336	pbpG	2.4.1.129; 3.4.16.4	GT51
MGYG000002497_03052	food_animal_milk_adm	3.17862	1.97185e-09	0.000344826	rffM	2.4.1.180	GT26
MGYG000104449_02756	food_formula_powder_milk_adm	0.568308	2.00656e-09	0.000347945		2.4.1.348	GT4
MGYG000247734_01166	food_animal_milk_adm	1.27394	2.00967e-09	0.000348223	glgA	2.4.1.21	GT5
MGYG000000908_01302	food_porridge_pulp_adm	5.22556	2.02746e-09	0.00034981	recX	2.4.1.337	GT4
MGYG000000176_04308	food_gutthi_gripe_adm	0.764664	2.03487e-09	0.000350469		3.2.1.21	GH3
MGYG000176129_00329	food_porridge_pulp_adm	2.312	2.05202e-09	0.000351989	bglB	3.2.1.21	GH3
MGYG000278934_02261	food_porridge_pulp_adm	2.27677	2.0919e-09	0.0003555		3.2.1.4	GH5; GH9
MGYG000202205_01126	food_porridge_pulp_adm	2.20558	2.1193e-09	0.000357894		2.4.1.315	GT28
MGYG000133443_01394	breast_feeding	1.90503	2.37315e-10	0.0003595		3.2.1.51	GH29
MGYG000041048_00721	food_animal_milk_adm	1.43373	2.13951e-09	0.000359649		2.4.1.348	GT4
MGYG000126764_02137	food_porridge_pulp_adm	3.39491	2.16181e-09	0.000361576		3.2.1.21	GH3
MGYG000002277_02749	food_porridge_pulp_adm	2.46167	2.19445e-09	0.000364379		3.2.1.4	GH5; GH9
MGYG000033414_00482	breast_feeding	2.19397	2.48321e-10	0.000367061		3.2.1.51	GH29
MGYG000285835_00887	food_porridge_pulp_adm	1.30653	2.22731e-09	0.00036718		3.2.1.4	GH5; GH9
MGYG000004214_00342	food_porridge_pulp_adm	2.15714	2.23845e-09	0.000368125	malZ	3.2.1.20; 3.2.1.41	CBM48; GH13; GH31
MGYG000135059_01958	food_sugar_water_adm	0.719422	2.24656e-09	0.000368811		3.2.1.45	GH116
MGYG000152896_00947	food_gutthi_gripe_adm	1.7104	2.25647e-09	0.000369648		3.2.1.86	GT1
MGYG000012214_01132	food_gutthi_gripe_adm	1.0469	2.26318e-09	0.000370214		3.2.1.4	GH5; GH9
MGYG000094325_00575	food_porridge_pulp_adm	1.47723	2.30125e-09	0.000373408		3.2.1.21	GH3
MGYG000263584_01828	food_porridge_pulp_adm	2.36785	2.317e-09	0.000374721		3.2.1.24	GH38
MGYG000061932_00839	food_tea_adm	0.411044	2.31726e-09	0.000374743		3.2.1.4	GH5; GH9
MGYG000000620_00525	breast_feeding	3.3086	2.60432e-10	0.000375165	ftsW	2.4.1.227	GT28
MGYG000030768_01756	food_porridge_pulp_adm	1.80732	2.34753e-09	0.000377254		3.2.1.11	GH66
MGYG000277787_01904	food_porridge_pulp_adm	1.0415	2.39212e-09	0.000380926		3.2.1.21	GH3
MGYG000002827_00445	food_animal_milk_adm	1.23533	2.43744e-09	0.000384622	mrcA	2.4.1.129; 3.4.16.4	GT51
MGYG000162427_00532	food_animal_milk_adm	1.307	2.45279e-09	0.000385866	glgP	2.4.1.1; 2.4.1.11; 2.4.1.8	GH65; GT3; GT35
MGYG000118246_00545	food_porridge_pulp_adm	1.97747	2.46992e-09	0.00038725		3.2.1.177; 3.2.1.52	GH31
MGYG000004884_00206	food_porridge_pulp_adm	2.95026	2.47923e-09	0.000388		2.4.1.20	GT36
MGYG000284910_00192	food_animal_milk_adm	1.20703	2.50272e-09	0.000389886	bglX	3.2.1.21	GH3
MGYG000107829_00445	food_porridge_pulp_adm	1.6334	2.52005e-09	0.000391272		3.2.1.18	GH33
MGYG000031344_02577	food_porridge_pulp_adm	1.30082	2.57701e-09	0.000395793		3.2.1.4	GH5; GH9
MGYG000018508_01247	food_animal_milk_adm	4.11532	2.58416e-09	0.000396357		3.2.1.26	GH32
MGYG000117553_00447	food_porridge_pulp_adm	1.73978	2.5993e-09	0.000397549		3.2.1.45	GH30
MGYG000074418_01785	food_animal_milk_adm	1.78901	2.61289e-09	0.000398616	neu	3.2.1.18	GH33
MGYG000096374_01762	food_animal_milk_adm	1.24213	2.66603e-09	0.00040276		2.4.1.348	GT4
MGYG000011056_00965	food_porridge_pulp_adm	2.38166	2.6779e-09	0.00040368		3.2.1.172	GH105
MGYG000160917_00570	food_porridge_pulp_adm	4.582	2.68147e-09	0.000403957		3.2.1.4	GH5; GH9
MGYG000208903_00262	food_porridge_pulp_adm	2.34729	2.68867e-09	0.000404514		3.2.1.18	GH33
MGYG000086349_01438	food_porridge_pulp_adm	3.0278	2.70034e-09	0.000405415	FbpA	3.1.21.3; 3.2.1.170	GH38
MGYG000126295_00628	food_porridge_pulp_adm	3.9022	2.71732e-09	0.000406722		2.4.1.187	GT26
MGYG000000515_02354	food_porridge_pulp_adm	1.79206	2.72162e-09	0.000407053	malL_2	3.2.1.1; 3.2.1.10	GH13
MGYG000044682_00053	food_formula_powder_milk_adm	0.588666	2.72717e-09	0.000407478	treA	3.2.1.28	GH37
MGYG000287806_01217	food_porridge_pulp_adm	3.3659	2.72888e-09	0.000407609		3.2.1.156	GH8
MGYG000240018_00409	food_porridge_pulp_adm	2.32197	2.76401e-09	0.000410295	malQ	2.4.1.25	GH77
MGYG000233192_01328	food_animal_milk_adm	1.89637	2.78073e-09	0.000411568		3.2.1.20	GH31
MGYG000120793_00682	food_gutthi_gripe_adm	0.756925	2.78996e-09	0.000412268	murG	2.4.1.227	GT28
MGYG000223759_01138	breast_feeding	3.25979	3.22142e-10	0.000413474		2.4.1.129; 3.4.16.4	GT51
MGYG000095587_02536	food_animal_milk_adm	1.43875	2.82031e-09	0.000414565	bcsA	2.4.1.12	GT2
MGYG000003463_00032	food_porridge_pulp_adm	1.42867	2.83351e-09	0.00041556		2.4.1.339; 2.4.1.340	GH130
MGYG000002168_01983	food_animal_milk_adm	0.912371	2.83748e-09	0.000415858	malQ	2.4.1.25	GH77
MGYG000089836_01486	food_animal_milk_adm	1.13527	2.83807e-09	0.000415903	gmuD	3.2.1.21; 3.2.1.85; 3.2.1.86	GT1
MGYG000084616_00055	food_animal_milk_adm	0.987524	2.90752e-09	0.000421094		3.2.1.26	GH32
MGYG000048622_00798	food_porridge_pulp_adm	3.57129	2.93237e-09	0.000422937	pulA	3.2.1.41	CBM48; GH13
MGYG000000626_00189	food_porridge_pulp_adm	3.95627	2.93812e-09	0.000423362		3.2.1.1; 3.2.1.10	GH13
MGYG000128950_00859	food_animal_milk_adm	2.26807	2.9391e-09	0.000423434		3.2.1.51	GH95
MGYG000000908_00950	food_porridge_pulp_adm	4.94213	2.93973e-09	0.000423481		3.2.1.86	GT1
MGYG000066218_00746	food_porridge_pulp_adm	3.07006	2.94129e-09	0.000423596		2.4.1.129; 3.4.16.4	GT51
MGYG000006087_00694	food_sugar_water_adm	0.699488	2.94513e-09	0.000423879	bglB_4	3.2.1.21	GH3
MGYG000000176_02633	food_gutthi_gripe_adm	1.60578	2.98495e-09	0.00042681		3.2.1.177	GH31
MGYG000001185_00097	food_porridge_pulp_adm	1.74331	2.98946e-09	0.00042714	glgP	2.4.1.1	GT35
MGYG000000908_00558	food_porridge_pulp_adm	5.12362	2.99021e-09	0.000427195	ponA	2.4.1.129; 3.4.16.4	GT51
MGYG000259726_01153	food_porridge_pulp_adm	1.77352	2.99193e-09	0.000427321		2.4.1.25	GH77
MGYG000048502_00128	food_porridge_pulp_adm	3.09012	3.01875e-09	0.000429281	malQ	2.4.1.25	GH77
MGYG000107504_01836	food_animal_milk_adm	1.16036	3.03048e-09	0.000430135	glgP	2.4.1.1; 2.4.1.11; 2.4.1.8	GH65; GT3; GT35
MGYG000000908_00783	food_porridge_pulp_adm	5.21873	3.03722e-09	0.000430625		3.2.1.177	GH31
MGYG000001989_00425	food_porridge_pulp_adm	2.92428	3.04416e-09	0.00043113	amyS	3.2.1.1	GH13
MGYG000101337_00989	food_porridge_pulp_adm	2.03482	3.04902e-09	0.000431483		2.4.1.315	GT28
MGYG000266811_00941	food_animal_milk_adm	1.0863	3.09018e-09	0.000434459	yicI	3.2.1.177; 3.2.1.199	GH31
MGYG000066429_00310	food_gutthi_gripe_adm	1.56494	3.11761e-09	0.000436431	tagA	2.4.1.187	GT26
MGYG000003215_00536	food_porridge_pulp_adm	3.93219	3.12799e-09	0.000437175		2.4.1.21	GT5
MGYG000116441_00353	food_porridge_pulp_adm	2.21192	3.22941e-09	0.00044438		3.2.1.78	GH26
MGYG000004850_00354	food_porridge_pulp_adm	2.23361	3.24101e-09	0.000445197		3.2.1.24	GH38
MGYG000240643_01091	food_porridge_pulp_adm	2.02979	3.24797e-09	0.000445687		2.4.1.230; 2.4.1.282	GH65
MGYG000020942_02039	food_porridge_pulp_adm	1.81593	3.28166e-09	0.000448049		3.2.1.4	GH5; GH9
MGYG000108088_00633	food_porridge_pulp_adm	5.67271	3.29832e-09	0.000449212	glgB	2.4.1.18	CBM48; GH13
MGYG000152671_00227	food_porridge_pulp_adm	4.99955	3.33381e-09	0.00045168		3.2.1.21	GH3
MGYG000238133_01551	food_animal_milk_adm	1.18959	3.33702e-09	0.000451903		3.2.1.156	GH8
MGYG000102321_01950	food_porridge_pulp_adm	2.10746	3.33835e-09	0.000451995	pulA	3.2.1.41	CBM48; GH13
MGYG000069550_01639	food_gutthi_gripe_adm	1.36518	3.36511e-09	0.000453846		3.2.1.78	GH26
MGYG000004897_01080	food_porridge_pulp_adm	4.57785	3.36829e-09	0.000454065	glgA	2.4.1.21	GT5
MGYG000038474_00931	food_porridge_pulp_adm	3.25305	3.40314e-09	0.000456464		3.2.1.4	GH5; GH9
MGYG000006733_02422	food_gutthi_gripe_adm	0.773145	3.43318e-09	0.000458521	glgP	2.4.1.1; 2.4.1.11; 2.4.1.8	GH65; GT3; GT35
MGYG000103085_00130	food_porridge_pulp_adm	3.97567	3.43719e-09	0.000458795		3.2.1.172	GH105
MGYG000226380_00027	food_porridge_pulp_adm	2.00717	3.46571e-09	0.00046074		3.2.1.99	GH43
MGYG000002801_00449	breast_feeding	3.2721	4.16162e-10	0.000464544		3.2.1.51	GH29
MGYG000062170_01118	food_porridge_pulp_adm	3.16168	3.52608e-09	0.000464828	malQ	2.4.1.25	GH77
MGYG000188236_00427	food_porridge_pulp_adm	2.24227	3.53159e-09	0.0004652		2.4.1.337	GT4
MGYG000133360_00356	food_porridge_pulp_adm	3.42844	3.54421e-09	0.000466049	glgB	2.4.1.18	CBM48; GH13
MGYG000276928_04231	food_animal_milk_adm	1.30084	3.54998e-09	0.000466437	glgA	2.4.1.21	GT5
MGYG000033660_00349	food_porridge_pulp_adm	6.02664	3.57793e-09	0.000468311		3.2.1.1	GH13
MGYG000004086_00170	food_porridge_pulp_adm	2.06299	3.59098e-09	0.000469184		3.2.1.52	GH20
MGYG000048435_00282	food_porridge_pulp_adm	3.73684	3.62034e-09	0.000471142		3.2.1.78	GH26
MGYG000000908_00200	food_porridge_pulp_adm	5.25108	3.64373e-09	0.000472695	bglA	3.2.1.86	GT1
MGYG000179826_01441	food_animal_milk_adm	1.18808	3.68472e-09	0.000475407	murG	2.4.1.227	GT28
MGYG000287913_00045	food_porridge_pulp_adm	2.48377	3.71544e-09	0.000477428	glgB	2.4.1.18	CBM48; GH13
MGYG000011006_01440	food_porridge_pulp_adm	3.4116	3.71715e-09	0.000477541		3.2.1.78	GH26
MGYG000196759_00157	food_porridge_pulp_adm	3.14714	3.71744e-09	0.00047756		4.2.2.5	PL8
MGYG000149220_04186	food_animal_milk_adm	1.83835	3.74193e-09	0.000479165	gtfB	2.4.1.5	GH13
MGYG000242499_00786	food_formula_powder_milk_adm	0.550548	3.76476e-09	0.000480657		4.2.2.1	PL8
MGYG000161952_00299	food_porridge_pulp_adm	1.94766	3.78819e-09	0.000482183		2.4.1.180; 2.4.1.187	GT26
MGYG000003615_01780	food_porridge_pulp_adm	1.3145	3.8388e-09	0.000485464		2.4.1.25	GH77
MGYG000019704_02087	food_porridge_pulp_adm	2.26207	3.8461e-09	0.000485935		2.4.1.315	GT28
MGYG000006727_00421	food_porridge_pulp_adm	3.43877	3.86884e-09	0.0004874	abfA	3.2.1.55	GH51
MGYG000012110_01777	breast_feeding	3.41099	4.70913e-10	0.000491284		3.2.1.20	GH31
MGYG000022325_01991	food_porridge_pulp_adm	1.94416	4.0153e-09	0.000496737		3.2.1.18	GH33
MGYG000191253_00457	food_porridge_pulp_adm	3.14428	4.0348e-09	0.000497967	celA2	3.2.1.4	GH5; GH9
MGYG000278830_00176	food_animal_milk_adm	1.1476	4.05246e-09	0.000499078		3.2.1.37	GH43
MGYG000266479_00528	food_gutthi_gripe_adm	1.05678	4.07566e-09	0.000500534	murG	2.4.1.227	GT28
MGYG000000523_01581	food_porridge_pulp_adm	2.53314	4.1134e-09	0.000502895		2.4.1.58	GT8
MGYG000218891_01539	food_formula_powder_milk_adm	0.540756	4.12681e-09	0.00050373	pulA	3.2.1.41	CBM48; GH13
MGYG000104449_02765	food_formula_powder_milk_adm	0.497591	4.14001e-09	0.000504552		2.4.2.26	GT14
MGYG000159414_00067	food_gutthi_gripe_adm	0.733453	4.17371e-09	0.000506643	bglX	3.2.1.21	GH3
MGYG000000908_00003	food_porridge_pulp_adm	4.80646	4.25812e-09	0.000511844	celC	3.2.1.4	GH5; GH9
MGYG000131483_00114	food_porridge_pulp_adm	2.31014	4.29807e-09	0.000514288		2.4.1.10; 3.5.1.28	GH68
MGYG000071293_01125	food_porridge_pulp_adm	2.99775	4.35362e-09	0.000517667	glgA	2.4.1.21	GT5
MGYG000029355_00528	food_animal_milk_adm	1.23788	4.36945e-09	0.000518625		3.2.1.133; 3.2.1.135; 3.2.1.54; 3.5.4.33	GH13
MGYG000000908_00799	food_porridge_pulp_adm	4.82681	4.37412e-09	0.000518908		3.2.1.97; 4.2.2.1	GH101; PL8
MGYG000131655_00562	food_porridge_pulp_adm	3.14312	4.4324e-09	0.000522421		3.2.1.4	GH5; GH9
MGYG000027664_00966	food_animal_milk_adm	1.78885	4.44549e-09	0.000523207	malL	3.2.1.1; 3.2.1.10	GH13
MGYG000006231_01378	food_gutthi_gripe_adm	1.57338	4.51867e-09	0.000527579		2.4.1.52	GT4
MGYG000003393_01325	food_animal_milk_adm	0.89169	4.52206e-09	0.000527781	malP	2.4.1.1	GT35
MGYG000005434_00281	food_porridge_pulp_adm	2.08946	4.52448e-09	0.000527924		4.1.1.105; 4.1.1.28	GH23
MGYG000023251_00677	food_porridge_pulp_adm	3.28206	4.57184e-09	0.000530732		3.2.1.176; 3.2.1.4	GH48; GH5; GH9
MGYG000005338_00955	food_animal_milk_adm	2.15832	4.60524e-09	0.000532705	xylB	3.2.1.37; 3.2.1.55	GH43; GH51
MGYG000100981_01369	food_porridge_pulp_adm	2.38258	4.61654e-09	0.00053337		2.4.2.53	GT2
MGYG000280719_00029	food_porridge_pulp_adm	2.53912	4.62729e-09	0.000534002		3.2.1.21	GH3
MGYG000285261_00523	food_porridge_pulp_adm	2.21962	4.64216e-09	0.000534876		2.4.1.109	GT39
MGYG000121750_00616	food_animal_milk_adm	0.928235	4.65445e-09	0.000535597	lacZ	3.2.1.23; 3.2.1.52	GH20
MGYG000249575_01068	food_porridge_pulp_adm	2.05462	4.68643e-09	0.000537468		3.2.1.86	GT1
MGYG000078806_01570	food_animal_milk_adm	1.43685	4.7031e-09	0.00053844	celF	3.2.1.86	GT4
MGYG000179435_01275	food_gutthi_gripe_adm	2.52485	4.70373e-09	0.000538477		3.2.1.86	GT1
MGYG000237482_00175	food_porridge_pulp_adm	1.62301	4.72104e-09	0.000539485		3.2.1.4	GH5; GH9
MGYG000008559_01496	food_gutthi_gripe_adm	1.52951	4.72933e-09	0.000539967		1.14.99.53	AA10
MGYG000154262_01855	food_gutthi_gripe_adm	1.56759	4.72999e-09	0.000540006	tagE	2.4.1.52	GT4
MGYG000071905_00002	food_porridge_pulp_adm	4.69748	4.73157e-09	0.000540097		3.2.1.78	GH26
MGYG000037664_02619	food_porridge_pulp_adm	3.90787	4.74512e-09	0.000540884		2.4.1.10; 3.5.1.28	GH68
MGYG000005204_00584	food_gutthi_gripe_adm	0.772347	4.75356e-09	0.000541374		2.3.1.204; 3.2.1.170; 3.2.1.24	GH38
MGYG000003115_00160	food_gutthi_gripe_adm	0.84565	4.76322e-09	0.000541934		2.4.1.15; 2.4.1.347	GT20
MGYG000008559_00069	food_gutthi_gripe_adm	1.5549	4.79181e-09	0.000543588	pbp2A	2.4.1.129; 3.4.16.4	GT51
MGYG000001480_01549	food_animal_milk_adm	1.01623	4.80124e-09	0.000544132	glgE	2.4.99.16	GH13
MGYG000235704_00335	food_gutthi_gripe_adm	0.953433	4.81108e-09	0.0005447		3.2.1.45	GH30
MGYG000211784_00031	food_porridge_pulp_adm	2.16498	4.89084e-09	0.000549278		3.2.1.97	GH101
MGYG000026219_00457	food_porridge_pulp_adm	2.1672	4.89572e-09	0.000549557	murG	2.4.1.227	GT28
MGYG000020942_00656	food_porridge_pulp_adm	2.14506	4.95464e-09	0.000552912		3.2.1.51	GH29
MGYG000071877_00170	food_porridge_pulp_adm	3.42193	4.98684e-09	0.000554738		2.4.1.329; 2.4.1.7	GH13
MGYG000184836_02041	food_porridge_pulp_adm	3.57332	5.04237e-09	0.000557872		2.4.1.129; 3.4.16.4	GT51
MGYG000245464_00150	breast_feeding	3.26862	6.24733e-10	0.000558034	glgP	2.4.1.1	GT35
MGYG000087342_02205	food_gutthi_gripe_adm	1.46046	5.05972e-09	0.000558847	amyA2	3.2.1.1	GH13
MGYG000173225_00551	food_porridge_pulp_adm	1.96319	5.06828e-09	0.000559328		2.4.1.109	GT39
MGYG000000523_00425	food_porridge_pulp_adm	2.50377	5.08504e-09	0.000560268		3.2.1.1	GH13
MGYG000020985_01052	food_gutthi_gripe_adm	1.87842	5.10799e-09	0.000561553		3.2.1.21	GH3
MGYG000139530_00488	food_porridge_pulp_adm	2.97858	5.12171e-09	0.000562319		3.2.1.82	GH28
MGYG000004365_01995	food_formula_powder_milk_adm	0.612696	5.16841e-09	0.000564921		3.2.1.55	GH51
MGYG000269735_00512	breast_feeding	3.70254	6.48552e-10	0.00056749	bgl2	3.2.1.21	GH3
MGYG000001368_02770	food_formula_powder_milk_adm	0.485392	5.29585e-09	0.000571961		3.2.1.51	GH95
MGYG000009423_00552	food_porridge_pulp_adm	3.19258	5.34943e-09	0.000574895	murG	2.4.1.227	GT28
MGYG000004609_01094	food_animal_milk_adm	1.19257	5.42699e-09	0.000579116		3.2.1.68	CBM48; GH13
MGYG000275111_01309	food_porridge_pulp_adm	3.53683	5.44706e-09	0.000580203	malP	2.4.1.1	GT35
MGYG000089548_00317	breast_feeding	3.86734	6.83604e-10	0.00058105		3.2.1.99	GH43
MGYG000000626_01202	food_porridge_pulp_adm	4.29504	5.60953e-09	0.000588931		3.2.1.133; 3.2.1.135; 3.2.1.54; 3.5.4.33	GH13
MGYG000002094_00174	food_porridge_pulp_adm	1.88565	5.61906e-09	0.000589438	glgP	2.4.1.1	GT35
MGYG000165016_00348	food_porridge_pulp_adm	3.2863	5.66972e-09	0.000592131	tagA	2.4.1.187	GT26
MGYG000092925_00135	food_porridge_pulp_adm	3.51652	5.7087e-09	0.000594195		3.2.1.51	GH29
MGYG000164451_00313	food_porridge_pulp_adm	2.37006	5.72046e-09	0.000594816		3.2.1.20	GH31
MGYG000173670_00072	food_porridge_pulp_adm	3.3202	5.72211e-09	0.000594903		3.2.1.20	GH31
MGYG000006231_01671	food_gutthi_gripe_adm	1.5444	5.72374e-09	0.000594989	bglH	3.2.1.86	GT1
MGYG000003858_01060	food_porridge_pulp_adm	1.72213	5.83693e-09	0.000600933		3.2.1.4	GH5; GH9
MGYG000000626_00444	food_porridge_pulp_adm	4.50664	5.84766e-09	0.000601494		2.4.1.129; 3.4.16.4	GT51
MGYG000229929_01103	food_porridge_pulp_adm	3.48596	5.96641e-09	0.000607662	hylB	4.2.2.1	PL8
MGYG000004884_01880	food_porridge_pulp_adm	2.84311	5.99418e-09	0.000609095		3.2.1.172	GH105
MGYG000088362_00509	food_porridge_pulp_adm	3.18972	6.00807e-09	0.000609811		3.2.1.37; 3.2.1.55	GH43; GH51
MGYG000223759_01303	breast_feeding	3.2743	7.65043e-10	0.000611086		3.2.1.41	CBM48; GH13
MGYG000247219_01627	food_animal_milk_adm	1.97283	6.0772e-09	0.00061336		3.2.1.78	GH26
MGYG000012973_00473	food_porridge_pulp_adm	2.52333	6.07874e-09	0.000613439	spoIID	3.5.1.28	CBM50
MGYG000280088_01416	food_animal_milk_adm	1.35135	6.10087e-09	0.00061457	celA	3.2.1.4	GH5; GH9
MGYG000024996_01635	breast_feeding	3.73419	7.81517e-10	0.000616935	glgB	2.4.1.18	CBM48; GH13
MGYG000182806_01426	food_porridge_pulp_adm	1.59946	6.15282e-09	0.000617219	murG	2.4.1.227	GT28
MGYG000071359_01494	food_porridge_pulp_adm	3.15993	6.22166e-09	0.000620711		3.2.1.20	GH31
MGYG000135852_01982	food_porridge_pulp_adm	3.8044	6.28473e-09	0.000623894	glgB	2.4.1.18	CBM48; GH13
MGYG000003215_01028	food_porridge_pulp_adm	4.99965	6.33122e-09	0.000626229	malP_1	2.4.1.1	GT35
MGYG000198278_02313	food_gutthi_gripe_adm	0.837402	6.33527e-09	0.000626432		2.4.1.152; 2.4.1.65	GT10
MGYG000001314_02617	food_porridge_pulp_adm	2.48498	6.4509e-09	0.000632201	glgB	2.4.1.18	CBM48; GH13
MGYG000009688_01111	breast_feeding	3.80735	8.27074e-10	0.00063275	gtfA	2.4.1.7	GH13
MGYG000190413_03821	food_gutthi_gripe_adm	2.55414	6.50302e-09	0.000634784		3.2.1.51	GH29
MGYG000071051_00526	food_animal_milk_adm	0.887984	6.5879e-09	0.000638969		3.2.1.51	GH95
MGYG000058726_00906	food_tea_adm	0.883473	6.6144e-09	0.00064027		3.2.1.41	CBM48; GH13
MGYG000267662_01690	food_porridge_pulp_adm	2.32511	6.6742e-09	0.000643196		3.2.1.78	GH26
MGYG000045091_02407	food_porridge_pulp_adm	5.5876	6.70327e-09	0.000644613		3.2.1.21	GH3
MGYG000004689_00333	food_porridge_pulp_adm	4.37625	6.74412e-09	0.000646599	tagA	2.4.1.187	GT26
MGYG000003804_00300	food_animal_milk_adm	1.50369	6.7563e-09	0.00064719	bglX	3.2.1.21	GH3
MGYG000255704_08935	food_animal_milk_adm	1.53242	6.81304e-09	0.000649937		3.2.1.1	GH13
MGYG000264589_00157	food_animal_milk_adm	1.10621	6.82472e-09	0.000650501		4.2.2.23	PL11
MGYG000188764_01087	food_porridge_pulp_adm	2.25159	6.82623e-09	0.000650574		3.2.1.18	GH33
MGYG000166397_00450	food_porridge_pulp_adm	2.36212	6.84283e-09	0.000651374		2.4.1.348	GT4
MGYG000286987_00719	food_gutthi_gripe_adm	1.44733	6.86122e-09	0.00065226	murG	2.4.1.227	GT28
MGYG000005566_00158	food_formula_powder_milk_adm	0.564411	6.86511e-09	0.000652447	murG	2.4.1.227	GT28
MGYG000144080_01381	food_formula_powder_milk_adm	0.493102	6.86961e-09	0.000652664		3.2.1.55	GH51
MGYG000015951_00823	food_gutthi_gripe_adm	1.24977	6.88091e-09	0.000653207		2.4.1.129; 3.4.16.4	GT51
MGYG000264682_01058	food_gutthi_gripe_adm	0.876555	6.89045e-09	0.000653665		3.2.1.177	GH31
MGYG000286523_02594	food_animal_milk_adm	1.07053	7.06876e-09	0.000662173	bglB	3.2.1.21	GH3
MGYG000281213_00621	food_porridge_pulp_adm	1.58264	7.18701e-09	0.000667755	glgA	2.4.1.21	GT5
MGYG000000176_03765	food_gutthi_gripe_adm	0.905325	7.18851e-09	0.000667826		3.2.1.177	GH31
MGYG000239728_01749	food_animal_milk_adm	0.938741	7.2373e-09	0.000670115	glgP	2.4.1.1	GT35
MGYG000001218_02224	food_animal_milk_adm	1.04326	7.2465e-09	0.000670546	murG	2.4.1.227	GT28
MGYG000030609_00824	food_porridge_pulp_adm	2.57499	7.33607e-09	0.000674725		2.4.1.129; 3.4.16.4	GT51
MGYG000148102_00700	food_porridge_pulp_adm	1.68735	7.37433e-09	0.000676503		2.4.1.291	GT4
MGYG000000325_00122	food_porridge_pulp_adm	4.20178	7.4534e-09	0.000680161		2.4.1.315	GT28
MGYG000092294_00632	food_animal_milk_adm	0.987537	7.53821e-09	0.000684063		2.4.1.129; 3.4.16.4	GT51
MGYG000002003_00148	food_formula_powder_milk_adm	0.552469	7.57452e-09	0.000685727	pbpC	2.4.1.129	GT51
MGYG000059001_01211	food_porridge_pulp_adm	4.21219	7.61594e-09	0.00068762	glgX	3.2.1.68	CBM48; GH13
MGYG000069901_00965	food_porridge_pulp_adm	2.36616	7.7371e-09	0.000693127		3.2.1.4	GH5; GH9
MGYG000059002_00196	food_formula_powder_milk_adm	0.549959	7.73783e-09	0.00069316		2.4.1.122	GT2
MGYG000127715_00579	food_porridge_pulp_adm	1.41814	7.75506e-09	0.000693939	bglB	3.2.1.21	GH3
MGYG000230483_01539	food_porridge_pulp_adm	1.63254	7.7656e-09	0.000694416		3.2.1.18	GH33
MGYG000177336_00985	food_porridge_pulp_adm	4.08142	7.79327e-09	0.000695665	glgB	2.4.1.18	CBM48; GH13
MGYG000148101_01642	breast_feeding	3.14674	1.02848e-09	0.000697246	malQ	2.4.1.25	GH77
MGYG000124263_00751	food_porridge_pulp_adm	2.13289	7.83634e-09	0.000697605	bbmA	3.2.1.133; 3.2.1.135; 3.2.1.54	GH13
MGYG000099037_01006	food_porridge_pulp_adm	1.79013	7.83966e-09	0.000697754		3.2.1.156	GH8
MGYG000227392_00432	food_porridge_pulp_adm	2.19947	7.84689e-09	0.000698079		3.2.1.18	GH33
MGYG000071359_01165	food_porridge_pulp_adm	3.34428	7.92159e-09	0.000701429		2.4.1.348	GT4
MGYG000194517_01216	food_porridge_pulp_adm	2.31417	7.93531e-09	0.000702042		3.2.1.1	GH13
MGYG000096272_00955	food_gutthi_gripe_adm	1.56303	7.94576e-09	0.000702509		3.2.1.51	GH29
MGYG000194106_01052	food_formula_powder_milk_adm	1.13198	7.99549e-09	0.000704726		3.2.1.1; 3.2.1.41	CBM48; GH13
MGYG000241675_00326	food_porridge_pulp_adm	2.33727	8.0963e-09	0.0007092	pbpG	2.4.1.129; 3.4.16.4	GT51
MGYG000005375_00255	food_porridge_pulp_adm	2.04389	8.11572e-09	0.000710058		3.2.1.177	GH31
MGYG000046661_01456	food_porridge_pulp_adm	1.65997	8.20675e-09	0.000714069	otsB2	3.1.3.12; 3.2.1.28	GH37
MGYG000201457_00430	food_animal_milk_adm	1.3921	8.22439e-09	0.000714843		3.2.1.4	GH5; GH9
MGYG000130764_01763	food_porridge_pulp_adm	2.41266	8.23168e-09	0.000715163	vpr	3.2.1.4; 3.2.1.8; 3.2.1.81; 3.2.1.82; 3.4.21.96	GH28; GH5; GH9
MGYG000221476_01933	food_porridge_pulp_adm	1.92868	8.32755e-09	0.000719356		3.2.1.11	GH66
MGYG000223759_01970	breast_feeding	3.22264	1.12527e-09	0.000725642		3.2.1.166	GH79
MGYG000020985_01053	food_animal_milk_adm	2.13584	8.50031e-09	0.000726849		3.2.1.4	GH5; GH9
MGYG000155988_01793	food_gutthi_gripe_adm	1.52597	8.67974e-09	0.00073455	pimB	2.4.1.337	GT4
MGYG000185930_00586	food_porridge_pulp_adm	2.81572	8.72518e-09	0.000736487	murG	2.4.1.227	GT28
MGYG000018055_01742	food_porridge_pulp_adm	2.82925	8.79051e-09	0.000739263		2.4.1.83	GT2
MGYG000002196_00856	food_gutthi_gripe_adm	0.671761	8.96906e-09	0.000746797		2.4.1.337	GT4
MGYG000020143_01455	food_animal_milk_adm	1.47974	8.97695e-09	0.000747129		3.2.1.180	GH88
MGYG000256138_01002	food_formula_powder_milk_adm	0.44102	9.02643e-09	0.000749202	glgP	2.4.1.1	GT35
MGYG000179826_01086	food_formula_powder_milk_adm	0.470346	9.14523e-09	0.000754156		3.2.1.52	GH20
MGYG000214282_01531	food_formula_powder_milk_adm	0.470296	9.15121e-09	0.000754405	bglB_4	3.2.1.21	GH3
MGYG000194913_01350	food_porridge_pulp_adm	1.77508	9.26066e-09	0.000758939		2.4.1.129; 3.4.16.4	GT51
MGYG000026489_01935	food_porridge_pulp_adm	2.14977	9.35141e-09	0.000762677		3.2.1.4; 4.2.2.10	GH5; GH9
MGYG000004884_02024	food_porridge_pulp_adm	2.73576	9.41955e-09	0.000765472		2.4.1.315	GT28
MGYG000113973_00333	food_porridge_pulp_adm	2.70269	9.47074e-09	0.000767565		2.4.1.4; 3.2.1.1; 5.4.99.16	GH13
MGYG000060971_00828	food_animal_milk_adm	1.82634	9.62196e-09	0.000773714	tagA	2.4.1.187	GT26
MGYG000104007_01362	food_animal_milk_adm	1.76288	9.67336e-09	0.000775792		3.2.1.1	GH13
MGYG000009423_00095	food_porridge_pulp_adm	3.38656	9.86265e-09	0.0007834	apu	2.4.1.25; 3.2.1.133; 3.2.1.135; 3.2.1.20; 3.2.1.54	GH13; GH31; GH77
MGYG000150070_01171	food_porridge_pulp_adm	5.84523	9.89961e-09	0.000784876	malQ	2.4.1.25	GH77
MGYG000120604_00136	food_porridge_pulp_adm	2.19334	9.913e-09	0.00078541		3.2.1.1	GH13
MGYG000220244_00993	food_porridge_pulp_adm	1.60203	9.97018e-09	0.000787688	amyA2	3.2.1.1	GH13
MGYG000274605_01262	food_porridge_pulp_adm	2.29265	9.99898e-09	0.000788832		2.4.1.315	GT28
MGYG000194108_01111	food_gutthi_gripe_adm	0.844437	1.01936e-08	0.000796522		3.2.1.14	GH18
MGYG000254720_00660	food_porridge_pulp_adm	2.73286	1.02308e-08	0.000797985		3.2.1.4	GH5; GH9
MGYG000116330_01453	food_animal_milk_adm	2.16517	1.02928e-08	0.000800412		3.2.1.21	GH3
MGYG000222313_01147	food_animal_milk_adm	1.13991	1.03345e-08	0.000802041		3.2.1.52	GH20
MGYG000090286_00419	food_animal_milk_adm	2.55785	1.04779e-08	0.00080762		3.2.1.21	GH3
MGYG000104139_00537	food_gutthi_gripe_adm	1.53886	1.05414e-08	0.000810081		3.2.1.18	GH33
MGYG000125484_01531	food_animal_milk_adm	0.855391	1.06418e-08	0.000813948	glgA	2.4.1.21	GT5
MGYG000039302_02298	food_animal_milk_adm	1.76494	1.09525e-08	0.000825813		2.4.1.187	GT26
MGYG000120963_01042	food_animal_milk_adm	2.26318	1.09762e-08	0.000826711		3.2.1.1	GH13
MGYG000002265_00171	food_porridge_pulp_adm	2.87947	1.10473e-08	0.000829396	pbpG	2.4.1.129; 3.4.16.4	GT51
MGYG000277997_01068	food_gutthi_gripe_adm	1.3	1.10641e-08	0.000830029	nanH	3.2.1.18	GH33
MGYG000011619_00820	food_porridge_pulp_adm	5.56393	1.12603e-08	0.000837392	amyS	3.2.1.1	GH13
MGYG000110880_02676	food_porridge_pulp_adm	2.60404	1.12991e-08	0.00083884		3.2.1.1	GH13
MGYG000257619_01394	food_porridge_pulp_adm	2.99029	1.13266e-08	0.000839866	glgB	2.4.1.18	CBM48; GH13
MGYG000073698_00644	food_porridge_pulp_adm	3.89531	1.13694e-08	0.00084146	nagH	3.2.1.52	GH20
MGYG000099858_01874	food_porridge_pulp_adm	1.98171	1.14785e-08	0.000845507		2.4.1.348	GT4
MGYG000027440_00121	food_porridge_pulp_adm	2.20771	1.15726e-08	0.00084898		2.4.1.315	GT28
MGYG000004172_02240	food_gutthi_gripe_adm	0.775361	1.16796e-08	0.000852911		2.4.1.180	GT26
MGYG000000176_05256	food_gutthi_gripe_adm	0.792108	1.17915e-08	0.000857006		3.2.1.21; 3.2.1.86	GT1
MGYG000078794_03704	food_formula_powder_milk_adm	0.805288	1.18164e-08	0.000857912		3.2.1.21	GH3
MGYG000063603_01639	food_porridge_pulp_adm	4.47228	1.19926e-08	0.00086431		3.2.1.4	GH5; GH9
MGYG000195488_00594	food_porridge_pulp_adm	2.41862	1.20634e-08	0.000866867	glgP	2.4.1.1	GT35
MGYG000151188_03292	food_animal_milk_adm	1.56456	1.22537e-08	0.000873702	lpxB	2.4.1.182	GT19
MGYG000110694_01804	food_porridge_pulp_adm	2.08646	1.2351e-08	0.000877177	malL	3.2.1.1; 3.2.1.10; 3.2.1.70; 3.2.1.93	GH13
MGYG000002277_00685	food_porridge_pulp_adm	2.29302	1.24034e-08	0.000879042		4.2.2.5	PL8
MGYG000202347_01133	food_porridge_pulp_adm	1.3	1.24768e-08	0.000881646		3.2.1.18	GH33
MGYG000147442_00866	breast_feeding	3.03548	1.75169e-09	0.000882113	nplT	3.2.1.1	GH13
MGYG000001095_01495	food_sugar_water_adm	0.749242	1.26159e-08	0.000886562	glgP	2.4.1.1; 2.4.1.11; 2.4.1.8	GH65; GT3; GT35
MGYG000003578_00954	food_gutthi_gripe_adm	0.703333	1.26445e-08	0.000887571		2.4.1.291	GT4
MGYG000097540_02396	food_tea_adm	1.04999	1.26921e-08	0.000889246	bglB	3.2.1.21	GH3
MGYG000059415_03673	food_animal_milk_adm	2.18378	1.2719e-08	0.000890191		3.2.1.20	GH31
MGYG000202059_00164	food_animal_milk_adm	0.791925	1.2721e-08	0.000890258		3.1.3.5; 3.1.3.6; 3.1.4.16; 3.2.1.51; 3.6.1.45	GH29
MGYG000056036_00304	food_formula_powder_milk_adm	0.446623	1.27653e-08	0.000891813		3.2.1.21	GH3
MGYG000106864_01802	food_porridge_pulp_adm	3.70087	1.28433e-08	0.00089454		3.2.1.177	GH31
MGYG000031033_00104	food_porridge_pulp_adm	3.34513	1.28958e-08	0.000896373	murG	2.4.1.227	GT28
MGYG000259652_01191	breast_feeding	3.77808	1.81838e-09	0.000896699		3.2.1.24	GH38
MGYG000263092_03451	food_formula_powder_milk_adm	0.426719	1.29792e-08	0.000899275	nplT	3.2.1.133; 3.2.1.135; 3.2.1.54	GH13
MGYG000100331_02467	food_animal_milk_adm	2.32834	1.30366e-08	0.000901266		3.2.1.51	GH95
MGYG000116916_00600	food_porridge_pulp_adm	3.9028	1.30459e-08	0.000901588		3.2.1.55	CBM6; GH43
MGYG000026857_00003	food_porridge_pulp_adm	3.77237	1.30756e-08	0.000902613		2.4.1.83	GT2
MGYG000150964_00458	food_animal_milk_adm	1.28179	1.33027e-08	0.000910438		2.4.1.18	GH57
MGYG000125312_00092	food_porridge_pulp_adm	3.62659	1.34213e-08	0.000914495		3.2.1.51	GH29
MGYG000280210_01667	food_porridge_pulp_adm	1.53357	1.34881e-08	0.000916772		3.2.1.4	GH5; GH9
MGYG000005136_00771	food_porridge_pulp_adm	1.7002	1.35104e-08	0.000917532		3.2.1.20	GH31
MGYG000237314_00691	food_porridge_pulp_adm	1.41178	1.35213e-08	0.000917902	bclA	2.7.7.7; 3.2.1.4; 5.4.99.22	GH5; GH9
MGYG000002537_01061	food_animal_milk_adm	1.37871	1.36902e-08	0.00092363		2.4.1.337	GT4
MGYG000236527_00150	food_porridge_pulp_adm	1.41248	1.37941e-08	0.000927133		3.2.1.51	GH95
MGYG000015579_01259	food_porridge_pulp_adm	1.70159	1.37981e-08	0.000927268		3.2.1.1; 3.2.1.11; 3.2.1.78; 3.2.1.8; 3.2.1.80; 3.2.1.89	GH13; GH26; GH66
MGYG000004932_00510	food_porridge_pulp_adm	1.60367	1.38237e-08	0.000928128		3.2.1.99	GH43
MGYG000108320_01009	food_formula_powder_milk_adm	0.422573	1.3967e-08	0.000932935		2.4.1.187	GT26
MGYG000003368_01706	food_formula_powder_milk_adm	0.422451	1.39976e-08	0.000933957	pulA	3.2.1.41	CBM48; GH13
MGYG000194409_00176	food_porridge_pulp_adm	2.3799	1.40618e-08	0.0009361		3.2.1.177	GH31
MGYG000087143_02333	food_gutthi_gripe_adm	0.679743	1.41322e-08	0.000938442	malQ	2.4.1.25	GH77
MGYG000123632_01334	food_porridge_pulp_adm	2.70517	1.43625e-08	0.000946067	pulA	3.2.1.41; 3.2.1.93	CBM48; GH13
MGYG000255598_00327	food_porridge_pulp_adm	1.95035	1.44229e-08	0.000948054		3.2.1.1; 3.2.1.20; 5.4.99.16	GH13; GH31
MGYG000096253_01133	food_porridge_pulp_adm	3.13975	1.454e-08	0.000951899	pulA	3.2.1.41	CBM48; GH13
MGYG000163485_01682	food_formula_powder_milk_adm	0.437522	1.46626e-08	0.000955907		3.2.1.78	GH26
MGYG000180503_02218	food_animal_milk_adm	1.37663	1.48021e-08	0.000960445		3.2.1.99	GH43
MGYG000001550_02332	food_gutthi_gripe_adm	0.709056	1.48036e-08	0.000960495	amyS	3.2.1.1	GH13
MGYG000044458_01565	food_animal_milk_adm	1.08345	1.48657e-08	0.000962507		3.2.1.133; 3.2.1.135; 3.2.1.54; 3.5.4.33	GH13
MGYG000154368_00334	food_porridge_pulp_adm	1.88401	1.48797e-08	0.000962962	celA	3.2.1.4	GH5; GH9
MGYG000003884_00928	food_porridge_pulp_adm	2.12738	1.49e-08	0.000963618		2.4.1.337	GT4
MGYG000181783_01534	food_tea_adm	0.564953	1.49296e-08	0.000964575		3.2.1.51	GH29
MGYG000119216_00620	food_animal_milk_adm	1.29246	1.4952e-08	0.000965299		3.2.1.21	GH3
MGYG000023251_00642	food_porridge_pulp_adm	3.10752	1.50173e-08	0.000967406		3.2.1.4	GH5; GH9
MGYG000034485_01141	food_tea_adm	0.562702	1.51005e-08	0.000970081	bglB_4	3.2.1.21	GH3
MGYG000051544_01858	food_porridge_pulp_adm	3.92605	1.51161e-08	0.000970582		3.2.1.51	GH29
MGYG000198521_00468	food_porridge_pulp_adm	2.04403	1.51346e-08	0.000971176		3.2.1.24	GH38
MGYG000247935_01835	food_sugar_water_adm	0.547954	1.52244e-08	0.000974055		3.2.1.133; 3.2.1.135; 3.2.1.54; 3.5.4.33	GH13
MGYG000036042_01256	food_porridge_pulp_adm	2.40084	1.52407e-08	0.000974575		2.4.99.12; 2.4.99.13; 2.4.99.14; 2.4.99.15	GT30
MGYG000031838_00923	food_porridge_pulp_adm	1.57847	1.53099e-08	0.000976784		2.4.1.129; 3.4.16.4	GT51
MGYG000091714_02383	food_porridge_pulp_adm	2.69551	1.54163e-08	0.000980175	malP	2.4.1.1	GT35
MGYG000039148_01504	food_porridge_pulp_adm	1.61048	1.54856e-08	0.000982375	bclA	2.7.7.7; 3.2.1.4; 5.4.99.22	GH5; GH9
MGYG000076014_00662	food_porridge_pulp_adm	1.45833	1.55328e-08	0.000983868		4.2.2.23	PL11
MGYG000043733_00391	food_porridge_pulp_adm	2.01908	1.55895e-08	0.000985662		2.4.1.315	GT28
MGYG000004684_00862	food_formula_powder_milk_adm	0.420072	1.56008e-08	0.000986019		3.2.1.26	GH32
MGYG000004884_01333	food_porridge_pulp_adm	2.63029	1.57822e-08	0.000991732		3.2.1.55	GH51
MGYG000179407_00344	food_porridge_pulp_adm	2.48367	1.60087e-08	0.00099882	glgB	2.4.1.18	CBM48; GH13
MGYG000185930_00468	food_porridge_pulp_adm	2.80119	1.60139e-08	0.000998983		3.2.1.99	GH43
MGYG000103881_01560	food_porridge_pulp_adm	5.49194	1.60582e-08	0.00100036	vpr	2.7.11.1; 3.1.3.90; 3.1.4.12; 3.2.1.4; 3.2.1.8; 3.2.1.81; 3.2.1.82; 3.4.16.4; 3.4.21.96	GH28; GH5; GH9
MGYG000002721_01465	food_animal_milk_adm	0.917258	1.62645e-08	0.00100676	abf2	3.2.1.55	GH51
MGYG000134606_01093	food_porridge_pulp_adm	5.3845	1.6306e-08	0.00100804		3.2.1.55	GH51
MGYG000204085_01067	food_tea_adm	1.63572	1.63144e-08	0.0010083	mtgA	2.4.1.129	GT51
MGYG000101806_00647	food_porridge_pulp_adm	2.03394	1.64033e-08	0.00101104	murG	2.4.1.227	GT28
MGYG000208903_00265	food_porridge_pulp_adm	2.2145	1.64193e-08	0.00101154	nanH	3.2.1.18	GH33
MGYG000231700_01742	food_porridge_pulp_adm	3.25668	1.64483e-08	0.00101243		3.2.1.21	GH3
MGYG000000908_01204	food_porridge_pulp_adm	4.9099	1.65734e-08	0.00101627		3.2.1.86	GT1
MGYG000168047_00794	food_porridge_pulp_adm	2.71413	1.65908e-08	0.0010168		3.2.1.1	GH13
MGYG000002073_00929	food_porridge_pulp_adm	2.47456	1.66338e-08	0.00101811		3.2.1.96; 3.4.17.14; 3.5.1.28	GH73
MGYG000002949_02311	food_formula_powder_milk_adm	0.404794	1.68929e-08	0.001026	malQ	2.4.1.25	GH77
MGYG000033122_00724	food_animal_milk_adm	1.11393	1.69432e-08	0.00102752	malQ_1	2.4.1.25	GH77
MGYG000060766_01078	food_gutthi_gripe_adm	1.44916	1.71207e-08	0.00103288	glgA	2.4.1.21	GT5
MGYG000082920_01141	food_porridge_pulp_adm	2.19941	1.72563e-08	0.00103696		3.2.1.37	GH43
MGYG000197074_01103	food_porridge_pulp_adm	1.4336	1.73142e-08	0.00103869		3.2.1.4	GH5; GH9
MGYG000054790_02462	food_porridge_pulp_adm	4.8541	1.7335e-08	0.00103931	murG	2.4.1.227	GT28
MGYG000225502_00387	breast_feeding	2.50928	2.57141e-09	0.00104332	gtfA	2.4.1.7	GH13
MGYG000047926_02016	breast_feeding	3.10875	2.57533e-09	0.00104401		3.2.1.26	GH32
MGYG000149522_02385	food_animal_milk_adm	1.37895	1.7739e-08	0.00105133		2.4.1.4; 3.2.1.1; 5.4.99.16	GH13
MGYG000026880_00241	food_porridge_pulp_adm	4.71376	1.7806e-08	0.00105331		3.2.1.78	GH26
MGYG000000398_01659	food_porridge_pulp_adm	1.13735	1.78203e-08	0.00105373		3.2.1.4	GH5; GH9
MGYG000097063_00547	food_gutthi_gripe_adm	0.75786	1.78536e-08	0.00105471	glgP	2.4.1.1	GT35
MGYG000228394_00687	food_porridge_pulp_adm	2.59151	1.81052e-08	0.0010621		3.2.1.26	GH32
MGYG000207075_00647	food_animal_milk_adm	1.69483	1.81199e-08	0.00106253		2.4.1.291	GT4
MGYG000250524_01084	food_porridge_pulp_adm	1.63677	1.82187e-08	0.00106541		3.2.1.4	GH5; GH9
MGYG000159552_00274	food_porridge_pulp_adm	5.04841	1.82535e-08	0.00106643		2.4.1.52	GT4
MGYG000194628_00509	food_formula_powder_milk_adm	0.423094	1.85082e-08	0.00107382		3.2.1.177	GH31
MGYG000142571_01757	food_gutthi_gripe_adm	1.29185	1.85798e-08	0.00107589		3.2.1.51	GH95
MGYG000004884_00706	food_porridge_pulp_adm	2.75114	1.85828e-08	0.00107598		3.2.1.177	GH31
MGYG000056277_02245	food_porridge_pulp_adm	3.68571	1.88811e-08	0.00108455		3.2.1.21	GH3
MGYG000244748_00300	food_formula_powder_milk_adm	0.786703	1.89316e-08	0.001086	celA	3.2.1.4	GH5; GH9
MGYG000000908_00004	food_porridge_pulp_adm	4.78632	1.89578e-08	0.00108674	malL_2	3.2.1.10; 3.2.1.20	GH13; GH31
MGYG000174687_00578	food_formula_powder_milk_adm	0.405984	1.90207e-08	0.00108854	malP_1	2.4.1.1	GT35
MGYG000000953_00696	food_animal_milk_adm	1.15838	1.90887e-08	0.00109048	treC	3.2.1.93	GH13
MGYG000116916_01297	food_porridge_pulp_adm	3.94869	1.95146e-08	0.00110253	xynD	3.2.1.55	CBM6; GH43
MGYG000003013_00645	food_formula_powder_milk_adm	0.419759	1.95799e-08	0.00110436		2.4.1.83	GT2
MGYG000004798_02065	food_sugar_water_adm	0.500176	1.97346e-08	0.0011087		2.4.1.187	GT26
MGYG000004783_00651	food_porridge_pulp_adm	2.10968	1.97673e-08	0.00110962	glgB	2.4.1.18	CBM48; GH13
MGYG000177401_00703	food_porridge_pulp_adm	2.07422	1.98944e-08	0.00111316		3.2.1.26	GH32
MGYG000187914_01622	food_formula_powder_milk_adm	0.6549	1.99402e-08	0.00111444		3.2.1.1	GH13
MGYG000133768_00812	food_gutthi_gripe_adm	1.35091	2.00538e-08	0.0011176		3.2.1.21	GH3
MGYG000003301_00478	food_animal_milk_adm	1.50652	2.0172e-08	0.00112087	glgA	2.4.1.21	GT5
MGYG000000762_00614	food_formula_powder_milk_adm	0.405942	2.03907e-08	0.0011269	neu	3.2.1.18	GH33
MGYG000188100_00101	food_animal_milk_adm	1.93663	2.04042e-08	0.00112727		3.2.1.21	GH3
MGYG000058223_00982	food_porridge_pulp_adm	4.10934	2.04636e-08	0.00112891		2.4.1.25	GH77
MGYG000001922_01202	food_porridge_pulp_adm	1.78133	2.05314e-08	0.00113077	spoIID	3.5.1.28	CBM50
MGYG000015825_00622	food_porridge_pulp_adm	2.19379	2.09719e-08	0.00114277	glgA	2.4.1.21	GT5
MGYG000271713_01750	food_porridge_pulp_adm	2.13831	2.09901e-08	0.00114327	bglB_4	3.2.1.21	GH3
MGYG000000871_00889	food_gutthi_gripe_adm	0.627926	2.10011e-08	0.00114357	amyA2	3.2.1.135	GH13
MGYG000000176_03917	food_gutthi_gripe_adm	0.982055	2.11778e-08	0.00114834		3.2.1.21	GH3
MGYG000094330_01931	food_porridge_pulp_adm	5.04807	2.12918e-08	0.00115141	lacZ	3.2.1.23; 3.2.1.52	GH20
MGYG000179235_00389	food_porridge_pulp_adm	3.46102	2.13691e-08	0.00115349		2.4.1.187	GT26
MGYG000111296_00411	food_porridge_pulp_adm	3.24579	2.14161e-08	0.00115475	pbpD	2.4.1.129; 3.4.16.4	GT51
MGYG000287724_00969	food_formula_powder_milk_adm	0.414197	2.15525e-08	0.0011584		3.2.1.51	GH95
MGYG000078337_01558	food_porridge_pulp_adm	1.99309	2.16661e-08	0.00116143		3.2.1.18	GH33
MGYG000001095_01102	food_porridge_pulp_adm	2.71525	2.17089e-08	0.00116257		3.2.1.55	GH51
MGYG000002622_02202	food_animal_milk_adm	0.932172	2.18269e-08	0.00116571		3.2.1.26	GH32
MGYG000164700_01528	food_porridge_pulp_adm	1.94447	2.19329e-08	0.00116852		2.4.1.187	GT26
MGYG000056532_02475	food_animal_milk_adm	0.986941	2.19779e-08	0.00116971		3.2.1.41	CBM48; GH13
MGYG000003361_00757	breast_feeding	2.56411	3.35836e-09	0.00117154		3.2.1.86	GT1
MGYG000138318_04461	food_animal_milk_adm	1.63011	2.20722e-08	0.00117221		3.2.1.21	GH3
MGYG000001169_01484	food_animal_milk_adm	1.12061	2.21987e-08	0.00117554		3.2.1.26	GH32
MGYG000099961_03648	food_porridge_pulp_adm	1.30143	2.25308e-08	0.00118425	CP_0954	4.2.2.1	PL8
MGYG000282763_00685	food_gutthi_gripe_adm	1.25505	2.2881e-08	0.00119336		3.2.1.26	GH32
MGYG000031375_01505	food_porridge_pulp_adm	7.38536	2.29934e-08	0.00119627		3.2.1.21	GH3
MGYG000270010_01515	food_porridge_pulp_adm	5.61799	2.30002e-08	0.00119644		3.2.1.86	GT1
MGYG000256998_00257	food_porridge_pulp_adm	4.50844	2.3074e-08	0.00119835	CP_0954	4.2.2.1	PL8
MGYG000226186_01289	food_gutthi_gripe_adm	2.79712	2.37717e-08	0.00121621		3.2.1.51	GH95
MGYG000272326_01227	food_porridge_pulp_adm	3.67765	2.39624e-08	0.00122104		3.2.1.4	GH5; GH9
MGYG000003393_02189	food_gutthi_gripe_adm	0.763539	2.4418e-08	0.00123251	celY	3.2.1.4	GH8
MGYG000267041_00082	food_porridge_pulp_adm	1.74267	2.44791e-08	0.00123404	pulA	3.2.1.41	CBM48; GH13
MGYG000131180_00197	food_animal_milk_adm	1.56726	2.45048e-08	0.00123469	glgB	2.4.1.18; 3.2.1.141	CBM48; GH13
MGYG000170114_01732	food_animal_milk_adm	0.975835	2.45321e-08	0.00123537	bglX	3.2.1.21	GH3
MGYG000094053_00011	food_animal_milk_adm	1.43052	2.46519e-08	0.00123836		3.2.1.136	GH5
MGYG000269363_00918	typical_food_pulses_seeds	0.50166	3.81841e-09	0.00123839		2.4.1.11	GT3
MGYG000185240_04236	food_animal_milk_adm	1.10024	2.46652e-08	0.00123869	yicI	3.2.1.20	GH31
MGYG000276100_06928	food_animal_milk_adm	1.39878	2.48073e-08	0.00124223		3.2.1.20	GH31
MGYG000001263_01731	food_animal_milk_adm	1.07653	2.51073e-08	0.00124966	pbpC	2.4.1.129	GT51
MGYG000000620_00016	breast_feeding	3.01521	3.9013e-09	0.00124993	comEA	2.4.1.21	GT5
MGYG000066433_01820	food_gutthi_gripe_adm	0.906757	2.51223e-08	0.00125003		3.2.1.51	GH29
MGYG000203074_01976	food_tea_adm	0.85828	2.55571e-08	0.00126071		3.2.1.37	GH43
MGYG000074183_00262	food_porridge_pulp_adm	2.61606	2.55696e-08	0.00126102		3.2.1.4	GH5; GH9
MGYG000002073_00251	food_porridge_pulp_adm	1.51041	2.58969e-08	0.001269		3.2.1.18	GH33
MGYG000241713_00531	food_porridge_pulp_adm	1.69237	2.6245e-08	0.00127742	spr	3.4.17.13	CBM50
MGYG000088362_00942	food_porridge_pulp_adm	3.30264	2.64314e-08	0.00128191		3.2.1.133; 3.2.1.135; 3.2.1.54; 3.5.4.33	GH13
MGYG000212800_01709	breast_feeding	2.72242	4.19272e-09	0.00128936	malL	2.4.1.4; 3.2.1.1; 3.2.1.20; 5.4.99.16	GH13; GH31
MGYG000288839_01322	food_animal_milk_adm	1.35894	2.68532e-08	0.00129201		3.2.1.55	GH51
MGYG000204703_01348	food_porridge_pulp_adm	2.42067	2.68695e-08	0.0012924		3.2.1.4	GH5; GH9
MGYG000143412_00008	food_gutthi_gripe_adm	1.43481	2.69358e-08	0.00129398		3.2.1.21	GH3
MGYG000027508_00720	food_porridge_pulp_adm	3.30158	2.70763e-08	0.00129732		2.4.1.315	GT28
MGYG000049890_00561	food_porridge_pulp_adm	2.55832	2.70854e-08	0.00129754	murG	2.4.1.227	GT28
MGYG000125847_01761	food_porridge_pulp_adm	1.30024	2.71473e-08	0.00129901		3.2.1.156	GH8
MGYG000090090_01258	food_porridge_pulp_adm	2.5017	2.73167e-08	0.00130302	malL	3.2.1.1; 3.2.1.10	GH13
MGYG000158855_03622	food_formula_powder_milk_adm	0.387904	2.74459e-08	0.00130606		3.2.1.86	GT1
MGYG000134803_00603	food_porridge_pulp_adm	4.02876	2.74561e-08	0.0013063	malQ	2.4.1.25	GH77
MGYG000011774_02373	food_animal_milk_adm	1.64445	2.74754e-08	0.00130676		3.2.1.180	GH88
MGYG000015169_01745	food_porridge_pulp_adm	3.34227	2.75378e-08	0.00130823		3.2.1.21	GH3
MGYG000000623_00986	food_porridge_pulp_adm	1.82496	2.75957e-08	0.00130959	malQ	2.4.1.25	GH77
MGYG000267360_01563	food_porridge_pulp_adm	3.35552	2.78715e-08	0.00131606	glgB	2.4.1.18	CBM48; GH13
MGYG000230826_00731	typical_food_pulses_seeds	0.500516	4.39984e-09	0.00131641	glgB	2.4.1.18	CBM48; GH13
MGYG000077567_01214	food_porridge_pulp_adm	4.16909	2.80633e-08	0.00132053	malP	2.4.1.1	GT35
MGYG000051688_02020	food_porridge_pulp_adm	3.77168	2.81437e-08	0.00132241		3.2.1.78	GH26
MGYG000254210_01848	food_porridge_pulp_adm	2.65989	2.81547e-08	0.00132266	glgP	2.4.1.1	GT35
MGYG000051544_00753	food_porridge_pulp_adm	3.83299	2.82228e-08	0.00132425		2.4.1.4; 3.2.1.1; 5.4.99.16	GH13
MGYG000002056_01358	food_porridge_pulp_adm	1.49854	2.82596e-08	0.0013251	celB	3.2.1.4	GH5; GH9
MGYG000040674_01606	food_porridge_pulp_adm	3.28978	2.85379e-08	0.00133155		3.2.1.51	GH95
MGYG000202205_00259	food_porridge_pulp_adm	2.14775	2.87431e-08	0.00133628	ponA	2.4.1.129; 3.4.16.4	GT51
MGYG000182699_00530	food_tea_adm	0.889658	2.89792e-08	0.0013417		2.4.1.187	GT26
MGYG000003382_00633	food_animal_milk_adm	1.17585	2.90023e-08	0.00134223	malQ	2.4.1.25	GH77
MGYG000230881_00271	food_porridge_pulp_adm	2.09864	2.90553e-08	0.00134344		3.2.1.37	GH43
MGYG000232002_00735	food_gutthi_gripe_adm	1.01383	2.91598e-08	0.00134583		3.2.1.24	GH38
MGYG000060966_05086	food_animal_milk_adm	1.62823	2.937e-08	0.00135062		3.2.1.21	GH3
MGYG000001318_03322	food_animal_milk_adm	0.902956	2.94865e-08	0.00135327	treY	5.4.99.15	GH13
MGYG000180917_00315	food_formula_powder_milk_adm	0.39655	2.97747e-08	0.0013598	ndvB	2.4.1.321	GH94; GT84
MGYG000251277_01484	food_porridge_pulp_adm	4.92028	2.99123e-08	0.00136291	pulA	3.2.1.41	CBM48; GH13
MGYG000011969_02027	food_porridge_pulp_adm	2.45007	2.99675e-08	0.00136415	malQ	2.4.1.25	GH77
MGYG000258944_00851	food_animal_milk_adm	0.952025	2.99888e-08	0.00136463		2.4.1.11	GT3
MGYG000058217_01249	food_porridge_pulp_adm	3.00684	3.02131e-08	0.00136967		2.4.1.129; 3.4.16.4	GT51
MGYG000018437_00894	food_porridge_pulp_adm	1.69622	3.02557e-08	0.00137062		2.4.1.129; 3.4.16.4	GT51
MGYG000014038_00101	food_porridge_pulp_adm	5.92421	3.042e-08	0.0013743		2.7.8.12	GT2
MGYG000003072_04108	food_formula_powder_milk_adm	0.394848	3.07657e-08	0.001382		3.2.1.156	GH8
MGYG000145789_01632	food_porridge_pulp_adm	2.25751	3.1122e-08	0.00138989		3.2.1.86	GT1
MGYG000002579_00330	food_animal_milk_adm	1.48212	3.1537e-08	0.00139902	mngB	3.2.1.170	GH38
MGYG000058112_00598	food_porridge_pulp_adm	2.25235	3.15907e-08	0.0014002	glgA	2.4.1.21	GT5
MGYG000127318_01240	food_animal_milk_adm	2.34183	3.16004e-08	0.00140041		3.2.1.1	GH13
MGYG000073787_02924	food_porridge_pulp_adm	2.51387	3.1643e-08	0.00140135		2.4.1.52	GT4
MGYG000039740_01327	food_porridge_pulp_adm	2.48945	3.16536e-08	0.00140158		2.4.1.129; 3.4.16.4	GT51
MGYG000281391_01195	food_porridge_pulp_adm	2.58368	3.17152e-08	0.00140292		3.2.1.4	GH5; GH9
MGYG000017455_01182	food_porridge_pulp_adm	3.98659	3.18172e-08	0.00140515	celC	3.2.1.4	GH5; GH9
MGYG000071104_00600	food_porridge_pulp_adm	5.5544	3.1882e-08	0.00140657		2.4.1.129; 3.4.16.4	GT51
MGYG000125319_01062	food_porridge_pulp_adm	2.11951	3.21873e-08	0.00141321		3.2.1.51	GH29
MGYG000201058_01660	food_porridge_pulp_adm	1.89541	3.25625e-08	0.00142132		3.2.1.52	GH20
MGYG000122977_01080	food_porridge_pulp_adm	1.89229	3.26367e-08	0.00142292		3.2.1.4	GH5; GH9
MGYG000230140_00341	food_porridge_pulp_adm	1.73982	3.32266e-08	0.00143557		3.2.1.133; 3.2.1.135; 3.2.1.54; 3.5.4.33	GH13
MGYG000014092_02488	food_animal_milk_adm	1.12845	3.35549e-08	0.00144255	malQ	2.4.1.25	GH77
MGYG000185930_00282	food_porridge_pulp_adm	2.65944	3.36304e-08	0.00144416	sap	3.2.1.1; 3.5.1.28	GH13
MGYG000000176_04768	food_porridge_pulp_adm	1.57465	3.38874e-08	0.0014496		3.2.1.21	GH3
MGYG000002756_02080	food_porridge_pulp_adm	1.57651	3.39345e-08	0.00145059		3.2.1.1; 3.2.1.10	GH13
MGYG000173221_01505	breast_feeding	2.68126	5.63157e-09	0.00146354	glgP	2.4.1.1	GT35
MGYG000255704_09120	food_animal_milk_adm	1.46266	3.48613e-08	0.00147001		3.2.1.180	GH88
MGYG000002531_00993	food_gutthi_gripe_adm	0.755111	3.48935e-08	0.00147068		3.2.1.156	GH8
MGYG000196983_01168	food_porridge_pulp_adm	1.47512	3.50542e-08	0.00147402		3.2.1.21	GH3
MGYG000049388_01430	food_porridge_pulp_adm	4.35239	3.51356e-08	0.00147571	glgB	2.4.1.18	CBM48; GH13
MGYG000111186_00217	food_formula_powder_milk_adm	0.481051	3.52064e-08	0.00147717	usp	3.5.1.104; 3.5.1.28	CBM50
MGYG000139545_02731	food_porridge_pulp_adm	5.3925	3.55417e-08	0.0014841		2.4.1.11	GT4
MGYG000117111_00811	food_formula_powder_milk_adm	1.05575	3.56181e-08	0.00148567		3.2.1.4	GH5; GH9
MGYG000003019_01095	food_gutthi_gripe_adm	0.794354	3.56902e-08	0.00148716	glgA	2.4.1.21	GT5
MGYG000027339_03154	food_porridge_pulp_adm	4.53967	3.57567e-08	0.00148852		4.2.2.1	PL8
MGYG000023325_00771	food_porridge_pulp_adm	3.07878	3.61903e-08	0.0014974		2.4.1.1	GT35
MGYG000001876_02478	food_porridge_pulp_adm	3.66866	3.62864e-08	0.00149936		3.2.1.21	GH3
MGYG000000523_01740	food_porridge_pulp_adm	2.29438	3.63609e-08	0.00150088		2.3.1.204; 3.2.1.170; 3.2.1.24	GH38
MGYG000228990_00459	food_animal_milk_adm	1.19996	3.6573e-08	0.00150519	spr	3.4.17.13	CBM50
MGYG000221147_00446	food_porridge_pulp_adm	3.03858	3.66971e-08	0.0015077	cbpD	3.2.1.96; 3.4.17.14; 3.4.24.40; 3.5.1.28; 3.5.1.78; 6.3.1.8	CBM50
MGYG000047217_01251	food_porridge_pulp_adm	2.08584	3.72975e-08	0.00151981		2.4.1.337	GT4
MGYG000234691_00333	food_porridge_pulp_adm	1.99819	3.73073e-08	0.00152001	malQ_1	2.4.1.25	GH77
MGYG000002601_02330	food_porridge_pulp_adm	1.59633	3.73171e-08	0.00152021	chiD	3.2.1.14	GH18
MGYG000000908_00954	food_porridge_pulp_adm	4.73327	3.73512e-08	0.00152089		3.2.1.26	GH32
MGYG000133866_00761	food_formula_powder_milk_adm	0.366673	3.75381e-08	0.00152464		3.2.1.18	GH33
MGYG000021200_04472	food_gutthi_gripe_adm	0.951129	3.76616e-08	0.00152711	lacZ	3.2.1.23; 3.2.1.52	GH20
MGYG000080059_01242	breast_feeding	3.00578	6.22688e-09	0.0015278		3.2.1.21	GH3
MGYG000127507_01610	breast_feeding	1.84587	6.23821e-09	0.00152899	malQ	2.4.1.25	GH77
MGYG000036742_01875	food_gutthi_gripe_adm	0.656024	3.79921e-08	0.0015337		3.2.1.14	GH18
MGYG000189405_01927	food_porridge_pulp_adm	2.40903	3.83063e-08	0.00153994	tagA	2.4.1.187	GT26
[truncated: 6,517 more rows]
