# Supplementary material for: Ancestral trajectory of infant gut microbiome assembly in non-industrialised populations
Source: Research Square preprint supplement (doi:10.21203/rs.3.rs-6675732/v1), 2025-05-30
Supplement: Supplementary file 5 [file 6e688c481940cd02abc120f1.xlsx]

## Sheet: Sheet1
Species	Peak age (months)	Stage
s__Escherichia coli	<=2.0	Pioneer
s__Bifidobacterium infantis	<=2.0	Pioneer
s__Bifidobacterium breve	6	Transition
s__Faecalibacterium longum	22.2	Transition
s__Bifidobacterium bifidum	9.11	Transition
s__Streptococcus sp000187445	<=2.0	Pioneer
s__Streptococcus lactarius	<=2.0	Pioneer
s__Dorea_A longicatena_B	>=24.0	Expansion
s__Streptococcus sp934229725	2.67	Transition
s__Copromonas sp900066535	23.8	Transition
s__Enterocloster sp900541315	>=24.0	Expansion
s__Anaerostipes hadrus	>=24.0	Expansion
s__Ligilactobacillus ruminis	16.7	Transition
s__Agathobaculum butyriciproducens	>=24.0	Expansion
s__Dorea formicigenerans	>=24.0	Expansion
s__Senegalimassilia anaerobia	>=24.0	Expansion
s__Veillonella parvula_A	18.4	Transition
s__Ruminococcus_B gnavus	<=2.0	Pioneer
s__Gemmiger formicilis	>=24.0	Expansion
s__Bacteroides fragilis	<=2.0	Pioneer
s__Veillonella sp022737715	>=24.0	Expansion
s__Veillonella sp934230905	<=2.0	Pioneer
s__Intestinibacter bartlettii	>=24.0	Expansion
s__Klebsiella pneumoniae	<=2.0	Pioneer
s__Flavonifractor plautii	14.9	Transition
s__Bifidobacterium longum	>=24.0	Expansion
s__Megamonas funiformis	15.1	Transition
s__Parabacteroides distasonis	>=24.0	Expansion
s__Bacteroides uniformis	>=24.0	Expansion
s__Veillonella sp900538355	>=24.0	Expansion
s__Phocaeicola vulgatus	>=24.0	Expansion
s__Blautia_A massiliensis	>=24.0	Expansion
s__Sutterella wadsworthensis	>=24.0	Expansion
s__Veillonella sp018367495	10.7	Transition
s__Haemophilus_D parainfluenzae_K	>=24.0	Expansion
s__Prevotella copri_A	>=24.0	Expansion
s__Bacteroides ovatus	>=24.0	Expansion
s__Eggerthella lenta	<=2.0	Pioneer
s__Thomasclavelia ramosa	9.56	Transition
s__Bacteroides thetaiotaomicron	>=24.0	Expansion
s__Blautia_A wexlerae	>=24.0	Expansion
s__Fusicatenibacter saccharivorans	>=24.0	Expansion
s__Streptococcus salivarius	>=24.0	Expansion
s__Streptococcus lutetiensis	<=2.0	Pioneer
s__Blautia_A obeum	>=24.0	Expansion
s__Bifidobacterium sp002742445	>=24.0	Expansion
s__Mediterraneibacter faecis	>=24.0	Expansion
s__Anaerobutyricum hallii	>=24.0	Expansion
s__Veillonella atypica	>=24.0	Expansion
s__Streptococcus infantarius	17.8	Transition
s__Agathobacter faecis	>=24.0	Expansion
s__g__Veillonella__47660_4#28_clean_bin.18.orig_cleaned	>=24.0	Expansion
s__Veillonella_A sp000431435	<=2.0	Pioneer
s__Enterococcus_A avium	<=2.0	Pioneer
s__Collinsella aerofaciens_H	>=24.0	Expansion
s__Enterococcus_B faecium	<=2.0	Pioneer
s__Roseburia inulinivorans	>=24.0	Expansion
s__Clostridium sp900540255	>=24.0	Expansion
s__Prevotella sp934191715	>=24.0	Expansion
s__Limosilactobacillus mucosae	11.1	Transition
s__Bacteroides xylanisolvens	19.8	Transition
s__Parolsenella uli_B	<=2.0	Pioneer
s__Agathobacter rectalis	>=24.0	Expansion
s__Collinsella sp900556495	>=24.0	Expansion
s__Lachnospira eligens_A	>=24.0	Expansion
s__Anaeroglobus micronuciformis	5.78	Transition
s__Bifidobacterium kashiwanohense_A	16	Transition
s__Enterobacter roggenkampii	<=2.0	Pioneer
s__Faecalibacillus intestinalis	>=24.0	Expansion
s__Bacteroides fragilis_A	<=2.0	Pioneer
s__Weissella confusa	12.7	Transition
s__Clostridium_Q fessum	>=24.0	Expansion
s__Klebsiella quasipneumoniae	5.78	Transition
s__Copromonas sp900066785	>=24.0	Expansion
s__KLE1615 sp900066985	>=24.0	Expansion
s__Anaerobutyricum soehngenii	>=24.0	Expansion
s__Dialister sp022722495	>=24.0	Expansion
s__Lactobacillus paragasseri	<=2.0	Pioneer
s__KLE1615 sp934292725	>=24.0	Expansion
s__Faecalibacterium duncaniae	>=24.0	Expansion
s__Ruminococcus_E bromii_B	>=24.0	Expansion
s__Campylobacter infans	20.9	Transition
s__Coprococcus_A catus_A	>=24.0	Expansion
s__Catenibacterium sp000437715	>=24.0	Expansion
s__Blautia_A faecis	>=24.0	Expansion
s__Leuconostoc lactis	13.6	Transition
s__Bacteroides caccae	23.1	Transition
s__Blautia_A sp003471165	>=24.0	Expansion
s__Megasphaera sp000417505	12.4	Transition
s__Clostridium sp000435835	>=24.0	Expansion
s__Paratractidigestivibacter faecalis	>=24.0	Expansion
s__Holdemanella biformis	>=24.0	Expansion
s__Anaerotignum faecicola	>=24.0	Expansion
s__Acetatifactor sp003447295	>=24.0	Expansion
s__Odoribacter splanchnicus	>=24.0	Expansion
s__Limosilactobacillus fermentum	<=2.0	Pioneer
s__Acetatifactor sp900066565	>=24.0	Expansion
s__Faecalibacterium sp900539885	>=24.0	Expansion
s__Streptococcus pasteurianus	2.67	Transition
s__Lachnospira sp000436475	>=24.0	Expansion
s__Campylobacter_D jejuni	4.89	Transition
s__Holdemanella sp900556915	>=24.0	Expansion
s__CAG-217 sp000436335	>=24.0	Expansion
s__Coprococcus_A catus	>=24.0	Expansion
s__Faecalibacterium prausnitzii_D	>=24.0	Expansion
s__Bariatricus comes	>=24.0	Expansion
s__Parabacteroides merdae	>=24.0	Expansion
s__Phocaeicola dorei	>=24.0	Expansion
s__Bifidobacterium pseudocatenulatum	>=24.0	Expansion
s__CAG-41 sp900066215	>=24.0	Expansion
s__Acetatifactor intestinalis	>=24.0	Expansion
s__Alistipes shahii	>=24.0	Expansion
s__Roseburia hominis	>=24.0	Expansion
s__Lachnospira eligens	>=24.0	Expansion
s__Prevotella sp002265625	>=24.0	Expansion
s__Faecalibacterium prausnitzii_E	>=24.0	Expansion
s__Vescimonas coprocola	>=24.0	Expansion
s__Faecalibacterium sp900539945	>=24.0	Expansion
s__Enterobacter hormaechei_A	<=2.0	Pioneer
s__ER4 sp000765235	>=24.0	Expansion
s__Enterobacter cloacae	<=2.0	Pioneer
s__Sarcina ventriculi	>=24.0	Expansion
s__Gemmiger sp900539695	>=24.0	Expansion
s__Fusobacterium_A mortiferum	15.3	Transition
s__Ureaplasma sp900544585	>=24.0	Expansion
s__Streptococcus thermophilus	23.8	Transition
s__g__Bifidobacterium__47660_4#128_clean_bin.22.orig_cleaned	18.9	Transition
s__Veillonella sp900550455	10.2	Transition
s__Duodenibacillus massiliensis	>=24.0	Expansion
s__Mediterraneibacter lactaris	>=24.0	Expansion
s__Limisoma sp000437795	>=24.0	Expansion
s__Alistipes finegoldii	>=24.0	Expansion
s__Evtepia sp004556345	>=24.0	Expansion
s__Akkermansia muciniphila	>=24.0	Expansion
s__Dialister sp000434475	>=24.0	Expansion
s__Catenibacterium mitsuokai	>=24.0	Expansion
s__Streptococcus sp001556435	>=24.0	Expansion
s__Alistipes putredinis	>=24.0	Expansion
s__Eubacterium_I ramulus	>=24.0	Expansion
s__Oliverpabstia faecicola	>=24.0	Expansion
s__Fimenecus sp000432435	>=24.0	Expansion
s__Faecalimonas phoceensis	7.78	Transition
s__Oliverpabstia intestinalis	>=24.0	Expansion
s__Bifidobacterium kashiwanohense	11.8	Transition
s__g__Collinsella__47680_3#12_clean_bin.3.orig_cleaned	>=24.0	Expansion
s__Limosilactobacillus vaginalis	<=2.0	Pioneer
s__Blautia_A sp000436615	>=24.0	Expansion
s__Limosilactobacillus oris	<=2.0	Pioneer
s__Enterococcus_B hirae	>=24.0	Expansion
s__Enterocloster sp000431375	>=24.0	Expansion
s__Streptococcus vestibularis	>=24.0	Expansion
s__Sutterella wadsworthensis_A	19.3	Transition
s__Faecalibacillus faecis	>=24.0	Expansion
s__Vescimonas sp900552475	>=24.0	Expansion
s__Ligilactobacillus salivarius	<=2.0	Pioneer
s__Agathobaculum sp003481705	>=24.0	Expansion
s__Limosilactobacillus gastricus	<=2.0	Pioneer
s__Succinivibrio sp000431835	>=24.0	Expansion
s__Lachnospira rogosae	>=24.0	Expansion
s__Roseburia sp019411365	>=24.0	Expansion
s__Escherichia ruysiae	>=24.0	Expansion
s__Faecalibacterium prausnitzii_A	>=24.0	Expansion
s__Dorea_A longicatena	>=24.0	Expansion
s__Hominisplanchenecus faecis	>=24.0	Expansion
s__Bacteroides stercoris	21.3	Transition
s__Gemmiger qucibialis	>=24.0	Expansion
s__Prevotella sp900290275	>=24.0	Expansion
s__Mediterraneibacter torques	>=24.0	Expansion
s__Lactococcus garvieae	<=2.0	Pioneer
s__Alloprevotella timonensis	>=24.0	Expansion
s__Phocaeicola plebeius_A	<=2.0	Pioneer
s__Agathobaculum sp900544475	>=24.0	Expansion
s__Campylobacter_D upsaliensis	10.9	Transition
s__Prevotella stercorea	23.3	Transition
s__Agathobacter sp900317585	>=24.0	Expansion
s__Prevotella hominis	>=24.0	Expansion
s__Sutterella faecalis	>=24.0	Expansion
s__Sutterella sp934255515	>=24.0	Expansion
s__Bacteroides nordii	>=24.0	Expansion
s__Streptococcus macedonicus	<=2.0	Pioneer
s__Faecalibacterium prausnitzii_I	>=24.0	Expansion
s__ER4 sp900317525	>=24.0	Expansion
s__RUG115 sp900066395	23.3	Transition
s__Lachnospira sp000437735	>=24.0	Expansion
s__Dialister sp934193095	>=24.0	Expansion
s__Prevotella sp900546575	16.2	Transition
s__Prevotella sp900313215	>=24.0	Expansion
s__Streptococcus sp934196125	>=24.0	Expansion
s__Mitsuokella multacida	22.7	Transition
s__CAG-245 sp000435175	>=24.0	Expansion
s__Ventrimonas sp900555625	23.3	Transition
s__Alistipes onderdonkii	>=24.0	Expansion
s__Ruminococcus_C sp000433635	>=24.0	Expansion
s__COE1 sp001916965	>=24.0	Expansion
s__Eubacterium_I ramulus_A	>=24.0	Expansion
s__Prevotella sp003447235	>=24.0	Expansion
s__Prevotella sp900543975	>=24.0	Expansion
s__Eubacterium_G ventriosum	>=24.0	Expansion
s__Collinsella sp900754075	>=24.0	Expansion
s__CAG-103 sp900543625	>=24.0	Expansion
s__Bifidobacterium adolescentis	23.1	Transition
s__Brachyspira pilosicoli	>=24.0	Expansion
s__Anaerostipes sp900066705	>=24.0	Expansion
s__CAG-245 sp934131055	>=24.0	Expansion
s__Alloprevotella sp900540885	>=24.0	Expansion
s__Zag111 sp002103105	>=24.0	Expansion
s__Megasphaera sp900540735	21.6	Transition
s__Prevotella sp002251385	23.8	Transition
s__Stercorousia sp001765415	>=24.0	Expansion
s__Campylobacter_D coli	4.44	Transition
s__Ruminococcus_C callidus	>=24.0	Expansion
s__UBA1417 sp003531055	>=24.0	Expansion
s__Agathobacter sp905209075	>=24.0	Expansion
s__Schaedlerella sp900066545	>=24.0	Expansion
s__Helicobacter_B fennelliae	<=2.0	Pioneer
s__Parolsenella catena	>=24.0	Expansion
s__Prevotella sp900544825	2.89	Transition
s__Eubacterium_R sp000436835	>=24.0	Expansion
s__Ventrenecus sp905205665	23.1	Transition
s__Prevotella sp015074785	>=24.0	Expansion
s__Vescimonas sp000435975	>=24.0	Expansion
s__Prevotella sp900767615	>=24.0	Expansion
s__Blautia_A sp900066335	>=24.0	Expansion
s__Dysosmobacter sp001916835	>=24.0	Expansion
s__Faecalibacterium prausnitzii_J	>=24.0	Expansion
s__Faecalibacterium sp905215595	>=24.0	Expansion
s__Campylobacter_D sp900539255	>=24.0	Expansion
s__CAG-103 sp000432375	>=24.0	Expansion
s__Faecalibacterium sp900758465	>=24.0	Expansion
s__Holdemanella sp900547815	>=24.0	Expansion
s__Mediterraneibacter sp934309345	6.67	Transition
s__Megasphaera elsdenii	<=2.0	Pioneer
s__Prevotella sp000434975	>=24.0	Expansion
s__Ruminococcus_E sp003526955	>=24.0	Expansion
s__Eubacterium_R sp900542875	>=24.0	Expansion
s__Eubacterium_F sp003491505	>=24.0	Expansion
s__Limosilactobacillus portuensis	<=2.0	Pioneer
s__Phascolarctobacterium_A succinatutens	>=24.0	Expansion
s__Bacteroides clarus	<=2.0	Pioneer
s__Ruminococcus_D bicirculans	>=24.0	Expansion
s__Roseburia sp003470905	23.6	Transition
s__Ruminococcus_E sp934476515	22	Transition
s__CAG-95 sp900066375	>=24.0	Expansion
s__Wujia chipingensis	>=24.0	Expansion
s__Akkermansia muciniphila_B	14.2	Transition
s__Bulleidia sp900539965	20.9	Transition
s__UMGS1820 sp902797885	13.1	Transition
s__Ruminococcus_D sp934435205	>=24.0	Expansion
s__Vescimonas sp000435555	>=24.0	Expansion
s__Roseburia intestinalis	>=24.0	Expansion
s__Megasphaera sp001546855	3.11	Transition
s__Prevotella copri	<=2.0	Pioneer
s__CAG-269 sp003525075	>=24.0	Expansion
s__Butyribacter sp000436755	>=24.0	Expansion
s__Faecalibacterium sp934524985	>=24.0	Expansion
s__Faecalibacterium sp014858325	>=24.0	Expansion
s__Blautia stercoris	>=24.0	Expansion
s__Lachnospira sp000436535	<=2.0	Pioneer
s__Megasphaera massiliensis	<=2.0	Pioneer
s__Bifidobacterium catenulatum	>=24.0	Expansion
s__CAG-103 sp900757655	>=24.0	Expansion
s__Parabacteroides goldsteinii	<=2.0	Pioneer
s__Blautia_A schinkii	<=2.0	Pioneer
s__Limosilactobacillus reuteri_E	<=2.0	Pioneer
s__Megasphaera sp900554215	4	Transition
s__Coprococcus eutactus_A	>=24.0	Expansion
s__Bifidobacterium animalis	<=2.0	Pioneer
s__Faecalibacterium sp003449675	>=24.0	Expansion
s__Blautia_A sp900066205	<=2.0	Pioneer
s__Barnesiella intestinihominis	<=2.0	Pioneer
s__Phocaeicola coprocola	<=2.0	Pioneer
s__Anaerostipes sp018918155	<=2.0	Pioneer
s__Prevotella sp900546535	<=2.0	Pioneer
s__Faecousia sp900549705	>=24.0	Expansion
s__CAG-882 sp003486385	23.8	Transition
s__Vescimonas fastidiosa	>=24.0	Expansion
s__Megasphaera sp002319965	5.33	Transition
s__Lactobacillus crispatus	<=2.0	Pioneer
s__Veillonella_A seminalis	<=2.0	Pioneer
s__Parolsenella massiliensis	<=2.0	Pioneer
s__Vescimonas sp001916855	>=24.0	Expansion
s__Dialister invisus	>=24.0	Expansion
s__Prevotella sp021636625	<=2.0	Pioneer
s__Phascolarctobacterium faecium	<=2.0	Pioneer
s__Gemmiger variabilis_B	<=2.0	Pioneer
s__Alloprevotella sp900539625	>=24.0	Expansion
s__Butyricicoccus_A intestinisimiae	>=24.0	Expansion
s__Prevotella sp000436035	>=24.0	Expansion
s__Parolsenella uli_A	<=2.0	Pioneer
s__Aeromonas caviae	<=2.0	Pioneer
s__Clostridium butyricum	<=2.0	Pioneer
s__Butyrivibrio_A crossotus	>=24.0	Expansion
s__CAG-317 sp000433215	>=24.0	Expansion
s__CAG-177 sp003514385	<=2.0	Pioneer
s__Bifidobacterium sp022739095	<=2.0	Pioneer
s__Vescimonas sp003539495	>=24.0	Expansion
s__CAG-274 sp900545305	20.9	Transition
s__Faecalibacterium sp934525735	>=24.0	Expansion
s__Parabacteroides massiliensis	<=2.0	Pioneer
s__Butyribacter intestini	>=24.0	Expansion
s__CAG-568 sp000434395	>=24.0	Expansion
s__Prevotella copri_C	<=2.0	Pioneer
s__Campylobacter_D sp934718785	<=2.0	Pioneer
s__Anaerostipes rhamnosivorans	<=2.0	Pioneer
s__Onthousia sp934130405	>=24.0	Expansion
s__CAG-45 sp000438375	>=24.0	Expansion
s__Roseburia_A sp934364805	<=2.0	Pioneer
s__Prevotella sp934202525	<=2.0	Pioneer
s__Prevotella sp000436915	>=24.0	Expansion
s__Phascolarctobacterium_A sp900753045	>=24.0	Expansion
s__Eubacterium_R sp900539165	>=24.0	Expansion
s__Cryptobacteroides sp000435075	>=24.0	Expansion
s__Phocaeicola sp000434735	>=24.0	Expansion
s__Zag111 sp002102825	>=24.0	Expansion
s__Phascolarctobacterium_A sp022718015	<=2.0	Pioneer
s__Ruminococcus_E sp003438075	>=24.0	Expansion
s__CAG-170 sp000436735	>=24.0	Expansion
s__Megasphaera stantonii	<=2.0	Pioneer
s__Prevotella sp900555035	<=2.0	Pioneer
s__Acidaminococcus intestini	4.44	Transition
s__CAG-307 sp900547045	>=24.0	Expansion
s__CAG-307 sp001916215	<=2.0	Pioneer
s__Sutterella sp900770335	>=24.0	Expansion
s__Prevotella sp900551275	<=2.0	Pioneer
s__Comamonas kerstersii	>=24.0	Expansion
s__Bifidobacterium angulatum	<=2.0	Pioneer
s__Phascolarctobacterium_A sp934190775	<=2.0	Pioneer
s__CAG-269 sp001916065	<=2.0	Pioneer
s__Evtepia gabavorous	<=2.0	Pioneer
s__Helicobacter_C cinaedi	>=24.0	Expansion
s__Eubacterium_F sp900539115	>=24.0	Expansion
s__Agathobacter sp900543445	<=2.0	Pioneer
s__Coprobacter fastidiosus	<=2.0	Pioneer
s__Mesosutterella multiformis	<=2.0	Pioneer
s__Cetobacterium_A sp934085975	<=2.0	Pioneer
s__Prevotella sp002299635	<=2.0	Pioneer
s__Parolsenella sp900549525	14.7	Transition
s__Agathobacter sp900552085	>=24.0	Expansion
s__Prevotella sp900548745	<=2.0	Pioneer
s__Faecalibacterium prausnitzii_F	<=2.0	Pioneer
s__Alloprevotella sp900541575	<=2.0	Pioneer
s__Acidaminococcus massiliensis	<=2.0	Pioneer
s__Faecalibacterium sp900551435	<=2.0	Pioneer
s__UBA10281 sp900767885	>=24.0	Expansion
s__Anaerovibrio sp900548165	<=2.0	Pioneer
s__Prevotella sp900553155	<=2.0	Pioneer
s__Caecibacter sp003467125	<=2.0	Pioneer
s__Eubacterium_R sp000433975	<=2.0	Pioneer
s__SFJ001 sp934513685	<=2.0	Pioneer
s__Prevotella sp945863825	<=2.0	Pioneer
s__VUNA01 sp002299625	<=2.0	Pioneer
s__Eubacterium_R sp900539325	<=2.0	Pioneer
s__UMGS2037 sp934371505	<=2.0	Pioneer
s__Prevotella sp900553595	22.7	Transition
s__Parolsenella sp900544655	>=24.0	Expansion
s__Vescimonas sp900547745	<=2.0	Pioneer
s__Duodenibacillus intestinavium	<=2.0	Pioneer
s__Prevotella copri_B	<=2.0	Pioneer
s__Prevotella buccae	4.67	Transition
s__Mitsuokella jalaludinii	2.44	Transition
s__Dialister succinatiphilus	<=2.0	Pioneer
s__Zag111 sp003258735	<=2.0	Pioneer
s__CAG-603 sp900066105	<=2.0	Pioneer
s__Prevotella sp900552675	<=2.0	Pioneer
s__Anaerobutyricum sp934307085	<=2.0	Pioneer
s__CAG-448 sp003150135	<=2.0	Pioneer
s__Stercorousia sp900769355	<=2.0	Pioneer
s__Vescimonas sp900545495	<=2.0	Pioneer
s__Dialister sp934178345	<=2.0	Pioneer
s__Butyrivibrio_A sp000431815	<=2.0	Pioneer
s__CAG-194 sp000432915	<=2.0	Pioneer
s__Prevotella sp934230115	3.56	Transition
s__Prevotella sp900556795	<=2.0	Pioneer
s__Faecalibacterium sp934511465	<=2.0	Pioneer
s__UBA6398 sp003150315	<=2.0	Pioneer
s__CAG-605 sp000433475	<=2.0	Pioneer
s__Prevotella sp900765465	<=2.0	Pioneer
s__Providencia alcalifaciens_A	<=2.0	Pioneer
s__Pseudoruminococcus massiliensis	<=2.0	Pioneer
s__Helicobacter_D pullorum	<=2.0	Pioneer
s__g__Sutterella__47660_4#31_clean_bin.2.strict_cleaned	<=2.0	Pioneer
s__g__Bifidobacterium__39923_2#166_bin.30.strict_clean	<=2.0	Pioneer
s__Bacteroides faecis	<=2.0	Pioneer
s__Sellimonas intestinalis	<=2.0	Pioneer
s__Sodaliphilus sp004557565	<=2.0	Pioneer
s__14-2 sp012519695	<=2.0	Pioneer
s__Megasphaera elsdenii_A	<=2.0	Pioneer
s__Akkermansia muciniphila_E	<=2.0	Pioneer
s__Scatocola faecipullorum	<=2.0	Pioneer
s__Scybalousia sp900542735	<=2.0	Pioneer
s__Dialister hominis	<=2.0	Pioneer
s__Catenibacterium sp900764565	<=2.0	Pioneer
s__Oribacterium sp900770445	<=2.0	Pioneer
s__Acidaminococcus sp000437815	<=2.0	Pioneer
s__Faecalibacterium sp934525845	<=2.0	Pioneer
s__Anaerovibrio sp934203205	<=2.0	Pioneer
s__CAG-266 sp000436095	<=2.0	Pioneer
s__Megamonas gallistercoris	<=2.0	Pioneer
s__Cryptobacteroides sp900544195	<=2.0	Pioneer
s__CAG-196 sp900553895	<=2.0	Pioneer
s__NHYM01 sp944323755	<=2.0	Pioneer
s__Phascolarctobacterium_A sp900551335	3.33	Transition
s__Brachyspira sp934747485	<=2.0	Pioneer
s__CAG-353 sp900066885	<=2.0	Pioneer
s__CAG-353 sp900768995	<=2.0	Pioneer
s__Ligilactobacillus agilis	<=2.0	Pioneer
s__CAG-390 sp000437015	<=2.0	Pioneer
s__CAG-793 sp000433915	<=2.0	Pioneer
s__PeH17 sp000435055	<=2.0	Pioneer
s__RUG410 sp900769705	<=2.0	Pioneer
s__Eubacterium_R sp934525195	<=2.0	Pioneer
s__UBA3789 sp900543055	<=2.0	Pioneer
s__UBA1221 sp900770525	<=2.0	Pioneer
s__Phocaeicola coprophilus	<=2.0	Pioneer
s__Cryptobacteroides sp934700615	<=2.0	Pioneer
s__CAG-269 sp900552555	6	Transition
s__CAG-964 sp000435335	<=2.0	Pioneer
s__Eubacterium_R sp900539775	<=2.0	Pioneer
s__UBA10281 sp900556195	<=2.0	Pioneer
s__Mesosutterella massiliensis	<=2.0	Pioneer
s__UBA1829 sp900549415	<=2.0	Pioneer
s__Clostridium sp900539375	3.33	Transition
s__RUG410 sp900553115	<=2.0	Pioneer
s__CAG-605 sp934098565	<=2.0	Pioneer
s__Succinivibrio sp934218695	<=2.0	Pioneer
s__Cryptobacteroides sp000432515	<=2.0	Pioneer
s__Lactobacillus absiana	<=2.0	Pioneer
s__CAG-724 sp905202255	<=2.0	Pioneer
s__Prevotella sp022732315	<=2.0	Pioneer
s__Salmonella enterica	<=2.0	Pioneer
s__Phocaeicola barnesiae	<=2.0	Pioneer
s__Phocaeicola massiliensis	<=2.0	Pioneer
