# Supplementary material for: Ancestral trajectory of infant gut microbiome assembly in non-industrialised populations
Source: Research Square preprint supplement (doi:10.21203/rs.3.rs-6675732/v1), 2025-05-30
Supplement: Supplementary file 6 [file 72f69da7f05f9c5b7c54c683.xlsx]

## Sheet: Sheet1
Features	$R^2$
Species	0.6545
CAZy annotated GOs	0.643278
COG annotated GOs	0.641218
Pfam annotated GOs	0.636272
EggNOG annotated GOs	0.635963
Enzyme commission (EC) annotated GOs	0.634579
KEGG annotated GOs	0.634379
All UHGP-90 gene orthologues (GOs)	0.632741
HUMANN3 UniRef90	0.595979
