# Supplementary material for: Ancestral trajectory of infant gut microbiome assembly in non-industrialised populations
Source: Research Square preprint supplement (doi:10.21203/rs.3.rs-6675732/v1), 2025-05-30
Supplement: Supplementary file 7 [file 7c9a5f8a3f7e7ef18fbf10d4.xlsx]

## Sheet: Sheet1
metadata_category	distance_correlation	p_value	loo_distance_correlation	loo_p_value
age_adm	0.176905	0	0.110369	0
site	0.0262312	0	0.0062152	0
technical	0.0208571	0	0.00541688	0.001001
bloods	0.0280829	0	0.00524559	0.041041
cells	0.0181705	0	0.00366279	0.962963
diet	0.0293829	0	0.00261249	0.184184
malnutrition	0.00911358	0	0.00184259	0.00900901
previous_treatment	0.00320871	0.011011	0.00180023	0.278278
hiv	0.00141439	0	0.000569621	0.014014
season	0.000937848	0.0700701	0.000218038	0.747748
csection	0.00105568	0	0.000206403	0.133133
sex	0.000239772	0.754755	0.000116089	0.961962
