# Supplementary material for: Ancestral trajectory of infant gut microbiome assembly in non-industrialised populations
Source: Research Square preprint supplement (doi:10.21203/rs.3.rs-6675732/v1), 2025-05-30
Supplement: Supplementary file 8 [file 850bf7807c1ba5c60ee83a47.xlsx]

## Sheet: Sheet1
Sample accession	age_adm	sex_adm	breast_feeding_adm	site	country	continent	food_pure_honey_adm	food_sugar_water_adm	food_tea_adm	food_formula_powder_milk_adm	food_gutthi_gripe_adm	food_ animal_milk_adm	food_porridge_pulp_adm	typical_food_milkproducts	typical_food_cerealproducts	typical_food_root_tubers	typical_food_vegetables	typical_food_fruits	typical_food_pulses_seeds	typical_food_seafoods	typical_food_meat_poultry	typical_food_eggs	typical_food_fats_oils	typical_food_sugars_juices	typical_food_misc	muac_adm	whz_adm	collection_day_of_year	med_last7days_no_medication_adm	med_last7days_antibiotic_adm	med_last7days_antimalaria_adm	med_last7days_traditional_adm	med_last7days_deworming_adm	med_last7days_vitamin_adm	med_last7days_yes_unknown_adm	med_last7days_other_adm	admitted_hosp_adm	Batch	DNA Extracted	Lot No	PBS	Neg Control	Box No.	hivstatus_adm	diag_hiv_related_adm	delivery_mode_caesarean	sodium_adm	potassium_adm	calcium_adm
ERS6386396	3.42	2	1	Mbagathi	Kenya	Africa	0	0	0	0	0	0	0	0	0	0	0	0	0	0	0	0	0	0	0	13.85	0.3	0.210959	0	1	0	0	0	0	0	0	0	MS17	2021-04-30	146092	Bottle 2	NC17	2.0	0	0	1	137	5	2.47
ERS6386403	22.54	2	1	Mbagathi	Kenya	Africa	0	0	0	0	0	0	0	1	1	1	1	1	1	1	1	0	1	1	0	14.95	0.17	0.273973	0	0	0	0	0	0	0	0	0	MS17	2021-04-30	146092	Bottle 2	NC17	2.0	0	0	0	143	4.3	2.34
ERS6386384	2.1	2	1	Mbagathi	Kenya	Africa	0	0	0	0	0	0	0	0	0	0	0	0	0	0	0	0	0	0	0	9.05	-1.67	0.142466	0	1	0	0	0	0	1	0	0	MS16	2012-04-29	146092	Bottle 2	NC16	2.0	0	0	0	134	5	2.12
ERS6386424	4.2	1	1	Mbagathi	Kenya	Africa	0	0	0	0	0	0	0	0	0	0	0	1	0	0	0	0	0	0	0	13.55	0.55	0.430137	1	0	0	0	0	0	0	0	0	MS18	2021-05-04	146092	Bottle 3	NC18	5.0	0	0	0
ERS6386425	2.23	2	1	Mbagathi	Kenya	Africa	0	0	0	0	0	0	0	0	0	0	0	0	0	0	0	0	0	0	0	12.65	2.02	0.432877	1	0	0	0	0	0	0	0	0	MS18	2021-05-04	146092	Bottle 3	NC18	5.0	0	0	1
ERS7112867	14.52	1	0	Kampala	Uganda	Africa	0	0	0	0	0	0	0	1	1	0	0	1	1	0	0	0	0	0	0	12.8	-1.9	0.6	1	0	0	0	0	0	0	0	0	MS25	2021-05-13	146534	Bottle 3	NC25	11.0	3	0	0	140	3.8	2.45
ERS7112893	7.36	1	1	Kampala	Uganda	Africa	0	0	0	0	0	0	0	1	0	0	0	0	0	0	0	0	0	0	0	13.4	0.55	0.926027	1	0	0	0	0	0	0	0	0	MS25	2021-05-13	146534	Bottle 3	NC25	12.0	0	0	1	147	5.01	2.52
ERS7113384	8.44	2	1	Karachi	Pakistan	Asia	0	0	1	0	0	0	0	0	1	1	1	1	1	1	1	1	1	1	1	12.95	-1.52	0.684932	1	0	0	0	0	0	0	0	0	MS36	2021-06-02	149461	Bottle 4	NC36	14.0	0	0	0	141	4.5	3.53529
ERS7113390	3.02	1	1	Karachi	Pakistan	Asia	1	0	1	0	0	0	0	1	0	0	0	0	0	0	0	0	0	0	0	10.95	-2.33	0.169863	1	0	0	0	0	0	0	0	0	MS36	2021-06-02	149461	Bottle 4	NC36	14.0	0	0	1	140	5.3	3.64242
ERS7113398	14.09	1	1	Karachi	Pakistan	Asia	1	0	0	0	0	0	0	1	0	0	0	0	0	0	0	0	0	0	0	14.35	-0.21	0.287671	0	1	0	0	0	0	0	0	0	MS36	2021-06-02	149461	Bottle 4	NC36	14.0	0	0	0	142	3.9	3.42816
ERS7113401	23.09	2	1	Karachi	Pakistan	Asia	0	0	0	0	0	0	0	0	1	1	1	1	1	1	1	1	1	1	1	14.45	-0.33	0.558904	1	0	0	0	0	0	0	0	0	MS36	2021-06-02	149461	Bottle 4	NC36	14.0	0	0	0	139	4.7	3.49958
ERS7112872	8.94	2	1	Kampala	Uganda	Africa	0	0	0	0	0	0	0	1	0	0	0	0	1	1	0	0	0	0	0	13.35	-0.36	0.663014	1	0	0	0	0	0	0	0	0	MS25	2021-05-13	146534	Bottle 3	NC25	11.0	0	0	0	138	5.1	2.79
ERS7113405	7.98	2	1	Karachi	Pakistan	Asia	0	0	0	0	0	0	0	1	0	0	0	0	0	0	0	0	0	0	0	13.75	0.05	0.580822	0	1	0	0	0	0	0	1	0	MS36	2021-06-02	149461	Bottle 4	NC36	14.0	0	0	0	138	5.2	3.49958
ERS7113407	6.54	2	1	Karachi	Pakistan	Asia	0	0	0	0	0	0	0	1	0	0	0	0	0	0	0	0	0	0	0	12.05	-0.78	0.583562	0	0	0	0	0	0	1	0	0	MS36	2021-06-02	149461	Bottle 4	NC36	14.0	0	0	1	139	5.5	3.74955
ERS7113409	21.22	1	1	Karachi	Pakistan	Asia	0	0	0	0	1	0	0	0	1	1	1	1	1	0	1	1	1	1	1	14.4	-0.2	0.6	1	0	0	0	0	0	0	0	0	MS36	2021-06-02	149461	Bottle 4	NC36	14.0	0	0	0	139	4.3	3.60671
ERS7112951	13.44	1	1	Blantyre	Malawi	Africa	0	0	0	0	0	0	0	0	1	0	1	1	1	0	1	1	1	0	0	13.55	-0.34	0.720548	1	0	0	0	0	0	0	0	0	MS27	2021-05-17	146354	Bottle 4	NC27	12.0	0	0	1	145	5.6	2.63
ERS7113413	18.89	1	0	Karachi	Pakistan	Asia	0	1	0	0	0	0	0	1	0	0	0	1	1	0	0	0	0	0	0	13.55	-0.17	0.123288	1	0	0	0	0	0	0	0	0	MS36	2021-06-02	149461	Bottle 4	NC36	14.0	0	0	0	139	4.9	3.24961
ERS7112952	17.15	2	0	Blantyre	Malawi	Africa	0	0	0	0	0	0	0	0	1	0	0	0	0	0	1	0	1	0	0	14.35	-0.5	0.0575342	1	0	0	0	0	0	0	0	0	MS27	2021-05-17	146354	Bottle 4	NC27	12.0	0	0	0
ERS7113415	14.39	1	1	Karachi	Pakistan	Asia	1	0	0	0	0	0	0	0	1	0	0	0	0	0	0	0	0	0	0	13.6	-1.01	0.706849	1	0	0	0	0	0	0	0	0	MS36	2021-06-02	149461	Bottle 4	NC36	14.0	0	0	0	138	4.4	3.2139
ERS7112953	21.98	2	0	Blantyre	Malawi	Africa	0	0	0	0	0	0	0	0	1	0	0	0	0	0	0	1	1	0	0	13.85	-0.88	0.0657534	1	0	0	0	0	0	0	0	0	MS27	2021-05-17	146354	Bottle 4	NC27	12.0	0	0	1			2.5948
ERS7112956	9.86	1	1	Blantyre	Malawi	Africa	0	0	0	0	0	0	0	0	1	0	0	0	0	0	0	0	0	1	0	13.1	-0.63	0.0821918	1	0	0	0	0	0	0	0	0	MS27	2021-05-17	146354	Bottle 4	NC27	12.0	0	0	0	137	3.6	2.2954
ERS7113417	12.19	2	0	Karachi	Pakistan	Asia	1	0	0	0	0	0	0	0	1	1	0	0	1	0	0	0	1	1	1	13.65	-1.56	0.758904	1	0	0	0	0	0	0	0	0	MS36	2021-06-02	149461	Bottle 4	NC36	14.0	0	0	0	139	4.9	3.64242
ERS7112957	23.72	1	0	Blantyre	Malawi	Africa	0	0	0	0	0	0	0	1	0	0	1	1	1	1	0	1	0	1	0	16.6	0.97	0.0849315	1	0	0	0	0	0	0	0	0	MS27	2021-05-17	146354	Bottle 4	NC27	12.0	0	0	0	211	7.1	2.6447
ERS7113419	12.81	2	1	Karachi	Pakistan	Asia	1	0	0	0	0	0	0	1	1	1	1	1	1	1	1	1	1	1	1	12.55	-1.4	0.852055	0	1	0	0	0	0	1	0	0	MS36	2021-06-02	149461	Bottle 4	NC36	14.0	0	0	0	139	5.6	3.49958
ERS7112958	19.84	1	0	Blantyre	Malawi	Africa	0	0	0	0	0	0	0	0	1	0	1	0	1	0	0	0	1	1	0	14.65	-0.75	0.161644	1	0	0	0	0	0	0	0	0	MS27	2021-05-17	146354	Bottle 4	NC27	12.0	0	0	0	133	5.1	2.32035
ERS7113425	11.66	1	0	Karachi	Pakistan	Asia	1	0	0	0	0	0	0	1	1	1	1	0	0	0	0	1	0	1	1	14.75	0.32	0.961644	1	0	0	0	0	0	0	0	0	MS36	2021-06-02	149461	Bottle 4	NC36	14.0	0	0	0	136	5.1	3.53529
ERS7112960	17.48	2	0	Blantyre	Malawi	Africa	0	0	0	0	0	0	0	0	1	0	0	0	1	0	0	0	0	1	0	15.95	2.44	0.194521	0	1	0	0	0	0	0	0	0	MS27	2021-05-17	146354	Bottle 4	NC27	12.0	0	0	0	141	5.5	2.495
ERS7113430	15.34	1	0	Karachi	Pakistan	Asia	1	0	0	0	0	0	0	1	1	1	1	1	1	1	1	1	1	1	1	12.95	0.52	0.964384	1	0	0	0	0	0	0	0	0	MS37	2021-06-03	149461	Bottle 4	NC37	14.0	0	0	1	136	4.5	3.46387
ERS7112965	22.9	2	0	Blantyre	Malawi	Africa	0	0	0	0	0	0	0	0	1	0	1	0	1	0	0	0	0	0	0	16.1	0.35	0.493088	1	0	0	0	0	0	0	0	0	MS27	2021-05-17	146354	Bottle 4	NC27	12.0	0	0	0	150	5.3	2.495
ERS7112873	10.02	1	1	Kampala	Uganda	Africa	0	0	0	0	0	0	0	1	1	1	0	0	1	1	1	1	1	1	0	14.55	-0.08	0.679452	1	0	0	0	0	0	0	0	0	MS25	2021-05-13	146534	Bottle 3	NC25	11.0	0	0	0	132	5.2	2.63
ERS7113441	9.3	2	1	Karachi	Pakistan	Asia	1	0	0	0	0	0	0	0	1	0	1	0	0	0	0	1	0	0	0	15.45	0.89	0.134247	0	0	0	0	0	0	1	0	0	MS37	2021-06-03	149461	Bottle 4	NC37	14.0	0	0	1	135	5	3.35674
ERS7112967	20.76	2	0	Blantyre	Malawi	Africa	0	0	0	0	0	0	0	0	1	0	0	1	1	0	0	0	0	1	0	15.1	-1.45	0.235616	1	0	0	0	0	0	0	0	0	MS27	2021-05-17	146354	Bottle 4	NC27	12.0	0	0	0	141	4.4	2.2455
ERS7113447	6.11	1	1	Karachi	Pakistan	Asia	1	0	1	0	0	0	0	1	1	0	0	0	1	0	0	1	1	1	0	13.05	-1.29	0.158904	0	0	0	0	0	0	0	1	2	MS37	2021-06-03	149461	Bottle 4	NC37	14.0	0	0	0	135	4.6	3.39245
ERS7112970	22.17	2	0	Blantyre	Malawi	Africa	0	0	0	0	0	0	0	0	1	0	1	0	1	0	0	0	0	0	0	14.45	-0.72	0.235616	0	1	0	0	0	0	0	0	2	MS27	2021-05-17	146354	Bottle 4	NC27	12.0	3	0	0	141	4.5	2.3952
ERS7113450	4.63	1	1	Karachi	Pakistan	Asia	0	0	0	0	0	0	0	1	1	0	0	0	0	0	0	0	0	0	0	12.15	-1.44	0.178082	1	0	0	0	0	0	0	0	1	MS37	2021-06-03	149461	Bottle 4	NC37	14.0	0	0	0	140	5.9	3.82097
ERS7113452	22.31	2	0	Karachi	Pakistan	Asia	0	0	0	0	0	0	0	1	1	1	1	1	1	1	1	1	1	1	1	13.25	-1.4	0.19726	1	0	0	0	0	0	0	0	0	MS37	2021-06-03	149461	Bottle 4	NC37	14.0	0	0	0	141	4	3.35674
ERS7112971	21.19	1	0	Blantyre	Malawi	Africa	0	0	0	0	0	0	0	0	1	0	1	0	1	1	0	0	1	1	0	14.4	-0.49	0.493088	1	0	0	0	0	0	0	0	0	MS27	2021-05-17	146354	Bottle 4	NC27	12.0	4	0	0	140	3.9	2.2954
ERS7113457	17.28	2	1	Karachi	Pakistan	Asia	0	0	0	0	0	0	0	0	1	1	1	1	1	1	1	1	1	1	1	15.85	0.71	0.205479	1	0	0	0	0	0	0	0	0	MS37	2021-06-03	149461	Bottle 4	NC37	14.0	0	0	0	141	4.7	3.46387
ERS7112973	17.05	1	1	Blantyre	Malawi	Africa	0	0	0	0	0	0	0	0	1	0	1	0	1	1	0	0	1	1	0	13.65	-0.92	0.493088	0	0	1	0	0	0	0	0	0	MS27	2021-05-17	146354	Bottle 4	NC27	12.0	0	0	0	141	4.8	2.61975
ERS7113456	20.5	2	0	Karachi	Pakistan	Asia	1	0	0	0	0	0	0	1	1	1	1	1	1	1	1	1	1	1	1	14.4	-0.45	0.219178	1	0	0	0	0	0	0	0	0	MS37	2021-06-03	149461	Bottle 4	NC37	14.0	0	0	0	136	5	3.64242
ERS7112975	23.82	2	1	Blantyre	Malawi	Africa	0	0	0	0	0	0	0	0	1	0	1	0	1	0	1	1	0	1	0	16.25	1.13	0.271233	1	0	0	0	0	0	0	0	2	MS27	2021-05-17	146354	Bottle 4	NC27	12.0	0	0	0	152	5.1	2.66965
ERS7113460	12.16	2	1	Karachi	Pakistan	Asia	0	0	0	0	0	1	0	0	1	0	0	0	0	0	0	0	0	1	1	13.55	-0.49	0.230137	1	0	0	0	0	0	0	0	0	MS37	2021-06-03	149461	Bottle 4	NC37	14.0	0	0	0	137	4.6	3.49958
ERS7112977	6.08	1	1	Blantyre	Malawi	Africa	0	0	0	0	0	0	0	1	1	0	0	1	0	0	0	1	0	0	0	15.55	-1	0.493088	1	0	0	0	0	0	0	0	0	MS27	2021-05-17	146354	Bottle 4	NC27	12.0	0	0	0	144	4.6	2.6447
ERS7113462	21.42	1	0	Karachi	Pakistan	Asia	0	0	0	0	0	0	0	1	1	0	1	0	0	0	0	0	0	0	0	13.25	-2.75	0.241096	0	0	0	0	0	0	0	1	0	MS37	2021-06-03	149461	Bottle 4	NC37	14.0	0	0	1	138	4.8	3.14248
ERS7112979	13.11	2	1	Blantyre	Malawi	Africa	0	0	0	0	0	0	0	0	1	1	1	0	1	1	0	0	1	1	0	15.55	1.61	0.315068	1	0	0	0	0	0	0	0	0	MS27	2021-05-17	146354	Bottle 4	NC27	12.0	0	0	0	145	5.1	2.8443
ERS7113465	17.61	2	0	Karachi	Pakistan	Asia	0	0	1	0	0	0	0	0	1	1	1	0	0	1	0	0	1	1	1	14.5	-0.71	0.783562	1	0	0	0	0	0	0	0	0	MS37	2021-06-03	149461	Bottle 4	NC37	14.0	0	0	0	138	5.5	3.74955
ERS7112981	22.24	2	1	Blantyre	Malawi	Africa	0	0	0	0	0	0	0	0	1	0	0	1	0	0	0	1	0	1	0	13.8	-0.03	0.493088	1	0	0	0	0	0	0	0	0	MS27	2021-05-17	146354	Bottle 4	NC27	12.0	4	0	0	157	5.2	2.7445
ERS7113467	23.46	2	0	Karachi	Pakistan	Asia	1	0	0	0	0	0	0	1	1	0	0	0	0	0	0	1	1	0	0	12.05	-0.8	0.252055	0	0	0	0	0	0	1	0	0	MS37	2021-06-03	149461	Bottle 4	NC37	14.0	0	0	1	143	4.2	3.24961
ERS7112985	15.74	2	1	Blantyre	Malawi	Africa	0	0	0	0	0	0	0	0	1	0	0	0	1	0	0	0	0	0	0	13.95	0.59	0.493088	1	0	0	0	0	0	0	0	0	MS27	2021-05-17	146354	Bottle 4	NC27	12.0	0	0	0	143	4.4	2.66965
ERS7113469	18.43	1	1	Karachi	Pakistan	Asia	1	0	0	0	0	0	0	1	1	0	1	1	0	0	0	0	0	0	0	14.25	0.03	0.309589	1	0	0	0	0	0	0	0	1	MS37	2021-06-03	149461	Bottle 4	NC37	14.0	0	0	0	136	5.3	3.571
ERS7112875	9.63	2	0	Kampala	Uganda	Africa	0	0	0	0	0	0	0	0	1	1	0	0	1	1	1	0	0	0	0	14.5	-0.5	0.69589	0	0	0	1	0	0	0	0	0	MS25	2021-05-13	146534	Bottle 3	NC25	11.0	0	0	0	136	4.7	2.55
ERS7113471	10.64	2	1	Karachi	Pakistan	Asia	1	0	0	0	0	0	0	1	1	0	0	0	0	0	0	0	0	0	0	13.55	-0.55	0.375342	1	0	0	0	0	0	0	0	0	MS37	2021-06-03	149461	Bottle 4	NC37	14.0	0	0	0	137	5.1	3.60671
ERS7113473	10.18	1	0	Karachi	Pakistan	Asia	1	0	0	0	0	0	0	1	1	0	0	0	0	0	0	0	0	1	0	12.75	-1.62	0.378082	0	1	0	0	0	0	0	0	0	MS37	2021-06-03	149461	Bottle 4	NC37	14.0	0	0	0	140	5.3	3.53529
ERS7113481	11.47	2	0	Karachi	Pakistan	Asia	1	0	0	0	0	0	0	1	1	0	1	1	0	0	0	0	0	0	0	13	1.02	0.40274	1	0	0	0	0	0	0	0	1	MS38	2021-06-04	149461	Bottle 4	NC38	14.0	0	0	0	137	4.8	3.35674
ERS7113480	7.16	1	1	Karachi	Pakistan	Asia	1	0	0	0	0	0	0	0	0	0	0	0	0	0	0	0	0	0	0	13.05	-0.55	0.408219	1	0	0	0	0	0	0	0	0	MS38	2021-06-04	149461	Bottle 4	NC38	14.0	0	0	0	139	5.1	3.89239
ERS7112882	17.31	2	1	Kampala	Uganda	Africa	0	0	0	0	0	0	0	0	1	1	0	0	1	1	1	0	0	0	0	13.5	-0.33	0.775342	1	0	0	0	0	0	0	0	0	MS25	2021-05-13	146534	Bottle 3	NC25	11.0	0	0	0	135	4.8	2.45
ERS6283893	8.64	1	1	Banfora	Burkina Faso	Africa	0	0	0	0	0	0	0	0	1	0	0	0	0	0	0	0	1	0	0	14.5	1.09	0.764384	1	0	0	0	0	0	0	0	0	MS1	2021-04-06	120434	Bottle 1	NC1	3.0	0	0	0	143.6	5.3
ERS6283895	19.25	2	1	Banfora	Burkina Faso	Africa	0	0	0	0	0	0	0	0	1	0	0	0	0	1	1	0	1	1	0	13.15	-0.88	0.769863	1	0	0	0	0	0	0	0	0	MS1	2021-04-06	120434	Bottle 1	NC1	3.0	0	0	0	145	4.69	2.77
ERS6283897	4.07	1	1	Banfora	Burkina Faso	Africa	0	0	0	0	0	0	0	0	0	0	0	0	0	0	0	0	0	0	0	13	1.08	0.772603	1	0	0	0	0	0	0	0	0	MS1	2021-04-06	120434	Bottle 1	NC1	3.0	0	0	0	141.1	4.7	1.87
ERS6283898	18.76	1	1	Banfora	Burkina Faso	Africa	0	0	0	0	0	0	0	0	1	0	0	1	0	1	1	0	1	1	0	13.5	-1.27	0.810959	1	0	0	0	0	0	0	0	0	MS1	2021-04-06	120434	Bottle 1	NC1	3.0	0	0	0		4.4
ERS6283899	13.04	1	1	Banfora	Burkina Faso	Africa	0	0	0	0	0	0	0	0	1	0	0	0	1	0	0	0	1	0	0	14.4	-0.29	0.838356	1	0	0	0	0	0	0	0	0	MS1	2021-04-06	120434	Bottle 1	NC1	3.0	0	0	0	143.7	4.36	1.28
ERS6283902	5.49	2	1	Banfora	Burkina Faso	Africa	0	0	0	0	0	0	0	0	0	0	0	0	0	0	0	0	0	0	0	12.9	-0.18	0.90411	1	0	0	0	0	0	0	0	0	MS1	2021-04-06	120434	Bottle 1	NC1	3.0	0	0	0	141	4.9	2.39
ERS6283903	11.17	1	1	Banfora	Burkina Faso	Africa	0	0	0	0	0	0	0	0	1	0	0	0	0	1	0	0	1	1	0	13.5	-0.99	0.917808	1	0	0	0	0	0	0	0	0	MS1	2021-04-06	120434	Bottle 1	NC1	3.0	0	0	0	144	4.72	2.19
ERS6283904	5.49	2	1	Banfora	Burkina Faso	Africa	0	0	0	0	0	0	0	0	0	0	0	0	0	0	0	0	0	0	0	12	-0.27	0.923288	1	0	0	0	0	0	0	0	0	MS1	2021-04-06	120434	Bottle 1	NC1	3.0	0	0	0	144	5.36	2.18
ERS6283905	16.1	1	1	Banfora	Burkina Faso	Africa	0	0	0	0	0	0	0	0	1	0	0	1	0	1	1	1	1	1	0	15	-0.21	0.972603	0	0	0	0	0	0	0	1	0	MS1	2021-04-06	120434	Bottle 1	NC1	3.0	0	0	0	142	4.53	2.54
ERS6283906	22.63	2	1	Banfora	Burkina Faso	Africa	0	0	0	0	0	0	0	0	1	0	0	0	1	1	0	0	1	1	0	14	0.49	0.989041	1	0	0	0	0	0	0	0	0	MS1	2021-04-06	120434	Bottle 1	NC1	3.0	0	0	0	188	5.01	2.26
ERS6283907	7.79	1	1	Banfora	Burkina Faso	Africa	0	0	0	0	0	0	0	0	0	0	0	0	0	0	0	0	0	0	0	11.5	-2.63	0.0191781	0	0	0	0	0	0	0	0	0	MS1	2021-04-06	120434	Bottle 1	NC1	3.0	0	0	0	127	4.21	2.42
ERS6382629	12.42	1	1	Blantyre	Malawi	Africa	0	0	0	0	0	0	0	0	1	0	1	0	0	0	0	0	1	1	0	13.35	0.06	0.315068	1	0	0	0	0	0	0	0	0	ND3	2021-04-15	141325	B1_12.Apr	NCC	9.0	0	0	0	143	4.7	2.61
ERS6387435	11.99	2	1	Kilifi	Kenya	Africa	0	0	0	0	0	0	0	0	1	0	1	1	0	0	0	0	0	0	0	13.1	-0.54	0.931507	1	0	0	0	0	0	0	0	2	ND6	2021-04-20	141325	B1_12.Apr	NCF	10.0	0	0	0	132	4.2	2.57
ERS6387453	2.33	1	1	Kilifi	Kenya	Africa	0	0	0	0	0	0	0	0	0	0	0	0	0	0	0	0	0	0	0	12.6	-0.47	0.446575	1	0	0	0	0	0	0	0	0	ND7	2021-04-21	146452	B1_12.Apr	NCG	10.0	0	0	0	136	4.5	2.23
ERS6387460	4.17	2	1	Kilifi	Kenya	Africa	0	0	0	0	0	0	0	0	0	0	0	0	0	0	0	0	0	0	0	13.3	0.29	0.50137	1	0	0	0	0	0	0	0	0	ND7	2021-04-21	146452	B1_12.Apr	NCG	10.0	0	0	0	135	4.5	2.36
ERS6387461	12.06	1	1	Kilifi	Kenya	Africa	0	0	0	0	0	0	0	0	1	0	1	0	1	0	0	0	0	0	0	12.15	-2.62	0.564384	0	0	0	0	0	0	1	0	0	ND7	2021-04-21	146452	B1_12.Apr	NCG	10.0	0	0	0	134	2.6	2.05
ERS6344222	4.6	2	1	Mbagathi	Kenya	Africa	0	0	0	0	0	0	0	0	0	0	0	0	0	0	0	0	0	0	0	15.4	1.68	0.123288	0	1	0	0	0	0	0	1	0	MS16	2012-04-29	146092	Bottle 2	NC16	2.0	0	0	0
ERS6283875	11.2	1	1	Banfora	Burkina Faso	Africa	0	0	0	0	0	0	0	1	1	0	0	1	0	0	0	0	1	1	0	14.6	1.86	0.29589	1	0	0	0	0	0	0	0	0	MS1	2021-04-06	120434	Bottle 1	NC1	3.0	0	0	0
ERS6283876	3.61	2	1	Banfora	Burkina Faso	Africa	0	0	0	0	0	0	0	0	0	0	0	0	0	0	0	0	0	0	0	12.05	-1.48	0.347945	1	0	0	0	0	0	0	0	0	MS1	2021-04-06	120434	Bottle 1	NC1	3.0	0	0	0	129.7	4.1	2.37
ERS6283879	16.1	2	0	Banfora	Burkina Faso	Africa	0	0	0	0	0	0	0	0	1	0	0	0	0	0	0	1	0	1	0	14.25	-0.65	0.405479	1	0	0	0	0	0	0	0	0	MS1	2021-04-06	120434	Bottle 1	NC1	3.0	0	0	0	137.5	3.98	2.32
ERS6283882	2.56	2	1	Banfora	Burkina Faso	Africa	0	0	0	0	0	0	0	0	0	0	0	0	0	0	0	0	0	0	0	14	1.14	0.545205	1	0	0	0	0	0	0	0	0	MS1	2021-04-06	120434	Bottle 1	NC1	3.0	0	0	0	136.6	7.45	2.02
ERS6283884	5.65	2	1	Banfora	Burkina Faso	Africa	0	0	0	0	0	0	0	0	0	0	0	0	0	0	0	0	0	0	0	12.5	-0.42	0.564384	1	0	0	0	0	0	0	0	0	MS1	2021-04-06	120434	Bottle 1	NC1	3.0	0	0	0	142.6	4.87	2.35
ERS6283886	8.11	2	1	Banfora	Burkina Faso	Africa	0	0	0	0	0	0	0	0	1	0	0	0	0	1	0	0	1	1	0	12.4	-1.15	0.679452	1	0	0	0	0	0	0	0	0	MS1	2021-04-06	120434	Bottle 1	NC1	3.0	0	0	0	143.4	4.88	1.99
ERS6283887	14.29	2	1	Banfora	Burkina Faso	Africa	0	0	0	0	0	0	0	0	1	0	0	0	0	1	1	0	0	1	0	14	-0.44	0.693151	1	0	0	0	0	0	0	0	0	MS1	2021-04-06	120434	Bottle 1	NC1	3.0	0	0	0	146	4.38	2.41
ERS6283888	22.6	2	0	Banfora	Burkina Faso	Africa	0	0	0	0	0	0	0	1	1	0	0	0	0	1	1	0	1	1	0	14.75	-0.3	0.736986	1	0	0	0	0	0	0	0	0	MS1	2021-04-06	120434	Bottle 1	NC1	3.0	0	0	0	144.9	3.98	2.19
ERS6283889	23.55	2	0	Banfora	Burkina Faso	Africa	0	0	0	0	0	0	0	1	1	0	0	0	0	1	1	0	1	1	0	17.15	2.14	0.736986	1	0	0	0	0	0	0	0	0	MS1	2021-04-06	120434	Bottle 1	NC1	3.0	0	0	0	142.8	4.09	2.56
ERS6382643	18.5	2	0	Banfora	Burkina Faso	Africa	0	0	0	0	0	0	0	1	1	0	0	0	0	0	0	0	0	0	0	14.5	0.46	0.317808	1	0	0	0	0	0	0	0	0	ND3	2021-04-15	141325	B1_12.Apr	NCC	9.0	0	0	0	144.6	4.24	2.4
ERS6288610	17.64	2	1	Kilifi	Kenya	Africa	0	0	0	0	0	0	0	1	1	0	1	0	1	0	0	0	1	0	0	14.05	-0.95	0.567123	1	0	0	0	0	0	0	0	0	MS5	2021-04-13	123852	Bottle 1	NC5	4.0		0	0
ERS6288621	13.86	2	1	Mbagathi	Kenya	Africa	0	0	0	0	0	0	0	1	1	1	1	1	1	1	1	1	1	1	0	14.3	0.1	0.273973	1	0	0	0	0	0	0	0	0	MS6	2021-04-14	123582	Bottle 1	NC6	4.0	0	0	0	144	4.2	2.03
ERS6382664	11.4	1	1	Blantyre	Malawi	Africa	0	0	0	0	0	0	0	0	0	0	0	0	0	0	0	0	0	0	0	15.25	1.45	0.493088	1	0	0	0	0	0	0	0	0	ND3	2021-04-15	141325	B1_12.Apr	NCC	9.0	0	0	0	157	6	2.59
ERS6382665	11.66	2	1	Blantyre	Malawi	Africa	0	0	0	0	0	0	0	0	1	0	1	0	1	0	0	0	1	1	0	16.05	1.23	0.723288	0	0	0	0	0	0	0	1	0	ND3	2021-04-15	141325	B1_12.Apr	NCC	9.0	0	0	0	137	4.5	2.5
ERS6382622	7.03	2	1	Blantyre	Malawi	Africa	0	0	0	0	0	0	0	0	1	0	0	0	0	0	0	0	0	1	0	15.85	2.14	0.106849	1	0	0	0	0	0	0	0	0	ND3	2021-04-15	141325	B1_12.Apr	NCC	9.0	0	0	0
ERS6382623	23.29	1	0	Blantyre	Malawi	Africa	0	0	0	0	0	0	0	0	1	0	0	0	0	1	0	0	1	1	0	13.55	-1.29	0.145205	0	1	0	0	0	0	0	0	0	ND3	2021-04-15	141325	B1_12.Apr	NCC	9.0	0	0	0	144	23.6	0.2
ERS6382625	11.01	1	1	Blantyre	Malawi	Africa	0	0	0	0	0	0	0	0	1	0	1	1	0	0	0	0	1	1	0	14.05	0.04	0.161644	0	1	0	0	0	0	0	1	0	ND3	2021-04-15	141325	B1_12.Apr	NCC	9.0	4	0	1	141	5.1	2.63
ERS6382627	21.52	2	1	Blantyre	Malawi	Africa	0	0	0	0	0	0	0	0	1	0	0	1	0	0	0	0	0	1	0	13.45	-1.03	0.273973	1	0	0	0	0	0	0	0	0	ND3	2021-04-15	141325	B1_12.Apr	NCC	9.0	0	0	0	145	4.7
ERS6382630	16.1	1	1	Blantyre	Malawi	Africa	0	0	0	0	0	0	0	0	1	0	1	0	0	0	0	0	1	1	0	15.7	0.13	0.493088	1	0	0	0	0	0	0	0	0	ND3	2021-04-15	141325	B1_12.Apr	NCC	9.0	0	0	0	144	4.4	2.39
ERS6382632	6.04	2	1	Blantyre	Malawi	Africa	0	0	0	0	0	0	0	1	1	0	0	0	0	0	0	0	0	0	0	14.65	1.43	0.564384	1	0	0	0	0	0	0	0	0	ND3	2021-04-15	141325	B1_12.Apr	NCC	9.0	4	0	0			5.5
ERS6382634	12.45	1	1	Banfora	Burkina Faso	Africa	0	0	0	0	0	0	0	0	1	0	0	0	0	0	0	0	0	0	0	12.9	-1.46	0.794521	1	0	0	0	0	0	0	0	2	ND3	2021-04-15	141325	B1_12.Apr	NCC	9.0	0	0	0	144.9	3.57	1.93
ERS6382636	8.05	1	1	Banfora	Burkina Faso	Africa	0	0	0	0	0	0	0	0	1	0	0	0	0	0	0	0	0	0	0	13.25	-0.65	0.186301	1	0	0	0	0	0	0	0	0	ND3	2021-04-15	141325	B1_12.Apr	NCC	9.0	0	0	0	150	4.98	2.51
ERS6382638	3.29	2	1	Banfora	Burkina Faso	Africa	0	0	0	0	0	0	0	0	0	0	0	0	0	0	0	0	0	0	0	11.9	-0.69	0.20274	1	0	0	0	0	0	0	0	0	ND3	2021-04-15	141325	B1_12.Apr	NCC	9.0	0	0	0	146		2.67
ERS6382639	14.06	1	1	Banfora	Burkina Faso	Africa	0	0	0	0	0	0	0	0	1	0	0	0	0	0	0	0	0	0	0	13.95	-1.03	0.230137	1	0	0	0	0	0	0	0	0	ND3	2021-04-15	141325	B1_12.Apr	NCC	9.0	0	0	1	145	3.48	2.14
ERS6382640	22.31	1	1	Banfora	Burkina Faso	Africa	0	0	0	0	0	0	0	0	1	0	1	0	0	0	0	1	0	1	0	14	-0.29	0.29863	1	0	0	0	0	0	0	0	0	ND3	2021-04-15	141325	B1_12.Apr	NCC	9.0	0	0	0	138.2	3.84	2.34
ERS6387432	8.77	1	1	Kilifi	Kenya	Africa	0	0	0	0	0	0	0	0	1	0	0	0	0	0	0	0	0	0	0	12.8	-0.96	0.621918	1	0	0	0	0	0	0	0	0	ND6	2021-04-20	141325	B1_12.Apr	NCF	10.0	0	0	0
ERS6387433	7.03	1	1	Kilifi	Kenya	Africa	0	0	0	0	0	0	0	0	1	0	0	1	0	0	0	0	0	0	0	14.3	0.76	0.715068	1	0	0	0	0	0	0	0	0	ND6	2021-04-20	141325	B1_12.Apr	NCF	10.0	0	0	0	134	3.5	2.5
ERS6386388	15.93	1	1	Mbagathi	Kenya	Africa	0	0	0	0	0	0	0	1	1	1	1	1	1	1	1	1	1	1	0	14.55	-0.35	0.158904	0	0	0	0	0	0	0	1	0	MS16	2012-04-29	146092	Bottle 2	NC16	2.0	0	0	0
ERS6386404	21.29	2	1	Banfora	Burkina Faso	Africa	0	0	0	0	0	0	0	0	0	0	0	0	0	1	0	0	0	1	0	14.15	-1.25	0.117808	1	0	0	0	0	0	0	0	2	MS17	2021-04-30	146092	Bottle 2	NC17	2.0	0	0	0
ERS6387434	10.38	2	1	Kilifi	Kenya	Africa	0	0	0	0	0	0	0	0	1	0	1	1	0	0	0	0	0	0	0	13.25	-1.22	0.928767	1	0	0	0	0	0	0	0	0	ND6	2021-04-20	141325	B1_12.Apr	NCF	10.0	0	0	0
ERS6386426	19.88	1	1	Mbagathi	Kenya	Africa	0	0	0	0	0	0	0	1	1	1	1	1	0	1	1	0	1	0	0	14.15	-1.06	0.435616	0	1	0	0	1	0	0	0	0	MS18	2021-05-04	146092	Bottle 3	NC18	5.0	0	0	0
ERS6387667	13.01	2	1	Blantyre	Malawi	Africa	0	0	0	0	0	0	0	0	1	0	1	0	0	1	0	0	1	1	0	15.25	0.37	0.536986	1	0	0	0	0	0	0	0	0	ND11	2021-04-27	146092	B2_14.Apr	NCK	6.0	0	0	0	140	5.1	2.56985
ERS6386427	16.13	2	1	Mbagathi	Kenya	Africa	0	0	0	0	0	0	0	1	1	1	1	1	1	1	0	1	1	1	1	13.7	-0.2	0.465753	1	0	0	0	0	0	0	0	0	MS18	2021-05-04	146092	Bottle 3	NC18	5.0	0	0	0
ERS6387436	6.87	1	1	Kilifi	Kenya	Africa	0	0	0	0	0	0	0	0	1	0	0	0	0	0	0	0	0	1	0	12.55	-1.67	0.945205	1	0	0	0	0	0	0	0	0	ND6	2021-04-20	141325	B1_12.Apr	NCF	10.0	0	0	0	135	4.1	2.35
ERS6387437	12.25	1	1	Kilifi	Kenya	Africa	0	1	0	0	0	0	0	0	1	0	1	0	1	0	0	0	0	1	0	14.4	-0.52	0.967123	1	0	0	0	0	0	0	0	0	ND6	2021-04-20	141325	B1_12.Apr	NCF	10.0		0	0	133	4.2	2.45
ERS6387438	20.2	1	1	Kilifi	Kenya	Africa	0	0	0	0	0	0	0	0	1	0	1	1	0	0	0	0	0	0	0	13.4	-2.37	0.0219178	0	0	0	0	0	0	0	1	0	ND6	2021-04-20	141325	B1_12.Apr	NCF	10.0	0	0	0	132	3.7	2.51
ERS6387439	22.96	2	0	Kilifi	Kenya	Africa	0	0	0	0	0	0	0	0	1	0	1	0	1	0	0	0	0	1	0	12.2	-1.87	0.0219178	0	0	0	0	0	0	0	1	0	ND6	2021-04-20	141325	B1_12.Apr	NCF	10.0	0	0	0	131	3.5	2.16
ERS6387441	15.05	2	1	Kilifi	Kenya	Africa	0	0	0	0	0	1	0	0	1	0	1	1	0	0	0	0	1	0	0	12.55	-1.71	0.030137	1	0	0	0	0	0	0	0	0	ND6	2021-04-20	141325	B1_12.Apr	NCF	10.0	0	0	0	134	4.2	2.48
ERS6387442	2.73	2	1	Kilifi	Kenya	Africa	0	0	0	0	0	0	0	0	0	0	0	0	0	0	0	0	0	0	0	12.5	0.86	0.0273973	0	0	0	0	0	0	0	1	0	ND6	2021-04-20	141325	B1_12.Apr	NCF	10.0	0	0	0	134	4.6	2.58
ERS6387443	18.63	2	0	Kilifi	Kenya	Africa	0	0	0	0	0	0	0	1	1	0	1	0	0	0	0	0	0	0	0	12.95	-1.54	0.0383562	0	0	1	0	0	0	0	0	0	ND6	2021-04-20	141325	B1_12.Apr	NCF	10.0	0	0	0	134	3.7	2.2
ERS6387445	13.83	2	1	Kilifi	Kenya	Africa	0	0	0	0	0	0	0	1	1	0	1	1	0	1	1	0	0	0	0	14.35	-0.42	0.0410959	0	0	0	0	0	0	0	1	2	ND7	2021-04-21	146452	B1_12.Apr	NCG	10.0	0	0	0	131	4.1	2.47
ERS6387446	19.84	2	1	Kilifi	Kenya	Africa	0	0	0	0	0	0	0	1	1	0	1	1	0	1	0	0	0	0	0	13.1	0.13	0.0410959	1	0	0	0	0	0	0	0	0	ND7	2021-04-21	146452	B1_12.Apr	NCG	10.0	0	0	0	135	3.9	2.71
ERS6387447	22.83	1	0	Kilifi	Kenya	Africa	0	0	0	0	0	0	0	0	1	0	1	0	0	0	0	0	0	0	0	12	-2.07	0.0575342	1	0	0	0	0	0	0	0	0	ND7	2021-04-21	146452	B1_12.Apr	NCG	10.0	0	0	0	132	3.8	2.32
ERS6387448	11.3	2	1	Kilifi	Kenya	Africa	0	0	0	0	0	0	0	0	1	0	0	0	0	0	0	0	0	0	0	13.2	-1.09	0.145205	0	1	0	0	0	0	0	0	0	ND7	2021-04-21	146452	B1_12.Apr	NCG	10.0		0	0	134	3.9	2.27
ERS6387449	12.25	1	1	Kilifi	Kenya	Africa	0	0	0	0	0	0	0	0	1	1	1	0	0	0	0	0	1	0	0	13.5	-1.89	0.156164	0	0	0	0	0	0	1	0	0	ND7	2021-04-21	146452	B1_12.Apr	NCG	10.0	0	0	0	132	3.9	2.36
ERS6387450	12.61	1	1	Kilifi	Kenya	Africa	0	0	0	0	0	0	0	0	1	0	1	1	0	0	0	0	1	1	0	12.8	-2.15	0.446575	1	0	0	0	0	0	0	0	0	ND7	2021-04-21	146452	B1_12.Apr	NCG	10.0	0	0	0	133	4.6	2.23
ERS6387451	17.84	2	1	Kilifi	Kenya	Africa	0	0	0	0	0	0	0	0	1	0	1	1	0	0	0	0	1	1	0	14.2	-0.61	0.446575	1	0	0	0	0	0	0	0	0	ND7	2021-04-21	146452	B1_12.Apr	NCG	10.0	0	0	0	138	4.4	2.17
ERS6387452	18.86	1	1	Kilifi	Kenya	Africa	0	0	0	0	0	0	0	0	1	0	1	1	0	0	0	0	1	1	0	15.95	0.62	0.446575	1	0	0	0	0	0	0	0	0	ND7	2021-04-21	146452	B1_12.Apr	NCG	10.0	0	0	0	136	3.7	2.07
ERS6387454	7.36	1	1	Kilifi	Kenya	Africa	0	0	0	0	0	0	0	0	1	0	0	0	0	0	0	0	0	0	0	14.95	1.09	0.452055	1	0	0	0	0	0	0	0	0	ND7	2021-04-21	146452	B1_12.Apr	NCG	10.0	0	0	0	135	4.4	2.38
ERS6387455	6.6	2	1	Kilifi	Kenya	Africa	0	0	0	0	0	0	0	0	1	0	1	1	0	0	0	0	1	1	0	12.45	-0.44	0.452055	0	0	0	0	0	0	0	0	0	ND7	2021-04-21	146452	B1_12.Apr	NCG	10.0	0	0	0	140	4.8	2.32
ERS6387456	15.67	1	1	Kilifi	Kenya	Africa	0	0	0	0	0	0	0	0	1	0	0	1	0	0	0	0	0	0	0	13.65	-1.5	0.463014	1	0	0	0	0	0	0	0	0	ND7	2021-04-21	146452	B1_12.Apr	NCG	10.0	0	0	0	133	4.4	2.23
ERS6387457	10.22	1	1	Kilifi	Kenya	Africa	0	0	0	0	0	0	0	0	1	0	0	0	0	0	0	0	1	0	0	14.6	-0.64	0.463014	1	0	0	0	0	0	0	0	0	ND7	2021-04-21	146452	B1_12.Apr	NCG	10.0	0	0	0	137	3.7	2.21
ERS6387458	8.02	2	1	Kilifi	Kenya	Africa	0	0	0	0	0	0	0	0	1	0	0	1	0	0	0	0	0	0	0	13.3	0.09	0.482192	1	0	0	0	0	0	0	0	0	ND7	2021-04-21	146452	B1_12.Apr	NCG	10.0	0	0	0	133	4.2	2.42
ERS6387459	21.88	1	0	Kilifi	Kenya	Africa	0	0	0	0	0	0	0	1	1	1	0	1	0	1	0	1	0	0	0	13.55	-1.38	0.482192	1	0	0	0	0	0	0	0	0	ND7	2021-04-21	146452	B1_12.Apr	NCG	10.0	0	0	0	132	4.2	2.07
ERS6387431	7	1	0	Kilifi	Kenya	Africa	0	0	0	0	0	0	0	1	1	0	1	1	0	0	0	0	0	0	0	13.25	-1.76	0.586301	0	1	0	0	0	1	0	0	0	ND6	2021-04-20	141325	B1_12.Apr	NCF	10.0	0	0	0
ERS7112869	20.14	2	0	Kampala	Uganda	Africa	0	0	0	0	0	0	0	0	1	0	0	0	1	1	0	1	0	0	0	15.6	1.08	0.624658	0	0	0	0	1	0	0	0	0	MS25	2021-05-13	146534	Bottle 3	NC25	11.0	0	0	0	136	4.8	2.41
ERS7112887	2.53	1	1	Kampala	Uganda	Africa	0	0	0	0	0	0	0	0	0	0	0	0	0	0	0	0	0	0	0	14.5	1.96	0.816438	0	0	0	0	0	0	0	1	0	MS25	2021-05-13	146534	Bottle 3	NC25	12.0	0	0	0	132	5.1	2.68
ERS7112889	9.82	1	1	Kampala	Uganda	Africa	0	0	0	0	0	0	0	0	1	1	1	1	1	1	0	1	0	1	0	11.55	-1.18	0.827397	0	1	0	0	0	0	0	0	0	MS25	2021-05-13	146534	Bottle 3	NC25	12.0	0	0	0	130	4.3	1.95
ERS7112891	22.01	1	0	Kampala	Uganda	Africa	0	0	0	0	0	0	0	1	1	1	0	0	1	0	0	0	0	0	0	14.2	-0.48	0.893151	1	0	0	0	0	0	0	0	0	MS25	2021-05-13	146534	Bottle 3	NC25	12.0	0	0	0	145	5.18	2.53
ERS7112863	3.94	2	1	Kampala	Uganda	Africa	0	1	0	0	0	0	0	0	0	0	0	0	0	0	0	0	0	0	0	13	-1.23	0.030137	0	1	0	0	0	0	0	0	0	MS25	2021-05-13	146534	Bottle 3	NC25	11.0	3	0	0	136	4.4	2.5
ERS7112877	18.2	2	1	Kampala	Uganda	Africa	0	0	0	0	0	0	0	0	1	1	1	0	1	0	1	0	0	0	0	13.25	-1.41	0.69863	1	0	0	0	0	0	0	0	0	MS25	2021-05-13	146534	Bottle 3	NC25	11.0	0	0	0	138	4.5	2.51
ERS7112879	2.96	1	1	Kampala	Uganda	Africa	0	0	0	0	0	0	0	0	0	0	0	0	0	0	0	0	0	0	0	12	-0.01	0.736986	0	0	0	0	0	0	1	0	0	MS25	2021-05-13	146534	Bottle 3	NC25	11.0	0	0	0	135	5.9	2.8
ERS7112962	8.25	1	1	Blantyre	Malawi	Africa	0	0	0	0	0	0	0	0	1	0	0	0	1	0	0	1	1	1	0	13.65	-1.11	0.20274	0	0	0	0	0	0	0	1	1	MS27	2021-05-17	146354	Bottle 4	NC27	12.0	0	0	0	142	4.5	2.51995
ERS7112963	7.72	2	1	Blantyre	Malawi	Africa	0	0	0	0	0	0	0	0	1	0	0	0	0	1	0	0	1	1	0	14.3	1.44	0.493088	1	0	0	0	0	0	0	0	0	MS27	2021-05-17	146354	Bottle 4	NC27	12.0	0	0	0	141	4.9	2.5449
ERS7112984	14.39	2	1	Blantyre	Malawi	Africa	0	0	0	0	0	0	0	0	1	0	1	0	0	0	0	0	0	0	0	16.2	2.22	0.493088	1	0	0	0	0	0	0	0	0	MS27	2021-05-17	146354	Bottle 4	NC27	12.0	0	0	0	157	5.8	3.1437
ERS7112883	5.88	2	1	Kampala	Uganda	Africa	0	1	0	0	0	0	0	1	1	1	0	0	1	0	0	0	0	0	0	13.5	0.64	0.79726	1	0	0	0	0	0	0	0	0	MS25	2021-05-13	146534	Bottle 3	NC25	11.0	0	0	0	134	4.8	2.7
ERS7112886	8.67	2	1	Kampala	Uganda	Africa	0	0	0	0	0	0	0	1	1	1	1	1	1	1	0	1	0	1	0	14	0.27	0.813699	1	0	0	0	0	0	0	0	0	MS25	2021-05-13	146534	Bottle 3	NC25	12.0	0	0	0	131	4.4	2.52
ERS7113381	13.3	1	1	Karachi	Pakistan	Asia	0	0	1	0	0	0	0	1	1	1	1	1	1	0	0	1	0	1	1	12.55	0.32	0.145205	1	0	0	0	0	0	0	0	0	MS36	2021-06-02	149461	Bottle 4	NC36	14.0	0	0	0	145	5.1	3.571
ERS7113387	7.98	1	1	Karachi	Pakistan	Asia	0	0	0	0	0	0	0	1	0	0	1	0	0	0	0	1	0	0	0	11.9	-2.41	0.00547945	0	1	0	0	0	0	0	0	0	MS36	2021-06-02	149461	Bottle 4	NC36	14.0	0	0	1	140	4.2	3.46387
ERS7113388	15.11	2	1	Karachi	Pakistan	Asia	0	0	0	0	0	0	0	0	0	0	0	0	0	0	0	1	0	0	1	12.45	-2.55	0.70137	1	0	0	0	0	0	0	0	0	MS36	2021-06-02	149461	Bottle 4	NC36	14.0	0	0	0	140	4.4	3.49958
ERS7113392	2.3	1	1	Karachi	Pakistan	Asia	1	0	0	0	0	0	0	0	1	1	0	0	0	0	0	0	1	1	0	11.95	-0.83	0.00821918	1	0	0	0	0	0	0	0	0	MS36	2021-06-02	149461	Bottle 4	NC36	14.0	0	0	0	146	3.9	3.64242
ERS7113394	20.73	1	0	Karachi	Pakistan	Asia	1	0	0	0	0	0	0	1	1	1	1	1	1	1	1	1	1	1	1	14.55	-0.99	0.183562	0	0	0	0	0	0	0	1	0	MS36	2021-06-02	149461	Bottle 4	NC36	14.0	0	0	0	141	4.2	3.32103
ERS7113397	2.4	1	1	Karachi	Pakistan	Asia	0	0	1	0	0	0	0	0	0	0	0	0	0	0	0	0	0	0	0	13.25	2.04	0.213699	0	0	0	0	0	0	0	1	0	MS36	2021-06-02	149461	Bottle 4	NC36	14.0	0	0	0	142	5.2	3.60671
ERS7113399	13.83	1	1	Karachi	Pakistan	Asia	0	0	0	0	0	0	0	0	1	0	1	0	0	1	0	1	0	1	1	13.25	-0.99	0.356164	0	0	0	0	0	0	0	1	0	MS36	2021-06-02	149461	Bottle 4	NC36	14.0	0	0	0	142	4.4	3.32103
ERS7113403	9.99	1	1	Karachi	Pakistan	Asia	1	0	0	0	0	0	0	0	1	0	0	1	1	0	0	1	1	1	1	13.65	-0.88	0.572603	1	0	0	0	0	0	0	0	0	MS36	2021-06-02	149461	Bottle 4	NC36	14.0	0	0	0	137	3.8	3.24961
ERS7113411	11.24	1	1	Karachi	Pakistan	Asia	0	0	0	0	1	0	0	1	0	0	0	1	0	0	0	1	0	0	0	15.3	-0.83	0.687671	1	0	0	0	0	0	0	0	0	MS36	2021-06-02	149461	Bottle 4	NC36	14.0	0	0	0	141	5.5	3.74955
ERS7113421	23.16	2	1	Karachi	Pakistan	Asia	0	0	1	0	0	0	0	1	1	1	1	1	1	1	1	1	1	1	1	11.55	-1.94	0.860274	1	0	0	0	0	0	0	0	0	MS36	2021-06-02	149461	Bottle 4	NC36	14.0	0	0	0	138	4.7	3.42816
ERS7113423	8.9	1	0	Karachi	Pakistan	Asia	0	0	0	0	0	0	0	1	1	0	0	1	0	0	0	1	0	1	0	14.45	0.51	0.876712	1	0	0	0	0	0	0	0	0	MS36	2021-06-02	149461	Bottle 4	NC36	14.0	0	0	0	140	4.1	3.42816
ERS7113431	18.5	1	0	Karachi	Pakistan	Asia	0	0	1	0	0	0	0	1	1	1	1	1	1	0	1	1	1	1	1	13.55	-0.45	0.0876712	0	0	0	0	0	0	0	1	0	MS37	2021-06-03	149461	Bottle 4	NC37	14.0	0	0	0	132	4.5	3.46387
ERS7113433	8.18	2	1	Karachi	Pakistan	Asia	0	0	0	0	0	0	0	1	0	0	0	1	0	0	0	0	0	1	0	13.45	0.09	0.090411	1	0	0	0	0	0	0	0	0	MS37	2021-06-03	149461	Bottle 4	NC37	14.0	0	0	0	136	4.9	3.53529
ERS7113435	8.8	1	0	Karachi	Pakistan	Asia	0	0	1	0	0	0	0	1	1	1	0	0	1	0	0	0	1	1	0	12.45	-0.26	0.106849	0	0	0	0	0	0	1	0	0	MS37	2021-06-03	149461	Bottle 4	NC37	14.0	0	0	0	138	5.1	3.78526
ERS7113437	13.27	2	1	Karachi	Pakistan	Asia	1	0	0	0	0	0	0	0	1	1	1	1	1	1	1	1	1	1	1	12.3	-1.74	0.69589	1	0	0	0	0	0	0	0	0	MS37	2021-06-03	149461	Bottle 4	NC37	14.0	0	0	1	137	5.1	3.46387
ERS7113438	18.23	2	1	Karachi	Pakistan	Asia	1	0	0	0	0	0	0	1	0	0	0	1	0	0	0	0	0	1	0	12.55	-2.93	0.120548	0	1	0	0	0	0	0	0	0	MS37	2021-06-03	149461	Bottle 4	NC37	14.0	0	0	0	142	5.1	3.60671
ERS7113443	17.9	1	0	Karachi	Pakistan	Asia	0	0	1	0	0	0	0	1	1	0	1	1	0	0	0	0	0	0	0	13.55	-0.41	0.134247	0	1	0	0	0	0	0	0	0	MS37	2021-06-03	149461	Bottle 4	NC37	14.0	0	0	0	138	4.9	3.53529
ERS7113445	4.14	1	1	Karachi	Pakistan	Asia	1	0	0	0	0	0	0	1	0	0	0	0	0	0	0	0	0	0	0	11.85	-0.95	0.145205	0	1	0	0	0	0	0	0	0	MS37	2021-06-03	149461	Bottle 4	NC37	14.0	0	0	1	144	4.2	3.64242
ERS7113448	6.8	2	1	Karachi	Pakistan	Asia	1	0	0	0	0	0	0	0	0	0	0	0	0	0	0	0	0	0	0	15.35	1.6	0.167123	1	0	0	0	0	0	0	0	0	MS37	2021-06-03	149461	Bottle 4	NC37	14.0	0	0	0	138	5	3.571
ERS7113451	7.19	2	1	Karachi	Pakistan	Asia	1	0	0	0	0	0	0	1	0	0	0	0	0	0	0	0	0	0	0	13.45	0.04	0.183562	1	0	0	0	0	0	0	0	0	MS37	2021-06-03	149461	Bottle 4	NC37	14.0	0	0	0	137	5.2	3.46387
ERS7113464	21.12	1	1	Karachi	Pakistan	Asia	1	0	0	0	0	0	0	0	1	0	1	1	0	0	0	1	0	1	1	13.1	-1.56	0.243836	0	0	0	0	0	0	1	0	0	MS37	2021-06-03	149461	Bottle 4	NC37	14.0	0	0	1	137	4.2	3.49958
ERS7113476	7.36	1	1	Karachi	Pakistan	Asia	1	0	0	0	0	0	0	1	1	0	0	0	0	0	0	0	0	0	0	12.55	-0.84	0.40274	1	0	0	0	0	0	0	0	0	MS38	2021-06-04	149461	Bottle 4	NC38	14.0	0	0	1	139	5.1	3.64242
ERS7115022	5.35	2	1	Matlab	Bangladesh	Asia	1	0	0	0	0	0	0	0	0	0	0	0	0	0	0	0	0	0	0	13.45	-0.55	0.161644	1	0	0	0	0	0	0	0	0	ND35	2021-06-09	149461	Kit PBS	NCI2	19.0	0	0	1	134.7	5.33	2.71
ERS7112865	12.68	2	1	Kampala	Uganda	Africa	0	0	0	0	0	0	0	1	1	0	0	0	1	0	1	0	0	0	0	14.3	0.12	0.493088	0	0	0	1	0	0	0	0	0	MS25	2021-05-13	146534	Bottle 3	NC25	11.0	0	0	0
ERS7114977	7.1	1	1	Matlab	Bangladesh	Asia	0	0	0	0	0	0	0	1	1	1	1	1	1	1	1	1	1	1	1	13.35	-0.36	0.180822	0	0	0	0	0	0	0	1	0	ND34	2021-06-08	149461	Kit PBS	NCH2	19.0	0	0	1
ERS7114984	6.93	1	1	Matlab	Bangladesh	Asia	0	0	0	0	0	0	0	1	1	1	1	1	1	1	0	1	0	0	0	14.15	-0.05	0.323288	0	1	0	0	0	1	0	1	0	ND35	2021-06-09	149461	Kit PBS	NCI2	19.0	0	0	1
ERS7115001	12.32	1	1	Matlab	Bangladesh	Asia	0	0	0	0	0	0	0	0	1	1	1	1	1	1	1	1	1	1	1	12.85	-1.16	0.69589	1	0	0	0	0	0	0	0	0	ND35	2021-06-09	149461	Kit PBS	NCI2	19.0	0	0	0
ERS7115008	21.39	1	1	Matlab	Bangladesh	Asia	0	0	0	0	0	0	0	1	1	1	1	1	1	1	1	1	1	1	1	14.85	0.29	0.791781	0	0	0	0	0	0	0	1	3	ND35	2021-06-09	149461	Kit PBS	NCI2	19.0	0	0	1	135.38	3.64	2.31
ERS7115010	17.77	1	1	Matlab	Bangladesh	Asia	0	0	0	0	0	0	0	0	1	1	1	1	1	1	1	1	1	0	1	15.25	0.34	0.791781	0	0	0	0	0	0	0	1	3	ND35	2021-06-09	149461	Kit PBS	NCI2	19.0	0	0	0	134.98	4.6	2.58
ERS7114973	20.8	1	1	Matlab	Bangladesh	Asia	0	0	0	0	0	0	0	0	1	1	1	1	1	1	1	1	1	1	1	14.55	0.23	0.0219178	0	0	0	0	0	0	0	1	0	ND35	2021-06-09	149461	Kit PBS	NCI2	19.0	0	0	0	140.5	3.66	2.55
ERS7114600	7.36	1	1	Dhaka	Bangladesh	Asia	0	0	0	0	0	0	0	1	1	1	1	1	0	1	0	0	1	1	0	13.3	-0.8	0.334247	0	0	0	0	0	1	0	0	1	ND27	2021-05-21	149461	Kit PBS	NCA2	17.0	0	0	1
ERS7114602	13.86	1	1	Dhaka	Bangladesh	Asia	0	1	0	0	0	0	0	0	1	1	1	1	1	0	0	0	1	0	1	15.45	0.24	0.358904	1	0	0	0	0	0	0	0	0	ND27	2021-05-21	149461	Kit PBS	NCA2	17.0	0	0	0
ERS7114618	9.03	2	1	Dhaka	Bangladesh	Asia	0	1	0	0	0	0	0	1	1	0	0	0	0	0	0	0	0	1	0	12.5	-1.06	0.347945	1	0	0	0	0	0	0	0	0	ND27	2021-05-21	149461	Kit PBS	NCA2	17.0	0	0	1
ERS7114622	5.26	2	1	Dhaka	Bangladesh	Asia	0	1	0	0	0	0	0	1	0	0	0	0	0	0	0	0	0	1	0	13.3	0.28	0.410959	1	0	0	0	0	0	0	0	0	ND27	2021-05-21	149461	Kit PBS	NCA2	17.0	0	0	1
ERS7114624	6.31	1	1	Dhaka	Bangladesh	Asia	1	1	0	1	0	0	0	0	0	0	0	0	0	0	0	0	0	0	0	14	0.83	0.410959	0	0	0	0	0	1	0	0	0	ND27	2021-05-21	149461	Kit PBS	NCA2	17.0	0	0	1
ERS7114630	2.73	2	1	Dhaka	Bangladesh	Asia	0	0	0	0	0	0	0	1	0	0	0	0	0	0	0	0	0	1	0	12.45	-0.75	0.69863	0	1	0	0	0	0	0	0	0	ND27	2021-05-21	149461	Kit PBS	NCA2	17.0	0	0	1
ERS7114641	16.33	2	1	Dhaka	Bangladesh	Asia	0	0	0	0	0	0	0	0	1	0	1	0	1	0	0	1	1	0	1	14.6	-0.05	0.736986	1	0	0	0	0	0	0	0	0	ND27	2021-05-21	149461	Kit PBS	NCA2	17.0	0	0	0
ERS7114646	11.1	2	1	Dhaka	Bangladesh	Asia	1	0	0	0	0	0	0	0	0	0	0	0	0	0	0	0	0	0	0	13.95	-0.4	0.843836	0	0	0	0	0	0	0	1	0	ND27	2021-05-21	149461	Kit PBS	NCA2	17.0	0	0	1	132.48	3.76	2.57
ERS7114650	21.85	1	0	Dhaka	Bangladesh	Asia	0	1	0	0	0	0	0	1	1	0	0	0	0	0	0	1	0	1	0	12.95	-1.97	0.871233	1	0	0	0	0	0	0	0	0	ND28	2021-05-24	149461	Kit PBS	NCB2	17.0	0	0	0	136.1	4.24	2.44
ERS7114656	7.62	1	1	Dhaka	Bangladesh	Asia	0	1	0	0	0	0	0	0	1	1	1	0	1	0	0	0	1	0	1	12.85	-0.95	0.0328767	0	0	0	0	0	0	0	1	0	ND28	2021-05-24	149461	Kit PBS	NCB2	17.0	0	0	0	136.7	4.75	2.55
ERS7114016	20.96	1	0	Mbagathi	Kenya	Africa	0	0	0	0	0	0	0	1	1	1	1	1	1	1	1	1	1	1	0	15.05	-1.16	0.742466	0	0	0	0	0	0	1	0	0	MS44	2021-06-21	149461	Bottle 5	NC44	22.0	0	0	0	134	4.5	2.24
ERS7114017	18.07	1	1	Mbagathi	Kenya	Africa	0	0	0	0	0	0	0	1	1	1	1	1	1	1	1	1	1	1	0	13.95	-1	0.753425	0	1	0	0	0	0	0	0	0	MS44	2021-06-21	149461	Bottle 5	NC44	22.0	4	0	0	131	4.2	2.26
ERS7114027	14.59	2	1	Mbagathi	Kenya	Africa	0	0	0	0	0	0	0	0	1	1	1	1	1	0	1	1	1	1	0	12.95	-1.35	0.819178	0	0	0	0	0	0	0	1	0	MS45	2021-06-22	149461	Bottle 5	NC45	22.0	0	0	0	134	4.5	2.3
ERS7114066	9.82	1	1	Mbagathi	Kenya	Africa	0	0	0	0	0	0	0	1	1	1	1	1	1	1	0	0	1	1	0	14.05	-0.59	0.967123	1	0	0	0	0	0	0	0	2	MS45	2021-06-22	149461	Bottle 5	NC45	22.0	0	0	0	136	4.6	2.38
ERS7114072	2	1	1	Mbagathi	Kenya	Africa	0	0	0	0	0	0	0	0	0	0	0	0	0	0	0	0	0	0	0	13.05	0.75	0.0794521	1	0	0	0	0	0	0	0	0	MS45	2021-06-22	149461	Bottle 5	NC45	22.0	0	0	0	134	4.5	2.45
ERS7114074	3.61	1	1	Mbagathi	Kenya	Africa	0	0	0	0	0	0	0	0	0	0	0	0	0	0	0	0	0	0	0	15.05	1.48	0.0794521	1	0	0	0	0	0	0	0	0	MS45	2021-06-22	149461	Bottle 5	NC45	22.0	0	0	0	136	4.4	2.5
ERS7114167	23.29	1	0	Kampala	Uganda	Africa	0	0	0	0	0	0	0	0	1	1	1	0	1	0	1	0	1	1	0	14.65	1.26	0.589041	1	0	0	0	0	0	0	0	0	ND17	2021-05-06	146534	B3_04.May	NCQ	8.0	0	0	0	135	5.3	2.44
ERS7114177	4.99	1	1	Kampala	Uganda	Africa	0	1	1	0	0	0	0	1	0	0	0	0	0	0	0	0	0	0	0	12.65	-0.03	0.139726	0	0	0	0	0	0	1	0	0	ND18	2021-05-07	146534	B3_04.May	NCR	8.0	0	0	0	136	5.7	2.67
ERS7113819	9.36	1	1	Migori	Kenya	Africa	0	0	0	0	0	0	0	1	1	1	1	1	1	1	1	1	0	1	0	11.55	-2.7	0.254795	1	0	0	0	0	0	0	0	0	HB4	2021-06-08	149461	No.1	HB4	21.0	0	0	0
ERS7113829	17.51	1	0	Migori	Kenya	Africa	0	0	0	0	0	0	0	1	1	0	0	0	0	0	0	0	0	0	0	14.55	0.82	0.312329	1	0	0	0	0	0	0	0	0	HB4	2021-06-08	149461	No.1	HB4	21.0	4	0	0	135	4.9	2.69
ERS7113831	12.45	1	1	Migori	Kenya	Africa	0	0	0	0	0	0	0	0	0	0	0	0	0	0	0	0	0	0	0	13.55	0.46	0.315068	1	0	0	0	0	0	0	0	0	HB4	2021-06-08	149461	No.1	HB4	21.0	4	0	0	135	4.5	2.24
ERS7113833	7.1	1	1	Migori	Kenya	Africa	0	0	0	0	0	0	0	0	1	0	0	1	0	0	0	1	0	0	0	14.2	1.42	0.315068	0	0	0	0	0	0	1	0	0	HB4	2021-06-08	149461	No.1	HB4	21.0	3	0	0
ERS7113836	5.16	1	1	Migori	Kenya	Africa	0	0	0	0	0	0	0	1	1	0	0	0	0	0	0	0	0	1	0	13.55	0.69	0.449315	0	0	0	0	0	0	0	0	0	HB4	2021-06-08	149461	No.1	HB4	21.0	0	0	1	132	5.5	2.54
ERS7113837	16.33	2	1	Migori	Kenya	Africa	0	0	0	0	0	0	0	1	1	1	1	1	1	1	1	1	1	0	1	13.4	-0.31	0.487671	1	0	0	0	0	0	0	0	0	HB4	2021-06-08	149461	No.1	HB4	21.0	0	0	0	135	4.4	2.39
ERS7113842	3.42	2	1	Migori	Kenya	Africa	0	0	0	0	0	0	0	0	0	0	0	0	0	0	0	0	0	0	0	13.75	0.7	0.523288	0	0	0	0	0	0	0	0	0	HB4	2021-06-08	149461	No.1	HB4	21.0	3	0	1	135	4.5	2.47
ERS7114179	2.14	1	1	Kampala	Uganda	Africa	0	0	0	0	0	0	0	0	0	0	0	0	0	0	0	0	0	0	0	12.4	-0.54	0.161644	1	0	0	0	0	0	0	0	0	ND18	2021-05-07	146534	B3_04.May	NCR	8.0	3	0	0	139	5.3	2.63
ERS7113847	15.08	1	0	Migori	Kenya	Africa	0	0	0	0	0	0	0	1	1	1	1	1	1	1	1	1	1	1	0	13.35	-1.76	0.621918	0	1	0	0	0	0	0	0	0	HB4	2021-06-08	149461	No.1	HB4	21.0	3	0	0	136	4.3	2.43
ERS7113849	12.45	2	0	Migori	Kenya	Africa	0	0	0	0	0	0	0	1	1	1	1	1	1	1	1	1	1	1	1	12.95	-0.75	0.621918	1	0	0	0	0	0	0	0	0	HB4	2021-06-08	149461	No.1	HB4	21.0	0	0	0	134	4.3	2.43
ERS7113852	9.36	1	1	Migori	Kenya	Africa	0	0	0	0	0	0	0	1	1	1	1	1	1	1	0	0	0	0	0	13.55	-0.44	0.654795	1	0	0	0	0	0	0	0	0	HB4	2021-06-08	149461	No.1	HB4	21.0	0	0	0	136	4.4	2.4
ERS7113854	3.42	1	1	Migori	Kenya	Africa	0	0	0	0	0	0	0	1	0	0	0	0	0	0	0	0	0	0	0	11.9	-1.19	0.657534	1	0	0	0	0	0	0	0	0	HB4	2021-06-08	149461	No.1	HB4	21.0	0	0	0	140	4.9	2.53
ERS7113856	16.39	1	1	Migori	Kenya	Africa	0	0	0	0	0	0	0	1	1	1	1	1	1	1	1	1	1	1	0	14	0.69	0.673973	1	0	0	0	0	0	0	0	0	HB4	2021-06-08	149461	No.1	HB4	21.0	0	0	0	137	4.1	2.31
ERS7113859	13.9	1	1	Migori	Kenya	Africa	0	0	0	0	0	0	0	1	1	1	1	1	1	1	0	0	0	0	0	16.5	1.65	0.660274	1	0	0	0	0	0	0	0	0	HB4	2021-06-08	149461	No.1	HB4	21.0	0	0	0	136	5.1	2.41
ERS7113861	11.76	1	1	Migori	Kenya	Africa	0	0	0	0	0	0	0	1	1	1	1	1	1	1	1	1	1	1	0	14.45	3.28	0.660274	1	0	0	0	0	0	0	0	0	HB4	2021-06-08	149461	No.1	HB4	21.0	0	0	0
ERS7113864	22.27	2	1	Migori	Kenya	Africa	0	0	0	0	0	0	0	1	1	1	1	1	1	1	1	1	1	1	0	13.95	-0.31	0.660274	0	1	0	0	0	0	0	0	0	HB4	2021-06-08	149461	No.1	HB4	21.0	0	0	0	139	4.1	2.32
ERS7113865	4.93	2	1	Migori	Kenya	Africa	0	0	0	0	0	0	0	0	0	0	0	0	0	0	0	0	0	0	0	12.65	3.71	0.673973	1	0	0	0	0	0	0	0	0	HB4	2021-06-08	149461	No.1	HB4	21.0	0	0	0	136	4.7	2.49
ERS7113867	2	2	1	Migori	Kenya	Africa	0	0	0	0	0	0	0	0	0	0	0	0	0	0	0	0	0	0	0	12.6	0.39	0.715068	1	0	0	0	0	0	0	0	0	HB4	2021-06-08	149461	No.1	HB4	21.0	0	0	0	137	5.5	2.6
ERS7113869	5.58	1	1	Migori	Kenya	Africa	0	0	0	0	0	0	0	1	1	0	0	0	0	0	0	0	0	0	0	12.75	-0.8	0.715068	1	0	0	0	0	0	0	0	0	HB4	2021-06-08	149461	No.1	HB4	21.0	0	0	0	136	5.2	2.5
ERS7114181	3.52	2	1	Kampala	Uganda	Africa	0	1	0	0	0	0	0	0	0	0	0	0	0	0	0	0	0	0	0	14.9	3.05	0.29589	0	0	0	0	0	0	1	0	0	ND18	2021-05-07	146534	B3_04.May	NCR	8.0	0	0	0	129	4.9	2.63
ERS7113871	11.04	2	1	Migori	Kenya	Africa	0	0	0	0	0	0	0	1	1	1	0	1	1	0	0	0	0	1	0	13.35	0.27	0.731507	0	1	0	0	0	0	0	0	0	HB4	2021-06-08	149461	No.1	HB4	21.0	0	0	1	135		2.32
ERS7113875	22.27	1	0	Migori	Kenya	Africa	0	0	0	0	0	0	0	1	1	1	1	1	1	1	1	1	1	1	1	13.45	-1.91	0.775342	1	0	0	0	0	0	0	0	0	HB4	2021-06-09	149461	No.1	HB5	21.0	3	0	0	141	4.1	2.17
ERS7113876	14.09	1	1	Migori	Kenya	Africa	0	0	0	0	0	0	0	1	1	1	1	1	0	0	0	0	0	1	0	15.55	1.01	0.810959	1	0	0	0	0	0	0	0	0	HB5	2021-06-09	149461	No.1	HB5	21.0	0	0	0
ERS7113884	4.93	2	1	Migori	Kenya	Africa	0	0	0	0	0	0	0	1	1	1	0	1	1	1	0	1	0	1	0	13.55	6.37	0.30137	1	0	0	0	0	0	0	0	0	HB5	2021-06-09	149461	No.1	HB5	22.0	0	0	0	138	4.4	2.19
ERS7113888	5.88	2	1	Migori	Kenya	Africa	0	0	0	0	0	0	0	1	1	0	0	0	0	0	0	0	0	1	0	16.05	0.62	0.30411	1	0	0	0	0	0	0	0	0	HB5	2021-06-09	149461	No.1	HB5	22.0	0	0	0	138	5.4	2.46
ERS7113892	3.19	1	1	Migori	Kenya	Africa	0	0	0	0	0	0	0	1	0	0	0	0	0	0	0	0	0	0	0	13.45	0.55	0.30411	1	0	0	0	0	0	0	0	0	HB5	2021-06-09	149461	No.1	HB5	22.0	0	0	0	137	5.3	2.31
ERS7113897	7.52	1	1	Migori	Kenya	Africa	0	0	0	0	0	0	0	1	1	0	0	0	0	0	0	0	0	0	0	16.95	2.13	0.336986	1	0	0	0	0	0	0	0	0	HB5	2021-06-09	149461	No.1	HB5	22.0	0	0	0	139	5	2.58
ERS7114189	11.27	2	1	Kampala	Uganda	Africa	0	0	0	0	0	0	0	1	1	1	0	0	0	1	0	0	0	0	0	13.55	0.16	0.509589	1	0	0	0	0	0	0	0	0	ND18	2021-05-07	146534	B3_04.May	NCR	8.0	0	0	0	141	4.95	2.6
ERS7113902	9.46	2	1	Migori	Kenya	Africa	0	0	0	0	0	0	0	1	1	1	1	1	1	1	1	1	1	1	0	14.15	-0.53	0.339726	1	0	0	0	0	0	0	0	0	HB5	2021-06-09	149461	No.1	HB5	22.0	0	0	0	132	4.3	2.49
ERS7114013	6.9	2	1	Mbagathi	Kenya	Africa	0	0	0	0	0	0	0	1	1	1	1	1	1	0	0	0	1	1	0	14.45	1.3	0.731507	0	0	0	0	0	0	0	1	0	MS44	2021-06-21	149461	Bottle 5	NC44	22.0		0	0	133	4	2.47
ERS7114012	20.89	2	1	Mbagathi	Kenya	Africa	0	0	0	0	0	0	0	1	1	1	1	1	1	1	1	1	1	1	0	15.05	0.88	0.493088	1	0	0	0	0	0	0	0	2	MS44	2021-06-21	149461	Bottle 5	NC44	22.0	0	0	0
ERS7114019	16.89	1	1	Mbagathi	Kenya	Africa	0	0	0	0	0	0	0	1	1	1	1	1	1	0	0	1	1	1	0	18.45	3.11	0.761644	0	1	0	0	0	0	0	0	0	MS44	2021-06-21	149461	Bottle 5	NC44	22.0	0	0	0	138	4.5	2.54
ERS7114023	13.3	1	1	Mbagathi	Kenya	Africa	0	0	0	0	0	0	0	1	1	0	1	1	1	1	1	0	1	1	0	13.75	-1.19	0.794521	1	0	0	0	0	0	0	0	0	MS45	2021-06-22	149461	Bottle 5	NC45	22.0	0	0	0	140	4.2	2.43
ERS7114025	11.96	1	1	Mbagathi	Kenya	Africa	0	0	0	0	0	0	0	1	1	1	1	1	1	1	1	1	1	1	0	14.05	-0.66	0.810959	1	0	0	0	0	0	0	0	0	MS45	2021-06-22	149461	Bottle 5	NC45	22.0	0	0	0	137	4.7	2.27
ERS7114029	15.87	1	1	Mbagathi	Kenya	Africa	0	0	0	0	0	0	0	1	1	1	1	1	1	1	1	1	1	1	0	16.95	2.46	0.827397	1	0	0	0	0	0	0	0	0	MS45	2021-06-22	149461	Bottle 5	NC45	22.0	0	0	0	138	4.6	2.35
ERS7114059	17.02	1	0	Mbagathi	Kenya	Africa	0	0	0	0	0	0	0	1	1	1	1	1	1	1	1	1	1	1	0	13.55	-0.52	0.846575	0	1	0	0	0	0	0	0	0	MS45	2021-06-22	149461	Bottle 5	NC45	22.0	3	0	0	134	4.6	2.33
ERS7114062	7.82	1	1	Mbagathi	Kenya	Africa	0	0	0	0	0	0	0	1	1	0	0	0	0	1	0	0	1	0	0	14.35	0.46	0.857534	0	0	0	0	0	0	0	1	0	MS45	2021-06-22	149461	Bottle 5	NC45	22.0	0	0	0
ERS7114064	16.75	1	1	Mbagathi	Kenya	Africa	0	0	0	0	0	0	0	1	1	1	1	1	1	1	1	1	1	1	0	13.45	-1.73	0.942466	1	0	0	0	0	0	0	0	0	MS45	2021-06-22	149461	Bottle 5	NC45	22.0	0	0	0	135	4.6	2.4
ERS7114067	21.29	1	0	Mbagathi	Kenya	Africa	0	0	0	0	0	0	0	1	1	1	1	1	1	1	1	1	1	1	0	15.25	1.71	0.030137	0	0	0	0	0	0	0	1	0	MS45	2021-06-22	149461	Bottle 5	NC45	22.0	0	0	0	135	4.3	2.36
ERS7114069	20.4	1	1	Mbagathi	Kenya	Africa	0	0	0	0	0	0	0	1	1	1	1	1	1	1	1	1	1	1	0	14.55	0.31	0.0493151	1	0	0	0	0	0	0	0	0	MS45	2021-06-22	149461	Bottle 5	NC45	22.0	0	0	0	140	4.5	2.54
ERS7114071	15.31	1	1	Mbagathi	Kenya	Africa	0	0	0	0	0	0	0	1	1	1	1	1	1	0	1	1	1	1	0	13.55	0.27	0.0493151	1	0	0	0	0	0	0	0	0	MS45	2021-06-22	149461	Bottle 5	NC45	22.0	0	0	0	139	4.5	2.51
ERS7114076	14.32	1	1	Mbagathi	Kenya	Africa	0	0	0	0	0	0	0	1	1	1	0	1	0	0	0	0	1	1	0	13.75	-1.32	0.10137	1	0	0	0	0	0	0	0	0	MS45	2021-06-22	149461	Bottle 5	NC45	22.0	0	0	0	135	5.2	2.5
ERS7114077	23.29	2	0	Mbagathi	Kenya	Africa	0	0	0	0	0	0	0	1	1	1	1	1	1	1	0	1	1	1	0	15.05	0.48	0.106849	0	0	0	0	0	0	0	1	0	MS45	2021-06-22	149461	Bottle 5	NC45	22.0	0	0	0	136	5.4	2.43
ERS7113839	11.76	1	0	Migori	Kenya	Africa	0	0	0	0	0	0	0	0	1	1	1	1	1	1	1	1	1	1	0	12.65	-1.36	0.523288	1	0	0	0	0	0	0	0	0	HB4	2021-06-08	149461	No.1	HB4	21.0	3	0	0	134	4.5	2.3
ERS7114163	13.24	1	0	Kampala	Uganda	Africa	0	0	0	0	0	0	0	0	1	0	0	0	0	1	0	0	0	0	0	14.2	0.5	0.243836	1	0	0	0	0	0	0	0	0	ND17	2021-05-06	146534	B3_04.May	NCQ	8.0	0	0	0	135	5.3
ERS7114165	18.89	1	1	Kampala	Uganda	Africa	0	0	0	0	0	1	0	1	1	0	1	0	1	0	1	0	0	1	0	14.4	-0.13	0.410959	1	0	0	0	0	0	0	0	0	ND17	2021-05-06	146534	B3_04.May	NCQ	8.0	0	0	0	137	4.8	2.49
ERS7113843	6.37	2	1	Migori	Kenya	Africa	0	0	0	0	0	0	0	0	1	0	0	0	0	0	0	0	0	0	0	14.55	0.68	0.523288	0	1	0	0	0	0	0	0	0	HB4	2021-06-08	149461	No.1	HB4	21.0	3	0	0	133	4.2	2.39
ERS7114169	16.62	2	0	Kampala	Uganda	Africa	0	0	0	0	0	0	0	1	1	1	0	0	0	0	1	0	0	0	0	12.8	-0.52	0.619178	1	0	0	0	0	0	0	0	0	ND17	2021-05-06	146534	B3_04.May	NCQ	8.0	0	0	0	133	4.6	2.43
ERS7113845	8.34	2	1	Migori	Kenya	Africa	0	0	0	0	0	0	0	1	1	1	1	1	1	1	1	1	1	1	0	12.95	-0.89	0.621918	1	0	0	0	0	0	0	0	0	HB4	2021-06-08	149461	No.1	HB4	21.0	0	0	1	137	5	2.42
ERS7114171	18.13	2	1	Kampala	Uganda	Africa	0	0	0	0	0	0	0	1	0	1	0	0	0	0	1	0	0	0	0	14.8	0.15	0.953425	0	0	0	0	0	0	1	0	2	ND17	2021-05-06	146534	B3_04.May	NCQ	8.0	0	0	0	137	4.6	2.58
ERS7113857	5.09	1	1	Migori	Kenya	Africa	0	0	0	0	0	0	0	1	0	0	0	0	0	0	0	0	0	0	0	13.55	-0.31	0.660274	1	0	0	0	0	0	0	0	0	HB4	2021-06-08	149461	No.1	HB4	21.0	3	0	0
ERS7114175	14.52	2	0	Kampala	Uganda	Africa	0	0	0	0	0	0	0	0	1	1	0	0	1	0	1	0	0	0	0	14.45	0.14	0.969863	0	0	0	0	0	0	0	1	0	ND18	2021-05-07	146534	B3_04.May	NCR	8.0	4	0	0	135	4.8	2.52
ERS7113879	3.22	1	1	Migori	Kenya	Africa	0	0	0	0	0	0	0	0	0	0	0	0	0	0	0	0	0	0	0	13.25	1.51	0.810959	1	0	0	0	0	0	0	0	1	HB5	2021-06-09	149461	No.1	HB5	21.0	0	0	1
ERS7114183	17.87	2	0	Kampala	Uganda	Africa	0	1	0	0	0	0	0	1	1	1	1	0	1	1	0	1	1	1	0	12.65	-1.34	0.353425	1	0	0	0	0	0	0	0	0	ND18	2021-05-07	146534	B3_04.May	NCR	8.0	3	0	1	130	5.7	2.41
ERS7113880	2.46	1	1	Migori	Kenya	Africa	0	0	0	0	0	0	0	0	0	0	0	0	0	0	0	0	0	0	0	14.1	0.99	0.493088	0	1	0	0	0	0	0	0	0	HB5	2021-06-09	149461	No.1	HB5	22.0	0	0	0	135	5	2.62
ERS7114185	7.69	1	1	Kampala	Uganda	Africa	0	0	0	0	0	0	0	1	0	0	0	0	0	0	0	0	0	0	0	14.5	1.1	0.375342	1	0	0	0	0	0	0	0	0	ND18	2021-05-07	146534	B3_04.May	NCR	8.0	0	0	0	137	5.4	2.39
ERS7113883	9.76	1	1	Migori	Kenya	Africa	0	0	0	0	0	0	0	1	1	0	0	1	0	0	0	0	0	0	0	14.85	0.37	0.29863	0	1	1	0	0	0	0	0	0	HB5	2021-06-09	149461	No.1	HB5	22.0	0	0	0	137	5.6	2.17
ERS7114186	17.9	2	1	Kampala	Uganda	Africa	0	0	0	0	0	0	0	0	1	0	0	0	1	1	0	0	0	0	0	15.8	0.77	0.509589	1	0	0	0	0	0	0	0	1	ND18	2021-05-07	146534	B3_04.May	NCR	8.0	0	0	0	142	4.93	2.64
ERS7114190	15.05	1	0	Kampala	Uganda	Africa	0	0	0	0	0	0	0	1	1	1	0	0	1	1	1	0	0	1	0	14	-0.26	0.545205	1	0	0	0	0	0	0	0	0	ND18	2021-05-07	146534	B3_04.May	NCR	8.0	0	0	0	148	4.65	2.57
ERS7113898	5.19	1	1	Migori	Kenya	Africa	0	0	0	0	0	0	0	1	1	0	0	0	0	0	0	0	0	0	0	13.05	-1.07	0.339726	1	0	0	0	0	0	0	0	0	HB5	2021-06-09	149461	No.1	HB5	22.0	0	0	0	136	4.7	2.4
ERS7113900	15.34	1	1	Migori	Kenya	Africa	0	0	0	0	0	0	0	1	1	1	1	1	1	1	1	1	1	1	1	15.45	0.44	0.339726	1	0	0	0	0	0	0	0	0	HB5	2021-06-09	149461	No.1	HB5	22.0	0	0	0	138	4	2.35
ERS7113903	22.67	2	0	Migori	Kenya	Africa	0	0	0	0	0	0	0	1	1	1	1	1	1	1	0	1	0	1	0	15.65	1.23	0.345205	0	0	0	1	0	0	0	0	0	HB5	2021-06-09	149461	No.1	HB5	22.0	0	0	0	137	3.8	2.35
ERS7113904	12.22	2	1	Migori	Kenya	Africa	0	0	0	0	0	0	0	1	1	1	1	1	1	1	0	1	1	1	0	15.45	0.29	0.345205	1	0	0	0	0	0	0	0	0	HB5	2021-06-09	149461	No.1	HB5	22.0	0	0	0	136	3.9	2.43
ERS7114595	7.13	2	1	Dhaka	Bangladesh	Asia	0	0	0	0	0	0	0	1	1	0	0	0	0	0	0	0	0	1	0	12.25	-1.98	0.257534	0	1	0	0	0	1	0	0	0	ND26	2021-05-20	149461	Kit PBS	NCZ	17.0	0	0	0
ERS7114597	19.32	1	1	Dhaka	Bangladesh	Asia	0	0	0	1	0	0	0	0	1	1	1	1	1	1	0	0	1	0	1	13.1	-2.17	0.306849	0	0	0	0	0	0	0	1	0	ND26	2021-05-20	149461	Kit PBS	NCZ	17.0	0	0	0
ERS7114604	20.2	2	1	Dhaka	Bangladesh	Asia	0	1	0	1	0	0	0	0	1	0	0	0	0	0	0	0	0	0	0	12.25	-2.92	0.545205	1	0	0	0	0	0	0	0	0	ND27	2021-05-21	149461	Kit PBS	NCA2	17.0	0	0	0
ERS7114606	11.17	2	1	Dhaka	Bangladesh	Asia	0	1	0	0	0	0	0	1	1	1	0	0	0	0	0	1	0	1	1	13.6	-0.97	0.613699	1	0	0	0	0	0	0	0	0	ND27	2021-05-21	149461	Kit PBS	NCA2	17.0	0	0	0
ERS7114608	22.27	1	1	Dhaka	Bangladesh	Asia	0	0	0	0	0	0	0	0	1	1	0	0	1	0	0	0	1	0	0	15.6	0.67	0.789041	0	0	0	0	0	0	1	0	0	ND27	2021-05-21	149461	Kit PBS	NCA2	17.0	0	0	1
ERS7114609	4.4	1	1	Dhaka	Bangladesh	Asia	0	0	0	1	0	0	0	1	0	0	0	0	0	0	0	0	0	1	0	12.4	0.6	0.969863	1	0	0	0	0	0	0	0	2	ND27	2021-05-21	149461	Kit PBS	NCA2	17.0	0	0	1
ERS7114613	8.18	1	1	Dhaka	Bangladesh	Asia	0	0	0	0	0	1	0	1	1	0	0	0	0	0	0	0	0	1	0	13.6	0.82	0.0273973	0	0	0	0	0	0	0	1	0	ND27	2021-05-21	149461	Kit PBS	NCA2	17.0	0	0	0
ERS7114614	21.98	1	1	Dhaka	Bangladesh	Asia	0	0	0	0	0	0	0	0	1	1	1	0	1	1	1	0	1	0	1	12.3	-1.25	0.150685	1	0	0	0	0	0	0	0	2	ND27	2021-05-21	149461	Kit PBS	NCA2	17.0	0	0	1
ERS7114616	6.04	2	1	Dhaka	Bangladesh	Asia	0	0	0	0	0	0	0	1	0	0	0	0	1	0	0	0	1	0	0	13.3	-0.75	0.241096	0	1	0	0	0	0	1	0	0	ND27	2021-05-21	149461	Kit PBS	NCA2	17.0	0	0	1
ERS7114620	3.15	2	1	Dhaka	Bangladesh	Asia	1	0	0	0	0	0	0	0	0	0	0	0	0	0	0	0	0	0	0	13.5	0.6	0.369863	0	1	0	0	0	0	0	0	0	ND27	2021-05-21	149461	Kit PBS	NCA2	17.0	0	0	0
ERS7114626	10.28	1	1	Dhaka	Bangladesh	Asia	0	0	0	0	0	0	0	1	1	0	0	0	0	0	0	0	0	1	0	13.35	-1.39	0.50137	1	0	0	0	0	0	0	0	0	ND27	2021-05-21	149461	Kit PBS	NCA2	17.0	0	0	1
ERS7114628	22.5	1	0	Dhaka	Bangladesh	Asia	1	0	0	0	0	0	0	1	1	1	1	1	1	1	1	1	1	1	1	14.65	-1.85	0.539726	0	0	0	0	0	0	0	1	0	ND27	2021-05-21	149461	Kit PBS	NCA2	17.0	0	0	0
ERS7114632	5.45	2	1	Dhaka	Bangladesh	Asia	0	0	0	0	0	0	0	1	1	0	0	0	0	0	0	0	0	1	0	13.25	0.11	0.709589	0	0	0	0	0	0	1	0	0	ND27	2021-05-21	149461	Kit PBS	NCA2	17.0	0	0	0
ERS7114634	6.27	2	1	Dhaka	Bangladesh	Asia	0	0	0	0	0	0	0	0	1	1	1	1	1	0	0	1	0	1	0	12.7	-0.99	0.715068	0	1	0	0	0	0	0	0	0	ND27	2021-05-21	149461	Kit PBS	NCA2	17.0	0	0	0
ERS7114636	7.39	2	1	Dhaka	Bangladesh	Asia	0	0	0	1	0	0	0	1	0	1	1	1	1	0	0	1	1	1	0	15.95	3	0.717808	1	0	0	0	0	0	0	0	2	ND27	2021-05-21	149461	Kit PBS	NCA2	17.0	0	0	0
ERS7114638	19.55	1	1	Dhaka	Bangladesh	Asia	1	0	0	1	0	0	0	1	1	1	0	0	0	0	0	1	0	0	0	12.65	-2.21	0.736986	1	0	0	0	0	0	0	0	2	ND27	2021-05-21	149461	Kit PBS	NCA2	17.0	0	0	1
ERS7114642	12.19	2	1	Dhaka	Bangladesh	Asia	0	0	0	0	0	0	0	0	0	0	0	0	1	0	0	0	1	0	0	13.1	-0.78	0.767123	0	0	0	0	0	0	1	0	0	ND27	2021-05-21	149461	Kit PBS	NCA2	17.0	0	0	1
ERS7114645	20.57	2	1	Dhaka	Bangladesh	Asia	0	0	0	0	0	0	0	0	1	0	0	0	0	0	0	0	0	1	0	13.8	-1.04	0.775342	1	0	0	0	0	0	0	0	0	ND27	2021-05-21	149461	Kit PBS	NCA2	17.0	0	0	1
ERS7114652	13.11	1	1	Dhaka	Bangladesh	Asia	1	0	0	0	0	0	0	0	1	1	0	0	1	1	1	1	0	0	1	13.55	-0.73	0.882192	0	0	0	0	0	1	0	0	0	ND28	2021-05-24	149461	Kit PBS	NCB2	17.0	0	0	1	131.6	4.21	2.4
ERS7114654	21.52	2	1	Dhaka	Bangladesh	Asia	0	0	0	0	0	0	0	1	1	1	0	1	1	0	0	0	0	1	0	13.4	-0.89	0.890411	0	0	0	0	0	0	1	0	0	ND28	2021-05-24	149461	Kit PBS	NCB2	17.0	0	0	0	134.7	3.64	2.33
ERS7114975	11.6	1	1	Matlab	Bangladesh	Asia	0	0	0	0	0	0	0	1	1	1	1	1	1	1	1	1	1	1	1	14.15	0.23	0.0575342	1	0	0	0	0	0	0	0	0	ND34	2021-06-08	149461	Kit PBS	NCH2	19.0	0	0	0
ERS7114978	18.56	2	1	Matlab	Bangladesh	Asia	0	0	0	0	0	0	0	1	1	1	1	1	1	1	1	1	1	1	1	12.55	-1.75	0.216438	0	0	0	0	0	0	0	0	0	ND34	2021-06-08	149461	Kit PBS	NCH2	19.0	0	0	0
ERS7114980	12.25	2	1	Matlab	Bangladesh	Asia	0	0	0	0	0	0	0	1	1	1	1	1	1	1	1	1	1	1	1	12.75	-0.77	0.271233	0	1	0	0	0	0	0	0	0	ND35	2021-06-09	149461	Kit PBS	NCI2	19.0	0	0	0
ERS7114987	12.61	2	1	Matlab	Bangladesh	Asia	0	0	0	0	0	0	0	1	1	1	1	1	1	1	1	1	1	1	1	11.55	-1.43	0.394521	1	0	0	0	0	0	0	0	0	ND35	2021-06-09	149461	Kit PBS	NCI2	19.0	0	0	1
ERS7114988	6.34	2	1	Matlab	Bangladesh	Asia	0	0	0	0	0	0	0	1	0	0	0	1	0	0	0	0	0	1	0	15.85	2.12	0.487671	1	0	0	0	0	0	0	0	0	ND35	2021-06-09	149461	Kit PBS	NCI2	19.0	0	0	1
ERS7114990	8.97	1	1	Matlab	Bangladesh	Asia	0	0	0	0	0	0	0	1	1	1	1	1	1	1	1	1	1	1	0	13.15	-0.86	0.619178	1	0	0	0	0	0	0	0	0	ND35	2021-06-09	149461	Kit PBS	NCI2	19.0	0	0	0
ERS7114993	12.12	1	1	Matlab	Bangladesh	Asia	0	0	0	0	0	0	0	0	1	1	1	1	1	1	1	1	1	1	1	14.25	-0.22	0.619178	1	0	0	0	0	0	0	0	0	ND35	2021-06-09	149461	Kit PBS	NCI2	19.0	0	0	1
ERS7114994	21.16	1	1	Matlab	Bangladesh	Asia	0	0	0	1	0	0	0	1	1	1	1	1	1	1	1	1	1	1	1	12.65	-2.41	0.632877	1	0	0	0	0	0	0	0	0	ND35	2021-06-09	149461	Kit PBS	NCI2	19.0	0	0	0
ERS7114996	11.5	2	1	Matlab	Bangladesh	Asia	0	0	0	0	0	0	0	0	0	1	0	0	0	0	0	0	0	0	0	12.25	-2.24	0.652055	1	0	0	0	0	0	0	0	0	ND35	2021-06-09	149461	Kit PBS	NCI2	19.0	0	0	0
ERS7114997	15.47	2	1	Matlab	Bangladesh	Asia	0	0	0	0	0	0	0	0	1	1	1	1	1	1	1	1	1	1	1	13.45	-0.35	0.663014	0	0	0	0	0	0	0	1	0	ND35	2021-06-09	149461	Kit PBS	NCI2	19.0	0	0	1
ERS7115003	13.86	1	1	Matlab	Bangladesh	Asia	0	0	0	0	0	0	0	1	1	1	1	1	0	1	0	1	1	1	1	13.15	-1.13	0.717808	1	0	0	0	0	0	0	0	0	ND35	2021-06-09	149461	Kit PBS	NCI2	19.0	0	0	0
ERS7115006	11.3	2	1	Matlab	Bangladesh	Asia	0	0	0	0	0	0	0	0	1	1	1	1	1	1	1	1	1	1	1	14.55	0.24	0.720548	1	0	0	0	0	0	0	0	0	ND35	2021-06-09	149461	Kit PBS	NCI2	19.0	0	0	0
ERS7115004	18.79	2	0	Matlab	Bangladesh	Asia	0	0	0	1	0	0	0	1	1	1	1	1	1	1	1	1	1	1	1	13.05	-0.99	0.775342	1	0	0	0	0	0	0	0	0	ND35	2021-06-09	149461	Kit PBS	NCI2	19.0	0	0	0
ERS7115012	11.86	1	1	Matlab	Bangladesh	Asia	0	0	0	0	0	0	0	1	1	1	1	1	1	1	0	1	1	1	1	12.65	-2.78	0.871233	0	1	0	0	0	0	0	1	2	ND35	2021-06-09	149461	Kit PBS	NCI2	19.0	0	0	0	133.68	4.22	2.43
ERS7115014	16.46	2	1	Matlab	Bangladesh	Asia	0	0	0	0	0	0	0	1	1	1	1	1	1	1	1	1	1	1	1	14.45	0.09	0.887671	0	1	0	0	0	0	0	1	0	ND35	2021-06-09	149461	Kit PBS	NCI2	19.0	0	0	1	137.43	4.27	2.51
ERS7114972	13.37	1	1	Matlab	Bangladesh	Asia	0	1	0	0	0	0	0	1	1	1	1	0	1	1	1	1	1	1	1	14.15	-0.64	0.926027	1	0	0	0	0	0	0	0	0	ND35	2021-06-09	149461	Kit PBS	NCI2	19.0	0	0	1	134.41	4.46	2.26
ERS7115016	16.49	1	1	Matlab	Bangladesh	Asia	0	0	0	1	0	0	0	1	1	1	1	1	1	1	1	1	1	1	1	13.75	-1.47	0.060274	1	0	0	0	0	0	0	0	0	ND35	2021-06-09	149461	Kit PBS	NCI2	19.0	0	0	0	142.2	4.17	2.47
ERS7115019	8.25	1	1	Matlab	Bangladesh	Asia	0	0	0	0	0	0	0	0	1	1	1	1	1	1	1	1	1	1	1	12.9	-0.85	0.0931507	1	0	0	0	0	0	0	0	0	ND35	2021-06-09	149461	Kit PBS	NCI2	19.0	0	0	0	136.08	4.8	2.61
ERS7115020	3.02	1	1	Matlab	Bangladesh	Asia	1	0	0	0	0	0	0	0	0	0	0	0	0	0	0	0	0	0	0	11.55	-0.35	0.0958904	1	0	0	0	0	0	0	0	0	ND35	2021-06-09	149461	Kit PBS	NCI2	19.0	0	0	1	134.84	4.54	2.64
ERS7115024	19.12	2	0	Matlab	Bangladesh	Asia	0	0	0	0	0	0	0	0	1	1	1	1	1	1	1	1	1	1	1	12.75	-2.01	0.515068	1	0	0	0	0	0	0	0	0	ND35	2021-06-09	149461	Kit PBS	NCI2	19.0	0	0	0	129.7	3.59	2.37
ERS7114968	7.92	2	1	Matlab	Bangladesh	Asia	0	0	0	0	0	0	0	0	1	1	1	0	0	1	0	0	0	0	0	12.15	-1.39	0.0821918	0	1	0	0	0	0	0	0	0	ND34	2021-06-08	149461	Kit PBS	NCH2	19.0	0	0	0
ERS6283880	15.7	2	1	Banfora	Burkina Faso	Africa	0	0	0	0	0	0	0	0	1	0	0	0	0	1	1	0	1	1	0	13.8	0.09	0.487671	0	0	0	0	0	0	0	1	0	MS1	2021-04-06	120434	Bottle 1	NC1	3.0	0	0	0	131.1	4.5	2.43
ERS6283891	14.62	2	1	Banfora	Burkina Faso	Africa	0	0	0	0	0	0	0	0	1	0	0	0	0	1	1	0	1	1	0	13.15	-0.66	0.739726	1	0	0	0	0	0	0	0	0	MS1	2021-04-06	120434	Bottle 1	NC1	3.0	0	0	0	142.9	4.17	1.85
ERS6283900	8.94	2	1	Banfora	Burkina Faso	Africa	0	0	0	0	0	0	0	0	1	0	0	1	0	0	0	0	1	0	0	13.4	0.22	0.884932	1	0	0	0	0	0	0	0	0	MS1	2021-04-06	120434	Bottle 1	NC1	3.0	0	0	0
ERS7114969	2.23	1	1	Matlab	Bangladesh	Asia	0	0	0	0	0	0	0	1	0	0	0	0	0	0	0	0	0	0	0	10.65	-1.72	0.364384	0	0	0	0	0	0	0	0	0	ND34	2021-06-08	149461	Kit PBS	NCH2	19.0	0	0	1
ERS7114970	11.5	1	1	Matlab	Bangladesh	Asia	0	0	0	0	0	0	0	1	1	1	1	1	0	1	1	1	1	1	1	13.45	-1.26	0.523288	1	0	0	0	0	0	0	0	0	ND34	2021-06-08	149461	Kit PBS	NCH2	19.0	0	0	0
ERS15562520	13.76	2	1	Karachi	Pakistan	Asia	0	0	0	0	0	0	0	1	0	0	0	1	0	0	0	0	0	0	0	13.75	-1.02	0.742466	1	0	0	0	0	0	0	0	0	MS5	2023-01-26	146534	A	MS5NEG	2.0	0	0	0	137	4.9	3.32103
ERS15562394	12.32	2	1	Kilifi	Kenya	Africa	0	0	0	0	0	0	0	0	1	0	0	0	0	0	0	0	0	0	0	13.1	-1.78	0.273973	1	0	0	0	0	0	0	0	0	MS1	2023-01-18	146534	A	MS1NEG	1.0	0	0	0
ERS15562395	13.96	1	1	Kilifi	Kenya	Africa	0	0	0	0	0	0	1	0	1	0	1	0	1	0	0	0	0	0	0	16.3	0.74	0.353425	1	0	0	0	0	0	0	0	0	MS1	2023-01-18	146534	A	MS1NEG	1.0	3	0	0
ERS15562396	17.81	1	1	Kilifi	Kenya	Africa	0	0	0	0	0	0	0	0	1	0	1	0	0	0	0	0	0	0	0	13.25	-1.64	0.430137	1	0	0	0	0	0	0	0	0	MS1	2023-01-18	146534	A	MS1NEG	1.0	0	0	0
ERS15562398	22.31	1	0	Kilifi	Kenya	Africa	0	1	0	0	0	0	1	1	1	0	0	0	0	0	0	0	0	0	0	13.6	-1.25	0.438356	0	0	0	0	0	0	0	1	0	MS1	2023-01-18	146534	A	MS1NEG	1.0	0	0	0
ERS15562399	15.51	2	0	Kilifi	Kenya	Africa	0	0	0	0	0	0	0	0	1	0	1	0	0	0	0	0	0	0	0	13.45	-0.92	0.438356	1	0	0	0	0	0	0	0	0	MS1	2023-01-18	146534	A	MS1NEG	1.0	0	0	0
ERS15562400	17.67	1	0	Kilifi	Kenya	Africa	0	0	0	0	0	0	0	0	1	0	1	0	0	0	0	0	0	0	0	13.45	-2.29	0.446575	1	0	0	0	0	0	0	0	0	MS1	2023-01-18	146534	A	MS1NEG	1.0	0	0	0
ERS15562401	23.39	2	1	Kilifi	Kenya	Africa	0	0	0	0	0	0	0	1	1	0	0	0	0	0	0	0	0	0	0	14.5	-0.38	0.452055	1	0	0	0	0	0	0	0	0	MS1	2023-01-18	146534	A	MS1NEG	1.0	0	0	0
ERS15562403	18.92	2	0	Kilifi	Kenya	Africa	0	0	0	0	0	0	0	1	1	0	1	0	0	0	0	0	0	0	0	10.75	-2.2	0.465753	1	0	0	0	0	0	0	0	0	MS1	2023-01-18	146534	A	MS1NEG	1.0	0	0	0
ERS15562404	11.96	2	1	Kilifi	Kenya	Africa	0	0	0	0	0	0	0	1	1	0	0	0	0	0	0	0	0	0	0	13.8	-1.25	0.509589	1	0	0	0	0	0	0	0	0	MS1	2023-01-18	146534	A	MS1NEG	1.0	0	0	0
ERS15562405	15.21	1	1	Kilifi	Kenya	Africa	0	0	0	0	0	0	0	1	1	1	1	1	1	1	1	1	1	1	0	15.15	0.01	0.509589	1	0	0	0	0	0	0	0	0	MS1	2023-01-18	146534	A	MS1NEG	1.0	0	0	0
ERS15562407	20.57	1	1	Kilifi	Kenya	Africa	0	0	0	0	0	0	0	1	1	0	1	1	1	1	1	1	1	1	0	14.2	-1.01	0.526027	0	1	0	0	0	0	0	0	0	MS1	2023-01-18	146534	A	MS1NEG	1.0	0	0	0
ERS15562521	11.14	1	1	Karachi	Pakistan	Asia	0	0	1	0	0	0	0	1	0	0	1	1	0	0	0	1	0	0	0	13.65	-1.06	0.756164	0	0	0	0	0	0	1	0	0	MS5	2023-01-26	146534	A	MS5NEG	2.0	0	0	0	140	4.3	3.35674
ERS15562408	13.04	2	1	Kilifi	Kenya	Africa	0	0	0	0	0	0	0	1	1	1	1	0	1	0	0	0	0	0	0	12.95	-0.76	0.528767	1	0	0	0	0	0	0	0	0	MS1	2023-01-18	146534	A	MS1NEG	1.0	0	0	0
ERS15562409	6.9	2	1	Kilifi	Kenya	Africa	0	0	0	0	0	0	0	0	1	0	0	0	0	0	0	0	0	0	0	12	-0.2	0.660274	1	0	0	0	0	0	0	0	0	MS1	2023-01-18	146534	A	MS1NEG	1.0	0	0	0
ERS15562411	16.52	1	0	Kilifi	Kenya	Africa	0	0	0	0	0	0	0	1	1	0	1	1	0	1	0	0	0	0	0	15.55	0.39	0.742466	1	0	0	0	0	0	0	0	0	MS1	2023-01-18	146534	A	MS1NEG	1.0	3	0	0
ERS15562412	11.79	1	1	Kilifi	Kenya	Africa	0	0	0	0	0	0	0	1	1	0	1	1	0	0	0	0	0	0	0	13.7	-1.19	0.742466	1	0	0	0	0	0	0	0	0	MS1	2023-01-18	146534	A	MS1NEG	1.0	0	0	0
ERS15562413	18.59	1	1	Kilifi	Kenya	Africa	0	0	0	0	0	0	0	1	1	0	0	0	0	0	0	0	0	0	0	14.6	-0.04	0.758904	1	0	0	0	0	0	0	0	0	MS1	2023-01-18	146534	A	MS1NEG	1.0	0	0	1
ERS15562414	11.01	1	1	Kilifi	Kenya	Africa	0	0	0	0	0	0	0	1	1	0	0	0	0	0	0	0	0	0	0	14	-1.13	0.794521	0	0	0	0	0	0	0	1	0	MS1	2023-01-18	146534	A	MS1NEG	1.0	0	0	1
ERS15562415	18.66	1	1	Kilifi	Kenya	Africa	0	0	0	0	0	0	0	1	1	1	1	1	1	0	0	0	1	1	0	12.7	-1.95	0.643836	1	0	0	0	0	0	0	0	0	MS2	2023-01-19	146534	A	MS2NEG	1.0	0	0	0
ERS15562416	14.82	2	0	Kilifi	Kenya	Africa	0	0	0	0	0	0	0	1	1	0	0	1	0	0	0	0	0	0	0	11.6	-3.32	0.665753	0	1	0	0	0	0	0	0	2	MS2	2023-01-19	146534	A	MS2NEG	1.0	0	0	0
ERS15562417	17.44	1	0	Kilifi	Kenya	Africa	0	0	0	0	0	0	0	1	1	0	1	1	0	1	1	0	0	1	0	16.05	0.91	0.665753	1	0	0	0	0	0	0	0	0	MS2	2023-01-19	146534	A	MS2NEG	1.0	0	0	0
ERS15562524	8.11	1	1	Karachi	Pakistan	Asia	0	0	0	0	1	0	0	1	0	0	0	1	0	0	0	0	0	0	0	13.05	-0.91	0.775342	1	0	0	0	0	0	0	0	0	MS5	2023-01-26	146534	A	MS5NEG	2.0	0	0	0	139	5.4	3.67813
ERS15562418	14.32	1	0	Kilifi	Kenya	Africa	0	0	0	0	0	0	0	1	1	0	1	1	1	0	0	0	1	1	0	13	-1.27	0.682192	1	0	0	0	0	0	0	0	0	MS2	2023-01-19	146534	A	MS2NEG	1.0	4	0	0
ERS15562419	13.99	2	1	Kilifi	Kenya	Africa	0	0	0	0	0	0	0	0	1	0	1	1	0	0	0	0	0	0	0	12.6	-0.8	0.684932	1	0	0	0	0	0	0	0	0	MS2	2023-01-19	146534	A	MS2NEG	1.0	0	0	0
ERS15562421	6.47	1	1	Kilifi	Kenya	Africa	0	0	0	0	0	0	0	0	1	0	0	0	0	0	0	0	0	0	0	14.5	-0.25	0.717808	1	0	0	0	0	0	0	0	0	MS2	2023-01-19	146534	A	MS2NEG	1.0	0	0	1	138	4.6	2.49
ERS15562420	8.11	2	1	Kilifi	Kenya	Africa	0	0	0	0	0	0	0	0	1	0	0	1	0	0	0	1	0	0	0	12.9	0.25	0.720548	1	0	0	0	0	0	0	0	1	MS2	2023-01-19	146534	A	MS2NEG	1.0	0	0	1	134	4.6	2.12
ERS15562422	23.09	1	0	Kilifi	Kenya	Africa	0	0	0	0	0	0	0	0	1	1	1	1	0	1	0	1	0	0	0	15.05	-0.54	0.720548	0	0	0	0	0	0	0	1	0	MS2	2023-01-19	146534	A	MS2NEG	1.0	0	0	0	136	3.9	2.31
ERS15562423	13.63	1	1	Kilifi	Kenya	Africa	0	0	0	0	0	0	0	0	1	1	1	1	0	0	0	0	1	0	0	15.1	-0.02	0.720548	1	0	0	0	0	0	0	0	0	MS2	2023-01-19	146534	A	MS2NEG	1.0	0	0	0	138	4.2	2.55
ERS15562424	8.38	1	1	Kilifi	Kenya	Africa	0	0	0	0	0	0	0	0	1	0	0	0	0	0	0	0	0	0	0	14.7	-0.41	0.723288	1	0	0	0	0	0	0	0	0	MS2	2023-01-19	146534	A	MS2NEG	1.0	0	0	0	138	4	2.28
ERS15562425	10.48	1	1	Kilifi	Kenya	Africa	0	0	0	0	0	0	0	0	1	0	0	1	0	0	0	0	0	0	0	13.35	-2.43	0.734247	1	0	0	0	0	0	0	0	0	MS2	2023-01-19	146534	A	MS2NEG	1.0	0	0	0	137	3.9	2.51
ERS15562426	13.63	2	1	Kilifi	Kenya	Africa	0	0	0	0	0	0	0	1	1	0	1	1	0	1	0	0	0	0	0	13.2	-1.02	0.756164	0	1	0	0	0	0	0	0	0	MS2	2023-01-19	146534	A	MS2NEG	1.0	0	0	0	134	3.8	2.43
ERS15562427	9.59	1	1	Kilifi	Kenya	Africa	0	0	0	0	0	0	0	0	1	0	1	1	0	0	0	0	0	0	0	14.25	1.68	0.772603	1	0	0	0	0	0	0	0	2	MS2	2023-01-19	146534	A	MS2NEG	1.0	0	0	0	133	3.4	2.08
ERS15562428	8.08	1	1	Kilifi	Kenya	Africa	0	0	0	0	0	0	0	0	1	0	1	1	0	0	0	0	0	0	0	14.95	0.15	0.79726	0	1	0	0	0	0	0	0	0	MS2	2023-01-19	146534	A	MS2NEG	1.0	0	0	0	131	4	2.32
ERS15562525	10.18	1	1	Karachi	Pakistan	Asia	0	0	0	0	1	0	0	0	1	0	0	0	0	0	0	0	0	1	0	12.5	-2.34	0.778082	1	0	0	0	0	0	0	0	0	MS5	2023-01-26	146534	A	MS5NEG	2.0	0	0	0	135	4.1	3.74955
ERS15562429	11.89	2	1	Kilifi	Kenya	Africa	0	0	0	0	0	0	0	0	1	0	1	1	1	1	0	1	0	0	0	13	-1.02	0.79726	1	0	0	0	0	0	0	0	0	MS2	2023-01-19	146534	A	MS2NEG	1.0	0	0	0	131	4.5	2.44
ERS15562430	11.6	1	1	Kilifi	Kenya	Africa	0	0	0	0	0	0	0	1	1	0	1	1	0	0	0	0	0	0	0	14.95	-0.29	0.810959	1	0	0	0	0	0	0	0	0	MS2	2023-01-19	146534	A	MS2NEG	1.0	0	0	1	133	3.9
ERS15562431	13.8	2	1	Kilifi	Kenya	Africa	0	0	0	0	0	0	0	0	1	0	1	1	1	0	0	0	0	1	0	12.55	-1.85	0.813699	1	0	0	0	0	0	0	0	2	MS2	2023-01-19	146534	A	MS2NEG	1.0	0	0	1	138	4.6	2.67
ERS15562432	11.37	2	0	Kilifi	Kenya	Africa	0	0	0	0	0	0	0	1	1	0	1	1	0	1	0	1	0	1	0	14.1	0.57	0.852055	0	0	0	0	0	0	0	1	0	MS2	2023-01-19	146534	A	MS2NEG	1.0	0	0	0	135	4.2	2.49
ERS15562433	23.69	1	1	Kilifi	Kenya	Africa	0	0	0	0	0	0	0	1	1	0	0	1	0	1	1	0	1	1	0	14.9	-0.71	0.852055	1	0	0	0	0	0	0	0	0	MS2	2023-01-19	146534	A	MS2NEG	1.0	0	0	0	132	3.7	2.2
ERS15562435	6.27	2	1	Kilifi	Kenya	Africa	0	0	0	0	0	0	0	0	1	0	0	0	0	0	0	0	0	0	0	12.4	-1.8	0.852055	1	0	0	0	0	0	0	0	2	MS2	2023-01-19	146534	A	MS2NEG	1.0	0	0	0	131	4.1	2.58
ERS15562434	17.94	2	0	Kilifi	Kenya	Africa	0	0	0	0	0	0	0	1	1	0	1	1	0	0	1	0	0	0	0	15.05	1.16	0.854795	0	0	0	0	0	0	0	1	0	MS2	2023-01-19	146534	A	MS2NEG	1.0	0	0	0	133	4.1	2.45
ERS15562436	6.77	2	1	Kilifi	Kenya	Africa	0	0	0	0	0	0	0	1	1	0	0	1	0	0	0	0	0	0	0	13.4	-0.33	0.857534	0	0	0	0	0	0	0	1	0	MS2	2023-01-19	146534	A	MS2NEG	1.0	0	0	0	133	3.8	2.18
ERS15562397	11.99	1	1	Kilifi	Kenya	Africa	0	0	0	0	0	0	0	1	1	0	0	0	0	0	0	0	0	0	0	12.6	-2.6	0.430137	1	0	0	0	0	0	0	0	0	MS1	2023-01-18	146534	A	MS1NEG	1.0	0	0	0
ERS15562437	19.65	1	1	Kilifi	Kenya	Africa	0	0	0	0	0	0	0	1	1	1	1	1	0	1	0	1	0	0	0	14.3	-0.65	0.868493	1	0	0	0	0	0	0	0	0	MS2	2023-01-19	146534	A	MS2NEG	1.0	0	0	0	133	4	2.42
ERS15562402	10.71	1	1	Kilifi	Kenya	Africa	0	0	0	0	0	0	0	0	1	0	1	0	1	0	0	0	0	0	0	13.4	-1.35	0.446575	0	0	1	0	0	0	0	1	0	MS1	2023-01-18	146534	A	MS1NEG	1.0	0	0	0
ERS15562526	3.84	2	1	Karachi	Pakistan	Asia	1	0	0	0	0	0	0	1	0	0	0	0	0	0	0	0	0	0	0	11.45	-1.41	0.813699	1	0	0	0	0	0	0	0	0	MS5	2023-01-26	146534	A	MS5NEG	2.0	0	0	1	136	5.2	3.67813
ERS15562438	21.78	1	0	Kilifi	Kenya	Africa	0	0	0	0	0	0	0	1	1	0	1	0	0	0	0	0	0	0	0	14.05	-0.44	0.873973	1	0	0	0	0	0	0	0	0	MS2	2023-01-19	146534	A	MS2NEG	1.0	0	0	0	135	4.2	1.93
ERS15562406	12.55	1	1	Kilifi	Kenya	Africa	0	0	0	0	0	0	0	1	0	1	1	1	1	0	0	0	0	0	0	15.45	0.03	0.509589	0	0	0	0	0	0	1	0	0	MS1	2023-01-18	146534	A	MS1NEG	1.0	0	0	0
ERS15562439	10.51	2	1	Kilifi	Kenya	Africa	0	0	0	0	0	0	0	0	1	0	1	1	0	0	0	0	0	0	0	15.45	0.87	0.884932	0	0	1	0	0	0	0	0	0	MS3	2023-01-23	146534	A	MS3NEG	1.0	0	0	0	134	4.4	2.36
ERS15562410	12.65	2	1	Kilifi	Kenya	Africa	0	0	0	0	0	0	0	0	1	0	0	1	0	0	0	0	1	0	0	13.9	0.81	0.682192	1	0	0	0	0	0	0	0	0	MS1	2023-01-18	146534	A	MS1NEG	1.0	0	0	0
ERS15562440	15.74	2	0	Kilifi	Kenya	Africa	0	0	0	0	0	0	0	1	1	0	1	1	0	0	0	0	0	0	0	14.1	0.02	0.890411	1	0	0	0	0	0	0	0	0	MS3	2023-01-23	146534	A	MS3NEG	1.0	0	0	0	133	4	2.62
ERS15562449	20.8	1	1	Mbagathi	Kenya	Africa	0	0	0	0	0	0	0	1	1	1	1	1	1	1	0	1	1	1	0	12.95	-0.25	0.49589	0	1	0	0	0	0	0	1	0	MS3	2023-01-23	146534	A	MS3NEG	1.0	0	0	0
ERS15562441	23	1	1	Kilifi	Kenya	Africa	0	0	0	1	0	0	0	1	1	0	1	0	1	0	0	0	0	0	0	14.95	0.02	0.906849	1	0	0	0	0	0	0	0	0	MS3	2023-01-23	146534	A	MS3NEG	1.0	0	0	1	140	3.4	2.42
ERS15562477	19.61	1	0	Mbagathi	Kenya	Africa	0	0	0	0	0	0	0	1	1	1	1	1	1	1	1	1	1	1	0	13.55	-1.12	0.684932	1	0	0	0	0	0	0	0	0	MS3	2023-01-23	146534	A	MS3NEG	1.0	0	0	0
ERS15562443	8.74	2	1	Mbagathi	Kenya	Africa	0	0	0	0	0	0	0	1	1	1	1	1	1	1	1	0	1	1	0	14.5	0.7	0.430137	1	0	0	0	0	0	0	0	0	MS3	2023-01-23	146534	A	MS3NEG	1.0	0	0	0
ERS15562445	7.56	2	1	Mbagathi	Kenya	Africa	0	0	0	0	0	0	0	1	1	1	1	0	1	1	0	0	1	1	0	13.15	-0.16	0.432877	0	1	0	0	0	0	0	0	0	MS3	2023-01-23	146534	A	MS3NEG	1.0	2	0	0
ERS15562488	6.96	1	0	Karachi	Pakistan	Asia	1	0	0	0	0	0	0	1	0	0	0	0	0	0	0	0	0	0	0	11.85	-1.98	0.953425	1	0	0	0	0	0	0	0	0	MS4	2023-01-25	146534	A	MS4NEG	1.0	0	0	0	142	4.1	3.60671
ERS15562442	13.99	2	1	Mbagathi	Kenya	Africa	0	0	0	0	0	0	0	1	1	1	1	1	1	1	0	1	1	1	0	13.75	-0.28	0.435616	0	1	0	0	0	0	0	0	0	MS3	2023-01-23	146534	A	MS3NEG	1.0	0	0	0
ERS15562490	7.79	1	0	Karachi	Pakistan	Asia	1	0	0	0	0	0	0	1	1	0	0	0	0	0	0	0	0	1	0	12.75	-1.17	0.608219	0	0	0	0	0	0	0	1	0	MS4	2023-01-25	146534	A	MS4NEG	1.0	0	0	1	144	5.2	3.53529
ERS15562494	15.37	2	1	Karachi	Pakistan	Asia	0	1	0	0	0	0	0	1	0	0	1	0	0	0	1	0	0	1	0	12.95	-0.57	0.120548	1	0	0	0	0	0	0	0	0	MS4	2023-01-25	146534	A	MS4NEG	1.0	0	0	0	144	4.2	3.42816
ERS15562527	3.52	1	1	Karachi	Pakistan	Asia	0	0	0	0	0	0	0	0	0	0	0	0	0	0	0	0	0	0	0	12.05	-3.24	0.849315	1	0	0	0	0	0	0	0	0	MS5	2023-01-26	146534	A	MS5NEG	2.0	0	0	0	134	5.8	3.71384
ERS15562528	10.61	2	0	Karachi	Pakistan	Asia	0	0	0	0	0	0	0	1	1	1	1	1	1	0	1	1	1	1	1	12.7	0.16	0.871233	1	0	0	0	0	0	0	0	0	MS5	2023-01-26	146534	A	MS5NEG	2.0	0	0	1	137	5.4	3.28532
ERS15562532	3.61	1	1	Karachi	Pakistan	Asia	0	0	0	0	0	0	0	1	0	0	0	0	0	0	0	0	0	0	0	12.5	-1.31	0.956164	1	0	0	0	0	0	0	0	0	MS6	2023-01-27	146534	A	MS6NEG	2.0	0	0	1	141	5.2	3.46387
ERS15562544	8.87	1	1	Karachi	Pakistan	Asia	0	0	0	0	0	0	0	1	1	0	1	0	1	0	0	1	1	1	1	13.55	-0.05	0.158904	1	0	0	0	0	0	0	0	0	MS6	2023-01-27	146534	A	MS6NEG	2.0	0	0	0	136	5	3.32103
ERS15562547	12.55	1	1	Karachi	Pakistan	Asia	0	0	0	0	0	0	0	1	1	0	0	1	0	0	0	0	0	0	0	12.5	-2.02	0.216438	0	1	0	0	0	0	0	0	0	MS6	2023-01-27	146534	A	MS6NEG	2.0	0	0	0	140	4.2	3.64242
ERS15562548	18.27	2	1	Karachi	Pakistan	Asia	0	0	0	0	0	0	0	1	1	0	0	1	0	0	0	0	0	0	0	14.95	2.79	0.238356	1	0	0	0	0	0	0	0	0	MS6	2023-01-27	146534	A	MS6NEG	2.0	0	0	0	138	4.7	3.53529
ERS15562550	9.72	2	1	Karachi	Pakistan	Asia	1	0	0	0	0	0	0	1	0	0	1	1	0	0	0	0	0	0	0	13.85	-0.39	0.315068	1	0	0	0	0	0	0	0	0	MS6	2023-01-27	146534	A	MS6NEG	2.0	0	0	0
ERS15562558	10.12	1	0	Karachi	Pakistan	Asia	1	0	0	0	0	0	0	1	1	0	0	1	0	0	0	0	0	0	0	14.05	-0.21	0.421918	1	0	0	0	0	0	0	0	0	MS7	2023-01-30	146534	B	MS7NEG	2.0	0	0	0	135	4.5	3.2139
ERS15562460	7.16	1	1	Kilifi	Kenya	Africa	0	0	0	0	0	0	0	0	1	0	0	0	0	0	0	0	0	0	0	13.85	2.56	0.232877	1	0	0	0	0	0	0	0	0	MS7	2023-01-30	146534	B	MS7NEG	2.0	0	0	0
ERS15562464	22.14	2	1	Kilifi	Kenya	Africa	0	0	0	0	0	0	0	0	1	0	1	0	0	0	0	0	0	1	0	13.25	-1.2	0.317808	1	0	0	0	0	0	0	0	0	MS7	2023-01-30	146534	B	MS7NEG	2.0	0	0	1	138.7	3.98	2.42
ERS15562512	4.27	1	1	Karachi	Pakistan	Asia	0	0	0	0	0	0	0	0	0	0	0	0	0	0	0	0	0	0	0	13.3	-0.51	0.378082	0	1	0	0	0	0	0	1	2	MS5	2023-01-26	146534	A	MS5NEG	2.0	0	0	0	138	4.8	3.46387
ERS15562467	23.39	2	0	Kilifi	Kenya	Africa	0	0	0	0	0	0	0	0	1	0	1	0	0	0	0	0	1	0	0	15	-1.22	0.345205	1	0	0	0	0	0	0	0	0	MS8	2023-01-31	146534	B	MS8NEG	2.0	0	0	0	134	3.73	2.16
ERS15562471	7.85	1	1	Kilifi	Kenya	Africa	0	0	0	0	0	0	0	0	1	0	0	0	0	0	0	0	0	0	0	13.9	-0.49	0.391781	1	0	0	0	0	0	0	0	0	MS8	2023-01-31	146534	B	MS8NEG	2.0	0	0	0	135.9	5.74	2.24
ERS15562474	10.28	2	1	Kilifi	Kenya	Africa	0	0	0	0	0	0	0	0	1	0	1	1	0	0	0	0	0	0	0	14.05	-0.13	0.408219	1	0	0	0	0	0	0	0	0	MS8	2023-01-31	146534	B	MS8NEG	2.0	0	0	0	138.2	4.17	2.4
ERS15562589	9.43	2	1	Mbagathi	Kenya	Africa	0	0	0	0	0	0	0	1	1	1	0	0	1	0	0	0	1	1	0	15.05	1.04	0.731507	0	0	1	0	0	0	0	0	0	MS9	2023-02-02	146534	B	MS9NEG	29.0	0	0	0	138	4.3	2.52
ERS15562626	20.47	1	0	Mbagathi	Kenya	Africa	0	0	0	0	0	0	0	1	1	1	1	1	1	1	1	1	1	1	0	16.85	2.41	0.279452	1	0	0	0	0	0	0	0	0	MS10	2023-02-03	146534	B	MS10NEG	29.0	0	0	0	136	3.8	2.2
ERS15562643	6.7	1	1	Kampala	Uganda	Africa	0	0	0	0	0	0	0	1	1	1	1	1	1	1	0	1	1	1	0	13.05	-1.92	0.893151	1	0	0	0	0	0	0	0	0	MS11	2023-02-13	146534	D	MS11NEG	34.0	0	0	0	152	5.89	2.58
ERS15562648	10.64	2	1	Kampala	Uganda	Africa	0	0	0	0	0	0	0	1	1	1	0	1	1	1	0	1	1	1	0	11.8	-0.74	0.827397	1	0	0	0	0	0	0	0	1	MS11	2023-02-13	146534	D	MS11NEG	34.0	0	0	0	135	3.9	2.53
ERS15562667	12.48	2	0	Kampala	Uganda	Africa	0	0	0	0	0	0	0	1	1	0	0	0	1	0	1	0	1	1	0	13.5	-1.1	0.6	1	0	0	0	0	0	0	0	0	MS12	2023-02-14	146534	D	MS12NEG	36.0	0	0	1	137	4.1	2.39
ERS15562666	4.27	1	1	Kampala	Uganda	Africa	0	0	0	0	0	0	0	1	0	0	0	0	0	0	0	0	0	0	0	14.8	2.08	0.545205	1	0	0	0	0	0	0	0	0	MS12	2023-02-14	146534	D	MS12NEG	36.0	0	0	1	144	5.1	2.67
ERS15562670	2.37	2	1	Kampala	Uganda	Africa	0	0	0	0	0	0	0	0	0	0	0	0	0	0	0	0	0	1	0	11.6	-1.4	0.427397	1	0	0	0	0	0	0	0	0	MS12	2023-02-14	146534	D	MS12NEG	36.0	0	0	0	133	5.8	2.32
ERS15562514	10.18	1	1	Karachi	Pakistan	Asia	1	0	0	0	0	0	0	0	1	0	0	0	0	0	0	0	0	0	0	10.7	-3.58	0.50411	0	1	0	0	0	0	0	0	0	MS5	2023-01-26	146534	A	MS5NEG	2.0	0	0	1	139	4.6	3.35674
ERS15562673	13.76	1	0	Kampala	Uganda	Africa	0	0	0	0	0	0	0	1	0	0	0	0	0	0	0	0	0	1	0	12.25	-1.91	0.391781	0	0	0	0	0	0	1	0	0	MS12	2023-02-14	146534	D	MS12NEG	36.0	0	0	0	133	2.5	2.28
ERS15562682	4.47	2	1	Kampala	Uganda	Africa	0	0	0	0	0	0	0	0	0	0	0	0	0	0	0	0	0	0	0	12.85	0.37	0.106849	1	0	0	0	0	0	0	0	0	MS13	2023-02-16	146534	D	MS13NEG	36.0	0	0	0
ERS15562684	5.26	1	1	Kampala	Uganda	Africa	0	0	0	0	0	0	0	0	0	0	0	0	0	0	0	0	0	0	0	14.2	0.71	0.682192	1	0	0	0	0	0	0	0	0	MS13	2023-02-16	146534	D	MS13NEG	38.0	0	0	0	132	2.6	2.63
ERS15562685	12.71	1	1	Kampala	Uganda	Africa	0	0	0	0	0	0	0	1	1	1	1	1	1	1	1	1	1	1	0	16	1.32	0.282192	1	0	0	0	0	0	0	0	0	MS13	2023-02-16	146534	D	MS13NEG	38.0	0	0	0	137	5.3	2.46
ERS15562518	3.09	2	1	Karachi	Pakistan	Asia	0	0	0	0	1	0	0	1	0	0	0	0	0	0	0	0	0	0	0	12.05	-2.02	0.679452	0	0	0	0	0	0	0	0	0	MS5	2023-01-26	146534	A	MS5NEG	2.0	0	0	0	143	6.3	3.60671
ERS15562391	8.94	2	1	Kilifi	Kenya	Africa	0	0	0	0	0	0	0	0	1	0	0	0	0	0	0	0	0	0	0	13.25	-0.87	0.0164384	1	0	0	0	0	0	0	0	0	MS1	2023-01-18	146534	A	MS1NEG	1.0	0	0	0
ERS15562393	23.92	1	0	Kilifi	Kenya	Africa	0	0	0	0	0	0	0	1	1	0	0	0	0	1	0	0	1	0	0	14.05	-1.4	0.0164384	0	0	0	0	0	0	1	0	0	MS1	2023-01-18	146534	A	MS1NEG	1.0	0	0	0
ERS15562392	9.36	1	1	Kilifi	Kenya	Africa	0	0	0	0	0	0	0	0	1	0	0	0	0	0	0	0	0	0	0	14.55	-1.06	0.265753	1	0	0	0	0	0	0	0	0	MS1	2023-01-18	146534	A	MS1NEG	1.0	0	0	0
ERS15562475	10.71	2	1	Kilifi	Kenya	Africa	0	0	0	0	0	0	0	0	1	0	0	1	0	0	0	0	0	0	0	13.5	-0.73	0.408219	0	0	0	0	0	1	0	0	0	MS8	2023-01-31	146534	B	MS8NEG	2.0	0	0	0	132.9	6.8	2.27
ERS15562450	12.81	2	1	Mbagathi	Kenya	Africa	0	0	0	0	0	0	0	1	1	1	1	1	1	0	1	0	1	0	0	14.35	0.47	0.254795	1	0	0	0	0	0	0	0	0	MS3	2023-01-23	146534	A	MS3NEG	1.0	0	0	0
ERS15562522	15.34	2	0	Karachi	Pakistan	Asia	0	0	0	0	0	0	0	0	1	1	1	1	1	1	1	1	1	1	1	12.45	-1.39	0.761644	0	0	0	0	0	0	1	0	0	MS5	2023-01-26	146534	A	MS5NEG	2.0	0	0	0	140	4.8	3.67813
ERS15562523	8.48	2	1	Karachi	Pakistan	Asia	0	0	0	1	0	0	0	1	1	0	0	0	1	0	0	1	1	1	1	12.65	-1.48	0.769863	1	0	0	0	0	0	0	0	1	MS5	2023-01-26	146534	A	MS5NEG	2.0	0	0	0	141	5.2	3.53529
ERS15562618	15.28	2	1	Mbagathi	Kenya	Africa	0	0	0	0	0	0	0	1	1	1	1	1	1	0	1	1	1	1	0	12.75	-1.26	0.257534	0	0	0	0	0	0	0	0	0	MS10	2023-02-03	146534	B	MS10NEG	29.0	0	0	0	140	4.2	2.3
ERS15562619	20.14	2	1	Mbagathi	Kenya	Africa	0	0	0	0	0	0	0	1	1	1	1	1	1	0	1	1	1	1	0	14.95	-0.79	0.268493	0	1	0	0	0	0	0	0	0	MS10	2023-02-03	146534	B	MS10NEG	29.0	0	0	0	142	4.9	2.3
ERS15562531	16.2	1	1	Karachi	Pakistan	Asia	0	0	0	0	0	0	0	1	1	1	1	1	1	1	1	1	1	1	1	12.95	-0.49	0.893151	1	0	0	0	0	0	0	0	0	MS6	2023-01-27	146534	A	MS6NEG	2.0	0	0	1	138	4.3	3.46387
ERS15562529	18.13	1	0	Karachi	Pakistan	Asia	0	0	0	0	0	0	0	1	1	1	0	1	1	0	0	0	1	1	1	15.55	0.13	0.90411	1	0	0	0	0	0	0	0	0	MS6	2023-01-27	146534	A	MS6NEG	2.0	0	0	1	140	4.9	3.42816
ERS15562620	13.99	2	1	Mbagathi	Kenya	Africa	0	0	0	0	0	0	0	1	1	1	1	1	1	1	1	1	1	1	0	12.05	-2.36	0.268493	1	0	0	0	0	0	0	0	0	MS10	2023-02-03	146534	B	MS10NEG	29.0	0	0	0	139	4.2	2.12
ERS15562621	8.44	1	1	Mbagathi	Kenya	Africa	0	0	0	0	0	0	0	1	1	1	1	1	1	0	0	1	1	1	1	17.15	1.94	0.271233	0	1	0	0	0	0	0	0	0	MS10	2023-02-03	146534	B	MS10NEG	29.0	0	0	0
ERS15562530	18.4	2	1	Karachi	Pakistan	Asia	0	0	0	0	0	0	0	0	1	0	1	1	0	0	0	0	0	0	0	12.75	-0.51	0.926027	0	0	0	0	0	0	0	0	0	MS6	2023-01-27	146534	A	MS6NEG	2.0	0	0	0	139	5.5	3.571
ERS15562533	23.03	1	1	Karachi	Pakistan	Asia	1	0	0	0	0	0	0	1	1	1	1	1	1	1	1	1	1	1	1	15.15	0.29	0.956164	1	0	0	0	0	0	0	0	0	MS6	2023-01-27	146534	A	MS6NEG	2.0	0	0	0	141	4.9	3.49958
ERS15562451	18.43	2	0	Mbagathi	Kenya	Africa	0	0	0	0	0	0	0	1	1	1	1	1	1	1	1	1	1	1	0	15.2	0.26	0.506849	0	1	0	0	0	0	0	0	0	MS3	2023-01-23	146534	A	MS3NEG	1.0	3	0	0
ERS15562622	23.85	2	0	Mbagathi	Kenya	Africa	0	0	0	0	0	0	0	1	1	1	1	1	1	1	1	1	1	1	1	13.85	-0.35	0.271233	0	0	0	1	0	0	0	0	0	MS10	2023-02-03	146534	B	MS10NEG	29.0	0	0	0	136	3.6	2.16
ERS15562624	16.26	1	1	Mbagathi	Kenya	Africa	0	0	0	0	0	0	0	1	1	1	1	1	1	1	1	0	1	1	0	14.55	0.75	0.273973	0	1	0	0	0	0	0	0	0	MS10	2023-02-03	146534	B	MS10NEG	29.0	0	0	0	146	4.6	2.15
ERS15562534	4.4	1	1	Karachi	Pakistan	Asia	0	0	0	0	0	0	0	0	1	1	1	1	1	1	1	1	1	1	1	12.25	-3.21	0.956164	1	0	0	0	0	0	0	0	0	MS6	2023-01-27	146534	A	MS6NEG	2.0	0	0	1	139	5.6	3.49958
ERS15562535	2.27	1	1	Karachi	Pakistan	Asia	0	0	0	0	0	0	0	0	0	0	0	0	0	0	0	0	0	0	0	11.55	-0.44	0.967123	1	0	0	0	0	0	0	0	0	MS6	2023-01-27	146534	A	MS6NEG	2.0	0	0	0	135	6.7	3.42816
ERS15562623	9.56	1	1	Mbagathi	Kenya	Africa	0	0	0	0	0	0	0	1	1	1	1	1	1	1	1	1	1	1	0	15.5	0.68	0.273973	1	0	0	0	0	0	0	0	0	MS10	2023-02-03	146534	B	MS10NEG	29.0	0	0	0	148	5.5	1.95
ERS15562625	11.4	1	1	Mbagathi	Kenya	Africa	0	0	0	0	0	0	0	1	1	1	1	1	1	0	0	1	1	1	0	14.25	0.99	0.279452	1	0	0	0	0	0	0	0	0	MS10	2023-02-03	146534	B	MS10NEG	29.0	0	0	0	145	4.1	2.27
ERS15562536	10.41	2	1	Karachi	Pakistan	Asia	0	0	0	0	0	0	0	0	0	0	0	0	0	0	0	0	0	1	1	12.95	-0.95	0.967123	1	0	0	0	0	0	0	0	0	MS6	2023-01-27	146534	A	MS6NEG	2.0	0	0	0	136	5	3.46387
ERS15562627	11.17	2	1	Mbagathi	Kenya	Africa	0	0	0	0	0	0	0	1	1	1	1	1	1	1	0	0	1	1	0	15.95	0.78	0.29589	1	0	0	0	0	0	0	0	0	MS10	2023-02-03	146534	B	MS10NEG	29.0	0	0	1	161	4.8	2.35
ERS15562537	22.5	2	0	Karachi	Pakistan	Asia	0	0	1	0	0	0	0	1	0	0	0	1	0	0	0	0	0	0	0	12.85	-0.72	0.972603	1	0	0	0	0	0	0	0	0	MS6	2023-01-27	146534	A	MS6NEG	2.0	0	0	0	138	4.9	3.64242
ERS15562628	19.74	2	1	Mbagathi	Kenya	Africa	0	0	0	0	0	0	0	1	1	1	1	1	1	1	1	1	1	1	0	13.85	-0.46	0.356164	0	1	0	0	0	0	0	0	0	MS10	2023-02-03	146534	B	MS10NEG	29.0	0	0	0	138	4.5	2.33
ERS15562573	16.82	2	1	Kilifi	Kenya	Africa	0	0	0	0	0	0	0	0	1	0	0	1	0	0	0	0	1	1	0	13.4	-1.08	0.413699	1	0	0	0	0	0	0	0	0	MS8	2023-01-31	146534	B	MS8NEG	2.0	0	0	0	140	4.8	2.43
ERS15562538	5.85	1	1	Karachi	Pakistan	Asia	1	0	0	0	0	0	0	1	1	0	0	0	0	0	0	0	0	0	0	12.45	-0.37	0.115068	0	1	0	0	0	0	1	0	0	MS6	2023-01-27	146534	A	MS6NEG	2.0	0	0	0	140	5.5	3.53529
ERS15562629	11.6	2	1	Mbagathi	Kenya	Africa	0	0	0	0	0	0	0	1	1	1	1	1	1	1	1	1	1	1	0	13.55	-0.87	0.356164	1	0	0	0	0	0	0	0	0	MS10	2023-02-03	146534	B	MS10NEG	29.0	0	0	0	137	4.2	2.42
ERS15562539	21.09	1	1	Karachi	Pakistan	Asia	1	0	0	0	0	0	0	1	0	0	1	0	0	0	0	0	0	0	0	13.35	-1.24	0.117808	1	0	0	0	0	0	0	0	0	MS6	2023-01-27	146534	A	MS6NEG	2.0	0	0	0	142	4.4	3.49958
ERS15562540	13.67	1	1	Karachi	Pakistan	Asia	0	0	0	0	0	0	0	1	1	0	1	1	1	0	0	1	0	1	1	13.15	-1.72	0.128767	1	0	0	0	0	0	0	0	0	MS6	2023-01-27	146534	A	MS6NEG	2.0	0	0	0	136	4.8	3.28532
ERS15562630	8.71	2	1	Kampala	Uganda	Africa	0	0	0	0	0	0	0	1	1	1	0	1	0	0	0	1	0	1	0	12.9	-0.64	0.473973	0	0	0	0	0	0	0	1	0	MS10	2023-02-03	146534	B	MS10NEG	32.0	0	0	0	135	4.6	2.44
ERS15562631	8.57	2	1	Kampala	Uganda	Africa	0	0	0	0	0	0	0	0	1	1	0	1	0	0	0	0	0	0	0	12.25	-1.68	0.457534	0	1	0	0	0	0	0	0	0	MS11	2023-02-13	146534	D	MS11NEG	32.0	0	0	0	136	4.8	2.59
ERS15562543	9.13	1	1	Karachi	Pakistan	Asia	0	0	0	0	0	0	0	1	1	1	0	1	1	0	0	1	1	1	1	12.4	-2.19	0.136986	0	0	0	0	0	0	1	0	0	MS6	2023-01-27	146534	A	MS6NEG	2.0	0	0	0	138	4.3	3.67813
ERS15562541	3.75	1	1	Karachi	Pakistan	Asia	0	0	0	0	0	0	0	0	0	0	0	0	0	0	0	0	0	0	0	14.25	1.16	0.139726	0	1	0	0	0	0	0	0	0	MS6	2023-01-27	146534	A	MS6NEG	2.0	0	0	0	140	5.9	3.60671
ERS15562632	8.38	1	1	Kampala	Uganda	Africa	0	0	0	0	0	0	0	0	1	0	0	0	1	1	1	0	0	0	0	14.2	0.45	0.454795	1	0	0	0	0	0	0	0	0	MS11	2023-02-13	146534	D	MS11NEG	32.0	0	0	0	134	5.3	2.55
ERS15562633	16.79	2	0	Kampala	Uganda	Africa	0	0	0	0	0	0	0	0	1	1	0	1	1	1	0	0	1	1	0	13.05	-0.74	0.435616	0	1	0	0	0	0	0	0	0	MS11	2023-02-13	146534	D	MS11NEG	32.0	0	0	0	141	4.4	2.44
ERS15562572	12.35	1	1	Kilifi	Kenya	Africa	0	0	0	0	0	0	0	0	1	0	1	0	0	0	0	0	0	0	0	13.5	-1.02	0.424658	1	0	0	0	0	0	0	0	0	MS8	2023-01-31	146534	B	MS8NEG	2.0	0	0	0	135	3.9	1.98
ERS15562542	2.07	2	1	Karachi	Pakistan	Asia	1	0	0	0	0	0	0	1	0	0	0	0	0	0	0	0	0	0	0	12.45	-0.29	0.153425	0	0	0	0	0	0	1	0	0	MS6	2023-01-27	146534	A	MS6NEG	2.0	0	0	0	139	4.3	3.571
ERS15562545	20.17	1	0	Karachi	Pakistan	Asia	1	0	0	0	0	0	0	1	1	1	0	0	1	0	0	1	1	1	1	13.35	-0.79	0.167123	1	0	0	0	0	0	0	0	0	MS6	2023-01-27	146534	A	MS6NEG	2.0	0	0	1	140	5.1	3.32103
ERS15562634	12.65	2	1	Kampala	Uganda	Africa	0	0	0	0	0	0	0	1	1	1	0	0	1	0	0	0	0	0	0	15.45	1.31	0.928767	0	1	0	0	1	0	0	0	0	MS11	2023-02-13	146534	D	MS11NEG	32.0	0	0	0	144	4.96	2.49
ERS15562635	14.36	2	1	Kampala	Uganda	Africa	0	0	0	0	0	0	0	1	1	1	1	1	1	1	1	1	1	1	0	13.2	0.35	0.887671	0	1	0	0	0	0	0	0	0	MS11	2023-02-13	146534	D	MS11NEG	32.0	0	0	0	132	4	2.39
ERS15562546	6.5	1	1	Karachi	Pakistan	Asia	1	0	0	0	0	0	0	1	1	0	0	0	0	0	0	0	0	0	0	12.55	0.08	0.186301	0	1	1	0	0	0	0	0	0	MS6	2023-01-27	146534	A	MS6NEG	2.0	0	0	0	139	5.6	3.64242
ERS15562549	15.11	1	1	Karachi	Pakistan	Asia	0	0	1	0	0	0	0	0	1	0	1	0	0	0	0	0	0	1	1	15.5	0.96	0.273973	1	0	0	0	0	0	0	0	0	MS6	2023-01-27	146534	A	MS6NEG	2.0	0	0	0	138	5.4	3.42816
ERS15562636	18.59	1	0	Kampala	Uganda	Africa	0	0	0	0	0	0	0	1	1	1	1	1	1	1	1	1	0	1	0	13.5	-1.94	0.778082	0	0	1	0	0	0	0	0	0	MS11	2023-02-13	146534	D	MS11NEG	32.0	0	0	0	131	5.2	2.38
ERS15562637	12.45	1	1	Kampala	Uganda	Africa	0	1	0	1	0	0	0	1	1	0	0	0	1	0	0	0	1	0	0	13.55	0.05	0.282192	0	1	0	0	0	0	0	0	0	MS11	2023-02-13	146534	D	MS11NEG	32.0	0	0	1	134	4	2.29
ERS15562551	19.58	2	0	Karachi	Pakistan	Asia	0	0	1	0	0	0	0	1	1	1	1	1	1	1	1	1	1	1	1	13.35	0.45	0.312329	1	0	0	0	0	0	0	0	1	MS6	2023-01-27	146534	A	MS6NEG	2.0	0	0	0	137	4.2	3.74955
ERS15562552	6.67	1	1	Karachi	Pakistan	Asia	1	0	0	0	0	0	0	1	0	0	0	0	0	0	0	0	0	0	0	12.85	-6.12	0.356164	0	0	0	0	0	0	1	0	0	MS6	2023-01-27	146534	A	MS6NEG	2.0	0	0	0	138	5.4	3.42816
ERS15562452	14.09	1	1	Mbagathi	Kenya	Africa	0	0	0	0	0	0	0	1	1	1	1	1	1	1	0	1	1	1	1	14.35	0.16	0.512329	0	0	0	0	0	0	0	1	0	MS3	2023-01-23	146534	A	MS3NEG	1.0	0	0	1
ERS15562638	3.58	1	1	Kampala	Uganda	Africa	0	1	0	0	0	0	0	0	0	0	0	0	0	0	0	0	0	0	0	12.8	0.47	0.273973	0	0	1	0	0	0	1	0	0	MS11	2023-02-13	146534	D	MS11NEG	32.0	0	0	0	131	5.3	2.49
ERS15562639	11.01	2	1	Kampala	Uganda	Africa	0	0	0	0	0	0	0	0	1	1	0	0	1	0	0	0	0	0	0	15.1	2.15	0.2	0	1	0	0	0	0	0	0	0	MS11	2023-02-13	146534	D	MS11NEG	32.0	0	0	0	144	5.3	2.65
ERS15562553	22.73	2	0	Karachi	Pakistan	Asia	1	0	0	0	0	0	0	1	1	0	0	0	0	1	0	1	0	0	0	12.35	-3.22	0.364384	1	0	0	0	0	0	0	0	0	MS7	2023-01-30	146534	B	MS7NEG	2.0	0	0	0	137	4.8	3.49958
ERS15562554	5.16	1	1	Karachi	Pakistan	Asia	0	0	1	0	0	0	0	1	1	0	0	0	0	0	0	0	0	0	0	13.55	-0.47	0.367123	1	0	0	0	0	0	0	0	0	MS7	2023-01-30	146534	B	MS7NEG	2.0	0	0	0	141	5.2	3.71384
ERS15562640	5.49	1	1	Kampala	Uganda	Africa	0	1	0	0	0	0	0	0	0	0	0	0	0	0	0	0	0	0	0	15.3	2.66	0.167123	0	0	0	1	0	0	0	0	0	MS11	2023-02-13	146534	D	MS11NEG	32.0	3	0	0	137	4.6	2.39
ERS15562641	8.31	2	0	Kampala	Uganda	Africa	0	0	0	0	0	0	0	1	1	0	0	0	1	1	0	0	0	0	0	12	0	0.89589	1	0	0	0	0	0	0	0	0	MS11	2023-02-13	146534	D	MS11NEG	32.0	0	0	0	132	4.3	2.44
ERS15562555	2.96	1	1	Karachi	Pakistan	Asia	0	0	0	0	0	0	0	1	0	0	0	0	0	0	0	0	0	0	0	11.65	-1.4	0.369863	1	0	0	0	0	0	0	0	0	MS7	2023-01-30	146534	B	MS7NEG	2.0	0	0	0	136	5.3	3.42816
ERS15562642	7.46	2	1	Kampala	Uganda	Africa	0	0	0	0	0	1	0	1	1	1	0	0	0	0	0	1	0	1	0	15.35	1.94	0.832877	1	0	0	0	0	0	0	0	0	MS11	2023-02-13	146534	D	MS11NEG	33.0	0	0	0	151	6.1	2.62
ERS15562557	16.59	2	1	Karachi	Pakistan	Asia	0	0	0	0	0	0	0	1	0	0	0	0	0	0	0	0	0	0	0	11.85	-2.27	0.386301	0	0	0	0	0	0	1	0	0	MS7	2023-01-30	146534	B	MS7NEG	2.0	0	0	0	139	3.9	3.53529
ERS15562644	7.72	2	0	Kampala	Uganda	Africa	0	0	0	0	0	0	0	1	1	1	0	0	1	1	1	0	1	1	0	13	-1.32	0.893151	0	1	0	0	0	0	0	1	0	MS11	2023-02-13	146534	D	MS11NEG	34.0	0	0	0	143	4.31	2.28
ERS15562453	21.12	2	0	Mbagathi	Kenya	Africa	0	0	0	0	0	0	0	1	1	1	1	1	1	1	1	0	1	1	0	15.25	0.31	0.550685	0	0	0	0	0	0	0	1	0	MS3	2023-01-23	146534	A	MS3NEG	1.0	0	0	0
ERS15562556	20.43	1	0	Karachi	Pakistan	Asia	1	0	0	0	0	0	0	1	1	0	1	1	0	0	0	0	0	0	0	15.5	0.97	0.389041	1	0	0	0	0	0	0	0	1	MS7	2023-01-30	146534	B	MS7NEG	2.0	0	0	0	137	4.4	3.39245
ERS15562645	4.01	1	1	Kampala	Uganda	Africa	0	0	0	0	0	0	0	0	0	0	0	0	0	0	0	0	0	0	0	13.6	0.82	0.868493	1	0	0	0	0	0	0	0	0	MS11	2023-02-13	146534	D	MS11NEG	34.0	0	0	0	132	5.3	2.65
ERS15562559	16.39	2	1	Karachi	Pakistan	Asia	0	0	0	0	0	0	0	1	1	0	0	1	0	0	0	0	0	0	0	12.75	-1.1	0.391781	0	0	0	0	0	0	1	0	1	MS7	2023-01-30	146534	B	MS7NEG	2.0	0	0	0	136	4.8	3.39245
ERS15562646	8.77	1	1	Kampala	Uganda	Africa	0	0	0	1	0	0	0	0	1	1	0	0	1	0	0	1	0	0	0	14.5	1.74	0.846575	0	1	0	0	0	0	0	0	0	MS11	2023-02-13	146534	D	MS11NEG	34.0	0	0	0	134	4.4	2.34
ERS15562560	4.11	1	1	Karachi	Pakistan	Asia	0	0	0	0	0	0	0	1	0	0	0	0	0	0	0	0	0	0	0	13	-0.17	0.493088	0	0	0	0	0	1	0	0	0	MS7	2023-01-30	146534	B	MS7NEG	2.0	0	0	1
ERS15562647	2.56	2	1	Kampala	Uganda	Africa	0	0	0	0	0	0	0	1	0	0	0	0	0	0	0	0	0	0	0	13.5	2.09	0.846575	0	0	0	0	0	0	0	1	0	MS11	2023-02-13	146534	D	MS11NEG	34.0	0	0	0	131	5.3	2.57
ERS15562561	15.87	1	1	Kilifi	Kenya	Africa	0	0	0	0	0	0	0	1	1	0	1	0	1	0	0	0	0	0	0	14.4	-1.08	0.164384	1	0	0	0	0	0	0	0	0	MS7	2023-01-30	146534	B	MS7NEG	2.0	0	0	0	136	4.3	2.52
ERS15562562	12.78	1	1	Kilifi	Kenya	Africa	0	0	0	0	0	0	0	1	1	0	0	1	0	0	0	0	0	0	0	15.85	0.71	0.178082	1	0	0	0	0	0	0	0	0	MS7	2023-01-30	146534	B	MS7NEG	2.0	0	0	0	137	4.4	2.64
ERS15562649	4.17	2	1	Kampala	Uganda	Africa	0	0	0	0	0	0	0	0	0	0	0	0	0	0	0	0	0	0	0	13.5	0.3	0.846575	0	1	0	0	0	0	0	0	0	MS11	2023-02-13	146534	D	MS11NEG	34.0	0	0	0	130	5.7	2.66
ERS15562650	20.73	1	0	Kampala	Uganda	Africa	0	0	0	0	0	0	0	1	1	0	0	0	1	0	0	1	0	1	0	14.05	-0.66	0.827397	0	0	1	0	0	0	0	0	0	MS11	2023-02-13	146534	D	MS11NEG	34.0	0	0	0	131	4	2.58
ERS15562574	8.02	2	1	Kilifi	Kenya	Africa	0	0	0	0	0	0	0	0	1	0	0	0	0	0	0	0	0	0	0	12.2	-1.75	0.432877	0	1	0	0	0	0	0	0	0	MS8	2023-01-31	146534	B	MS8NEG	2.0	4	0	0	136	4	2.39
ERS15562563	19.15	1	0	Kilifi	Kenya	Africa	0	0	0	0	0	0	0	0	1	0	1	0	1	0	0	0	0	1	0	14.1	-0.05	0.180822	1	0	0	0	0	0	0	0	0	MS7	2023-01-30	146534	B	MS7NEG	2.0	0	0	0	139	4.6	2.31
ERS15562565	23.09	1	0	Kilifi	Kenya	Africa	0	0	0	0	0	0	0	1	1	0	1	1	1	0	1	0	0	1	0	14.55	-0.56	0.2	1	0	0	0	0	0	0	0	0	MS7	2023-01-30	146534	B	MS7NEG	2.0	0	0	0	136	3.9
ERS15562651	14.62	1	0	Kampala	Uganda	Africa	0	0	0	0	0	0	0	1	1	1	1	1	1	1	0	0	0	1	0	13.3	-0.45	0.813699	0	0	1	0	0	1	0	1	0	MS11	2023-02-13	146534	D	MS11NEG	34.0	0	0	0	132	3.1	2.27
ERS15562653	4.6	1	1	Kampala	Uganda	Africa	0	0	0	0	0	0	0	0	0	0	0	0	0	0	0	0	0	0	0	14	0.87	0.79726	1	0	0	0	0	0	0	0	0	MS11	2023-02-13	146534	D	MS11NEG	34.0	0	0	0	129	4.6	2.6
ERS15562564	19.55	2	0	Kilifi	Kenya	Africa	0	0	0	0	0	0	0	0	1	0	1	1	1	0	0	0	0	1	0	12.7	-1.49	0.20274	1	0	0	0	0	0	0	0	0	MS7	2023-01-30	146534	B	MS7NEG	2.0	0	0	0	136	4.2	2.32
ERS15562567	16.29	1	1	Kilifi	Kenya	Africa	0	0	0	0	0	0	0	0	1	0	1	0	0	1	0	0	0	0	0	14.1	-0.75	0.20274	1	0	0	0	0	0	0	0	0	MS7	2023-01-30	146534	B	MS7NEG	2.0	0	0	0	134	3.9	2.35
ERS15562652	18.2	2	0	Kampala	Uganda	Africa	0	0	0	0	0	0	0	1	1	1	0	0	0	0	1	0	0	0	0	14.5	-0.26	0.756164	1	0	0	0	0	0	0	0	0	MS11	2023-02-13	146534	D	MS11NEG	34.0	0	0	0	132	3.7	2.3
ERS15562654	19.02	2	0	Kampala	Uganda	Africa	0	0	0	0	0	0	0	1	1	1	0	0	1	1	1	0	0	1	0	15.5	1.35	0.750685	1	0	0	0	0	0	0	0	0	MS11	2023-02-13	146534	D	MS11NEG	34.0	0	0	0	134	4.5	2.36
ERS15562566	21.48	2	1	Kilifi	Kenya	Africa	0	0	0	0	0	0	0	0	1	0	1	0	0	0	0	0	0	0	0	13.35	-1.66	0.213699	1	0	0	0	0	0	0	0	0	MS7	2023-01-30	146534	B	MS7NEG	2.0	0	0	0	135	3.3	2.58
ERS15562568	19.68	1	1	Kilifi	Kenya	Africa	0	0	0	0	0	0	0	0	1	1	1	1	1	1	0	0	1	1	0	14.45	-1.91	0.219178	0	0	0	0	0	0	0	1	0	MS7	2023-01-30	146534	B	MS7NEG	2.0	0	0	0	136.1	3.5	2.58
ERS15562575	18	1	1	Kilifi	Kenya	Africa	0	0	0	0	0	0	0	0	1	0	1	1	0	0	0	0	0	0	0	16.15	1.33	0.432877	1	0	0	0	0	0	0	0	0	MS8	2023-01-31	146534	B	MS8NEG	2.0	0	0	0	137	3.5	2.32
ERS15562458	10.18	2	1	Kilifi	Kenya	Africa	0	0	0	0	0	0	0	0	1	0	0	0	0	0	0	0	0	0	0	13.9	-0.57	0.219178	1	0	0	0	0	0	0	0	0	MS7	2023-01-30	146534	B	MS7NEG	2.0	0	0	0	142.2	4.26	2.46
ERS15562462	20.6	1	0	Kilifi	Kenya	Africa	0	0	0	0	0	0	0	0	1	0	1	0	0	0	0	0	0	1	0	12.15	-2.13	0.232877	1	0	0	0	0	0	0	0	0	MS7	2023-01-30	146534	B	MS7NEG	2.0	0	0	0	136	3.9	1.89
ERS15562461	20.6	1	0	Kilifi	Kenya	Africa	0	0	0	0	0	0	0	0	1	0	1	1	1	1	1	1	0	1	0	14.25	-0.54	0.235616	0	0	0	0	0	0	1	0	0	MS7	2023-01-30	146534	B	MS7NEG	2.0	0	0	0	137	3.7	2.14
ERS15562463	22.93	1	0	Kilifi	Kenya	Africa	0	1	0	0	0	0	0	1	1	0	1	0	1	1	1	0	1	0	0	13.4	-0.74	0.238356	0	1	0	0	0	0	0	1	0	MS7	2023-01-30	146534	B	MS7NEG	2.0	0	0	0	141	3.6	2.38
ERS15562465	11.99	1	1	Kilifi	Kenya	Africa	0	0	0	0	0	0	0	0	1	0	1	0	0	0	0	0	0	1	0	15.1	-0.02	0.336986	1	0	0	0	0	0	0	0	2	MS7	2023-01-30	146534	B	MS7NEG	2.0	0	0	0	136.8	3.26	2.39
ERS15562466	13.53	1	1	Kilifi	Kenya	Africa	0	0	0	0	0	0	0	0	1	0	1	0	0	0	0	0	0	0	0	12.35	-2.37	0.336986	1	0	0	0	0	0	0	0	0	MS7	2023-01-30	146534	B	MS7NEG	2.0	0	0	0	132.5	5.53	2.36
ERS15562468	6.9	1	1	Kilifi	Kenya	Africa	0	0	0	0	0	0	0	1	0	1	0	0	0	0	0	0	0	0	0	16.2	2.14	0.350685	0	1	0	0	0	0	0	0	0	MS8	2023-01-31	146534	B	MS8NEG	2.0	4	0	0	131.9	4.29	2.32
ERS15562469	14.75	1	1	Kilifi	Kenya	Africa	0	0	0	0	0	0	0	1	1	0	1	1	0	0	0	0	1	1	0	14.95	-0.46	0.353425	1	0	0	0	0	0	0	0	0	MS8	2023-01-31	146534	B	MS8NEG	2.0	0	0	0	137.6	3.85	2.33
ERS15562470	14.75	2	1	Kilifi	Kenya	Africa	0	0	0	0	0	0	0	1	1	0	1	0	0	0	0	0	0	0	0	13.15	-0.86	0.386301	1	0	0	0	0	0	0	0	0	MS8	2023-01-31	146534	B	MS8NEG	2.0	0	0	0	137.1	4.97	2.58
ERS15562472	19.97	1	1	Kilifi	Kenya	Africa	0	0	0	0	0	0	0	1	1	0	0	1	0	0	0	0	0	0	0	13.45	-1.63	0.391781	1	0	0	0	0	0	0	0	0	MS8	2023-01-31	146534	B	MS8NEG	2.0	0	0	0
ERS15562454	10.41	2	1	Mbagathi	Kenya	Africa	0	0	0	0	0	0	0	1	1	1	1	1	1	1	0	1	1	1	0	14.25	0.04	0.553425	0	0	0	0	0	0	0	1	0	MS3	2023-01-23	146534	A	MS3NEG	1.0	3	0	0
ERS15562473	9.17	1	1	Kilifi	Kenya	Africa	0	0	0	0	0	0	0	0	1	0	1	1	0	0	0	0	0	0	0	13.45	-0.09	0.408219	0	1	0	0	0	0	0	0	0	MS8	2023-01-31	146534	B	MS8NEG	2.0	0	0	0	136	3.77	2.47
ERS15562576	10.94	2	1	Kilifi	Kenya	Africa	0	0	0	0	0	0	0	1	1	0	0	1	0	0	0	0	0	0	0	14.4	-0.25	0.432877	1	0	0	0	0	0	0	0	0	MS8	2023-01-31	146534	B	MS8NEG	2.0	0	0	0	140	4.6	2.39
ERS15562444	12.84	2	1	Mbagathi	Kenya	Africa	0	1	1	0	0	0	1	1	1	1	1	1	1	0	1	0	1	1	0	14.95	0.85	0.446575	0	1	0	0	0	0	0	0	0	MS3	2023-01-23	146534	A	MS3NEG	1.0	0	0	0
ERS15562455	22.63	2	0	Mbagathi	Kenya	Africa	0	0	0	0	0	0	0	1	1	1	1	1	1	1	1	1	1	1	0	15.95	1.53	0.561644	0	0	0	0	0	0	0	1	2	MS3	2023-01-23	146534	A	MS3NEG	1.0	0	0	0			2.48
ERS15562577	11.93	2	1	Kilifi	Kenya	Africa	0	0	0	0	0	0	0	0	1	0	0	0	0	0	0	0	1	1	0	13.65	-0.71	0.463014	1	0	0	0	0	0	0	0	0	MS8	2023-01-31	146534	B	MS8NEG	2.0	0	0	0	133	4	2.3
ERS15562456	13.99	2	1	Mbagathi	Kenya	Africa	0	0	0	0	0	0	0	1	1	1	1	1	1	1	1	1	1	1	0	13.45	-0.61	0.569863	1	0	0	0	0	0	0	0	0	MS3	2023-01-23	146534	A	MS3NEG	1.0	0	0	0
ERS15562578	20.14	2	1	Kilifi	Kenya	Africa	0	0	0	0	0	0	0	0	1	0	1	1	0	0	0	0	1	1	0	14.2	-0.02	0.463014	1	0	0	0	0	0	0	0	0	MS8	2023-01-31	146534	B	MS8NEG	2.0	0	0	0	135	4	2.06
ERS15562457	10.58	2	1	Mbagathi	Kenya	Africa	0	0	0	0	0	0	0	0	0	0	0	0	0	0	0	0	0	0	0	14.45	1.06	0.679452	1	0	0	0	0	0	0	0	0	MS3	2023-01-23	146534	A	MS3NEG	1.0	0	0	0
ERS15562579	8.28	1	1	Kilifi	Kenya	Africa	0	0	0	0	0	0	0	0	1	0	0	0	0	0	0	0	0	0	0	13.95	-0.93	0.463014	0	0	0	0	0	0	1	0	0	MS8	2023-01-31	146534	B	MS8NEG	2.0	0	0	0	134	4.1	2.18
ERS15562459	14.78	1	1	Mbagathi	Kenya	Africa	0	0	0	0	0	0	0	1	1	1	1	1	1	1	0	1	1	1	0	14.95	-0.4	0.679452	1	0	0	0	0	0	0	0	0	MS3	2023-01-23	146534	A	MS3NEG	1.0	0	0	0
ERS15562580	12.39	1	1	Kilifi	Kenya	Africa	0	0	0	0	0	0	0	0	1	0	1	0	0	0	0	0	0	0	0	12.6	-1.8	0.468493	1	0	0	0	0	0	0	0	0	MS8	2023-01-31	146534	B	MS8NEG	2.0	0	0	0	135	4	2.43
ERS15562478	16.29	1	1	Mbagathi	Kenya	Africa	0	0	0	0	0	0	0	0	1	1	1	1	1	1	1	1	1	1	0	15.65	0.83	0.682192	1	0	0	0	0	0	0	0	0	MS3	2023-01-23	146534	A	MS3NEG	1.0	0	0	0
ERS15562479	16.79	2	1	Mbagathi	Kenya	Africa	0	0	0	0	0	0	0	1	1	1	1	1	1	1	1	1	1	1	0	15.15	1.29	0.717808	1	0	0	0	0	0	0	0	0	MS3	2023-01-23	146534	A	MS3NEG	1.0	0	0	0
ERS15562448	12.61	2	1	Mbagathi	Kenya	Africa	0	0	0	0	0	0	0	1	1	1	1	1	1	0	1	1	1	1	0	13.2	-0.73	0.473973	0	1	0	0	0	0	0	0	0	MS3	2023-01-23	146534	A	MS3NEG	1.0	0	0	0
ERS15562582	15.8	1	0	Kilifi	Kenya	Africa	0	0	0	0	0	0	0	1	1	0	1	1	0	0	0	0	0	1	0	13.85	-1.14	0.468493	0	0	0	0	0	0	0	1	0	MS8	2023-01-31	146534	B	MS8NEG	2.0	0	0	0	135	3.7	2.43
ERS15562581	14.78	1	1	Kilifi	Kenya	Africa	0	0	0	0	0	0	0	0	1	0	1	0	0	0	0	0	0	1	0	15.35	0.34	0.468493	1	0	0	0	0	0	0	0	0	MS8	2023-01-31	146534	B	MS8NEG	2.0	0	0	0	139	4.3	2.36
ERS15562480	9.76	1	1	Karachi	Pakistan	Asia	0	0	0	0	0	0	0	1	1	1	1	1	1	1	1	1	1	1	0	12.65	-0.79	0.00547945	1	0	0	0	0	0	0	0	0	MS3	2023-01-23	146534	A	MS3NEG	1.0	0	0	0	144	4.9	3.46387
ERS15562481	11.6	2	0	Karachi	Pakistan	Asia	0	0	0	0	0	0	0	1	1	0	1	1	0	0	1	1	0	1	0	12.05	-1.95	0.482192	0	0	0	0	0	0	0	1	0	MS4	2023-01-25	146534	A	MS4NEG	1.0	0	0	0	142	3.1	3.32103
ERS15562583	9.1	1	1	Kilifi	Kenya	Africa	0	0	0	0	0	0	0	0	1	0	0	0	0	0	0	0	0	0	0	12.25	-1.76	0.468493	0	0	0	0	0	0	0	1	0	MS9	2023-02-02	146534	B	MS9NEG	2.0	0	0	0	135	4.3	2.59
ERS15562585	22.83	2	0	Kilifi	Kenya	Africa	0	0	0	0	0	0	0	0	1	1	1	1	0	1	1	1	1	1	0	13.7	0.35	0.482192	1	0	0	0	0	0	0	0	0	MS9	2023-02-02	146534	B	MS9NEG	2.0	0	0	0	135	3.9	2.24
ERS15562482	11.66	2	0	Karachi	Pakistan	Asia	0	0	0	0	0	0	0	1	1	0	0	0	0	0	0	0	0	1	1	14.55	0.5	0.361644	1	0	0	0	0	0	0	0	0	MS4	2023-01-25	146534	A	MS4NEG	1.0	0	0	1	138	6.6	3.571
ERS15562483	16.56	2	1	Karachi	Pakistan	Asia	0	0	1	0	0	0	0	1	1	1	0	0	0	0	0	0	0	0	0	12.95	0.14	0.131507	0	0	0	0	0	0	0	1	0	MS4	2023-01-25	146534	A	MS4NEG	1.0	0	0	0	140	4.8	3.53529
ERS15562584	10.87	1	1	Kilifi	Kenya	Africa	0	0	0	0	0	0	0	0	1	0	1	0	1	0	0	0	0	1	0	14.35	-0.19	0.827397	1	0	0	0	0	0	0	0	2	MS9	2023-02-02	146534	B	MS9NEG	2.0	0	0	0	134	3.5	2.2
ERS15562586	20.04	1	1	Mbagathi	Kenya	Africa	0	0	0	0	0	0	0	1	0	1	1	1	1	1	1	1	1	1	0	15.15	1.43	0.679452	1	0	0	0	0	0	0	0	0	MS9	2023-02-02	146534	B	MS9NEG	29.0	0	0	0	138	4.1	2.38
ERS15562476	6.93	1	1	Kilifi	Kenya	Africa	0	0	0	0	0	0	0	0	1	0	0	0	0	0	0	0	0	0	0	12.25	-1.9	0.408219	1	0	0	0	0	0	0	0	0	MS8	2023-01-31	146534	B	MS8NEG	2.0	0	0	0	135.9	4.48	2.44
ERS15562484	21.58	1	0	Karachi	Pakistan	Asia	1	0	0	0	0	0	0	1	1	1	1	1	0	1	1	1	1	1	1	11.95	-2.32	0.4	1	0	0	0	0	0	0	0	0	MS4	2023-01-25	146534	A	MS4NEG	1.0	0	0	1	143	4.4	3.571
ERS15562485	22.08	2	1	Karachi	Pakistan	Asia	0	0	0	0	0	0	0	0	1	0	1	1	0	0	0	1	0	1	0	13.95	-0.43	0.0109589	0	0	0	0	0	0	0	1	0	MS4	2023-01-25	146534	A	MS4NEG	1.0	0	0	0	143	4.3	3.49958
ERS15562587	11.6	1	1	Mbagathi	Kenya	Africa	0	0	0	0	0	0	0	1	1	1	1	1	1	1	1	1	0	0	0	15	0.37	0.682192	0	0	0	0	0	0	0	1	0	MS9	2023-02-02	146534	B	MS9NEG	29.0	0	0	0	137	4.7	2.6
ERS15562588	18.13	1	1	Mbagathi	Kenya	Africa	0	0	0	0	0	0	0	1	1	1	1	1	1	1	1	1	1	1	0	15.05	0.03	0.69863	0	1	0	0	0	0	0	0	0	MS9	2023-02-02	146534	B	MS9NEG	29.0	0	0	1	136	4.2	2.54
ERS15562486	16.49	2	1	Karachi	Pakistan	Asia	1	0	0	0	0	0	0	0	0	0	1	1	0	1	0	0	0	0	0	13.05	-1.43	0.446575	0	1	0	0	0	0	0	1	0	MS4	2023-01-25	146534	A	MS4NEG	1.0	0	0	0	143	4.1	3.60671
ERS15562487	13.67	1	1	Karachi	Pakistan	Asia	1	0	0	0	0	0	0	1	0	0	1	0	0	0	0	1	0	0	0	11.95	-1.81	0.99726	0	0	0	0	0	0	0	1	0	MS4	2023-01-25	146534	A	MS4NEG	1.0	0	0	1	139	3.1	3.28532
ERS15562590	7.39	1	1	Mbagathi	Kenya	Africa	0	0	0	0	0	0	0	1	0	1	1	1	1	0	0	1	1	1	0	13.25	0.01	0.739726	1	0	0	0	0	0	0	0	0	MS9	2023-02-02	146534	B	MS9NEG	29.0	0	0	0	135	4.4	2.4
ERS15562591	12.65	2	1	Mbagathi	Kenya	Africa	0	0	0	0	0	0	0	0	1	1	1	1	1	1	1	1	1	1	0	12.05	-1.92	0.739726	0	1	0	0	0	0	0	0	0	MS9	2023-02-02	146534	B	MS9NEG	29.0	0	0	0	137	4.6	2.48
ERS15562489	19.22	2	0	Karachi	Pakistan	Asia	1	0	0	0	0	0	0	1	1	0	1	0	0	1	0	0	1	1	1	14.2	1.07	0.545205	1	0	0	0	0	0	0	0	0	MS4	2023-01-25	146534	A	MS4NEG	1.0	0	0	1	142	5.1	3.74955
ERS15562491	13.96	1	1	Karachi	Pakistan	Asia	1	0	0	0	0	0	0	1	0	0	1	0	0	0	0	0	0	0	0	14.5	0.18	0.99726	1	0	0	0	0	0	0	0	0	MS4	2023-01-25	146534	A	MS4NEG	1.0	0	0	0	141	5	3.71384
ERS15562569	23.92	2	0	Kilifi	Kenya	Africa	0	0	0	0	0	0	0	1	1	0	1	1	0	0	0	0	1	1	0	12.4	-0.91	0.413699	1	0	0	0	0	0	0	0	0	MS8	2023-01-31	146534	B	MS8NEG	2.0	0	0	0	138	4.4	2.14
ERS15562592	10.22	1	1	Mbagathi	Kenya	Africa	0	0	0	0	0	0	0	1	1	1	1	1	1	0	0	0	1	1	0	14.85	-0.24	0.493088	0	0	0	0	0	0	0	1	0	MS9	2023-02-02	146534	B	MS9NEG	29.0	0	0	0
ERS15562593	9.53	2	1	Mbagathi	Kenya	Africa	0	0	0	0	0	0	0	1	1	1	1	1	1	1	0	1	1	1	1	14.15	0.55	0.758904	1	0	0	0	0	0	0	0	0	MS9	2023-02-02	146534	B	MS9NEG	29.0	0	0	0	136	4.9	2.68
ERS15562492	2.76	1	1	Karachi	Pakistan	Asia	0	0	0	0	0	0	0	1	0	0	0	0	0	0	0	0	0	0	0	9.55	-0.5	0.123288	1	0	0	0	0	0	0	0	0	MS4	2023-01-25	146534	A	MS4NEG	1.0	0	0	0	143	5.9	3.60671
ERS15562594	13.53	1	1	Mbagathi	Kenya	Africa	0	0	0	0	0	0	0	1	1	1	0	1	1	1	0	0	1	1	0	14.65	0.02	0.775342	0	1	0	0	0	0	0	0	0	MS9	2023-02-02	146534	B	MS9NEG	29.0	0	0	0	138	5.3	2.5
ERS15562493	15.05	1	1	Karachi	Pakistan	Asia	1	0	0	0	0	0	0	1	0	0	0	1	1	0	0	0	1	1	0	14.15	0.06	0.0712329	1	0	0	0	0	0	0	0	0	MS4	2023-01-25	146534	A	MS4NEG	1.0	0	0	0	142	4.6	3.71384
ERS15562595	19.91	2	1	Mbagathi	Kenya	Africa	0	0	0	0	0	0	0	1	1	1	1	1	1	1	1	1	1	1	0	13.45	-0.58	0.789041	1	0	0	0	0	0	0	0	2	MS9	2023-02-02	146534	B	MS9NEG	29.0	0	0	0	139	4.3	2.36
ERS15562495	6.5	2	0	Karachi	Pakistan	Asia	0	0	0	0	0	0	0	1	1	0	1	1	0	0	0	1	1	1	1	11.5	-0.74	0.0219178	1	0	0	0	0	0	0	0	0	MS4	2023-01-25	146534	A	MS4NEG	1.0	0	0	0	140	4.5	3.67813
ERS15562596	15.37	2	1	Mbagathi	Kenya	Africa	0	0	0	0	0	0	0	1	1	1	1	1	1	1	0	0	1	1	0	15	0.4	0.794521	1	0	0	0	0	0	0	0	0	MS9	2023-02-02	146534	B	MS9NEG	29.0	0	0	0	137	4.2	2.41
ERS15562497	16.16	1	0	Karachi	Pakistan	Asia	0	0	0	0	0	0	0	1	0	0	1	0	0	0	0	0	0	1	0	14.95	0.53	0.0821918	0	0	0	0	0	0	1	0	0	MS4	2023-01-25	146534	A	MS4NEG	1.0	0	0	1	139	4.9	3.53529
ERS15562496	12.88	2	1	Karachi	Pakistan	Asia	1	0	0	0	0	0	0	0	1	1	1	1	1	0	1	1	1	1	1	13.95	-0.54	0.0246575	0	0	0	0	0	0	0	1	0	MS4	2023-01-25	146534	A	MS4NEG	1.0	0	0	0	142	4.4	3.53529
ERS15562446	22.7	1	0	Mbagathi	Kenya	Africa	0	0	0	0	0	0	0	1	1	1	1	1	1	1	1	1	1	1	0	13.05	-1.21	0.49589	0	1	0	0	0	0	0	0	0	MS3	2023-01-23	146534	A	MS3NEG	1.0	0	0	0
ERS15562597	17.67	2	1	Mbagathi	Kenya	Africa	0	0	0	0	0	0	0	1	1	1	1	1	1	1	1	1	1	1	0	16.05	1.46	0.8	1	0	0	0	0	0	0	0	0	MS9	2023-02-02	146534	B	MS9NEG	29.0	0	0	0	138	4.6	2.46
ERS15562599	16.62	1	1	Mbagathi	Kenya	Africa	0	0	0	0	0	0	0	1	1	1	1	1	1	1	0	1	1	1	0	16.15	1.25	0.819178	1	0	0	0	0	0	0	0	0	MS9	2023-02-02	146534	B	MS9NEG	29.0	0	0	0
ERS15562498	22.8	2	0	Karachi	Pakistan	Asia	1	0	0	0	0	0	0	0	1	1	1	0	1	1	0	1	1	1	1	12.95	-0.68	0.120548	1	0	0	0	0	0	0	0	0	MS4	2023-01-25	146534	A	MS4NEG	1.0	0	0	0	146	4.4	3.53529
ERS15562499	15.74	1	0	Karachi	Pakistan	Asia	0	0	0	0	0	0	0	1	1	1	1	1	1	1	0	1	1	1	1	14.45	-0.16	0.920548	0	1	0	0	0	0	0	0	0	MS4	2023-01-25	146534	A	MS4NEG	1.0	0	0	0	141	4.7	3.35674
ERS15562598	21.71	2	0	Mbagathi	Kenya	Africa	0	0	0	0	0	0	0	1	1	1	1	1	1	1	1	1	1	1	1	13.55	0.6	0.854795	1	0	0	0	0	0	0	0	0	MS9	2023-02-02	146534	B	MS9NEG	29.0	0	0	0	137	4.2	2.46
ERS15562600	21.45	1	0	Mbagathi	Kenya	Africa	0	0	0	0	0	0	0	1	1	1	1	1	1	1	0	1	1	1	1	12.85	-1.41	0.493088	1	0	0	0	0	0	0	0	2	MS9	2023-02-02	146534	B	MS9NEG	29.0	0	0	0
ERS15562500	21.81	1	0	Karachi	Pakistan	Asia	0	0	0	0	0	0	0	1	0	0	0	1	0	0	0	1	0	0	0	14.65	-0.2	0.10411	0	1	0	0	0	0	0	0	0	MS4	2023-01-25	146534	A	MS4NEG	1.0	0	0	0	142	4.1	3.49958
ERS15562502	14.95	1	1	Karachi	Pakistan	Asia	0	0	0	0	0	0	0	1	0	0	1	1	0	0	0	1	0	0	0	14.65	-0.91	0.106849	0	0	0	0	0	0	1	0	0	MS4	2023-01-25	146534	A	MS4NEG	1.0	0	0	0	142	3.4	3.42816
ERS15562601	11.86	2	1	Mbagathi	Kenya	Africa	0	0	0	1	0	0	0	1	1	1	0	1	1	0	0	0	1	1	0	14.75	0.4	0.0410959	0	0	0	0	0	0	0	1	0	MS9	2023-02-02	146534	B	MS9NEG	29.0	0	0	1	138	4.1	2.31
ERS15562602	17.77	1	0	Mbagathi	Kenya	Africa	0	0	0	0	0	0	0	1	1	1	1	1	1	1	1	0	1	1	0	14.55	0.28	0.0794521	1	0	0	0	0	0	0	0	0	MS9	2023-02-02	146534	B	MS9NEG	29.0	0	0	0	138	4.2	2.22
ERS15562447	8.21	1	1	Mbagathi	Kenya	Africa	0	0	0	0	0	0	0	1	1	1	1	1	1	0	1	0	0	0	0	13.65	0.23	0.49589	0	1	0	0	0	0	0	0	0	MS3	2023-01-23	146534	A	MS3NEG	1.0	0	0	0
ERS15562501	14.26	1	1	Karachi	Pakistan	Asia	0	0	0	0	1	0	0	0	1	1	1	1	1	1	1	1	1	1	1	12.05	-2.82	0.131507	1	0	0	0	0	0	0	0	0	MS4	2023-01-25	146534	A	MS4NEG	1.0	0	0	0	140	5.4	3.67813
ERS15562503	13.47	2	1	Karachi	Pakistan	Asia	1	0	0	0	0	0	0	1	1	1	1	1	1	1	1	1	1	1	1	12.95	-1.65	0.147945	1	0	0	0	0	0	0	0	0	MS4	2023-01-25	146534	A	MS4NEG	1.0	0	0	0	147	5.3	3.74955
ERS15562603	17.44	2	0	Mbagathi	Kenya	Africa	0	0	0	0	0	0	0	1	1	1	1	1	1	1	1	1	1	1	0	14.35	0.96	0.0876712	1	0	0	0	0	0	0	0	0	MS9	2023-02-02	146534	B	MS9NEG	29.0	0	0	0	145	4.3	2.23
ERS15562604	23.78	1	1	Mbagathi	Kenya	Africa	0	0	0	0	0	0	0	1	1	1	1	1	1	1	1	0	1	1	0	16.05	0.72	0.0958904	0	0	0	0	0	0	0	1	0	MS9	2023-02-02	146534	B	MS9NEG	29.0	3	0	0	137	4.5	2.42
ERS15562505	18.07	2	1	Karachi	Pakistan	Asia	1	0	0	0	0	0	0	0	1	1	1	1	1	1	1	1	1	1	1	12.5	-2.25	0.175342	1	0	0	0	0	0	0	0	0	MS4	2023-01-25	146534	A	MS4NEG	1.0	0	0	0	140	5.4	3.28532
ERS15562504	15.47	1	1	Karachi	Pakistan	Asia	0	0	0	0	0	0	0	0	1	1	1	0	0	1	0	1	0	1	0	15.55	0.66	0.178082	1	0	0	0	0	0	0	0	0	MS5	2023-01-26	146534	A	MS5NEG	1.0	0	0	0	142	4.4	3.46387
ERS15562605	7.52	1	1	Mbagathi	Kenya	Africa	0	0	0	0	0	0	0	1	1	0	0	1	0	0	0	0	1	0	0	12.6	-1.14	0.493088	0	1	0	0	0	0	0	0	0	MS9	2023-02-02	146534	B	MS9NEG	29.0	0	0	0
ERS15562606	22.31	2	0	Mbagathi	Kenya	Africa	0	0	0	0	0	0	0	1	1	1	1	1	1	1	0	1	1	1	0	14.05	-0.23	0.106849	1	0	0	0	0	0	0	0	0	MS9	2023-02-02	146534	B	MS9NEG	29.0	0	0	0	138	4.2	2.41
ERS15562507	15.9	2	1	Karachi	Pakistan	Asia	0	0	0	0	0	0	0	1	0	0	0	1	0	0	0	1	0	0	0	13.35	-1.53	0.19726	1	0	0	0	0	0	0	0	0	MS5	2023-01-26	146534	A	MS5NEG	1.0	0	0	0	141	4.4	3.571
ERS15562506	16.66	2	1	Karachi	Pakistan	Asia	0	0	1	0	0	0	0	0	0	1	0	1	1	0	0	0	1	1	1	13.5	-3.95	0.208219	0	0	0	0	0	0	0	1	0	MS5	2023-01-26	146534	A	MS5NEG	1.0	0	0	0	142	4.8	3.42816
ERS15562571	10.84	2	1	Kilifi	Kenya	Africa	0	0	0	0	0	0	0	0	1	0	1	0	0	0	0	0	1	1	0	13.4	-0.91	0.413699	1	0	0	0	0	0	0	0	0	MS8	2023-01-31	146534	B	MS8NEG	2.0	0	0	0	142	4.4	2.33
ERS15562607	10.38	1	1	Mbagathi	Kenya	Africa	0	0	0	0	0	0	0	1	0	1	1	1	1	0	0	0	1	0	0	15.05	0.39	0.106849	1	0	0	0	0	0	0	0	0	MS10	2023-02-03	146534	B	MS10NEG	29.0	0	0	0	136	4.4	2.52
ERS15562608	7.75	1	1	Mbagathi	Kenya	Africa	0	0	0	0	0	0	0	1	1	0	0	0	0	0	0	0	0	1	0	14.55	0.71	0.493088	1	0	0	0	0	0	0	0	0	MS10	2023-02-03	146534	B	MS10NEG	29.0	0	0	0
ERS15562508	13.57	2	1	Karachi	Pakistan	Asia	1	0	0	0	0	0	0	1	0	0	0	0	0	0	0	0	0	0	0	12.8	-1.06	0.257534	1	0	0	0	0	0	0	0	0	MS5	2023-01-26	146534	A	MS5NEG	1.0	0	0	1	140	5.4	3.49958
ERS15562609	19.68	2	1	Mbagathi	Kenya	Africa	0	0	0	0	0	0	0	1	1	1	0	1	1	1	1	1	1	1	0	14.85	-0.09	0.126027	0	1	0	0	0	0	1	0	0	MS10	2023-02-03	146534	B	MS10NEG	29.0	0	0	1	135	4.1	2.25
ERS15562510	22.37	1	1	Karachi	Pakistan	Asia	0	0	0	0	0	0	0	1	1	0	1	1	1	0	0	1	0	1	1	13.25	-1.11	0.273973	1	0	0	0	0	0	0	0	0	MS5	2023-01-26	146534	A	MS5NEG	2.0	0	0	0	142	4.2	3.39245
ERS15562611	10.25	2	1	Mbagathi	Kenya	Africa	0	0	0	0	0	0	0	1	1	1	1	1	1	1	1	1	1	1	1	16.55	2.69	0.136986	0	0	0	0	0	0	0	1	2	MS10	2023-02-03	146534	B	MS10NEG	29.0	0	0	0	137	4.7	2.36
ERS15562509	17.12	2	1	Karachi	Pakistan	Asia	1	0	0	0	0	0	0	1	1	0	0	1	1	0	0	1	1	0	1	13.45	-0.6	0.290411	0	0	0	0	0	0	0	1	0	MS5	2023-01-26	146534	A	MS5NEG	2.0	0	0	1	143	3.7	3.2139
ERS15562610	8.15	2	1	Mbagathi	Kenya	Africa	0	0	0	0	0	0	0	1	1	1	1	1	1	0	1	1	0	1	0	13.05	-0.73	0.136986	0	0	0	0	0	0	0	1	0	MS10	2023-02-03	146534	B	MS10NEG	29.0	0	0	0	137	4.5	2.33
ERS15562511	16.66	1	0	Karachi	Pakistan	Asia	0	0	0	0	0	0	0	1	0	0	0	1	1	0	0	0	0	0	0	14.55	-0.86	0.361644	1	0	0	0	0	0	0	0	1	MS5	2023-01-26	146534	A	MS5NEG	2.0	0	0	0	148	5.3	2.67825
ERS15562612	6.96	2	1	Mbagathi	Kenya	Africa	0	0	0	0	0	0	0	0	1	1	1	1	0	1	1	0	0	1	0	12.85	-1.1	0.142466	0	1	0	0	0	0	0	0	0	MS10	2023-02-03	146534	B	MS10NEG	29.0	0	0	0	137	4.6	2.52
ERS15562570	14.55	1	1	Kilifi	Kenya	Africa	0	0	0	0	0	0	0	0	1	0	1	1	0	0	0	0	1	1	0	13.2	-1.26	0.413699	1	0	0	0	0	0	0	0	0	MS8	2023-01-31	146534	B	MS8NEG	2.0	0	0	0	138	4.7	2.16
ERS15562513	22.4	2	0	Karachi	Pakistan	Asia	0	0	0	0	0	0	0	0	1	1	1	1	1	0	1	1	1	1	1	15.25	-0.94	0.484932	1	0	0	0	0	0	0	0	0	MS5	2023-01-26	146534	A	MS5NEG	2.0	0	0	1	137	4.3	3.32103
ERS15562613	14.82	1	1	Mbagathi	Kenya	Africa	0	0	0	0	0	0	0	1	1	1	1	1	1	1	1	1	1	1	0	15.55	0.66	0.145205	0	1	0	0	0	0	0	1	2	MS10	2023-02-03	146534	B	MS10NEG	29.0	0	0	0	135	4.6	2.32
ERS15562515	13.17	2	1	Karachi	Pakistan	Asia	0	0	0	0	0	0	0	0	0	0	0	1	0	0	0	0	0	0	0	11.85	-2.19	0.490411	0	1	0	0	0	0	0	0	0	MS5	2023-01-26	146534	A	MS5NEG	2.0	0	0	0	137	5.9	3.60671
ERS15562516	8.84	1	1	Karachi	Pakistan	Asia	0	0	1	0	0	0	0	1	0	0	0	1	0	0	0	1	0	0	0	13.05	-2.29	0.506849	0	0	0	0	0	0	0	1	1	MS5	2023-01-26	146534	A	MS5NEG	2.0	0	0	1	138	4.6	3.53529
ERS15562614	11.6	1	1	Mbagathi	Kenya	Africa	0	0	0	0	0	0	0	0	1	1	1	1	1	1	0	1	1	1	0	14.15	-0.33	0.145205	0	1	0	0	0	0	0	0	0	MS10	2023-02-03	146534	B	MS10NEG	29.0	0	0	0	134	4.3	2.17
ERS15562615	16.72	2	1	Mbagathi	Kenya	Africa	0	0	0	0	0	0	0	1	0	1	1	1	1	1	0	1	1	1	0	15	0.13	0.493088	1	0	0	0	0	0	0	0	0	MS10	2023-02-03	146534	B	MS10NEG	29.0	0	0	0
ERS15562517	23.95	2	0	Karachi	Pakistan	Asia	1	0	0	0	0	0	0	1	0	0	1	1	0	0	0	1	0	0	0	12.35	-1.34	0.660274	0	0	0	0	0	0	1	0	0	MS5	2023-01-26	146534	A	MS5NEG	2.0	0	0	1	137	5	3.35674
ERS15562519	3.38	2	0	Karachi	Pakistan	Asia	0	0	0	0	1	0	0	1	1	0	0	0	0	0	0	0	0	0	0	8.2	-4.2	0.70411	1	0	0	0	0	0	0	0	0	MS5	2023-01-26	146534	A	MS5NEG	2.0	0	0	0	141	4.7	3.32103
ERS15562616	18.5	1	1	Mbagathi	Kenya	Africa	0	0	0	0	0	0	0	1	1	1	1	1	1	1	1	1	1	1	1	14.45	0.13	0.175342	0	1	0	0	0	0	0	1	0	MS10	2023-02-03	146534	B	MS10NEG	29.0	0	0	0	139	4.4	2.33
ERS15562617	17.58	1	1	Mbagathi	Kenya	Africa	0	0	0	0	0	0	0	1	1	1	1	1	1	1	1	0	1	1	0	16.05	1.12	0.19726	0	0	0	0	0	0	0	1	0	MS10	2023-02-03	146534	B	MS10NEG	29.0	0	0	0	137	4.4	2.22
ERS15562655	6.47	1	0	Kampala	Uganda	Africa	0	0	0	0	0	0	0	1	1	1	0	0	0	0	0	0	1	0	0	12.65	-0.18	0.720548	0	0	0	0	0	0	1	0	0	MS12	2023-02-14	146534	D	MS12NEG	34.0	0	0	0	135	4.4	2.61
ERS15562660	22.54	1	0	Kampala	Uganda	Africa	0	0	0	0	0	0	0	1	1	0	0	1	1	1	0	1	0	0	0	14	0.5	0.679452	1	0	0	0	0	0	0	0	0	MS12	2023-02-14	146534	D	MS12NEG	34.0	0	0	1	133	5.3	2.56
ERS15562659	2.63	2	1	Kampala	Uganda	Africa	0	0	0	0	0	0	0	0	0	0	0	0	0	0	0	0	0	0	0	13.5	1.62	0.679452	0	0	0	0	0	0	1	0	0	MS12	2023-02-14	146534	D	MS12NEG	34.0	0	0	0	131	5.8	2.71
ERS15562661	6.57	1	1	Kampala	Uganda	Africa	0	0	0	0	0	0	0	1	1	1	0	0	0	1	0	1	0	0	0	14	1.16	0.679452	0	0	0	0	0	0	1	0	0	MS12	2023-02-14	146534	D	MS12NEG	34.0	3	0	0	132	5.2	2.31
ERS15562662	11.04	2	1	Kampala	Uganda	Africa	0	0	0	0	0	0	0	1	1	0	0	0	1	0	0	0	0	1	0	14	-0.5	0.643836	1	0	0	0	0	0	0	0	0	MS12	2023-02-14	146534	D	MS12NEG	34.0	0	0	0	136	4.6	2.6
ERS15562663	14.72	1	1	Kampala	Uganda	Africa	0	0	0	0	0	0	0	0	1	1	0	0	1	0	0	0	0	0	0	13.95	-0.23	0.586301	0	0	0	0	0	0	1	0	1	MS12	2023-02-14	146534	D	MS12NEG	34.0	0	0	0	134	4.33	2.54
ERS15562664	17.54	1	0	Kampala	Uganda	Africa	0	0	0	0	0	0	0	1	1	1	1	0	1	1	1	0	0	0	0	14.8	0.65	0.60274	0	0	0	0	0	0	1	0	0	MS12	2023-02-14	146534	D	MS12NEG	36.0	3	0	1	136	4.9	2.54
ERS15562665	10.74	1	0	Kampala	Uganda	Africa	0	0	0	0	0	0	0	0	1	0	0	0	1	0	0	0	1	0	0	14	-0.87	0.564384	0	0	0	0	0	0	1	0	0	MS12	2023-02-14	146534	D	MS12NEG	36.0	3	0	0	138	5.51	2.41
ERS15562668	13.11	2	1	Kampala	Uganda	Africa	0	0	0	0	0	0	0	0	1	1	1	0	1	1	1	0	0	0	0	13.5	1.12	0.526027	0	1	0	0	0	0	0	0	0	MS12	2023-02-14	146534	D	MS12NEG	36.0	0	0	0	138	4.73	2.46
ERS15562669	9.23	2	1	Kampala	Uganda	Africa	0	0	1	0	0	0	0	0	1	1	0	1	0	1	0	0	0	1	0	12.95	-1.26	0.509589	1	0	0	0	0	0	0	0	0	MS12	2023-02-14	146534	D	MS12NEG	36.0	0	0	0
ERS15562671	6.64	1	1	Kampala	Uganda	Africa	0	0	0	0	0	0	0	1	0	0	0	1	1	1	0	0	1	1	0	12.4	-0.42	0.408219	1	0	0	0	0	0	0	0	0	MS12	2023-02-14	146534	D	MS12NEG	36.0	0	0	0
ERS15562656	9.46	1	1	Kampala	Uganda	Africa	0	0	0	0	0	0	0	0	1	1	0	1	1	1	0	0	0	0	0	14.45	0.5	0.720548	0	0	0	0	0	0	1	0	0	MS12	2023-02-14	146534	D	MS12NEG	34.0	0	0	0	134	4.5	2.5
ERS15562672	5.81	1	1	Kampala	Uganda	Africa	0	0	0	0	0	0	0	1	1	0	1	0	1	1	1	1	0	1	0	11.85	0.06	0.405479	0	0	0	1	0	0	0	0	0	MS12	2023-02-14	146534	D	MS12NEG	36.0	0	0	0	134	5.3	2.45
ERS15562674	12.09	2	1	Kampala	Uganda	Africa	0	0	0	0	0	0	0	0	1	1	0	1	1	1	1	1	1	1	0	13.05	-0.49	0.391781	1	0	0	0	0	0	0	0	0	MS12	2023-02-14	146534	D	MS12NEG	36.0	0	0	0	136	4.7	2.55
ERS15562676	5.95	1	1	Kampala	Uganda	Africa	0	0	0	0	0	0	0	0	1	1	0	0	0	0	0	0	0	0	0	13	0.55	0.386301	0	0	0	0	0	0	1	0	0	MS12	2023-02-14	146534	D	MS12NEG	36.0	0	0	1	136	4.5	2.62
ERS15562675	8.38	1	1	Kampala	Uganda	Africa	0	0	0	0	0	0	0	0	0	1	0	1	1	1	1	1	1	1	0	12.3	-1.91	0.353425	0	0	0	0	0	0	0	1	0	MS12	2023-02-14	146534	D	MS12NEG	36.0	0	0	0	134	4.6	2.36
ERS15562677	13.9	2	1	Kampala	Uganda	Africa	0	1	0	0	0	0	0	0	1	1	0	0	1	0	1	0	0	0	0	13.55	0.18	0.317808	0	0	0	0	0	1	0	1	0	MS12	2023-02-14	146534	D	MS12NEG	36.0	0	0	0	131	5.1	2.63
ERS15562678	14.78	2	0	Kampala	Uganda	Africa	0	0	0	0	0	0	0	1	1	1	1	1	1	1	1	0	0	0	0	13.55	-0.5	0.315068	1	0	0	0	0	0	0	0	0	MS12	2023-02-14	146534	D	MS12NEG	36.0	4	0	0	144	4.5	2.69
ERS15562679	22.67	2	0	Kampala	Uganda	Africa	0	0	0	0	0	0	0	1	1	1	1	1	1	1	0	1	0	1	0	14	-0.44	0.312329	1	0	0	0	0	0	0	0	0	MS13	2023-02-16	146534	D	MS13NEG	36.0	0	0	0	135	4.9	2.31
ERS15562680	13.6	2	1	Kampala	Uganda	Africa	0	1	0	0	0	0	0	1	1	1	0	1	1	1	1	1	1	1	0	13.3	-1.2	0.29589	1	0	0	0	0	0	0	0	0	MS13	2023-02-16	146534	D	MS13NEG	36.0	0	0	0	127	4.8	2.54
ERS15562681	14.78	1	1	Kampala	Uganda	Africa	0	0	0	0	0	0	0	1	1	0	0	1	1	1	1	0	0	1	0	13.6	0.69	0.145205	0	0	1	0	0	0	0	0	0	MS13	2023-02-16	146534	D	MS13NEG	36.0	0	0	0	136	4.9	2.66
ERS15562683	14.16	2	0	Kampala	Uganda	Africa	0	0	0	0	0	0	0	1	1	1	0	0	1	1	1	1	0	0	0	15.05	0.64	0.931507	0	0	0	0	0	0	1	0	0	MS13	2023-02-16	146534	D	MS13NEG	38.0	2	0	0	139	5.2	2.59
ERS15562686	7.79	2	0	Kampala	Uganda	Africa	0	0	0	0	0	0	0	1	1	0	0	1	1	1	1	0	1	1	0	10.05	-3.13	0.208219	1	0	0	0	0	0	0	0	2	MS13	2023-02-16	146534	D	MS13NEG	38.0	0	0	0	135	5.2	2.41
ERS15562687	4.6	2	1	Kampala	Uganda	Africa	0	0	0	0	0	0	0	0	0	0	0	0	0	0	0	0	0	0	0	13.35	1.87	0.186301	0	0	0	0	0	0	0	1	0	MS13	2023-02-16	146534	D	MS13NEG	38.0	0	0	0	137	5.1	2.65
ERS15562688	13.73	2	1	Kampala	Uganda	Africa	0	0	0	0	0	0	0	1	1	1	1	1	1	1	0	0	0	1	0	14.3	0.45	0.169863	1	0	0	0	0	0	0	0	0	MS13	2023-02-16	146534	D	MS13NEG	38.0	0	0	0	134	4.8	2.42
ERS15562690	18.3	2	0	Kampala	Uganda	Africa	0	1	0	1	0	0	0	1	1	1	0	1	1	1	0	0	0	0	0	13.95	0.14	0.109589	1	0	0	0	0	0	0	0	0	MS13	2023-02-16	146534	D	MS13NEG	38.0	0	0	0	136	4.7	2.33
ERS15562657	23.55	2	0	Kampala	Uganda	Africa	0	0	0	0	0	0	0	1	1	1	1	0	1	1	1	0	0	0	0	15	0.42	0.715068	0	0	1	0	0	0	0	0	0	MS12	2023-02-14	146534	D	MS12NEG	34.0	3	0	0	138	4.9	2.26
ERS15562658	9.92	2	1	Kampala	Uganda	Africa	0	0	0	0	0	0	0	0	1	1	0	0	1	1	1	1	0	0	0	13.05	-0.39	0.679452	1	0	0	0	0	0	0	0	0	MS12	2023-02-14	146534	D	MS12NEG	34.0	0	0	0	133	4.8	2.7
[truncated: 19 more columns]
