# Supplementary material for: Ancestral trajectory of infant gut microbiome assembly in non-industrialised populations
Source: Research Square preprint supplement (doi:10.21203/rs.3.rs-6675732/v1), 2025-05-30
Supplement: Supplementary file 9 [file 8fa1b6025072e691c4cc90a7.xlsx]

## Sheet: Sheet1
Species	Slope	Pearson coefficient	p-value
s__Escherichia coli	0.0107935	0.00509072	0.901299
s__Bifidobacterium infantis	0.689789	0.367802	1.57383e-20
s__Bifidobacterium breve	0.614675	0.302678	4.29768e-14
s__Faecalibacterium longum	0.0199193	0.0105074	0.797962
s__Bifidobacterium bifidum	0.697666	0.317149	2.15608e-15
s__Streptococcus sp000187445	0.350841	0.186023	4.83498e-06
s__Streptococcus lactarius	0.577528	0.28428	1.52708e-12
s__Dorea_A longicatena_B	0.0475338	0.024598	0.548943
s__Streptococcus sp934229725	0.570219	0.31663	2.40727e-15
s__Copromonas sp900066535	0.232255	0.115445	0.00477403
s__Enterocloster sp900541315	0.101266	0.0492954	0.229496
s__Anaerostipes hadrus	-0.12669	-0.066676	0.103915
s__Ligilactobacillus ruminis	0.267667	0.123403	0.00254555
s__Agathobaculum butyriciproducens	0.0338521	0.0170713	0.677469
s__Dorea formicigenerans	0.0542442	0.0261441	0.524107
s__Senegalimassilia anaerobia	0.210284	0.0947653	0.0206749
s__Veillonella parvula_A	-0.0154945	-0.00727024	0.859415
s__Ruminococcus_B gnavus	0.0227073	0.0101767	0.804188
s__Gemmiger formicilis	0.020934	0.0103837	0.80029
s__Bacteroides fragilis	0.193466	0.0818818	0.0457005
s__Veillonella sp022737715	-0.295273	-0.156673	0.000122745
s__Veillonella sp934230905	0.359687	0.161897	7.17724e-05
s__Intestinibacter bartlettii	-0.178337	-0.0858595	0.0361204
s__Klebsiella pneumoniae	-0.344541	-0.153241	0.000173029
s__Flavonifractor plautii	0.0130894	0.00585898	0.886498
s__Bifidobacterium longum	-0.236439	-0.107376	0.00870388
s__Megamonas funiformis	0.123503	0.0551987	0.178377
s__Parabacteroides distasonis	0.0683913	0.0308685	0.451935
s__Bacteroides uniformis	-0.00305994	-0.00137496	0.973278
s__Veillonella sp900538355	-0.352422	-0.184537	5.76952e-06
s__Phocaeicola vulgatus	-0.19585	-0.0849511	0.038143
s__Blautia_A massiliensis	0.0768998	0.0370317	0.366807
s__Sutterella wadsworthensis	0.242401	0.108601	0.00796421
s__Veillonella sp018367495	0.398128	0.168503	3.55517e-05
s__Haemophilus_D parainfluenzae_K	-0.149835	-0.0734633	0.0731131
s__Prevotella copri_A	0.28582	0.126485	0.00197585
s__Bacteroides ovatus	-0.0301611	-0.0133871	0.744312
s__Eggerthella lenta	0.123852	0.0524189	0.201284
s__Thomasclavelia ramosa	0.0831408	0.0377054	0.358147
s__Bacteroides thetaiotaomicron	-0.248522	-0.107735	0.00848106
s__Blautia_A wexlerae	-0.465588	-0.217162	8.57949e-08
s__Fusicatenibacter saccharivorans	-0.319885	-0.165783	4.76334e-05
s__Streptococcus salivarius	-0.780969	-0.3875	8.63582e-23
s__Streptococcus lutetiensis	-0.193706	-0.0819838	0.0454306
s__Blautia_A obeum	-0.0928173	-0.0453276	0.269232
s__Bifidobacterium sp002742445	0.0416647	0.0204723	0.617923
s__Mediterraneibacter faecis	0.134025	0.0607226	0.138691
s__Anaerobutyricum hallii	-0.16123	-0.0766206	0.0615715
s__Veillonella atypica	-0.373073	-0.162185	6.96488e-05
s__Streptococcus infantarius	-0.332888	-0.147237	0.000310193
s__Agathobacter faecis	0.065545	0.0311667	0.447576
s__g__Veillonella__47660_4#28_clean_bin.18.orig_cleaned	-0.363048	-0.160829	8.02046e-05
s__Veillonella_A sp000431435	0.243548	0.114017	0.00532388
s__Enterococcus_A avium	0.225602	0.108416	0.00807215
s__Collinsella aerofaciens_H	0.118451	0.0510333	0.213471
s__Enterococcus_B faecium	0.0496061	0.0228163	0.578266
s__Roseburia inulinivorans	-0.380511	-0.192081	2.31808e-06
s__Clostridium sp900540255	-0.214425	-0.100041	0.0145525
s__Prevotella sp934191715	0.130258	0.059358	0.1478
s__Limosilactobacillus mucosae	0.22052	0.102994	0.0118757
s__Bacteroides xylanisolvens	0.066442	0.0288741	0.481699
s__Parolsenella uli_B	0.488831	0.221975	4.34602e-08
s__Agathobacter rectalis	-0.201342	-0.0966948	0.0182158
s__Collinsella sp900556495	0.340306	0.16013	8.62161e-05
s__Lachnospira eligens_A	-0.288401	-0.13961	0.00063102
s__Anaeroglobus micronuciformis	-0.0627259	-0.0280465	0.494355
s__Bifidobacterium kashiwanohense_A	0.417698	0.195562	1.50334e-06
s__Enterobacter roggenkampii	-0.129201	-0.0546828	0.182475
s__Faecalibacillus intestinalis	-0.205522	-0.104531	0.0106624
s__Bacteroides fragilis_A	-0.0807259	-0.0341662	0.405073
s__Weissella confusa	-0.0448179	-0.0196986	0.631269
s__Clostridium_Q fessum	-0.206172	-0.0999802	0.0146133
s__Klebsiella quasipneumoniae	-0.360372	-0.155799	0.000134056
s__Copromonas sp900066785	-0.258665	-0.120451	0.00322806
s__KLE1615 sp900066985	-0.225989	-0.110876	0.00673845
s__Anaerobutyricum soehngenii	-0.32577	-0.147199	0.000311312
s__Dialister sp022722495	0.0859105	0.0371975	0.364664
s__Lactobacillus paragasseri	0.276967	0.126438	0.00198352
s__KLE1615 sp934292725	-0.278663	-0.141257	0.000542909
s__Faecalibacterium duncaniae	-0.140059	-0.0669009	0.102751
s__Ruminococcus_E bromii_B	-0.110454	-0.0505709	0.217654
s__Campylobacter infans	0.0775212	0.0339271	0.40837
s__Coprococcus_A catus_A	-0.339272	-0.160151	8.60304e-05
s__Catenibacterium sp000437715	0.0385545	0.017556	0.668849
s__Blautia_A faecis	-0.489539	-0.232755	8.95144e-09
s__Leuconostoc lactis	-0.170091	-0.0755149	0.0654291
s__Bacteroides caccae	-0.270161	-0.114342	0.00519377
s__Blautia_A sp003471165	-0.178157	-0.0812982	0.0472714
s__Megasphaera sp000417505	0.271037	0.121893	0.00287632
s__Clostridium sp000435835	-0.387121	-0.179263	1.06813e-05
s__Paratractidigestivibacter faecalis	0.0614512	0.0270154	0.510368
s__Holdemanella biformis	-0.119461	-0.0538153	0.189523
s__Anaerotignum faecicola	-0.134729	-0.063442	0.121834
s__Acetatifactor sp003447295	-0.1409	-0.0678054	0.0981743
s__Odoribacter splanchnicus	-0.146666	-0.0658891	0.10807
s__Limosilactobacillus fermentum	0.117924	0.0548363	0.181248
s__Acetatifactor sp900066565	-0.0850163	-0.0402023	0.327186
s__Faecalibacterium sp900539885	-0.131245	-0.0617535	0.132101
s__Streptococcus pasteurianus	-0.222285	-0.0965061	0.0184446
s__Lachnospira sp000436475	-0.0317643	-0.0151523	0.712009
s__Campylobacter_D jejuni	0.151141	0.0674013	0.100199
s__Holdemanella sp900556915	-0.186063	-0.082982	0.0428581
s__CAG-217 sp000436335	-0.0257572	-0.0117166	0.7753
s__Coprococcus_A catus	-0.271102	-0.136166	0.000859806
s__Faecalibacterium prausnitzii_D	-0.335835	-0.16032	8.45408e-05
s__Bariatricus comes	-0.245083	-0.114474	0.00514194
s__Parabacteroides merdae	-0.0717358	-0.0309368	0.450934
s__Phocaeicola dorei	-0.112615	-0.0476628	0.245311
s__Bifidobacterium pseudocatenulatum	-0.473737	-0.218426	7.1864e-08
s__CAG-41 sp900066215	-0.286231	-0.131351	0.0013095
s__Acetatifactor intestinalis	0.083291	0.0398985	0.330858
s__Alistipes shahii	-0.138082	-0.0630809	0.123975
s__Roseburia hominis	0.0300933	0.0135425	0.741448
s__Lachnospira eligens	-0.178021	-0.0802064	0.0503319
s__Prevotella sp002265625	-0.151681	-0.0664952	0.104859
s__Faecalibacterium prausnitzii_E	-0.378123	-0.185751	4.99406e-06
s__Vescimonas coprocola	-0.156127	-0.0714347	0.0814195
s__Faecalibacterium sp900539945	-0.443855	-0.214027	1.32512e-07
s__Enterobacter hormaechei_A	-0.20543	-0.0915548	0.0254081
s__ER4 sp000765235	-0.257202	-0.121518	0.0029643
s__Enterobacter cloacae	-0.448693	-0.208513	2.80151e-07
s__Sarcina ventriculi	-0.489143	-0.220624	5.26846e-08
s__Gemmiger sp900539695	-0.388718	-0.185846	4.93776e-06
s__Fusobacterium_A mortiferum	-0.0693151	-0.0300692	0.463737
s__Ureaplasma sp900544585	0.057014	0.0241305	0.556567
s__Streptococcus thermophilus	0.09359	0.0407055	0.321162
s__g__Bifidobacterium__47660_4#128_clean_bin.22.orig_cleaned	-0.0084591	-0.00382759	0.925707
s__Veillonella sp900550455	-0.00131834	-0.000578473	0.988756
s__Duodenibacillus massiliensis	-0.0246375	-0.0106818	0.794681
s__Mediterraneibacter lactaris	-0.546656	-0.256929	1.93443e-10
s__Limisoma sp000437795	0.0007352	0.000323403	0.993714
s__Alistipes finegoldii	-0.124796	-0.0560799	0.171536
s__Evtepia sp004556345	-0.171677	-0.0797909	0.0515395
s__Akkermansia muciniphila	-0.104253	-0.0448131	0.27471
s__Dialister sp000434475	0.166178	0.0733107	0.0737126
s__Catenibacterium mitsuokai	0.00446228	0.00199152	0.961304
s__Streptococcus sp001556435	-0.518752	-0.231876	1.02117e-08
s__Alistipes putredinis	0.0217034	0.00942105	0.818465
s__Eubacterium_I ramulus	-0.311793	-0.136008	0.000871922
s__Oliverpabstia faecicola	-0.393375	-0.18285	7.03937e-06
s__Fimenecus sp000432435	-0.125353	-0.0548074	0.181479
s__Faecalimonas phoceensis	-0.273315	-0.115677	0.00468966
s__Oliverpabstia intestinalis	-0.466815	-0.209693	2.39088e-07
s__Bifidobacterium kashiwanohense	-0.0274898	-0.0139166	0.734571
s__g__Collinsella__47680_3#12_clean_bin.3.orig_cleaned	0.00654809	0.00277139	0.946171
s__Limosilactobacillus vaginalis	0.238284	0.107094	0.00888246
s__Blautia_A sp000436615	-0.411659	-0.195682	1.4809e-06
s__Limosilactobacillus oris	0.240861	0.107885	0.00838948
s__Enterococcus_B hirae	-0.179306	-0.075889	0.0641023
s__Enterocloster sp000431375	-0.284676	-0.126668	0.00194598
s__Streptococcus vestibularis	-0.30892	-0.130747	0.00137918
s__Sutterella wadsworthensis_A	-0.143622	-0.0622674	0.128908
s__Faecalibacillus faecis	0.0418455	0.0183387	0.655017
s__Vescimonas sp900552475	-0.264388	-0.120015	0.00334185
s__Ligilactobacillus salivarius	0.0718915	0.0315091	0.442599
s__Agathobaculum sp003481705	-0.243256	-0.113725	0.00544281
s__Limosilactobacillus gastricus	0.352214	0.160646	8.17387e-05
s__Succinivibrio sp000431835	-0.165147	-0.0739086	0.0713855
s__Lachnospira rogosae	-0.225136	-0.100096	0.0144989
s__Roseburia sp019411365	-0.0443295	-0.0198496	0.628655
s__Escherichia ruysiae	-0.014988	-0.00634348	0.877183
s__Faecalibacterium prausnitzii_A	-0.282066	-0.124693	0.00229096
s__Dorea_A longicatena	-0.247139	-0.107233	0.00879417
s__Hominisplanchenecus faecis	-0.504033	-0.234564	6.81292e-09
s__Bacteroides stercoris	0.045961	0.0205343	0.61686
s__Gemmiger qucibialis	-0.218278	-0.10399	0.0110763
s__Prevotella sp900290275	0.0245555	0.0107228	0.793911
s__Mediterraneibacter torques	-0.170936	-0.0723465	0.0775959
s__Lactococcus garvieae	0.152812	0.0646758	0.114733
s__Alloprevotella timonensis	0.0328032	0.0138835	0.735178
s__Phocaeicola plebeius_A	0.0884726	0.0374449	0.361481
s__Agathobaculum sp900544475	-0.219694	-0.0950277	0.0203244
s__Campylobacter_D upsaliensis	0.195145	0.0884024	0.0309378
s__Prevotella stercorea	0.0760062	0.0336026	0.412871
s__Agathobacter sp900317585	-0.0785367	-0.0340946	0.406058
s__Prevotella hominis	-0.248422	-0.105141	0.0102121
s__Sutterella faecalis	0.132296	0.0638439	0.119484
s__Sutterella sp934255515	0.137425	0.0648054	0.114006
s__Bacteroides nordii	-0.185848	-0.0786576	0.0549565
s__Streptococcus macedonicus	-0.0174635	-0.00739121	0.857101
s__Faecalibacterium prausnitzii_I	-0.185101	-0.084379	0.0394652
s__ER4 sp900317525	-0.152018	-0.0704713	0.0856234
s__RUG115 sp900066395	-0.275415	-0.124376	0.00235127
s__Lachnospira sp000437735	-0.177544	-0.0772138	0.0595807
s__Dialister sp934193095	0.152552	0.0645658	0.115352
s__Prevotella sp900546575	0.189259	0.0801015	0.0506348
s__Prevotella sp900313215	-0.238128	-0.100785	0.0138331
s__Streptococcus sp934196125	0.110388	0.0467205	0.254778
s__Mitsuokella multacida	0.178364	0.0785712	0.0552245
s__CAG-245 sp000435175	-0.142719	-0.0628982	0.12507
s__Ventrimonas sp900555625	-0.0386807	-0.0180074	0.660858
s__Alistipes onderdonkii	-0.302785	-0.12815	0.00171907
s__Ruminococcus_C sp000433635	-0.243232	-0.106395	0.00933971
s__COE1 sp001916965	-0.153279	-0.0718558	0.0796349
s__Eubacterium_I ramulus_A	-0.0494038	-0.0227731	0.578986
s__Prevotella sp003447235	0.123724	0.0546283	0.182912
s__Prevotella sp900543975	-0.0776349	-0.0338992	0.408756
s__Eubacterium_G ventriosum	-0.341301	-0.151298	0.000209505
s__Collinsella sp900754075	-0.0955951	-0.0414983	0.31182
s__CAG-103 sp900543625	-0.151199	-0.0665866	0.104381
s__Bifidobacterium adolescentis	-0.210652	-0.090888	0.0265008
s__Brachyspira pilosicoli	-0.167696	-0.0709751	0.0834038
s__Anaerostipes sp900066705	-0.240463	-0.107025	0.00892668
s__CAG-245 sp934131055	-0.161854	-0.0705465	0.0852894
s__Alloprevotella sp900540885	-0.123737	-0.0523703	0.201703
s__Zag111 sp002103105	-0.033315	-0.0147466	0.719391
s__Megasphaera sp900540735	0.287408	0.127235	0.00185616
s__Prevotella sp002251385	0.141839	0.0634917	0.121541
s__Stercorousia sp001765415	0.113613	0.0480851	0.241149
s__Campylobacter_D coli	0.141626	0.0622536	0.128993
s__Ruminococcus_C callidus	-0.0318495	-0.0149074	0.716461
s__UBA1417 sp003531055	-0.0919668	-0.0389238	0.342817
s__Agathobacter sp905209075	-0.318165	-0.140765	0.000567974
s__Schaedlerella sp900066545	-0.289606	-0.122572	0.00272299
s__Helicobacter_B fennelliae	0.0878315	0.0371736	0.364973
s__Parolsenella catena	0.146507	0.0676584	0.0989071
s__Prevotella sp900544825	0.033739	0.0158452	0.699465
s__Eubacterium_R sp000436835	-0.139862	-0.0591948	0.148919
s__Ventrenecus sp905205665	-0.353323	-0.149539	0.000248621
s__Prevotella sp015074785	-0.0573153	-0.025513	0.534175
s__Vescimonas sp000435975	-0.132577	-0.0561113	0.171295
s__Prevotella sp900767615	-0.109245	-0.0462365	0.259739
s__Blautia_A sp900066335	-0.113013	-0.0478314	0.243643
s__Dysosmobacter sp001916835	-0.246068	-0.112994	0.00575183
s__Faecalibacterium prausnitzii_J	-0.237708	-0.104714	0.0105253
s__Faecalibacterium sp905215595	-0.101188	-0.0464092	0.257961
s__Campylobacter_D sp900539255	0.0652567	0.0276191	0.50096
s__CAG-103 sp000432375	-0.123706	-0.053977	0.188194
s__Faecalibacterium sp900758465	-0.291573	-0.123404	0.00254529
s__Holdemanella sp900547815	0.0193842	0.00837852	0.83826
s__Mediterraneibacter sp934309345	-0.0147911	-0.00692186	0.866087
s__Megasphaera elsdenii	0.305665	0.129369	0.00155098
s__Prevotella sp000434975	0.054618	0.0231164	0.573276
s__Ruminococcus_E sp003526955	-0.10539	-0.047541	0.246521
s__Eubacterium_R sp900542875	-0.446564	-0.189003	3.37781e-06
s__Eubacterium_F sp003491505	-0.252546	-0.113433	0.00556471
s__Limosilactobacillus portuensis	0.198609	0.0943078	0.0212986
s__Phascolarctobacterium_A succinatutens	-0.228009	-0.0965021	0.0184495
s__Bacteroides clarus	-0.151936	-0.0643049	0.116832
s__Ruminococcus_D bicirculans	-0.289524	-0.122537	0.00273063
s__Roseburia sp003470905	-0.375339	-0.168649	3.49905e-05
s__Ruminococcus_E sp934476515	-0.45493	-0.203596	5.37055e-07
s__CAG-95 sp900066375	-0.119891	-0.0521559	0.203558
s__Wujia chipingensis	-0.182055	-0.0807627	0.0487526
s__Akkermansia muciniphila_B	0.129119	0.056506	0.168298
s__Bulleidia sp900539965	-0.277318	-0.122664	0.00270283
s__UMGS1820 sp902797885	0.388363	0.16437	5.53491e-05
s__Ruminococcus_D sp934435205	-0.194457	-0.0855747	0.0367445
s__Vescimonas sp000435555	-0.173146	-0.0758047	0.0643993
s__Roseburia intestinalis	-0.257845	-0.10913	0.0076629
s__Megasphaera sp001546855	0.0363533	0.0179014	0.662731
s__Prevotella copri	-0.0243479	-0.0108266	0.791963
s__CAG-269 sp003525075	-0.213209	-0.0943919	0.0211829
s__Butyribacter sp000436755	-0.283548	-0.13026	0.0014377
s__Faecalibacterium sp934524985	-0.025664	-0.0116916	0.775768
s__Faecalibacterium sp014858325	-0.148905	-0.0670641	0.101913
s__Blautia stercoris	-0.244011	-0.107999	0.00832037
s__Lachnospira sp000436535	-0.0421158	-0.017825	0.664082
s__Megasphaera massiliensis	0.264723	0.115102	0.00490136
s__Bifidobacterium catenulatum	-0.285136	-0.128543	0.00166317
s__CAG-103 sp900757655	-0.0305489	-0.0129294	0.752763
s__Parabacteroides goldsteinii	0.0164003	0.00709343	0.8628
s__Blautia_A schinkii	-0.00914575	-0.00387082	0.92487
s__Limosilactobacillus reuteri_E	-0.107079	-0.0488153	0.234069
s__Megasphaera sp900554215	0.338526	0.152859	0.000179693
s__Coprococcus eutactus_A	-0.262568	-0.114089	0.00529465
s__Bifidobacterium animalis	-0.0829687	-0.0403505	0.325404
s__Faecalibacterium sp003449675	-0.133958	-0.0566965	0.166866
s__Blautia_A sp900066205	0.0248514	0.010518	0.797761
s__Barnesiella intestinihominis	0.104385	0.0441798	0.281558
s__Phocaeicola coprocola	0.0879618	0.0372287	0.364261
s__Anaerostipes sp018918155	0.161486	0.0727333	0.0760186
s__Prevotella sp900546535	-0.102105	-0.0432147	0.292211
s__Faecousia sp900549705	-0.291147	-0.128539	0.00166367
s__CAG-882 sp003486385	-0.277212	-0.126999	0.00189306
s__Vescimonas fastidiosa	-0.164814	-0.0697554	0.0888597
s__Megasphaera sp002319965	0.311511	0.139458	0.000639826
s__Lactobacillus crispatus	0.121372	0.0527609	0.198356
s__Veillonella_A seminalis	0.15936	0.072694	0.0761776
s__Parolsenella massiliensis	0.0890646	0.0376955	0.358275
s__Vescimonas sp001916855	-0.0499672	-0.021148	0.60637
s__Dialister invisus	-0.00900227	-0.00381009	0.926046
s__Prevotella sp021636625	-0.126883	-0.0537015	0.190462
s__Phascolarctobacterium faecium	0.0312939	0.0132447	0.746937
s__Gemmiger variabilis_B	-0.0339824	-0.0143826	0.726034
s__Alloprevotella sp900539625	-0.141904	-0.0600589	0.143066
s__Butyricicoccus_A intestinisimiae	0.0331384	0.0140254	0.732576
s__Prevotella sp000436035	0.0742959	0.0314448	0.443532
s__Parolsenella uli_A	0.198024	0.0913699	0.0257071
s__Aeromonas caviae	-0.204657	-0.0893333	0.0292066
s__Clostridium butyricum	-0.154421	-0.0674756	0.0998243
s__Butyrivibrio_A crossotus	-0.192132	-0.0813175	0.0472188
s__CAG-317 sp000433215	0.0593972	0.0251391	0.540185
s__CAG-177 sp003514385	0.0278296	0.0117785	0.774146
s__Bifidobacterium sp022739095	-0.103174	-0.0462574	0.259522
s__Vescimonas sp003539495	-0.131731	-0.0557535	0.174046
s__CAG-274 sp900545305	-0.137579	-0.061823	0.131666
s__Faecalibacterium sp934525735	-0.10698	-0.0495204	0.227375
s__Parabacteroides massiliensis	0.0947902	0.0401187	0.328193
s__Butyribacter intestini	-0.300085	-0.127007	0.00189173
s__CAG-568 sp000434395	0.384848	0.167692	3.88095e-05
s__Prevotella copri_C	0.0289947	0.0127599	0.755902
s__Campylobacter_D sp934718785	-0.0215052	-0.00964023	0.814318
s__Anaerostipes rhamnosivorans	0.146684	0.0641342	0.117809
s__Onthousia sp934130405	-0.0524581	-0.0222022	0.588539
s__CAG-45 sp000438375	-0.227644	-0.0963473	0.0186389
s__Roseburia_A sp934364805	-0.11978	-0.0506955	0.216521
s__Prevotella sp934202525	0.149283	0.063182	0.123373
s__Prevotella sp000436915	-0.0105556	-0.00446754	0.913331
s__Phascolarctobacterium_A sp900753045	0.0383537	0.0162327	0.692485
s__Eubacterium_R sp900539165	-0.260811	-0.110385	0.00698771
s__Cryptobacteroides sp000435075	0.0141265	0.00597888	0.884191
s__Phocaeicola sp000434735	0.141313	0.0631736	0.123422
s__Zag111 sp002102825	0.0924407	0.0391243	0.340333
s__Phascolarctobacterium_A sp022718015	0.0518907	0.0219621	0.592579
s__Ruminococcus_E sp003438075	-0.123004	-0.0520599	0.204392
s__CAG-170 sp000436735	-0.0196172	-0.00830273	0.839703
s__Megasphaera stantonii	0.352254	0.157698	0.000110616
s__Prevotella sp900555035	0.0734817	0.0311002	0.448546
s__Acidaminococcus intestini	0.417365	0.189648	3.1231e-06
s__CAG-307 sp900547045	-0.167366	-0.0708354	0.0840145
s__CAG-307 sp001916215	-0.19351	-0.0819007	0.0456505
s__Sutterella sp900770335	-0.176339	-0.0746331	0.0686461
s__Prevotella sp900551275	-0.0221518	-0.00991495	0.809127
s__Comamonas kerstersii	-0.0405338	-0.0171554	0.67597
s__Bifidobacterium angulatum	0.217781	0.0967237	0.018181
s__Phascolarctobacterium_A sp934190775	0.0973017	0.0411817	0.315529
s__CAG-269 sp001916065	-0.282556	-0.119588	0.00345681
s__Evtepia gabavorous	0.233825	0.100646	0.0139649
s__Helicobacter_C cinaedi	0.128743	0.0599426	0.143844
s__Eubacterium_F sp900539115	-0.079513	-0.0336528	0.412172
s__Agathobacter sp900543445	-0.123425	-0.0522379	0.202847
s__Coprobacter fastidiosus	-0.0324028	-0.0137141	0.738292
s__Mesosutterella multiformis	0.208038	0.094166	0.0214954
s__Cetobacterium_A sp934085975	0.106306	0.0449926	0.272791
s__Prevotella sp002299635	0.148768	0.0673295	0.100562
s__Parolsenella sp900549525	0.289422	0.144049	0.000419152
s__Agathobacter sp900552085	-0.23366	-0.0988938	0.0157283
s__Prevotella sp900548745	0.141318	0.0598112	0.144725
s__Faecalibacterium prausnitzii_F	-0.0774522	-0.0327807	0.424399
s__Alloprevotella sp900541575	0.102743	0.0434847	0.289204
s__Acidaminococcus massiliensis	0.274599	0.124386	0.00234929
s__Faecalibacterium sp900551435	0.112758	0.0477233	0.244711
s__UBA10281 sp900767885	0.107081	0.0453207	0.269306
s__Anaerovibrio sp900548165	0.0973153	0.0411875	0.315461
s__Prevotella sp900553155	0.0711882	0.0314966	0.442781
s__Caecibacter sp003467125	0.26197	0.117374	0.00411299
s__Eubacterium_R sp000433975	-0.101724	-0.0430533	0.29402
s__SFJ001 sp934513685	-0.069544	-0.0294336	0.473243
s__Prevotella sp945863825	0.0716716	0.0309383	0.450912
s__VUNA01 sp002299625	0.220594	0.0933637	0.0226377
s__Eubacterium_R sp900539325	0.179961	0.0761663	0.0631333
s__UMGS2037 sp934371505	-0.0580255	-0.0245585	0.549585
s__Prevotella sp900553595	0.14746	0.0665187	0.104736
s__Parolsenella sp900544655	0.065072	0.030115	0.463056
s__Vescimonas sp900547745	0.162742	0.0688784	0.092957
s__Duodenibacillus intestinavium	0.138966	0.0604545	0.140446
s__Prevotella copri_B	0.0291834	0.0132536	0.746774
s__Prevotella buccae	0.262756	0.113846	0.00539351
s__Mitsuokella jalaludinii	0.293657	0.138945	0.000670267
s__Dialister succinatiphilus	0.191947	0.085238	0.0374941
s__Zag111 sp003258735	-0.00653156	-0.0027644	0.946306
s__CAG-603 sp900066105	-0.0867517	-0.0367166	0.370902
s__Prevotella sp900552675	0.143864	0.0608887	0.137613
s__Anaerobutyricum sp934307085	0.338093	0.143094	0.00045819
s__CAG-448 sp003150135	0.302181	0.127894	0.00175641
s__Stercorousia sp900769355	0.195254	0.082639	0.043728
s__Vescimonas sp900545495	0.044272	0.0187375	0.648015
s__Dialister sp934178345	0.187108	0.0838554	0.0407094
s__Butyrivibrio_A sp000431815	0.172395	0.0729641	0.0750901
s__CAG-194 sp000432915	-0.219375	-0.0928475	0.0234002
s__Prevotella sp934230115	0.0868397	0.0376286	0.359128
s__Prevotella sp900556795	0.123041	0.0533347	0.193513
s__Faecalibacterium sp934511465	0.130865	0.0565776	0.167759
s__UBA6398 sp003150315	0.378132	0.160039	8.70257e-05
s__CAG-605 sp000433475	0.0689207	0.0299225	0.465922
s__Prevotella sp900765465	0.188425	0.0797486	0.0516639
s__Providencia alcalifaciens_A	0.170098	0.0742111	0.070231
s__Pseudoruminococcus massiliensis	0.121114	0.0526095	0.199649
s__Helicobacter_D pullorum	0.17916	0.0783687	0.0558571
s__g__Sutterella__47660_4#31_clean_bin.2.strict_cleaned	0.231713	0.101992	0.0127304
s__g__Bifidobacterium__39923_2#166_bin.30.strict_clean	0.184044	0.0806714	0.0490088
s__Bacteroides faecis	0.171113	0.0772639	0.059415
s__Sellimonas intestinalis	0.218561	0.0962875	0.0187125
s__Sodaliphilus sp004557565	0.158834	0.0672243	0.101096
s__14-2 sp012519695	0.0459811	0.0194609	0.635394
s__Megasphaera elsdenii_A	0.195753	0.0870359	0.0336375
s__Akkermansia muciniphila_E	0.347241	0.151622	0.000202958
s__Scatocola faecipullorum	0.0843264	0.0356901	0.384435
s__Scybalousia sp900542735	-0.00400821	-0.00169642	0.967034
s__Dialister hominis	0.303869	0.134034	0.00103762
s__Catenibacterium sp900764565	0.28449	0.124226	0.00238029
s__Oribacterium sp900770445	0.128797	0.0621509	0.129626
s__Acidaminococcus sp000437815	0.311791	0.139169	0.000656769
s__Faecalibacterium sp934525845	0.34386	0.145534	0.000364581
s__Anaerovibrio sp934203205	0.263751	0.115228	0.00485412
s__CAG-266 sp000436095	0.124292	0.0540325	0.18774
s__Megamonas gallistercoris	0.330709	0.145278	0.000373513
s__Cryptobacteroides sp900544195	0.344086	0.151484	0.000205735
s__CAG-196 sp900553895	0.0621987	0.0263248	0.521242
s__NHYM01 sp944323755	0.178943	0.0787476	0.0546784
s__Phascolarctobacterium_A sp900551335	0.328893	0.1392	0.000654964
s__Brachyspira sp934747485	0.0822349	0.0355432	0.386396
s__CAG-353 sp900066885	0.180779	0.0765123	0.0619408
s__CAG-353 sp900768995	0.154538	0.0654064	0.110683
s__Ligilactobacillus agilis	0.226146	0.102022	0.0127043
s__CAG-390 sp000437015	0.0883769	0.0390824	0.340852
s__CAG-793 sp000433915	0.17251	0.0746559	0.0685615
s__PeH17 sp000435055	0.186559	0.081402	0.0469888
s__RUG410 sp900769705	0.434512	0.183902	6.21961e-06
s__Eubacterium_R sp934525195	0.00767235	0.00339071	0.934166
s__UBA3789 sp900543055	0.134189	0.0576053	0.160158
s__UBA1221 sp900770525	0.17593	0.0774488	0.0588068
s__Phocaeicola coprophilus	0.18647	0.0837885	0.0408705
s__Cryptobacteroides sp934700615	0.237978	0.103954	0.0111044
s__CAG-269 sp900552555	0.0419603	0.0182974	0.655745
s__CAG-964 sp000435335	0.0499178	0.0217926	0.595439
s__Eubacterium_R sp900539775	-0.0209948	-0.00945222	0.817875
s__UBA10281 sp900556195	0.179605	0.0803041	0.0500515
s__Mesosutterella massiliensis	0.263929	0.119251	0.0035502
s__UBA1829 sp900549415	0.280294	0.121461	0.00297792
s__Clostridium sp900539375	-0.0321011	-0.0138327	0.736112
s__RUG410 sp900553115	0.11853	0.0522828	0.202458
s__CAG-605 sp934098565	-0.0148232	-0.00701679	0.864268
s__Succinivibrio sp934218695	0.238951	0.106171	0.00949057
s__Cryptobacteroides sp000432515	0.11861	0.0533903	0.193047
s__Lactobacillus absiana	0.295331	0.140983	0.000556706
s__CAG-724 sp905202255	0.15256	0.0678961	0.0977247
s__Prevotella sp022732315	0.135234	0.0657726	0.108696
s__Salmonella enterica	0.0773104	0.0350378	0.393189
s__Phocaeicola barnesiae	0.292559	0.132014	0.0012368
s__Phocaeicola massiliensis	0.0629743	0.0287539	0.483526
