# Supplementary material for: Ancestral trajectory of infant gut microbiome assembly in non-industrialised populations
Source: Research Square preprint supplement (doi:10.21203/rs.3.rs-6675732/v1), 2025-05-30
Supplement: Supplementary file 10 [file 9d46f95cfe7d1701c46e422b.xlsx]

## Sheet: Sheet1
species	kingroup
s__Dialister sp900538805	g__Dialister
s__Dialister sp900541485	g__Dialister
s__Dialister sp934193095	g__Dialister
s__Dialister succinatiphilus	g__Dialister
s__Dialister sp900543165	g__Dialister
s__Dialister sp000434475	g__Dialister
s__Dialister sp900759415	g__Dialister
s__Dialister invisus	g__Dialister
s__Dialister hominis	g__Dialister
s__Dialister sp900543455	g__Dialister
s__Dialister sp022722495	g__Dialister
s__Dialister sp934178345	g__Dialister
s__Veillonella sp900549805	o__Veillonellales
s__Veillonella sp905209685	o__Veillonellales
s__Veillonella sp019414865	o__Veillonellales
s__Veillonella sp900766125	o__Veillonellales
s__Veillonella tobetsuensis	o__Veillonellales
s__Veillonella_A sp015058545	o__Veillonellales
s__Caecibacter massiliensis	o__Veillonellales
s__Megasphaera elsdenii	o__Veillonellales
s__Veillonella sp934230905	o__Veillonellales
s__Megasphaera sp934193515	o__Veillonellales
s__Veillonella sp003463825	o__Veillonellales
s__Megasphaera sp002319965	o__Veillonellales
s__Megasphaera sp900540735	o__Veillonellales
s__Veillonella sp900550175	o__Veillonellales
s__Megasphaera stantonii	o__Veillonellales
s__Veillonella sp022737715	o__Veillonellales
s__Caecibacter sp003467125	o__Veillonellales
s__Veillonella nakazawae	o__Veillonellales
s__Veillonella atypica	o__Veillonellales
s__Veillonella_A seminalis	o__Veillonellales
s__Veillonella sp900538355	o__Veillonellales
s__Veillonella sp900552715	o__Veillonellales
s__Veillonella infantium	o__Veillonellales
s__Veillonella_A ratti	o__Veillonellales
s__Megasphaera sp000417505	o__Veillonellales
s__g__Veillonella_A__39907_2#115_bin.10.strict_clean	o__Veillonellales
s__Veillonella sp900757715	o__Veillonellales
s__Veillonella_A magna	o__Veillonellales
s__Veillonella parvula_A	o__Veillonellales
s__Veillonella sp934183145	o__Veillonellales
s__g__Veillonella__47660_4#28_clean_bin.18.orig_cleaned	o__Veillonellales
s__Veillonella sp934202215	o__Veillonellales
s__Veillonella sp915069625	o__Veillonellales
s__F0422 sp003999875	o__Veillonellales
s__Veillonella sp934216375	o__Veillonellales
s__Veillonella_A sp000431435	o__Veillonellales
s__Veillonella sp900550455	o__Veillonellales
s__Veillonella rogosae	o__Veillonellales
s__Veillonella sp900765235	o__Veillonellales
s__Veillonella sp002959755	o__Veillonellales
s__Veillonella dispar	o__Veillonellales
s__Megasphaera sp001546855	o__Veillonellales
s__Anaeroglobus micronuciformis	o__Veillonellales
s__Veillonella sp934202095	o__Veillonellales
s__Veillonella sp900545205	o__Veillonellales
s__Veillonella sp900549845	o__Veillonellales
s__Veillonella sp905214495	o__Veillonellales
s__Veillonella sp019419725	o__Veillonellales
s__Veillonella sp902834965	o__Veillonellales
s__Veillonella sp018367495	o__Veillonellales
s__Megasphaera sp900554215	o__Veillonellales
s__Veillonella parvula	o__Veillonellales
s__Veillonella_A sp900765165	o__Veillonellales
s__Veillonella sp900556785	o__Veillonellales
s__Megasphaera elsdenii_A	o__Veillonellales
s__Megasphaera massiliensis	o__Veillonellales
s__Veillonella sp915066865	o__Veillonellales
s__Veillonella sp934190855	o__Veillonellales
s__Veillonella sp900552445	o__Veillonellales
s__Klebsiella africana	f__Enterobacteriaceae
s__Proteus sp011046025	f__Enterobacteriaceae
s__Enterobacter asburiae_B	f__Enterobacteriaceae
s__Enterobacter mori	f__Enterobacteriaceae
s__Enterobacter sp000568095	f__Enterobacteriaceae
s__Proteus sp003144505	f__Enterobacteriaceae
s__Enterobacter sp019968765	f__Enterobacteriaceae
s__Enterobacter chengduensis	f__Enterobacteriaceae
s__Escherichia ruysiae	f__Enterobacteriaceae
s__Citrobacter_B koseri	f__Enterobacteriaceae
s__Kluyvera ascorbata	f__Enterobacteriaceae
s__Klebsiella pneumoniae	f__Enterobacteriaceae
s__Enterobacter chuandaensis	f__Enterobacteriaceae
s__Escherichia sp005843885	f__Enterobacteriaceae
s__Klebsiella oxytoca	f__Enterobacteriaceae
s__Escherichia coli	f__Enterobacteriaceae
s__Enterobacter quasihormaechei	f__Enterobacteriaceae
s__Escherichia sp004211955	f__Enterobacteriaceae
s__Leclercia adecarboxylata	f__Enterobacteriaceae
s__Enterobacter roggenkampii	f__Enterobacteriaceae
s__Enterobacter cloacae_Q	f__Enterobacteriaceae
s__Enterobacter cloacae_M	f__Enterobacteriaceae
s__Proteus mirabilis	f__Enterobacteriaceae
s__Klebsiella ornithinolytica	f__Enterobacteriaceae
s__Proteus cibarius	f__Enterobacteriaceae
s__Enterobacter hormaechei_A	f__Enterobacteriaceae
s__Enterobacter bugandensis	f__Enterobacteriaceae
s__Enterobacter hormaechei	f__Enterobacteriaceae
s__Enterobacter cloacae	f__Enterobacteriaceae
s__Cronobacter sakazakii	f__Enterobacteriaceae
s__Yersinia enterocolitica	f__Enterobacteriaceae
s__Proteus mirabilis_B	f__Enterobacteriaceae
s__Enterobacter vonholyi	f__Enterobacteriaceae
s__Morganella morganii	f__Enterobacteriaceae
s__Citrobacter portucalensis	f__Enterobacteriaceae
s__Kluyvera sichuanensis	f__Enterobacteriaceae
s__Proteus terrae	f__Enterobacteriaceae
s__Escherichia albertii	f__Enterobacteriaceae
s__Kluyvera ascorbata_C	f__Enterobacteriaceae
s__Kluyvera georgiana_A	f__Enterobacteriaceae
s__Salmonella houtenae	f__Enterobacteriaceae
s__Citrobacter freundii	f__Enterobacteriaceae
s__Providencia alcalifaciens	f__Enterobacteriaceae
s__Escherichia sp002965065	f__Enterobacteriaceae
s__Klebsiella variicola	f__Enterobacteriaceae
s__Providencia rettgeri_F	f__Enterobacteriaceae
s__Enterobacter dykesii	f__Enterobacteriaceae
s__Escherichia fergusonii	f__Enterobacteriaceae
s__Enterobacter sp000493015	f__Enterobacteriaceae
s__Citrobacter werkmanii	f__Enterobacteriaceae
s__Providencia alcalifaciens_A	f__Enterobacteriaceae
s__Enterobacter kobei	f__Enterobacteriaceae
s__Enterobacter asburiae_D	f__Enterobacteriaceae
s__Salmonella enterica	f__Enterobacteriaceae
s__Enterobacter asburiae	f__Enterobacteriaceae
s__Klebsiella quasipneumoniae	f__Enterobacteriaceae
s__Klebsiella michiganensis	f__Enterobacteriaceae
s__Klebsiella aerogenes	f__Enterobacteriaceae
s__Klebsiella grimontii	f__Enterobacteriaceae
s__Cronobacter malonaticus	f__Enterobacteriaceae
s__Kluyvera georgiana	f__Enterobacteriaceae
s__Enterobacter cloacae_N	f__Enterobacteriaceae
s__Enterobacter asburiae_C	f__Enterobacteriaceae
s__Citrobacter youngae	f__Enterobacteriaceae
s__Alloprevotella sp900539625	g__Prevotella
s__Prevotella sp000434975	g__Prevotella
s__Alloprevotella sp934255485	g__Prevotella
s__Alloprevotella sp015257125	g__Prevotella
s__Prevotella sp900290275	g__Prevotella
s__Prevotella sp900544495	g__Prevotella
s__Prevotella sp900548195	g__Prevotella
s__Alloprevotella sp916438195	g__Prevotella
s__Prevotella pallens	g__Prevotella
s__Prevotella sp900553595	g__Prevotella
s__Prevotella copri_D	g__Prevotella
s__Prevotella lascolaii	g__Prevotella
s__Prevotella sp002299635	g__Prevotella
s__Prevotella sp934230115	g__Prevotella
s__Prevotella sp900546575	g__Prevotella
s__Prevotella buccae	g__Prevotella
s__Prevotella sp900551985	g__Prevotella
s__Prevotella sp900313215	g__Prevotella
s__Prevotella hominis	g__Prevotella
s__Paraprevotella stercorigallinarum	g__Prevotella
s__Prevotella sp900556795	g__Prevotella
s__Prevotella sp021636625	g__Prevotella
s__Prevotella sp022732315	g__Prevotella
s__UBA6398 sp900550635	g__Prevotella
s__Prevotella sp900544825	g__Prevotella
s__Prevotella salivae	g__Prevotella
s__Prevotella sp900552515	g__Prevotella
s__Prevotella intermedia	g__Prevotella
s__Prevotella sp900557255	g__Prevotella
s__Prevotella sp900557035	g__Prevotella
s__Prevotella sp000436915	g__Prevotella
s__Alloprevotella sp900541575	g__Prevotella
s__Alloprevotella sp900752815	g__Prevotella
s__UBA6398 sp003150315	g__Prevotella
s__Prevotella sp934196725	g__Prevotella
s__Alloprevotella sp900546605	g__Prevotella
s__Prevotella sp900552675	g__Prevotella
s__Paraprevotella clara	g__Prevotella
s__Prevotella copri_C	g__Prevotella
s__Prevotella sp003447235	g__Prevotella
s__Prevotella sp934202525	g__Prevotella
s__Prevotella sp900557405	g__Prevotella
s__UBA4372 sp900543815	g__Prevotella
s__Prevotella sp900546535	g__Prevotella
s__Prevotella sp002265625	g__Prevotella
s__Prevotella sp934191715	g__Prevotella
s__Prevotella sp002251385	g__Prevotella
s__Prevotella sp934204655	g__Prevotella
s__Prevotella histicola	g__Prevotella
s__Prevotella sp900554835	g__Prevotella
s__Alloprevotella sp900768625	g__Prevotella
s__Alloprevotella sp900542795	g__Prevotella
s__Prevotella pectinovora	g__Prevotella
s__Alloprevotella timonensis	g__Prevotella
s__Prevotella sp934254985	g__Prevotella
s__Prevotella copri	g__Prevotella
s__Prevotella sp015074785	g__Prevotella
s__Prevotella sp022769285	g__Prevotella
s__Prevotella sp022775985	g__Prevotella
s__Prevotella sp900556395	g__Prevotella
s__Prevotella sp900548745	g__Prevotella
s__Prevotella stercorea	g__Prevotella
s__Prevotella sp900550035	g__Prevotella
s__Prevotella sp000436035	g__Prevotella
s__Prevotella sp900543975	g__Prevotella
s__Prevotella sp900555035	g__Prevotella
s__Prevotella oris	g__Prevotella
s__Prevotella sp900548535	g__Prevotella
s__Prevotella sp000467895	g__Prevotella
s__Prevotella sp945863825	g__Prevotella
s__Alloprevotella sp900540885	g__Prevotella
s__Prevotella sp002251295	g__Prevotella
s__Prevotella sp900765465	g__Prevotella
s__Prevotella copri_B	g__Prevotella
s__Prevotella copri_A	g__Prevotella
s__Prevotella sp900767615	g__Prevotella
s__Alloprevotella sp000438115	g__Prevotella
s__Alloprevotella sp900543155	g__Prevotella
s__Prevotella sp900551275	g__Prevotella
s__Prevotella sp900770515	g__Prevotella
s__Prevotella sp900553155	g__Prevotella
s__Alloprevotella tannerae	g__Prevotella
s__Brachyspira pilosicoli_B	Other
s__RUG572 sp900547945	Other
s__Haemophilus influenzae	Other
s__Haemophilus haemolyticus	Other
s__Neisseria subflava_A	Other
s__NHYM01 sp003364295	Other
s__Haemophilus haemolyticus_G	Other
s__Duodenibacillus sp900767875	Other
s__g__Haemophilus_D__38353_3#32_bin.10.orig_clean	Other
s__UBA1436 sp934662565	Other
s__Haemophilus_D parainfluenzae	Other
s__Sutterella sp905206365	Other
s__Desulfovibrio intestinigallinarum	Other
s__UBA1829 sp900549045	Other
s__Mesosutterella massiliensis	Other
s__Haemophilus_D parainfluenzae_K	Other
s__Helicobacter_A bilis	Other
s__Parasutterella sp900552195	Other
s__Haemophilus_D sp900756875	Other
s__Haemophilus_D parainfluenzae_O	Other
s__UBA11452 sp934661375	Other
s__Haemophilus haemolyticus_I	Other
s__Haemophilus influenzae_D	Other
s__g__Nanoperiomorbus__40054_3#181_bin.16.permissive_clean	Other
s__Neisseria flavescens_A	Other
s__Parasutterella gallistercoris	Other
s__Sutterella wadsworthensis	Other
s__Helicobacter_C japonicus	Other
s__Vibrio cholerae	Other
s__RUG410 sp934277435	Other
s__Haemophilus_D parainfluenzae_A	Other
s__Neisseria perflava_A	Other
s__Akkermansia muciniphila_E	Other
s__Brachyspira sp934747485	Other
s__Akkermansia muciniphila_A	Other
s__Brachyspira pilosicoli	Other
s__Anaerobiospirillum succiniciproducens	Other
s__Haemophilus_D sp001815355	Other
s__Helicobacter_D pullorum	Other
s__Haemophilus aegyptius	Other
s__g__Duodenibacillus__38222_6#10_bin.6.orig_clean	Other
s__Haemophilus influenzae_G	Other
s__Turicimonas muris	Other
s__Neisseria flavescens_C	Other
s__UBA11549 sp900768185	Other
s__Fusobacterium animalis	Other
s__Helicobacter_C cinaedi	Other
s__Haemophilus_D sp019423005	Other
s__Helicobacter_B sp001854545	Other
s__Victivallis lenta	Other
s__UBA1436 sp900541355	Other
s__Haemophilus_D sp905205995	Other
s__Helicobacter_F sp002287135	Other
s__CALXXL01 sp944392655	Other
s__Campylobacter_D jejuni	Other
s__Acinetobacter nosocomialis	Other
s__Fusobacterium_A ulcerans_A	Other
s__Haemophilus quentini	Other
s__Fusobacterium_A varium	Other
s__Treponema_D succinifaciens	Other
s__g__Sutterella__47660_4#31_clean_bin.2.strict_cleaned	Other
s__o__UBA3830__38353_3#12_bin.15.strict_clean	Other
s__Aphodousia secunda_B	Other
s__g__Haemophilus_D__39923_2#158_bin.13.orig_clean	Other
s__Neisseria subflava_B	Other
s__Sutterella seckii_A	Other
s__UBA4248 sp004554395	Other
s__Haemophilus_D sp900756155	Other
s__Aphodousia sp900553105	Other
s__Mailhella massiliensis	Other
s__Bilophila sp902373525	Other
s__RUG410 sp900769705	Other
s__Sutterella sp905198475	Other
s__Haemophilus_D sp905214375	Other
s__g__Aphodousia__39907_1#1_bin.10.strict_clean	Other
s__Haemophilus_D sp927911595	Other
s__Campylobacter_D sp934718785	Other
s__Ralstonia sp913056305	Other
s__Parasutterella excrementihominis	Other
s__Haemophilus_A parahaemolyticus	Other
s__Cetobacterium_A sp905216205	Other
s__Cetobacterium_A sp934085975	Other
s__Akkermansia muciniphila_B	Other
s__Desulfovibrio piger	Other
s__Haemophilus_D sp905215245	Other
s__Nanogingivalis sp934717805	Other
s__RUG410 sp934229625	Other
s__Haemophilus_A parahaemolyticus_A	Other
s__Bilophila wadsworthia	Other
s__Victivallis vadensis	Other
s__Campylobacter_D sp900772495	Other
s__Haemophilus_D parainfluenzae_M	Other
s__Haemophilus seminalis	Other
s__HGM16780 sp900538765	Other
s__Akkermansia sp905200945	Other
s__Helicobacter_D sp022766795	Other
s__Helicobacter_F avicola	Other
s__UBA1436 sp900540405	Other
s__RUG410 sp934277545	Other
s__Haemophilus_D parainfluenzae_N	Other
s__UBA2903 sp900768465	Other
s__Helicobacter_B fennelliae	Other
s__Sutterella merdavium	Other
s__Sutterella parvirubra	Other
s__Nanosynbacter sp900555425	Other
s__Helicobacter_C magdeburgensis	Other
s__Desulfovibrio fairfieldensis	Other
s__Desulfovibrio sp900243745	Other
s__Sutterella sp900762445	Other
s__UBA1829 sp002338895	Other
s__Acinetobacter baumannii	Other
s__Aeromonas caviae	Other
s__Sutterella wadsworthensis_A	Other
s__Bilophila sp900550745	Other
s__CACZYB01 sp016297965	Other
s__Sutterella sp934255515	Other
s__UBA1436 sp002329395	Other
s__Neisseria sp000186165	Other
s__Fusobacterium periodonticum_B	Other
s__Haemophilus haemolyticus_J	Other
s__Haemophilus_D sp905207935	Other
s__UBA1724 sp900548225	Other
s__Succinivibrio sp900555115	Other
s__Desulfovibrio sp900556755	Other
s__Duodenibacillus massiliensis	Other
s__RUG410 sp934271715	Other
s__Brachyspira aalborgi	Other
s__UBA11549 sp900550445	Other
s__Akkermansia muciniphila	Other
s__Campylobacter_D sp900539255	Other
s__Duodenibacillus sp900544255	Other
s__Haemophilus_D parainfluenzae_L	Other
s__RUG572 sp934643865	Other
s__UBA1829 sp900549415	Other
s__Fusobacterium pseudoperiodonticum	Other
s__Neisseria subflava	Other
s__Campylobacter_D coli	Other
s__Haemophilus_D sp900764435	Other
s__RUG410 sp900553115	Other
s__Succinivibrio sp934218695	Other
s__g__Nanogingivalis__39923_1#7_bin.20.permissive_clean	Other
s__Sutterella faecalis	Other
s__Scatocola faecipullorum	Other
s__Haemophilus_D sp900755445	Other
s__Duodenibacillus intestinigallinarum	Other
s__Fusobacterium_B sp900542625	Other
s__Neisseria perflava	Other
s__Fusobacterium_A mortiferum	Other
s__Merdousia sp002437405	Other
s__Haemophilus_D sp019423025	Other
s__Akkermansia sp900545155	Other
s__Nanosynbacter sp900555675	Other
s__UBA2903 sp900768875	Other
s__Treponema_D peruense	Other
s__Treponema_D sp900541945	Other
s__Neisseria subflava_D	Other
s__Comamonas kerstersii	Other
s__Campylobacter_D jejuni_D	Other
s__Mesosutterella multiformis	Other
s__Neisseria flavescens_B	Other
s__Haemophilus_A paraphrohaemolyticus	Other
s__Duodenibacillus intestinavium	Other
s__Helicobacter_F sp003364115	Other
s__Mailhella excrementigallinarum	Other
s__Haemophilus_D parainfluenzae_J	Other
s__Haemophilus influenzae_E	Other
s__Campylobacter infans	Other
s__NHYM01 sp944323755	Other
s__Fusobacterium periodonticum_D	Other
s__Haemophilus_D sp015255025	Other
s__Campylobacter_D upsaliensis	Other
s__Sutterella sp900770335	Other
s__Fusobacterium polymorphum	Other
s__Haemophilus_D sp001679485	Other
s__Succinivibrio sp000431835	Other
s__SFHR01 sp934271525	Other
s__Acinetobacter bereziniae	Other
s__Merdousia sp900545705	Other
s__Fusobacterium vincentii	Other
s__WG-1 sp900539665	Other
s__Lactobacillus sp910589175	o__Lactobacillales
s__Streptococcus parasanguinis	o__Lactobacillales
s__Streptococcus sp902363395	o__Lactobacillales
s__Streptococcus alactolyticus	o__Lactobacillales
s__Enterococcus_A raffinosus	o__Lactobacillales
s__Leuconostoc sp900554745	o__Lactobacillales
s__Streptococcus sp019414905	o__Lactobacillales
s__Lacticaseibacillus pantheris	o__Lactobacillales
s__Streptococcus sp905221375	o__Lactobacillales
s__Streptococcus sp905221505	o__Lactobacillales
s__Streptococcus parasanguinis_G	o__Lactobacillales
s__Periweissella fabalis	o__Lactobacillales
s__Streptococcus lutetiensis	o__Lactobacillales
s__Enterococcus_A raffinosus_A	o__Lactobacillales
s__Streptococcus parasanguinis_C	o__Lactobacillales
s__Lactobacillus gasseri	o__Lactobacillales
s__Streptococcus mitis_I	o__Lactobacillales
s__Streptococcus equinus_B	o__Lactobacillales
s__Granulicatella sp934193545	o__Lactobacillales
s__Streptococcus mitis_F	o__Lactobacillales
s__Limosilactobacillus timonensis	o__Lactobacillales
s__Limosilactobacillus reuteri_D	o__Lactobacillales
s__Limosilactobacillus ingluviei	o__Lactobacillales
s__Streptococcus gallolyticus	o__Lactobacillales
s__Limosilactobacillus mucosae	o__Lactobacillales
s__Limosilactobacillus gallistercoris	o__Lactobacillales
s__Lactobacillus paragasseri	o__Lactobacillales
s__Streptococcus sp900766505	o__Lactobacillales
s__Limosilactobacillus reuteri_E	o__Lactobacillales
s__Streptococcus sp013277415	o__Lactobacillales
s__Streptococcus pseudopneumoniae_G	o__Lactobacillales
s__Streptococcus mitis	o__Lactobacillales
s__Streptococcus pasteurianus	o__Lactobacillales
s__Enterococcus_G italicus	o__Lactobacillales
s__Leuconostoc falkenbergense	o__Lactobacillales
s__Dolosigranulum pigrum	o__Lactobacillales
s__Streptococcus pyogenes	o__Lactobacillales
s__Streptococcus mitis_H	o__Lactobacillales
s__Streptococcus mitis_C	o__Lactobacillales
s__Streptococcus sp905221355	o__Lactobacillales
s__Streptococcus australis_B	o__Lactobacillales
s__Streptococcus sp943912555	o__Lactobacillales
s__Streptococcus sp934215455	o__Lactobacillales
s__Streptococcus sp001813295	o__Lactobacillales
s__Streptococcus infantarius	o__Lactobacillales
s__Ligilactobacillus salivarius	o__Lactobacillales
s__Streptococcus parasanguinis_F	o__Lactobacillales
s__Streptococcus sp905221065	o__Lactobacillales
s__Pediococcus pentosaceus	o__Lactobacillales
s__Enterococcus_D gallinarum	o__Lactobacillales
s__Streptococcus sp905221455	o__Lactobacillales
s__Streptococcus parasanguinis_B	o__Lactobacillales
s__Streptococcus parasanguinis_A	o__Lactobacillales
s__Streptococcus parasanguinis_I	o__Lactobacillales
s__Streptococcus pseudopneumoniae_H	o__Lactobacillales
s__Streptococcus pneumoniae_E	o__Lactobacillales
s__Streptococcus sp905221105	o__Lactobacillales
s__Enterococcus_A avium	o__Lactobacillales
s__Limosilactobacillus fermentum	o__Lactobacillales
s__Streptococcus sp003521145	o__Lactobacillales
s__Streptococcus sp900550895	o__Lactobacillales
s__Streptococcus mutans	o__Lactobacillales
s__Streptococcus mitis_AV	o__Lactobacillales
s__Streptococcus sp013276795	o__Lactobacillales
s__Streptococcus mitis_BM	o__Lactobacillales
s__Limosilactobacillus antri	o__Lactobacillales
s__Streptococcus sp020089495	o__Lactobacillales
s__Lactobacillus johnsonii	o__Lactobacillales
s__Streptococcus parasanguinis_M	o__Lactobacillales
s__Streptococcus mitis_A	o__Lactobacillales
s__Streptococcus mitis_AK	o__Lactobacillales
s__Limosilactobacillus reuteri	o__Lactobacillales
s__Streptococcus mitis_BL	o__Lactobacillales
s__Streptococcus sp001810785	o__Lactobacillales
s__Enterococcus_G sp913775425	o__Lactobacillales
s__Streptococcus sp015594605	o__Lactobacillales
s__Streptococcus mitis_D	o__Lactobacillales
s__Lactobacillus sp944327175	o__Lactobacillales
s__Ligilactobacillus agilis	o__Lactobacillales
s__Streptococcus sp900755085	o__Lactobacillales
s__Streptococcus sp905221095	o__Lactobacillales
s__g__Streptococcus__47660_4#143_clean_bin.1.strict_cleaned	o__Lactobacillales
s__Streptococcus lactarius	o__Lactobacillales
s__Streptococcus oralis_W	o__Lactobacillales
s__Lactiplantibacillus pentosus	o__Lactobacillales
s__Lactobacillus absiana	o__Lactobacillales
s__Lactococcus garvieae	o__Lactobacillales
s__Enterococcus_B faecium	o__Lactobacillales
s__Granulicatella sp916049935	o__Lactobacillales
s__Lacticaseibacillus rhamnosus	o__Lactobacillales
s__Streptococcus sp000448565	o__Lactobacillales
s__Streptococcus sp905221215	o__Lactobacillales
s__Streptococcus mitis_BR	o__Lactobacillales
s__Limosilactobacillus coleohominis	o__Lactobacillales
s__Streptococcus mitis_K	o__Lactobacillales
s__Streptococcus sp902373455	o__Lactobacillales
s__Streptococcus sp019448285	o__Lactobacillales
s__Enterococcus_D casseliflavus	o__Lactobacillales
s__Streptococcus anginosus_C	o__Lactobacillales
s__Ligilactobacillus saerimneri	o__Lactobacillales
s__Enterococcus_B hirae	o__Lactobacillales
s__Streptococcus sp001813675	o__Lactobacillales
s__Streptococcus parasanguinis_D	o__Lactobacillales
s__Lactobacillus sp910589675	o__Lactobacillales
s__Streptococcus parasanguinis_N	o__Lactobacillales
s__Streptococcus sobrinus	o__Lactobacillales
s__Lactobacillus delbrueckii	o__Lactobacillales
s__Weissella confusa	o__Lactobacillales
s__Lactobacillus delbrueckii_B	o__Lactobacillales
s__Granulicatella adiacens_A	o__Lactobacillales
s__Streptococcus sp000187445	o__Lactobacillales
s__Streptococcus macedonicus	o__Lactobacillales
s__Streptococcus parasanguinis_J	o__Lactobacillales
s__Lacticaseibacillus paracasei	o__Lactobacillales
s__Streptococcus pneumoniae_C	o__Lactobacillales
s__Streptococcus pneumoniae_A	o__Lactobacillales
s__Streptococcus peroris	o__Lactobacillales
s__Enterococcus faecalis	o__Lactobacillales
s__Lactobacillus amylovorus	o__Lactobacillales
s__Streptococcus mitis_E	o__Lactobacillales
s__Streptococcus sp004166885	o__Lactobacillales
s__Streptococcus halitosis	o__Lactobacillales
s__Limosilactobacillus intestinipullorum	o__Lactobacillales
s__Streptococcus sp934229725	o__Lactobacillales
s__Streptococcus vestibularis	o__Lactobacillales
s__Ligilactobacillus ruminis	o__Lactobacillales
s__Lactococcus lactis	o__Lactobacillales
s__Limosilactobacillus vaginalis	o__Lactobacillales
s__Streptococcus anginosus	o__Lactobacillales
s__Streptococcus sp934196125	o__Lactobacillales
s__g__Streptococcus__47660_4#172_clean_bin.1.orig_cleaned	o__Lactobacillales
s__Enterococcus_C diestrammenae_A	o__Lactobacillales
s__Weissella confusa_B	o__Lactobacillales
s__Limosilactobacillus oris	o__Lactobacillales
s__Streptococcus parasanguinis_O	o__Lactobacillales
s__Streptococcus mitis_BJ	o__Lactobacillales
s__Limosilactobacillus portuensis	o__Lactobacillales
s__Streptococcus thermophilus	o__Lactobacillales
s__Lactococcus petauri	o__Lactobacillales
s__Weissella cibaria	o__Lactobacillales
s__Enterococcus_B durans	o__Lactobacillales
s__Streptococcus sp013277515	o__Lactobacillales
s__Streptococcus sp905221115	o__Lactobacillales
s__Streptococcus sp905221035	o__Lactobacillales
s__Streptococcus mitis_BV	o__Lactobacillales
s__Limosilactobacillus gastricus	o__Lactobacillales
s__Weissella paramesenteroides	o__Lactobacillales
s__Enterococcus_D innesii	o__Lactobacillales
s__Streptococcus mitis_BA	o__Lactobacillales
s__Streptococcus parasanguinis_E	o__Lactobacillales
s__Streptococcus sp024295625	o__Lactobacillales
s__Streptococcus troglodytae	o__Lactobacillales
s__Streptococcus mitis_AR	o__Lactobacillales
s__Streptococcus sp001556435	o__Lactobacillales
s__Streptococcus sp905221125	o__Lactobacillales
s__Leuconostoc lactis_A	o__Lactobacillales
s__Streptococcus mitis_AQ	o__Lactobacillales
s__Streptococcus mitis_AT	o__Lactobacillales
s__Streptococcus oralis_BN	o__Lactobacillales
s__Streptococcus salivarius	o__Lactobacillales
s__Streptococcus pneumoniae_B	o__Lactobacillales
s__Enterococcus_B lactis	o__Lactobacillales
s__Leuconostoc citreum	o__Lactobacillales
s__Streptococcus mitis_P	o__Lactobacillales
s__Streptococcus pseudopneumoniae_P	o__Lactobacillales
s__Streptococcus xiaochunlingii	o__Lactobacillales
s__Streptococcus parasanguinis_K	o__Lactobacillales
s__Streptococcus sp901875575	o__Lactobacillales
s__Lactobacillus crispatus	o__Lactobacillales
s__Pediococcus acidilactici	o__Lactobacillales
s__Streptococcus sp008727815	o__Lactobacillales
s__Streptococcus parasanguinis_L	o__Lactobacillales
s__Ligilactobacillus sp900765635	o__Lactobacillales
s__Streptococcus sp934216185	o__Lactobacillales
s__Streptococcus parasanguinis_P	o__Lactobacillales
s__Streptococcus sp903645285	o__Lactobacillales
s__Streptococcus sp905221545	o__Lactobacillales
s__Leuconostoc lactis	o__Lactobacillales
s__Streptococcus sp905221245	o__Lactobacillales
s__Streptococcus parasanguinis_H	o__Lactobacillales
s__Streptococcus mitis_J	o__Lactobacillales
s__Lactobacillus sp930989465	o__Lactobacillales
s__Lactiplantibacillus plantarum	o__Lactobacillales
s__Bacteroides intestinigallinarum	o__Bacteroidales
s__Limisoma sp900544305	o__Bacteroidales
s__Phocaeicola sp019414725	o__Bacteroidales
s__Bacteroides salyersiae	o__Bacteroidales
s__Bacteroides finegoldii	o__Bacteroidales
s__Bacteroides faecis	o__Bacteroidales
s__Phocaeicola plebeius_A	o__Bacteroidales
s__Cryptobacteroides sp900546925	o__Bacteroidales
s__Parabacteroides sp900549585	o__Bacteroidales
s__Alistipes_A sp900545315	o__Bacteroidales
s__Bacteroides uniformis	o__Bacteroidales
s__Phocaeicola_A sp900291465	o__Bacteroidales
s__Alistipes_A ihumii	o__Bacteroidales
s__Bacteroides bouchesdurhonensis	o__Bacteroidales
s__Phocaeicola sp000432735	o__Bacteroidales
s__Parabacteroides massiliensis	o__Bacteroidales
s__Coprobacter sp900545915	o__Bacteroidales
s__Cryptobacteroides sp900545245	o__Bacteroidales
s__Bacteroides sp900755095	o__Bacteroidales
s__Phocaeicola sp900760795	o__Bacteroidales
s__Dysgonomonas capnocytophagoides	o__Bacteroidales
s__Bacteroides congonensis	o__Bacteroidales
s__Bacteroides cellulosilyticus	o__Bacteroidales
s__Bacteroides xylanisolvens	o__Bacteroidales
s__Cryptobacteroides sp900541925	o__Bacteroidales
s__Parabacteroides gordonii	o__Bacteroidales
s__Alistipes excrementavium	o__Bacteroidales
s__Bacteroides clarus	o__Bacteroidales
s__Cryptobacteroides sp934700615	o__Bacteroidales
s__Phocaeicola vulgatus	o__Bacteroidales
s__Bacteroides caccae	o__Bacteroidales
s__Alistipes sp902388705	o__Bacteroidales
s__Bacteroides fragilis	o__Bacteroidales
s__Parabacteroides sp014287585	o__Bacteroidales
s__Alistipes_A indistinctus	o__Bacteroidales
s__Parabacteroides goldsteinii	o__Bacteroidales
s__Phocaeicola barnesiae	o__Bacteroidales
s__Cryptobacteroides sp000434935	o__Bacteroidales
s__Bacteroides rodentium	o__Bacteroidales
s__Phocaeicola coprophilus	o__Bacteroidales
s__Phocaeicola sp019414665	o__Bacteroidales
s__Phocaeicola sartorii	o__Bacteroidales
s__UBA7173 sp900545955	o__Bacteroidales
s__Butyricimonas sp900184685	o__Bacteroidales
s__Bacteroides sp012113595	o__Bacteroidales
s__RF16 sp900556095	o__Bacteroidales
s__Cryptobacteroides sp000435075	o__Bacteroidales
s__Phocaeicola plebeius	o__Bacteroidales
s__Sodaliphilus sp934667475	o__Bacteroidales
s__Alistipes_A sp900539755	o__Bacteroidales
s__Bacteroides caecimuris	o__Bacteroidales
s__Bacteroides ovatus	o__Bacteroidales
s__Cryptobacteroides sp000432515	o__Bacteroidales
s__Phocaeicola sp000434735	o__Bacteroidales
s__Bacteroides sp900555635	o__Bacteroidales
s__g__Parabacteroides__47542_1#14_clean_bin.1.orig_cleaned	o__Bacteroidales
s__Bacteroides eggerthii	o__Bacteroidales
s__Bacteroides thetaiotaomicron	o__Bacteroidales
s__Odoribacter sp900541415	o__Bacteroidales
s__Alistipes sp900541585	o__Bacteroidales
s__Phocaeicola faecium	o__Bacteroidales
s__Sodaliphilus sp004557565	o__Bacteroidales
s__Phocaeicola excrementipullorum	o__Bacteroidales
s__Cryptobacteroides sp000431015	o__Bacteroidales
s__Alistipes shahii	o__Bacteroidales
s__Parabacteroides distasonis_A	o__Bacteroidales
s__Bacteroides intestinalis_A	o__Bacteroidales
s__Coprobacter fastidiosus	o__Bacteroidales
s__Alistipes_A pullistercoris	o__Bacteroidales
s__Bacteroides zhangwenhongii	o__Bacteroidales
s__Parabacteroides distasonis	o__Bacteroidales
s__Bacteroides fragilis_A	o__Bacteroidales
s__Phocaeicola dorei	o__Bacteroidales
s__Bacteroides stercorirosoris	o__Bacteroidales
s__UBA7173 sp900546835	o__Bacteroidales
s__Merdimorpha sp003150615	o__Bacteroidales
s__Alistipes communis	o__Bacteroidales
s__Alistipes putredinis	o__Bacteroidales
s__Parabacteroides merdae	o__Bacteroidales
s__Parabacteroides acidifaciens	o__Bacteroidales
s__Bacteroides fragilis_B	o__Bacteroidales
s__Tidjanibacter inops	o__Bacteroidales
s__Coprobacter secundus	o__Bacteroidales
s__Alistipes finegoldii	o__Bacteroidales
s__Bacteroides sp900552405	o__Bacteroidales
s__Bacteroides cutis	o__Bacteroidales
s__Butyricimonas faecalis	o__Bacteroidales
s__Alistipes onderdonkii	o__Bacteroidales
s__Bacteroides stercoris	o__Bacteroidales
s__Phocaeicola coprocola	o__Bacteroidales
s__g__Parabacteroides__47680_3#18_clean_bin.12.orig_cleaned	o__Bacteroidales
s__Limisoma sp000437795	o__Bacteroidales
s__Phocaeicola faecicola	o__Bacteroidales
s__Bacteroides intestinalis	o__Bacteroidales
s__Hallerella sp934700345	o__Bacteroidales
s__Bacteroides sp900557355	o__Bacteroidales
s__Barnesiella intestinihominis	o__Bacteroidales
s__Bacteroides nordii	o__Bacteroidales
s__Bacteroides luhongzhouii	o__Bacteroidales
s__Phocaeicola massiliensis	o__Bacteroidales
s__Bacteroides sp019412865	o__Bacteroidales
s__Butyricimonas virosa	o__Bacteroidales
s__Parabacteroides johnsonii	o__Bacteroidales
s__Bacteroides sp900556625	o__Bacteroidales
s__Alistipes senegalensis	o__Bacteroidales
s__Cryptobacteroides sp000433355	o__Bacteroidales
s__UBA7173 sp910584365	o__Bacteroidales
s__Odoribacter splanchnicus	o__Bacteroidales
s__Bacteroides timonensis	o__Bacteroidales
s__Cryptobacteroides sp900544195	o__Bacteroidales
s__Butyricimonas faecihominis	o__Bacteroidales
s__Cryptobacteroides sp934725575	o__Bacteroidales
s__UBA11471 sp000434215	o__Bacteroidales
s__CAG-533 sp000434495	c__Clostridia
s__Anaerobutyricum sp934307085	c__Clostridia
s__CAG-582 sp000435515	c__Clostridia
s__CAG-882 sp900545175	c__Clostridia
s__Bulleidia sp934754415	c__Clostridia
s__Anaerostipes hadrus_A	c__Clostridia
s__Choladousia sp902363135	c__Clostridia
s__CAG-266 sp944390935	c__Clostridia
s__Anaerostipes sp905215045	c__Clostridia
s__Dorea_A longicatena_B	c__Clostridia
s__Eubacterium_F sp002435545	c__Clostridia
s__DXTB01 sp019410105	c__Clostridia
s__UMGS1865 sp900768535	c__Clostridia
s__Zhenhengia yiwuensis	c__Clostridia
s__Ventrimonas sp003506385	c__Clostridia
s__Anaerobutyricum hallii	c__Clostridia
s__Oliverpabstia intestinalis	c__Clostridia
s__Holdemanella sp900556915	c__Clostridia
s__CAG-710 sp000432595	c__Clostridia
s__CAG-449 sp000432895	c__Clostridia
s__Faecalibacterium longum	c__Clostridia
s__Faecalibacterium sp900551435	c__Clostridia
s__Faecalibacterium sp905215595	c__Clostridia
s__Holdemanella sp900547815	c__Clostridia
s__RUG115 sp900066395	c__Clostridia
s__CAG-269 sp003525075	c__Clostridia
s__Ventrimonas sp003480315	c__Clostridia
s__CAG-533 sp934098515	c__Clostridia
s__CAG-302 sp900543825	c__Clostridia
s__Faecalibacterium sp003449675	c__Clostridia
s__Anaerostipes sp900066705	c__Clostridia
s__Anaerostipes caccae	c__Clostridia
s__Phascolarctobacterium_A sp900551335	c__Clostridia
s__Dysosmobacter sp900544105	c__Clostridia
s__CAG-877 sp000433455	c__Clostridia
s__Negativicoccus succinicivorans	c__Clostridia
s__Romboutsia timonensis	c__Clostridia
s__Faecousia sp003525905	c__Clostridia
s__Bariatricus sp905216215	c__Clostridia
s__Enterocloster porci	c__Clostridia
s__Coprococcus sp900548215	c__Clostridia
s__CAG-45 sp000438375	c__Clostridia
s__UBA7597 sp900767195	c__Clostridia
s__Blautia_A obeum	c__Clostridia
s__Avilachnospira sp944381485	c__Clostridia
s__Bacteroides_F sp945865495	c__Clostridia
s__Ventrimonas sp900555625	c__Clostridia
s__CAG-177 sp003514385	c__Clostridia
s__Enterocloster bolteae	c__Clostridia
s__Ruminococcus_E bromii_B	c__Clostridia
s__Bulleidia sp900539965	c__Clostridia
s__Blautia_A sp000285855	c__Clostridia
s__RUG115 sp900315735	c__Clostridia
s__Eubacterium_R sp900540235	c__Clostridia
s__Acidaminococcus timonensis	c__Clostridia
s__Lachnospira sp000436535	c__Clostridia
s__Faecousia sp934667815	c__Clostridia
s__CAKPSH01 sp934183325	c__Clostridia
s__Allisonella histaminiformans	c__Clostridia
s__Blautia_A sp000436615	c__Clostridia
s__Eubacterium_G sp900548465	c__Clostridia
s__Avimicrobium caecorum	c__Clostridia
s__Dysosmobacter welbionis	c__Clostridia
s__Dysosmobacter sp019417795	c__Clostridia
s__Lawsonibacter sp905215425	c__Clostridia
s__ER4 sp900550165	c__Clostridia
s__CAG-170 sp002404795	c__Clostridia
s__HGM13010 sp905214605	c__Clostridia
s__Macrococcus_B caseolyticus	c__Clostridia
s__UBA10281 sp900556195	c__Clostridia
s__Agathobacter sp934316545	c__Clostridia
s__Coprococcus sp000154245	c__Clostridia
s__Onthousia sp934130405	c__Clostridia
s__CAKSHC01 sp934456365	c__Clostridia
s__CAG-302 sp001916775	c__Clostridia
s__CAG-603 sp900066105	c__Clostridia
s__CAG-269 sp934149075	c__Clostridia
s__Butyribacter sp934320845	c__Clostridia
s__Agathobacter sp900543445	c__Clostridia
s__Choladocola sp003480725	c__Clostridia
s__Beduini sp900550005	c__Clostridia
s__Lachnospira sp000437735	c__Clostridia
s__Lachnoclostridium phytofermentans_A	c__Clostridia
s__Finegoldia magna_H	c__Clostridia
s__V9D3004 sp002349525	c__Clostridia
s__Butyrivibrio_A sp000431815	c__Clostridia
s__CAG-269 sp001915995	c__Clostridia
s__CAG-170 sp934631005	c__Clostridia
s__Vescimonas sp900551355	c__Clostridia
s__Vescimonas sp934597345	c__Clostridia
s__CAG-317 sp000433215	c__Clostridia
s__Agathobacter sp905209075	c__Clostridia
s__CAG-194 sp000432915	c__Clostridia
s__Vescimonas sp000435975	c__Clostridia
s__Faecousia sp900540635	c__Clostridia
s__Ruminococcus_C sp934463425	c__Clostridia
s__Roseburia intestinalis	c__Clostridia
s__Agathobacter sp934365945	c__Clostridia
s__Faecousia sp900553805	c__Clostridia
s__Ruminococcus_D sp934435205	c__Clostridia
s__UMGS1820 sp902797885	c__Clostridia
s__CAG-269 sp905203195	c__Clostridia
s__UMGS1590 sp900552455	c__Clostridia
s__Ventrenecus sp934085565	c__Clostridia
s__RGIG9115 sp934486495	c__Clostridia
s__Anaerotignum lactatifermentans	c__Clostridia
s__Faecalibacterium sp934533135	c__Clostridia
s__RUG11198 sp934131005	c__Clostridia
s__Angelakisella sp900552845	c__Clostridia
s__Roseburia_A sp934359535	c__Clostridia
s__Anaerovibrio sp900548165	c__Clostridia
s__Agathobaculum sp934504345	c__Clostridia
s__HGM12814 sp900770165	c__Clostridia
s__Catenibacterium mitsuokai	c__Clostridia
s__UBA738 sp003522945	c__Clostridia
s__Lachnospira sp003537285	c__Clostridia
s__CAG-882 sp000435595	c__Clostridia
s__Butyribacter sp003529475	c__Clostridia
s__RUG11198 sp934149245	c__Clostridia
s__CAG-269 sp945865665	c__Clostridia
s__g__Hungatella_A__39923_2#170_bin.14.orig_clean	c__Clostridia
s__CAG-724 sp003524145	c__Clostridia
s__Agathobaculum sp003481705	c__Clostridia
s__Lawsonibacter pullicola	c__Clostridia
s__Dysosmobacter sp900550685	c__Clostridia
s__Thomasclavelia spiroformis	c__Clostridia
s__W0P33-017 sp934351445	c__Clostridia
s__Clostridium tertium	c__Clostridia
s__Blautia_A sp900551715	c__Clostridia
s__Eubacterium_F sp000433735	c__Clostridia
s__Mogibacterium diversum	c__Clostridia
s__Blautia_A sp900066145	c__Clostridia
s__Eubacterium_R sp000434995	c__Clostridia
s__ER4 sp002437735	c__Clostridia
s__Anaerotruncus colihominis	c__Clostridia
s__CAG-177 sp002438685	c__Clostridia
s__Anaerovibrio sp934203205	c__Clostridia
s__Paraclostridium sordellii	c__Clostridia
s__Eubacterium_G sp000435815	c__Clostridia
s__Sarcina perfringens	c__Clostridia
s__Faecousia sp934589705	c__Clostridia
s__CAG-269 sp000431335	c__Clostridia
s__Lachnospira eligens_A	c__Clostridia
s__Intestinimonas butyriciproducens	c__Clostridia
s__HGM12814 sp934454005	c__Clostridia
s__Agathobacter sp000434275	c__Clostridia
s__CAG-115 sp003507295	c__Clostridia
s__Faecalibacterium sp934525735	c__Clostridia
s__UBA4951 sp900540385	c__Clostridia
s__UBA10281 sp000437515	c__Clostridia
s__Faecousia sp018918045	c__Clostridia
s__Acetatifactor sp934394815	c__Clostridia
s__Holdemanella porci_A	c__Clostridia
s__Blautia_A sp900066205	c__Clostridia
s__Agathobacter sp900548765	c__Clostridia
s__Faecalibacterium prausnitzii_J	c__Clostridia
s__Clostridium sp900759995	c__Clostridia
s__CAG-449 sp900551385	c__Clostridia
s__Acetatifactor sp900766575	c__Clostridia
s__Fimicola cottocaccae	c__Clostridia
s__Coprococcus eutactus	c__Clostridia
s__Vescimonas sp003539495	c__Clostridia
s__Blautia_A sp900066335	c__Clostridia
s__Roseburia sp003470905	c__Clostridia
s__Aphodocola sp900772415	c__Clostridia
s__f__CAG-274__47680_3#24_clean_bin.21.permissive_cleaned	c__Clostridia
s__Weizmannia coagulans	c__Clostridia
s__Mitsuokella jalaludinii	c__Clostridia
s__Faecalibacterium sp934524985	c__Clostridia
s__Lachnoclostridium_B faecipullorum	c__Clostridia
s__Phascolarctobacterium_A sp022718015	c__Clostridia
s__Gemmiger sp900540775	c__Clostridia
s__1XD42-69 sp014287635	c__Clostridia
s__Hungatella effluvii	c__Clostridia
s__Clostridium_Q symbiosum	c__Clostridia
s__Gemmiger sp934502625	c__Clostridia
s__Agathobacter sp900550545	c__Clostridia
s__Megamonas hypermegale_A	c__Clostridia
s__Eubacterium_G ventriosum	c__Clostridia
s__Ventricola sp900542395	c__Clostridia
s__Anaerotignum sp905212195	c__Clostridia
s__UBA10281 sp900554485	c__Clostridia
s__CAG-273 sp003534295	c__Clostridia
s__CAG-269 sp934149155	c__Clostridia
s__Eubacterium_R sp934561735	c__Clostridia
s__Lachnospira sp900316325	c__Clostridia
s__CAG-115 sp934457235	c__Clostridia
s__CAG-492 sp000434335	c__Clostridia
s__HGM13006 sp900756575	c__Clostridia
s__Peptostreptococcus anaerobius	c__Clostridia
s__CAG-245 sp000435175	c__Clostridia
s__RUG131 sp900549975	c__Clostridia
s__Wujia chipingensis	c__Clostridia
s__Schaedlerella sp900066545	c__Clostridia
s__Acidaminococcus provencensis	c__Clostridia
s__Limiplasma sp900548145	c__Clostridia
s__CAG-103 sp900317855	c__Clostridia
s__Faecalicoccus pleomorphus	c__Clostridia
s__CAJOJO01 sp014845975	c__Clostridia
s__Selenomonas_A sp900769615	c__Clostridia
s__CAG-170 sp934613505	c__Clostridia
s__Blautia_A sp934426285	c__Clostridia
s__Ventrenecus sp934085675	c__Clostridia
s__Turicibacter bilis	c__Clostridia
s__VUNA01 sp002299625	c__Clostridia
s__Vescimonas sp900545585	c__Clostridia
s__UBA737 sp900549055	c__Clostridia
s__Faecalimonas umbilicata	c__Clostridia
s__UBA3402 sp934418055	c__Clostridia
s__Dysosmobacter sp900544615	c__Clostridia
s__Choladocola sp003481535	c__Clostridia
s__CAG-266 sp000436095	c__Clostridia
s__Dorea_A longicatena	c__Clostridia
s__CAG-170 sp934646185	c__Clostridia
s__Fusicatenibacter sp900772675	c__Clostridia
s__Ventrimonas sp003478505	c__Clostridia
s__UMGS902 sp934467415	c__Clostridia
s__Anaerosporobacter sp019421365	c__Clostridia
s__Faecalibacterium prausnitzii_E	c__Clostridia
s__Coprococcus_A catus	c__Clostridia
s__CAG-568 sp000434395	c__Clostridia
s__ER4 sp934636865	c__Clostridia
s__UBA10281 sp934271735	c__Clostridia
s__CAG-41 sp900066215	c__Clostridia
s__CAG-269 sp900552555	c__Clostridia
s__Anaerococcus sp900550345	c__Clostridia
s__Faecalitalea cylindroides	c__Clostridia
s__Eubacterium_I ramulus_A	c__Clostridia
s__Faecalibacterium prausnitzii_D	c__Clostridia
s__CAG-488 sp000434055	c__Clostridia
s__CAG-605 sp934101445	c__Clostridia
s__Scatovivens sp934140005	c__Clostridia
s__CAG-793 sp000433915	c__Clostridia
s__Faecalibacterium sp900758465	c__Clostridia
s__Anaerococcus vaginalis	c__Clostridia
s__Holdemanella biformis	c__Clostridia
s__CAG-95 sp000438155	c__Clostridia
s__Lawsonibacter sp014287875	c__Clostridia
s__Lachnospira sp003451515	c__Clostridia
s__Mediterraneibacter_A butyricigenes	c__Clostridia
s__CAG-269 sp001916055	c__Clostridia
s__Phascolarctobacterium sp900551745	c__Clostridia
s__RUG11198 sp934140355	c__Clostridia
s__CAG-353 sp900768995	c__Clostridia
s__CAG-269 sp934148985	c__Clostridia
s__Catenibacterium sp000437715	c__Clostridia
s__CAG-353 sp945867875	c__Clostridia
s__Faecalibacterium sp934511465	c__Clostridia
s__Blautia coccoides	c__Clostridia
s__Eubacterium callanderi	c__Clostridia
s__Vescimonas sp900548615	c__Clostridia
s__Roseburia sp900756925	c__Clostridia
s__UMGS1795 sp900555125	c__Clostridia
s__CAG-170 sp000432135	c__Clostridia
s__Eubacterium_R sp900542875	c__Clostridia
s__Agathobacter faecis	c__Clostridia
s__Ruminococcus_E sp003438075	c__Clostridia
s__Faecousia sp900546415	c__Clostridia
s__Eubacterium_G sp900764695	c__Clostridia
s__Hominisplanchenecus faecis	c__Clostridia
s__Bariatricus sp934320645	c__Clostridia
s__Allisonella pneumosinta	c__Clostridia
s__CAG-269 sp900556345	c__Clostridia
s__Eubacterium_F sp934316845	c__Clostridia
s__Phil1 sp001940855	c__Clostridia
s__CAG-882 sp003486385	c__Clostridia
s__Luxibacter massiliensis	c__Clostridia
s__UBA4716 sp900556575	c__Clostridia
s__CAG-115 sp000432175	c__Clostridia
s__Eubacterium_G sp000434315	c__Clostridia
s__Faecalibacterium sp934525325	c__Clostridia
s__Blautia_A sp900548245	c__Clostridia
s__Lachnospira sp900551945	c__Clostridia
s__Roseburia_A porci	c__Clostridia
s__Ventrenecus sp900549625	c__Clostridia
s__ER4 sp900552015	c__Clostridia
s__Clostridium sp000435835	c__Clostridia
s__Fusicatenibacter saccharivorans	c__Clostridia
s__Vescimonas sp000435555	c__Clostridia
s__Onthomonas sp934565425	c__Clostridia
s__CAG-269 sp934130975	c__Clostridia
s__Lachnoclostridium_B sp900066555	c__Clostridia
s__CAG-95 sp000436115	c__Clostridia
s__Vescimonas coprocola	c__Clostridia
s__Fimimonas sp003537755	c__Clostridia
s__UMGS2037 sp934371505	c__Clostridia
s__Anaerostipes hadrus	c__Clostridia
s__Pseudoflavonifractor_A gallinarum	c__Clostridia
s__ER4 sp000765235	c__Clostridia
s__Mediterraneibacter faecavium	c__Clostridia
s__Lentihominibacter sp934281605	c__Clostridia
s__UBA10281 sp900767815	c__Clostridia
s__Ventrimonas sp900770535	c__Clostridia
s__Faecalibacterium sp934525405	c__Clostridia
s__CAG-269 sp934120675	c__Clostridia
s__Butyrivibrio_A crossotus	c__Clostridia
s__Coprococcus sp900557435	c__Clostridia
s__Dysosmobacter sp900542115	c__Clostridia
s__Clostridium_AQ innocuum	c__Clostridia
s__Blautia_A sp900066505	c__Clostridia
s__UMGS1663 sp934133165	c__Clostridia
s__Roseburia sp900550935	c__Clostridia
s__CAG-103 sp000432375	c__Clostridia
s__Ruminococcus_E sp003526955	c__Clostridia
s__Sarcina ventriculi	c__Clostridia
s__Anaerococcus vaginalis_C	c__Clostridia
s__Lawsonibacter sp900066825	c__Clostridia
s__Mediterraneibacter vanvlietii	c__Clostridia
s__Holdemanella sp900754615	c__Clostridia
s__Faecalibacterium duncaniae	c__Clostridia
s__Vescimonas fastidiosa	c__Clostridia
s__Blautia_A sp900751995	c__Clostridia
s__Blautia_A luti	c__Clostridia
s__ER4 sp900317525	c__Clostridia
s__Faecalibacterium prausnitzii_I	c__Clostridia
s__CAG-217 sp000436335	c__Clostridia
s__Faecousia sp000434635	c__Clostridia
s__Blautia_A sp003471165	c__Clostridia
s__CAG-449 sp905204225	c__Clostridia
s__UBA1206 sp000433115	c__Clostridia
s__Faecalibacterium sp014858325	c__Clostridia
s__Bacteroides_F pectinophilus	c__Clostridia
s__UBA1417 sp003531055	c__Clostridia
s__UMGS1781 sp900553695	c__Clostridia
s__Pararoseburia lenta	c__Clostridia
s__Lachnospira rogosae	c__Clostridia
s__Anaerostipes sp019423795	c__Clostridia
s__Roseburia sp019411365	c__Clostridia
s__UMGS1820 sp905201285	c__Clostridia
s__UMGS363 sp900550695	c__Clostridia
s__Finegoldia magna_F	c__Clostridia
s__UBA1417 sp934643185	c__Clostridia
s__Enterocloster sp000431375	c__Clostridia
s__Oribacterium sp900770445	c__Clostridia
s__Faecousia sp900544945	c__Clostridia
s__Enterocloster clostridioformis_A	c__Clostridia
s__Evtepia excrementipullorum	c__Clostridia
s__Lentihominibacter faecis	c__Clostridia
s__CAG-433 sp019423565	c__Clostridia
s__Eisenbergiella tayi	c__Clostridia
s__Marvinbryantia sp900066075	c__Clostridia
s__SFMI01 sp004556155	c__Clostridia
s__Acetatifactor sp003447295	c__Clostridia
s__14-2 sp012519695	c__Clostridia
s__Hominisplanchenecus sp900551235	c__Clostridia
s__UMGS1071 sp934454125	c__Clostridia
s__Faecalibacterium sp934526125	c__Clostridia
s__Faecalibacillus sp003480255	c__Clostridia
s__Mediterraneibacter faecis	c__Clostridia
s__Clostridium paraputrificum	c__Clostridia
s__CAG-170 sp902796245	c__Clostridia
s__Metalachnospira sp900553995	c__Clostridia
s__Holdemanella sp003436425	c__Clostridia
s__CAG-302 sp934101345	c__Clostridia
s__Intestinibacter bartlettii	c__Clostridia
s__Vescimonas sp934565655	c__Clostridia
s__UMGS1498 sp900552335	c__Clostridia
s__Avilachnospira sp944377405	c__Clostridia
s__CAG-269 sp000435535	c__Clostridia
s__Blautia_A sp934372025	c__Clostridia
s__CAG-303 sp000437755	c__Clostridia
s__Blautia sp001304935	c__Clostridia
s__Oribacterium sp004554245	c__Clostridia
s__Holdemanella sp934754935	c__Clostridia
s__Phascolarctobacterium faecium	c__Clostridia
s__UBA1259 sp905210545	c__Clostridia
s__Baileyella intestinalis	c__Clostridia
s__Ruminiclostridium_E sp900539195	c__Clostridia
s__Vescimonas sp900547745	c__Clostridia
s__Lawsonibacter sp900550705	c__Clostridia
s__Gemmiger sp900556255	c__Clostridia
s__Ventricola sp900548125	c__Clostridia
s__Enterocloster clostridioformis	c__Clostridia
s__UMGS1668 sp900553955	c__Clostridia
s__CAG-269 sp000438255	c__Clostridia
s__Anaerotignum sp905214825	c__Clostridia
s__Staphylococcus aureus	c__Clostridia
s__Butyribacter sp000436755	c__Clostridia
s__Flavonifractor plautii	c__Clostridia
s__Ruminococcus_C sp900545285	c__Clostridia
s__CAG-238 sp900542245	c__Clostridia
s__URXU01 sp900545025	c__Clostridia
s__UBA2821 sp902763335	c__Clostridia
s__Vescimonas sp900552475	c__Clostridia
s__Faecalibacterium sp934540955	c__Clostridia
s__Lawsonibacter sp900549405	c__Clostridia
s__Angelakisella sp900547385	c__Clostridia
s__Faecalibacterium sp934525845	c__Clostridia
s__Eubacterium_R sp900772705	c__Clostridia
s__Clostridium_AP scindens	c__Clostridia
s__UMGS1387 sp900551295	c__Clostridia
s__Clostridium sp001916075	c__Clostridia
s__g__Copromonas__40054_2#165_bin.15.strict_clean	c__Clostridia
s__Faecalibacterium prausnitzii	c__Clostridia
s__CAG-605 sp900545005	c__Clostridia
s__Blautia stercoravium	c__Clostridia
s__Enterocloster sp900538485	c__Clostridia
s__Agathobacter sp934359755	c__Clostridia
s__Mediterraneibacter excrementipullorum	c__Clostridia
s__CAG-302 sp000431795	c__Clostridia
s__Blautia_A sp905209435	c__Clostridia
s__CAG-411 sp000437275	c__Clostridia
s__CAG-841 sp900544285	c__Clostridia
s__Faecousia sp900762935	c__Clostridia
s__Oliverpabstia sp934359255	c__Clostridia
s__CAG-269 sp934122385	c__Clostridia
s__Weizmannia ginsengihumi	c__Clostridia
s__Gemmiger qucibialis	c__Clostridia
s__Lachnospira eligens	c__Clostridia
s__Butyricicoccus pullicaecorum	c__Clostridia
s__Gemmiger sp900539695	c__Clostridia
s__Coprococcus sp900767685	c__Clostridia
s__Massilimicrobiota merdigallinarum	c__Clostridia
s__Muricomes sp000509105	c__Clostridia
s__UBA6448 sp934096985	c__Clostridia
s__UBA1259 sp003523255	c__Clostridia
s__CAG-103 sp934591895	c__Clostridia
s__Coprococcus eutactus_A	c__Clostridia
s__Clostridium sp018372875	c__Clostridia
s__CAG-245 sp934122035	c__Clostridia
s__UBA3282 sp934418125	c__Clostridia
s__Vescimonas sp900550615	c__Clostridia
s__Fimadaptatus sp900553645	c__Clostridia
s__Ruminococcus_E bromii	c__Clostridia
s__Pararoseburia sp900546435	c__Clostridia
s__Faecousia sp900544405	c__Clostridia
s__UBA10281 sp900767885	c__Clostridia
s__Agathobacter sp900546625	c__Clostridia
s__Negativibacillus massiliensis	c__Clostridia
s__Roseburia sp934317215	c__Clostridia
s__KLE1615 sp900066985	c__Clostridia
s__SFJ001 sp004555865	c__Clostridia
s__Wujia sp900539705	c__Clostridia
s__Anaeroplasma sp934229785	c__Clostridia
s__Peptoniphilus_A harei_A	c__Clostridia
s__CAG-177 sp002451755	c__Clostridia
s__Mitsuokella multacida	c__Clostridia
s__UMGS1663 sp934153805	c__Clostridia
s__Lachnospira sp900545725	c__Clostridia
s__Ruminococcus_C sp000437175	c__Clostridia
s__Onthovivens sp900545015	c__Clostridia
s__CAG-115 sp003531585	c__Clostridia
s__Vescimonas sp003487665	c__Clostridia
s__Absicoccus sp000434355	c__Clostridia
s__Ventrenecus sp934101275	c__Clostridia
s__F23-B02 sp004553495	c__Clostridia
s__CAG-448 sp003150135	c__Clostridia
s__UBA3402 sp003478355	c__Clostridia
s__Lentihominibacter sp905193765	c__Clostridia
s__CAG-274 sp900545305	c__Clostridia
s__CAG-269 sp934120045	c__Clostridia
s__Vescimonas sp900554275	c__Clostridia
s__UMGS363 sp900541495	c__Clostridia
s__Phascolarctobacterium_A sp934234275	c__Clostridia
s__Acidaminococcus sp905215645	c__Clostridia
s__Faecousia sp900547405	c__Clostridia
s__Ruminococcus sp900540005	c__Clostridia
s__Lachnospira sp019424245	c__Clostridia
s__Agathobacter rectalis	c__Clostridia
s__CAG-605 sp934102255	c__Clostridia
s__UBA7597 sp002474405	c__Clostridia
s__Blautia_A sp003474435	c__Clostridia
s__UBA10677 sp900762945	c__Clostridia
s__UBA10281 sp021635425	c__Clostridia
s__Fimenecus sp004556705	c__Clostridia
s__Faecousia sp900546075	c__Clostridia
s__Roseburia sp003483745	c__Clostridia
s__Ruminococcus_C sp000437255	c__Clostridia
s__PeH17 sp000435055	c__Clostridia
s__Faecalibacterium sp934548045	c__Clostridia
s__Gemmiger variabilis_B	c__Clostridia
s__Faecalimonas phoceensis	c__Clostridia
s__Mediterraneibacter lactaris	c__Clostridia
s__CAG-605 sp934096535	c__Clostridia
s__UMGS902 sp003343845	c__Clostridia
s__CAG-841 sp000437375	c__Clostridia
s__Clostridium_Q fessum	c__Clostridia
s__Aphodocola sp000434835	c__Clostridia
s__Lentihominibacter sp900066305	c__Clostridia
s__UBA3789 sp934140575	c__Clostridia
s__UBA3375 sp900551955	c__Clostridia
s__Gemmiger sp900554145	c__Clostridia
s__Butyribacter huaianensis	c__Clostridia
s__UBA7597 sp900542935	c__Clostridia
s__Peptoniphilus_A gorbachii	c__Clostridia
s__Peptacetobacter hiranonis	c__Clostridia
s__Clostridium cuniculi	c__Clostridia
s__Mediterraneibacter sp934309415	c__Clostridia
s__Finegoldia magna	c__Clostridia
s__UMGS1994 sp934130285	c__Clostridia
s__Dorea_A sp900550865	c__Clostridia
s__Ruminococcus_D bicirculans	c__Clostridia
s__Mediterraneibacter sp934309345	c__Clostridia
s__Eisenbergiella sp900066775	c__Clostridia
s__Merdisoma sp934373375	c__Clostridia
s__Clostridium_AQ sp003481775	c__Clostridia
s__HGM11416 sp900766495	c__Clostridia
s__Faecalibacterium sp934561555	c__Clostridia
s__Wujia sp022174665	c__Clostridia
s__UMGS1889 sp900556055	c__Clostridia
s__CAKSFT01 sp934444735	c__Clostridia
s__Copromonas sp900066785	c__Clostridia
s__CAG-269 sp934122085	c__Clostridia
s__Blautia_A sp934437695	c__Clostridia
s__RGIG8748 sp934500705	c__Clostridia
s__Catenibacterium sp900540665	c__Clostridia
s__Eubacterium_R sp900539165	c__Clostridia
s__Roseburia sp900542495	c__Clostridia
s__Blautia_A wexlerae_B	c__Clostridia
s__Onthousia sp934148995	c__Clostridia
s__Faecalibacterium sp900772565	c__Clostridia
s__SFEL01 sp004557245	c__Clostridia
s__CAG-269 sp905213875	c__Clostridia
s__Choladocola sp018223365	c__Clostridia
s__UMGS1338 sp900550805	c__Clostridia
s__Limivicinus sp900547315	c__Clostridia
s__CAG-269 sp900553985	c__Clostridia
s__Dorea_A sp934294775	c__Clostridia
s__Ruminococcus_C sp000980705	c__Clostridia
s__CAG-274 sp000432155	c__Clostridia
s__SFIE01 sp004555405	c__Clostridia
s__Eubacterium_I sp900546495	c__Clostridia
s__Coprococcus sp900066115	c__Clostridia
s__Eubacterium_R sp000433975	c__Clostridia
s__Mediterraneibacter torques	c__Clostridia
s__CAG-307 sp900547045	c__Clostridia
s__Copromonas sp900066535	c__Clostridia
s__Megamonas sp900556715	c__Clostridia
s__Anaerococcus vaginalis_B	c__Clostridia
s__Faecousia sp900752285	c__Clostridia
s__Terrisporobacter sp900557165	c__Clostridia
s__Oliverpabstia faecicola	c__Clostridia
s__Lachnoclostridium_B monacensis	c__Clostridia
s__Merdibacter merdigallinarum	c__Clostridia
s__Eubacterium_R sp900539325	c__Clostridia
s__UMGS973 sp900547295	c__Clostridia
s__RUG131 sp934162685	c__Clostridia
s__Anaerococcus obesiensis	c__Clostridia
s__Ruminococcus sp002438605	c__Clostridia
s__Angelakisella sp004557855	c__Clostridia
s__UBA10281 sp900767495	c__Clostridia
s__Eubacterium_R sp934525195	c__Clostridia
s__Vescimonas sp900545495	c__Clostridia
s__CAG-465 sp000433755	c__Clostridia
s__Anaerostipes sp018918155	c__Clostridia
s__Bariatricus comes_A	c__Clostridia
s__Ruminiclostridium_E sp934462775	c__Clostridia
s__Merdimonas faecis	c__Clostridia
s__Intestinibacter sp900540355	c__Clostridia
s__Eubacterium limosum	c__Clostridia
s__Roseburia hominis	c__Clostridia
s__Hominisplanchenecus sp905214675	c__Clostridia
s__Ruminococcus_B gnavus	c__Clostridia
s__CAG-302 sp934182615	c__Clostridia
s__Faecalibacterium sp934512105	c__Clostridia
s__Staphylococcus epidermidis	c__Clostridia
s__Eubacterium_F sp934322085	c__Clostridia
s__Faecalibacterium sp934561115	c__Clostridia
s__Clostridioides difficile	c__Clostridia
s__Limivicinus sp934573855	c__Clostridia
s__Peptoniphilus_A senegalensis	c__Clostridia
s__CAG-475 sp900550915	c__Clostridia
s__CAG-245 sp000434195	c__Clostridia
s__Catenibacterium sp900764565	c__Clostridia
s__Peptoniphilus_A harei	c__Clostridia
s__Staphylococcus hominis	c__Clostridia
s__CAG-724 sp905202255	c__Clostridia
s__Eubacterium_F sp900539115	c__Clostridia
s__Peptacetobacter sp900539645	c__Clostridia
s__Eubacterium_I sp934358495	c__Clostridia
s__Blautia_A sp003477525	c__Clostridia
s__Merdisoma sp900553635	c__Clostridia
s__CAG-475 sp000434435	c__Clostridia
s__URXU01 sp900541915	c__Clostridia
s__Blautia_A sp900120195	c__Clostridia
s__Dorea formicigenerans	c__Clostridia
s__Enterocloster aldenensis	c__Clostridia
s__CAG-605 sp934101745	c__Clostridia
s__Copromonas sp934370915	c__Clostridia
s__Clostridium butyricum	c__Clostridia
s__Ventrenecus sp905205665	c__Clostridia
s__Eubacterium_F sp003491505	c__Clostridia
s__Ruminococcus_C callidus	c__Clostridia
s__CAG-103 sp900543625	c__Clostridia
s__Dysosmobacter faecalis	c__Clostridia
s__Agathobaculum butyriciproducens	c__Clostridia
s__KLE1615 sp934292725	c__Clostridia
s__Acetatifactor intestinalis	c__Clostridia
s__Choladousia sp902363665	c__Clostridia
s__Lacrimispora sp000526575	c__Clostridia
s__Evtepia sp004556345	c__Clostridia
s__Megamonas funiformis	c__Clostridia
s__CAG-269 sp934132805	c__Clostridia
s__CAG-269 sp934162615	c__Clostridia
s__Blautia_A massiliensis	c__Clostridia
s__Clostridium sp900539375	c__Clostridia
s__Eubacterium_I ramulus	c__Clostridia
s__Faecalibacterium sp900539885	c__Clostridia
s__Agathobaculum sp900544475	c__Clostridia
s__Ruminococcus_E sp934476515	c__Clostridia
s__UMGS1279 sp900550315	c__Clostridia
s__UMGS1338 sp934465535	c__Clostridia
s__Clostridium sp900769625	c__Clostridia
s__Agathobacter sp900317585	c__Clostridia
s__CAG-605 sp000433255	c__Clostridia
s__Acetatifactor sp934394515	c__Clostridia
s__Limivivens sp900543575	c__Clostridia
s__Blautia_A sp934424575	c__Clostridia
s__Blautia_A faecis	c__Clostridia
s__Phascolarctobacterium_A succinatutens_A	c__Clostridia
s__Vescimonas sp934591815	c__Clostridia
s__Pseudoruminococcus massiliensis	c__Clostridia
s__Phascolarctobacterium_A succinatutens	c__Clostridia
s__CAG-288 sp000437395	c__Clostridia
s__Fimenecus sp934436505	c__Clostridia
s__CAG-269 sp900553125	c__Clostridia
s__Faecalibacterium sp934501115	c__Clostridia
s__Schaedlerella sp934435195	c__Clostridia
s__Eubacterium_I sp900557275	c__Clostridia
s__UMGS1820 sp900555375	c__Clostridia
s__CAG-245 sp900552135	c__Clostridia
s__Copromonas sp900066055	c__Clostridia
s__Blautia_A sp900066355	c__Clostridia
s__CAG-390 sp000437015	c__Clostridia
s__CAG-245 sp900761475	c__Clostridia
s__Scatovivens sp934141445	c__Clostridia
s__Phascolarctobacterium_A sp934190775	c__Clostridia
s__Metalachnospira sp902406135	c__Clostridia
s__Holdemanella porci	c__Clostridia
s__CAG-269 sp001916065	c__Clostridia
s__Clostridium saudiense	c__Clostridia
s__Faecousia sp934630985	c__Clostridia
s__Gemmiger sp934561205	c__Clostridia
s__Coprococcus_A catus_A	c__Clostridia
s__CAG-269 sp934184665	c__Clostridia
s__UBA1081 sp900543395	c__Clostridia
s__CAG-302 sp934096105	c__Clostridia
s__Clostridioides_A sp002390935	c__Clostridia
s__Blautia_A schinkii	c__Clostridia
s__Agathobacter sp900552085	c__Clostridia
s__VUNA01 sp934234035	c__Clostridia
s__CAG-417 sp000432835	c__Clostridia
s__CAG-103 sp900757655	c__Clostridia
s__Faecousia sp934589525	c__Clostridia
s__CAG-170 sp905214155	c__Clostridia
s__Clostridium sp900540255	c__Clostridia
s__Bariatricus comes	c__Clostridia
s__UBA1740 sp900767415	c__Clostridia
s__CAG-170 sp000436735	c__Clostridia
s__Faecousia sp900549705	c__Clostridia
s__Roseburia_A sp934364805	c__Clostridia
s__Acidaminococcus massiliensis	c__Clostridia
s__Blautia stercoris	c__Clostridia
s__UBA737 sp900549755	c__Clostridia
s__Catenibacterium sp900540685	c__Clostridia
s__RUG472 sp900545265	c__Clostridia
s__CAG-390 sp900753295	c__Clostridia
s__g__Anaerostipes__38353_3#32_bin.13.permissive_clean	c__Clostridia
s__Faecalimonas sp000209385	c__Clostridia
s__UMGS1820 sp900545865	c__Clostridia
s__Acidaminococcus intestini	c__Clostridia
s__Faecalibacterium sp934539245	c__Clostridia
s__Butyribacter sp003524945	c__Clostridia
s__Enterocloster asparagiformis	c__Clostridia
s__Bulleidia sp934757945	c__Clostridia
s__VUNA01 sp016775335	c__Clostridia
s__Faecalibacterium sp900539945	c__Clostridia
s__Gemmiger formicilis	c__Clostridia
s__UBA7597 sp003448195	c__Clostridia
s__UMGS995 sp934130175	c__Clostridia
s__CAG-177 sp003538135	c__Clostridia
s__CAG-605 sp934098565	c__Clostridia
s__CAG-95 sp900066375	c__Clostridia
s__UBA10677 sp003533505	c__Clostridia
s__g__RUG11200__38353_3#25_bin.6.permissive_clean	c__Clostridia
s__Eubacterium_R sp000436835	c__Clostridia
s__Coprobacillus cateniformis	c__Clostridia
s__CAG-882 sp934351925	c__Clostridia
s__Lawsonibacter sp900545895	c__Clostridia
s__RGIG4076 sp905198155	c__Clostridia
s__CAG-170 sp900553545	c__Clostridia
s__UMGS1449 sp934102055	c__Clostridia
s__Limivicinus sp934572335	c__Clostridia
s__Eubacterium_R coprostanoligenes	c__Clostridia
s__UBA737 sp900543215	c__Clostridia
s__Scybalousia sp900542735	c__Clostridia
s__Ruminococcus_E sp905215855	c__Clostridia
s__CAG-510 sp000434615	c__Clostridia
s__RUG806 sp900313475	c__Clostridia
s__Faecalibacterium sp934553285	c__Clostridia
s__Faecalibacterium prausnitzii_F	c__Clostridia
s__Anaerotignum faecicola	c__Clostridia
s__Clostridium_Q saccharolyticum_A	c__Clostridia
s__Anaerobutyricum sp934317185	c__Clostridia
s__Vescimonas sp001916855	c__Clostridia
s__CAG-628 sp000438415	c__Clostridia
s__Enterocloster sp900541315	c__Clostridia
s__Onthomonas sp934597165	c__Clostridia
s__CAG-307 sp001916215	c__Clostridia
s__Roseburia inulinivorans	c__Clostridia
s__CAG-533 sp900553855	c__Clostridia
s__Tyzzerella sp018371275	c__Clostridia
s__Butyricicoccus sp900604335	c__Clostridia
s__CAG-269 sp900551615	c__Clostridia
s__Clostridium neonatale	c__Clostridia
s__CAG-605 sp000433475	c__Clostridia
s__Ruminococcus sp934481385	c__Clostridia
s__Eubacterium_R sp900539775	c__Clostridia
s__Lachnospira sp000436475	c__Clostridia
s__Pseudobutyricicoccus sp003477405	c__Clostridia
s__Megamonas gallistercoris	c__Clostridia
s__Clostridium sp934754925	c__Clostridia
s__Faecalibacillus intestinalis	c__Clostridia
s__Ureaplasma sp900544585	c__Clostridia
s__Butyribacter hominis	c__Clostridia
s__Butyricicoccus_A intestinisimiae	c__Clostridia
s__CAG-433 sp000433675	c__Clostridia
s__Sellimonas intestinalis	c__Clostridia
s__SFJ001 sp934513685	c__Clostridia
s__Faecalibacillus faecis	c__Clostridia
s__Peptococcus niger	c__Clostridia
s__CAG-345 sp000433315	c__Clostridia
s__CAG-302 sp934162325	c__Clostridia
s__Dysosmobacter sp001916835	c__Clostridia
s__Marvinbryantia sp934408725	c__Clostridia
s__Clostridium sp018372555	c__Clostridia
s__Acidaminococcus sp000437815	c__Clostridia
s__Clostridium_J culturomicium	c__Clostridia
s__Thomasclavelia sp000508865	c__Clostridia
s__CAG-245 sp934131055	c__Clostridia
s__Evtepia gabavorous	c__Clostridia
s__Roseburia sp905206195	c__Clostridia
s__UBA11774 sp003507655	c__Clostridia
s__UMGS995 sp900769695	c__Clostridia
s__Anaerobutyricum soehngenii	c__Clostridia
s__Faecalibacterium hattorii	c__Clostridia
s__Ruthenibacterium lactatiformans	c__Clostridia
s__Holdemanella sp003458715	c__Clostridia
s__Faecalibacterium sp900765705	c__Clostridia
s__CAG-465 sp905204915	c__Clostridia
s__UMGS1071 sp900542375	c__Clostridia
s__Vescimonas sp900556015	c__Clostridia
s__UBA4285 sp900545225	c__Clostridia
s__Dysosmobacter sp900763685	c__Clostridia
s__Anaerostipes rhamnosivorans	c__Clostridia
s__Eubacterium_G sp000432355	c__Clostridia
s__UBA11524 sp000437595	c__Clostridia
s__Ruminococcus_E bovis	c__Clostridia
s__Agathobacter sp934307695	c__Clostridia
s__Fimenecus sp000432435	c__Clostridia
s__CAG-349 sp003539515	c__Clostridia
s__UBA1394 sp900554975	c__Clostridia
s__CAG-877 sp900768815	c__Clostridia
s__Acetatifactor sp900066565	c__Clostridia
s__Faecalibacterium sp900765105	c__Clostridia
s__Dysosmobacter sp004553545	c__Clostridia
s__CAG-964 sp000435335	c__Clostridia
s__Roseburia sp900548205	c__Clostridia
s__Vescimonas sp002438575	c__Clostridia
s__Vescimonas sp900555735	c__Clostridia
s__Blautia_A intestinalis	c__Clostridia
s__CAG-605 sp934098505	c__Clostridia
s__Blautia_A wexlerae	c__Clostridia
s__CAG-303 sp900539455	c__Clostridia
s__Flemingibacterium sp900546315	c__Clostridia
s__Phascolarctobacterium_A sp900753045	c__Clostridia
s__CAG-170 sp900549635	c__Clostridia
s__UBA3789 sp900543055	c__Clostridia
s__CAG-353 sp900066885	c__Clostridia
s__Aphodocola sp900547225	c__Clostridia
s__Phascolarctobacterium sp900545535	c__Clostridia
s__COE1 sp001916965	c__Clostridia
s__Acetatifactor sp900760705	c__Clostridia
s__Eubacterium_R sp900548085	c__Clostridia
s__Ruminiclostridium_E siraeum	c__Clostridia
s__Gemmiger sp900540595	c__Clostridia
s__Butyribacter intestini	c__Clostridia
s__Limivivens sp905214955	c__Clostridia
s__Faecalibacterium prausnitzii_A	c__Clostridia
s__Thomasclavelia ramosa	c__Clostridia
s__Ruminococcus_C sp000433635	c__Clostridia
s__Faecalibacterium sp934503275	c__Clostridia
s__Ruminococcus_F champanellensis	c__Clostridia
s__Collinsella sp934630375	p__Actinomycetota
s__Collinsella sp019425005	p__Actinomycetota
s__Bifidobacterium angulatum	p__Actinomycetota
s__g__Collinsella__40054_2#62_bin.14.orig_clean	p__Actinomycetota
s__g__Collinsella__38222_8#8_bin.7.permissive_clean	p__Actinomycetota
s__Collinsella sp905210085	p__Actinomycetota
s__Paratractidigestivibacter sp934660915	p__Actinomycetota
s__Bifidobacterium adolescentis	p__Actinomycetota
s__Collinsella sp934630385	p__Actinomycetota
s__Collinsella sp018368345	p__Actinomycetota
s__Collinsella sp900541725	p__Actinomycetota
s__Pauljensenia sp000278725	p__Actinomycetota
s__Collinsella sp023441725	p__Actinomycetota
s__Collinsella sp900757705	p__Actinomycetota
s__Collinsella sp900545075	p__Actinomycetota
s__Collinsella sp900549355	p__Actinomycetota
s__Collinsella sp900547025	p__Actinomycetota
s__Corynebacterium flavescens	p__Actinomycetota
s__Collinsella sp900545615	p__Actinomycetota
s__UBA6984 sp900550295	p__Actinomycetota
s__Collinsella aerofaciens_T	p__Actinomycetota
s__Collinsella sp934654835	p__Actinomycetota
s__Collinsella sp900542325	p__Actinomycetota
s__Collinsella sp900552395	p__Actinomycetota
s__Parolsenella sp900549525	p__Actinomycetota
s__Collinsella sp900541475	p__Actinomycetota
s__Collinsella sp900758375	p__Actinomycetota
s__Bifidobacterium infantis	p__Actinomycetota
s__Collinsella sp934650095	p__Actinomycetota
s__Collinsella sp900552755	p__Actinomycetota
s__Collinsella sp019414025	p__Actinomycetota
s__Stercorousia sp900556295	p__Actinomycetota
s__Collinsella aerofaciens_AI	p__Actinomycetota
s__Collinsella sp900755005	p__Actinomycetota
s__Collinsella aerofaciens_E	p__Actinomycetota
s__Collinsella sp003439125	p__Actinomycetota
s__Collinsella sp003436275	p__Actinomycetota
s__Bifidobacterium animalis	p__Actinomycetota
s__Collinsella sp003470665	p__Actinomycetota
s__Collinsella sp018382295	p__Actinomycetota
s__Collinsella aerofaciens_AE	p__Actinomycetota
s__Collinsella sp900756945	p__Actinomycetota
s__Collinsella sp905215445	p__Actinomycetota
s__UMGS1585 sp900553205	p__Actinomycetota
s__Cutibacterium avidum	p__Actinomycetota
s__Collinsella sp934654585	p__Actinomycetota
s__Collinsella sp934655755	p__Actinomycetota
s__Collinsella sp003438495	p__Actinomycetota
s__Collinsella sp900754075	p__Actinomycetota
s__Collinsella sp900758845	p__Actinomycetota
s__CAG-196 sp934747325	p__Actinomycetota
s__Collinsella sp900544725	p__Actinomycetota
s__Collinsella sp900760215	p__Actinomycetota
s__Pauljensenia sp000411415	p__Actinomycetota
s__Collinsella sp900548815	p__Actinomycetota
s__g__Collinsella__47542_1#126_clean_bin.1.orig_cleaned	p__Actinomycetota
s__Collinsella sp900556675	p__Actinomycetota
s__Collinsella sp900542125	p__Actinomycetota
s__Collinsella sp900541035	p__Actinomycetota
s__Collinsella sp900544875	p__Actinomycetota
s__Collinsella sp000763055	p__Actinomycetota
s__Collinsella sp023708985	p__Actinomycetota
s__Collinsella sp019414565	p__Actinomycetota
s__Collinsella sp934646865	p__Actinomycetota
s__Collinsella sp900547345	p__Actinomycetota
s__Collinsella sp900542085	p__Actinomycetota
s__Collinsella sp934654765	p__Actinomycetota
s__Collinsella sp900541015	p__Actinomycetota
s__Collinsella sp900542175	p__Actinomycetota
s__Collinsella sp019414645	p__Actinomycetota
s__Collinsella sp900541785	p__Actinomycetota
s__Collinsella sp905215815	p__Actinomycetota
s__Collinsella sp900762015	p__Actinomycetota
s__Collinsella sp900539735	p__Actinomycetota
s__Pauljensenia sp019425105	p__Actinomycetota
s__Collinsella sp019419585	p__Actinomycetota
s__g__Collinsella__39923_4#184_bin.7.orig_clean	p__Actinomycetota
s__Stercorousia sp001765415	p__Actinomycetota
s__Collinsella sp934654605	p__Actinomycetota
s__Collinsella sp900751665	p__Actinomycetota
s__Collinsella sp905215525	p__Actinomycetota
s__Collinsella sp900546455	p__Actinomycetota
s__Senegalimassilia sp934630815	p__Actinomycetota
s__Collinsella sp900542275	p__Actinomycetota
s__Collinsella sp018380195	p__Actinomycetota
s__Gordonibacter pamelaeae	p__Actinomycetota
s__Paratractidigestivibacter sp003150175	p__Actinomycetota
s__UBA1221 sp900770525	p__Actinomycetota
s__Collinsella sp900541145	p__Actinomycetota
s__Collinsella sp900541885	p__Actinomycetota
s__Bifidobacterium sp022739095	p__Actinomycetota
s__Slackia_A isoflavoniconvertens	p__Actinomycetota
s__Bifidobacterium catenulatum	p__Actinomycetota
s__g__Collinsella__47542_1#106_clean_bin.19.orig_cleaned	p__Actinomycetota
s__Actinomyces urogenitalis	p__Actinomycetota
s__Collinsella aerofaciens_AD	p__Actinomycetota
s__Collinsella sp934643435	p__Actinomycetota
s__UMGS1585 sp900766355	p__Actinomycetota
s__Senegalimassilia sp905215325	p__Actinomycetota
s__Collinsella sp900758475	p__Actinomycetota
s__Eggerthella guodeyinii	p__Actinomycetota
s__UBA7748 sp900314535	p__Actinomycetota
s__Anaerotardibacter sp000436075	p__Actinomycetota
s__Collinsella aerofaciens_X	p__Actinomycetota
s__Collinsella sp900554135	p__Actinomycetota
s__Collinsella sp905215095	p__Actinomycetota
s__Collinsella sp900550195	p__Actinomycetota
s__Pauljensenia radingae_A	p__Actinomycetota
s__Rothia sp001808955	p__Actinomycetota
s__Collinsella sp900550205	p__Actinomycetota
s__Collinsella sp900761615	p__Actinomycetota
s__Collinsella sp934668875	p__Actinomycetota
s__Zag111 sp002103105	p__Actinomycetota
s__Collinsella sp900757385	p__Actinomycetota
s__Collinsella sp019414205	p__Actinomycetota
s__g__Collinsella__47680_3#12_clean_bin.3.orig_cleaned	p__Actinomycetota
s__Collinsella sp905216175	p__Actinomycetota
s__g__Collinsella__47660_4#153_clean_bin.2.orig_cleaned	p__Actinomycetota
s__Collinsella sp900540875	p__Actinomycetota
s__Collinsella sp900542965	p__Actinomycetota
s__Collinsella sp900755685	p__Actinomycetota
s__Collinsella sp019419485	p__Actinomycetota
s__Collinsella sp900543505	p__Actinomycetota
s__Collinsella sp019424965	p__Actinomycetota
s__Collinsella sp934876235	p__Actinomycetota
s__Collinsella sp900541065	p__Actinomycetota
s__Collinsella sp019414515	p__Actinomycetota
s__Collinsella sp900550185	p__Actinomycetota
s__Collinsella sp900765115	p__Actinomycetota
s__g__Pauljensenia__47660_4#177_clean_bin.24.orig_cleaned	p__Actinomycetota
s__Collinsella sp900548515	p__Actinomycetota
s__g__Avigastranaerophilus__47542_1#134_clean_bin.1.permissive_cleaned	p__Actinomycetota
s__Zag111 sp003258735	p__Actinomycetota
s__Pseudoglutamicibacter cumminsii	p__Actinomycetota
s__Collinsella sp900761995	p__Actinomycetota
s__Collinsella sp900551205	p__Actinomycetota
s__Collinsella sp905208345	p__Actinomycetota
s__Collinsella sp934658705	p__Actinomycetota
s__Collinsella aerofaciens_O	p__Actinomycetota
s__Parolsenella sp900552935	p__Actinomycetota
s__Rothia sp902373285	p__Actinomycetota
s__g__Collinsella__38222_6#6_bin.15.strict_clean	p__Actinomycetota
s__Collinsella aerofaciens_J	p__Actinomycetota
s__Collinsella sp900556365	p__Actinomycetota
s__Collinsella sp900759435	p__Actinomycetota
s__Collinsella aerofaciens_AB	p__Actinomycetota
s__Collinsella sp905214425	p__Actinomycetota
s__Varibaculum cambriense_A	p__Actinomycetota
s__Bifidobacterium kashiwanohense_A	p__Actinomycetota
s__Scatousia sp900321895	p__Actinomycetota
s__Collinsella aerofaciens_N	p__Actinomycetota
s__Collinsella sp900549715	p__Actinomycetota
s__Collinsella sp902362275	p__Actinomycetota
s__Collinsella sp003458415	p__Actinomycetota
s__Collinsella sp018382125	p__Actinomycetota
s__Corynebacterium sp012837295	p__Actinomycetota
s__Collinsella sp900542165	p__Actinomycetota
s__Collinsella sp900541245	p__Actinomycetota
s__g__Collinsella__47660_4#118_clean_bin.21.strict_cleaned	p__Actinomycetota
s__Anaerotardibacter sp000435475	p__Actinomycetota
s__Eggerthella lenta	p__Actinomycetota
s__Corynebacterium amycolatum_A	p__Actinomycetota
s__Collinsella sp905214905	p__Actinomycetota
s__Collinsella sp019413925	p__Actinomycetota
s__Collinsella sp019414055	p__Actinomycetota
s__Collinsella sp900541675	p__Actinomycetota
s__Bifidobacterium merycicum	p__Actinomycetota
s__Collinsella sp905215765	p__Actinomycetota
s__Pauljensenia sp916719935	p__Actinomycetota
s__Pseudoglutamicibacter cumminsii_A	p__Actinomycetota
s__Collinsella sp934617135	p__Actinomycetota
s__Corynebacterium propinquum	p__Actinomycetota
s__Collinsella sp900545835	p__Actinomycetota
s__Collinsella sp900545905	p__Actinomycetota
s__Collinsella sp900549245	p__Actinomycetota
s__Collinsella sp003471585	p__Actinomycetota
s__Collinsella sp003475325	p__Actinomycetota
s__Collinsella sp934630735	p__Actinomycetota
s__Collinsella sp018381235	p__Actinomycetota
s__Collinsella sp900552145	p__Actinomycetota
s__UMGS1477 sp900552205	p__Actinomycetota
s__Collinsella sp905216075	p__Actinomycetota
s__Collinsella sp022720335	p__Actinomycetota
s__Collinsella sp934668695	p__Actinomycetota
s__Collinsella sp002232035	p__Actinomycetota
s__Collinsella sp900544115	p__Actinomycetota
s__Collinsella sp900549555	p__Actinomycetota
s__Collinsella sp900756765	p__Actinomycetota
s__Collinsella sp934668345	p__Actinomycetota
s__Pauljensenia sp900541895	p__Actinomycetota
s__Collinsella sp019425015	p__Actinomycetota
s__Collinsella sp900551305	p__Actinomycetota
s__Senegalimassilia anaerobia	p__Actinomycetota
s__Collinsella sp900548565	p__Actinomycetota
s__Collinsella sp900757465	p__Actinomycetota
s__Collinsella aerofaciens_Z	p__Actinomycetota
s__Actinomyces oris_C	p__Actinomycetota
s__Collinsella sp900542945	p__Actinomycetota
s__Collinsella sp900549185	p__Actinomycetota
s__Collinsella sp019419545	p__Actinomycetota
s__Collinsella sp900547125	p__Actinomycetota
s__Collinsella sp019414445	p__Actinomycetota
s__Collinsella sp900767675	p__Actinomycetota
s__Collinsella aerofaciens	p__Actinomycetota
s__Senegalimassilia sp934636665	p__Actinomycetota
s__Collinsella sp905214105	p__Actinomycetota
s__Collinsella sp900541875	p__Actinomycetota
s__Collinsella sp905194675	p__Actinomycetota
s__Collinsella sp900549655	p__Actinomycetota
s__Collinsella sp900752275	p__Actinomycetota
s__Collinsella sp900540935	p__Actinomycetota
s__Collinsella sp934667065	p__Actinomycetota
s__Collinsella sp019041915	p__Actinomycetota
s__Collinsella sp900762325	p__Actinomycetota
s__Collinsella aerofaciens_S	p__Actinomycetota
s__Collinsella sp900759565	p__Actinomycetota
s__Collinsella sp905215065	p__Actinomycetota
s__Collinsella sp019414465	p__Actinomycetota
s__UMGS1585 sp934693215	p__Actinomycetota
s__Collinsella sp905208635	p__Actinomycetota
s__Collinsella sp003469205	p__Actinomycetota
s__Collinsella sp900542825	p__Actinomycetota
s__Collinsella sp900541235	p__Actinomycetota
s__Collinsella sp900551815	p__Actinomycetota
s__Collinsella sp003462685	p__Actinomycetota
s__Collinsella sp900545055	p__Actinomycetota
s__Collinsella sp900550965	p__Actinomycetota
s__Collinsella sp934643145	p__Actinomycetota
s__Anaerotardibacter sp900553605	p__Actinomycetota
s__Collinsella sp900764025	p__Actinomycetota
s__Bifidobacterium dentium	p__Actinomycetota
s__Pauljensenia sp018382595	p__Actinomycetota
s__Collinsella sp900546085	p__Actinomycetota
s__Collinsella sp900548495	p__Actinomycetota
s__Pauljensenia sp000466265	p__Actinomycetota
s__Collinsella sp900546775	p__Actinomycetota
s__Collinsella sp900550825	p__Actinomycetota
s__g__Collinsella__47542_1#115_clean_bin.16.strict_cleaned	p__Actinomycetota
s__Collinsella sp900551655	p__Actinomycetota
s__Collinsella sp905214525	p__Actinomycetota
s__Collinsella sp900543615	p__Actinomycetota
s__Collinsella sp900556495	p__Actinomycetota
s__Bifidobacterium sp002742445	p__Actinomycetota
s__Collinsella sp900768795	p__Actinomycetota
s__Collinsella sp902364645	p__Actinomycetota
s__Collinsella aerofaciens_M	p__Actinomycetota
s__Collinsella aerofaciens_L	p__Actinomycetota
s__Parolsenella sp900543875	p__Actinomycetota
s__Pauljensenia turicensis	p__Actinomycetota
s__Collinsella sp900541125	p__Actinomycetota
s__Eggerthella timonensis	p__Actinomycetota
s__Collinsella sp900541175	p__Actinomycetota
s__Collinsella sp900541795	p__Actinomycetota
s__Collinsella sp900549345	p__Actinomycetota
s__Collinsella sp905209455	p__Actinomycetota
s__Rothia kristinae	p__Actinomycetota
s__Collinsella sp900544385	p__Actinomycetota
s__Collinsella sp900544095	p__Actinomycetota
s__Collinsella sp934654625	p__Actinomycetota
s__Collinsella sp900542235	p__Actinomycetota
s__Collinsella sp003459245	p__Actinomycetota
s__Collinsella sp900542635	p__Actinomycetota
s__Collinsella sp902363125	p__Actinomycetota
s__Collinsella sp900556875	p__Actinomycetota
s__Collinsella sp934655835	p__Actinomycetota
s__Raoultibacter massiliensis	p__Actinomycetota
s__Collinsella sp900543845	p__Actinomycetota
s__g__Collinsella__40054_2#58_bin.13.orig_clean	p__Actinomycetota
s__Collinsella sp902461085	p__Actinomycetota
s__g__Collinsella__39907_1#65_bin.26.strict_clean	p__Actinomycetota
s__Dietzia maris	p__Actinomycetota
s__g__Collinsella__39923_4#82_bin.12.permissive_clean	p__Actinomycetota
s__Stercorousia sp934717855	p__Actinomycetota
s__Collinsella sp900554645	p__Actinomycetota
s__Collinsella sp900544205	p__Actinomycetota
s__Collinsella sp019414045	p__Actinomycetota
s__Parolsenella massiliensis	p__Actinomycetota
s__Collinsella sp934630855	p__Actinomycetota
s__Collinsella sp900542155	p__Actinomycetota
s__Collinsella sp900541135	p__Actinomycetota
s__g__Collinsella__47660_4#145_clean_bin.15.strict_cleaned	p__Actinomycetota
s__g__Collinsella__47542_1#140_clean_bin.14.orig_cleaned	p__Actinomycetota
s__Collinsella aerofaciens_Y	p__Actinomycetota
s__Collinsella sp900548935	p__Actinomycetota
s__Collinsella sp022713905	p__Actinomycetota
s__Collinsella aerofaciens_W	p__Actinomycetota
s__Collinsella sp003459505	p__Actinomycetota
s__g__Collinsella__39907_1#64_bin.33.strict_clean	p__Actinomycetota
s__Collinsella sp900541055	p__Actinomycetota
s__g__Collinsella__39923_2#3_bin.21.strict_clean	p__Actinomycetota
s__Rothia sp015265375	p__Actinomycetota
s__Collinsella sp900541855	p__Actinomycetota
s__Collinsella sp905214465	p__Actinomycetota
s__Collinsella sp900542315	p__Actinomycetota
s__Bifidobacterium kashiwanohense	p__Actinomycetota
s__Collinsella sp900547835	p__Actinomycetota
s__Collinsella sp900545445	p__Actinomycetota
s__Collinsella sp900556415	p__Actinomycetota
s__Collinsella sp900544755	p__Actinomycetota
s__Zag111 sp002102825	p__Actinomycetota
s__Collinsella sp905197585	p__Actinomycetota
s__Collinsella sp900549025	p__Actinomycetota
s__Bifidobacterium pseudocatenulatum	p__Actinomycetota
s__Collinsella sp900555355	p__Actinomycetota
s__Collinsella sp900545665	p__Actinomycetota
s__g__Collinsella__47660_4#176_clean_bin.2.permissive_cleaned	p__Actinomycetota
s__Pauljensenia odontolytica_C	p__Actinomycetota
s__Collinsella sp905215725	p__Actinomycetota
s__Collinsella sp900550835	p__Actinomycetota
s__g__Collinsella__47542_1#107_clean_bin.9.orig_cleaned	p__Actinomycetota
s__Collinsella sp900757285	p__Actinomycetota
s__Corynebacterium urealyticum	p__Actinomycetota
s__Collinsella sp900541665	p__Actinomycetota
s__Collinsella aerofaciens_A	p__Actinomycetota
s__g__Collinsella__47660_4#6_clean_bin.3.strict_cleaned	p__Actinomycetota
s__Collinsella sp019419645	p__Actinomycetota
s__Stercorousia sp900769355	p__Actinomycetota
s__Collinsella aerofaciens_Q	p__Actinomycetota
s__Limenecus avicola	p__Actinomycetota
s__Collinsella sp019414545	p__Actinomycetota
s__Collinsella sp902363875	p__Actinomycetota
s__Corynebacterium amycolatum	p__Actinomycetota
s__Collinsella sp900549215	p__Actinomycetota
s__Collinsella sp900543945	p__Actinomycetota
s__Collinsella sp900760385	p__Actinomycetota
s__Collinsella sp900548255	p__Actinomycetota
s__Collinsella sp900554595	p__Actinomycetota
s__Collinsella sp022728415	p__Actinomycetota
s__Collinsella stercoripullorum	p__Actinomycetota
s__Collinsella aerofaciens_V	p__Actinomycetota
s__g__Collinsella__47660_4#43_clean_bin.14.permissive_cleaned	p__Actinomycetota
s__Collinsella sp900545605	p__Actinomycetota
s__Bifidobacterium bifidum	p__Actinomycetota
s__Collinsella bouchesdurhonensis	p__Actinomycetota
s__g__Collinsella__40054_2#180_bin.31.strict_clean	p__Actinomycetota
s__Collinsella sp905213265	p__Actinomycetota
s__g__Collinsella__38353_3#19_bin.15.permissive_clean	p__Actinomycetota
s__Collinsella aerofaciens_K	p__Actinomycetota
s__Rothia mucilaginosa	p__Actinomycetota
s__Collinsella sp900550355	p__Actinomycetota
s__Collinsella sp900757185	p__Actinomycetota
s__Saccharopolyspora rectivirgula	p__Actinomycetota
s__Collinsella aerofaciens_AA	p__Actinomycetota
s__Collinsella sp902399975	p__Actinomycetota
s__Bifidobacterium ruminantium	p__Actinomycetota
s__Collinsella sp019425045	p__Actinomycetota
s__Corynebacterium aurimucosum_E	p__Actinomycetota
s__Collinsella sp900768265	p__Actinomycetota
s__Collinsella sp900541685	p__Actinomycetota
s__Parolsenella catena	p__Actinomycetota
s__g__Bifidobacterium__39923_2#166_bin.30.strict_clean	p__Actinomycetota
s__Collinsella sp902388545	p__Actinomycetota
s__Collinsella aerofaciens_R	p__Actinomycetota
s__Collinsella sp900549085	p__Actinomycetota
s__Collinsella sp905197385	p__Actinomycetota
s__Collinsella sp900765185	p__Actinomycetota
s__Collinsella sp900553705	p__Actinomycetota
s__Collinsella sp900757595	p__Actinomycetota
s__Collinsella sp905214435	p__Actinomycetota
s__UMGS1477 sp900761525	p__Actinomycetota
s__Collinsella sp900547655	p__Actinomycetota
s__Collinsella aerofaciens_AJ	p__Actinomycetota
s__Collinsella sp900554465	p__Actinomycetota
s__Collinsella sp018378775	p__Actinomycetota
s__Collinsella sp900544865	p__Actinomycetota
s__Collinsella sp003469185	p__Actinomycetota
s__Collinsella sp905216045	p__Actinomycetota
s__Collinsella sp900553345	p__Actinomycetota
s__Pauljensenia sp902373545	p__Actinomycetota
s__g__Pauljensenia__39907_2#111_bin.9.strict_clean	p__Actinomycetota
s__Collinsella sp023656745	p__Actinomycetota
s__Collinsella aerofaciens_AH	p__Actinomycetota
s__g__Collinsella__40054_2#167_bin.2.strict_clean	p__Actinomycetota
s__Collinsella aerofaciens_H	p__Actinomycetota
s__Collinsella sp900764415	p__Actinomycetota
s__Paratractidigestivibacter faecalis	p__Actinomycetota
s__CAG-196 sp900549855	p__Actinomycetota
s__Collinsella sp934654775	p__Actinomycetota
s__Collinsella sp900546115	p__Actinomycetota
s__g__Bifidobacterium__47660_4#128_clean_bin.22.orig_cleaned	p__Actinomycetota
s__Lancefieldella sp022732885	p__Actinomycetota
s__Senegalimassilia faecalis	p__Actinomycetota
s__g__Collinsella__39907_1#38_bin.10.orig_clean	p__Actinomycetota
s__Collinsella sp934654795	p__Actinomycetota
s__Collinsella sp905216145	p__Actinomycetota
s__Parolsenella uli_A	p__Actinomycetota
s__Collinsella sp900541745	p__Actinomycetota
s__Collinsella sp900540855	p__Actinomycetota
s__g__Collinsella__47542_1#102_clean_bin.2.strict_cleaned	p__Actinomycetota
s__Collinsella sp900553215	p__Actinomycetota
s__Collinsella sp900556515	p__Actinomycetota
s__Collinsella aerofaciens_G	p__Actinomycetota
s__Collinsella sp900541715	p__Actinomycetota
s__Collinsella sp900549455	p__Actinomycetota
s__Collinsella sp900542555	p__Actinomycetota
s__g__Collinsella__47680_3#41_clean_bin.22.strict_cleaned	p__Actinomycetota
s__Collinsella sp019419455	p__Actinomycetota
s__Collinsella sp900541025	p__Actinomycetota
s__Collinsella sp900543275	p__Actinomycetota
s__Collinsella sp900754745	p__Actinomycetota
s__Collinsella sp905214615	p__Actinomycetota
s__Collinsella sp900768435	p__Actinomycetota
s__Collinsella sp014871665	p__Actinomycetota
s__g__Collinsella__39923_4#67_bin.8.orig_clean	p__Actinomycetota
s__g__Collinsella__40054_2#68_bin.13.strict_clean	p__Actinomycetota
s__Collinsella sp900540095	p__Actinomycetota
s__Anaerotardibacter sp934617065	p__Actinomycetota
s__Collinsella sp018376905	p__Actinomycetota
s__Collinsella sp902835305	p__Actinomycetota
s__Collinsella sp018373675	p__Actinomycetota
s__Ellagibacter sp934663775	p__Actinomycetota
s__Pauljensenia sp902373435	p__Actinomycetota
s__Collinsella sp900544465	p__Actinomycetota
s__Lawsonella sp018376445	p__Actinomycetota
s__Collinsella sp900540895	p__Actinomycetota
s__Collinsella sp900541185	p__Actinomycetota
s__Rothia mucilaginosa_A	p__Actinomycetota
s__Collinsella sp900552875	p__Actinomycetota
s__Collinsella sp905209765	p__Actinomycetota
s__Collinsella sp900551015	p__Actinomycetota
s__Collinsella sp019419555	p__Actinomycetota
s__Bifidobacterium breve	p__Actinomycetota
s__Collinsella sp905215275	p__Actinomycetota
s__Rothia mucilaginosa_B	p__Actinomycetota
s__Collinsella sp900552705	p__Actinomycetota
s__Collinsella sp900540985	p__Actinomycetota
s__Collinsella aerofaciens_AC	p__Actinomycetota
s__Collinsella sp900757495	p__Actinomycetota
s__Collinsella sp900547765	p__Actinomycetota
s__g__Collinsella__47542_1#96_clean_bin.34.strict_cleaned	p__Actinomycetota
s__Collinsella sp902388345	p__Actinomycetota
s__Collinsella sp900551625	p__Actinomycetota
s__Bifidobacterium longum	p__Actinomycetota
s__Paratractidigestivibacter sp905215465	p__Actinomycetota
s__Collinsella sp905207425	p__Actinomycetota
s__Parolsenella uli_B	p__Actinomycetota
s__Collinsella sp905211615	p__Actinomycetota
s__g__Collinsella__39923_4#52_bin.1.strict_clean	p__Actinomycetota
s__Collinsella sp900552185	p__Actinomycetota
s__Adlercreutzia equolifaciens	p__Actinomycetota
s__Bifidobacterium crudilactis	p__Actinomycetota
s__Pauljensenia sp900556405	p__Actinomycetota
s__Collinsella sp934650975	p__Actinomycetota
s__Collinsella sp019414325	p__Actinomycetota
s__Parolsenella sp900544655	p__Actinomycetota
s__Collinsella sp900554155	p__Actinomycetota
s__Collinsella sp014871605	p__Actinomycetota
s__CAG-196 sp900553895	p__Actinomycetota
s__Collinsella sp900556445	p__Actinomycetota
s__Collinsella sp022745215	p__Actinomycetota
s__Collinsella sp934675795	p__Actinomycetota
s__Collinsella sp900544845	p__Actinomycetota
s__Lancefieldella sp902373375	p__Actinomycetota
s__Collinsella sp900554585	p__Actinomycetota
s__Collinsella sp905215505	p__Actinomycetota
s__Collinsella sp905215385	p__Actinomycetota
s__Stercorousia sp000437435	p__Actinomycetota
s__Collinsella sp003437035	p__Actinomycetota
s__g__Collinsella__39907_1#60_bin.14.orig_clean	p__Actinomycetota
