# Supplementary material for: Ancestral trajectory of infant gut microbiome assembly in non-industrialised populations
Source: Research Square preprint supplement (doi:10.21203/rs.3.rs-6675732/v1), 2025-05-30
Supplement: Supplementary file 11 [file a6c1d6649cb1c17cf89cba3e.xlsx]

## Sheet: Sheet1
Species	Mean relative abundance	Prevalence
s__Bifidobacterium infantis	0.195789	0.667785
s__Escherichia coli	0.0567989	0.994966
s__Prevotella copri_A	0.0375413	0.308725
s__Bifidobacterium bifidum	0.0345216	0.647651
s__Bifidobacterium breve	0.0311755	0.744966
s__Faecalibacterium longum	0.0308222	0.714765
s__Bifidobacterium kashiwanohense_A	0.0214168	0.211409
s__Prevotella sp934191715	0.0195489	0.275168
s__Bifidobacterium sp002742445	0.018883	0.291946
s__Ligilactobacillus ruminis	0.0147116	0.52349
s__Veillonella_A sp000431435	0.0139772	0.318792
s__Bifidobacterium longum	0.0137473	0.379195
s__Megasphaera sp000417505	0.0132969	0.184564
s__Streptococcus sp934229725	0.012928	0.624161
s__Bacteroides fragilis	0.0128249	0.471477
s__Streptococcus sp000187445	0.0120154	0.627517
s__Streptococcus lutetiensis	0.0113006	0.508389
s__Megamonas funiformis	0.0102781	0.52349
s__Streptococcus infantarius	0.00930697	0.494966
s__Klebsiella pneumoniae	0.00819941	0.592282
s__Parolsenella uli_B	0.00802697	0.25
s__Streptococcus pasteurianus	0.00736386	0.223154
s__Bifidobacterium kashiwanohense	0.00732593	0.13255
s__Anaerostipes hadrus	0.00702077	0.578859
s__Bifidobacterium pseudocatenulatum	0.00643946	0.172819
s__Gemmiger formicilis	0.00620058	0.494966
s__Ruminococcus_B gnavus	0.00569901	0.536913
s__Agathobacter rectalis	0.00548283	0.317114
s__Phocaeicola vulgatus	0.00540837	0.501678
s__Veillonella sp022737715	0.00518994	0.600671
s__Streptococcus salivarius	0.00505259	0.444631
s__Dorea_A longicatena_B	0.0049744	0.630872
s__Prevotella sp002265625	0.00461991	0.174497
s__Veillonella sp018367495	0.00461742	0.493289
s__Ruminococcus_E bromii_B	0.00447504	0.25
s__g__Bifidobacterium__47660_4#128_clean_bin.22.orig_cleaned	0.00411389	0.16443
s__Collinsella sp900556495	0.00404895	0.313758
s__Prevotella sp900544825	0.00374115	0.090604
s__Lactobacillus paragasseri	0.0036995	0.293624
s__Prevotella stercorea	0.0035232	0.107383
s__Agathobacter faecis	0.00343137	0.362416
s__Limosilactobacillus mucosae	0.00339406	0.345638
s__Bacteroides uniformis	0.00338041	0.515101
s__Campylobacter_D jejuni	0.00336416	0.243289
s__Faecalibacterium prausnitzii_E	0.00333178	0.172819
s__Blautia_A wexlerae	0.00327402	0.411074
s__Collinsella aerofaciens_H	0.0032101	0.402685
s__Bacteroides fragilis_A	0.00317917	0.327181
s__Streptococcus sp934196125	0.00307464	0.288591
s__Akkermansia muciniphila	0.00307364	0.182886
s__Veillonella sp934230905	0.00284774	0.729866
s__Succinivibrio sp000431835	0.00283463	0.152685
s__Phocaeicola dorei	0.00276584	0.268456
s__Blautia_A massiliensis	0.00274335	0.481544
s__Campylobacter infans	0.00271115	0.246644
s__Phocaeicola plebeius_A	0.00270831	0.130872
s__Megasphaera sp002319965	0.00267794	0.0822148
s__Prevotella sp000434975	0.00266654	0.0654362
s__Mediterraneibacter faecis	0.0026511	0.369128
s__Prevotella sp900767615	0.00258888	0.0889262
s__Catenibacterium sp000437715	0.00249868	0.206376
s__Megasphaera sp900540735	0.00249461	0.152685
s__Prevotella hominis	0.00249069	0.120805
s__Copromonas sp900066535	0.0024564	0.709732
s__Prevotella sp900313215	0.00235409	0.114094
s__Bacteroides thetaiotaomicron	0.00233451	0.469799
s__Alloprevotella timonensis	0.00225947	0.142617
s__Megasphaera sp001546855	0.00222792	0.0587248
s__Bacteroides ovatus	0.00221878	0.518456
s__Megasphaera massiliensis	0.00215838	0.0671141
s__Veillonella sp900538355	0.00215041	0.642617
s__Streptococcus lactarius	0.00214263	0.830537
s__Alloprevotella sp900540885	0.00214012	0.0805369
s__Megasphaera elsdenii	0.0021282	0.0738255
s__Bacteroides caccae	0.0021168	0.224832
s__Enterocloster sp900541315	0.00208707	0.697987
s__Roseburia inulinivorans	0.00204928	0.39094
s__Fimenecus sp000432435	0.00203676	0.166107
s__Parabacteroides distasonis	0.00202639	0.540268
s__Agathobaculum butyriciproducens	0.00193847	0.620805
s__Brachyspira pilosicoli	0.00191067	0.0805369
s__Campylobacter_D sp934718785	0.00190307	0.0469799
s__Enterococcus_B hirae	0.00184132	0.238255
s__Blautia_A sp003471165	0.00180617	0.248322
s__Sarcina ventriculi	0.00174377	0.260067
s__Fusicatenibacter saccharivorans	0.00174071	0.458054
s__Catenibacterium mitsuokai	0.00169415	0.17953
s__Prevotella sp900546575	0.00166389	0.120805
s__Blautia_A obeum	0.00166253	0.454698
s__Prevotella sp900546535	0.00161564	0.0738255
s__Limosilactobacillus fermentum	0.00161545	0.270134
s__Faecalibacterium sp900539885	0.00161195	0.231544
s__Anaerobutyricum hallii	0.00161175	0.416107
s__Enterococcus_B faecium	0.00160265	0.5
s__Holdemanella biformis	0.00159877	0.231544
s__Dialister sp022722495	0.00159588	0.248322
s__Faecalibacterium prausnitzii_D	0.00158067	0.224832
s__Sutterella wadsworthensis	0.00156941	0.531879
s__Anaerostipes sp018918155	0.00156032	0.090604
s__Senegalimassilia anaerobia	0.00155225	0.620805
s__Dorea formicigenerans	0.00154597	0.612416
s__Prevotella sp934202525	0.00141046	0.0687919
s__Bifidobacterium adolescentis	0.00138092	0.114094
s__Veillonella parvula_A	0.00136821	0.815436
s__Prevotella sp900290275	0.00134231	0.13255
s__Faecalibacterium duncaniae	0.00133944	0.256711
s__Ureaplasma sp900544585	0.00126634	0.234899
s__Veillonella atypica	0.00120852	0.59396
s__Klebsiella quasipneumoniae	0.00116823	0.399329
s__Enterobacter roggenkampii	0.00114863	0.496644
s__Prevotella sp021636625	0.00114489	0.0738255
s__Prevotella sp900556795	0.00114144	0.0402685
s__Limosilactobacillus vaginalis	0.00112249	0.186242
s__Prevotella sp015074785	0.00111107	0.107383
s__Lachnospira eligens_A	0.00109349	0.379195
s__Acetatifactor sp003447295	0.0010871	0.300336
s__Clostridium sp900540255	0.00106715	0.473154
s__Faecalibacterium prausnitzii_A	0.00106535	0.145973
s__g__Veillonella__47660_4#28_clean_bin.18.orig_cleaned	0.00106256	0.612416
s__Prevotella sp900551275	0.00104533	0.0620805
s__Prevotella copri	0.00103427	0.0973154
s__Parabacteroides merdae	0.00101979	0.268456
s__CAG-217 sp000436335	0.00101516	0.236577
s__Bacteroides stercoris	0.000990291	0.159396
s__Mitsuokella multacida	0.000980256	0.115772
s__Blautia_A sp000436615	0.000970384	0.171141
s__Limisoma sp000437795	0.000969065	0.174497
s__Holdemanella sp900556915	0.000966356	0.238255
s__Prevotella sp003447235	0.00096623	0.104027
s__RUG115 sp900066395	0.000925998	0.14094
s__Faecalibacterium sp900539945	0.00092475	0.211409
s__Anaerobutyricum soehngenii	0.000923695	0.29698
s__Faecalimonas phoceensis	0.000919943	0.199664
s__Intestinibacter bartlettii	0.000917448	0.716443
s__Mediterraneibacter lactaris	0.000914917	0.199664
s__Faecalibacillus intestinalis	0.000904857	0.340604
s__Bifidobacterium catenulatum	0.000886521	0.0738255
s__Enterobacter cloacae	0.000863716	0.302013
s__Agathobacter sp900317585	0.000852093	0.157718
s__Stercorousia sp001765415	0.000794904	0.105705
s__Campylobacter_D sp900539255	0.000781455	0.100671
s__Dialister sp000434475	0.000777114	0.17953
s__Zag111 sp002103105	0.00077345	0.114094
s__Alistipes finegoldii	0.000771773	0.228188
s__Ruminococcus_E sp934476515	0.000770784	0.0805369
s__Lactococcus garvieae	0.000765828	0.342282
s__Bacteroides xylanisolvens	0.000764955	0.412752
s__Campylobacter_D upsaliensis	0.00076451	0.157718
s__Streptococcus thermophilus	0.000761794	0.313758
s__Prevotella sp934230115	0.000750153	0.0251678
s__Prevotella copri_C	0.000744023	0.0687919
s__Alistipes putredinis	0.000733081	0.256711
s__Oliverpabstia intestinalis	0.000729001	0.20302
s__ER4 sp000765235	0.000728189	0.236577
s__Akkermansia muciniphila_E	0.00071802	0.0419463
s__Haemophilus_D parainfluenzae_K	0.000717418	0.694631
s__Limosilactobacillus oris	0.000714759	0.186242
s__g__Bifidobacterium__39923_2#166_bin.30.strict_clean	0.000711546	0.0352349
s__Acetatifactor sp900066565	0.000710874	0.265101
s__Prevotella sp900543975	0.00069545	0.0939597
s__Prevotella sp000436035	0.000680977	0.0536913
s__Thomasclavelia ramosa	0.000680552	0.615772
s__Fusobacterium_A mortiferum	0.000680126	0.270134
s__Alistipes shahii	0.000677635	0.253356
s__Enterococcus_A avium	0.000675926	0.508389
s__Flavonifractor plautii	0.000673254	0.659396
s__Veillonella_A seminalis	0.000659339	0.0738255
s__Weissella confusa	0.000656238	0.451342
s__Gemmiger sp900539695	0.000653535	0.213087
s__Eggerthella lenta	0.000647267	0.612416
s__Alloprevotella sp900541575	0.00064695	0.0285235
s__Roseburia intestinalis	0.000644362	0.0687919
s__Oliverpabstia faecicola	0.000638697	0.211409
s__Bariatricus comes	0.000634363	0.228188
s__Faecalibacterium prausnitzii_I	0.000622547	0.130872
s__Rothia sp902373285	0.000602085	0.872483
s__Streptococcus macedonicus	0.000590328	0.224832
s__Pauljensenia sp902373435	0.00058657	0.592282
s__Zag111 sp002102825	0.000586422	0.0520134
s__Blautia_A faecis	0.000585999	0.271812
s__Parolsenella massiliensis	0.00058353	0.100671
s__Paratractidigestivibacter faecalis	0.00057951	0.263423
s__g__Collinsella__47680_3#12_clean_bin.3.orig_cleaned	0.000569947	0.197987
s__Coprococcus_A catus	0.000568883	0.258389
s__Agathobacter sp905209075	0.000566957	0.0956376
s__Sutterella sp934255515	0.00056578	0.159396
s__Ruminococcus_E sp003526955	0.000565408	0.125839
s__Duodenibacillus massiliensis	0.000562992	0.271812
s__Anaerostipes sp900066705	0.000562767	0.0973154
s__Parolsenella uli_A	0.000551969	0.0687919
s__Klebsiella variicola	0.00052776	0.530201
s__Acetatifactor intestinalis	0.000526699	0.260067
s__Ligilactobacillus salivarius	0.000526512	0.197987
s__Phocaeicola coprocola	0.000525147	0.0738255
s__Alistipes onderdonkii	0.000521483	0.174497
s__Limosilactobacillus gastricus	0.000520107	0.187919
s__Roseburia hominis	0.000519933	0.261745
s__Helicobacter_B fennelliae	0.00051811	0.0989933
s__Anaeroglobus micronuciformis	0.000517828	0.491611
s__Alloprevotella sp900539625	0.000512729	0.0503356
s__Streptococcus sp001556435	0.000510328	0.223154
s__Leuconostoc lactis	0.000506125	0.397651
s__Faecalibacillus faecis	0.00050118	0.208054
s__Enterobacter hormaechei_A	0.000499171	0.40604
s__Faecalibacterium prausnitzii_J	0.000493395	0.0838926
s__Veillonella sp900550175	0.000489242	0.625839
s__Prevotella sp002299635	0.000489211	0.033557
s__Clostridium sp000435835	0.000483158	0.379195
s__UBA1417 sp003531055	0.000478668	0.122483
s__Faecalibacterium sp900758465	0.000475416	0.0989933
s__Prevotella sp945863825	0.000473224	0.0436242
s__Campylobacter_D coli	0.000470736	0.139262
s__Dorea_A longicatena	0.000469299	0.181208
s__Prevotella sp900765465	0.000468966	0.0234899
s__Mediterraneibacter torques	0.000466728	0.176174
s__Lachnospira sp000436475	0.000462568	0.280201
s__Butyrivibrio_A crossotus	0.00045581	0.0637584
s__Parolsenella catena	0.000454719	0.112416
s__Copromonas sp900066785	0.000443389	0.328859
s__Haemophilus_D parainfluenzae	0.000435722	0.686242
s__Odoribacter splanchnicus	0.0004341	0.288591
s__Clostridium_Q fessum	0.000425041	0.325503
s__Haemophilus_D sp900764435	0.000420478	0.671141
s__Veillonella sp934183145	0.000415044	0.58557
s__Coprococcus_A catus_A	0.000406896	0.285235
s__Bifidobacterium sp022739095	0.000403302	0.0788591
s__Bifidobacterium angulatum	0.000400161	0.0469799
s__Eubacterium_R sp900542875	0.00039839	0.0922819
s__Cetobacterium_A sp934085975	0.000397936	0.033557
s__Hominisplanchenecus faecis	0.000393276	0.154362
s__Roseburia sp019411365	0.000383765	0.219799
s__ER4 sp900317525	0.000381825	0.159396
s__Anaerotignum faecicola	0.000378486	0.263423
s__Anaerovibrio sp900548165	0.000378438	0.033557
s__KLE1615 sp934292725	0.000375386	0.347315
s__Prevotella sp900555035	0.000374535	0.0520134
s__CAG-269 sp003525075	0.000372465	0.0822148
s__Bifidobacterium animalis	0.00037154	0.0620805
s__CAG-568 sp000434395	0.000364008	0.0620805
s__Lactobacillus crispatus	0.000363146	0.102349
s__Evtepia sp004556345	0.000359547	0.209732
s__g__Haemophilus_D__38353_3#32_bin.10.orig_clean	0.000357821	0.64094
s__CAG-245 sp000435175	0.000355153	0.129195
s__Sutterella wadsworthensis_A	0.000351052	0.192953
s__Streptococcus parasanguinis_H	0.000350985	0.64094
s__Vescimonas coprocola	0.000349269	0.238255
s__Faecalibacterium sp003449675	0.000348342	0.0805369
s__g__Haemophilus_D__39923_2#158_bin.13.orig_clean	0.000345324	0.604027
s__Gemmiger qucibialis	0.000344541	0.171141
s__Ralstonia sp913056305	0.000344383	0.879195
s__Cryptobacteroides sp000435075	0.000343615	0.0436242
s__Wujia chipingensis	0.000341276	0.0855705
s__Dialister sp934193095	0.000338088	0.134228
s__CAG-245 sp934131055	0.000336105	0.125839
s__KLE1615 sp900066985	0.000330657	0.322148
s__Eubacterium_R sp000436835	0.000330102	0.112416
s__Akkermansia muciniphila_B	0.000325765	0.0872483
s__Veillonella sp905214495	0.000322499	0.577181
s__Agathobacter sp900543445	0.000315334	0.045302
s__Bacteroides clarus	0.000314957	0.119128
s__Bacteroides sp900755095	0.000308757	0.370805
s__Allisonella histaminiformans	0.00030783	0.308725
s__Faecalibacterium sp934524985	0.00030743	0.0939597
s__Veillonella sp900550455	0.000307213	0.290268
s__CAG-41 sp900066215	0.00030712	0.276846
s__Lachnospira eligens	0.000302514	0.302013
s__Agathobaculum sp003481705	0.000301127	0.243289
s__Slackia_A isoflavoniconvertens	0.000291684	0.389262
s__Vescimonas sp900552475	0.000290684	0.201342
s__Streptococcus vestibularis	0.000286295	0.234899
s__Clostridium_AQ innocuum	0.000284239	0.466443
s__Phascolarctobacterium_A succinatutens	0.000284069	0.0855705
s__Sutterella faecalis	0.000283935	0.223154
s__Ruminococcus_C sp000433635	0.000282604	0.127517
s__Vescimonas sp000435975	0.00028167	0.13255
s__Lachnospira sp000437735	0.000281509	0.162752
s__Escherichia ruysiae	0.000278517	0.266779
s__COE1 sp001916965	0.000277069	0.124161
s__Terrisporobacter sp900557165	0.000271467	0.518456
s__Lachnospira sp019424245	0.000271232	0.33557
s__UMGS1820 sp902797885	0.000265793	0.0922819
s__Cryptobacteroides sp900544195	0.000259322	0.045302
s__Parabacteroides goldsteinii	0.000259192	0.0989933
s__Eubacterium_I ramulus	0.000257898	0.224832
s__Phascolarctobacterium faecium	0.000257153	0.0738255
s__Haemophilus_A parahaemolyticus_A	0.000253499	0.350671
s__Haemophilus seminalis	0.000253088	0.588926
s__Veillonella sp915066865	0.000251843	0.699664
s__Schaedlerella sp900066545	0.000251801	0.129195
s__Haemophilus_D sp015255025	0.000249548	0.642617
s__Haemophilus_D sp001815355	0.000247393	0.645973
s__Bilophila wadsworthia	0.000246501	0.338926
s__Mediterraneibacter sp934309345	0.000245081	0.114094
s__Veillonella sp900549805	0.000239783	0.27349
s__Limosilactobacillus portuensis	0.000237664	0.11745
s__Prevotella buccae	0.000236458	0.0503356
s__Prevotella sp002251385	0.000236062	0.122483
s__Clostridium sp001916075	0.000235702	0.338926
s__Faecalibacterium prausnitzii_F	0.000232706	0.033557
s__Phascolarctobacterium_A sp022718015	0.000232012	0.0805369
s__Vescimonas sp001916855	0.000230264	0.090604
s__Dialister succinatiphilus	0.000229107	0.0536913
s__Enterococcus_D gallinarum	0.000226582	0.394295
s__Lachnospira rogosae	0.000226366	0.223154
s__CAG-103 sp900543625	0.000224759	0.134228
s__Ruthenibacterium lactatiformans	0.000222817	0.243289
s__Prevotella sp000436915	0.000221675	0.0402685
s__Collinsella sp900754075	0.000220372	0.213087
s__CAG-882 sp003486385	0.000218732	0.0637584
s__Eubacterium_R sp900539165	0.000218328	0.0755034
s__Bacteroides nordii	0.000216651	0.182886
s__Anaerostipes sp905215045	0.000215675	0.221477
s__Megasphaera elsdenii_A	0.000212757	0.0486577
s__Enterococcus faecalis	0.000209889	0.265101
s__Roseburia_A sp934364805	0.000209598	0.0620805
s__Agathobacter sp900552085	0.000205929	0.0385906
s__Agathobaculum sp900544475	0.000205184	0.191275
s__Haemophilus_D parainfluenzae_A	0.000204439	0.59396
s__Veillonella sp934202095	0.000202918	0.513423
s__Enterocloster sp000431375	0.000202177	0.194631
s__Prevotella sp900553155	0.000199771	0.0352349
s__Dialister invisus	0.000198995	0.0738255
s__Duodenibacillus intestinavium	0.00019794	0.0486577
s__Eubacterium_F sp003491505	0.000197234	0.0872483
s__Ruminococcus_D bicirculans	0.000196932	0.105705
s__Intestinibacter sp900540355	0.000196929	0.439597
s__UBA1436 sp900540405	0.000196467	0.011745
s__Faecalibacterium sp905215595	0.000195783	0.107383
s__Lawsonibacter sp014287875	0.000193026	0.194631
s__CAG-307 sp900547045	0.000191647	0.0654362
s__Streptococcus sp003521145	0.000189957	0.300336
s__Haemophilus_D sp905214375	0.000188055	0.645973
s__Ruminococcus_D sp934435205	0.000187081	0.0939597
s__g__Copromonas__40054_2#165_bin.15.strict_clean	0.000186792	0.407718
s__Veillonella parvula	0.000186549	0.671141
s__Choladocola sp003481535	0.000185658	0.261745
s__Coprococcus eutactus_A	0.000185213	0.0721477
s__DXTB01 sp019410105	0.000183382	0.540268
s__Parolsenella sp900549525	0.000183272	0.0486577
s__Pauljensenia sp900541895	0.000182242	0.795302
s__Veillonella nakazawae	0.000180385	0.552013
s__Limosilactobacillus reuteri_E	0.000177972	0.107383
s__Lancefieldella sp022732885	0.000177616	0.600671
s__Pediococcus acidilactici	0.000177276	0.0033557
s__Megasphaera sp900554215	0.000176795	0.0788591
s__Collinsella sp900554595	0.000176509	0.283557
s__Roseburia sp003470905	0.000176349	0.0956376
s__Eubacterium_R sp000433975	0.000175687	0.0520134
s__Ventrenecus sp905205665	0.00017364	0.10906
s__Blautia_A sp900066205	0.000172809	0.100671
s__Romboutsia timonensis	0.000172383	0.419463
s__Barnesiella intestinihominis	0.00017023	0.0721477
s__Enterococcus_A raffinosus	0.000170174	0.265101
s__Haemophilus_D sp900756155	0.000170018	0.619128
s__Eisenbergiella sp900066775	0.000169611	0.241611
s__Ventrimonas sp900770535	0.000169418	0.411074
s__Veillonella sp900552715	0.000169145	0.552013
s__CAG-964 sp000435335	0.000166629	0.0218121
s__Ventrimonas sp003478505	0.000166121	0.317114
s__Eubacterium_I ramulus_A	0.000165234	0.152685
s__Neisseria sp000186165	0.00016365	0.441275
s__Ventrimonas sp900555625	0.000163446	0.151007
s__Streptococcus peroris	0.000163155	0.654362
s__CAG-177 sp003514385	0.000161486	0.0704698
s__Holdemanella sp900547815	0.000161485	0.120805
s__Haemophilus_D sp900756875	0.000161058	0.578859
s__Lachnospira sp000436535	0.000158738	0.110738
s__Onthousia sp934130405	0.000158667	0.0721477
s__Anaerostipes sp019423795	0.000157875	0.238255
s__Prevotella sp900552675	0.000157673	0.0318792
s__Clostridioides difficile	0.000156279	0.161074
s__Haemophilus_D sp019423005	0.000155492	0.657718
s__Vescimonas sp000435555	0.000155279	0.147651
s__Ruminococcus_C callidus	0.000155179	0.125839
s__Butyrivibrio_A sp000431815	0.000154523	0.0520134
s__CAG-349 sp003539515	0.000153781	0.0167785
s__Veillonella sp900545205	0.000152753	0.587248
s__Butyricicoccus_A intestinisimiae	0.000150166	0.0956376
s__Ventrimonas sp003480315	0.000149951	0.206376
s__Veillonella sp002959755	0.000149877	0.540268
s__Acidaminococcus intestini	0.000149037	0.0419463
s__Haemophilus_D parainfluenzae_N	0.000148828	0.635906
s__Choladocola sp003480725	0.000147221	0.211409
s__Sodaliphilus sp004557565	0.000146837	0.0218121
s__g__Pauljensenia__39907_2#111_bin.9.strict_clean	0.000146689	0.285235
s__Lactococcus lactis	0.000146613	0.213087
s__Blautia stercoris	0.000145919	0.0738255
s__Limivivens sp900543575	0.000145716	0.214765
s__UBA7173 sp900546835	0.000145503	0.0151007
s__Blautia_A sp900066335	0.000145391	0.135906
s__Haemophilus_D sp927911595	0.000145307	0.614094
s__Haemophilus_D parainfluenzae_M	0.000144358	0.607383
s__Haemophilus_D sp905215245	0.000144347	0.541946
s__Veillonella_A magna	0.000144159	0.0184564
s__Stercorousia sp900769355	0.000143624	0.0369128
s__Haemophilus_D sp019423025	0.000143403	0.619128
s__Eubacterium_G ventriosum	0.000143117	0.142617
s__Pseudoruminococcus massiliensis	0.000142177	0.0436242
s__Haemophilus_D sp905207935	0.000141837	0.630872
s__Bariatricus comes_A	0.00014051	0.162752
s__Prevotella sp900548745	0.000140156	0.0318792
s__CAG-103 sp000432375	0.000139481	0.134228
s__Clostridium neonatale	0.00013829	0.151007
s__Desulfovibrio sp900556755	0.000138037	0.142617
s__Bariatricus sp934320645	0.000138017	0.270134
s__Veillonella sp934216375	0.000137707	0.691275
s__Sarcina perfringens	0.000136851	0.347315
s__Lachnoclostridium_B sp900066555	0.00013562	0.221477
s__g__Collinsella__40054_2#58_bin.13.orig_clean	0.000134785	0.22651
s__Dialister sp900538805	0.000134726	0.00671141
s__Lachnospira sp900316325	0.00013294	0.167785
s__Gemmiger variabilis_B	0.000132355	0.090604
s__Bacteroides fragilis_B	0.000132272	0.201342
s__Zag111 sp003258735	0.00013171	0.0469799
s__Enterocloster bolteae	0.00013129	0.258389
s__Senegalimassilia faecalis	0.000130544	0.295302
s__Clostridium butyricum	0.00013051	0.0872483
s__Lactobacillus absiana	0.000129691	0.0201342
s__UBA1829 sp900549415	0.000128539	0.0201342
s__Faecalibacterium sp934561115	0.000127349	0.127517
s__UBA3402 sp934418055	0.000127158	0.352349
s__Veillonella sp019414865	0.000126359	0.602349
s__CAG-303 sp900539455	0.000125542	0.0184564
s__Blautia_A sp900751995	0.000125475	0.285235
s__CAG-95 sp900066375	0.000125282	0.090604
s__Lentihominibacter faecis	0.000124858	0.208054
s__Blautia_A schinkii	0.000124671	0.104027
s__Phocaeicola sp900760795	0.000122556	0.291946
s__CAG-103 sp900757655	0.000120836	0.0989933
s__Citrobacter youngae	0.000120672	0.152685
s__Acinetobacter baumannii	0.000119102	0.191275
s__Veillonella sp905209685	0.000118675	0.520134
s__Dysosmobacter sp001916835	0.000115711	0.102349
s__Kluyvera georgiana	0.000115598	0.125839
s__Enterocloster sp900538485	0.000115186	0.119128
s__Streptococcus sp900755085	0.000113793	0.672819
s__g__Collinsella__47660_4#153_clean_bin.2.orig_cleaned	0.000113396	0.196309
s__Anaerovibrio sp934203205	0.000112949	0.0234899
s__NHYM01 sp944323755	0.000112436	0.0268456
s__Haemophilus_D parainfluenzae_L	0.000112427	0.590604
s__Aeromonas caviae	0.000112224	0.100671
s__Vescimonas fastidiosa	0.000112133	0.0805369
s__Eubacterium_R sp934525195	0.000111909	0.0352349
s__Butyribacter sp000436755	0.000111113	0.0838926
s__Veillonella sp003463825	0.000110919	0.572148
s__Bulleidia sp900539965	0.000110883	0.0822148
s__g__Nanoperiomorbus__40054_3#181_bin.16.permissive_clean	0.000110174	0.0134228
s__Escherichia albertii	0.00011003	0.20302
s__Cryptobacteroides sp000432515	0.000109774	0.0302013
s__Veillonella infantium	0.000109328	0.573826
s__Eubacterium callanderi	0.000109073	0.172819
s__Sutterella sp900770335	0.000109069	0.0419463
s__Alistipes_A indistinctus	0.000108774	0.149329
s__Parasutterella excrementihominis	0.000108648	0.149329
s__g__Collinsella__40054_2#62_bin.14.orig_clean	0.000108068	0.219799
s__Faecousia sp003525905	0.00010741	0.172819
s__Veillonella sp934190855	0.000107327	0.434564
s__Scatocola faecipullorum	0.000107162	0.0352349
s__Haemophilus_D sp900755445	0.00010704	0.598993
s__Veillonella sp902834965	0.000106104	0.604027
s__Clostridium_Q symbiosum	0.000105356	0.241611
s__Agathobaculum sp934504345	0.000104559	0.248322
s__Catenibacterium sp900764565	0.000104472	0.0302013
s__Enterobacter vonholyi	0.000104306	0.263423
s__Bacteroides faecis	0.000103627	0.0520134
s__Pauljensenia sp900556405	0.000103508	0.645973
s__Veillonella sp900765235	0.000103204	0.474832
s__UBA1436 sp002329395	0.000102661	0.0100671
s__URXU01 sp900541915	0.000102331	0.011745
s__Dysosmobacter sp900550685	0.000102158	0.305369
s__g__Collinsella__39907_1#65_bin.26.strict_clean	0.000102114	0.145973
s__Cryptobacteroides sp000433355	0.000101648	0.0167785
s__CAG-269 sp001916065	0.000101325	0.0587248
s__Vescimonas sp003487665	9.94607e-05	0.174497
s__Hominisplanchenecus sp900551235	9.93533e-05	0.129195
s__Providencia alcalifaciens_A	9.92218e-05	0.0385906
s__Faecalibacterium sp014858325	9.8525e-05	0.0721477
s__Lactococcus petauri	9.83006e-05	0.192953
s__Veillonella sp900556785	9.79478e-05	0.61745
s__Pauljensenia sp000411415	9.77668e-05	0.692953
s__Roseburia sp003483745	9.76334e-05	0.105705
s__Dorea_A sp934294775	9.75759e-05	0.139262
s__Haemophilus_D sp001679485	9.73939e-05	0.605705
s__Veillonella sp019419725	9.67148e-05	0.615772
s__CAG-724 sp905202255	9.62573e-05	0.0251678
s__g__Nanogingivalis__39923_1#7_bin.20.permissive_clean	9.57822e-05	0.27349
s__Methanobrevibacter_A smithii	9.5522e-05	0.0184564
s__Veillonella sp915069625	9.49108e-05	0.575503
s__Lactobacillus johnsonii	9.48309e-05	0.13255
s__Lactobacillus gasseri	9.47028e-05	0.114094
s__Tyzzerella sp018371275	9.46994e-05	0.161074
s__Vescimonas sp003539495	9.42274e-05	0.0822148
s__Copromonas sp934370915	9.34573e-05	0.481544
s__CAG-170 sp000432135	9.33209e-05	0.0956376
s__Faecalibacterium sp934525735	9.25542e-05	0.0822148
s__Mitsuokella jalaludinii	9.22039e-05	0.0419463
s__Clostridium saudiense	9.21909e-05	0.197987
s__Eubacterium_R sp900539325	9.13038e-05	0.0637584
s__Veillonella sp900549845	9.02164e-05	0.583893
s__Alloprevotella sp900542795	9.01212e-05	0.0134228
s__CAG-307 sp001916215	8.97125e-05	0.0604027
s__Enterobacter kobei	8.94573e-05	0.285235
s__Prevotella copri_B	8.849e-05	0.057047
s__Treponema_D peruense	8.83779e-05	0.00503356
s__Lachnospira sp003451515	8.83633e-05	0.145973
s__Veillonella dispar	8.82738e-05	0.526846
s__Weissella confusa_B	8.76411e-05	0.253356
s__Enterobacter hormaechei	8.74676e-05	0.354027
s__Collinsella bouchesdurhonensis	8.7384e-05	0.15604
s__Anaerostipes rhamnosivorans	8.68133e-05	0.0771812
s__Megasphaera sp934193515	8.67437e-05	0.0100671
s__Lawsonibacter sp900550705	8.67343e-05	0.229866
s__Dysosmobacter sp900544105	8.6599e-05	0.228188
s__Anaerostipes hadrus_A	8.65541e-05	0.151007
s__Anaerostipes caccae	8.6499e-05	0.112416
s__UMGS2037 sp934371505	8.63851e-05	0.0385906
s__Faecousia sp900549705	8.63332e-05	0.0755034
s__Mesosutterella multiformis	8.62166e-05	0.045302
s__Senegalimassilia sp934630815	8.55702e-05	0.442953
s__Comamonas kerstersii	8.54424e-05	0.0604027
s__Blautia_A wexlerae_B	8.52875e-05	0.184564
s__Collinsella sp019414055	8.47218e-05	0.199664
s__Bacteroides sp900556625	8.39976e-05	0.238255
s__Klebsiella michiganensis	8.36488e-05	0.22651
s__g__Collinsella__40054_2#167_bin.2.strict_clean	8.36137e-05	0.142617
s__Faecalibacterium sp900551435	8.33602e-05	0.0654362
s__Limosilactobacillus ingluviei	8.32954e-05	0.0167785
s__Senegalimassilia sp905215325	8.30063e-05	0.419463
s__Scybalousia sp900542735	8.30045e-05	0.033557
s__g__Collinsella__47660_4#43_clean_bin.14.permissive_cleaned	8.297e-05	0.134228
s__RUG410 sp900769705	8.29434e-05	0.0201342
s__Citrobacter freundii	8.28818e-05	0.243289
s__Copromonas sp900066055	8.17224e-05	0.147651
s__Streptococcus parasanguinis	8.1273e-05	0.654362
s__Rothia mucilaginosa_A	8.11552e-05	0.818792
s__Agathobacter sp900546625	8.07736e-05	0.0939597
s__Anaerobutyricum sp934307085	8.04073e-05	0.0469799
s__Phascolarctobacterium_A sp900753045	7.96339e-05	0.0604027
s__Faecalibacterium prausnitzii	7.90293e-05	0.0822148
s__Anaerococcus vaginalis_C	7.89112e-05	0.260067
s__Butyribacter intestini	7.84616e-05	0.0637584
s__Phocaeicola sp019414725	7.83836e-05	0.166107
s__UBA6398 sp003150315	7.8342e-05	0.0503356
s__CAG-317 sp000433215	7.76312e-05	0.0620805
s__UBA7597 sp900542935	7.75642e-05	0.0956376
s__Enterococcus_B lactis	7.74753e-05	0.385906
s__Cryptobacteroides sp000434935	7.74549e-05	0.0184564
s__g__Streptococcus__47660_4#172_clean_bin.1.orig_cleaned	7.7267e-05	0.582215
s__Treponema_D succinifaciens	7.72253e-05	0.0033557
s__CAG-45 sp000438375	7.71669e-05	0.0604027
s__Anaerotignum sp905214825	7.70881e-05	0.192953
s__Streptococcus parasanguinis_C	7.69514e-05	0.644295
s__Ruminiclostridium_E siraeum	7.60968e-05	0.0939597
s__Blautia_A sp900066355	7.59483e-05	0.137584
s__Coprobacter fastidiosus	7.58736e-05	0.0436242
s__Lawsonibacter sp900549405	7.57079e-05	0.315436
s__Clostridium sp900769625	7.44698e-05	0.119128
s__Faecalibacterium sp934511465	7.4347e-05	0.0503356
s__Dysosmobacter sp900542115	7.41428e-05	0.197987
s__Citrobacter portucalensis	7.40716e-05	0.16443
s__Parabacteroides massiliensis	7.3316e-05	0.0687919
s__CAG-170 sp000436735	7.28256e-05	0.0654362
s__Dialister sp934178345	7.25607e-05	0.0520134
s__Streptococcus parasanguinis_E	7.25134e-05	0.64094
s__Schaedlerella sp934435195	7.19406e-05	0.115772
s__Helicobacter_C cinaedi	7.17922e-05	0.0654362
s__Phocaeicola massiliensis	7.13522e-05	0.0218121
s__ER4 sp900550165	7.12542e-05	0.208054
s__Gemmiger sp900540595	7.11365e-05	0.151007
s__g__Collinsella__40054_2#65_bin.12.strict_clean	7.1115e-05	0.167785
s__CAG-196 sp900553895	7.03329e-05	0.0234899
s__Escherichia fergusonii	7.03225e-05	0.281879
s__Veillonella sp900766125	7.02957e-05	0.563758
s__Alistipes senegalensis	7.02291e-05	0.100671
s__CAG-353 sp900066885	7.00841e-05	0.0251678
s__Kluyvera sichuanensis	6.94997e-05	0.159396
s__Faecousia sp900547405	6.91135e-05	0.0755034
s__CAG-274 sp900545305	6.90182e-05	0.0687919
s__VUNA01 sp002299625	6.86827e-05	0.0536913
s__Streptococcus parasanguinis_P	6.85183e-05	0.672819
s__CAG-103 sp900317855	6.83764e-05	0.129195
s__Phocaeicola coprophilus	6.83395e-05	0.0268456
s__Vescimonas sp900547745	6.82153e-05	0.0503356
s__Senegalimassilia sp934636665	6.80915e-05	0.442953
s__g__Collinsella__39923_4#52_bin.1.strict_clean	6.80562e-05	0.147651
s__Haemophilus_D sp905205995	6.76387e-05	0.577181
s__Streptococcus sp001813295	6.7424e-05	0.52349
s__Caecibacter sp003467125	6.69731e-05	0.0419463
s__g__Collinsella__47542_1#106_clean_bin.19.orig_cleaned	6.65234e-05	0.16443
s__g__Pauljensenia__47660_4#177_clean_bin.24.orig_cleaned	6.62823e-05	0.401007
s__Ruminococcus_E sp905215855	6.61778e-05	0.105705
s__Enterocloster clostridioformis	6.60572e-05	0.137584
s__Streptococcus parasanguinis_K	6.59703e-05	0.364094
s__Gemmiger sp900540775	6.5862e-05	0.0889262
s__Streptococcus parasanguinis_L	6.55538e-05	0.684564
s__UBA10281 sp900767885	6.53375e-05	0.0604027
s__Dialister hominis	6.5298e-05	0.045302
s__Collinsella sp934630375	6.51178e-05	0.239933
s__Streptococcus sp024295625	6.51133e-05	0.70302
s__Veillonella sp934202215	6.48273e-05	0.501678
s__g__Collinsella__38222_6#6_bin.15.strict_clean	6.47844e-05	0.288591
s__Vescimonas sp900545495	6.44362e-05	0.0520134
s__UMGS1663 sp934153805	6.43375e-05	0.0151007
s__Streptococcus sp934215455	6.43103e-05	0.459732
s__Lachnospira sp003537285	6.39392e-05	0.139262
s__g__Collinsella__38353_3#19_bin.15.permissive_clean	6.35262e-05	0.151007
s__Phascolarctobacterium_A sp900551335	6.3497e-05	0.0251678
s__Prevotella sp002251295	6.34728e-05	0.00671141
s__Weissella cibaria	6.3463e-05	0.263423
s__Streptococcus sp008727815	6.3458e-05	0.654362
s__Angelakisella sp900547385	6.34231e-05	0.0855705
s__Lancefieldella sp902373375	6.34084e-05	0.61745
s__Streptococcus parasanguinis_D	6.34056e-05	0.620805
s__Bacteroides cellulosilyticus	6.33659e-05	0.0755034
s__Bacteroides sp019412865	6.30621e-05	0.340604
s__Phascolarctobacterium_A sp934190775	6.29206e-05	0.0536913
s__Morganella morganii	6.25944e-05	0.186242
s__Streptococcus sp900766505	6.24632e-05	0.667785
s__Streptococcus parasanguinis_J	6.24366e-05	0.644295
s__Bacteroides salyersiae	6.2196e-05	0.0687919
s__g__Collinsella__39923_4#184_bin.7.orig_clean	6.18757e-05	0.130872
s__Cronobacter sakazakii	6.18321e-05	0.256711
s__Streptococcus parasanguinis_M	6.17814e-05	0.674497
s__Choladocola sp018223365	6.17371e-05	0.176174
s__Streptococcus parasanguinis_O	6.15312e-05	0.681208
s__Parolsenella sp900544655	6.10138e-05	0.0520134
s__Fimenecus sp934436505	6.0904e-05	0.0151007
s__Pauljensenia odontolytica_C	6.06271e-05	0.72651
s__Merdisoma sp900553635	6.05242e-05	0.199664
s__Granulicatella sp934193545	6.05192e-05	0.760067
s__Ruminococcus_E sp003438075	6.04206e-05	0.0604027
s__Clostridium paraputrificum	6.01305e-05	0.41443
s__Veillonella rogosae	5.99041e-05	0.488255
s__Succinivibrio sp934218695	5.98098e-05	0.033557
s__Eubacterium limosum	5.96824e-05	0.0939597
s__Eubacterium_F sp900539115	5.95471e-05	0.0385906
s__Lacticaseibacillus rhamnosus	5.95165e-05	0.0671141
s__Streptococcus parasanguinis_B	5.93682e-05	0.70302
s__Wujia sp022174665	5.91711e-05	0.11745
s__CAG-793 sp000433915	5.91471e-05	0.0251678
s__Cutibacterium avidum	5.91373e-05	0.011745
s__Megasphaera stantonii	5.90456e-05	0.0520134
s__PeH17 sp000435055	5.899e-05	0.0268456
s__Streptococcus sp001813675	5.86542e-05	0.516779
s__14-2 sp012519695	5.86342e-05	0.0352349
s__Haemophilus_A parahaemolyticus	5.8212e-05	0.317114
s__Eubacterium_R coprostanoligenes	5.81088e-05	0.0151007
s__CAG-605 sp934098565	5.7751e-05	0.0369128
s__Lentihominibacter sp900066305	5.75765e-05	0.17953
s__Leuconostoc sp900554745	5.69161e-05	0.151007
s__Phocaeicola sp000434735	5.6846e-05	0.0520134
s__Enterobacter cloacae_M	5.67191e-05	0.251678
s__Agathobacter sp934365945	5.66469e-05	0.0838926
s__f__CAG-274__47680_3#24_clean_bin.21.permissive_cleaned	5.66217e-05	0.14094
s__Helicobacter_D pullorum	5.6346e-05	0.0285235
s__Hungatella effluvii	5.60607e-05	0.307047
s__Streptococcus parasanguinis_G	5.60463e-05	0.536913
s__Prevotella sp900553595	5.60135e-05	0.0318792
s__Acidaminococcus sp000437815	5.60055e-05	0.0318792
s__Pauljensenia sp000278725	5.59883e-05	0.298658
s__UBA3789 sp900543055	5.55212e-05	0.0318792
s__Rothia sp015265375	5.5398e-05	0.753356
s__Phocaeicola sp019414665	5.53945e-05	0.221477
s__Acidaminococcus massiliensis	5.48975e-05	0.045302
s__Haemophilus haemolyticus	5.47479e-05	0.513423
s__Merdisoma sp934373375	5.4667e-05	0.209732
s__Brachyspira sp934747485	5.45295e-05	0.0352349
s__CAG-303 sp000437755	5.42546e-05	0.0687919
s__Streptococcus sp902373455	5.41605e-05	0.776846
s__Granulicatella adiacens_A	5.40204e-05	0.760067
s__Collinsella sp934655835	5.40048e-05	0.231544
s__CAG-269 sp900552555	5.38619e-05	0.033557
s__Agathobacter sp900550545	5.37625e-05	0.0553691
s__Collinsella sp019041915	5.3627e-05	0.278523
s__CAG-603 sp900066105	5.35439e-05	0.0385906
s__Lacticaseibacillus paracasei	5.34227e-05	0.0637584
s__g__Collinsella__47660_4#176_clean_bin.2.permissive_cleaned	5.33278e-05	0.137584
s__Holdemanella sp934754935	5.32379e-05	0.0838926
s__Evtepia gabavorous	5.31705e-05	0.0503356
s__CAG-605 sp000433475	5.30883e-05	0.0486577
s__Lactobacillus delbrueckii	5.29395e-05	0.110738
s__Bacteroides finegoldii	5.29075e-05	0.104027
s__Streptococcus sp000448565	5.28183e-05	0.629195
s__Phascolarctobacterium_A succinatutens_A	5.25962e-05	0.0687919
s__Turicibacter bilis	5.23545e-05	0.27349
s__Helicobacter_C magdeburgensis	5.22841e-05	0.0033557
s__Streptococcus mutans	5.21805e-05	0.154362
s__CAG-170 sp900553545	5.20424e-05	0.129195
s__Blautia_A sp900066145	5.18324e-05	0.0671141
s__Gemmiger sp934502625	5.15773e-05	0.0604027
s__Clostridium cuniculi	5.13876e-05	0.194631
s__Streptococcus alactolyticus	5.00643e-05	0.152685
s__g__Collinsella__47660_4#6_clean_bin.3.strict_cleaned	4.98559e-05	0.171141
s__Mediterraneibacter sp934309415	4.98491e-05	0.0704698
s__g__Collinsella__39923_2#3_bin.21.strict_clean	4.96919e-05	0.187919
s__Ventricola sp900548125	4.96065e-05	0.13255
s__Pauljensenia sp018382595	4.95414e-05	0.419463
s__g__Collinsella__39923_4#82_bin.12.permissive_clean	4.93944e-05	0.201342
s__RUG410 sp900553115	4.91007e-05	0.0234899
s__Phocaeicola barnesiae	4.90637e-05	0.0285235
s__CAG-533 sp000434495	4.895e-05	0.0100671
s__Streptococcus parasanguinis_A	4.8908e-05	0.677852
s__Eubacterium_I sp900557275	4.87582e-05	0.191275
s__CAG-390 sp000437015	4.83338e-05	0.045302
s__Faecalibacterium sp934533135	4.82689e-05	0.0587248
s__CAG-448 sp003150135	4.8184e-05	0.0369128
s__Enterobacter asburiae_B	4.76848e-05	0.303691
s__Faecalibacterium sp934525845	4.7664e-05	0.0436242
s__g__Collinsella__47680_3#41_clean_bin.22.strict_cleaned	4.76225e-05	0.208054
s__Haemophilus_D parainfluenzae_O	4.76221e-05	0.310403
s__Collinsella sp934654835	4.75976e-05	0.288591
s__Klebsiella africana	4.75799e-05	0.387584
s__Klebsiella ornithinolytica	4.75383e-05	0.0872483
s__Streptococcus parasanguinis_I	4.73588e-05	0.411074
s__Roseburia sp900756925	4.72062e-05	0.144295
s__Parasutterella gallistercoris	4.7145e-05	0.0604027
s__Streptococcus parasanguinis_F	4.71313e-05	0.577181
s__SFJ001 sp934513685	4.71241e-05	0.033557
s__Eubacterium_F sp000433735	4.69253e-05	0.0520134
s__Choladousia sp902363135	4.68402e-05	0.137584
s__Fusicatenibacter sp900772675	4.66071e-05	0.231544
s__g__Collinsella__40054_2#68_bin.13.strict_clean	4.6567e-05	0.122483
s__Clostridium sp934754925	4.5989e-05	0.285235
s__Lachnospira sp900545725	4.58971e-05	0.0973154
s__Anaerotruncus colihominis	4.58926e-05	0.206376
s__Paraprevotella clara	4.58723e-05	0.0486577
s__URXU01 sp900545025	4.57335e-05	0.0151007
s__Granulicatella sp916049935	4.53937e-05	0.761745
s__WG-1 sp900539665	4.53545e-05	0.00671141
s__Collinsella sp900542825	4.52787e-05	0.154362
s__Ligilactobacillus agilis	4.4929e-05	0.0268456
s__ER4 sp900552015	4.48232e-05	0.172819
s__Roseburia_A sp934359535	4.474e-05	0.011745
s__g__Sutterella__47660_4#31_clean_bin.2.strict_cleaned	4.46997e-05	0.033557
s__Vescimonas sp900554275	4.4629e-05	0.0503356
s__Dorea_A sp900550865	4.45323e-05	0.115772
s__Holdemanella sp900754615	4.4384e-05	0.0704698
s__Prevotella sp022732315	4.41856e-05	0.0285235
s__Bacteroides intestinalis	4.41257e-05	0.0822148
s__NHYM01 sp003364295	4.38195e-05	0.00167785
s__Lactiplantibacillus plantarum	4.357e-05	0.090604
s__Streptococcus parasanguinis_N	4.33903e-05	0.526846
s__Haemophilus quentini	4.27697e-05	0.493289
s__Duodenibacillus sp900544255	4.24782e-05	0.0687919
s__g__Collinsella__39907_1#64_bin.33.strict_clean	4.22357e-05	0.161074
s__Weizmannia coagulans	4.21876e-05	0.0033557
s__CAG-302 sp900543825	4.21112e-05	0.00838926
s__CAG-353 sp900768995	4.20929e-05	0.0218121
s__Dysosmobacter sp900544615	4.20699e-05	0.194631
s__Prevotella salivae	4.20644e-05	0.0536913
s__Faecalibacterium sp934503275	4.17386e-05	0.0469799
s__Haemophilus_A paraphrohaemolyticus	4.1513e-05	0.330537
s__Phocaeicola_A sp900291465	4.13271e-05	0.107383
s__Holdemanella sp003458715	4.12561e-05	0.112416
s__Prevotella pectinovora	4.1255e-05	0.0151007
s__CAG-238 sp900542245	4.11199e-05	0.102349
s__Pauljensenia sp916719935	4.10606e-05	0.75
s__g__Collinsella__47660_4#118_clean_bin.21.strict_cleaned	4.09446e-05	0.229866
s__Bacteroides sp900552405	4.07865e-05	0.130872
s__Alistipes_A sp900539755	4.06876e-05	0.0469799
s__Limosilactobacillus reuteri	4.06476e-05	0.0671141
s__UBA1221 sp900770525	4.06408e-05	0.033557
s__Phocaeicola plebeius	4.06041e-05	0.100671
s__Bariatricus sp905216215	4.04318e-05	0.130872
s__g__Streptococcus__47660_4#143_clean_bin.1.strict_cleaned	4.0327e-05	0.305369
s__CAG-449 sp900551385	4.01844e-05	0.15604
s__Butyricimonas virosa	3.98422e-05	0.115772
s__Staphylococcus aureus	3.98408e-05	0.233221
s__Haemophilus haemolyticus_I	3.98357e-05	0.501678
s__g__Hungatella_A__39923_2#170_bin.14.orig_clean	3.97579e-05	0.11745
s__Phocaeicola faecicola	3.97177e-05	0.0704698
s__CAG-269 sp000438255	3.96053e-05	0.0788591
s__Peptoniphilus_A harei	3.9505e-05	0.330537
s__Ruminococcus_C sp000980705	3.93642e-05	0.0788591
s__SFHR01 sp934271525	3.93572e-05	0.00671141
s__Alloprevotella sp015257125	3.8766e-05	0.0033557
s__Holdemanella sp003436425	3.87009e-05	0.0822148
s__Wujia sp900539705	3.82564e-05	0.0671141
s__Actinomyces oris_C	3.81447e-05	0.645973
s__g__Collinsella__47542_1#102_clean_bin.2.strict_cleaned	3.80433e-05	0.162752
s__Streptococcus mitis_AQ	3.80375e-05	0.723154
s__Parabacteroides johnsonii	3.75579e-05	0.100671
s__Sellimonas intestinalis	3.75187e-05	0.0369128
s__Aphodocola sp900547225	3.73665e-05	0.0604027
s__g__Collinsella__47542_1#96_clean_bin.34.strict_cleaned	3.73079e-05	0.159396
s__UBA3402 sp003478355	3.68708e-05	0.0889262
s__CAG-266 sp944390935	3.68497e-05	0.011745
s__Limivivens sp905214955	3.68031e-05	0.189597
s__Lactobacillus delbrueckii_B	3.66972e-05	0.0654362
s__Blautia_A sp900551715	3.65247e-05	0.166107
s__g__Collinsella__47542_1#140_clean_bin.14.orig_cleaned	3.648e-05	0.134228
s__Blautia_A sp000285855	3.648e-05	0.0889262
s__Streptococcus mitis_P	3.64148e-05	0.713087
s__UBA4248 sp004554395	3.63633e-05	0.00167785
s__Helicobacter_F sp002287135	3.6278e-05	0.011745
s__Oribacterium sp900770445	3.62443e-05	0.0268456
s__o__UBA3830__38353_3#12_bin.15.strict_clean	3.6199e-05	0.00838926
s__g__Collinsella__39907_1#60_bin.14.orig_clean	3.61586e-05	0.167785
s__CAG-266 sp000436095	3.61178e-05	0.0285235
s__Stercorousia sp900556295	3.58949e-05	0.0436242
s__Faecalimonas umbilicata	3.54956e-05	0.0553691
s__CAG-345 sp000433315	3.52906e-05	0.0520134
s__UBA738 sp003522945	3.48973e-05	0.0889262
s__g__Duodenibacillus__38222_6#10_bin.6.orig_clean	3.48811e-05	0.00167785
s__CAG-170 sp900549635	3.42403e-05	0.0620805
s__CAG-194 sp000432915	3.40138e-05	0.0318792
s__UBA10281 sp900556195	3.37036e-05	0.0285235
s__Ruminococcus_C sp000437175	3.36796e-05	0.0352349
s__g__Neisseria__39907_1#61_bin.25.orig_clean	3.35338e-05	0.290268
s__Prevotella sp900548195	3.35021e-05	0.00167785
s__Haemophilus_D parainfluenzae_J	3.34236e-05	0.508389
s__Flemingibacterium sp900546315	3.33844e-05	0.135906
s__g__Collinsella__38222_8#8_bin.7.permissive_clean	3.32793e-05	0.157718
s__Proteus mirabilis	3.32646e-05	0.0889262
s__Lactobacillus amylovorus	3.30864e-05	0.0788591
s__CAG-269 sp000431335	3.28728e-05	0.0486577
s__Salmonella enterica	3.27607e-05	0.0318792
s__Faecousia sp900544405	3.27461e-05	0.144295
s__Ligilactobacillus sp900765635	3.27457e-05	0.057047
s__Butyribacter hominis	3.24558e-05	0.0369128
s__Faecousia sp900544945	3.21795e-05	0.0671141
s__Phil1 sp001940855	3.20808e-05	0.0167785
s__Eubacterium_R sp900540235	3.19129e-05	0.033557
s__Escherichia sp004211955	3.19055e-05	0.221477
s__Peptoniphilus_A gorbachii	3.18871e-05	0.196309
s__Eubacterium_I sp900546495	3.18798e-05	0.0922819
s__g__Collinsella__47660_4#145_clean_bin.15.strict_cleaned	3.18245e-05	0.144295
s__g__Collinsella__47542_1#126_clean_bin.1.orig_cleaned	3.15946e-05	0.14094
s__Roseburia sp900550935	3.15205e-05	0.0184564
s__Escherichia sp005843885	3.15048e-05	0.280201
s__Faecalibacterium sp934553285	3.15043e-05	0.0419463
s__Alistipes communis	3.13706e-05	0.124161
s__g__Collinsella__40054_2#180_bin.31.strict_clean	3.13014e-05	0.162752
s__g__Collinsella__47542_1#115_clean_bin.16.strict_cleaned	3.10796e-05	0.192953
s__Aphodocola sp000434835	3.10602e-05	0.045302
s__Faecousia sp900540635	3.10045e-05	0.0654362
s__Haemophilus influenzae	3.09959e-05	0.177852
s__Oliverpabstia sp934359255	3.09344e-05	0.17953
s__Streptococcus mitis_K	3.09111e-05	0.736577
s__Leuconostoc falkenbergense	3.08732e-05	0.0855705
s__Marvinbryantia sp900066075	3.08253e-05	0.090604
s__CAG-882 sp000435595	3.06317e-05	0.0503356
s__Ruminococcus_C sp000437255	3.05119e-05	0.057047
s__Ventrimonas sp003506385	3.04643e-05	0.0838926
s__Gordonibacter pamelaeae	3.03936e-05	0.327181
s__Kluyvera georgiana_A	3.03232e-05	0.17953
s__UBA10281 sp000437515	3.0293e-05	0.057047
s__Mesosutterella massiliensis	3.0261e-05	0.0201342
s__Paratractidigestivibacter sp905215465	3.0204e-05	0.177852
s__CAG-465 sp000433755	3.01692e-05	0.0302013
s__Butyricicoccus pullicaecorum	3.00297e-05	0.0956376
s__Phocaeicola sartorii	2.98295e-05	0.130872
s__Helicobacter_F avicola	2.98112e-05	0.0134228
s__Paraclostridium sordellii	2.97984e-05	0.0654362
s__Streptococcus mitis_AR	2.97518e-05	0.555369
s__Haemophilus haemolyticus_J	2.96485e-05	0.432886
s__Rothia mucilaginosa	2.95991e-05	0.744966
s__g__Parabacteroides__47542_1#14_clean_bin.1.orig_cleaned	2.93842e-05	0.0151007
s__Anaerotardibacter sp000436075	2.92991e-05	0.119128
s__Megamonas gallistercoris	2.91786e-05	0.0251678
s__Bacteroides zhangwenhongii	2.90564e-05	0.0788591
s__Thomasclavelia sp000508865	2.89585e-05	0.0922819
s__g__Anaerostipes__38353_3#32_bin.13.permissive_clean	2.89371e-05	0.0788591
s__UMGS1279 sp900550315	2.87147e-05	0.0402685
s__Peptostreptococcus anaerobius	2.85796e-05	0.206376
s__Parabacteroides sp014287585	2.85717e-05	0.0687919
s__UBA1436 sp900541355	2.8563e-05	0.011745
s__Blautia_A sp934426285	2.84931e-05	0.182886
s__RUG572 sp900547945	2.84853e-05	0.00167785
s__Ruminococcus_E bromii	2.83764e-05	0.100671
s__Haemophilus haemolyticus_G	2.83386e-05	0.437919
s__Enterocloster aldenensis	2.83311e-05	0.0973154
s__Akkermansia sp900545155	2.83213e-05	0.0100671
s__Alloprevotella sp900543155	2.82408e-05	0.011745
s__Streptococcus oralis_BN	2.8135e-05	0.729866
s__Streptococcus sp905221455	2.81193e-05	0.528523
s__Marvinbryantia sp934408725	2.80688e-05	0.0872483
s__Streptococcus mitis_D	2.80379e-05	0.506711
s__Anaerobiospirillum succiniciproducens	2.80261e-05	0.0167785
s__Corynebacterium propinquum	2.80257e-05	0.105705
s__Citrobacter werkmanii	2.79575e-05	0.134228
s__HGM12814 sp900770165	2.78944e-05	0.0503356
s__UMGS902 sp934467415	2.76797e-05	0.0151007
s__Yersinia enterocolitica	2.76045e-05	0.0033557
s__g__Collinsella__39923_4#67_bin.8.orig_clean	2.74949e-05	0.229866
s__CAG-269 sp905213875	2.73765e-05	0.0687919
s__Weissella paramesenteroides	2.72544e-05	0.0419463
s__UMGS1071 sp900542375	2.71308e-05	0.154362
s__Eubacterium_R sp900539775	2.70843e-05	0.0201342
s__Kluyvera ascorbata	2.70697e-05	0.182886
s__Streptococcus mitis_A	2.69533e-05	0.67953
s__Blautia_A sp900548245	2.68864e-05	0.033557
s__UBA737 sp900549055	2.68687e-05	0.0805369
s__UBA7597 sp003448195	2.68345e-05	0.0872483
s__Veillonella sp900552445	2.67691e-05	0.357383
s__Alistipes sp900541585	2.65725e-05	0.130872
s__Gemmiger sp900556255	2.65468e-05	0.0654362
s__ER4 sp934636865	2.62844e-05	0.112416
s__CAG-170 sp002404795	2.6275e-05	0.0687919
s__Streptococcus sp905221035	2.61626e-05	0.627517
s__Pauljensenia sp019425105	2.61242e-05	0.610738
s__Vescimonas sp934597345	2.61177e-05	0.0604027
s__Rothia sp001808955	2.6072e-05	0.521812
s__UBA11524 sp000437595	2.60209e-05	0.0503356
s__Enterococcus_G italicus	2.59025e-05	0.0855705
s__Butyribacter sp003529475	2.5797e-05	0.0436242
s__Clostridium sp900539375	2.57455e-05	0.0218121
s__Alistipes_A pullistercoris	2.56436e-05	0.0620805
s__Treponema_D sp900541945	2.56372e-05	0.00671141
s__Faecalibacterium sp934526125	2.5508e-05	0.0285235
s__UMGS1338 sp900550805	2.54346e-05	0.0385906
s__Enterobacter mori	2.53805e-05	0.157718
s__Eubacterium_G sp900764695	2.53649e-05	0.102349
s__Parabacteroides distasonis_A	2.53228e-05	0.265101
s__Faecalibacterium sp934525325	2.52175e-05	0.0989933
s__CAG-510 sp000434615	2.52016e-05	0.0469799
s__UBA10281 sp900767815	2.49052e-05	0.0872483
s__Bifidobacterium ruminantium	2.48343e-05	0.0184564
s__UBA1417 sp934643185	2.47602e-05	0.135906
s__Streptococcus pseudopneumoniae_H	2.47593e-05	0.620805
s__Oribacterium sp004554245	2.47154e-05	0.0268456
s__Ventricola sp900542395	2.46712e-05	0.134228
s__Prevotella sp900557405	2.46446e-05	0.0167785
s__Lentihominibacter sp934281605	2.4624e-05	0.181208
s__Beduini sp900550005	2.45024e-05	0.0872483
s__Peptoniphilus_A senegalensis	2.43336e-05	0.427852
s__Streptococcus anginosus	2.4256e-05	0.411074
s__Fusobacterium periodonticum_D	2.42138e-05	0.159396
s__UMGS1590 sp900552455	2.41395e-05	0.0419463
s__Providencia rettgeri_F	2.41318e-05	0.0201342
s__Bacteroides intestinigallinarum	2.40996e-05	0.172819
s__Escherichia sp002965065	2.40772e-05	0.231544
s__Collinsella sp900550965	2.4068e-05	0.276846
s__g__Collinsella__39907_1#38_bin.10.orig_clean	2.40516e-05	0.0721477
s__Holdemanella porci	2.40003e-05	0.115772
s__1XD42-69 sp014287635	2.3989e-05	0.057047
s__Blautia_A intestinalis	2.39497e-05	0.0956376
s__g__Collinsella__47542_1#107_clean_bin.9.orig_cleaned	2.39452e-05	0.157718
s__Helicobacter_D sp022766795	2.37177e-05	0.00838926
s__CAG-475 sp000434435	2.36369e-05	0.0134228
s__Streptococcus sp903645285	2.35167e-05	0.704698
s__Blautia_A luti	2.34606e-05	0.0704698
s__CAG-95 sp000438155	2.34241e-05	0.0822148
s__CAG-449 sp905204225	2.33233e-05	0.124161
s__UBA1394 sp900554975	2.32382e-05	0.0419463
s__Rothia mucilaginosa_B	2.32039e-05	0.724832
s__Streptococcus sp905221105	2.31634e-05	0.684564
s__Streptococcus sp901875575	2.30969e-05	0.629195
s__Eggerthella guodeyinii	2.30921e-05	0.317114
s__Veillonella tobetsuensis	2.30424e-05	0.42953
s__Cryptobacteroides sp934700615	2.29682e-05	0.0201342
s__Streptococcus sp013277415	2.29659e-05	0.598993
s__Streptococcus sp905221065	2.29214e-05	0.672819
s__Eubacterium_F sp934322085	2.28598e-05	0.0637584
s__Streptococcus sp905221545	2.28502e-05	0.644295
s__Bacteroides rodentium	2.27111e-05	0.204698
s__Streptococcus sp905221125	2.26615e-05	0.647651
s__Streptococcus sp905221215	2.25292e-05	0.684564
s__Blautia_A sp003477525	2.25268e-05	0.0587248
s__Streptococcus pseudopneumoniae_G	2.25033e-05	0.602349
s__UBA3789 sp934140575	2.24613e-05	0.00503356
s__Streptococcus sp905221505	2.23984e-05	0.671141
s__Streptococcus sp905221245	2.23171e-05	0.604027
s__Streptococcus xiaochunlingii	2.22582e-05	0.5
s__RF16 sp900556095	2.22387e-05	0.00167785
s__Catenibacterium sp900540685	2.21457e-05	0.0553691
s__CAG-269 sp934130975	2.21375e-05	0.0486577
s__Streptococcus sp902363395	2.21056e-05	0.454698
s__Onthomonas sp934565425	2.20973e-05	0.0536913
s__Enterobacter cloacae_Q	2.20851e-05	0.16443
s__UMGS995 sp900769695	2.20485e-05	0.0201342
s__g__Aphodousia__39907_1#1_bin.10.strict_clean	2.20226e-05	0.00503356
s__Streptococcus sp905221095	2.20202e-05	0.661074
s__Streptococcus pneumoniae_E	2.19386e-05	0.625839
s__Streptococcus mitis_AK	2.1834e-05	0.704698
s__UMGS1820 sp905201285	2.18037e-05	0.0520134
s__Bacteroides sp900557355	2.16629e-05	0.189597
s__Faecalibacterium sp934501115	2.16281e-05	0.0536913
s__Vescimonas sp900551355	2.15941e-05	0.0956376
s__Neisseria perflava_A	2.15803e-05	0.281879
s__Brachyspira aalborgi	2.13486e-05	0.00671141
s__Klebsiella aerogenes	2.12709e-05	0.248322
s__Roseburia sp900542495	2.12215e-05	0.10906
s__Streptococcus sp905221375	2.1187e-05	0.676174
s__Pauljensenia radingae_A	2.11786e-05	0.0234899
s__Streptococcus mitis_J	2.11225e-05	0.662752
s__Streptococcus sp943912555	2.11203e-05	0.610738
s__Scatovivens sp934140005	2.1012e-05	0.0234899
s__Streptococcus mitis	2.09659e-05	0.672819
s__Butyribacter sp003524945	2.09412e-05	0.0755034
s__Streptococcus mitis_C	2.09008e-05	0.634228
s__Streptococcus pneumoniae_C	2.08659e-05	0.555369
s__Cryptobacteroides sp900545245	2.0856e-05	0.00503356
s__Enterobacter bugandensis	2.08531e-05	0.258389
s__Ventrenecus sp934085675	2.08436e-05	0.0805369
s__Finegoldia magna	2.08266e-05	0.501678
s__Butyricimonas faecalis	2.08206e-05	0.0469799
s__Limosilactobacillus antri	2.0799e-05	0.0167785
s__Pseudobutyricicoccus sp003477405	2.05807e-05	0.0956376
s__Acidaminococcus sp905215645	2.05556e-05	0.0318792
s__Sutterella seckii_A	2.05279e-05	0.129195
s__Eubacterium_R sp900548085	2.05236e-05	0.0956376
s__Dysosmobacter welbionis	2.05007e-05	0.057047
s__RUG131 sp900549975	2.04365e-05	0.0201342
s__Bulleidia sp934754415	2.03364e-05	0.0251678
s__Fimimonas sp003537755	2.03335e-05	0.0151007
s__Acetatifactor sp900760705	2.02269e-05	0.13255
s__Streptococcus sp013277515	2.01858e-05	0.676174
s__CAG-269 sp934120675	2.01447e-05	0.0553691
s__Streptococcus pseudopneumoniae_P	1.98998e-05	0.577181
s__Streptococcus sp001810785	1.98896e-05	0.635906
s__Fimadaptatus sp900553645	1.97354e-05	0.0855705
s__Streptococcus pneumoniae_B	1.95927e-05	0.624161
s__Pararoseburia lenta	1.9565e-05	0.0587248
s__Blautia_A sp900120195	1.94967e-05	0.0553691
s__Streptococcus mitis_BA	1.94913e-05	0.573826
s__Parabacteroides gordonii	1.94669e-05	0.0687919
s__Veillonella sp900757715	1.94361e-05	0.154362
s__Collinsella sp023441725	1.94335e-05	0.41443
s__Eubacterium_F sp934316845	1.94085e-05	0.0402685
s__Streptococcus mitis_BL	1.93299e-05	0.605705
s__UBA1829 sp002338895	1.92289e-05	0.0167785
s__Phascolarctobacterium_A sp934234275	1.91966e-05	0.0654362
s__Streptococcus sp013276795	1.91307e-05	0.651007
s__Prevotella sp900770515	1.91162e-05	0.033557
s__Nanosynbacter sp900555425	1.91141e-05	0.293624
s__Bilophila sp900550745	1.911e-05	0.234899
s__Enterobacter asburiae	1.91018e-05	0.285235
s__Streptococcus mitis_I	1.90483e-05	0.567114
s__Streptococcus sp019448285	1.9018e-05	0.595638
s__Agathobacter sp934359755	1.89973e-05	0.0167785
s__UMGS1585 sp900766355	1.89813e-05	0.0167785
s__Streptococcus mitis_H	1.89155e-05	0.604027
s__Adlercreutzia equolifaciens	1.89003e-05	0.120805
s__CAG-115 sp003531585	1.8831e-05	0.0503356
s__Dolosigranulum pigrum	1.8816e-05	0.293624
s__Pseudoflavonifractor_A gallinarum	1.87921e-05	0.157718
s__Faecalibacterium sp934525405	1.86897e-05	0.0671141
s__Fusobacterium_A varium	1.86678e-05	0.0872483
s__Streptococcus mitis_AT	1.86341e-05	0.612416
s__Eggerthella timonensis	1.86198e-05	0.100671
s__Streptococcus pneumoniae_A	1.86119e-05	0.533557
s__CAG-882 sp934351925	1.85591e-05	0.0318792
s__CAG-196 sp934747325	1.85374e-05	0.0302013
s__Sutterella sp905198475	1.84898e-05	0.0167785
s__Bacteroides luhongzhouii	1.84527e-05	0.288591
s__Anaerotignum lactatifermentans	1.84343e-05	0.0218121
s__Collinsella sp934654775	1.83924e-05	0.302013
s__Varibaculum cambriense_A	1.83827e-05	0.248322
s__CAG-245 sp000434195	1.83344e-05	0.0285235
s__CAG-269 sp900556345	1.83268e-05	0.0872483
s__Nanogingivalis sp934717805	1.82922e-05	0.194631
s__CAG-269 sp900551615	1.82037e-05	0.0939597
s__W0P33-017 sp934351445	1.81553e-05	0.0671141
s__Enterobacter chengduensis	1.81295e-05	0.199664
s__Stercorousia sp934717855	1.80243e-05	0.0201342
s__Streptococcus sp020089495	1.80231e-05	0.649329
s__Blautia_A sp934424575	1.79623e-05	0.144295
s__Allisonella pneumosinta	1.79578e-05	0.219799
s__UBA11774 sp003507655	1.78184e-05	0.0755034
s__UMGS1820 sp900555375	1.77838e-05	0.0419463
s__Tidjanibacter inops	1.77375e-05	0.0553691
s__Streptococcus mitis_E	1.77166e-05	0.61745
s__HGM13010 sp905214605	1.76452e-05	0.057047
s__Selenomonas_A sp900769615	1.76437e-05	0.0100671
s__Collinsella sp900541745	1.75824e-05	0.370805
s__Desulfovibrio piger	1.75729e-05	0.105705
s__Collinsella sp900554135	1.7548e-05	0.377517
s__Lentihominibacter sp905193765	1.7462e-05	0.0687919
s__Prevotella sp000467895	1.74515e-05	0.0352349
s__Streptococcus mitis_BV	1.74094e-05	0.560403
s__Faecousia sp000434635	1.72928e-05	0.0687919
s__Collinsella sp900544725	1.72739e-05	0.350671
s__Dysosmobacter sp004553545	1.72557e-05	0.0704698
s__Enterocloster porci	1.71485e-05	0.0503356
s__Butyribacter huaianensis	1.70612e-05	0.0553691
s__Limenecus avicola	1.70534e-05	0.0268456
s__Gemmiger sp900554145	1.69454e-05	0.0385906
s__Clostridium_AQ sp003481775	1.68229e-05	0.0302013
s__Dysosmobacter sp900763685	1.67926e-05	0.090604
s__CAJOJO01 sp014845975	1.67117e-05	0.0184564
s__Streptococcus halitosis	1.66891e-05	0.590604
s__Prevotella copri_D	1.66772e-05	0.033557
s__Streptococcus sp004166885	1.66712e-05	0.483221
s__Collinsella sp900551815	1.66455e-05	0.385906
s__UBA1724 sp900548225	1.66364e-05	0.00167785
s__Corynebacterium aurimucosum_E	1.66354e-05	0.211409
s__HGM13006 sp900756575	1.66319e-05	0.213087
s__Neisseria perflava	1.66201e-05	0.271812
s__Methanobrevibacter_A smithii_A	1.64349e-05	0.00838926
s__Alistipes_A sp900545315	1.63587e-05	0.0352349
s__Coprococcus sp900548215	1.63582e-05	0.0520134
s__F0422 sp003999875	1.63546e-05	0.355705
s__CAG-269 sp934184665	1.63425e-05	0.0503356
s__Streptococcus mitis_BM	1.63166e-05	0.625839
s__Staphylococcus hominis	1.62969e-05	0.219799
s__Actinomyces urogenitalis	1.62855e-05	0.0436242
s__SFIE01 sp004555405	1.62753e-05	0.0134228
s__Cryptobacteroides sp000431015	1.62503e-05	0.0033557
s__Streptococcus mitis_AV	1.62487e-05	0.672819
s__Vescimonas sp900550615	1.62441e-05	0.0755034
s__Clostridium_AP scindens	1.6221e-05	0.0989933
s__Streptococcus mitis_F	1.61866e-05	0.629195
s__Vescimonas sp900555735	1.61803e-05	0.0637584
s__Streptococcus sp905221115	1.61625e-05	0.651007
s__Vescimonas sp900545585	1.61055e-05	0.0805369
s__UBA10281 sp900554485	1.60271e-05	0.0352349
s__RUG410 sp934229625	1.60087e-05	0.0218121
s__Mogibacterium diversum	1.59761e-05	0.276846
s__Streptococcus oralis_W	1.59383e-05	0.463087
s__Streptococcus australis_B	1.59172e-05	0.442953
s__Bacteroides congonensis	1.58866e-05	0.100671
s__g__RUG11200__38353_3#25_bin.6.permissive_clean	1.58856e-05	0.00838926
s__Neisseria subflava_D	1.58839e-05	0.270134
s__Faecalibacterium sp934539245	1.5871e-05	0.0855705
s__CAG-582 sp000435515	1.58704e-05	0.0302013
s__Neisseria subflava_A	1.58146e-05	0.27349
s__Anaerococcus obesiensis	1.58138e-05	0.27349
s__Streptococcus sp900550895	1.57637e-05	0.508389
s__Streptococcus mitis_BR	1.5737e-05	0.610738
s__Anaerotardibacter sp934617065	1.57359e-05	0.104027
s__Vescimonas sp900556015	1.56646e-05	0.0184564
s__Collinsella sp934654795	1.56316e-05	0.348993
s__Collinsella sp900759435	1.56166e-05	0.432886
s__Collinsella sp900754745	1.55413e-05	0.357383
s__Collinsella sp900768265	1.55305e-05	0.295302
s__Streptococcus anginosus_C	1.54808e-05	0.379195
s__UBA10677 sp900762945	1.54178e-05	0.0151007
s__Collinsella sp905209765	1.53466e-05	0.312081
s__Neisseria subflava_B	1.52864e-05	0.184564
s__UBA737 sp900549755	1.5269e-05	0.0889262
s__Collinsella sp900541785	1.50864e-05	0.374161
s__Alistipes excrementavium	1.50311e-05	0.0855705
s__Parolsenella sp900552935	1.50252e-05	0.0402685
s__Collinsella sp934617135	1.50134e-05	0.281879
s__Nanosynbacter sp900555675	1.487e-05	0.283557
s__Merdimonas faecis	1.48554e-05	0.14094
s__Bacteroides_F pectinophilus	1.48275e-05	0.0788591
s__UBA10281 sp021635425	1.48078e-05	0.0654362
s__Collinsella sp900543845	1.48029e-05	0.354027
s__Alloprevotella sp900768625	1.47911e-05	0.00503356
s__Agathobacter sp000434275	1.47011e-05	0.0285235
s__Streptococcus sp019414905	1.46822e-05	0.595638
s__g__Avigastranaerophilus__47542_1#134_clean_bin.1.permissive_cleaned	1.45805e-05	0.0134228
s__UBA6398 sp900550635	1.45215e-05	0.0167785
s__CAG-302 sp001916775	1.44544e-05	0.0436242
s__Collinsella sp900758475	1.43943e-05	0.303691
s__Streptococcus mitis_BJ	1.43667e-05	0.409396
s__Avimicrobium caecorum	1.43188e-05	0.110738
s__Lawsonibacter sp905215425	1.42567e-05	0.119128
s__UBA7173 sp910584365	1.42505e-05	0.00167785
s__Neisseria flavescens_C	1.41957e-05	0.253356
s__Parabacteroides sp900549585	1.41775e-05	0.0385906
s__Prevotella oris	1.41426e-05	0.0721477
s__Lachnoclostridium_B monacensis	1.41072e-05	0.0302013
s__Collinsella stercoripullorum	1.40075e-05	0.0251678
s__Eubacterium_G sp900548465	1.39889e-05	0.0939597
s__Coprococcus sp900767685	1.39594e-05	0.0520134
s__Streptococcus sp934216185	1.39333e-05	0.258389
s__Metalachnospira sp900553995	1.38849e-05	0.0939597
s__UMGS1071 sp934454125	1.38565e-05	0.011745
s__Collinsella sp934630735	1.38509e-05	0.219799
s__SFEL01 sp004557245	1.38363e-05	0.0536913
s__Bifidobacterium merycicum	1.38266e-05	0.0268456
s__Collinsella sp934668695	1.37037e-05	0.298658
s__Finegoldia magna_F	1.36929e-05	0.444631
s__Megamonas sp900556715	1.36622e-05	0.11745
s__Faecalibacterium sp934512105	1.36355e-05	0.0503356
s__Massilimicrobiota merdigallinarum	1.35978e-05	0.0302013
s__Collinsella sp900547835	1.35918e-05	0.442953
s__Collinsella sp900554645	1.35795e-05	0.47651
s__Acetatifactor sp900766575	1.35142e-05	0.0218121
s__Lactobacillus sp944327175	1.34733e-05	0.0536913
s__Bacteroides eggerthii	1.3431e-05	0.0822148
s__CAG-710 sp000432595	1.34174e-05	0.0218121
s__CAG-605 sp934098505	1.34049e-05	0.0184564
s__Choladousia sp902363665	1.33742e-05	0.0604027
s__Butyricimonas faecihominis	1.33595e-05	0.122483
s__Neisseria flavescens_A	1.33446e-05	0.256711
s__UBA4372 sp900543815	1.33295e-05	0.00671141
s__Collinsella sp934668345	1.32879e-05	0.199664
s__Campylobacter_D sp900772495	1.32071e-05	0.0553691
s__Streptococcus sp905221355	1.31993e-05	0.491611
s__Parasutterella sp900552195	1.31986e-05	0.112416
s__Collinsella sp934668875	1.31416e-05	0.270134
s__Mailhella excrementigallinarum	1.3121e-05	0.0419463
s__Bilophila sp902373525	1.30519e-05	0.0302013
s__Enterobacter sp000568095	1.3047e-05	0.261745
s__Acidaminococcus provencensis	1.30461e-05	0.0151007
s__Fusobacterium animalis	1.30185e-05	0.22651
s__Eubacterium_I sp934358495	1.29971e-05	0.186242
s__Collinsella aerofaciens_AJ	1.29943e-05	0.298658
s__Blautia_A sp905209435	1.2994e-05	0.110738
s__Collinsella aerofaciens_AH	1.29909e-05	0.29698
s__CAG-269 sp934120045	1.29599e-05	0.0536913
s__Holdemanella porci_A	1.28916e-05	0.0620805
s__Collinsella sp900759565	1.28697e-05	0.478188
s__Corynebacterium amycolatum	1.28661e-05	0.151007
s__Anaerococcus vaginalis	1.28534e-05	0.384228
s__Acinetobacter nosocomialis	1.28014e-05	0.102349
s__Vescimonas sp900548615	1.27347e-05	0.0402685
s__Collinsella sp934650095	1.27256e-05	0.310403
s__Lawsonella sp018376445	1.27244e-05	0.13255
s__Ellagibacter sp934663775	1.26369e-05	0.0939597
s__Mediterraneibacter excrementipullorum	1.26263e-05	0.0218121
s__Staphylococcus epidermidis	1.26142e-05	0.300336
s__Collinsella sp019414545	1.26099e-05	0.474832
s__Cryptobacteroides sp934725575	1.25969e-05	0.0318792
s__Collinsella sp900542175	1.25776e-05	0.431208
s__Eubacterium_G sp000434315	1.24991e-05	0.0637584
s__Faecalibacterium sp900765105	1.24859e-05	0.0402685
s__Duodenibacillus intestinigallinarum	1.24769e-05	0.0318792
s__Blautia_A sp900066505	1.24643e-05	0.0620805
s__Corynebacterium sp012837295	1.24631e-05	0.0939597
s__Ruminiclostridium_E sp934462775	1.24058e-05	0.00838926
s__UMGS363 sp900541495	1.23645e-05	0.0285235
s__CAG-269 sp934132805	1.22996e-05	0.0285235
s__Anaerotardibacter sp900553605	1.22917e-05	0.169463
s__Collinsella sp905214905	1.22482e-05	0.442953
s__Collinsella sp934643435	1.22066e-05	0.286913
s__CAG-170 sp902796245	1.22052e-05	0.0604027
s__Coprococcus sp900066115	1.21302e-05	0.0620805
s__Collinsella sp934643145	1.21062e-05	0.278523
s__Haemophilus influenzae_E	1.21034e-05	0.27349
s__Enterococcus_D casseliflavus	1.20817e-05	0.0973154
s__Faecalibacterium sp934540955	1.20747e-05	0.0553691
s__CAG-245 sp900761475	1.20419e-05	0.0671141
s__Blautia_A sp934437695	1.20322e-05	0.142617
s__CAG-177 sp003538135	1.20317e-05	0.0318792
s__Neisseria flavescens_B	1.2028e-05	0.246644
s__CAG-269 sp934149075	1.20184e-05	0.0469799
s__RUG410 sp934277435	1.20178e-05	0.0134228
s__Collinsella sp900555355	1.2008e-05	0.35906
s__Anaerobutyricum sp934317185	1.19318e-05	0.159396
s__Anaerotardibacter sp000435475	1.19122e-05	0.0553691
s__Collinsella sp900547765	1.18539e-05	0.446309
s__Collinsella sp900551625	1.18087e-05	0.449664
s__Pauljensenia turicensis	1.17362e-05	0.182886
s__Collinsella aerofaciens_A	1.16956e-05	0.182886
s__ER4 sp002437735	1.16915e-05	0.102349
s__Collinsella sp934650975	1.16775e-05	0.243289
s__CAG-115 sp003507295	1.16485e-05	0.0503356
s__UBA6984 sp900550295	1.16323e-05	0.011745
s__CAG-103 sp934591895	1.16166e-05	0.090604
s__Collinsella sp900755005	1.15763e-05	0.352349
s__Enterobacter quasihormaechei	1.1508e-05	0.211409
s__Helicobacter_C japonicus	1.14722e-05	0.00671141
s__Streptococcus gallolyticus	1.14431e-05	0.243289
s__Prevotella sp900548535	1.14032e-05	0.0201342
s__Collinsella sp019419645	1.1388e-05	0.464765
s__Klebsiella oxytoca	1.13482e-05	0.112416
s__Peptoniphilus_A harei_A	1.13283e-05	0.421141
s__Collinsella sp905215275	1.13097e-05	0.219799
s__Collinsella sp019413925	1.12677e-05	0.45302
s__Collinsella sp900547025	1.12621e-05	0.422819
s__Bacteroides stercorirosoris	1.12568e-05	0.0973154
s__Ruminococcus sp900540005	1.12566e-05	0.0671141
s__Catenibacterium sp900540665	1.12531e-05	0.0805369
s__Prevotella histicola	1.12167e-05	0.105705
s__Collinsella sp900545605	1.12012e-05	0.442953
s__Collinsella sp014871665	1.11917e-05	0.491611
s__Paratractidigestivibacter sp003150175	1.11592e-05	0.0503356
s__Collinsella sp900549245	1.11076e-05	0.271812
s__CAG-841 sp000437375	1.11071e-05	0.0167785
s__UBA7597 sp900767195	1.10287e-05	0.0486577
s__RGIG4076 sp905198155	1.10166e-05	0.0167785
s__Collinsella sp934654605	1.09028e-05	0.17953
s__VUNA01 sp934234035	1.08858e-05	0.0167785
s__Collinsella sp900758845	1.0835e-05	0.419463
s__CAG-302 sp934101345	1.08144e-05	0.0100671
s__Collinsella sp934667065	1.07875e-05	0.167785
s__Collinsella sp019414445	1.07833e-05	0.459732
s__Roseburia sp905206195	1.07759e-05	0.0587248
s__Collinsella sp900547125	1.07497e-05	0.441275
s__Collinsella sp900544875	1.06886e-05	0.466443
s__Dialister sp900541485	1.06779e-05	0.15604
s__Thomasclavelia spiroformis	1.066e-05	0.285235
s__Collinsella sp900540855	1.06585e-05	0.377517
s__CAG-274 sp000432155	1.06137e-05	0.0520134
s__Faecousia sp900546075	1.06055e-05	0.0872483
s__Parolsenella sp900543875	1.05445e-05	0.0637584
s__Ventrenecus sp900549625	1.05437e-05	0.0704698
s__Fusobacterium polymorphum	1.05391e-05	0.201342
s__Agathobacter sp900548765	1.0502e-05	0.0167785
s__Collinsella sp900545055	1.0417e-05	0.372483
s__Prevotella sp934204655	1.04121e-05	0.00838926
s__Hominisplanchenecus sp905214675	1.03939e-05	0.0738255
s__Collinsella sp900545905	1.03679e-05	0.399329
s__RUG115 sp900315735	1.0363e-05	0.110738
s__Collinsella sp900544845	1.03444e-05	0.41443
s__CAG-170 sp934613505	1.03348e-05	0.0671141
s__Collinsella sp900542125	1.03053e-05	0.397651
s__Collinsella sp900553345	1.02952e-05	0.416107
s__Collinsella sp934646865	1.02732e-05	0.134228
s__Acetatifactor sp934394515	1.0272e-05	0.144295
s__Collinsella sp019414465	1.02264e-05	0.456376
s__Faecalibacterium hattorii	1.02194e-05	0.0536913
s__Neisseria subflava	1.02062e-05	0.241611
s__Collinsella sp019414045	1.01905e-05	0.416107
s__Collinsella sp019419625	1.0188e-05	0.303691
s__Blautia_A sp934372025	1.01803e-05	0.10906
s__Collinsella sp905214435	1.01795e-05	0.404362
s__Collinsella sp900541065	1.01692e-05	0.441275
s__CAG-269 sp000435535	1.01564e-05	0.0302013
s__UBA3375 sp900551955	1.0141e-05	0.0033557
s__CAG-433 sp000433675	1.01388e-05	0.0234899
s__Limiplasma sp900548145	1.01304e-05	0.0318792
s__Collinsella sp018368345	1.01212e-05	0.360738
s__Pauljensenia sp000466265	1.01177e-05	0.159396
s__Collinsella sp900554155	1.0032e-05	0.276846
s__Acetatifactor sp934394815	1.00295e-05	0.0469799
s__Collinsella sp900541145	1.00089e-05	0.439597
s__Collinsella sp019425015	9.98099e-06	0.354027
s__Phocaeicola sp000432735	9.97892e-06	0.0184564
s__Collinsella aerofaciens_AC	9.9633e-06	0.263423
s__Faecalibacterium sp900772565	9.93417e-06	0.0755034
s__Collinsella sp900541025	9.92273e-06	0.432886
s__Enterobacter dykesii	9.914e-06	0.186242
s__Collinsella sp022728415	9.90686e-06	0.0251678
s__Proteus sp003144505	9.89776e-06	0.0721477
s__Collinsella sp934675795	9.87142e-06	0.431208
s__Bifidobacterium dentium	9.85984e-06	0.0234899
s__Bacteroides cutis	9.84793e-06	0.0503356
s__Collinsella sp905209455	9.83326e-06	0.399329
s__Collinsella sp900540985	9.81857e-06	0.454698
s__Pararoseburia sp900546435	9.80674e-06	0.0503356
s__Collinsella sp019419455	9.80476e-06	0.407718
s__Ruminococcus_E bovis	9.78821e-06	0.0268456
s__Coprobacillus cateniformis	9.78562e-06	0.0469799
s__Collinsella sp900542165	9.74966e-06	0.38255
s__Collinsella sp900544205	9.74895e-06	0.407718
s__Collinsella sp019414325	9.74551e-06	0.41443
s__Lachnoclostridium_B faecipullorum	9.73183e-06	0.0889262
s__Eubacterium_G sp000432355	9.69579e-06	0.0419463
s__Collinsella sp900760385	9.68611e-06	0.47651
s__Collinsella sp900541035	9.64588e-06	0.431208
s__UBA11549 sp900768185	9.60797e-06	0.0234899
s__Clostridioides_A sp002390935	9.58645e-06	0.0033557
s__Collinsella sp902388545	9.57809e-06	0.348993
s__Collinsella sp900756945	9.57399e-06	0.355705
s__g__Parabacteroides__47680_3#18_clean_bin.12.orig_cleaned	9.55374e-06	0.00167785
s__Haemophilus influenzae_D	9.55214e-06	0.280201
s__Collinsella sp019414025	9.54864e-06	0.424497
s__Enterococcus_A raffinosus_A	9.53818e-06	0.199664
s__Collinsella sp900541855	9.52033e-06	0.424497
s__Cryptobacteroides sp900546925	9.48461e-06	0.00838926
s__Collinsella sp900543615	9.47821e-06	0.33557
s__Collinsella sp003459245	9.46757e-06	0.340604
s__Collinsella sp018376905	9.44255e-06	0.379195
s__Collinsella sp934876235	9.40748e-06	0.317114
s__CAG-302 sp000431795	9.40427e-06	0.0234899
s__Aphodocola sp900772415	9.39695e-06	0.0285235
s__Butyribacter sp934320845	9.38837e-06	0.0285235
s__Collinsella sp900542635	9.36927e-06	0.42953
s__Collinsella sp900761995	9.35725e-06	0.313758
s__CAG-245 sp934122035	9.35477e-06	0.0352349
s__Collinsella sp900543505	9.35282e-06	0.338926
s__Faecalicoccus pleomorphus	9.33081e-06	0.0671141
s__Finegoldia magna_H	9.32743e-06	0.29698
s__Collinsella sp019425005	9.31545e-06	0.364094
s__Collinsella sp900543945	9.26767e-06	0.379195
s__Enterobacter asburiae_D	9.24791e-06	0.233221
s__Collinsella sp934654585	9.21849e-06	0.302013
s__Haemophilus aegyptius	9.19752e-06	0.246644
s__V9D3004 sp002349525	9.19525e-06	0.0234899
s__Collinsella aerofaciens_S	9.17965e-06	0.39094
s__Blautia_A sp003474435	9.17776e-06	0.0838926
s__Collinsella sp900548255	9.17019e-06	0.409396
s__Collinsella sp900544755	9.16104e-06	0.347315
s__Collinsella sp900549085	9.15094e-06	0.365772
s__Collinsella sp003436275	9.14915e-06	0.305369
s__Faecalibacterium sp934548045	9.14354e-06	0.0234899
s__Collinsella sp934654625	9.14336e-06	0.0704698
s__Limosilactobacillus gallistercoris	9.13239e-06	0.00671141
s__Alloprevotella sp916438195	9.11133e-06	0.0369128
s__CAG-170 sp905214155	9.10506e-06	0.090604
s__Collinsella sp900540895	9.0919e-06	0.409396
s__Pauljensenia sp902373545	9.06354e-06	0.337248
s__Collinsella sp900540095	9.04748e-06	0.345638
s__Collinsella sp900554465	9.03464e-06	0.389262
s__Caecibacter massiliensis	9.01915e-06	0.0805369
s__Collinsella sp900761615	9.00242e-06	0.40604
s__Collinsella sp900755685	9.00002e-06	0.407718
s__Collinsella sp900541715	8.98993e-06	0.394295
s__CAG-302 sp934162325	8.96507e-06	0.0268456
s__Collinsella sp905214465	8.95343e-06	0.303691
s__Collinsella sp934654765	8.94152e-06	0.166107
s__Collinsella sp014871605	8.93893e-06	0.365772
s__Sutterella sp900762445	8.92782e-06	0.0201342
s__Faecousia sp934589525	8.91978e-06	0.0352349
s__Agathobacter sp934307695	8.9186e-06	0.0201342
s__Collinsella sp900553705	8.91101e-06	0.380872
s__Megamonas hypermegale_A	8.87104e-06	0.00671141
s__Collinsella sp900762015	8.83003e-06	0.372483
s__Streptococcus pyogenes	8.81706e-06	0.191275
s__Muricomes sp000509105	8.81544e-06	0.0251678
s__Collinsella sp019425045	8.81354e-06	0.322148
s__Collinsella sp905215385	8.7845e-06	0.364094
s__Collinsella sp900556415	8.73389e-06	0.387584
s__Collinsella sp900539735	8.70629e-06	0.389262
s__CAG-269 sp001915995	8.67963e-06	0.0503356
s__CAG-605 sp934101445	8.67707e-06	0.0234899
s__Collinsella sp900545665	8.63329e-06	0.412752
s__Enterocloster clostridioformis_A	8.63326e-06	0.0587248
s__Parabacteroides acidifaciens	8.63024e-06	0.090604
s__Blautia coccoides	8.62192e-06	0.0503356
s__Clostridium_Q saccharolyticum_A	8.62059e-06	0.033557
s__UMGS1498 sp900552335	8.61433e-06	0.0201342
s__Collinsella aerofaciens_K	8.60162e-06	0.395973
s__Helicobacter_B sp001854545	8.5988e-06	0.00838926
s__Collinsella sp902835305	8.59359e-06	0.310403
s__Rothia kristinae	8.57327e-06	0.110738
s__Collinsella sp900549715	8.56737e-06	0.322148
s__Collinsella sp900542235	8.56652e-06	0.322148
s__Collinsella sp900556515	8.56549e-06	0.40604
s__Collinsella sp018381235	8.551e-06	0.409396
s__Collinsella sp902363875	8.50591e-06	0.260067
s__Ligilactobacillus saerimneri	8.48295e-06	0.0151007
s__Collinsella sp900541725	8.47382e-06	0.357383
s__Collinsella sp002232035	8.47267e-06	0.256711
s__CAG-170 sp934631005	8.46363e-06	0.0486577
s__RUG410 sp934271715	8.46038e-06	0.0184564
s__Eisenbergiella tayi	8.45359e-06	0.0385906
s__CAG-269 sp001916055	8.44884e-06	0.0436242
s__Alloprevotella sp934255485	8.43651e-06	0.00167785
s__Leclercia adecarboxylata	8.42034e-06	0.0939597
s__Collinsella sp003471585	8.41896e-06	0.276846
s__Collinsella sp900548815	8.41631e-06	0.360738
s__UBA7748 sp900314535	8.38607e-06	0.0134228
s__Butyricimonas sp900184685	8.37571e-06	0.147651
s__Collinsella sp934630385	8.36978e-06	0.251678
s__Providencia alcalifaciens	8.36897e-06	0.0385906
s__Paratractidigestivibacter sp934660915	8.34977e-06	0.0721477
s__Collinsella sp900768435	8.33019e-06	0.214765
s__g__Veillonella_A__39907_2#115_bin.10.strict_clean	8.3055e-06	0.00167785
s__Dysgonomonas capnocytophagoides	8.29477e-06	0.0201342
s__Collinsella sp003438495	8.28017e-06	0.364094
s__Collinsella sp934655755	8.25761e-06	0.253356
s__Collinsella sp900549555	8.2571e-06	0.352349
s__Faecalibacterium sp934561555	8.24526e-06	0.0738255
s__Collinsella sp019419555	8.21996e-06	0.38255
s__UMGS1994 sp934130285	8.21909e-06	0.011745
s__Collinsella sp000763055	8.21611e-06	0.337248
s__CAG-269 sp934149155	8.18108e-06	0.0385906
s__Negativicoccus succinicivorans	8.17094e-06	0.114094
s__Coprococcus eutactus	8.17034e-06	0.0973154
s__Dialister sp900543455	8.14246e-06	0.0604027
s__Collinsella sp900544115	8.12716e-06	0.295302
s__Collinsella sp018373675	8.12106e-06	0.354027
s__Collinsella sp900767675	8.11895e-06	0.167785
s__Collinsella sp018382125	8.10319e-06	0.350671
s__Collinsella sp900552705	8.0814e-06	0.266779
s__Collinsella sp934630855	8.05171e-06	0.271812
s__Collinsella sp905216145	8.04932e-06	0.360738
s__Collinsella aerofaciens_AI	8.04085e-06	0.337248
s__Collinsella sp905213265	7.99875e-06	0.305369
s__Collinsella sp019414205	7.98256e-06	0.268456
s__Collinsella aerofaciens_T	7.98225e-06	0.374161
s__Collinsella sp003469205	7.97769e-06	0.293624
s__Collinsella sp019414565	7.9765e-06	0.33557
s__Collinsella sp900751665	7.97547e-06	0.322148
s__Collinsella sp900541125	7.95972e-06	0.333893
s__Clostridium tertium	7.94732e-06	0.0536913
s__RUG131 sp934162685	7.94673e-06	0.0184564
s__Collinsella sp900768795	7.9332e-06	0.145973
s__Collinsella aerofaciens_L	7.91801e-06	0.25
s__Roseburia sp934317215	7.89179e-06	0.112416
s__Collinsella sp905216175	7.86941e-06	0.389262
s__Collinsella sp003459505	7.85975e-06	0.303691
s__Collinsella sp905216075	7.85664e-06	0.365772
s__Kluyvera ascorbata_C	7.84349e-06	0.104027
s__Collinsella sp905215445	7.82088e-06	0.345638
s__Collinsella sp900544095	7.81968e-06	0.323826
s__Fusobacterium vincentii	7.80629e-06	0.151007
s__Collinsella aerofaciens_AD	7.79463e-06	0.325503
s__Collinsella aerofaciens_Z	7.78905e-06	0.246644
s__Collinsella sp900556875	7.78849e-06	0.253356
s__Pediococcus pentosaceus	7.76573e-06	0.0352349
s__Helicobacter_F sp003364115	7.7548e-06	0.00167785
s__Prevotella intermedia	7.74993e-06	0.0604027
s__Prevotella sp934254985	7.73697e-06	0.00671141
s__Collinsella sp905207425	7.72555e-06	0.395973
s__Akkermansia sp905200945	7.71536e-06	0.0637584
s__Collinsella sp900549025	7.70388e-06	0.354027
s__Bacteroides sp900555635	7.67963e-06	0.214765
s__UBA4285 sp900545225	7.63237e-06	0.105705
s__UMGS973 sp900547295	7.62358e-06	0.0302013
s__Collinsella sp900556365	7.61953e-06	0.355705
s__Collinsella sp019414515	7.61556e-06	0.401007
s__Leuconostoc lactis_A	7.60881e-06	0.184564
s__Collinsella sp900541795	7.59294e-06	0.340604
s__Collinsella sp902364645	7.58402e-06	0.233221
s__Collinsella sp900542085	7.54303e-06	0.323826
s__CAG-115 sp000432175	7.54269e-06	0.0268456
s__Collinsella sp900541665	7.53786e-06	0.300336
s__Collinsella sp019414645	7.53539e-06	0.35906
s__Collinsella sp019419585	7.53192e-06	0.325503
s__Collinsella aerofaciens_AA	7.51587e-06	0.208054
s__Collinsella sp900541885	7.5115e-06	0.345638
s__Phocaeicola faecium	7.50916e-06	0.0721477
s__Vibrio cholerae	7.4885e-06	0.0100671
s__CAG-488 sp000434055	7.47012e-06	0.0218121
s__Haemophilus influenzae_G	7.45077e-06	0.216443
s__Collinsella sp934658705	7.42469e-06	0.280201
s__Eubacterium_G sp000435815	7.42233e-06	0.0604027
s__Collinsella sp003437035	7.42188e-06	0.280201
s__Alistipes_A ihumii	7.41003e-06	0.045302
s__Aphodousia secunda_B	7.39174e-06	0.0234899
s__Collinsella aerofaciens_R	7.33281e-06	0.402685
s__CAG-877 sp000433455	7.31561e-06	0.0184564
s__Coprobacter secundus	7.30177e-06	0.0369128
s__Dysosmobacter sp019417795	7.30144e-06	0.0184564
s__Acidaminococcus timonensis	7.29513e-06	0.011745
s__Collinsella sp900543275	7.2836e-06	0.239933
s__Negativibacillus massiliensis	7.27596e-06	0.0167785
s__Alloprevotella tannerae	7.2728e-06	0.0805369
s__Collinsella sp900545445	7.26103e-06	0.288591
s__Faecousia sp900553805	7.25951e-06	0.00503356
s__Collinsella sp900544465	7.24553e-06	0.360738
s__Collinsella sp900756765	7.19754e-06	0.213087
s__CAG-390 sp900753295	7.18843e-06	0.0234899
s__HGM16780 sp900538765	7.18724e-06	0.0033557
s__Ruminococcus_F champanellensis	7.15213e-06	0.0201342
s__Collinsella sp905215065	7.14989e-06	0.300336
s__SFJ001 sp004555865	7.13544e-06	0.0402685
s__Desulfovibrio fairfieldensis	7.11836e-06	0.045302
s__Lawsonibacter sp900545895	7.11785e-06	0.0436242
s__Prevotella sp900557255	7.10833e-06	0.0503356
s__CALXXL01 sp944392655	7.08642e-06	0.011745
s__Collinsella sp900541685	7.06272e-06	0.268456
s__UBA2903 sp900768465	7.02812e-06	0.011745
s__Collinsella aerofaciens_J	7.02356e-06	0.332215
s__Collinsella sp900541235	7.01965e-06	0.293624
s__Bacteroides caecimuris	7.01626e-06	0.129195
s__Collinsella sp900542555	7.01521e-06	0.323826
s__Collinsella sp900545075	7.00173e-06	0.328859
s__Collinsella sp900764025	6.97876e-06	0.275168
s__CAG-449 sp000432895	6.96468e-06	0.0503356
s__Intestinimonas butyriciproducens	6.93837e-06	0.0755034
s__Ruminiclostridium_E sp900539195	6.92153e-06	0.0520134
s__Collinsella sp900548935	6.89935e-06	0.34396
s__Collinsella sp900556445	6.89506e-06	0.246644
s__Ventrenecus sp934085565	6.8941e-06	0.0822148
s__Collinsella aerofaciens_X	6.8937e-06	0.276846
s__Enterococcus_B durans	6.87105e-06	0.105705
s__Collinsella sp003475325	6.869e-06	0.27349
s__Collinsella sp900757465	6.82772e-06	0.286913
s__Faecalitalea cylindroides	6.77097e-06	0.0721477
s__Hallerella sp934700345	6.76893e-06	0.00167785
s__Evtepia excrementipullorum	6.75279e-06	0.057047
s__Collinsella sp900757705	6.74322e-06	0.244966
s__CAG-196 sp900549855	6.72388e-06	0.0201342
s__RUG11198 sp934149245	6.69811e-06	0.0201342
s__UBA11549 sp900550445	6.69654e-06	0.00167785
s__Collinsella sp905215815	6.69339e-06	0.27349
s__Collinsella sp900546085	6.69281e-06	0.231544
s__Faecousia sp900546415	6.68371e-06	0.0486577
s__Collinsella sp905210085	6.67514e-06	0.258389
s__CAG-170 sp934646185	6.64983e-06	0.0922819
s__Collinsella aerofaciens_N	6.64639e-06	0.182886
s__RGIG9115 sp934486495	6.59129e-06	0.0100671
s__Enterococcus_G sp913775425	6.58144e-06	0.090604
s__Collinsella sp900757595	6.57755e-06	0.271812
s__Collinsella sp900551305	6.56676e-06	0.27349
s__Collinsella sp003462685	6.55635e-06	0.209732
s__Collinsella aerofaciens_G	6.52934e-06	0.209732
s__Enterocloster asparagiformis	6.48832e-06	0.0469799
s__Collinsella sp003469185	6.47985e-06	0.285235
s__Collinsella sp900541245	6.47557e-06	0.271812
s__Eubacterium_R sp900772705	6.46649e-06	0.0872483
s__Collinsella aerofaciens_Q	6.42322e-06	0.239933
s__Collinsella sp003458415	6.41743e-06	0.246644
s__Streptococcus sobrinus	6.41444e-06	0.0587248
s__Collinsella sp018382295	6.39664e-06	0.233221
s__CAG-269 sp900553125	6.38764e-06	0.0687919
s__Collinsella sp900542965	6.38081e-06	0.278523
s__Collinsella sp023708985	6.3724e-06	0.223154
s__Collinsella aerofaciens_Y	6.36651e-06	0.303691
s__Collinsella sp018380195	6.32264e-06	0.263423
s__Collinsella aerofaciens_E	6.31765e-06	0.206376
s__Limosilactobacillus coleohominis	6.27956e-06	0.0100671
s__Collinsella sp900757495	6.27111e-06	0.199664
s__Cronobacter malonaticus	6.26682e-06	0.159396
s__Collinsella sp900549655	6.2374e-06	0.261745
s__Succinivibrio sp900555115	6.22778e-06	0.0234899
s__CAG-877 sp900768815	6.22674e-06	0.0201342
s__Faecousia sp900762935	6.21978e-06	0.0553691
s__CAG-269 sp934122085	6.20532e-06	0.045302
s__Collinsella sp900551015	6.1854e-06	0.166107
s__Faecousia sp018918045	6.17334e-06	0.057047
s__Collinsella aerofaciens_O	6.16158e-06	0.224832
s__Faecalimonas sp000209385	6.14805e-06	0.0234899
s__Collinsella sp900752275	6.12435e-06	0.302013
s__Collinsella sp900550355	6.12121e-06	0.275168
s__Lachnospira sp900551945	6.11212e-06	0.0251678
s__Dialister sp900543165	6.10801e-06	0.0436242
s__SFMI01 sp004556155	6.05197e-06	0.154362
s__Collinsella sp905215725	6.0448e-06	0.298658
s__Bacteroides bouchesdurhonensis	6.04105e-06	0.0201342
s__CAG-882 sp900545175	6.03958e-06	0.0234899
s__Collinsella sp900549455	6.01314e-06	0.224832
s__Lactobacillus sp930989465	6.0096e-06	0.0704698
s__Collinsella sp905215525	5.9854e-06	0.214765
s__Fusobacterium pseudoperiodonticum	5.96536e-06	0.365772
s__Collinsella aerofaciens	5.9424e-06	0.228188
s__CAG-492 sp000434335	5.91248e-06	0.0167785
s__Collinsella sp900545615	5.89474e-06	0.288591
s__Collinsella sp900541185	5.88387e-06	0.263423
s__Collinsella sp905215765	5.87782e-06	0.238255
s__Collinsella sp900541135	5.86431e-06	0.243289
s__CAG-475 sp900550915	5.84704e-06	0.00671141
s__Proteus cibarius	5.83108e-06	0.0419463
s__Collinsella sp900757185	5.82258e-06	0.224832
s__Onthousia sp934148995	5.81866e-06	0.0419463
s__Eubacterium_R sp000434995	5.80704e-06	0.0201342
s__Akkermansia muciniphila_A	5.80446e-06	0.0805369
s__Pseudoglutamicibacter cumminsii_A	5.79519e-06	0.0134228
s__Enterococcus_D innesii	5.79235e-06	0.186242
s__Coprococcus sp900557435	5.77924e-06	0.0302013
s__Enterobacter sp000493015	5.77555e-06	0.197987
s__CAG-605 sp934096535	5.74025e-06	0.0251678
s__Collinsella sp900551205	5.72509e-06	0.276846
s__Bifidobacterium crudilactis	5.7127e-06	0.0151007
s__CAG-269 sp905203195	5.69332e-06	0.0486577
s__Prevotella sp022775985	5.69155e-06	0.00838926
s__Collinsella sp905194675	5.67683e-06	0.228188
s__Collinsella sp900757385	5.6736e-06	0.234899
s__UMGS363 sp900550695	5.66785e-06	0.0167785
s__Stercorousia sp000437435	5.6578e-06	0.00167785
s__Onthomonas sp934597165	5.64554e-06	0.0553691
s__Sutterella parvirubra	5.64458e-06	0.0167785
s__UBA3282 sp934418125	5.59693e-06	0.0318792
s__UMGS1663 sp934133165	5.5761e-06	0.0637584
s__Collinsella sp900549215	5.54866e-06	0.255034
s__Collinsella sp003439125	5.50558e-06	0.174497
s__Anaerococcus sp900550345	5.49794e-06	0.192953
s__Merdimorpha sp003150615	5.48973e-06	0.0285235
s__Collinsella sp900550195	5.48353e-06	0.265101
s__Avilachnospira sp944377405	5.46717e-06	0.011745
s__Collinsella sp003470665	5.46424e-06	0.169463
s__VUNA01 sp016775335	5.44371e-06	0.0167785
s__Collinsella sp900553215	5.42309e-06	0.206376
s__Clostridium sp018372555	5.41629e-06	0.0738255
s__Alloprevotella sp000438115	5.4149e-06	0.00167785
s__Collinsella sp900540875	5.41088e-06	0.135906
s__Collinsella sp905215505	5.40093e-06	0.184564
s__Peptococcus niger	5.39474e-06	0.0738255
s__Collinsella sp900556675	5.37641e-06	0.243289
s__Collinsella aerofaciens_M	5.37158e-06	0.251678
s__RUG410 sp934277545	5.35717e-06	0.00838926
s__UBA1206 sp000433115	5.33744e-06	0.0218121
s__Avilachnospira sp944381485	5.31867e-06	0.00838926
s__Collinsella sp905214615	5.30024e-06	0.17953
s__Collinsella sp900549185	5.27077e-06	0.201342
s__Fusobacterium_B sp900542625	5.24373e-06	0.0033557
s__Faecalibacillus sp003480255	5.23118e-06	0.0654362
s__Limivicinus sp900547315	5.22054e-06	0.045302
s__Phascolarctobacterium sp900545535	5.17066e-06	0.00503356
s__Limisoma sp900544305	5.16368e-06	0.0385906
s__Dialister sp900759415	5.09454e-06	0.0419463
s__Collinsella sp902399975	5.08293e-06	0.139262
s__Collinsella sp019419485	5.06848e-06	0.204698
s__Collinsella sp900541475	5.06625e-06	0.260067
s__Collinsella sp900758375	4.99255e-06	0.248322
s__Ruminococcus sp934481385	4.98108e-06	0.0218121
s__UMGS1387 sp900551295	4.95356e-06	0.0268456
s__Dietzia maris	4.92814e-06	0.0872483
s__Ruminococcus sp002438605	4.92051e-06	0.00503356
s__Collinsella sp902363125	4.89912e-06	0.176174
s__Collinsella sp900546115	4.8853e-06	0.159396
s__UBA4716 sp900556575	4.85093e-06	0.0318792
s__Prevotella sp900556395	4.85082e-06	0.0302013
s__Luxibacter massiliensis	4.84516e-06	0.0268456
s__Collinsella sp900542945	4.84391e-06	0.199664
s__Collinsella sp900546455	4.82306e-06	0.187919
s__RUG472 sp900545265	4.81052e-06	0.0201342
s__UBA1829 sp900549045	4.80278e-06	0.0134228
s__Collinsella sp900542275	4.79946e-06	0.194631
s__Raoultibacter massiliensis	4.79858e-06	0.0654362
s__Odoribacter sp900541415	4.79698e-06	0.0033557
s__F23-B02 sp004553495	4.7928e-06	0.00838926
s__Metalachnospira sp902406135	4.79206e-06	0.00838926
s__Collinsella aerofaciens_V	4.77324e-06	0.16443
s__Prevotella sp900557035	4.76677e-06	0.0402685
s__Collinsella aerofaciens_W	4.75855e-06	0.191275
s__CAG-605 sp000433255	4.75837e-06	0.0251678
s__Collinsella sp900545835	4.75296e-06	0.181208
s__Collinsella sp019424965	4.74778e-06	0.191275
s__Clostridium sp018372875	4.72578e-06	0.107383
s__Cetobacterium_A sp905216205	4.70239e-06	0.0469799
s__Coprobacter sp900545915	4.69403e-06	0.0251678
s__Prevotella sp900551985	4.63047e-06	0.0402685
s__Ventrenecus sp934101275	4.62837e-06	0.0654362
s__Citrobacter_B koseri	4.62443e-06	0.124161
s__Enterobacter sp019968765	4.61715e-06	0.171141
s__Collinsella sp900541875	4.57996e-06	0.214765
s__Collinsella sp900552395	4.57669e-06	0.169463
s__Collinsella sp900540935	4.57502e-06	0.214765
s__Collinsella aerofaciens_AE	4.55505e-06	0.144295
s__Peptacetobacter hiranonis	4.54853e-06	0.182886
s__Alloprevotella sp900546605	4.52967e-06	0.00503356
s__Merdousia sp002437405	4.52962e-06	0.00838926
s__UBA10677 sp003533505	4.52942e-06	0.0151007
s__Collinsella sp900544385	4.52532e-06	0.186242
s__Collinsella sp900550825	4.52358e-06	0.177852
s__Collinsella sp902461085	4.52011e-06	0.22651
s__Leuconostoc citreum	4.51903e-06	0.0788591
s__Collinsella sp905214425	4.4989e-06	0.186242
s__Ruminococcus_C sp900545285	4.49155e-06	0.0352349
s__Sutterella merdavium	4.48105e-06	0.0302013
s__HGM11416 sp900766495	4.47794e-06	0.011745
s__Vescimonas sp934591815	4.45752e-06	0.0922819
s__Zhenhengia yiwuensis	4.4127e-06	0.0184564
s__Collinsella sp900542325	4.39829e-06	0.162752
s__Prevotella pallens	4.38546e-06	0.0671141
s__Enterobacter cloacae_N	4.35568e-06	0.171141
s__UBA737 sp900543215	4.35173e-06	0.0385906
s__Onthovivens sp900545015	4.32507e-06	0.00671141
s__Collinsella sp900541175	4.32198e-06	0.192953
s__Collinsella sp900541015	4.30272e-06	0.181208
s__CAKSFT01 sp934444735	4.28871e-06	0.0100671
s__Mediterraneibacter_A butyricigenes	4.2796e-06	0.0251678
s__Victivallis lenta	4.25286e-06	0.0302013
s__Limivicinus sp934572335	4.24779e-06	0.00671141
s__Victivallis vadensis	4.24653e-06	0.0385906
s__UBA11452 sp934661375	4.2332e-06	0.00503356
s__CAG-628 sp000438415	4.17346e-06	0.00838926
s__RUG11198 sp934131005	4.17323e-06	0.00167785
s__Collinsella sp900544865	4.17313e-06	0.191275
s__RUG11198 sp934140355	4.15209e-06	0.0285235
s__Collinsella sp900760215	4.13174e-06	0.199664
s__Lactobacillus sp910589175	4.11675e-06	0.0687919
s__Collinsella sp900764415	4.11631e-06	0.100671
s__Collinsella sp902362275	4.10644e-06	0.204698
s__Campylobacter_D jejuni_D	4.10536e-06	0.0755034
s__Blautia sp001304935	4.08305e-06	0.0620805
s__RUG806 sp900313475	4.03693e-06	0.0033557
s__CAG-245 sp900552135	4.03312e-06	0.0704698
s__Collinsella sp023656745	3.99572e-06	0.172819
s__CAG-411 sp000437275	3.99492e-06	0.0033557
s__Collinsella sp900548515	3.98382e-06	0.191275
s__Vescimonas sp934565655	3.98301e-06	0.0385906
s__CAG-353 sp945867875	3.96813e-06	0.0167785
s__Absicoccus sp000434355	3.96801e-06	0.0738255
s__Collinsella sp900552875	3.92548e-06	0.189597
s__Enterobacter chuandaensis	3.92295e-06	0.151007
s__Collinsella sp900757285	3.91946e-06	0.142617
s__Agathobacter sp934316545	3.91435e-06	0.0604027
s__Anaeroplasma sp934229785	3.9141e-06	0.00503356
s__Collinsella sp900542315	3.91408e-06	0.182886
s__Mediterraneibacter vanvlietii	3.89595e-06	0.0184564
s__Faecousia sp934630985	3.87851e-06	0.0352349
s__Limosilactobacillus timonensis	3.87715e-06	0.0520134
s__Desulfovibrio intestinigallinarum	3.87193e-06	0.00838926
s__Prevotella lascolaii	3.8716e-06	0.0352349
s__Dysosmobacter faecalis	3.86298e-06	0.0302013
s__Lawsonibacter sp900066825	3.86204e-06	0.0436242
s__Faecalibacterium sp900765705	3.85007e-06	0.0402685
s__Roseburia sp900548205	3.84968e-06	0.0721477
s__Collinsella sp900551655	3.84638e-06	0.114094
s__CAG-841 sp900544285	3.77509e-06	0.0218121
s__Collinsella sp902388345	3.7602e-06	0.13255
s__Enterobacter asburiae_C	3.73844e-06	0.114094
s__Anaerosporobacter sp019421365	3.7361e-06	0.00838926
s__Faecousia sp934667815	3.72311e-06	0.0201342
s__Collinsella sp900542155	3.71071e-06	0.115772
s__Corynebacterium amycolatum_A	3.69871e-06	0.10906
s__Faecousia sp934589705	3.68518e-06	0.0268456
s__Angelakisella sp900552845	3.64308e-06	0.0268456
s__UBA10281 sp934271735	3.63974e-06	0.0302013
s__Klebsiella grimontii	3.6276e-06	0.0855705
s__Merdousia sp900545705	3.62724e-06	0.00838926
s__Collinsella sp905208345	3.62469e-06	0.184564
s__Faecousia sp900752285	3.60873e-06	0.00167785
s__UMGS1585 sp900553205	3.60365e-06	0.011745
s__Enterococcus_C diestrammenae_A	3.58216e-06	0.0234899
s__Collinsella sp900547655	3.58201e-06	0.186242
s__UMGS1889 sp900556055	3.57708e-06	0.011745
s__Ruminococcus_C sp934463425	3.55175e-06	0.0536913
s__Alistipes sp902388705	3.54119e-06	0.033557
s__CAG-288 sp000437395	3.53455e-06	0.0218121
s__UMGS1865 sp900768535	3.51252e-06	0.0167785
s__Anaerococcus vaginalis_B	3.50008e-06	0.169463
s__Lactobacillus sp910589675	3.48378e-06	0.0436242
s__Acinetobacter bereziniae	3.48204e-06	0.0218121
s__Alloprevotella sp900752815	3.46779e-06	0.011745
s__UMGS1781 sp900553695	3.46531e-06	0.0234899
s__UBA4951 sp900540385	3.45613e-06	0.00167785
s__CAG-177 sp002451755	3.44568e-06	0.0352349
s__CAG-465 sp905204915	3.41978e-06	0.0218121
s__Coprococcus sp000154245	3.41096e-06	0.0587248
s__Desulfovibrio sp900243745	3.4079e-06	0.00671141
s__Blautia stercoravium	3.40492e-06	0.00503356
s__Baileyella intestinalis	3.39559e-06	0.0100671
s__UMGS1477 sp900761525	3.37384e-06	0.00838926
s__Collinsella sp900550185	3.3627e-06	0.139262
s__Anaerotignum sp905212195	3.34773e-06	0.0218121
s__Collinsella sp900549345	3.33459e-06	0.0922819
s__Mailhella massiliensis	3.32801e-06	0.0620805
s__Methanosphaera stadtmanae	3.28027e-06	0.00671141
s__Collinsella sp900548565	3.27254e-06	0.149329
s__Collinsella sp900550835	3.26397e-06	0.0738255
s__Fusobacterium_A ulcerans_A	3.25776e-06	0.0436242
s__Collinsella sp905197385	3.22976e-06	0.120805
s__CAG-605 sp934102255	3.20045e-06	0.0251678
s__UBA1259 sp905210545	3.19817e-06	0.00838926
s__Collinsella sp900554585	3.19361e-06	0.15604
s__CAG-533 sp900553855	3.16516e-06	0.0184564
s__Sutterella sp905206365	3.16331e-06	0.00503356
s__CAG-533 sp934098515	3.16177e-06	0.00671141
s__UMGS1477 sp900552205	3.15614e-06	0.011745
s__Corynebacterium flavescens	3.14587e-06	0.0134228
s__Limosilactobacillus intestinipullorum	3.14037e-06	0.033557
s__Sodaliphilus sp934667475	3.11988e-06	0.00167785
s__Collinsella sp022720335	3.10966e-06	0.125839
s__Collinsella sp900546775	3.07893e-06	0.0922819
s__CAG-417 sp000432835	3.05053e-06	0.0302013
s__Lacticaseibacillus pantheris	3.04814e-06	0.0033557
s__Turicimonas muris	3.0342e-06	0.0167785
s__UBA2821 sp902763335	3.02408e-06	0.00671141
s__Macrococcus_B caseolyticus	2.98821e-06	0.0302013
s__Lacrimispora sp000526575	2.97944e-06	0.033557
s__Collinsella sp900552755	2.9652e-06	0.130872
s__Collinsella sp900541675	2.96165e-06	0.174497
s__Bacteroides timonensis	2.96045e-06	0.0620805
s__UMGS1820 sp900545865	2.95715e-06	0.0553691
s__UBA7597 sp002474405	2.95e-06	0.0604027
s__Collinsella sp900541055	2.93083e-06	0.129195
s__CAG-433 sp019423565	2.91972e-06	0.0285235
s__Collinsella sp900547345	2.91153e-06	0.139262
s__Collinsella sp900548495	2.89394e-06	0.107383
s__Collinsella sp905211615	2.89353e-06	0.134228
s__UMGS1668 sp900553955	2.88762e-06	0.0033557
s__Periweissella fabalis	2.86532e-06	0.00503356
s__UMGS902 sp003343845	2.85447e-06	0.0134228
s__Proteus mirabilis_B	2.82481e-06	0.033557
s__UMGS1795 sp900555125	2.81161e-06	0.0218121
s__CAG-605 sp900545005	2.80687e-06	0.00838926
s__UBA1259 sp003523255	2.80495e-06	0.0268456
s__Collinsella aerofaciens_AB	2.77699e-06	0.0838926
s__Clostridium_J culturomicium	2.77687e-06	0.00503356
s__UBA11471 sp000434215	2.73406e-06	0.00167785
s__Bacteroides sp012113595	2.67445e-06	0.119128
s__CAG-302 sp934182615	2.64413e-06	0.0285235
s__Vescimonas sp002438575	2.63523e-06	0.0436242
s__Brachyspira pilosicoli_B	2.62688e-06	0.033557
s__CAG-115 sp934457235	2.62627e-06	0.0167785
s__Scatousia sp900321895	2.62286e-06	0.00503356
s__Collinsella sp900765115	2.62173e-06	0.104027
s__CAG-95 sp000436115	2.59797e-06	0.011745
s__UBA1740 sp900767415	2.59753e-06	0.00503356
s__Duodenibacillus sp900767875	2.55355e-06	0.00503356
s__CAG-269 sp934162615	2.55314e-06	0.0486577
s__Butyricicoccus sp900604335	2.55037e-06	0.0436242
s__Veillonella_A ratti	2.51907e-06	0.0469799
s__CACZYB01 sp016297965	2.51221e-06	0.00167785
s__Merdibacter merdigallinarum	2.51038e-06	0.00838926
s__CAG-269 sp934148985	2.49216e-06	0.0201342
s__Streptococcus sp015594605	2.47183e-06	0.0604027
s__Corynebacterium urealyticum	2.44678e-06	0.033557
s__Eubacterium_R sp934561735	2.43446e-06	0.0234899
s__Collinsella sp019419545	2.43105e-06	0.0771812
s__Lachnoclostridium phytofermentans_A	2.43065e-06	0.0033557
s__UBA10281 sp900767495	2.4016e-06	0.0469799
s__Veillonella_A sp900765165	2.40105e-06	0.00167785
s__Collinsella sp905197585	2.39282e-06	0.0922819
s__Peptacetobacter sp900539645	2.39112e-06	0.00503356
s__Saccharopolyspora rectivirgula	2.38958e-06	0.00671141
s__Paraprevotella stercorigallinarum	2.38633e-06	0.0100671
s__Fusobacterium periodonticum_B	2.36208e-06	0.0838926
s__Helicobacter_A bilis	2.35404e-06	0.0318792
s__Cryptobacteroides sp900541925	2.34942e-06	0.00167785
s__Collinsella sp905214525	2.34301e-06	0.0553691
s__Collinsella sp905216045	2.33968e-06	0.114094
s__Lactiplantibacillus pentosus	2.31214e-06	0.0201342
s__Limivicinus sp934573855	2.31017e-06	0.0134228
s__Mediterraneibacter faecavium	2.29991e-06	0.0100671
s__CAKSHC01 sp934456365	2.24435e-06	0.00671141
s__Fimicola cottocaccae	2.21668e-06	0.00671141
s__Collinsella sp905215095	2.18947e-06	0.0637584
s__Veillonella_A sp015058545	2.18062e-06	0.0587248
s__RGIG8748 sp934500705	2.15138e-06	0.00503356
s__Collinsella sp905214105	2.11207e-06	0.0553691
s__UBA6448 sp934096985	2.10377e-06	0.0151007
s__Angelakisella sp004557855	2.09416e-06	0.0234899
s__Bacteroides intestinalis_A	2.08599e-06	0.057047
s__CAKPSH01 sp934183325	2.05231e-06	0.0033557
s__Clostridium sp900759995	2.03363e-06	0.0302013
s__Streptococcus equinus_B	1.98487e-06	0.0704698
s__CAG-273 sp003534295	1.98127e-06	0.0385906
s__Collinsella sp900550205	1.96931e-06	0.0838926
s__CAG-177 sp002438685	1.95976e-06	0.0369128
s__Streptococcus troglodytae	1.94139e-06	0.0771812
s__Collinsella sp900552145	1.90097e-06	0.107383
s__CAG-269 sp934122385	1.89476e-06	0.0436242
s__Collinsella sp900762325	1.87692e-06	0.0587248
s__Collinsella sp900765185	1.87541e-06	0.0889262
s__Weizmannia ginsengihumi	1.85919e-06	0.00167785
s__CAG-269 sp945865665	1.72581e-06	0.0352349
s__Limosilactobacillus reuteri_D	1.66827e-06	0.129195
s__CAG-269 sp900553985	1.65423e-06	0.0134228
s__UBA1081 sp900543395	1.62873e-06	0.0033557
s__Fimenecus sp004556705	1.53803e-06	0.0352349
s__Prevotella sp934196725	1.50622e-06	0.0234899
s__Phascolarctobacterium sp900551745	1.47517e-06	0.033557
s__UBA2903 sp900768875	1.41666e-06	0.0134228
s__Bulleidia sp934757945	1.41348e-06	0.0385906
s__Gemmiger sp934561205	1.40873e-06	0.0318792
s__UMGS1449 sp934102055	1.40132e-06	0.0100671
s__Collinsella sp018378775	1.30361e-06	0.0503356
s__Proteus terrae	1.15982e-06	0.0184564
s__Collinsella sp900552185	1.05724e-06	0.0553691
s__Collinsella sp022713905	1.02847e-06	0.0419463
s__Collinsella sp900549355	9.86206e-07	0.033557
s__Collinsella sp022745215	9.76636e-07	0.011745
s__Eubacterium_F sp002435545	9.05727e-07	0.00838926
s__UMGS1585 sp934693215	8.74633e-07	0.00838926
s__Lawsonibacter pullicola	8.24266e-07	0.045302
s__Proteus sp011046025	7.22845e-07	0.0268456
s__Bacteroides_F sp945865495	7.18697e-07	0.011745
s__CAG-605 sp934101745	7.14238e-07	0.0268456
s__Prevotella sp900554835	6.96545e-07	0.0201342
s__Phocaeicola excrementipullorum	5.96199e-07	0.0587248
s__UMGS1338 sp934465535	4.70547e-07	0.0184564
s__CAG-724 sp003524145	4.19775e-07	0.011745
s__Prevotella sp900544495	3.98404e-07	0.00838926
s__CAG-302 sp934096105	3.66194e-07	0.0151007
s__HGM12814 sp934454005	3.41748e-07	0.0251678
s__Prevotella sp900552515	2.16096e-07	0.0100671
s__UMGS995 sp934130175	2.13806e-07	0.00671141
s__Prevotella sp022769285	2.00068e-07	0.00503356
s__Pseudoglutamicibacter cumminsii	1.50367e-07	0.0134228
s__Salmonella houtenae	1.32376e-07	0.0184564
s__Aphodousia sp900553105	1.30525e-07	0.00167785
s__Roseburia_A porci	9.79875e-08	0.0134228
s__Scatovivens sp934141445	8.45403e-08	0.0033557
s__Collinsella sp905208635	6.67608e-08	0.00503356
s__Prevotella sp900550035	4.41248e-08	0.00671141
s__UBA1436 sp934662565	7.46466e-09	0.00167785
s__RUG572 sp934643865	0	0
s__UBA7173 sp900545955	0	0
