# Supplementary material for: Ancestral trajectory of infant gut microbiome assembly in non-industrialised populations
Source: Research Square preprint supplement (doi:10.21203/rs.3.rs-6675732/v1), 2025-05-30
Supplement: Supplementary file 12 [file a96ae08ff1e7f670488b01ae.xlsx]

## Sheet: Sheet1
index_1	index_2	index_3	Africa	Asia	Kenya	Uganda	Malawi	Burkina Faso	Pakistan	Bangladesh	Migori	Mbagathi	Kilifi	Kampala	Blantyre	Banfora	Karachi	Dhaka	Matlab
Age (months)	Age (months)	Age (months)	13.2 (7.29, 19)	12.7 (6.64, 18.8)	13.6 (7.92, 19.3)	11.2 (5.51, 16.9)	15.7 (10, 21.5)	12.6 (6.22, 19.1)	12.9 (6.76, 19)	12.3 (6.4, 18.3)	9.98 (4.29, 15.7)	14.3 (8.76, 19.9)	14.2 (8.79, 19.5)	11.2 (5.51, 16.9)	15.7 (10, 21.5)	12.6 (6.22, 19.1)	12.9 (6.76, 19)	12.1 (5.55, 18.7)	12.5 (7.34, 17.8)
Blood cell tests	Basophils ($10^3$ cells/µL)	Basophils ($10^3$ cells/µL)	0.123 (0.00672, 0.239)	0.0366 (-0.111, 0.184)	0.104 (-0.0091, 0.218)	0.193 (0.0838, 0.302)	0.156 (0.0783, 0.233)	0.0263 (0.0121, 0.0406)	0.0331 (-0.146, 0.212)	0.0437 (0.0225, 0.065)	0 (0, 0)	0.0762 (0.0186, 0.134)	0.127 (-0.00877, 0.263)	0.193 (0.0838, 0.302)	0.156 (0.0783, 0.233)	0.0263 (0.0121, 0.0406)	0.0331 (-0.146, 0.212)	0.042 (0.0231, 0.0609)	0.0455 (0.0222, 0.0688)
	EDTA	Acceptable	386 (95.3%)	179 (93.7%)	248 (97.3%)	88 (97.8%)	20 (66.7%)	30 (100%)	120 (91.6%)	59 (98.3%)	37 (100%)	87 (92.6%)	124 (100%)	88 (97.8%)	20 (66.7%)	30 (100%)	120 (91.6%)	30 (100%)	29 (96.7%)
		Clotted	1 (0.247%)	0 (0%)	0 (0%)	1 (1.11%)	0 (0%)	0 (0%)	0 (0%)	0 (0%)	0 (0%)	0 (0%)	0 (0%)	1 (1.11%)	0 (0%)	0 (0%)	0 (0%)	0 (0%)	0 (0%)
		Missing	2 (0.494%)	7 (3.66%)	2 (0.784%)	0 (0%)	0 (0%)	0 (0%)	7 (5.34%)	0 (0%)	0 (0%)	2 (2.13%)	0 (0%)	0 (0%)	0 (0%)	0 (0%)	7 (5.34%)	0 (0%)	0 (0%)
		Status not indicated	16 (3.95%)	2 (1.05%)	5 (1.96%)	1 (1.11%)	10 (33.3%)	0 (0%)	2 (1.53%)	0 (0%)	0 (0%)	5 (5.32%)	0 (0%)	1 (1.11%)	10 (33.3%)	0 (0%)	2 (1.53%)	0 (0%)	0 (0%)
		Unknown	0 (0%)	3 (1.57%)	0 (0%)	0 (0%)	0 (0%)	0 (0%)	2 (1.53%)	1 (1.67%)	0 (0%)	0 (0%)	0 (0%)	0 (0%)	0 (0%)	0 (0%)	2 (1.53%)	0 (0%)	1 (3.33%)
	Haemoglobin (g/dL)	Haemoglobin (g/dL)	10.4 (9.09, 11.6)	9.94 (8.58, 11.3)	10.3 (9.05, 11.5)	10.6 (9.24, 11.9)	11.3 (10.2, 12.4)	9.79 (8.65, 10.9)	9.98 (8.58, 11.4)	9.85 (8.58, 11.1)	10.6 (9.58, 11.7)	11 (10, 12)	9.72 (8.53, 10.9)	10.6 (9.24, 11.9)	11.3 (10.2, 12.4)	9.79 (8.65, 10.9)	9.98 (8.58, 11.4)	9.69 (8.29, 11.1)	10 (8.91, 11.1)
	Lymphocytes ($10^3$ cells/µL)	Lymphocytes ($10^3$ cells/µL)	7.05 (4.12, 9.98)	8 (4.8, 11.2)	6.87 (3.89, 9.86)	7.11 (4.42, 9.79)	7.71 (4.64, 10.8)	7.87 (4.96, 10.8)	8.31 (4.98, 11.6)	7.38 (4.56, 10.2)	6.33 (3.94, 8.72)	6.49 (3.79, 9.18)	7.31 (4.06, 10.6)	7.11 (4.42, 9.79)	7.71 (4.64, 10.8)	7.87 (4.96, 10.8)	8.31 (4.98, 11.6)	7.48 (5.04, 9.92)	7.27 (4.12, 10.4)
	Monocytes ($10^3$ cells/µL)	Monocytes ($10^3$ cells/µL)	0.935 (0.257, 1.61)	1.14 (-0.243, 2.53)	1.08 (0.294, 1.87)	0.622 (0.333, 0.911)	0.743 (0.346, 1.14)	0.927 (0.545, 1.31)	1.38 (-0.247, 3.01)	0.658 (0.38, 0.935)	0 (0, 0)	0.973 (0.0382, 1.91)	1.19 (0.556, 1.83)	0.622 (0.333, 0.911)	0.743 (0.346, 1.14)	0.927 (0.545, 1.31)	1.38 (-0.247, 3.01)	0.595 (0.327, 0.863)	0.722 (0.451, 0.994)
	Neutrophils ($10^3$ cells/µL)	Neutrophils ($10^3$ cells/µL)	2.93 (1.19, 4.67)	4.45 (1.71, 7.19)	3.04 (1.14, 4.94)	2.77 (1.35, 4.19)	2.9 (1.55, 4.26)	2.64 (1.11, 4.17)	4.45 (1.33, 7.58)	4.44 (2.77, 6.12)	0 (0, 0)	3.03 (1.2, 4.86)	3.14 (1.25, 5.04)	2.77 (1.35, 4.19)	2.9 (1.55, 4.26)	2.64 (1.11, 4.17)	4.45 (1.33, 7.58)	3.96 (2.53, 5.39)	4.94 (3.17, 6.7)
	Osinophils ($10^3$ cells/µL)	Osinophils ($10^3$ cells/µL)	0.352 (-0.129, 0.833)	0.712 (-0.0656, 1.49)	0.382 (-0.176, 0.94)	0.315 (-0.0262, 0.657)	0.262 (-0.0244, 0.548)	0.302 (0.029, 0.576)	0.57 (-0.132, 1.27)	1 (0.161, 1.84)	0 (0, 0)	0.403 (-0.339, 1.15)	0.379 (-0.00614, 0.764)	0.315 (-0.0262, 0.657)	0.262 (-0.0244, 0.548)	0.302 (0.029, 0.576)	0.57 (-0.132, 1.27)	0.849 (0.0939, 1.6)	1.16 (0.265, 2.05)
	Platelets ($10^3$ cells/µL)	Platelets ($10^3$ cells/µL)	461 (302, 620)	466 (295, 638)	463 (306, 620)	486 (330, 642)	408 (291, 524)	406 (218, 595)	483 (305, 661)	432 (281, 583)	408 (286, 531)	481 (320, 642)	466 (307, 626)	486 (330, 642)	408 (291, 524)	406 (218, 595)	483 (305, 661)	434 (286, 583)	430 (276, 583)
	Red blood cells ($10^6$ cells/µL)	Red blood cells ($10^6$ cells/µL)	4.77 (4.19, 5.34)	4.67 (4.06, 5.27)	4.79 (4.23, 5.34)	4.68 (4.13, 5.23)	4.97 (4.46, 5.48)	4.69 (3.9, 5.47)	4.69 (4.04, 5.34)	4.62 (4.1, 5.14)	4.4 (3.8, 5)	4.97 (4.49, 5.46)	4.77 (4.25, 5.3)	4.68 (4.13, 5.23)	4.97 (4.46, 5.48)	4.69 (3.9, 5.47)	4.69 (4.04, 5.34)	4.53 (4.05, 5.01)	4.71 (4.18, 5.25)
	White blood cells ($10^3$ cells/µL)	White blood cells ($10^3$ cells/µL)	11.3 (7.2, 15.4)	14.2 (9.35, 19)	11.3 (7.03, 15.6)	11 (7.41, 14.6)	11.8 (7.73, 15.8)	11.8 (7.88, 15.6)	14.5 (9.36, 19.6)	13.5 (9.47, 17.6)	9.95 (6.93, 13)	10.8 (6.63, 15)	12.1 (7.56, 16.7)	11 (7.41, 14.6)	11.8 (7.73, 15.8)	11.8 (7.88, 15.6)	14.5 (9.36, 19.6)	12.9 (9.2, 16.7)	14.1 (9.87, 18.4)
Blood tests	ALT (µg/L)	ALT (µg/L)	18.7 (6.06, 31.3)	23.8 (2.04, 45.5)	19.8 (5.64, 33.9)	17.4 (6.33, 28.5)	17.2 (9.67, 24.8)	17.1 (7.04, 27.2)	24.2 (1.48, 47)	19.9 (10.8, 28.9)	17 (8.56, 25.4)	14.9 (6.77, 23.1)	23.8 (6.62, 41)	17.4 (6.33, 28.5)	17.2 (9.67, 24.8)	17.1 (7.04, 27.2)	24.2 (1.48, 47)	16 (12.2, 19.8)	21.6 (11.5, 31.8)
	Albumin (g/L)	Albumin (g/L)	42.4 (37.1, 47.8)	43.4 (40.6, 46.2)	41.3 (37, 45.6)	43.8 (40.3, 47.2)	46.1 (34.9, 57.4)	42 (37.4, 46.6)	43.6 (40.9, 46.4)	41.3 (39.3, 43.2)	41.6 (38.1, 45.1)	43.1 (39.9, 46.4)	39.9 (35.3, 44.6)	43.8 (40.3, 47.2)	46.1 (34.9, 57.4)	42 (37.4, 46.6)	43.6 (40.9, 46.4)	40.6 (38.7, 42.5)	41.6 (39.6, 43.5)
	Alkaline Phosphate (µg/L)	Alkaline Phosphate (µg/L)	307 (189, 426)	250 (150, 351)	305 (198, 411)	327 (184, 470)	268 (187, 349)	291 (171, 411)	251 (149, 354)	243 (157, 329)	317 (224, 411)	309 (174, 443)	298 (210, 386)	327 (184, 470)	268 (187, 349)	291 (171, 411)	251 (149, 354)	227 (140, 314)	250 (165, 335)
	Bilirubin (µmol/L)	Bilirubin (µmol/L)	4.76 (-1.45, 11)	4.35 (-1.69, 10.4)	4.87 (0.854, 8.89)	4.68 (-4.86, 14.2)	2.07 (0.647, 3.49)	6.15 (-0.112, 12.4)	4.37 (-2.01, 10.8)	4.11 (2.78, 5.44)	3.29 (2.48, 4.1)	4 (2.35, 5.65)	6.02 (0.731, 11.3)	4.68 (-4.86, 14.2)	2.07 (0.647, 3.49)	6.15 (-0.112, 12.4)	4.37 (-2.01, 10.8)	4.55 (3.42, 5.67)	3.91 (2.55, 5.28)
	Calcium (mmol/L)	Calcium (mmol/L)	2.41 (2.12, 2.7)	3.39 (3.03, 3.75)	2.36 (2.21, 2.52)	2.51 (2.36, 2.65)	2.59 (1.84, 3.33)	2.26 (1.95, 2.56)	3.5 (3.34, 3.67)	2.48 (2.36, 2.61)	2.41 (2.28, 2.54)	2.36 (2.22, 2.5)	2.34 (2.17, 2.52)	2.51 (2.36, 2.65)	2.59 (1.84, 3.33)	2.26 (1.95, 2.56)	3.5 (3.34, 3.67)	2.46 (2.37, 2.55)	2.49 (2.36, 2.63)
	Creatinine (mmol/L)	Creatinine (mmol/L)	24.2 (11.2, 37.2)	21.2 (14.8, 27.6)	30.6 (18.6, 42.5)	19.1 (14.7, 23.6)	6.69 (-4.09, 17.5)	14.1 (3.54, 24.7)	21.5 (14.8, 28.1)	19.3 (15.9, 22.6)	19.8 (15.1, 24.5)	20.9 (16.8, 24.9)	40.8 (32.9, 48.7)	19.1 (14.7, 23.6)	6.69 (-4.09, 17.5)	14.1 (3.54, 24.7)	21.5 (14.8, 28.1)	20.8 (16.5, 25.1)	18.6 (16, 21.1)
	Magnesium (mmol/L)	Magnesium (mmol/L)	0.924 (0.802, 1.05)	0.905 (0.82, 0.99)	0.921 (0.814, 1.03)	0.954 (0.877, 1.03)	0.927 (0.75, 1.1)	0.835 (0.621, 1.05)	0.906 (0.818, 0.995)	0.894 (0.843, 0.946)	0.933 (0.865, 1)	0.929 (0.851, 1.01)	0.912 (0.78, 1.04)	0.954 (0.877, 1.03)	0.927 (0.75, 1.1)	0.835 (0.621, 1.05)	0.906 (0.818, 0.995)	0.88 (0.835, 0.925)	0.901 (0.848, 0.954)
	Phosphate (mmol/L)	Phosphate (mmol/L)	1.82 (1.47, 2.17)	2.39 (-4.81, 9.6)	1.78 (1.48, 2.08)	1.92 (1.65, 2.19)	2.13 (1.14, 3.12)	1.72 (1.37, 2.07)	2.49 (-5.15, 10.1)	1.64 (1.42, 1.86)	1.91 (1.64, 2.18)	1.86 (1.62, 2.1)	1.67 (1.37, 1.98)	1.92 (1.65, 2.19)	2.13 (1.14, 3.12)	1.72 (1.37, 2.07)	2.49 (-5.15, 10.1)	1.54 (1.3, 1.77)	1.69 (1.5, 1.88)
	Potassium (mmol/L)	Potassium (mmol/L)	4.59 (3.34, 5.84)	4.76 (4.13, 5.38)	4.33 (3.8, 4.86)	4.8 (4.17, 5.44)	5.67 (2.02, 9.32)	4.57 (3.82, 5.31)	4.82 (4.2, 5.43)	4.24 (3.76, 4.73)	4.65 (4.14, 5.16)	4.47 (4.12, 4.83)	4.12 (3.58, 4.66)	4.8 (4.17, 5.44)	5.67 (2.02, 9.32)	4.57 (3.82, 5.31)	4.82 (4.2, 5.43)	4.12 (3.73, 4.51)	4.3 (3.79, 4.81)
	Serum	Acceptable	316 (78%)	145 (75.9%)	177 (69.4%)	89 (98.9%)	28 (93.3%)	22 (73.3%)	129 (98.5%)	16 (26.7%)	33 (89.2%)	56 (59.6%)	88 (71%)	89 (98.9%)	28 (93.3%)	22 (73.3%)	129 (98.5%)	5 (16.7%)	11 (36.7%)
		Haemolysed	4 (0.988%)	0 (0%)	1 (0.392%)	0 (0%)	0 (0%)	3 (10%)	0 (0%)	0 (0%)	0 (0%)	1 (1.06%)	0 (0%)	0 (0%)	0 (0%)	3 (10%)	0 (0%)	0 (0%)	0 (0%)
		Insufficient	12 (2.96%)	0 (0%)	8 (3.14%)	0 (0%)	0 (0%)	4 (13.3%)	0 (0%)	0 (0%)	1 (2.7%)	4 (4.26%)	3 (2.42%)	0 (0%)	0 (0%)	4 (13.3%)	0 (0%)	0 (0%)	0 (0%)
		Missing	22 (5.43%)	1 (0.524%)	22 (8.63%)	0 (0%)	0 (0%)	0 (0%)	0 (0%)	1 (1.67%)	1 (2.7%)	20 (21.3%)	1 (0.806%)	0 (0%)	0 (0%)	0 (0%)	0 (0%)	0 (0%)	1 (3.33%)
		Status not indicated	51 (12.6%)	45 (23.6%)	47 (18.4%)	1 (1.11%)	2 (6.67%)	1 (3.33%)	2 (1.53%)	43 (71.7%)	2 (5.41%)	13 (13.8%)	32 (25.8%)	1 (1.11%)	2 (6.67%)	1 (3.33%)	2 (1.53%)	25 (83.3%)	18 (60%)
	Sodium (mmol/L)	Sodium (mmol/L)	138 (131, 145)	139 (136, 142)	136 (133, 140)	136 (131, 141)	147 (132, 161)	143 (133, 154)	139 (137, 142)	135 (132, 138)	136 (134, 138)	138 (134, 142)	135 (133, 138)	136 (131, 141)	147 (132, 161)	143 (133, 154)	139 (137, 142)	134 (132, 136)	136 (133, 139)
	Urea (mmol/L)	Urea (mmol/L)	2.1 (0.518, 3.68)	3.39 (1.19, 5.59)	1.8 (0.872, 2.72)	1.82 (0.878, 2.77)	5.38 (2.53, 8.22)	1.55 (0.996, 2.1)	3.54 (1.27, 5.82)	2.16 (1.53, 2.79)	1.46 (0.585, 2.33)	1.8 (0.85, 2.74)	1.92 (1.02, 2.82)	1.82 (0.878, 2.77)	5.38 (2.53, 8.22)	1.55 (0.996, 2.1)	3.54 (1.27, 5.82)	2.29 (1.94, 2.63)	2.1 (1.38, 2.82)
Caesarean section	Caesarean section	Caesarean section	No: 506 (92.1%), Yes: 90 (7.9%)	No: 506 (69.6%), Yes: 90 (30.4%)	No: 506 (92.2%), Yes: 90 (7.84%)	No: 506 (91.1%), Yes: 90 (8.89%)	No: 506 (90%), Yes: 90 (10%)	No: 506 (96.7%), Yes: 90 (3.33%)	No: 506 (76.3%), Yes: 90 (23.7%)	No: 506 (55%), Yes: 90 (45%)	No: 506 (86.5%), Yes: 90 (13.5%)	No: 506 (92.6%), Yes: 90 (7.45%)	No: 506 (93.5%), Yes: 90 (6.45%)	No: 506 (91.1%), Yes: 90 (8.89%)	No: 506 (90%), Yes: 90 (10%)	No: 506 (96.7%), Yes: 90 (3.33%)	No: 506 (76.3%), Yes: 90 (23.7%)	No: 506 (50%), Yes: 90 (50%)	No: 506 (60%), Yes: 90 (40%)
Diet	First 3 days after birth	Animal milk	3 (0.741%)	2 (1.05%)	1 (0.392%)	2 (2.22%)	0 (0%)	0 (0%)	1 (0.763%)	1 (1.67%)	0 (0%)	0 (0%)	1 (0.806%)	2 (2.22%)	0 (0%)	0 (0%)	1 (0.763%)	1 (3.33%)	0 (0%)
		Formula / powder milk	5 (1.23%)	10 (5.24%)	2 (0.784%)	3 (3.33%)	0 (0%)	0 (0%)	1 (0.763%)	9 (15%)	0 (0%)	1 (1.06%)	1 (0.806%)	3 (3.33%)	0 (0%)	0 (0%)	1 (0.763%)	6 (20%)	3 (10%)
		Gutthi / gripe water	0 (0%)	7 (3.66%)	0 (0%)	0 (0%)	0 (0%)	0 (0%)	7 (5.34%)	0 (0%)	0 (0%)	0 (0%)	0 (0%)	0 (0%)	0 (0%)	0 (0%)	7 (5.34%)	0 (0%)	0 (0%)
		Porridge / pulp	3 (0.741%)	0 (0%)	3 (1.18%)	0 (0%)	0 (0%)	0 (0%)	0 (0%)	0 (0%)	0 (0%)	1 (1.06%)	2 (1.61%)	0 (0%)	0 (0%)	0 (0%)	0 (0%)	0 (0%)	0 (0%)
		Pure honey	0 (0%)	62 (32.5%)	0 (0%)	0 (0%)	0 (0%)	0 (0%)	54 (41.2%)	8 (13.3%)	0 (0%)	0 (0%)	0 (0%)	0 (0%)	0 (0%)	0 (0%)	54 (41.2%)	6 (20%)	2 (6.67%)
		Sugar water	15 (3.7%)	11 (5.76%)	4 (1.57%)	11 (12.2%)	0 (0%)	0 (0%)	2 (1.53%)	9 (15%)	0 (0%)	1 (1.06%)	3 (2.42%)	11 (12.2%)	0 (0%)	0 (0%)	2 (1.53%)	8 (26.7%)	1 (3.33%)
		Tea	3 (0.741%)	18 (9.42%)	1 (0.392%)	2 (2.22%)	0 (0%)	0 (0%)	18 (13.7%)	0 (0%)	0 (0%)	1 (1.06%)	0 (0%)	2 (2.22%)	0 (0%)	0 (0%)	18 (13.7%)	0 (0%)	0 (0%)
	Typical food	Breast feeding	No: 139 (23.5%), Yes: 457 (76.5%)	No: 139 (23%), Yes: 457 (77%)	No: 139 (20%), Yes: 457 (80%)	No: 139 (33.3%), Yes: 457 (66.7%)	No: 139 (33.3%), Yes: 457 (66.7%)	No: 139 (13.3%), Yes: 457 (86.7%)	No: 139 (30.5%), Yes: 457 (69.5%)	No: 139 (6.67%), Yes: 457 (93.3%)	No: 139 (16.2%), Yes: 457 (83.8%)	No: 139 (17%), Yes: 457 (83%)	No: 139 (23.4%), Yes: 457 (76.6%)	No: 139 (33.3%), Yes: 457 (66.7%)	No: 139 (33.3%), Yes: 457 (66.7%)	No: 139 (13.3%), Yes: 457 (86.7%)	No: 139 (30.5%), Yes: 457 (69.5%)	No: 139 (6.67%), Yes: 457 (93.3%)	No: 139 (6.67%), Yes: 457 (93.3%)
		Eggs	118 (29.1%)	90 (47.1%)	85 (33.3%)	23 (25.6%)	7 (23.3%)	3 (10%)	58 (44.3%)	32 (53.3%)	16 (43.2%)	59 (62.8%)	10 (8.06%)	23 (25.6%)	7 (23.3%)	3 (10%)	58 (44.3%)	8 (26.7%)	24 (80%)
		Fats / oils	167 (41.2%)	78 (40.8%)	120 (47.1%)	18 (20%)	15 (50%)	14 (46.7%)	44 (33.6%)	34 (56.7%)	12 (32.4%)	81 (86.2%)	27 (21.8%)	18 (20%)	15 (50%)	14 (46.7%)	44 (33.6%)	11 (36.7%)	23 (76.7%)
		Fish / sea foods	163 (40.2%)	58 (30.4%)	101 (39.6%)	43 (47.8%)	7 (23.3%)	12 (40%)	28 (21.4%)	30 (50%)	17 (45.9%)	65 (69.1%)	19 (15.3%)	43 (47.8%)	7 (23.3%)	12 (40%)	28 (21.4%)	5 (16.7%)	25 (83.3%)
		Fruits	201 (49.6%)	97 (50.8%)	165 (64.7%)	25 (27.8%)	7 (23.3%)	4 (13.3%)	66 (50.4%)	31 (51.7%)	21 (56.8%)	83 (88.3%)	61 (49.2%)	25 (27.8%)	7 (23.3%)	4 (13.3%)	66 (50.4%)	7 (23.3%)	24 (80%)
		Meats / poultry	120 (29.6%)	51 (26.7%)	77 (30.2%)	32 (35.6%)	3 (10%)	8 (26.7%)	27 (20.6%)	24 (40%)	12 (32.4%)	55 (58.5%)	10 (8.06%)	32 (35.6%)	3 (10%)	8 (26.7%)	27 (20.6%)	3 (10%)	21 (70%)
		Milk / milk products	212 (52.3%)	126 (66%)	154 (60.4%)	51 (56.7%)	3 (10%)	4 (13.3%)	92 (70.2%)	34 (56.7%)	28 (75.7%)	81 (86.2%)	45 (36.3%)	51 (56.7%)	3 (10%)	4 (13.3%)	92 (70.2%)	16 (53.3%)	18 (60%)
		Miscellaneous	13 (3.21%)	79 (41.4%)	13 (5.1%)	0 (0%)	0 (0%)	0 (0%)	49 (37.4%)	30 (50%)	4 (10.8%)	9 (9.57%)	0 (0%)	0 (0%)	0 (0%)	0 (0%)	49 (37.4%)	8 (26.7%)	22 (73.3%)
		Pulses / legumes / nuts / seeds	194 (47.9%)	78 (40.8%)	121 (47.5%)	57 (63.3%)	14 (46.7%)	2 (6.67%)	43 (32.8%)	35 (58.3%)	18 (48.6%)	80 (85.1%)	23 (18.5%)	57 (63.3%)	14 (46.7%)	2 (6.67%)	43 (32.8%)	13 (43.3%)	22 (73.3%)
		Roots / tubers	164 (40.5%)	78 (40.8%)	113 (44.3%)	50 (55.6%)	1 (3.33%)	0 (0%)	39 (29.8%)	39 (65%)	19 (51.4%)	82 (87.2%)	12 (9.68%)	50 (55.6%)	1 (3.33%)	0 (0%)	39 (29.8%)	13 (43.3%)	26 (86.7%)
		Sugars / honey / juices	199 (49.1%)	102 (53.4%)	131 (51.4%)	33 (36.7%)	20 (66.7%)	15 (50%)	63 (48.1%)	39 (65%)	18 (48.6%)	79 (84%)	34 (27.4%)	33 (36.7%)	20 (66.7%)	15 (50%)	63 (48.1%)	16 (53.3%)	23 (76.7%)
		Vegetables	207 (51.1%)	93 (48.7%)	173 (67.8%)	18 (20%)	15 (50%)	1 (3.33%)	59 (45%)	34 (56.7%)	17 (45.9%)	78 (83%)	78 (62.9%)	18 (20%)	15 (50%)	1 (3.33%)	59 (45%)	9 (30%)	25 (83.3%)
HIV	HIV infected	HIV infected	0 (0%)	0 (0%)	0 (0%)	0 (0%)	0 (0%)	0 (0%)	0 (0%)	0 (0%)	0 (0%)	0 (0%)	0 (0%)	0 (0%)	0 (0%)	0 (0%)	0 (0%)	0 (0%)	0 (0%)
	HIV status	No, exposed but untested	23 (5.68%)	0 (0%)	13 (5.1%)	9 (10%)	1 (3.33%)	0 (0%)	0 (0%)	0 (0%)	7 (18.9%)	4 (4.26%)	2 (1.61%)	9 (10%)	1 (3.33%)	0 (0%)	0 (0%)	0 (0%)	0 (0%)
		No, no known exposure, not tested	364 (89.9%)	191 (100%)	231 (90.6%)	78 (86.7%)	25 (83.3%)	30 (100%)	131 (100%)	60 (100%)	28 (75.7%)	87 (92.6%)	116 (93.5%)	78 (86.7%)	25 (83.3%)	30 (100%)	131 (100%)	30 (100%)	30 (100%)
		Unknown	4 (0.988%)	0 (0%)	4 (1.57%)	0 (0%)	0 (0%)	0 (0%)	0 (0%)	0 (0%)	0 (0%)	1 (1.06%)	3 (2.42%)	0 (0%)	0 (0%)	0 (0%)	0 (0%)	0 (0%)	0 (0%)
		Yes, Ab +ve, unknown PCR status	2 (0.494%)	0 (0%)	1 (0.392%)	1 (1.11%)	0 (0%)	0 (0%)	0 (0%)	0 (0%)	0 (0%)	1 (1.06%)	0 (0%)	1 (1.11%)	0 (0%)	0 (0%)	0 (0%)	0 (0%)	0 (0%)
		Yes, exposed and PCR +ve	12 (2.96%)	0 (0%)	6 (2.35%)	2 (2.22%)	4 (13.3%)	0 (0%)	0 (0%)	0 (0%)	2 (5.41%)	1 (1.06%)	3 (2.42%)	2 (2.22%)	4 (13.3%)	0 (0%)	0 (0%)	0 (0%)	0 (0%)
Malnutrition	Middle-upper arm circumference (cm)	Middle-upper arm circumference (cm)	14 (12.8, 15.1)	13.2 (12.1, 14.4)	14 (12.8, 15.2)	13.7 (12.6, 14.7)	14.7 (13.7, 15.8)	13.6 (12.5, 14.7)	13.2 (12, 14.4)	13.4 (12.3, 14.5)	13.9 (12.7, 15.1)	14.4 (13.1, 15.6)	13.7 (12.7, 14.8)	13.7 (12.6, 14.7)	14.7 (13.7, 15.8)	13.6 (12.5, 14.7)	13.2 (12, 14.4)	13.5 (12.5, 14.4)	13.3 (12.2, 14.5)
	Weight-for-height Z-score	Weight-for-height Z-score	-0.13 (-1.34, 1.08)	-0.834 (-2.04, 0.372)	-0.224 (-1.47, 1.02)	0.075 (-1.06, 1.21)	0.215 (-0.91, 1.34)	-0.287 (-1.3, 0.726)	-0.896 (-2.15, 0.353)	-0.699 (-1.8, 0.397)	0.431 (-1.2, 2.06)	0.183 (-0.873, 1.24)	-0.728 (-1.75, 0.295)	0.075 (-1.06, 1.21)	0.215 (-0.91, 1.34)	-0.287 (-1.3, 0.726)	-0.896 (-2.15, 0.353)	-0.625 (-1.8, 0.554)	-0.773 (-1.77, 0.228)
Previous treatment	Medication in last 7 days	Antibiotic	60 (14.8%)	28 (14.7%)	44 (17.3%)	12 (13.3%)	4 (13.3%)	0 (0%)	18 (13.7%)	10 (16.7%)	6 (16.2%)	28 (29.8%)	10 (8.06%)	12 (13.3%)	4 (13.3%)	0 (0%)	18 (13.7%)	5 (16.7%)	5 (16.7%)
		Antimalarial	12 (2.96%)	1 (0.524%)	5 (1.96%)	6 (6.67%)	1 (3.33%)	0 (0%)	1 (0.763%)	0 (0%)	1 (2.7%)	1 (1.06%)	3 (2.42%)	6 (6.67%)	1 (3.33%)	0 (0%)	1 (0.763%)	0 (0%)	0 (0%)
		De-worming	3 (0.741%)	0 (0%)	1 (0.392%)	2 (2.22%)	0 (0%)	0 (0%)	0 (0%)	0 (0%)	0 (0%)	1 (1.06%)	0 (0%)	2 (2.22%)	0 (0%)	0 (0%)	0 (0%)	0 (0%)	0 (0%)
		None	257 (63.5%)	111 (58.1%)	161 (63.1%)	46 (51.1%)	23 (76.7%)	27 (90%)	80 (61.1%)	31 (51.7%)	27 (73%)	44 (46.8%)	90 (72.6%)	46 (51.1%)	23 (76.7%)	27 (90%)	80 (61.1%)	13 (43.3%)	18 (60%)
		Other	50 (12.3%)	31 (16.2%)	36 (14.1%)	9 (10%)	3 (10%)	2 (6.67%)	18 (13.7%)	13 (21.7%)	0 (0%)	21 (22.3%)	15 (12.1%)	9 (10%)	3 (10%)	2 (6.67%)	18 (13.7%)	5 (16.7%)	8 (26.7%)
		Tranditional	6 (1.48%)	0 (0%)	2 (0.784%)	4 (4.44%)	0 (0%)	0 (0%)	0 (0%)	0 (0%)	1 (2.7%)	1 (1.06%)	0 (0%)	4 (4.44%)	0 (0%)	0 (0%)	0 (0%)	0 (0%)	0 (0%)
		Vitamin	4 (0.988%)	6 (3.14%)	2 (0.784%)	2 (2.22%)	0 (0%)	0 (0%)	1 (0.763%)	5 (8.33%)	0 (0%)	0 (0%)	2 (1.61%)	2 (2.22%)	0 (0%)	0 (0%)	1 (0.763%)	4 (13.3%)	1 (3.33%)
		Yes (unknown)	25 (6.17%)	22 (11.5%)	10 (3.92%)	15 (16.7%)	0 (0%)	0 (0%)	17 (13%)	5 (8.33%)	1 (2.7%)	3 (3.19%)	6 (4.84%)	15 (16.7%)	0 (0%)	0 (0%)	17 (13%)	5 (16.7%)	0 (0%)
	Previous admission to hospital	1 week - 1 month ago	6 (1.48%)	10 (5.24%)	2 (0.784%)	3 (3.33%)	1 (3.33%)	0 (0%)	9 (6.87%)	1 (1.67%)	1 (2.7%)	0 (0%)	1 (0.806%)	3 (3.33%)	1 (3.33%)	0 (0%)	9 (6.87%)	1 (3.33%)	0 (0%)
		<1 week ago	0 (0%)	2 (1.05%)	0 (0%)	0 (0%)	0 (0%)	0 (0%)	0 (0%)	2 (3.33%)	0 (0%)	0 (0%)	0 (0%)	0 (0%)	0 (0%)	0 (0%)	0 (0%)	0 (0%)	2 (6.67%)
		>1 month ago	21 (5.19%)	7 (3.66%)	15 (5.88%)	2 (2.22%)	2 (6.67%)	2 (6.67%)	2 (1.53%)	5 (8.33%)	0 (0%)	7 (7.45%)	8 (6.45%)	2 (2.22%)	2 (6.67%)	2 (6.67%)	2 (1.53%)	4 (13.3%)	1 (3.33%)
		No	378 (93.3%)	172 (90.1%)	238 (93.3%)	85 (94.4%)	27 (90%)	28 (93.3%)	120 (91.6%)	52 (86.7%)	36 (97.3%)	87 (92.6%)	115 (92.7%)	85 (94.4%)	27 (90%)	28 (93.3%)	120 (91.6%)	25 (83.3%)	27 (90%)
Season	Day-of-year for sample collection	Day-of-year for sample collection	0.497 (0.242, 0.751)	0.451 (0.156, 0.746)	0.477 (0.23, 0.724)	0.567 (0.319, 0.816)	0.346 (0.152, 0.54)	0.598 (0.316, 0.88)	0.423 (0.124, 0.722)	0.513 (0.236, 0.79)	0.518 (0.343, 0.694)	0.446 (0.18, 0.712)	0.488 (0.241, 0.736)	0.567 (0.319, 0.816)	0.346 (0.152, 0.54)	0.598 (0.316, 0.88)	0.423 (0.124, 0.722)	0.552 (0.29, 0.814)	0.474 (0.188, 0.76)
Sex	Sex	Sex	Male: 315 (51.9%), Female: 281 (48.1%)	Male: 315 (55%), Female: 281 (45%)	Male: 315 (56.5%), Female: 281 (43.5%)	Male: 315 (45.6%), Female: 281 (54.4%)	Male: 315 (43.3%), Female: 281 (56.7%)	Male: 315 (40%), Female: 281 (60%)	Male: 315 (55.7%), Female: 281 (44.3%)	Male: 315 (53.3%), Female: 281 (46.7%)	Male: 315 (62.2%), Female: 281 (37.8%)	Male: 315 (51.1%), Female: 281 (48.9%)	Male: 315 (58.9%), Female: 281 (41.1%)	Male: 315 (45.6%), Female: 281 (54.4%)	Male: 315 (43.3%), Female: 281 (56.7%)	Male: 315 (40%), Female: 281 (60%)	Male: 315 (55.7%), Female: 281 (44.3%)	Male: 315 (46.7%), Female: 281 (53.3%)	Male: 315 (60%), Female: 281 (40%)
