# Supplementary material for: Ancestral trajectory of infant gut microbiome assembly in non-industrialised populations
Source: Research Square preprint supplement (doi:10.21203/rs.3.rs-6675732/v1), 2025-05-30
Supplement: Supplementary file 13 [file dfad1eb145081f53353aa7d3.xlsx]

## Sheet: Sheet1
ko:K22114	ko:K00826	ko:K01869	ko:K00263	ko:K11258	ko:K01653	ko:K09011	ko:K14260	ko:K00835	ko:K01703	ko:K00053	ko:K01754	ko:K01649	ko:K01704	ko:K01652	ko:K17989	ko:K00052	ko:K01687	ko:K00813	ko:K00505	ko:K11779	ko:K00817	ko:K16423	ko:K00832	ko:K18933	ko:K11781	ko:K00220	ko:K01668	ko:K00500	ko:K00812	ko:K11358	ko:K10774	ko:K21181	ko:K14455	ko:K01593	ko:K01866	ko:K15227	ko:K00270	ko:K15226	ko:K03150	ko:K14266	ko:K01867	ko:K01696	ko:K00453	ko:K00466	ko:K01667	ko:K01695	ko:K00463	ko:K06001	ko:K01889
0	0.000701013	0.000818276	3.28154e-06	2.59558e-06	6.57519e-05	1.55728e-05	0.000901018	5.33024e-05	0.000281291	0.000447653	0.000381635	0.000605341	0.000210194	0.000643732	0	0.000232361	0.000682119	2.84983e-05	1.64171e-09	2.68966e-08	0.000317646	1.92362e-09	0.00016831	0	0	1.09537e-06	9.08426e-07	5.19096e-08	0.00101563	7.83611e-05	8.86196e-07	1.49458e-09	6.12226e-08	1.941e-07	0.000247749	9.29503e-07	0	0	0.00011716	7.93456e-10	0.000415576	0.000430982	9.05133e-08	0	5.49487e-05	0.000104515	5.15376e-10	1.45433e-05	0.000220847
0	0.000689092	0.000798053	9.44217e-08	3.05014e-06	7.77725e-05	2.54971e-05	0.000750371	6.00649e-05	0.000305056	0.000413685	0.000418914	0.000605693	0.000211908	0.000713271	0	0.000230032	0.000674437	3.55727e-05	1.86301e-07	4.22467e-08	0.000327253	1.3885e-07	0.000191923	1.6605e-07	0	4.55308e-07	1.16113e-06	4.07085e-07	0.000913875	8.48235e-05	5.28792e-06	0	3.94451e-08	6.38623e-08	0.000252878	6.31652e-07	0	6.00471e-08	0.000151354	2.01193e-07	0.000406913	0.000416844	3.00382e-07	4.24466e-09	5.54122e-05	0.000115031	0	2.10589e-05	0.000230444
2.08448e-08	0.000602941	0.000789269	1.18278e-07	1.70668e-06	9.00184e-05	4.3121e-05	0.00068275	4.22286e-05	0.000374564	0.000393777	0.00036219	0.000556261	0.000178466	0.000674603	0	0.000235162	0.000659198	2.05453e-05	2.75885e-08	8.67086e-08	0.000354721	9.67436e-09	0.000172458	8.65261e-08	1.12966e-07	1.41298e-07	2.05134e-06	1.42395e-07	0.000853872	0.000105348	5.65334e-06	0	9.66239e-08	2.10511e-08	0.000317494	1.17939e-06	0	3.94581e-08	0.000166456	6.57805e-08	0.00037817	0.000384995	5.66026e-08	6.43143e-07	4.76382e-05	0.000144353	0	4.05237e-05	0.000234519
0	0.000568465	0.000778393	4.66465e-07	1.32314e-06	0.000106426	5.07544e-05	0.000668816	4.08654e-05	0.000353823	0.000390458	0.000399548	0.000546166	0.000178264	0.000672845	9.55591e-10	0.000233214	0.000618003	2.24836e-05	4.94638e-08	4.32909e-08	0.000368204	1.43596e-08	0.00019361	9.3025e-08	7.74449e-08	3.763e-07	1.71823e-06	1.48888e-07	0.000816501	0.000120277	5.33914e-06	0	2.5516e-08	1.75836e-07	0.000325145	1.90046e-06	5.50798e-10	4.62709e-07	0.000185084	4.73477e-08	0.000374156	0.00037806	1.14533e-07	2.83593e-09	4.88352e-05	0.000159722	0	4.57086e-05	0.000236244
0	0.00051092	0.000788486	6.71514e-07	1.61729e-06	0.00011652	7.3703e-05	0.000594297	3.26527e-05	0.000353902	0.000372584	0.000403323	0.000530687	0.000170866	0.000714849	5.92296e-10	0.000245501	0.00060194	1.95667e-05	2.20958e-07	8.82748e-08	0.000363235	3.32748e-08	0.000172919	1.11772e-07	1.25565e-07	5.19732e-07	3.60305e-06	1.04114e-07	0.000751575	0.000130715	4.5511e-06	0	2.32791e-08	5.18932e-08	0.000350976	6.55423e-07	0	9.10315e-08	0.00019855	1.40875e-07	0.000338906	0.000349436	4.32712e-08	9.5015e-08	3.81111e-05	0.000187006	0	6.25593e-05	0.000231877
0	0.000506384	0.000797014	3.78188e-07	5.59862e-07	0.000134173	7.36202e-05	0.000600058	1.94892e-05	0.000408296	0.000369745	0.000393028	0.000500121	0.000144312	0.000665784	2.04496e-09	0.000250624	0.000595854	1.08788e-05	2.80633e-07	9.51047e-08	0.0003891	7.75336e-09	0.000140666	7.15784e-08	9.08002e-10	3.0629e-07	3.23385e-06	5.10414e-08	0.000769509	0.00016168	6.42586e-06	0	1.7028e-08	3.72233e-08	0.000343042	5.07506e-07	0	6.00433e-07	0.000200724	1.62862e-07	0.000326552	0.00035926	3.59972e-08	5.79969e-09	3.15652e-05	0.00018613	1.77933e-09	6.95198e-05	0.000245389
1.42995e-09	0.000462027	0.000751741	7.58068e-07	9.3701e-07	0.000124954	9.59619e-05	0.000500186	2.40876e-05	0.000404108	0.000325789	0.000369737	0.000445665	0.000130444	0.000670421	6.38754e-10	0.000228264	0.000529378	1.52832e-05	4.23195e-07	7.1852e-08	0.000349148	2.52316e-08	0.000127192	1.14284e-07	5.66389e-10	6.83506e-07	3.77499e-06	1.10178e-07	0.000626151	0.000149469	1.10758e-05	0	2.33144e-09	9.23326e-08	0.000331617	4.08237e-07	0	2.59896e-07	0.000228503	2.55743e-07	0.00028904	0.00032171	2.18348e-08	2.80482e-08	3.77505e-05	0.000196726	0	9.1965e-05	0.000237384
0	0.000449131	0.000788899	3.56771e-07	4.97099e-07	0.000137984	9.7539e-05	0.000501438	1.4713e-05	0.000436358	0.000334464	0.000385707	0.000440905	0.00014476	0.000642364	8.87002e-10	0.000255172	0.000552701	1.1883e-05	2.61668e-07	7.80314e-08	0.00036298	2.28474e-09	0.000117963	1.02189e-07	5.636e-09	8.47158e-07	2.22666e-06	1.31089e-07	0.000634838	0.000162508	7.06484e-06	0	2.34846e-08	5.04978e-08	0.000348155	5.70954e-07	0	7.5468e-07	0.000220204	8.75399e-08	0.000301346	0.000339869	3.46013e-08	6.99149e-10	2.57512e-05	0.000193907	0	8.82738e-05	0.000241795
0	0.000437467	0.00075188	2.21049e-07	7.90529e-07	0.000138171	9.82031e-05	0.000395739	2.02091e-05	0.000450032	0.000312152	0.000359191	0.000423067	0.000134765	0.000684991	0	0.000237781	0.000521996	1.6177e-05	4.89292e-07	7.67894e-08	0.000337374	2.1599e-07	0.000120273	1.56462e-07	3.30862e-09	1.77985e-06	3.25237e-06	3.28097e-08	0.00050452	0.000151765	1.51733e-05	0	1.13193e-08	1.16627e-07	0.000334979	8.33359e-07	6.55992e-10	2.08702e-06	0.000272336	2.75189e-07	0.000291661	0.000299363	2.80665e-08	4.73635e-09	3.7698e-05	0.000197176	0	0.000102915	0.000242955
0	0.000420738	0.000796226	6.00876e-07	2.18866e-06	0.000133307	0.000107251	0.000390738	1.49382e-05	0.000449904	0.00029184	0.000356341	0.0004203	0.000132339	0.000673227	2.85528e-09	0.000247821	0.000512085	1.19137e-05	3.65312e-07	1.30201e-07	0.000332913	8.92571e-09	0.000131922	2.68489e-07	0	1.0088e-06	5.40826e-06	3.28256e-08	0.000522683	0.000153104	1.11532e-05	1.07387e-09	8.11584e-08	1.0954e-07	0.000348034	1.91228e-06	0	6.57813e-07	0.000254401	4.88116e-08	0.000288179	0.000297882	2.99917e-08	6.06014e-08	3.1735e-05	0.000195639	1.68965e-09	0.000106794	0.000245517
0	0.000415918	0.000767101	5.72812e-07	5.94968e-07	0.000128269	0.000136998	0.000320317	1.29452e-05	0.000440894	0.000256633	0.000301432	0.00036875	0.000124122	0.000591458	8.39733e-09	0.000233564	0.000461501	1.06462e-05	8.69228e-07	1.07257e-07	0.000305389	7.46865e-09	8.24571e-05	2.77389e-07	2.34395e-07	1.54218e-06	2.90263e-06	1.49698e-07	0.000436175	0.000138538	1.23804e-05	0	0	1.63229e-07	0.000330966	4.52322e-07	8.97265e-10	2.78639e-06	0.000279278	8.92869e-08	0.000265848	0.000280117	2.1655e-08	1.58102e-07	3.00678e-05	0.000195386	0	0.000135223	0.000227378
[truncated: 393 more columns]
