# Supplementary material for: Ancestral trajectory of infant gut microbiome assembly in non-industrialised populations
Source: Research Square preprint supplement (doi:10.21203/rs.3.rs-6675732/v1), 2025-05-30
Supplement: Supplementary file 14 [file e9f0447af109895299284744.xlsx]

## Sheet: Sheet1
genome_name	domain	phylum	class	order	family	genus	species	sample_id	n50	contigs	completeness	contamination	source
GCA_900552395.1	d__Bacteria	p__Actinomycetota	c__Coriobacteriia	o__Coriobacteriales	f__Coriobacteriaceae	g__Collinsella	s__Collinsella sp900552395		9637	238	85.72	2.42	gtdb
GCF_003464165.1	d__Bacteria	p__Bacillota_A	c__Clostridia	o__Lachnospirales	f__Lachnospiraceae	g__Lachnospira	s__Lachnospira sp003451515		65765	101	97.76	0	gtdb
GCF_003481985.1	d__Bacteria	p__Bacillota_A	c__Clostridia	o__Lachnospirales	f__Lachnospiraceae	g__Ventrimonas	s__Ventrimonas sp003506385		122238	98	95.99	1.27	gtdb
GCF_011064845.1	d__Bacteria	p__Pseudomonadota	c__Gammaproteobacteria	o__Enterobacterales	f__Enterobacteriaceae	g__Citrobacter	s__Citrobacter freundii		4957773	1	99.9	0.48	gtdb
GCA_900550935.1	d__Bacteria	p__Bacillota_A	c__Clostridia	o__Lachnospirales	f__Lachnospiraceae	g__Roseburia	s__Roseburia sp900550935		46778	87	93.89	3.2	gtdb
GCF_003143695.2	d__Bacteria	p__Bacillota	c__Bacilli	o__Lactobacillales	f__Streptococcaceae	g__Streptococcus	s__Streptococcus halitosis		1331771	19	99.87	0.2	gtdb
GCA_900546925.1	d__Bacteria	p__Bacteroidota	c__Bacteroidia	o__Bacteroidales	f__UBA932	g__Cryptobacteroides	s__Cryptobacteroides sp900546925		84727	40	90	0.48	gtdb
GCF_001074805.1	d__Bacteria	p__Bacillota	c__Bacilli	o__Lactobacillales	f__Streptococcaceae	g__Streptococcus	s__Streptococcus parasanguinis_A		25447	158	100	0	gtdb
GCF_000188295.1	d__Bacteria	p__Bacillota	c__Bacilli	o__Lactobacillales	f__Streptococcaceae	g__Streptococcus	s__Streptococcus vestibularis		38245	102	99.38	0.15	gtdb
GCA_019412865.1	d__Bacteria	p__Bacteroidota	c__Bacteroidia	o__Bacteroidales	f__Bacteroidaceae	g__Bacteroides	s__Bacteroides sp019412865		7767	991	74.6	1.19	gtdb
GCF_000426485.1	d__Bacteria	p__Bacteroidota	c__Bacteroidia	o__Bacteroidales	f__Dysgonomonadaceae	g__Dysgonomonas	s__Dysgonomonas capnocytophagoides		216924	41	100	0	gtdb
GCF_000763055.1	d__Bacteria	p__Actinomycetota	c__Coriobacteriia	o__Coriobacteriales	f__Coriobacteriaceae	g__Collinsella	s__Collinsella sp000763055		65975	105	99.19	0.81	gtdb
GCA_944381485.1	d__Bacteria	p__Bacillota_A	c__Clostridia	o__Lachnospirales	f__Lachnospiraceae	g__Avilachnospira	s__Avilachnospira sp944381485		84670	41	93.6	0.21	gtdb
GCA_934572335.1	d__Bacteria	p__Bacillota_A	c__Clostridia	o__Oscillospirales	f__Oscillospiraceae	g__Limivicinus	s__Limivicinus sp934572335		77463	37	90.18	0.81	gtdb
GCA_944327175.1	d__Bacteria	p__Bacillota	c__Bacilli	o__Lactobacillales	f__Lactobacillaceae	g__Lactobacillus	s__Lactobacillus sp944327175		46233	66	98.44	0.16	gtdb
GCF_000821305.1	d__Bacteria	p__Bacillota_A	c__Clostridia	o__Clostridiales	f__Clostridiaceae	g__Clostridium_J	s__Clostridium_J culturomicium		695847	17	98.46	1.55	gtdb
GCF_001078375.1	d__Bacteria	p__Bacillota_C	c__Negativicutes	o__Veillonellales	f__Veillonellaceae	g__Veillonella	s__Veillonella tobetsuensis		225588	49	100	0.6	gtdb
GCF_003287405.1	d__Bacteria	p__Bacillota_A	c__Clostridia	o__Oscillospirales	f__Ruminococcaceae	g__Faecalibacterium	s__Faecalibacterium prausnitzii_J		173521	70	99.32	0	gtdb
GCA_900540635.1	d__Bacteria	p__Bacillota_A	c__Clostridia	o__Oscillospirales	f__Oscillospiraceae	g__Faecousia	s__Faecousia sp900540635		45849	98	99.5	0.67	gtdb
GCA_900542945.1	d__Bacteria	p__Actinomycetota	c__Coriobacteriia	o__Coriobacteriales	f__Coriobacteriaceae	g__Collinsella	s__Collinsella sp900542945		33358	110	97.58	0.81	gtdb
GCA_900763685.1	d__Bacteria	p__Bacillota_A	c__Clostridia	o__Oscillospirales	f__Oscillospiraceae	g__Dysosmobacter	s__Dysosmobacter sp900763685		40614	48	60.07	0.89	gtdb
GCA_900760385.1	d__Bacteria	p__Actinomycetota	c__Coriobacteriia	o__Coriobacteriales	f__Coriobacteriaceae	g__Collinsella	s__Collinsella sp900760385		15812	167	89.01	0.27	gtdb
GCA_900552185.1	d__Bacteria	p__Actinomycetota	c__Coriobacteriia	o__Coriobacteriales	f__Coriobacteriaceae	g__Collinsella	s__Collinsella sp900552185		10670	207	88.19	2.78	gtdb
GCA_900543275.1	d__Bacteria	p__Actinomycetota	c__Coriobacteriia	o__Coriobacteriales	f__Coriobacteriaceae	g__Collinsella	s__Collinsella sp900543275		25208	127	97.24	0.81	gtdb
GCA_019425015.1	d__Bacteria	p__Actinomycetota	c__Coriobacteriia	o__Coriobacteriales	f__Coriobacteriaceae	g__Collinsella	s__Collinsella sp019425015		136945	28	100	0.81	gtdb
GCA_900544845.1	d__Bacteria	p__Actinomycetota	c__Coriobacteriia	o__Coriobacteriales	f__Coriobacteriaceae	g__Collinsella	s__Collinsella sp900544845		31137	124	96.57	1.08	gtdb
GCF_016899775.1	d__Bacteria	p__Bacillota_A	c__Clostridia	o__Oscillospirales	f__Oscillospiraceae	g__Lawsonibacter	s__Lawsonibacter sp900545895		52453	201	99.33	0.34	gtdb
GCF_001953955.1	d__Bacteria	p__Bacteroidota	c__Bacteroidia	o__Bacteroidales	f__Bacteroidaceae	g__Prevotella	s__Prevotella intermedia		1965935	2	99.32	0.77	gtdb
GCF_009717815.1	d__Bacteria	p__Bacillota	c__Bacilli	o__Lactobacillales	f__Streptococcaceae	g__Streptococcus	s__Streptococcus parasanguinis_F		340767	13	100	0	gtdb
GCA_900539645.1	d__Bacteria	p__Bacillota_A	c__Clostridia	o__Peptostreptococcales	f__Peptostreptococcaceae	g__Peptacetobacter	s__Peptacetobacter sp900539645		12364	249	100	0.47	gtdb
GCF_009695545.1	d__Bacteria	p__Verrucomicrobiota	c__Lentisphaeria	o__Victivallales	f__Victivallaceae	g__Victivallis	s__Victivallis lenta		157075	78	94.59	3.15	gtdb
GCA_002438605.1	d__Bacteria	p__Bacillota_A	c__Clostridia	o__Oscillospirales	f__Ruminococcaceae	g__Ruminococcus	s__Ruminococcus sp002438605		40247	91	97.99	0	gtdb
GCF_014982855.1	d__Bacteria	p__Bacillota_A	c__Clostridia	o__Oscillospirales	f__Oscillospiraceae	g__Pseudoflavonifractor_A	s__Pseudoflavonifractor_A gallinarum		204069	31	99.33	0	gtdb
GCA_934101345.1	d__Bacteria	p__Bacillota	c__Bacilli	o__RF39	f__UBA660	g__CAG-302	s__CAG-302 sp934101345		21776	66	86.62	0	gtdb
GCA_019419585.1	d__Bacteria	p__Actinomycetota	c__Coriobacteriia	o__Coriobacteriales	f__Coriobacteriaceae	g__Collinsella	s__Collinsella sp019419585		74457	50	99.54	0.81	gtdb
GCA_900552195.1	d__Bacteria	p__Pseudomonadota	c__Gammaproteobacteria	o__Burkholderiales	f__Burkholderiaceae_A	g__Parasutterella	s__Parasutterella sp900552195		7765	195	74.3	0	gtdb
GCA_900478215.1	d__Bacteria	p__Pseudomonadota	c__Gammaproteobacteria	o__Enterobacterales	f__Enterobacteriaceae	g__Salmonella	s__Salmonella houtenae		4624613	1	100	0.38	gtdb
GCA_900765465.1	d__Bacteria	p__Bacteroidota	c__Bacteroidia	o__Bacteroidales	f__Bacteroidaceae	g__Prevotella	s__Prevotella sp900765465		9873	369	68.52	1.17	gtdb
GCA_905216145.1	d__Bacteria	p__Actinomycetota	c__Coriobacteriia	o__Coriobacteriales	f__Coriobacteriaceae	g__Collinsella	s__Collinsella sp905216145		79050	43	100	0.81	gtdb
GCA_025144665.1	d__Bacteria	p__Bacteroidota	c__Bacteroidia	o__Bacteroidales	f__Rikenellaceae	g__Alistipes_A	s__Alistipes_A ihumii		2780015	1	100	0.48	gtdb
GCA_900761995.1	d__Bacteria	p__Actinomycetota	c__Coriobacteriia	o__Coriobacteriales	f__Coriobacteriaceae	g__Collinsella	s__Collinsella sp900761995		20072	194	95.05	4.84	gtdb
GCF_022174665.1	d__Bacteria	p__Bacillota_A	c__Clostridia	o__Lachnospirales	f__Lachnospiraceae	g__Wujia	s__Wujia sp022174665		2908239	1	98.66	0	gtdb
GCA_900543815.1	d__Bacteria	p__Bacteroidota	c__Bacteroidia	o__Bacteroidales	f__Bacteroidaceae	g__UBA4372	s__UBA4372 sp900543815		61669	72	96.16	0.74	gtdb
GCA_900547765.1	d__Bacteria	p__Actinomycetota	c__Coriobacteriia	o__Coriobacteriales	f__Coriobacteriaceae	g__Collinsella	s__Collinsella sp900547765		36082	80	98.39	2.49	gtdb
GCF_003480315.1	d__Bacteria	p__Bacillota_A	c__Clostridia	o__Lachnospirales	f__Lachnospiraceae	g__Ventrimonas	s__Ventrimonas sp003480315		82436	89	99.37	0	gtdb
GCF_000069945.1	d__Bacteria	p__Actinomycetota	c__Actinomycetia	o__Mycobacteriales	f__Mycobacteriaceae	g__Corynebacterium	s__Corynebacterium urealyticum		2369219	1	100	0	gtdb
GCF_900184965.1	d__Bacteria	p__Verrucomicrobiota	c__Verrucomicrobiae	o__Verrucomicrobiales	f__Akkermansiaceae	g__Akkermansia	s__Akkermansia muciniphila_A		181108	218	97.96	2.04	gtdb
GCF_020892095.1	d__Bacteria	p__Bacillota_A	c__Clostridia	o__Lachnospirales	f__Lachnospiraceae	g__Lachnoclostridium_B	s__Lachnoclostridium_B faecipullorum		3042110	1	98.25	0.88	gtdb
GCA_905214615.1	d__Bacteria	p__Actinomycetota	c__Coriobacteriia	o__Coriobacteriales	f__Coriobacteriaceae	g__Collinsella	s__Collinsella sp905214615		29819	112	99.19	2.42	gtdb
GCA_019425005.1	d__Bacteria	p__Actinomycetota	c__Coriobacteriia	o__Coriobacteriales	f__Coriobacteriaceae	g__Collinsella	s__Collinsella sp019425005		29269	118	99.46	1.61	gtdb
GCA_902406155.1	d__Bacteria	p__Actinomycetota	c__Coriobacteriia	o__Coriobacteriales	f__Coriobacteriaceae	g__Collinsella	s__Collinsella sp900554155		22790	156	97.58	0.81	gtdb
GCA_900538765.1	d__Bacteria	p__Pseudomonadota	c__Alphaproteobacteria	o__RF32	f__CAG-239	g__HGM16780	s__HGM16780 sp900538765		58837	51	98.92	0	gtdb
GCF_002355215.1	d__Bacteria	p__Bacillota	c__Bacilli	o__Lactobacillales	f__Streptococcaceae	g__Streptococcus	s__Streptococcus troglodytae		2097874	1	99.91	0.37	gtdb
GCA_900540005.1	d__Bacteria	p__Bacillota_A	c__Clostridia	o__Oscillospirales	f__Ruminococcaceae	g__Ruminococcus	s__Ruminococcus sp900540005		14931	233	97.07	0	gtdb
GCA_003524145.1	d__Bacteria	p__Bacillota_A	c__Clostridia	o__Oscillospirales	f__CAG-272	g__CAG-724	s__CAG-724 sp003524145		42930	117	86.13	0	gtdb
GCA_019414865.1	d__Bacteria	p__Bacillota_C	c__Negativicutes	o__Veillonellales	f__Veillonellaceae	g__Veillonella	s__Veillonella sp019414865		12394	225	96.05	0	gtdb
GCA_015058545.1	d__Bacteria	p__Bacillota_C	c__Negativicutes	o__Veillonellales	f__Veillonellaceae	g__Veillonella_A	s__Veillonella_A sp015058545		16485	149	92.72	0	gtdb
GCF_002860865.1	d__Bacteria	p__Bacillota	c__Bacilli	o__Lactobacillales	f__Streptococcaceae	g__Streptococcus	s__Streptococcus mitis_AT		295675	27	99.82	0.2	gtdb
GCA_018364485.1	d__Bacteria	p__Bacillota	c__Bacilli	o__Lactobacillales	f__Aerococcaceae	g__Granulicatella	s__Granulicatella adiacens_A		24686	107	94.81	0	gtdb
GCA_944392655.1	d__Bacteria	p__Verrucomicrobiota	c__Lentisphaeria	o__Victivallales	f__Victivallaceae	g__CALXXL01	s__CALXXL01 sp944392655		122094	37	93.89	2.03	gtdb
GCA_905215325.1	d__Bacteria	p__Actinomycetota	c__Coriobacteriia	o__Coriobacteriales	f__Eggerthellaceae	g__Senegalimassilia	s__Senegalimassilia sp905215325		53938	57	94.35	0.9	gtdb
GCF_001717505.1	d__Bacteria	p__Bacillota_C	c__Negativicutes	o__Veillonellales	f__Dialisteraceae	g__Allisonella	s__Allisonella pneumosinta		1274073	1	96.11	0	gtdb
GCA_900554465.1	d__Bacteria	p__Actinomycetota	c__Coriobacteriia	o__Coriobacteriales	f__Coriobacteriaceae	g__Collinsella	s__Collinsella sp900554465		7808	263	79.13	2.6	gtdb
GCF_006542665.1	d__Bacteria	p__Bacteroidota	c__Bacteroidia	o__Bacteroidales	f__Rikenellaceae	g__Alistipes	s__Alistipes communis		3301347	1	100	0.48	gtdb
GCA_900553955.1	d__Bacteria	p__Bacillota_A	c__Clostridia	o__Oscillospirales	f__Ruminococcaceae	g__UMGS1668	s__UMGS1668 sp900553955		15611	151	81.7	2.68	gtdb
GCA_900766495.1	d__Bacteria	p__Bacillota_A	c__Clostridia	o__Christensenellales	f__Borkfalkiaceae	g__HGM11416	s__HGM11416 sp900766495		44955	58	81.61	0	gtdb
GCF_000220255.1	d__Bacteria	p__Bacteroidota	c__Bacteroidia	o__Bacteroidales	f__Bacteroidaceae	g__Prevotella	s__Prevotella pallens		39499	168	99.66	0.49	gtdb
GCA_900543505.1	d__Bacteria	p__Actinomycetota	c__Coriobacteriia	o__Coriobacteriales	f__Coriobacteriaceae	g__Collinsella	s__Collinsella sp900543505		35055	85	99.19	1.28	gtdb
GCA_900555735.1	d__Bacteria	p__Bacillota_A	c__Clostridia	o__Oscillospirales	f__Oscillospiraceae	g__Vescimonas	s__Vescimonas sp900555735		11950	238	81.26	4.19	gtdb
GCA_934408725.1	d__Bacteria	p__Bacillota_A	c__Clostridia	o__Lachnospirales	f__Lachnospiraceae	g__Marvinbryantia	s__Marvinbryantia sp934408725		63651	64	89.96	0	gtdb
GCA_934394515.1	d__Bacteria	p__Bacillota_A	c__Clostridia	o__Lachnospirales	f__Lachnospiraceae	g__Acetatifactor	s__Acetatifactor sp934394515		19579	185	58.41	0	gtdb
GCF_009738225.1	d__Bacteria	p__Bacillota	c__Bacilli	o__Lactobacillales	f__Streptococcaceae	g__Streptococcus	s__Streptococcus sp001556435		2254697	2	99.56	1.12	gtdb
GCA_022009775.1	d__Bacteria	p__Bacillota_A	c__Clostridia	o__Christensenellales	f__CAG-917	g__CAG-475	s__CAG-475 sp900550915		1647114	1	83.42	2.68	gtdb
GCF_006742205.1	d__Bacteria	p__Bacillota	c__Bacilli	o__Staphylococcales	f__Staphylococcaceae	g__Staphylococcus	s__Staphylococcus epidermidis		2422602	2	99.81	0	gtdb
GCA_003150175.1	d__Bacteria	p__Actinomycetota	c__Coriobacteriia	o__Coriobacteriales	f__Atopobiaceae	g__Paratractidigestivibacter	s__Paratractidigestivibacter sp003150175		26215	104	95.37	1.61	gtdb
GCF_900106585.1	d__Bacteria	p__Bacillota_C	c__Negativicutes	o__Acidaminococcales	f__Acidaminococcaceae	g__Acidaminococcus	s__Acidaminococcus timonensis		1482755	6	100	0	gtdb
GCA_900544755.1	d__Bacteria	p__Actinomycetota	c__Coriobacteriia	o__Coriobacteriales	f__Coriobacteriaceae	g__Collinsella	s__Collinsella sp900544755		20645	146	95.97	0.95	gtdb
GCA_934654765.1	d__Bacteria	p__Actinomycetota	c__Coriobacteriia	o__Coriobacteriales	f__Coriobacteriaceae	g__Collinsella	s__Collinsella sp934654765		15918	183	86.29	0	gtdb
GCA_905216045.1	d__Bacteria	p__Actinomycetota	c__Coriobacteriia	o__Coriobacteriales	f__Coriobacteriaceae	g__Collinsella	s__Collinsella sp905216045		12546	222	95.43	2.45	gtdb
GCA_900752275.1	d__Bacteria	p__Actinomycetota	c__Coriobacteriia	o__Coriobacteriales	f__Coriobacteriaceae	g__Collinsella	s__Collinsella sp900752275		9482	259	86.29	5.79	gtdb
GCA_900550445.1	d__Bacteria	p__Pseudomonadota	c__Alphaproteobacteria	o__RF32	f__CAG-977	g__UBA11549	s__UBA11549 sp900550445		56640	51	80.72	0.29	gtdb
GCA_905214955.1	d__Bacteria	p__Bacillota_A	c__Clostridia	o__Lachnospirales	f__Lachnospiraceae	g__Limivivens	s__Limivivens sp905214955		37725	128	93.04	0	gtdb
GCA_900550615.1	d__Bacteria	p__Bacillota_A	c__Clostridia	o__Oscillospirales	f__Oscillospiraceae	g__Vescimonas	s__Vescimonas sp900550615		17638	138	86.63	1.54	gtdb
GCF_000469305.1	d__Bacteria	p__Bacillota	c__Bacilli	o__Erysipelotrichales	f__Erysipelotrichaceae	g__Faecalitalea	s__Faecalitalea cylindroides		42016	143	97.88	1.35	gtdb
GCF_000321025.1	d__Bacteria	p__Bacillota_A	c__Clostridia	o__Tissierellales	f__Peptoniphilaceae	g__Peptoniphilus_A	s__Peptoniphilus_A senegalensis		90361	64	98.95	0	gtdb
GCF_003641185.1	d__Bacteria	p__Bacillota	c__Bacilli	o__Lactobacillales	f__Lactobacillaceae	g__Lactiplantibacillus	s__Lactiplantibacillus pentosus		3622107	2	99.38	2.16	gtdb
GCA_905209765.1	d__Bacteria	p__Actinomycetota	c__Coriobacteriia	o__Coriobacteriales	f__Coriobacteriaceae	g__Collinsella	s__Collinsella sp905209765		21820	191	99.19	1.52	gtdb
GCA_008668235.1	d__Bacteria	p__Actinomycetota	c__Coriobacteriia	o__Coriobacteriales	f__Coriobacteriaceae	g__Collinsella	s__Collinsella aerofaciens_K		51823	67	96.81	1.61	gtdb
GCA_000433675.1	d__Bacteria	p__Bacillota	c__Bacilli	o__RF39	f__UBA660	g__CAG-433	s__CAG-433 sp000433675		44850	49	93.82	0.56	gtdb
GCA_900556625.1	d__Bacteria	p__Bacteroidota	c__Bacteroidia	o__Bacteroidales	f__Bacteroidaceae	g__Bacteroides	s__Bacteroides sp900556625		26773	169	56.21	0	gtdb
GCA_902835305.1	d__Bacteria	p__Actinomycetota	c__Coriobacteriia	o__Coriobacteriales	f__Coriobacteriaceae	g__Collinsella	s__Collinsella sp902835305		146507	27	100	0.81	gtdb
GCA_901875575.1	d__Bacteria	p__Bacillota	c__Bacilli	o__Lactobacillales	f__Streptococcaceae	g__Streptococcus	s__Streptococcus sp901875575		69389	80	99.83	1.29	gtdb
GCA_000803105.1	d__Bacteria	p__Bacteroidota	c__Bacteroidia	o__Bacteroidales	f__Coprobacteraceae	g__Coprobacter	s__Coprobacter secundus		234174	45	99.5	0	gtdb
GCA_000432915.1	d__Bacteria	p__Bacillota_A	c__Clostridia	o__Lachnospirales	f__Lachnospiraceae	g__CAG-194	s__CAG-194 sp000432915		41950	106	99.38	2.42	gtdb
GCA_915069625.1	d__Bacteria	p__Bacillota_C	c__Negativicutes	o__Veillonellales	f__Veillonellaceae	g__Veillonella	s__Veillonella sp915069625		10598	215	96.34	1.65	gtdb
GCA_934503275.1	d__Bacteria	p__Bacillota_A	c__Clostridia	o__Oscillospirales	f__Ruminococcaceae	g__Faecalibacterium	s__Faecalibacterium sp934503275		80364	71	96	0.68	gtdb
GCF_018918145.1	d__Bacteria	p__Bacillota_A	c__Clostridia	o__Lachnospirales	f__Anaerotignaceae	g__Metalachnospira	s__Metalachnospira sp900553995		375966	11	93.96	0.22	gtdb
GCA_900544385.1	d__Bacteria	p__Actinomycetota	c__Coriobacteriia	o__Coriobacteriales	f__Coriobacteriaceae	g__Collinsella	s__Collinsella sp900544385		19842	147	91.67	0	gtdb
GCA_905193765.1	d__Bacteria	p__Bacillota_A	c__Clostridia	o__Peptostreptococcales	f__Anaerovoracaceae	g__Lentihominibacter	s__Lentihominibacter sp905193765		13015	268	92.33	1.42	gtdb
GCF_009883055.1	d__Bacteria	p__Bacillota_A	c__Clostridia	o__Lachnospirales	f__Lachnospiraceae	g__Blautia_A	s__Blautia_A sp900548245		92005	105	99.37	0	gtdb
GCA_900552845.1	d__Bacteria	p__Bacillota_A	c__Clostridia	o__Oscillospirales	f__Ruminococcaceae	g__Angelakisella	s__Angelakisella sp900552845		10753	209	81.4	1.9	gtdb
GCA_934591895.1	d__Bacteria	p__Bacillota_A	c__Clostridia	o__Oscillospirales	f__Oscillospiraceae	g__CAG-103	s__CAG-103 sp934591895		168882	21	95.97	0.67	gtdb
GCA_905215765.1	d__Bacteria	p__Actinomycetota	c__Coriobacteriia	o__Coriobacteriales	f__Coriobacteriaceae	g__Collinsella	s__Collinsella sp905215765		14568	222	99.19	4.44	gtdb
GCA_900545075.1	d__Bacteria	p__Actinomycetota	c__Coriobacteriia	o__Coriobacteriales	f__Coriobacteriaceae	g__Collinsella	s__Collinsella sp900545075		19053	188	96.1	1.04	gtdb
GCA_905213265.1	d__Bacteria	p__Actinomycetota	c__Coriobacteriia	o__Coriobacteriales	f__Coriobacteriaceae	g__Collinsella	s__Collinsella sp905213265		43355	107	99.19	0.81	gtdb
GCA_900757705.1	d__Bacteria	p__Actinomycetota	c__Coriobacteriia	o__Coriobacteriales	f__Coriobacteriaceae	g__Collinsella	s__Collinsella sp900757705		15403	186	85.48	0.92	gtdb
GCA_900542315.1	d__Bacteria	p__Actinomycetota	c__Coriobacteriia	o__Coriobacteriales	f__Coriobacteriaceae	g__Collinsella	s__Collinsella sp900542315		47649	76	98.39	0.81	gtdb
GCA_900768265.1	d__Bacteria	p__Actinomycetota	c__Coriobacteriia	o__Coriobacteriales	f__Coriobacteriaceae	g__Collinsella	s__Collinsella sp900768265		76801	45	94.35	1.21	gtdb
GCA_900546775.1	d__Bacteria	p__Actinomycetota	c__Coriobacteriia	o__Coriobacteriales	f__Coriobacteriaceae	g__Collinsella	s__Collinsella sp900546775		46630	61	91.94	0.81	gtdb
GCA_934372025.1	d__Bacteria	p__Bacillota_A	c__Clostridia	o__Lachnospirales	f__Lachnospiraceae	g__Blautia_A	s__Blautia_A sp934372025		35735	119	94.07	0	gtdb
GCA_000526575.1	d__Bacteria	p__Bacillota_A	c__Clostridia	o__Lachnospirales	f__Lachnospiraceae	g__Lacrimispora	s__Lacrimispora sp000526575		3532345	3	99.37	0	gtdb
GCA_934183325.1	d__Bacteria	p__Bacillota_A	c__Clostridia	o__TANB77	f__CAG-508	g__CAKPSH01	s__CAKPSH01 sp934183325		66869	37	78.12	0.45	gtdb
GCA_021307345.1	d__Bacteria	p__Pseudomonadota	c__Gammaproteobacteria	o__Enterobacterales	f__Enterobacteriaceae	g__Escherichia	s__Escherichia ruysiae		4438520	1	100	0.04	gtdb
GCA_900759435.1	d__Bacteria	p__Actinomycetota	c__Coriobacteriia	o__Coriobacteriales	f__Coriobacteriaceae	g__Collinsella	s__Collinsella sp900759435		7352	286	83.33	1.81	gtdb
GCF_000834015.1	d__Bacteria	p__Bacteroidota	c__Bacteroidia	o__Bacteroidales	f__Bacteroidaceae	g__Prevotella	s__Prevotella pectinovora		104660	90	99.26	0.49	gtdb
GCA_000433115.1	d__Bacteria	p__Bacillota_A	c__Clostridia	o__Oscillospirales	f__CAG-382	g__UBA1206	s__UBA1206 sp000433115		10296	329	88.1	0	gtdb
GCF_001548235.1	d__Bacteria	p__Actinomycetota	c__Actinomycetia	o__Actinomycetales	f__Micrococcaceae	g__Rothia	s__Rothia mucilaginosa_B		2292716	1	99.33	2	gtdb
GCA_900547025.1	d__Bacteria	p__Actinomycetota	c__Coriobacteriia	o__Coriobacteriales	f__Coriobacteriaceae	g__Collinsella	s__Collinsella sp900547025		18364	159	87.58	0	gtdb
GCA_905221095.1	d__Bacteria	p__Bacillota	c__Bacilli	o__Lactobacillales	f__Streptococcaceae	g__Streptococcus	s__Streptococcus sp905221095		161283	117	99.42	0.2	gtdb
GCA_900553635.1	d__Bacteria	p__Bacillota_A	c__Clostridia	o__Lachnospirales	f__Lachnospiraceae	g__Merdisoma	s__Merdisoma sp900553635		11000	281	86.81	3.38	gtdb
GCA_934561205.1	d__Bacteria	p__Bacillota_A	c__Clostridia	o__Oscillospirales	f__Ruminococcaceae	g__Gemmiger	s__Gemmiger sp934561205		123192	30	94.56	0	gtdb
GCA_905221505.1	d__Bacteria	p__Bacillota	c__Bacilli	o__Lactobacillales	f__Streptococcaceae	g__Streptococcus	s__Streptococcus sp905221505		42542	160	99.82	0.68	gtdb
GCF_000770925.1	d__Bacteria	p__Actinomycetota	c__Actinomycetia	o__Actinomycetales	f__Bifidobacteriaceae	g__Bifidobacterium	s__Bifidobacterium ruminantium		101666	67	100	0.61	gtdb
GCF_003253005.1	d__Bacteria	p__Pseudomonadota	c__Gammaproteobacteria	o__Enterobacterales_A	f__Pasteurellaceae	g__Haemophilus_D	s__Haemophilus_D parainfluenzae_M		254895	21	99.89	0	gtdb
GCA_900541925.1	d__Bacteria	p__Bacteroidota	c__Bacteroidia	o__Bacteroidales	f__UBA932	g__Cryptobacteroides	s__Cryptobacteroides sp900541925		120357	29	95	0	gtdb
GCF_018408705.1	d__Bacteria	p__Bacillota_A	c__Clostridia	o__Oscillospirales	f__Oscillospiraceae	g__Dysosmobacter	s__Dysosmobacter faecalis		2891574	3	99.33	0	gtdb
GCF_001598295.1	d__Bacteria	p__Pseudomonadota	c__Gammaproteobacteria	o__Enterobacterales	f__Enterobacteriaceae	g__Klebsiella	s__Klebsiella ornithinolytica		350862	35	99.54	2.06	gtdb
GCA_934085675.1	d__Bacteria	p__Bacillota	c__Bacilli	o__RF39	f__UBA660	g__Ventrenecus	s__Ventrenecus sp934085675		106407	22	92.7	1.12	gtdb
GCA_934359255.1	d__Bacteria	p__Bacillota_A	c__Clostridia	o__Lachnospirales	f__Lachnospiraceae	g__Oliverpabstia	s__Oliverpabstia sp934359255		99043	47	92.69	0	gtdb
GCA_902399975.1	d__Bacteria	p__Actinomycetota	c__Coriobacteriia	o__Coriobacteriales	f__Coriobacteriaceae	g__Collinsella	s__Collinsella sp902399975		291842	24	100	0.81	gtdb
GCA_021639365.1	d__Bacteria	p__Actinomycetota	c__Coriobacteriia	o__Coriobacteriales	f__Coriobacteriaceae	g__Collinsella	s__Collinsella aerofaciens_AH		47331	78	98.79	0.81	gtdb
GCA_900541725.1	d__Bacteria	p__Actinomycetota	c__Coriobacteriia	o__Coriobacteriales	f__Coriobacteriaceae	g__Collinsella	s__Collinsella sp900541725		74134	44	99.19	0.81	gtdb
GCF_001171885.1	d__Bacteria	p__Bacillota	c__Bacilli	o__Lactobacillales	f__Streptococcaceae	g__Streptococcus	s__Streptococcus pneumoniae_A		146520	22	99.82	0.2	gtdb
GCA_900555035.1	d__Bacteria	p__Bacteroidota	c__Bacteroidia	o__Bacteroidales	f__Bacteroidaceae	g__Prevotella	s__Prevotella sp900555035		32413	155	63.1	0	gtdb
GCA_016297965.1	d__Bacteria	p__Pseudomonadota	c__Alphaproteobacteria	o__Rs-D84	f__CACZYB01	g__CACZYB01	s__CACZYB01 sp016297965		136783	18	94.51	0	gtdb
GCF_000027165.1	d__Bacteria	p__Bacillota	c__Bacilli	o__Lactobacillales	f__Streptococcaceae	g__Streptococcus	s__Streptococcus mitis_AR		2146611	1	99.82	0.2	gtdb
GCF_000423265.1	d__Bacteria	p__Bacillota	c__Bacilli	o__Lactobacillales	f__Lactobacillaceae	g__Ligilactobacillus	s__Ligilactobacillus saerimneri		49857	50	99.48	0	gtdb
GCF_008151785.1	d__Bacteria	p__Bacillota_A	c__Clostridia	o__Peptostreptococcales	f__Peptostreptococcaceae	g__Peptacetobacter	s__Peptacetobacter hiranonis		2521899	1	100	0	gtdb
GCA_934548045.1	d__Bacteria	p__Bacillota_A	c__Clostridia	o__Oscillospirales	f__Ruminococcaceae	g__Faecalibacterium	s__Faecalibacterium sp934548045		130269	37	98.68	0	gtdb
GCA_934650975.1	d__Bacteria	p__Actinomycetota	c__Coriobacteriia	o__Coriobacteriales	f__Coriobacteriaceae	g__Collinsella	s__Collinsella sp934650975		22623	170	86.29	2.42	gtdb
GCA_900553605.1	d__Bacteria	p__Actinomycetota	c__Coriobacteriia	o__Coriobacteriales	f__Eggerthellaceae	g__Anaerotardibacter	s__Anaerotardibacter sp900553605		97144	25	70.16	0.07	gtdb
GCA_930989465.1	d__Bacteria	p__Bacillota	c__Bacilli	o__Lactobacillales	f__Lactobacillaceae	g__Lactobacillus	s__Lactobacillus sp930989465		36039	59	65.52	0	gtdb
GCF_000368085.1	d__Bacteria	p__Pseudomonadota	c__Gammaproteobacteria	o__Pseudomonadales	f__Moraxellaceae	g__Acinetobacter	s__Acinetobacter nosocomialis		449703	19	100	0	gtdb
GCA_003507655.1	d__Bacteria	p__Bacillota_A	c__Clostridia	o__Lachnospirales	f__Lachnospiraceae	g__UBA11774	s__UBA11774 sp003507655		61868	68	93.96	1.52	gtdb
GCA_905208345.1	d__Bacteria	p__Actinomycetota	c__Coriobacteriia	o__Coriobacteriales	f__Coriobacteriaceae	g__Collinsella	s__Collinsella sp905208345		14709	214	95.32	2.02	gtdb
GCA_021619875.1	d__Bacteria	p__Bacteroidota	c__Bacteroidia	o__Bacteroidales	f__Bacteroidaceae	g__Prevotella	s__Prevotella copri_D		5516	922	80.59	5.48	gtdb
GCF_013618865.1	d__Bacteria	p__Bacteroidota	c__Bacteroidia	o__Bacteroidales	f__Bacteroidaceae	g__Phocaeicola	s__Phocaeicola faecicola		56745	178	98.88	0.31	gtdb
GCA_003573975.1	d__Bacteria	p__Bacillota_A	c__Clostridia	o__Oscillospirales	f__Oscillospiraceae	g__Lawsonibacter	s__Lawsonibacter sp900066825		3558314	1	98.66	0	gtdb
GCA_900540985.1	d__Bacteria	p__Actinomycetota	c__Coriobacteriia	o__Coriobacteriales	f__Coriobacteriaceae	g__Collinsella	s__Collinsella sp900540985		50824	58	100	0.81	gtdb
GCA_916719935.1	d__Bacteria	p__Actinomycetota	c__Actinomycetia	o__Actinomycetales	f__Actinomycetaceae	g__Pauljensenia	s__Pauljensenia sp916719935		6959	257	79.21	1.94	gtdb
GCF_900200035.1	d__Bacteria	p__Pseudomonadota	c__Gammaproteobacteria	o__Enterobacterales	f__Enterobacteriaceae	g__Klebsiella	s__Klebsiella grimontii		407664	54	100	1.08	gtdb
GCF_900130125.1	d__Bacteria	p__Bacteroidota	c__Bacteroidia	o__Bacteroidales	f__Bacteroidaceae	g__Bacteroides	s__Bacteroides congonensis		1662293	11	97.68	0.6	gtdb
GCA_900549455.1	d__Bacteria	p__Actinomycetota	c__Coriobacteriia	o__Coriobacteriales	f__Coriobacteriaceae	g__Collinsella	s__Collinsella sp900549455		14308	185	91.62	1.88	gtdb
GCF_014287875.1	d__Bacteria	p__Bacillota_A	c__Clostridia	o__Oscillospirales	f__Oscillospiraceae	g__Lawsonibacter	s__Lawsonibacter sp014287875		260387	42	99.33	0	gtdb
GCA_905203015.1	d__Bacteria	p__Bacillota_A	c__Clostridia	o__Christensenellales	f__Borkfalkiaceae	g__UBA7597	s__UBA7597 sp003448195		108131	27	95.97	0	gtdb
GCF_003352385.1	d__Bacteria	p__Pseudomonadota	c__Gammaproteobacteria	o__Enterobacterales_A	f__Pasteurellaceae	g__Haemophilus	s__Haemophilus haemolyticus_I		1973061	1	99.66	0	gtdb
GCF_012396505.1	d__Bacteria	p__Bacillota	c__Bacilli	o__Lactobacillales	f__Lactobacillaceae	g__Periweissella	s__Periweissella fabalis		134641	25	99.46	0.14	gtdb
GCF_001404695.1	d__Bacteria	p__Actinomycetota	c__Coriobacteriia	o__Coriobacteriales	f__Coriobacteriaceae	g__Collinsella	s__Collinsella aerofaciens_E		43584	93	99.19	0.81	gtdb
GCF_900155525.1	d__Bacteria	p__Desulfobacterota	c__Desulfovibrionia	o__Desulfovibrionales	f__Desulfovibrionaceae	g__Mailhella	s__Mailhella massiliensis		267679	32	98.7	2.37	gtdb
GCF_000173415.1	d__Bacteria	p__Pseudomonadota	c__Gammaproteobacteria	o__Enterobacterales	f__Enterobacteriaceae	g__Providencia	s__Providencia alcalifaciens		205321	79	99.46	0	gtdb
GCA_934565425.1	d__Bacteria	p__Bacillota_A	c__Clostridia	o__Oscillospirales	f__Oscillospiraceae	g__Onthomonas	s__Onthomonas sp934565425		18049	144	76.52	1.4	gtdb
GCA_900542555.1	d__Bacteria	p__Actinomycetota	c__Coriobacteriia	o__Coriobacteriales	f__Coriobacteriaceae	g__Collinsella	s__Collinsella sp900542555		32539	93	98.04	0.81	gtdb
GCF_011754535.1	d__Bacteria	p__Pseudomonadota	c__Gammaproteobacteria	o__Enterobacterales	f__Enterobacteriaceae	g__Enterobacter	s__Enterobacter cloacae_N		4850333	2	99.67	0.33	gtdb
GCA_905214605.1	d__Bacteria	p__Bacillota_A	c__Clostridia	o__Oscillospirales	f__Oscillospiraceae	g__HGM13010	s__HGM13010 sp905214605		6253	273	73.64	3.24	gtdb
GCA_934725575.1	d__Bacteria	p__Bacteroidota	c__Bacteroidia	o__Bacteroidales	f__UBA932	g__Cryptobacteroides	s__Cryptobacteroides sp934725575		117849	42	93.65	2.22	gtdb
GCA_900541745.1	d__Bacteria	p__Actinomycetota	c__Coriobacteriia	o__Coriobacteriales	f__Coriobacteriaceae	g__Collinsella	s__Collinsella sp900541745		107370	27	99.19	0.81	gtdb
GCF_900104605.1	d__Bacteria	p__Bacteroidota	c__Bacteroidia	o__Bacteroidales	f__Rikenellaceae	g__Tidjanibacter	s__Tidjanibacter inops		2097882	9	99.52	0	gtdb
GCF_004211955.1	d__Bacteria	p__Pseudomonadota	c__Gammaproteobacteria	o__Enterobacterales	f__Enterobacteriaceae	g__Escherichia	s__Escherichia sp004211955		213202	64	98.96	0.44	gtdb
GCA_905197585.1	d__Bacteria	p__Actinomycetota	c__Coriobacteriia	o__Coriobacteriales	f__Coriobacteriaceae	g__Collinsella	s__Collinsella sp905197585		8699	333	96.91	0.81	gtdb
GCF_000738005.1	d__Bacteria	p__Actinomycetota	c__Actinomycetia	o__Actinomycetales	f__Bifidobacteriaceae	g__Bifidobacterium	s__Bifidobacterium crudilactis		1716957	6	99.14	1.93	gtdb
GCA_900552335.1	d__Bacteria	p__Bacillota	c__Bacilli	o__RF39	f__UBA660	g__UMGS1498	s__UMGS1498 sp900552335		56217	23	73.6	0	gtdb
GCA_905214155.1	d__Bacteria	p__Bacillota_A	c__Clostridia	o__Oscillospirales	f__Oscillospiraceae	g__CAG-170	s__CAG-170 sp905214155		11467	190	79.5	0.67	gtdb
GCA_900547345.1	d__Bacteria	p__Actinomycetota	c__Coriobacteriia	o__Coriobacteriales	f__Coriobacteriaceae	g__Collinsella	s__Collinsella sp900547345		17407	162	97.02	2.02	gtdb
GCF_900120195.1	d__Bacteria	p__Bacillota_A	c__Clostridia	o__Lachnospirales	f__Lachnospiraceae	g__Blautia_A	s__Blautia_A sp900120195		605906	8	99.37	1.58	gtdb
GCA_902373545.1	d__Bacteria	p__Actinomycetota	c__Actinomycetia	o__Actinomycetales	f__Actinomycetaceae	g__Pauljensenia	s__Pauljensenia sp902373545		21562	190	91.96	2.21	gtdb
GCA_900540095.1	d__Bacteria	p__Actinomycetota	c__Coriobacteriia	o__Coriobacteriales	f__Coriobacteriaceae	g__Collinsella	s__Collinsella sp900540095		21150	134	97.04	0	gtdb
GCA_000433455.1	d__Bacteria	p__Bacillota	c__Bacilli	o__RF39	f__UBA660	g__CAG-877	s__CAG-877 sp000433455		48421	61	94.66	5.62	gtdb
GCA_900541715.1	d__Bacteria	p__Actinomycetota	c__Coriobacteriia	o__Coriobacteriales	f__Coriobacteriaceae	g__Collinsella	s__Collinsella sp900541715		47893	67	99.19	0.81	gtdb
GCF_004154955.1	d__Bacteria	p__Bacillota_A	c__Clostridia	o__Oscillospirales	f__Oscillospiraceae	g__Intestinimonas	s__Intestinimonas butyriciproducens		3224506	1	98.66	0	gtdb
GCA_934663775.1	d__Bacteria	p__Actinomycetota	c__Coriobacteriia	o__Coriobacteriales	f__Eggerthellaceae	g__Ellagibacter	s__Ellagibacter sp934663775		89081	26	91.94	0.6	gtdb
GCA_900551435.1	d__Bacteria	p__Bacillota_A	c__Clostridia	o__Oscillospirales	f__Ruminococcaceae	g__Faecalibacterium	s__Faecalibacterium sp900551435		26808	125	88.85	2.49	gtdb
GCF_014297285.1	d__Bacteria	p__Bacillota_A	c__Clostridia	o__Oscillospirales	f__Oscillospiraceae	g__Dysosmobacter	s__Dysosmobacter sp001916835		161262	128	98.66	0	gtdb
GCA_900772705.1	d__Bacteria	p__Bacillota_A	c__Clostridia	o__Oscillospirales	f__Acutalibacteraceae	g__Eubacterium_R	s__Eubacterium_R sp900772705		8020	250	75.57	1.34	gtdb
GCF_014287585.1	d__Bacteria	p__Bacteroidota	c__Bacteroidia	o__Bacteroidales	f__Tannerellaceae	g__Parabacteroides	s__Parabacteroides sp014287585		101257	117	99.42	0.51	gtdb
GCA_900765115.1	d__Bacteria	p__Actinomycetota	c__Coriobacteriia	o__Coriobacteriales	f__Coriobacteriaceae	g__Collinsella	s__Collinsella sp900765115		30247	113	93.55	1.61	gtdb
GCA_900761615.1	d__Bacteria	p__Actinomycetota	c__Coriobacteriia	o__Coriobacteriales	f__Coriobacteriaceae	g__Collinsella	s__Collinsella sp900761615		13590	179	85.93	1.61	gtdb
GCA_900544115.1	d__Bacteria	p__Actinomycetota	c__Coriobacteriia	o__Coriobacteriales	f__Coriobacteriaceae	g__Collinsella	s__Collinsella sp900544115		73544	50	100	1.61	gtdb
GCA_934561555.1	d__Bacteria	p__Bacillota_A	c__Clostridia	o__Oscillospirales	f__Ruminococcaceae	g__Faecalibacterium	s__Faecalibacterium sp934561555		106057	70	98.3	0	gtdb
GCF_000215745.1	d__Bacteria	p__Pseudomonadota	c__Gammaproteobacteria	o__Enterobacterales	f__Enterobacteriaceae	g__Klebsiella	s__Klebsiella aerogenes		5280350	1	100	0.39	gtdb
GCF_003477525.1	d__Bacteria	p__Bacillota_A	c__Clostridia	o__Lachnospirales	f__Lachnospiraceae	g__Blautia_A	s__Blautia_A sp003477525		66465	168	98.73	0.13	gtdb
GCA_916988195.3	d__Bacteria	p__Bacillota_A	c__Clostridia	o__Oscillospirales	f__Oscillospiraceae	g__CAG-170	s__CAG-170 sp900549635		89982	81	94.63	1.48	gtdb
GCA_934747325.1	d__Bacteria	p__Cyanobacteriota	c__Vampirovibrionia	o__Gastranaerophilales	f__Gastranaerophilaceae	g__CAG-196	s__CAG-196 sp934747325		25634	111	85.03	0.43	gtdb
GCA_900554585.1	d__Bacteria	p__Actinomycetota	c__Coriobacteriia	o__Coriobacteriales	f__Coriobacteriaceae	g__Collinsella	s__Collinsella sp900554585		6206	296	75.67	1.97	gtdb
GCA_900542175.1	d__Bacteria	p__Actinomycetota	c__Coriobacteriia	o__Coriobacteriales	f__Coriobacteriaceae	g__Collinsella	s__Collinsella sp900542175		36051	87	98.39	0.81	gtdb
GCA_900766575.1	d__Bacteria	p__Bacillota_A	c__Clostridia	o__Lachnospirales	f__Lachnospiraceae	g__Acetatifactor	s__Acetatifactor sp900766575		22965	190	73.44	3.85	gtdb
GCA_900549655.1	d__Bacteria	p__Actinomycetota	c__Coriobacteriia	o__Coriobacteriales	f__Coriobacteriaceae	g__Collinsella	s__Collinsella sp900549655		15112	199	91.13	1.88	gtdb
GCA_900549845.1	d__Bacteria	p__Bacillota_C	c__Negativicutes	o__Veillonellales	f__Veillonellaceae	g__Veillonella	s__Veillonella sp900549845		10925	203	83.95	0.6	gtdb
GCF_020089495.1	d__Bacteria	p__Bacillota	c__Bacilli	o__Lactobacillales	f__Streptococcaceae	g__Streptococcus	s__Streptococcus sp020089495		65964	126	99.42	0.2	gtdb
GCF_024462815.1	d__Bacteria	p__Bacillota_A	c__Clostridia	o__Oscillospirales	f__Ruminococcaceae	g__Gemmiger	s__Gemmiger sp900554145		152467	127	98.64	0.34	gtdb
GCA_934202095.1	d__Bacteria	p__Bacillota_C	c__Negativicutes	o__Veillonellales	f__Veillonellaceae	g__Veillonella	s__Veillonella sp934202095		38179	63	61.55	0.86	gtdb
GCA_900767495.1	d__Bacteria	p__Bacillota_A	c__Clostridia	o__Christensenellales	f__Borkfalkiaceae	g__UBA10281	s__UBA10281 sp900767495		15682	140	71.98	0.81	gtdb
GCA_003522945.1	d__Bacteria	p__Bacillota_A	c__Clostridia	o__Oscillospirales	f__Oscillospiraceae	g__UBA738	s__UBA738 sp003522945		7505	511	66.37	2.01	gtdb
GCA_905214825.1	d__Bacteria	p__Bacillota_A	c__Clostridia	o__Lachnospirales	f__Anaerotignaceae	g__Anaerotignum	s__Anaerotignum sp905214825		13475	223	95.41	0.67	gtdb
GCF_000513195.1	d__Bacteria	p__Bacteroidota	c__Bacteroidia	o__Bacteroidales	f__Bacteroidaceae	g__Bacteroides	s__Bacteroides timonensis		66759	211	98.88	0.87	gtdb
GCF_000527275.1	d__Bacteria	p__Pseudomonadota	c__Gammaproteobacteria	o__Enterobacterales	f__Enterobacteriaceae	g__Providencia	s__Providencia alcalifaciens_A		327754	28	100	0	gtdb
GCF_019243775.1	d__Bacteria	p__Pseudomonadota	c__Gammaproteobacteria	o__Enterobacterales	f__Enterobacteriaceae	g__Morganella	s__Morganella morganii		3814728	1	100	0	gtdb
GCA_905215445.1	d__Bacteria	p__Actinomycetota	c__Coriobacteriia	o__Coriobacteriales	f__Coriobacteriaceae	g__Collinsella	s__Collinsella sp905215445		34292	88	99.19	0.81	gtdb
GCA_900555425.1	d__Bacteria	p__Patescibacteria	c__Saccharimonadia	o__Saccharimonadales	f__Nanosynbacteraceae	g__Nanosynbacter	s__Nanosynbacter sp900555425		13630	60	61.51	0	gtdb
GCA_900542275.1	d__Bacteria	p__Actinomycetota	c__Coriobacteriia	o__Coriobacteriales	f__Coriobacteriaceae	g__Collinsella	s__Collinsella sp900542275		32358	73	98.39	0.81	gtdb
GCF_003438495.1	d__Bacteria	p__Actinomycetota	c__Coriobacteriia	o__Coriobacteriales	f__Coriobacteriaceae	g__Collinsella	s__Collinsella sp003438495		45971	110	100	0.81	gtdb
GCA_900541785.1	d__Bacteria	p__Actinomycetota	c__Coriobacteriia	o__Coriobacteriales	f__Coriobacteriaceae	g__Collinsella	s__Collinsella sp900541785		40181	78	99.19	0.81	gtdb
GCF_014384985.1	d__Bacteria	p__Bacillota_A	c__Clostridia	o__Lachnospirales	f__Lachnospiraceae	g__Butyribacter	s__Butyribacter huaianensis		158024	56	98.66	0	gtdb
GCF_002549775.1	d__Bacteria	p__Bacillota_A	c__Clostridia	o__Oscillospirales	f__Ruminococcaceae	g__Faecalibacterium	s__Faecalibacterium prausnitzii_F		181717	79	99.32	1.95	gtdb
GCA_900544305.1	d__Bacteria	p__Bacteroidota	c__Bacteroidia	o__Bacteroidales	f__Muribaculaceae	g__Limisoma	s__Limisoma sp900544305		59426	79	96.23	0.88	gtdb
GCA_900543875.1	d__Bacteria	p__Actinomycetota	c__Coriobacteriia	o__Coriobacteriales	f__Atopobiaceae	g__Parolsenella	s__Parolsenella sp900543875		26426	103	93.04	0.12	gtdb
GCA_001752465.1	d__Bacteria	p__Pseudomonadota	c__Gammaproteobacteria	o__Enterobacterales_A	f__Pasteurellaceae	g__Haemophilus	s__Haemophilus quentini		69953	59	99.66	0	gtdb
GCA_900772675.1	d__Bacteria	p__Bacillota_A	c__Clostridia	o__Lachnospirales	f__Lachnospiraceae	g__Fusicatenibacter	s__Fusicatenibacter sp900772675		6837	324	63.11	1.27	gtdb
GCA_018376905.1	d__Bacteria	p__Actinomycetota	c__Coriobacteriia	o__Coriobacteriales	f__Coriobacteriaceae	g__Collinsella	s__Collinsella sp018376905		51344	77	100	0.81	gtdb
GCA_905200945.1	d__Bacteria	p__Verrucomicrobiota	c__Verrucomicrobiae	o__Verrucomicrobiales	f__Akkermansiaceae	g__Akkermansia	s__Akkermansia sp905200945		105610	46	97.96	0.04	gtdb
GCF_013304735.1	d__Bacteria	p__Bacillota_A	c__Clostridia	o__Lachnospirales	f__Lachnospiraceae	g__Blautia_A	s__Blautia_A sp900066205		101889	123	99.37	0.32	gtdb
GCF_003480435.1	d__Bacteria	p__Bacillota_A	c__Clostridia	o__Lachnospirales	f__Lachnospiraceae	g__Copromonas	s__Copromonas sp900066055		133299	129	100	0	gtdb
GCA_900758475.1	d__Bacteria	p__Actinomycetota	c__Coriobacteriia	o__Coriobacteriales	f__Coriobacteriaceae	g__Collinsella	s__Collinsella sp900758475		94378	41	91.13	0.81	gtdb
GCA_910589175.1	d__Bacteria	p__Bacillota	c__Bacilli	o__Lactobacillales	f__Lactobacillaceae	g__Lactobacillus	s__Lactobacillus sp910589175		60364	47	98.45	0.06	gtdb
GCA_905215645.1	d__Bacteria	p__Bacillota_C	c__Negativicutes	o__Acidaminococcales	f__Acidaminococcaceae	g__Acidaminococcus	s__Acidaminococcus sp905215645		55844	84	100	0.6	gtdb
GCA_900541795.1	d__Bacteria	p__Actinomycetota	c__Coriobacteriia	o__Coriobacteriales	f__Coriobacteriaceae	g__Collinsella	s__Collinsella sp900541795		98704	40	99.19	0.81	gtdb
GCA_902363395.1	d__Bacteria	p__Bacillota	c__Bacilli	o__Lactobacillales	f__Streptococcaceae	g__Streptococcus	s__Streptococcus sp902363395		1529949	8	99.66	0.17	gtdb
GCA_025149465.1	d__Bacteria	p__Bacillota	c__Bacilli	o__Erysipelotrichales	f__Coprobacillaceae	g__Thomasclavelia	s__Thomasclavelia spiroformis		2528470	1	100	0	gtdb
GCA_019414045.1	d__Bacteria	p__Actinomycetota	c__Coriobacteriia	o__Coriobacteriales	f__Coriobacteriaceae	g__Collinsella	s__Collinsella sp019414045		106965	40	100	0.81	gtdb
GCF_009876115.1	d__Bacteria	p__Actinomycetota	c__Coriobacteriia	o__Coriobacteriales	f__Coriobacteriaceae	g__Collinsella	s__Collinsella aerofaciens_N		130850	35	100	0.81	gtdb
GCF_011045835.1	d__Bacteria	p__Pseudomonadota	c__Gammaproteobacteria	o__Enterobacterales	f__Enterobacteriaceae	g__Proteus	s__Proteus cibarius		3944857	3	100	0.54	gtdb
GCA_900550035.1	d__Bacteria	p__Bacteroidota	c__Bacteroidia	o__Bacteroidales	f__Bacteroidaceae	g__Prevotella	s__Prevotella sp900550035		45787	109	96.22	3.15	gtdb
GCA_900553645.1	d__Bacteria	p__Bacillota_A	c__Clostridia	o__Christensenellales	f__CAG-74	g__Fimadaptatus	s__Fimadaptatus sp900553645		5799	371	77.35	1.51	gtdb
GCA_900549715.1	d__Bacteria	p__Actinomycetota	c__Coriobacteriia	o__Coriobacteriales	f__Coriobacteriaceae	g__Collinsella	s__Collinsella sp900549715		122711	21	85.48	0.81	gtdb
GCA_019117005.1	d__Bacteria	p__Actinomycetota	c__Coriobacteriia	o__Coriobacteriales	f__Coriobacteriaceae	g__Collinsella	s__Collinsella stercoripullorum		62049	59	98.07	0.27	gtdb
GCA_000432175.1	d__Bacteria	p__Bacillota_A	c__Clostridia	o__Oscillospirales	f__Ruminococcaceae	g__CAG-115	s__CAG-115 sp000432175		10943	368	92.87	0.67	gtdb
GCF_019402445.1	d__Bacteria	p__Spirochaetota	c__Brachyspirae	o__Brachyspirales	f__Brachyspiraceae	g__Brachyspira	s__Brachyspira pilosicoli_B		8702	463	96	0.8	gtdb
GCF_001311175.1	d__Bacteria	p__Bacillota	c__Bacilli	o__Lactobacillales	f__Lactobacillaceae	g__Lacticaseibacillus	s__Lacticaseibacillus pantheris		58613	81	92.84	1.75	gtdb
GCA_916438195.1	d__Bacteria	p__Bacteroidota	c__Bacteroidia	o__Bacteroidales	f__Bacteroidaceae	g__Alloprevotella	s__Alloprevotella sp916438195		1948787	1	76.11	0	gtdb
GCA_900553595.1	d__Bacteria	p__Bacteroidota	c__Bacteroidia	o__Bacteroidales	f__Bacteroidaceae	g__Prevotella	s__Prevotella sp900553595		45055	67	75.85	1.25	gtdb
GCA_025151045.1	d__Bacteria	p__Bacteroidota	c__Bacteroidia	o__Bacteroidales	f__Tannerellaceae	g__Parabacteroides	s__Parabacteroides johnsonii		4749455	1	99.62	0	gtdb
GCA_900554485.1	d__Bacteria	p__Bacillota_A	c__Clostridia	o__Christensenellales	f__Borkfalkiaceae	g__UBA10281	s__UBA10281 sp900554485		12513	133	65.87	0	gtdb
GCA_016775335.1	d__Bacteria	p__Bacillota_A	c__Clostridia	o__Peptostreptococcales	f__Anaerovoracaceae	g__VUNA01	s__VUNA01 sp016775335		67172	68	97.16	0	gtdb
GCA_934667815.1	d__Bacteria	p__Bacillota_A	c__Clostridia	o__Oscillospirales	f__Oscillospiraceae	g__Faecousia	s__Faecousia sp934667815		66882	65	92.41	0.67	gtdb
GCA_900541065.1	d__Bacteria	p__Actinomycetota	c__Coriobacteriia	o__Coriobacteriales	f__Coriobacteriaceae	g__Collinsella	s__Collinsella sp900541065		88437	36	100	0.81	gtdb
GCF_000614185.1	d__Bacteria	p__Bacteroidota	c__Bacteroidia	o__Bacteroidales	f__Bacteroidaceae	g__Phocaeicola	s__Phocaeicola sartorii		114529	160	97.76	0.19	gtdb
GCF_001544095.1	d__Bacteria	p__Bacillota	c__Bacilli	o__Lactobacillales	f__Enterococcaceae	g__Enterococcus_D	s__Enterococcus_D casseliflavus		158832	54	99.25	0.38	gtdb
GCA_900544465.1	d__Bacteria	p__Actinomycetota	c__Coriobacteriia	o__Coriobacteriales	f__Coriobacteriaceae	g__Collinsella	s__Collinsella sp900544465		11088	220	91.59	0	gtdb
GCA_900759565.1	d__Bacteria	p__Actinomycetota	c__Coriobacteriia	o__Coriobacteriales	f__Coriobacteriaceae	g__Collinsella	s__Collinsella sp900759565		54762	65	95.97	1.08	gtdb
GCA_900542375.1	d__Bacteria	p__Bacillota_A	c__Clostridia	o__Oscillospirales	f__Acutalibacteraceae	g__UMGS1071	s__UMGS1071 sp900542375		24017	134	94.3	0	gtdb
GCA_934193545.1	d__Bacteria	p__Bacillota	c__Bacilli	o__Lactobacillales	f__Aerococcaceae	g__Granulicatella	s__Granulicatella sp934193545		37271	86	91.53	0.96	gtdb
GCA_900548765.1	d__Bacteria	p__Bacillota_A	c__Clostridia	o__Lachnospirales	f__Lachnospiraceae	g__Agathobacter	s__Agathobacter sp900548765		10805	276	88.71	0.97	gtdb
GCA_002847985.1	d__Bacteria	p__Pseudomonadota	c__Gammaproteobacteria	o__Burkholderiales	f__Neisseriaceae	g__Neisseria	s__Neisseria perflava_A		223636	28	100	0.23	gtdb
GCA_900552445.1	d__Bacteria	p__Bacillota_C	c__Negativicutes	o__Veillonellales	f__Veillonellaceae	g__Veillonella	s__Veillonella sp900552445		6030	257	77.55	0.85	gtdb
GCA_900557435.1	d__Bacteria	p__Bacillota_A	c__Clostridia	o__Lachnospirales	f__Lachnospiraceae	g__Coprococcus	s__Coprococcus sp900557435		8149	398	70.72	3.69	gtdb
GCA_900550205.1	d__Bacteria	p__Actinomycetota	c__Coriobacteriia	o__Coriobacteriales	f__Coriobacteriaceae	g__Collinsella	s__Collinsella sp900550205		13302	207	89.72	2.02	gtdb
GCA_934668875.1	d__Bacteria	p__Actinomycetota	c__Coriobacteriia	o__Coriobacteriales	f__Coriobacteriaceae	g__Collinsella	s__Collinsella sp934668875		182453	18	97.58	0.81	gtdb
GCA_015255025.1	d__Bacteria	p__Pseudomonadota	c__Gammaproteobacteria	o__Enterobacterales_A	f__Pasteurellaceae	g__Haemophilus_D	s__Haemophilus_D sp015255025		13550	229	88.11	0.7	gtdb
GCA_900755085.1	d__Bacteria	p__Bacillota	c__Bacilli	o__Lactobacillales	f__Streptococcaceae	g__Streptococcus	s__Streptococcus sp900755085		15857	184	84.76	2.99	gtdb
GCF_000686605.1	d__Bacteria	p__Bacillota	c__Bacilli	o__Lactobacillales	f__Streptococcaceae	g__Streptococcus	s__Streptococcus sobrinus		65581	55	98.88	0	gtdb
GCA_900550345.1	d__Bacteria	p__Bacillota_A	c__Clostridia	o__Tissierellales	f__Peptoniphilaceae	g__Anaerococcus	s__Anaerococcus sp900550345		9821	195	85.48	1.22	gtdb
GCF_002015045.1	d__Bacteria	p__Pseudomonadota	c__Gammaproteobacteria	o__Enterobacterales_A	f__Pasteurellaceae	g__Haemophilus_A	s__Haemophilus_A paraphrohaemolyticus		181695	33	99.43	0.34	gtdb
GCA_000432155.1	d__Bacteria	p__Bacillota_A	c__Clostridia	o__Lachnospirales	f__CAG-274	g__CAG-274	s__CAG-274 sp000432155		67262	112	98.66	0.67	gtdb
GCF_000577815.1	d__Bacteria	p__Bacillota_A	c__Clostridia	o__Clostridiales	f__Clostridiaceae	g__Clostridium	s__Clostridium saudiense		89852	100	99.19	1.77	gtdb
GCA_902363125.1	d__Bacteria	p__Actinomycetota	c__Coriobacteriia	o__Coriobacteriales	f__Coriobacteriaceae	g__Collinsella	s__Collinsella sp902363125		178732	41	100	0.81	gtdb
GCF_005121165.3	d__Bacteria	p__Bacillota_A	c__Clostridia	o__Oscillospirales	f__Oscillospiraceae	g__Dysosmobacter	s__Dysosmobacter welbionis		3576111	1	97.32	0	gtdb
GCA_934316545.1	d__Bacteria	p__Bacillota_A	c__Clostridia	o__Lachnospirales	f__Lachnospiraceae	g__Agathobacter	s__Agathobacter sp934316545		55125	45	66.15	0.48	gtdb
GCA_019410105.1	d__Bacteria	p__Bacillota_A	c__Clostridia	o__Oscillospirales	f__Oscillospiraceae	g__DXTB01	s__DXTB01 sp019410105		40919	81	54.07	0.22	gtdb
GCA_900549055.1	d__Bacteria	p__Bacillota_A	c__Clostridia	o__Oscillospirales	f__Acutalibacteraceae	g__UBA737	s__UBA737 sp900549055		18582	152	90.38	1.45	gtdb
GCA_905215095.1	d__Bacteria	p__Actinomycetota	c__Coriobacteriia	o__Coriobacteriales	f__Coriobacteriaceae	g__Collinsella	s__Collinsella sp905215095		6491	376	86.07	3.36	gtdb
GCF_001984825.2	d__Bacteria	p__Pseudomonadota	c__Gammaproteobacteria	o__Enterobacterales	f__Enterobacteriaceae	g__Enterobacter	s__Enterobacter chengduensis		5111427	2	99.37	0.51	gtdb
GCA_000432835.1	d__Bacteria	p__Bacillota	c__Bacilli	o__RF39	f__UBA660	g__CAG-417	s__CAG-417 sp000432835		202753	31	93.26	1.28	gtdb
GCA_900757465.1	d__Bacteria	p__Actinomycetota	c__Coriobacteriia	o__Coriobacteriales	f__Coriobacteriaceae	g__Collinsella	s__Collinsella sp900757465		19464	148	90.32	1.08	gtdb
GCF_008080435.1	d__Bacteria	p__Pseudomonadota	c__Gammaproteobacteria	o__Enterobacterales	f__Enterobacteriaceae	g__Enterobacter	s__Enterobacter asburiae_C		419394	67	99.07	1.13	gtdb
GCF_000210895.1	d__Bacteria	p__Pseudomonadota	c__Gammaproteobacteria	o__Enterobacterales_A	f__Pasteurellaceae	g__Haemophilus_D	s__Haemophilus_D parainfluenzae_A		2086875	1	99.89	0	gtdb
GCA_905215855.1	d__Bacteria	p__Bacillota_A	c__Clostridia	o__Oscillospirales	f__Acutalibacteraceae	g__Ruminococcus_E	s__Ruminococcus_E sp905215855		37552	89	98.55	0.59	gtdb
GCA_934122085.1	d__Bacteria	p__Bacillota_A	c__Clostridia	o__TANB77	f__CAG-508	g__CAG-269	s__CAG-269 sp934122085		148306	28	74.21	2.13	gtdb
GCA_022775985.1	d__Bacteria	p__Bacteroidota	c__Bacteroidia	o__Bacteroidales	f__Bacteroidaceae	g__Prevotella	s__Prevotella sp022775985		27153	157	96.74	3.01	gtdb
GCF_009767585.1	d__Bacteria	p__Bacillota	c__Bacilli	o__Erysipelotrichales	f__Coprobacillaceae	g__Coprobacillus	s__Coprobacillus cateniformis		1043421	32	100	0	gtdb
GCA_905221355.1	d__Bacteria	p__Bacillota	c__Bacilli	o__Lactobacillales	f__Streptococcaceae	g__Streptococcus	s__Streptococcus sp905221355		621091	66	99.57	0.6	gtdb
GCF_003096415.1	d__Bacteria	p__Verrucomicrobiota	c__Lentisphaeria	o__Victivallales	f__Victivallaceae	g__Victivallis	s__Victivallis vadensis		126504	90	93.92	2.7	gtdb
GCF_020526085.1	d__Bacteria	p__Pseudomonadota	c__Gammaproteobacteria	o__Enterobacterales	f__Enterobacteriaceae	g__Klebsiella	s__Klebsiella africana		5243981	2	99.82	0.48	gtdb
GCA_002404795.1	d__Bacteria	p__Bacillota_A	c__Clostridia	o__Oscillospirales	f__Oscillospiraceae	g__CAG-170	s__CAG-170 sp002404795		9689	386	80.69	3.1	gtdb
GCA_934597165.1	d__Bacteria	p__Bacillota_A	c__Clostridia	o__Oscillospirales	f__Oscillospiraceae	g__Onthomonas	s__Onthomonas sp934597165		40277	97	90.27	0	gtdb
GCA_905215385.1	d__Bacteria	p__Actinomycetota	c__Coriobacteriia	o__Coriobacteriales	f__Coriobacteriaceae	g__Collinsella	s__Collinsella sp905215385		83478	43	100	1.88	gtdb
GCF_000759775.1	d__Bacteria	p__Pseudomonadota	c__Gammaproteobacteria	o__Enterobacterales	f__Enterobacteriaceae	g__Escherichia	s__Escherichia albertii		29757	235	98.15	0.19	gtdb
GCF_003459505.1	d__Bacteria	p__Actinomycetota	c__Coriobacteriia	o__Coriobacteriales	f__Coriobacteriaceae	g__Collinsella	s__Collinsella sp003459505		108838	69	100	1.61	gtdb
GCA_916049935.1	d__Bacteria	p__Bacillota	c__Bacilli	o__Lactobacillales	f__Aerococcaceae	g__Granulicatella	s__Granulicatella sp916049935		5370	224	66.43	0.68	gtdb
GCA_001618085.1	d__Bacteria	p__Pseudomonadota	c__Gammaproteobacteria	o__Burkholderiales	f__Neisseriaceae	g__Neisseria	s__Neisseria flavescens_C		131736	67	99.7	0.56	gtdb
GCF_015670745.1	d__Bacteria	p__Actinomycetota	c__Coriobacteriia	o__Coriobacteriales	f__Coriobacteriaceae	g__Collinsella	s__Collinsella aerofaciens_T		76867	48	100	0.81	gtdb
GCA_934617065.1	d__Bacteria	p__Actinomycetota	c__Coriobacteriia	o__Coriobacteriales	f__Eggerthellaceae	g__Anaerotardibacter	s__Anaerotardibacter sp934617065		195802	10	60.48	0	gtdb
GCA_003150615.1	d__Bacteria	p__Bacteroidota	c__Bacteroidia	o__Flavobacteriales	f__UBA1820	g__Merdimorpha	s__Merdimorpha sp003150615		164351	15	88.24	3.68	gtdb
GCA_900542325.1	d__Bacteria	p__Actinomycetota	c__Coriobacteriia	o__Coriobacteriales	f__Coriobacteriaceae	g__Collinsella	s__Collinsella sp900542325		58109	62	98.39	0.81	gtdb
GCA_934630855.1	d__Bacteria	p__Actinomycetota	c__Coriobacteriia	o__Coriobacteriales	f__Coriobacteriaceae	g__Collinsella	s__Collinsella sp934630855		40859	79	83.87	0.81	gtdb
GCA_900550295.1	d__Bacteria	p__Cyanobacteriota	c__Vampirovibrionia	o__Gastranaerophilales	f__Gastranaerophilaceae	g__UBA6984	s__UBA6984 sp900550295		19448	122	83.76	0.85	gtdb
GCA_934149155.1	d__Bacteria	p__Bacillota_A	c__Clostridia	o__TANB77	f__CAG-508	g__CAG-269	s__CAG-269 sp934149155		23621	87	73.82	0.88	gtdb
GCA_019423025.1	d__Bacteria	p__Pseudomonadota	c__Gammaproteobacteria	o__Enterobacterales_A	f__Pasteurellaceae	g__Haemophilus_D	s__Haemophilus_D sp019423025		135194	23	99.55	0.21	gtdb
GCA_900545835.1	d__Bacteria	p__Actinomycetota	c__Coriobacteriia	o__Coriobacteriales	f__Coriobacteriaceae	g__Collinsella	s__Collinsella sp900545835		16483	177	98.39	1.73	gtdb
GCF_900155425.1	d__Bacteria	p__Bacteroidota	c__Bacteroidia	o__Bacteroidales	f__Tannerellaceae	g__Parabacteroides	s__Parabacteroides massiliensis		762401	27	99.42	0.58	gtdb
GCA_905221035.1	d__Bacteria	p__Bacillota	c__Bacilli	o__Lactobacillales	f__Streptococcaceae	g__Streptococcus	s__Streptococcus sp905221035		168268	67	99.42	0.25	gtdb
GCA_934140355.1	d__Bacteria	p__Bacillota	c__Bacilli	o__RF39	f__UBA660	g__RUG11198	s__RUG11198 sp934140355		29261	96	82.66	4.25	gtdb
GCA_900548215.1	d__Bacteria	p__Bacillota_A	c__Clostridia	o__Lachnospirales	f__Lachnospiraceae	g__Coprococcus	s__Coprococcus sp900548215		26673	150	90.93	1.17	gtdb
GCA_934373375.1	d__Bacteria	p__Bacillota_A	c__Clostridia	o__Lachnospirales	f__Lachnospiraceae	g__Merdisoma	s__Merdisoma sp934373375		7129	451	91.92	1.96	gtdb
GCF_000220085.1	d__Bacteria	p__Bacillota	c__Bacilli	o__Lactobacillales	f__Streptococcaceae	g__Streptococcus	s__Streptococcus mitis_K		117863	34	99.82	0.2	gtdb
GCF_003144325.1	d__Bacteria	p__Pseudomonadota	c__Gammaproteobacteria	o__Enterobacterales	f__Enterobacteriaceae	g__Proteus	s__Proteus terrae		242535	38	100	0	gtdb
GCA_900550865.1	d__Bacteria	p__Bacillota_A	c__Clostridia	o__Lachnospirales	f__Lachnospiraceae	g__Dorea_A	s__Dorea_A sp900550865		78205	48	88.07	1.95	gtdb
GCA_900542395.1	d__Bacteria	p__Bacillota_A	c__Clostridia	o__Christensenellales	f__CAG-74	g__Ventricola	s__Ventricola sp900542395		30194	130	95.56	0.27	gtdb
GCF_015553625.1	d__Bacteria	p__Bacillota	c__Bacilli	o__Lactobacillales	f__Streptococcaceae	g__Streptococcus	s__Streptococcus australis_B		138550	22	100	0	gtdb
GCF_003493605.1	d__Bacteria	p__Pseudomonadota	c__Gammaproteobacteria	o__Enterobacterales_A	f__Pasteurellaceae	g__Haemophilus	s__Haemophilus haemolyticus_J		133834	29	99.66	0	gtdb
GCA_900768185.1	d__Bacteria	p__Pseudomonadota	c__Alphaproteobacteria	o__RF32	f__CAG-977	g__UBA11549	s__UBA11549 sp900768185		145197	45	76.08	0.05	gtdb
GCA_024205705.1	d__Bacteria	p__Pseudomonadota	c__Gammaproteobacteria	o__Burkholderiales	f__Neisseriaceae	g__Neisseria	s__Neisseria subflava_D		2479061	1	99.7	1.07	gtdb
GCF_900101445.1	d__Bacteria	p__Bacillota	c__Bacilli	o__Lactobacillales	f__Streptococcaceae	g__Streptococcus	s__Streptococcus equinus_B		1308859	8	100	0	gtdb
GCA_905207425.1	d__Bacteria	p__Actinomycetota	c__Coriobacteriia	o__Coriobacteriales	f__Coriobacteriaceae	g__Collinsella	s__Collinsella sp905207425		13042	215	90.43	2.53	gtdb
GCA_934747485.1	d__Bacteria	p__Spirochaetota	c__Brachyspirae	o__Brachyspirales	f__Brachyspiraceae	g__Brachyspira	s__Brachyspira sp934747485		33606	134	98.4	0	gtdb
GCA_022720335.1	d__Bacteria	p__Actinomycetota	c__Coriobacteriia	o__Coriobacteriales	f__Coriobacteriaceae	g__Collinsella	s__Collinsella sp022720335		10814	473	99.33	8.74	gtdb
GCA_900550685.1	d__Bacteria	p__Bacillota_A	c__Clostridia	o__Oscillospirales	f__Oscillospiraceae	g__Dysosmobacter	s__Dysosmobacter sp900550685		13841	197	85.55	1.4	gtdb
GCA_905198475.1	d__Bacteria	p__Pseudomonadota	c__Gammaproteobacteria	o__Burkholderiales	f__Burkholderiaceae_A	g__Sutterella	s__Sutterella sp905198475		30665	135	99.28	0.12	gtdb
GCF_014287435.1	d__Bacteria	p__Bacillota_A	c__Clostridia	o__Lachnospirales	f__Lachnospiraceae	g__Pararoseburia	s__Pararoseburia lenta		738110	10	98.43	0.97	gtdb
GCA_900550825.1	d__Bacteria	p__Actinomycetota	c__Coriobacteriia	o__Coriobacteriales	f__Coriobacteriaceae	g__Collinsella	s__Collinsella sp900550825		10695	239	94.35	3.23	gtdb
GCA_900754255.1	d__Bacteria	p__Pseudomonadota	c__Gammaproteobacteria	o__Enterobacterales_A	f__Succinivibrionaceae	g__Succinivibrio	s__Succinivibrio sp900555115		24175	131	94.71	1.18	gtdb
GCA_001916775.1	d__Bacteria	p__Bacillota	c__Bacilli	o__RF39	f__UBA660	g__CAG-302	s__CAG-302 sp001916775		69979	43	92.42	2.25	gtdb
GCF_000180035.1	d__Bacteria	p__Bacillota	c__Bacilli	o__Lactobacillales	f__Streptococcaceae	g__Streptococcus	s__Streptococcus parasanguinis_C		202095	16	99.25	0	gtdb
GCA_900556675.1	d__Bacteria	p__Actinomycetota	c__Coriobacteriia	o__Coriobacteriales	f__Coriobacteriaceae	g__Collinsella	s__Collinsella sp900556675		6018	288	55.75	0	gtdb
GCF_014144855.1	d__Bacteria	p__Actinomycetota	c__Actinomycetia	o__Mycobacteriales	f__Mycobacteriaceae	g__Dietzia	s__Dietzia maris		7880	563	86.96	0	gtdb
GCA_900768435.1	d__Bacteria	p__Actinomycetota	c__Coriobacteriia	o__Coriobacteriales	f__Coriobacteriaceae	g__Collinsella	s__Collinsella sp900768435		100166	30	99.19	0.81	gtdb
GCA_900552705.1	d__Bacteria	p__Actinomycetota	c__Coriobacteriia	o__Coriobacteriales	f__Coriobacteriaceae	g__Collinsella	s__Collinsella sp900552705		12905	218	90.86	3.76	gtdb
GCA_900543945.1	d__Bacteria	p__Actinomycetota	c__Coriobacteriia	o__Coriobacteriales	f__Coriobacteriaceae	g__Collinsella	s__Collinsella sp900543945		18034	165	96.77	0.89	gtdb
GCA_003435055.1	d__Bacteria	p__Bacillota_A	c__Clostridia	o__Lachnospirales	f__Lachnospiraceae	g__Marvinbryantia	s__Marvinbryantia sp900066075		80008	98	97.45	0.63	gtdb
GCF_018709685.1	d__Bacteria	p__Verrucomicrobiota	c__Verrucomicrobiae	o__Verrucomicrobiales	f__Akkermansiaceae	g__Akkermansia	s__Akkermansia muciniphila_E		187750	48	95.24	0	gtdb
GCF_003475325.1	d__Bacteria	p__Actinomycetota	c__Coriobacteriia	o__Coriobacteriales	f__Coriobacteriaceae	g__Collinsella	s__Collinsella sp003475325		94073	62	100	0.81	gtdb
GCF_900324475.1	d__Bacteria	p__Pseudomonadota	c__Gammaproteobacteria	o__Enterobacterales	f__Enterobacteriaceae	g__Enterobacter	s__Enterobacter bugandensis		4717613	1	99.89	0.17	gtdb
GCA_934096105.1	d__Bacteria	p__Bacillota	c__Bacilli	o__RF39	f__UBA660	g__CAG-302	s__CAG-302 sp934096105		58042	47	90.17	1.12	gtdb
GCF_900106845.1	d__Bacteria	p__Bacillota_A	c__Clostridia	o__Peptostreptococcales	f__Peptostreptococcaceae	g__Romboutsia	s__Romboutsia timonensis		105346	61	98.94	0	gtdb
GCA_902388345.1	d__Bacteria	p__Actinomycetota	c__Coriobacteriia	o__Coriobacteriales	f__Coriobacteriaceae	g__Collinsella	s__Collinsella sp902388345		26310	134	99.19	1.16	gtdb
GCF_003464595.1	d__Bacteria	p__Bacteroidota	c__Bacteroidia	o__Bacteroidales	f__Bacteroidaceae	g__Bacteroides	s__Bacteroides intestinalis_A		238088	101	99.13	1.31	gtdb
GCA_900555635.1	d__Bacteria	p__Bacteroidota	c__Bacteroidia	o__Bacteroidales	f__Bacteroidaceae	g__Bacteroides	s__Bacteroides sp900555635		60990	189	69.31	1.72	gtdb
GCA_900549555.1	d__Bacteria	p__Actinomycetota	c__Coriobacteriia	o__Coriobacteriales	f__Coriobacteriaceae	g__Collinsella	s__Collinsella sp900549555		16955	187	95.43	2.69	gtdb
GCA_934613505.1	d__Bacteria	p__Bacillota_A	c__Clostridia	o__Oscillospirales	f__Oscillospiraceae	g__CAG-170	s__CAG-170 sp934613505		124556	21	58.15	0.67	gtdb
GCA_019113645.1	d__Bacteria	p__Bacillota_A	c__Clostridia	o__Lachnospirales	f__Lachnospiraceae	g__Mediterraneibacter	s__Mediterraneibacter vanvlietii		33171	144	94.72	4.39	gtdb
GCA_019114565.1	d__Bacteria	p__Desulfobacterota	c__Desulfovibrionia	o__Desulfovibrionales	f__Desulfovibrionaceae	g__Desulfovibrio	s__Desulfovibrio intestinigallinarum		12087	297	94.44	3.92	gtdb
GCA_900551295.1	d__Bacteria	p__Bacillota_A	c__Clostridia	o__Oscillospirales	f__CAG-382	g__UMGS1387	s__UMGS1387 sp900551295		92891	42	78.52	0.34	gtdb
GCA_900550175.1	d__Bacteria	p__Bacillota_C	c__Negativicutes	o__Veillonellales	f__Veillonellaceae	g__Veillonella	s__Veillonella sp900550175		12892	201	86.23	1.2	gtdb
GCA_900550635.1	d__Bacteria	p__Bacteroidota	c__Bacteroidia	o__Bacteroidales	f__Bacteroidaceae	g__UBA6398	s__UBA6398 sp900550635		17413	183	89.51	2.17	gtdb
GCF_002965065.1	d__Bacteria	p__Pseudomonadota	c__Gammaproteobacteria	o__Enterobacterales	f__Enterobacteriaceae	g__Escherichia	s__Escherichia sp002965065		42692	333	98.18	0.5	gtdb
GCA_900541485.1	d__Bacteria	p__Bacillota_C	c__Negativicutes	o__Veillonellales	f__Dialisteraceae	g__Dialister	s__Dialister sp900541485		129147	21	95.48	0	gtdb
GCF_015548375.1	d__Bacteria	p__Actinomycetota	c__Coriobacteriia	o__Coriobacteriales	f__Coriobacteriaceae	g__Collinsella	s__Collinsella aerofaciens_AB		81845	64	100	1.61	gtdb
GCA_900551305.1	d__Bacteria	p__Actinomycetota	c__Coriobacteriia	o__Coriobacteriales	f__Coriobacteriaceae	g__Collinsella	s__Collinsella sp900551305		7499	271	80.87	0.81	gtdb
GCA_934182615.1	d__Bacteria	p__Bacillota	c__Bacilli	o__RF39	f__UBA660	g__CAG-302	s__CAG-302 sp934182615		83013	26	91.29	1.12	gtdb
GCF_003460505.1	d__Bacteria	p__Bacillota_A	c__Clostridia	o__Lachnospirales	f__Lachnospiraceae	g__Eubacterium_G	s__Eubacterium_G sp000435815		267540	33	99.33	0	gtdb
GCF_015561195.1	d__Bacteria	p__Actinomycetota	c__Coriobacteriia	o__Coriobacteriales	f__Coriobacteriaceae	g__Collinsella	s__Collinsella aerofaciens_AC		173471	30	100	0.81	gtdb
GCA_900766355.1	d__Bacteria	p__Cyanobacteriota	c__Vampirovibrionia	o__Gastranaerophilales	f__Gastranaerophilaceae	g__UMGS1585	s__UMGS1585 sp900766355		73226	120	87.18	0.17	gtdb
GCA_900552145.1	d__Bacteria	p__Actinomycetota	c__Coriobacteriia	o__Coriobacteriales	f__Coriobacteriaceae	g__Collinsella	s__Collinsella sp900552145		19581	163	94.78	4.11	gtdb
GCF_016889425.1	d__Bacteria	p__Actinomycetota	c__Actinomycetia	o__Mycobacteriales	f__Mycobacteriaceae	g__Corynebacterium	s__Corynebacterium amycolatum		2474943	1	100	0	gtdb
GCA_934643185.1	d__Bacteria	p__Bacillota_A	c__Clostridia	o__Oscillospirales	f__Acutalibacteraceae	g__UBA1417	s__UBA1417 sp934643185		34135	100	97.57	0	gtdb
GCA_900549755.1	d__Bacteria	p__Bacillota_A	c__Clostridia	o__Oscillospirales	f__Acutalibacteraceae	g__UBA737	s__UBA737 sp900549755		24742	124	91.36	2.01	gtdb
GCA_900545955.1	d__Bacteria	p__Bacteroidota	c__Bacteroidia	o__Bacteroidales	f__Muribaculaceae	g__UBA7173	s__UBA7173 sp900545955		124991	32	91.51	0.38	gtdb
GCA_900541245.1	d__Bacteria	p__Actinomycetota	c__Coriobacteriia	o__Coriobacteriales	f__Coriobacteriaceae	g__Collinsella	s__Collinsella sp900541245		44059	67	100	0.81	gtdb
GCA_905221125.1	d__Bacteria	p__Bacillota	c__Bacilli	o__Lactobacillales	f__Streptococcaceae	g__Streptococcus	s__Streptococcus sp905221125		84199	161	99.42	1.05	gtdb
GCF_003324185.1	d__Bacteria	p__Bacillota_A	c__Clostridia	o__Oscillospirales	f__Ruminococcaceae	g__Faecalibacterium	s__Faecalibacterium prausnitzii		136767	76	100	0	gtdb
GCA_900547815.1	d__Bacteria	p__Bacillota	c__Bacilli	o__Erysipelotrichales	f__Erysipelotrichaceae	g__Holdemanella	s__Holdemanella sp900547815		25235	116	89.62	0.71	gtdb
GCF_004295125.1	d__Bacteria	p__Bacillota_A	c__Clostridia	o__Lachnospirales	f__Lachnospiraceae	g__Clostridium_AP	s__Clostridium_AP scindens		3658040	1	99.42	1.17	gtdb
GCA_900756765.1	d__Bacteria	p__Actinomycetota	c__Coriobacteriia	o__Coriobacteriales	f__Coriobacteriaceae	g__Collinsella	s__Collinsella sp900756765		81535	46	85.48	0.81	gtdb
GCA_934101745.1	d__Bacteria	p__Bacillota	c__Bacilli	o__RF39	f__UBA660	g__CAG-605	s__CAG-605 sp934101745		7505	174	59.9	0	gtdb
GCA_934255485.1	d__Bacteria	p__Bacteroidota	c__Bacteroidia	o__Bacteroidales	f__Bacteroidaceae	g__Alloprevotella	s__Alloprevotella sp934255485		55941	62	97.15	0	gtdb
GCA_019419455.1	d__Bacteria	p__Actinomycetota	c__Coriobacteriia	o__Coriobacteriales	f__Coriobacteriaceae	g__Collinsella	s__Collinsella sp019419455		64564	54	100	0.81	gtdb
GCA_008680965.1	d__Bacteria	p__Actinomycetota	c__Coriobacteriia	o__Coriobacteriales	f__Coriobacteriaceae	g__Collinsella	s__Collinsella aerofaciens_L		2371174	1	100	2.42	gtdb
GCA_900554835.1	d__Bacteria	p__Bacteroidota	c__Bacteroidia	o__Bacteroidales	f__Bacteroidaceae	g__Prevotella	s__Prevotella sp900554835		16323	398	77.07	2.59	gtdb
GCF_003477705.1	d__Bacteria	p__Bacillota_A	c__Clostridia	o__Lachnospirales	f__Lachnospiraceae	g__Lachnoclostridium_B	s__Lachnoclostridium_B sp900066555		311472	28	99.22	1.75	gtdb
GCF_003480255.1	d__Bacteria	p__Bacillota	c__Bacilli	o__Erysipelotrichales	f__Coprobacillaceae	g__Faecalibacillus	s__Faecalibacillus sp003480255		60582	67	99.06	0	gtdb
GCF_000613925.1	d__Bacteria	p__Bacteroidota	c__Bacteroidia	o__Bacteroidales	f__Bacteroidaceae	g__Prevotella	s__Prevotella histicola		151776	55	98.06	0	gtdb
GCF_023336935.1	d__Bacteria	p__Bacillota_C	c__Negativicutes	o__Acidaminococcales	f__Acidaminococcaceae	g__CAG-266	s__CAG-266 sp000436095		505558	12	99.4	0.6	gtdb
GCA_934162615.1	d__Bacteria	p__Bacillota_A	c__Clostridia	o__TANB77	f__CAG-508	g__CAG-269	s__CAG-269 sp934162615		38312	77	73.99	3.26	gtdb
GCA_902363875.1	d__Bacteria	p__Actinomycetota	c__Coriobacteriia	o__Coriobacteriales	f__Coriobacteriaceae	g__Collinsella	s__Collinsella sp902363875		51923	96	100	0.81	gtdb
GCA_900541145.1	d__Bacteria	p__Actinomycetota	c__Coriobacteriia	o__Coriobacteriales	f__Coriobacteriaceae	g__Collinsella	s__Collinsella sp900541145		87823	39	100	0.81	gtdb
GCF_009707925.1	d__Bacteria	p__Bacillota_A	c__Clostridia	o__Lachnospirales	f__Lachnospiraceae	g__Blautia_A	s__Blautia_A luti		205916	71	99.37	0.11	gtdb
GCA_915066865.1	d__Bacteria	p__Bacillota_C	c__Negativicutes	o__Veillonellales	f__Veillonellaceae	g__Veillonella	s__Veillonella sp915066865		21194	126	99.7	0.32	gtdb
GCA_934162685.1	d__Bacteria	p__Bacillota	c__Bacilli	o__RFN20	f__CAG-826	g__RUG131	s__RUG131 sp934162685		9792	278	82.58	2.3	gtdb
GCA_934190855.1	d__Bacteria	p__Bacillota_C	c__Negativicutes	o__Veillonellales	f__Veillonellaceae	g__Veillonella	s__Veillonella sp934190855		11170	237	87.33	0.9	gtdb
GCA_000434335.1	d__Bacteria	p__Bacillota_A	c__Clostridia	o__TANB77	f__CAG-508	g__CAG-492	s__CAG-492 sp000434335		21101	254	72.84	0.67	gtdb
GCA_900761475.1	d__Bacteria	p__Bacillota_A	c__Clostridia	o__TANB77	f__CAG-508	g__CAG-245	s__CAG-245 sp900761475		26718	144	65.38	2.8	gtdb
GCF_900291475.1	d__Bacteria	p__Bacillota_C	c__Negativicutes	o__Acidaminococcales	f__Acidaminococcaceae	g__Acidaminococcus	s__Acidaminococcus provencensis		627690	23	99.38	1.2	gtdb
GCA_934654795.1	d__Bacteria	p__Actinomycetota	c__Coriobacteriia	o__Coriobacteriales	f__Coriobacteriaceae	g__Collinsella	s__Collinsella sp934654795		61495	53	71.51	0.81	gtdb
GCA_900546665.1	d__Bacteria	p__Bacteroidota	c__Bacteroidia	o__Bacteroidales	f__Bacteroidaceae	g__Paraprevotella	s__Paraprevotella stercorigallinarum		98143	60	89.96	0.37	gtdb
GCF_001076775.1	d__Bacteria	p__Bacillota	c__Bacilli	o__Lactobacillales	f__Streptococcaceae	g__Streptococcus	s__Streptococcus pseudopneumoniae_G		132621	38	99.82	0.73	gtdb
GCA_900543805.1	d__Bacteria	p__Pseudomonadota	c__Gammaproteobacteria	o__Burkholderiales	f__Burkholderiaceae_A	g__Sutterella	s__Sutterella merdavium		88683	38	95.5	0.62	gtdb
GCA_900541185.1	d__Bacteria	p__Actinomycetota	c__Coriobacteriia	o__Coriobacteriales	f__Coriobacteriaceae	g__Collinsella	s__Collinsella sp900541185		28825	109	100	0.81	gtdb
GCA_025145645.1	d__Bacteria	p__Bacteroidota	c__Bacteroidia	o__Bacteroidales	f__Rikenellaceae	g__Alistipes	s__Alistipes senegalensis		4023197	1	99.76	0.48	gtdb
GCA_014871605.1	d__Bacteria	p__Actinomycetota	c__Coriobacteriia	o__Coriobacteriales	f__Coriobacteriaceae	g__Collinsella	s__Collinsella sp014871605		9504	304	97.21	1.7	gtdb
GCA_934148995.1	d__Bacteria	p__Bacillota	c__Bacilli	o__RF39	f__UBA660	g__Onthousia	s__Onthousia sp934148995		87139	27	93.82	2.81	gtdb
GCA_934486495.1	d__Bacteria	p__Bacillota_A	c__Clostridia	o__UBA1381	f__UBA1381	g__RGIG9115	s__RGIG9115 sp934486495		25934	162	95.75	0.89	gtdb
GCA_934254985.1	d__Bacteria	p__Bacteroidota	c__Bacteroidia	o__Bacteroidales	f__Bacteroidaceae	g__Prevotella	s__Prevotella sp934254985		58217	72	93.3	1.18	gtdb
GCF_002834225.1	d__Bacteria	p__Bacillota_A	c__Clostridia	o__Oscillospirales	f__Acutalibacteraceae	g__Ruminococcus_E	s__Ruminococcus_E bromii		80809	74	99.33	1.01	gtdb
GCF_000469345.1	d__Bacteria	p__Bacillota_A	c__Clostridia	o__Lachnospirales	f__Lachnospiraceae	g__Eubacterium_I	s__Eubacterium_I ramulus		40285	227	98.28	0.21	gtdb
GCA_905215595.1	d__Bacteria	p__Bacillota_A	c__Clostridia	o__Oscillospirales	f__Ruminococcaceae	g__Faecalibacterium	s__Faecalibacterium sp905215595		16265	202	75.01	0.23	gtdb
GCA_900548495.1	d__Bacteria	p__Actinomycetota	c__Coriobacteriia	o__Coriobacteriales	f__Coriobacteriaceae	g__Collinsella	s__Collinsella sp900548495		22729	149	93.55	1.88	gtdb
GCA_900545445.1	d__Bacteria	p__Actinomycetota	c__Coriobacteriia	o__Coriobacteriales	f__Coriobacteriaceae	g__Collinsella	s__Collinsella sp900545445		35288	88	98.39	1.61	gtdb
GCA_934876235.1	d__Bacteria	p__Actinomycetota	c__Coriobacteriia	o__Coriobacteriales	f__Coriobacteriaceae	g__Collinsella	s__Collinsella sp934876235		16810	202	96.65	0	gtdb
GCA_900768535.1	d__Bacteria	p__Bacillota_A	c__Clostridia	o__Oscillospirales	f__CAG-272	g__UMGS1865	s__UMGS1865 sp900768535		22223	209	91.9	0.92	gtdb
GCF_005221305.1	d__Bacteria	p__Pseudomonadota	c__Gammaproteobacteria	o__Burkholderiales	f__Neisseriaceae	g__Neisseria	s__Neisseria subflava		2195659	1	99.92	0.34	gtdb
GCA_900755685.1	d__Bacteria	p__Actinomycetota	c__Coriobacteriia	o__Coriobacteriales	f__Coriobacteriaceae	g__Collinsella	s__Collinsella sp900755685		46661	62	97.58	0.81	gtdb
GCF_014384995.1	d__Bacteria	p__Bacillota_A	c__Clostridia	o__Lachnospirales	f__Cellulosilyticaceae	g__Zhenhengia	s__Zhenhengia yiwuensis		102100	143	97.99	4.59	gtdb
GCF_000148545.1	d__Bacteria	p__Bacillota	c__Bacilli	o__Lactobacillales	f__Streptococcaceae	g__Streptococcus	s__Streptococcus mitis_C		31398	108	99.72	0.3	gtdb
GCA_019411365.1	d__Bacteria	p__Bacillota_A	c__Clostridia	o__Lachnospirales	f__Lachnospiraceae	g__Roseburia	s__Roseburia sp019411365		56635	69	74.82	3.26	gtdb
GCA_900772415.1	d__Bacteria	p__Bacillota	c__Bacilli	o__RF39	f__UBA660	g__Aphodocola	s__Aphodocola sp900772415		74348	66	92.42	2.81	gtdb
GCF_017873245.1	d__Bacteria	p__Bacillota_A	c__Clostridia	o__Clostridiales	f__Clostridiaceae	g__Clostridium	s__Clostridium tertium		184539	39	100	0.16	gtdb
GCF_002234575.2	d__Bacteria	p__Bacillota_A	c__Clostridia	o__Lachnospirales	f__Lachnospiraceae	g__Enterocloster	s__Enterocloster bolteae		6570176	2	99.32	0	gtdb
GCF_000210055.1	d__Bacteria	p__Actinomycetota	c__Coriobacteriia	o__Coriobacteriales	f__Eggerthellaceae	g__Gordonibacter	s__Gordonibacter pamelaeae		8540	690	75.96	0.81	gtdb
GCA_934717805.1	d__Bacteria	p__Patescibacteria	c__Saccharimonadia	o__Saccharimonadales	f__Nanogingivalaceae	g__Nanogingivalis	s__Nanogingivalis sp934717805		34819	31	60.32	0.09	gtdb
GCA_900553985.1	d__Bacteria	p__Bacillota_A	c__Clostridia	o__TANB77	f__CAG-508	g__CAG-269	s__CAG-269 sp900553985		42637	69	71.52	0.67	gtdb
GCF_001937445.1	d__Bacteria	p__Actinomycetota	c__Actinomycetia	o__Actinomycetales	f__Actinomycetaceae	g__Actinomyces	s__Actinomyces oris_C		68048	104	100	0.95	gtdb
GCF_002998925.1	d__Bacteria	p__Bacillota_A	c__Clostridia	o__Peptostreptococcales	f__Anaerovoracaceae	g__Mogibacterium	s__Mogibacterium diversum		1815831	1	99.29	0	gtdb
GCA_000285855.2	d__Bacteria	p__Bacillota_A	c__Clostridia	o__Lachnospirales	f__Lachnospiraceae	g__Blautia_A	s__Blautia_A sp000285855		72769	526	99.37	2.24	gtdb
GCA_900541415.1	d__Bacteria	p__Bacteroidota	c__Bacteroidia	o__Bacteroidales	f__Marinifilaceae	g__Odoribacter	s__Odoribacter sp900541415		107109	49	97.04	0.27	gtdb
GCA_900540895.1	d__Bacteria	p__Actinomycetota	c__Coriobacteriia	o__Coriobacteriales	f__Coriobacteriaceae	g__Collinsella	s__Collinsella sp900540895		82687	38	100	0.81	gtdb
GCF_000722765.2	d__Bacteria	p__Bacillota	c__Bacilli	o__Lactobacillales	f__Streptococcaceae	g__Streptococcus	s__Streptococcus mitis_AQ		1942107	1	99.68	0.2	gtdb
GCA_900542625.1	d__Bacteria	p__Fusobacteriota	c__Fusobacteriia	o__Fusobacteriales	f__Fusobacteriaceae	g__Fusobacterium_B	s__Fusobacterium_B sp900542625		24539	149	99.44	1.12	gtdb
GCA_905215815.1	d__Bacteria	p__Actinomycetota	c__Coriobacteriia	o__Coriobacteriales	f__Coriobacteriaceae	g__Collinsella	s__Collinsella sp905215815		21476	139	92.88	2.77	gtdb
GCA_934316845.1	d__Bacteria	p__Bacillota_A	c__Clostridia	o__Lachnospirales	f__Lachnospiraceae	g__Eubacterium_F	s__Eubacterium_F sp934316845		75101	68	95.3	0	gtdb
GCF_023614525.1	d__Bacteria	p__Bacillota_A	c__Clostridia	o__Tissierellales	f__Peptoniphilaceae	g__Peptoniphilus_A	s__Peptoniphilus_A harei_A		1917962	1	99.3	0	gtdb
GCA_934320645.1	d__Bacteria	p__Bacillota_A	c__Clostridia	o__Lachnospirales	f__Lachnospiraceae	g__Bariatricus	s__Bariatricus sp934320645		57003	81	95.91	0.19	gtdb
GCA_018223365.1	d__Bacteria	p__Bacillota_A	c__Clostridia	o__Lachnospirales	f__Lachnospiraceae	g__Choladocola	s__Choladocola sp018223365		1187305	4	99.37	1.27	gtdb
GCA_900549855.1	d__Bacteria	p__Cyanobacteriota	c__Vampirovibrionia	o__Gastranaerophilales	f__Gastranaerophilaceae	g__CAG-196	s__CAG-196 sp900549855		41997	92	90.6	1.9	gtdb
GCF_019685515.1	d__Bacteria	p__Bacillota	c__Bacilli	o__Lactobacillales	f__Streptococcaceae	g__Streptococcus	s__Streptococcus sp900550895		1748073	4	99.87	0.2	gtdb
GCA_025149125.1	d__Bacteria	p__Bacillota_A	c__Clostridia	o__Lachnospirales	f__Lachnospiraceae	g__Enterocloster	s__Enterocloster asparagiformis		6353279	1	99.22	0.63	gtdb
GCA_900754745.1	d__Bacteria	p__Actinomycetota	c__Coriobacteriia	o__Coriobacteriales	f__Coriobacteriaceae	g__Collinsella	s__Collinsella sp900754745		43302	106	95.97	4.5	gtdb
GCA_905206195.1	d__Bacteria	p__Bacillota_A	c__Clostridia	o__Lachnospirales	f__Lachnospiraceae	g__Roseburia	s__Roseburia sp905206195		5755	384	80.81	1.13	gtdb
GCA_934636865.1	d__Bacteria	p__Bacillota_A	c__Clostridia	o__Oscillospirales	f__Oscillospiraceae	g__ER4	s__ER4 sp934636865		52583	54	96.41	0	gtdb
GCF_013276795.1	d__Bacteria	p__Bacillota	c__Bacilli	o__Lactobacillales	f__Streptococcaceae	g__Streptococcus	s__Streptococcus sp013276795		175292	29	99.82	0.2	gtdb
GCA_934512105.1	d__Bacteria	p__Bacillota_A	c__Clostridia	o__Oscillospirales	f__Ruminococcaceae	g__Faecalibacterium	s__Faecalibacterium sp934512105		40486	106	83.93	1.87	gtdb
GCA_000509105.1	d__Bacteria	p__Bacillota_A	c__Clostridia	o__Lachnospirales	f__Lachnospiraceae	g__Muricomes	s__Muricomes sp000509105		85088	143	98.83	0	gtdb
GCF_013277415.1	d__Bacteria	p__Bacillota	c__Bacilli	o__Lactobacillales	f__Streptococcaceae	g__Streptococcus	s__Streptococcus sp013277415		123565	39	99.82	0.4	gtdb
GCF_002161055.1	d__Bacteria	p__Bacillota_A	c__Clostridia	o__Lachnospirales	f__Anaerotignaceae	g__Fimicola	s__Fimicola cottocaccae		245993	78	98.66	0	gtdb
GCA_018368345.1	d__Bacteria	p__Actinomycetota	c__Coriobacteriia	o__Coriobacteriales	f__Coriobacteriaceae	g__Collinsella	s__Collinsella sp018368345		148909	53	100	0.81	gtdb
GCF_002761955.1	d__Bacteria	p__Fusobacteriota	c__Fusobacteriia	o__Fusobacteriales	f__Fusobacteriaceae	g__Fusobacterium	s__Fusobacterium pseudoperiodonticum		2376875	2	100	0.56	gtdb
GCF_003574295.1	d__Bacteria	p__Bacillota_A	c__Clostridia	o__Lachnospirales	f__Lachnospiraceae	g__Mediterraneibacter_A	s__Mediterraneibacter_A butyricigenes		2916053	7	98.64	0.15	gtdb
GCF_013304825.1	d__Bacteria	p__Bacillota_A	c__Clostridia	o__Lachnospirales	f__Lachnospiraceae	g__Blautia_A	s__Blautia_A schinkii		148240	57	99.37	0.32	gtdb
GCA_910589675.1	d__Bacteria	p__Bacillota	c__Bacilli	o__Lactobacillales	f__Lactobacillaceae	g__Lactobacillus	s__Lactobacillus sp910589675		52017	62	90.12	2.33	gtdb
GCA_900552455.1	d__Bacteria	p__Bacillota_B	c__Peptococcia	o__Peptococcales	f__Peptococcaceae	g__UMGS1590	s__UMGS1590 sp900552455		69529	57	80.79	1.53	gtdb
GCA_944324075.1	d__Bacteria	p__Desulfobacterota	c__Desulfovibrionia	o__Desulfovibrionales	f__Desulfovibrionaceae	g__Mailhella	s__Mailhella excrementigallinarum		128314	51	99.7	0.59	gtdb
GCA_900553855.1	d__Bacteria	p__Bacillota	c__Bacilli	o__RF39	f__UBA660	g__CAG-533	s__CAG-533 sp900553855		95631	27	91.01	4.49	gtdb
GCA_900550165.1	d__Bacteria	p__Bacillota_A	c__Clostridia	o__Oscillospirales	f__Oscillospiraceae	g__ER4	s__ER4 sp900550165		36502	71	90.14	2.01	gtdb
GCA_900551355.1	d__Bacteria	p__Bacillota_A	c__Clostridia	o__Oscillospirales	f__Oscillospiraceae	g__Vescimonas	s__Vescimonas sp900551355		10377	195	81.64	1.01	gtdb
GCA_019334725.1	d__Bacteria	p__Pseudomonadota	c__Gammaproteobacteria	o__Burkholderiales	f__Neisseriaceae	g__Neisseria	s__Neisseria subflava_A		2284668	1	99.92	1.58	gtdb
GCA_900548465.1	d__Bacteria	p__Bacillota_A	c__Clostridia	o__Lachnospirales	f__Lachnospiraceae	g__Eubacterium_G	s__Eubacterium_G sp900548465		46426	117	97.54	2.68	gtdb
GCA_014871665.1	d__Bacteria	p__Actinomycetota	c__Coriobacteriia	o__Coriobacteriales	f__Coriobacteriaceae	g__Collinsella	s__Collinsella sp014871665		24997	130	99.23	1.77	gtdb
GCA_900541175.1	d__Bacteria	p__Actinomycetota	c__Coriobacteriia	o__Coriobacteriales	f__Coriobacteriaceae	g__Collinsella	s__Collinsella sp900541175		65943	53	100	0.81	gtdb
GCA_900759995.1	d__Bacteria	p__Bacillota_A	c__Clostridia	o__Clostridiales	f__Clostridiaceae	g__Clostridium	s__Clostridium sp900759995		16615	302	97.58	2.13	gtdb
GCF_003473545.1	d__Bacteria	p__Bacillota_A	c__Clostridia	o__Lachnospirales	f__Lachnospiraceae	g__Enterocloster	s__Enterocloster sp000431375		124321	64	99.37	0.63	gtdb
GCA_900765185.1	d__Bacteria	p__Actinomycetota	c__Coriobacteriia	o__Coriobacteriales	f__Coriobacteriaceae	g__Collinsella	s__Collinsella sp900765185		10010	297	79.72	2.25	gtdb
GCA_003531585.1	d__Bacteria	p__Bacillota_A	c__Clostridia	o__Oscillospirales	f__Ruminococcaceae	g__CAG-115	s__CAG-115 sp003531585		44793	128	95.97	0	gtdb
GCA_900556875.1	d__Bacteria	p__Actinomycetota	c__Coriobacteriia	o__Coriobacteriales	f__Coriobacteriaceae	g__Collinsella	s__Collinsella sp900556875		106069	31	58.87	0.81	gtdb
GCA_905214675.1	d__Bacteria	p__Bacillota_A	c__Clostridia	o__Lachnospirales	f__Lachnospiraceae	g__Hominisplanchenecus	s__Hominisplanchenecus sp905214675		29314	109	59.97	0.79	gtdb
GCA_900542145.1	d__Bacteria	p__Bacillota_A	c__Clostridia	o__Oscillospirales	f__Ruminococcaceae	g__CAG-115	s__CAG-115 sp003507295		118526	45	97.99	0.67	gtdb
GCA_900551945.1	d__Bacteria	p__Bacillota_A	c__Clostridia	o__Lachnospirales	f__Lachnospiraceae	g__Lachnospira	s__Lachnospira sp900551945		29651	139	83.33	1.75	gtdb
GCF_016907775.1	d__Bacteria	p__Actinomycetota	c__Actinomycetia	o__Actinomycetales	f__Micrococcaceae	g__Pseudoglutamicibacter	s__Pseudoglutamicibacter cumminsii		2259253	1	96.17	1.49	gtdb
GCA_001915995.1	d__Bacteria	p__Bacillota_A	c__Clostridia	o__TANB77	f__CAG-508	g__CAG-269	s__CAG-269 sp001915995		149900	26	76	2.46	gtdb
GCF_001042595.1	d__Bacteria	p__Actinomycetota	c__Actinomycetia	o__Actinomycetales	f__Bifidobacteriaceae	g__Bifidobacterium	s__Bifidobacterium dentium		2635669	1	100	0	gtdb
GCF_001875655.1	d__Bacteria	p__Pseudomonadota	c__Gammaproteobacteria	o__Enterobacterales	f__Enterobacteriaceae	g__Enterobacter	s__Enterobacter hormaechei		3831920	9	99.97	0.4	gtdb
GCF_009755685.1	d__Bacteria	p__Pseudomonadota	c__Gammaproteobacteria	o__Enterobacterales	f__Enterobacteriaceae	g__Enterobacter	s__Enterobacter sp000568095		4748641	1	98.78	0.63	gtdb
GCA_900556395.1	d__Bacteria	p__Bacteroidota	c__Bacteroidia	o__Bacteroidales	f__Bacteroidaceae	g__Prevotella	s__Prevotella sp900556395		28612	123	65.69	1.72	gtdb
GCA_905207935.1	d__Bacteria	p__Pseudomonadota	c__Gammaproteobacteria	o__Enterobacterales_A	f__Pasteurellaceae	g__Haemophilus_D	s__Haemophilus_D sp905207935		15040	189	93.05	1.17	gtdb
GCA_905215525.1	d__Bacteria	p__Actinomycetota	c__Coriobacteriia	o__Coriobacteriales	f__Coriobacteriaceae	g__Collinsella	s__Collinsella sp905215525		209426	20	100	1.61	gtdb
GCA_900756155.1	d__Bacteria	p__Pseudomonadota	c__Gammaproteobacteria	o__Enterobacterales_A	f__Pasteurellaceae	g__Haemophilus_D	s__Haemophilus_D sp900756155		164755	37	99.43	0.09	gtdb
GCF_022430525.1	d__Bacteria	p__Fusobacteriota	c__Fusobacteriia	o__Fusobacteriales	f__Fusobacteriaceae	g__Cetobacterium_A	s__Cetobacterium_A sp905216205		1904440	7	98.88	0	gtdb
GCF_900475885.1	d__Bacteria	p__Pseudomonadota	c__Gammaproteobacteria	o__Enterobacterales_A	f__Pasteurellaceae	g__Haemophilus	s__Haemophilus aegyptius		1993258	1	99.56	0	gtdb
GCA_934654605.1	d__Bacteria	p__Actinomycetota	c__Coriobacteriia	o__Coriobacteriales	f__Coriobacteriaceae	g__Collinsella	s__Collinsella sp934654605		24472	116	62.5	0	gtdb
GCA_905213725.1	d__Bacteria	p__Actinomycetota	c__Coriobacteriia	o__Coriobacteriales	f__Coriobacteriaceae	g__Collinsella	s__Collinsella aerofaciens_R		14012	209	96.39	1.21	gtdb
GCA_900760795.1	d__Bacteria	p__Bacteroidota	c__Bacteroidia	o__Bacteroidales	f__Bacteroidaceae	g__Phocaeicola	s__Phocaeicola sp900760795		48107	210	89.9	6.84	gtdb
GCA_900767415.1	d__Bacteria	p__Bacillota_A	c__Clostridia	o__Oscillospirales	f__CAG-272	g__UBA1740	s__UBA1740 sp900767415		52662	56	88.48	0.02	gtdb
GCA_019419725.1	d__Bacteria	p__Bacillota_C	c__Negativicutes	o__Veillonellales	f__Veillonellaceae	g__Veillonella	s__Veillonella sp019419725		9003	248	83.72	1.11	gtdb
GCA_022009935.1	d__Bacteria	p__Cyanobacteriota	c__Vampirovibrionia	o__Gastranaerophilales	f__Gastranaerophilaceae	g__UMGS1477	s__UMGS1477 sp900552205		1996896	1	71.37	1.23	gtdb
GCF_001579035.1	d__Bacteria	p__Bacillota	c__Bacilli	o__Lactobacillales	f__Streptococcaceae	g__Streptococcus	s__Streptococcus mitis_J		6560	521	95.45	0.23	gtdb
GCF_013393365.1	d__Bacteria	p__Bacillota_C	c__Negativicutes	o__Veillonellales	f__Veillonellaceae	g__Veillonella	s__Veillonella nakazawae		2097818	1	99.8	0	gtdb
GCA_934204655.1	d__Bacteria	p__Bacteroidota	c__Bacteroidia	o__Bacteroidales	f__Bacteroidaceae	g__Prevotella	s__Prevotella sp934204655		77399	43	95.8	0	gtdb
GCA_934149075.1	d__Bacteria	p__Bacillota_A	c__Clostridia	o__TANB77	f__CAG-508	g__CAG-269	s__CAG-269 sp934149075		90249	25	71.08	3.76	gtdb
GCF_002763915.1	d__Bacteria	p__Fusobacteriota	c__Fusobacteriia	o__Fusobacteriales	f__Fusobacteriaceae	g__Fusobacterium	s__Fusobacterium periodonticum_D		2643576	1	100	1.69	gtdb
GCA_934700615.1	d__Bacteria	p__Bacteroidota	c__Bacteroidia	o__Bacteroidales	f__UBA932	g__Cryptobacteroides	s__Cryptobacteroides sp934700615		93828	54	96.43	0.03	gtdb
GCA_934418125.1	d__Bacteria	p__Bacillota_A	c__Clostridia	o__Lachnospirales	f__Lachnospiraceae	g__UBA3282	s__UBA3282 sp934418125		62654	61	91.95	0.57	gtdb
GCF_000614125.1	d__Bacteria	p__Bacteroidota	c__Bacteroidia	o__Bacteroidales	f__Bacteroidaceae	g__Bacteroides	s__Bacteroides rodentium		78229	148	95.52	0.5	gtdb
GCA_019414325.1	d__Bacteria	p__Actinomycetota	c__Coriobacteriia	o__Coriobacteriales	f__Coriobacteriaceae	g__Collinsella	s__Collinsella sp019414325		28655	120	100	1.88	gtdb
GCF_000278725.1	d__Bacteria	p__Actinomycetota	c__Actinomycetia	o__Actinomycetales	f__Actinomycetaceae	g__Pauljensenia	s__Pauljensenia sp000278725		25020	143	100	0.95	gtdb
GCA_905214425.1	d__Bacteria	p__Actinomycetota	c__Coriobacteriia	o__Coriobacteriales	f__Coriobacteriaceae	g__Collinsella	s__Collinsella sp905214425		66602	58	100	1.61	gtdb
GCF_000982825.1	d__Bacteria	p__Pseudomonadota	c__Gammaproteobacteria	o__Enterobacterales	f__Enterobacteriaceae	g__Cronobacter	s__Cronobacter sakazakii		4511265	4	99.97	0.2	gtdb
GCF_002902665.1	d__Bacteria	p__Bacillota	c__Bacilli	o__Staphylococcales	f__Staphylococcaceae	g__Macrococcus_B	s__Macrococcus_B caseolyticus		46917	144	96.69	0.55	gtdb
GCA_901472455.1	d__Bacteria	p__Pseudomonadota	c__Gammaproteobacteria	o__Enterobacterales	f__Enterobacteriaceae	g__Leclercia	s__Leclercia adecarboxylata		5062884	1	88.93	0.43	gtdb
GCA_905204915.1	d__Bacteria	p__Bacillota_A	c__Clostridia	o__TANB77	f__CAG-465	g__CAG-465	s__CAG-465 sp905204915		21545	80	64.97	0.58	gtdb
GCA_934617135.1	d__Bacteria	p__Actinomycetota	c__Coriobacteriia	o__Coriobacteriales	f__Coriobacteriaceae	g__Collinsella	s__Collinsella sp934617135		19995	107	53.45	0	gtdb
GCF_011078175.1	d__Bacteria	p__Pseudomonadota	c__Gammaproteobacteria	o__Enterobacterales	f__Enterobacteriaceae	g__Enterobacter	s__Enterobacter cloacae_Q		476960	34	99.89	0.08	gtdb
GCF_001679485.1	d__Bacteria	p__Pseudomonadota	c__Gammaproteobacteria	o__Enterobacterales_A	f__Pasteurellaceae	g__Haemophilus_D	s__Haemophilus_D sp001679485		189401	26	99.89	0.23	gtdb
GCA_014846205.1	d__Bacteria	p__Actinomycetota	c__Coriobacteriia	o__Coriobacteriales	f__Coriobacteriaceae	g__Collinsella	s__Collinsella aerofaciens_AE		8809	174	50.86	3.45	gtdb
GCA_934130175.1	d__Bacteria	p__Bacillota	c__Bacilli	o__RF39	f__UBA660	g__UMGS995	s__UMGS995 sp934130175		73034	28	92.7	1.69	gtdb
GCA_905221245.1	d__Bacteria	p__Bacillota	c__Bacilli	o__Lactobacillales	f__Streptococcaceae	g__Streptococcus	s__Streptococcus sp905221245		344892	67	99.42	0.4	gtdb
GCA_900548615.1	d__Bacteria	p__Bacillota_A	c__Clostridia	o__Oscillospirales	f__Oscillospiraceae	g__Vescimonas	s__Vescimonas sp900548615		18139	162	86.12	0.4	gtdb
GCA_019424245.1	d__Bacteria	p__Bacillota_A	c__Clostridia	o__Lachnospirales	f__Lachnospiraceae	g__Lachnospira	s__Lachnospira sp019424245		149052	17	75.17	0.67	gtdb
GCF_900184685.1	d__Bacteria	p__Bacteroidota	c__Bacteroidia	o__Bacteroidales	f__Marinifilaceae	g__Butyricimonas	s__Butyricimonas sp900184685		1413503	7	100	0	gtdb
GCA_934435195.1	d__Bacteria	p__Bacillota_A	c__Clostridia	o__Lachnospirales	f__Lachnospiraceae	g__Schaedlerella	s__Schaedlerella sp934435195		94105	56	98.83	0	gtdb
GCA_900542165.1	d__Bacteria	p__Actinomycetota	c__Coriobacteriia	o__Coriobacteriales	f__Coriobacteriaceae	g__Collinsella	s__Collinsella sp900542165		60187	56	100	1.08	gtdb
GCA_900543455.1	d__Bacteria	p__Bacillota_C	c__Negativicutes	o__Veillonellales	f__Dialisteraceae	g__Dialister	s__Dialister sp900543455		21285	160	96.08	0.63	gtdb
GCF_003436275.1	d__Bacteria	p__Actinomycetota	c__Coriobacteriia	o__Coriobacteriales	f__Coriobacteriaceae	g__Collinsella	s__Collinsella sp003436275		90211	65	100	1.61	gtdb
GCF_018918045.1	d__Bacteria	p__Bacillota_A	c__Clostridia	o__Oscillospirales	f__Oscillospiraceae	g__Faecousia	s__Faecousia sp018918045		45556	75	90.6	0	gtdb
GCF_002160305.1	d__Bacteria	p__Bacillota_A	c__Clostridia	o__Oscillospirales	f__Oscillospiraceae	g__Lawsonibacter	s__Lawsonibacter pullicola		56405	162	99.33	0.67	gtdb
GCA_900549045.1	d__Bacteria	p__Verrucomicrobiota	c__Lentisphaeria	o__Victivallales	f__UBA1829	g__UBA1829	s__UBA1829 sp900549045		6475	520	86.42	0.68	gtdb
GCA_934317185.1	d__Bacteria	p__Bacillota_A	c__Clostridia	o__Lachnospirales	f__Lachnospiraceae	g__Anaerobutyricum	s__Anaerobutyricum sp934317185		11794	255	85.29	0.67	gtdb
GCA_018380195.1	d__Bacteria	p__Actinomycetota	c__Coriobacteriia	o__Coriobacteriales	f__Coriobacteriaceae	g__Collinsella	s__Collinsella sp018380195		75487	57	100	0.81	gtdb
GCF_900155365.1	d__Bacteria	p__Actinomycetota	c__Coriobacteriia	o__Coriobacteriales	f__Coriobacteriaceae	g__Collinsella	s__Collinsella bouchesdurhonensis		208338	24	100	0.81	gtdb
GCF_002232035.1	d__Bacteria	p__Actinomycetota	c__Coriobacteriia	o__Coriobacteriales	f__Coriobacteriaceae	g__Collinsella	s__Collinsella sp002232035		114818	46	100	1.61	gtdb
GCF_000424325.1	d__Bacteria	p__Bacillota_A	c__Clostridia	o__Lachnospirales	f__Lachnospiraceae	g__Enterocloster	s__Enterocloster clostridioformis_A		82627	138	99.32	0	gtdb
GCA_900549625.1	d__Bacteria	p__Bacillota	c__Bacilli	o__RF39	f__UBA660	g__Ventrenecus	s__Ventrenecus sp900549625		36088	45	92.7	2.25	gtdb
GCF_900079775.1	d__Bacteria	p__Bacteroidota	c__Bacteroidia	o__Bacteroidales	f__Bacteroidaceae	g__Prevotella	s__Prevotella lascolaii		582839	42	99.26	0	gtdb
GCA_900557405.1	d__Bacteria	p__Bacteroidota	c__Bacteroidia	o__Bacteroidales	f__Bacteroidaceae	g__Prevotella	s__Prevotella sp900557405		30479	96	52.07	0	gtdb
GCF_001729765.1	d__Bacteria	p__Pseudomonadota	c__Gammaproteobacteria	o__Enterobacterales	f__Enterobacteriaceae	g__Enterobacter	s__Enterobacter kobei		4880257	2	99.11	0.81	gtdb
GCA_900553125.1	d__Bacteria	p__Bacillota_A	c__Clostridia	o__TANB77	f__CAG-508	g__CAG-269	s__CAG-269 sp900553125		51128	54	74.32	0.67	gtdb
GCA_900542245.1	d__Bacteria	p__Bacillota_A	c__Clostridia	o__Peptostreptococcales	f__Anaerovoracaceae	g__CAG-238	s__CAG-238 sp900542245		15722	202	94.49	0	gtdb
GCA_900764695.1	d__Bacteria	p__Bacillota_A	c__Clostridia	o__Lachnospirales	f__Lachnospiraceae	g__Eubacterium_G	s__Eubacterium_G sp900764695		37976	105	83.56	6.31	gtdb
GCA_934540955.1	d__Bacteria	p__Bacillota_A	c__Clostridia	o__Oscillospirales	f__Ruminococcaceae	g__Faecalibacterium	s__Faecalibacterium sp934540955		28669	137	90.22	1.02	gtdb
GCA_900553695.1	d__Bacteria	p__Bacillota_A	c__Clostridia	o__TANB77	f__CAG-508	g__UMGS1781	s__UMGS1781 sp900553695		40101	48	72.09	0.51	gtdb
GCA_900547225.1	d__Bacteria	p__Bacillota	c__Bacilli	o__RF39	f__UBA660	g__Aphodocola	s__Aphodocola sp900547225		176718	10	92.7	1.12	gtdb
GCF_008693105.1	d__Bacteria	p__Actinomycetota	c__Actinomycetia	o__Mycobacteriales	f__Mycobacteriaceae	g__Corynebacterium	s__Corynebacterium flavescens		144965	46	99.78	0	gtdb
GCA_934418055.1	d__Bacteria	p__Bacillota_A	c__Clostridia	o__Lachnospirales	f__Lachnospiraceae	g__UBA3402	s__UBA3402 sp934418055		7393	556	90.08	2.64	gtdb
GCA_025148635.1	d__Bacteria	p__Bacteroidota	c__Bacteroidia	o__Bacteroidales	f__Marinifilaceae	g__Butyricimonas	s__Butyricimonas virosa		4813254	1	99.46	0	gtdb
GCA_900544205.1	d__Bacteria	p__Actinomycetota	c__Coriobacteriia	o__Coriobacteriales	f__Coriobacteriaceae	g__Collinsella	s__Collinsella sp900544205		27825	126	95.97	0.81	gtdb
GCA_022769285.1	d__Bacteria	p__Bacteroidota	c__Bacteroidia	o__Bacteroidales	f__Bacteroidaceae	g__Prevotella	s__Prevotella sp022769285		55437	52	92.48	0.37	gtdb
GCA_900542085.1	d__Bacteria	p__Actinomycetota	c__Coriobacteriia	o__Coriobacteriales	f__Coriobacteriaceae	g__Collinsella	s__Collinsella sp900542085		71143	58	100	1.08	gtdb
GCF_018917525.1	d__Bacteria	p__Bacillota	c__Bacilli	o__Lactobacillales	f__Enterococcaceae	g__Enterococcus_A	s__Enterococcus_A raffinosus_A		88761	109	99.31	6.12	gtdb
GCA_900541885.1	d__Bacteria	p__Actinomycetota	c__Coriobacteriia	o__Coriobacteriales	f__Coriobacteriaceae	g__Collinsella	s__Collinsella sp900541885		64116	53	99.19	0.81	gtdb
GCA_900551205.1	d__Bacteria	p__Actinomycetota	c__Coriobacteriia	o__Coriobacteriales	f__Coriobacteriaceae	g__Collinsella	s__Collinsella sp900551205		9014	267	89.27	2.42	gtdb
GCA_900544875.1	d__Bacteria	p__Actinomycetota	c__Coriobacteriia	o__Coriobacteriales	f__Coriobacteriaceae	g__Collinsella	s__Collinsella sp900544875		75698	48	99.19	1.61	gtdb
GCA_004553545.1	d__Bacteria	p__Bacillota_A	c__Clostridia	o__Oscillospirales	f__Oscillospiraceae	g__Dysosmobacter	s__Dysosmobacter sp004553545		44239	89	92.06	4.99	gtdb
GCA_945865665.1	d__Bacteria	p__Bacillota_A	c__Clostridia	o__TANB77	f__CAG-508	g__CAG-269	s__CAG-269 sp945865665		116105	29	75.21	0.34	gtdb
GCF_900683735.1	d__Bacteria	p__Fusobacteriota	c__Fusobacteriia	o__Fusobacteriales	f__Fusobacteriaceae	g__Fusobacterium_A	s__Fusobacterium_A ulcerans_A		3839419	1	100	2.25	gtdb
GCA_022745215.1	d__Bacteria	p__Actinomycetota	c__Coriobacteriia	o__Coriobacteriales	f__Coriobacteriaceae	g__Collinsella	s__Collinsella sp022745215		25438	129	90.34	1.45	gtdb
GCA_934465535.1	d__Bacteria	p__Bacillota_A	c__Clostridia	o__Christensenellales	f__QALW01	g__UMGS1338	s__UMGS1338 sp934465535		111556	20	64.43	0.34	gtdb
GCA_900545055.1	d__Bacteria	p__Actinomycetota	c__Coriobacteriia	o__Coriobacteriales	f__Coriobacteriaceae	g__Collinsella	s__Collinsella sp900545055		28978	123	94.96	0.81	gtdb
GCF_000375525.1	d__Bacteria	p__Actinomycetota	c__Actinomycetia	o__Mycobacteriales	f__Mycobacteriaceae	g__Corynebacterium	s__Corynebacterium propinquum		178218	22	99.78	0	gtdb
GCF_003467125.1	d__Bacteria	p__Bacillota_C	c__Negativicutes	o__Veillonellales	f__Megasphaeraceae	g__Caecibacter	s__Caecibacter sp003467125		99029	69	100	1.6	gtdb
GCA_900557255.1	d__Bacteria	p__Bacteroidota	c__Bacteroidia	o__Bacteroidales	f__Bacteroidaceae	g__Prevotella	s__Prevotella sp900557255		15755	280	52.59	0	gtdb
GCA_900550185.1	d__Bacteria	p__Actinomycetota	c__Coriobacteriia	o__Coriobacteriales	f__Coriobacteriaceae	g__Collinsella	s__Collinsella sp900550185		11540	248	93.03	2.69	gtdb
GCA_900553215.1	d__Bacteria	p__Actinomycetota	c__Coriobacteriia	o__Coriobacteriales	f__Coriobacteriaceae	g__Collinsella	s__Collinsella sp900553215		6600	303	80.13	1.88	gtdb
GCF_001544215.1	d__Bacteria	p__Bacillota	c__Bacilli	o__Lactobacillales	f__Enterococcaceae	g__Enterococcus_B	s__Enterococcus_B durans		53575	122	99.63	1.12	gtdb
GCA_934294775.1	d__Bacteria	p__Bacillota_A	c__Clostridia	o__Lachnospirales	f__Lachnospiraceae	g__Dorea_A	s__Dorea_A sp934294775		52422	101	99.42	0	gtdb
GCA_934120675.1	d__Bacteria	p__Bacillota_A	c__Clostridia	o__TANB77	f__CAG-508	g__CAG-269	s__CAG-269 sp934120675		70476	38	71.86	1.12	gtdb
GCA_900541035.1	d__Bacteria	p__Actinomycetota	c__Coriobacteriia	o__Coriobacteriales	f__Coriobacteriaceae	g__Collinsella	s__Collinsella sp900541035		74694	43	100	0.81	gtdb
GCA_000436035.1	d__Bacteria	p__Bacteroidota	c__Bacteroidia	o__Bacteroidales	f__Bacteroidaceae	g__Prevotella	s__Prevotella sp000436035		28953	193	91.75	0.96	gtdb
GCF_019968765.1	d__Bacteria	p__Pseudomonadota	c__Gammaproteobacteria	o__Enterobacterales	f__Enterobacteriaceae	g__Enterobacter	s__Enterobacter sp019968765		4819532	5	99.97	0.37	gtdb
GCF_004354555.1	d__Bacteria	p__Bacillota	c__Bacilli	o__Lactobacillales	f__Lactobacillaceae	g__Leuconostoc	s__Leuconostoc citreum		522104	10	99.89	0	gtdb
GCA_902373455.1	d__Bacteria	p__Bacillota	c__Bacilli	o__Lactobacillales	f__Streptococcaceae	g__Streptococcus	s__Streptococcus sp902373455		8390	227	71.66	0.86	gtdb
GCA_023441725.1	d__Bacteria	p__Actinomycetota	c__Coriobacteriia	o__Coriobacteriales	f__Coriobacteriaceae	g__Collinsella	s__Collinsella sp023441725		6173	201	54.53	0.81	gtdb
GCA_905205195.1	d__Bacteria	p__Bacillota_A	c__Clostridia	o__Oscillospirales	f__Oscillospiraceae	g__Faecousia	s__Faecousia sp900762935		25915	153	93.63	0.67	gtdb
GCF_001813295.1	d__Bacteria	p__Bacillota	c__Bacilli	o__Lactobacillales	f__Streptococcaceae	g__Streptococcus	s__Streptococcus sp001813295		54187	110	100	0.17	gtdb
GCA_002314325.1	d__Bacteria	p__Bacillota_C	c__Negativicutes	o__Selenomonadales	f__Selenomonadaceae	g__Megamonas	s__Megamonas hypermegale_A		56131	84	98.42	1.27	gtdb
GCA_934454125.1	d__Bacteria	p__Bacillota_A	c__Clostridia	o__Oscillospirales	f__Acutalibacteraceae	g__UMGS1071	s__UMGS1071 sp934454125		101164	14	66.44	0	gtdb
GCA_018377375.1	d__Bacteria	p__Bacillota	c__Bacilli	o__Lactobacillales	f__Streptococcaceae	g__Streptococcus	s__Streptococcus parasanguinis_N		28306	115	91.36	4.44	gtdb
GCF_001070815.1	d__Bacteria	p__Bacillota	c__Bacilli	o__Lactobacillales	f__Streptococcaceae	g__Streptococcus	s__Streptococcus pseudopneumoniae_P		44894	74	99.82	0.2	gtdb
GCF_900106755.1	d__Bacteria	p__Bacteroidota	c__Bacteroidia	o__Bacteroidales	f__Bacteroidaceae	g__Bacteroides	s__Bacteroides faecis		177924	77	99.06	0.05	gtdb
GCF_003999875.1	d__Bacteria	p__Bacillota_C	c__Negativicutes	o__Veillonellales	f__Veillonellaceae	g__F0422	s__F0422 sp003999875		311068	16	99.88	0.6	gtdb
GCF_001277215.2	d__Bacteria	p__Pseudomonadota	c__Gammaproteobacteria	o__Enterobacterales	f__Enterobacteriaceae	g__Cronobacter	s__Cronobacter malonaticus		4294639	3	99.97	0.07	gtdb
GCF_002925905.1	d__Bacteria	p__Pseudomonadota	c__Gammaproteobacteria	o__Enterobacterales	f__Enterobacteriaceae	g__Klebsiella	s__Klebsiella michiganensis		392021	32	99.63	0.62	gtdb
GCF_015546965.1	d__Bacteria	p__Actinomycetota	c__Coriobacteriia	o__Coriobacteriales	f__Coriobacteriaceae	g__Collinsella	s__Collinsella aerofaciens_X		138361	32	100	0.81	gtdb
GCA_019423005.1	d__Bacteria	p__Pseudomonadota	c__Gammaproteobacteria	o__Enterobacterales_A	f__Pasteurellaceae	g__Haemophilus_D	s__Haemophilus_D sp019423005		18302	133	54.55	0	gtdb
GCA_900539665.1	d__Bacteria	p__Pseudomonadota	c__Gammaproteobacteria	o__Enterobacterales_A	f__Succinivibrionaceae	g__WG-1	s__WG-1 sp900539665		27103	133	97.66	0	gtdb
GCA_934216185.1	d__Bacteria	p__Bacillota	c__Bacilli	o__Lactobacillales	f__Streptococcaceae	g__Streptococcus	s__Streptococcus sp934216185		10844	309	91.96	6.94	gtdb
GCA_902461085.1	d__Bacteria	p__Actinomycetota	c__Coriobacteriia	o__Coriobacteriales	f__Coriobacteriaceae	g__Collinsella	s__Collinsella sp902461085		25584	131	98.39	0.81	gtdb
GCA_902362275.1	d__Bacteria	p__Actinomycetota	c__Coriobacteriia	o__Coriobacteriales	f__Coriobacteriaceae	g__Collinsella	s__Collinsella sp902362275		71741	62	100	0.81	gtdb
GCF_021531655.1	d__Bacteria	p__Bacteroidota	c__Bacteroidia	o__Bacteroidales	f__Bacteroidaceae	g__Prevotella	s__Prevotella sp900544495		62345	143	99.07	6.11	gtdb
GCA_000436075.1	d__Bacteria	p__Actinomycetota	c__Coriobacteriia	o__Coriobacteriales	f__Eggerthellaceae	g__Anaerotardibacter	s__Anaerotardibacter sp000436075		12471	282	98.12	0.2	gtdb
GCA_900549215.1	d__Bacteria	p__Actinomycetota	c__Coriobacteriia	o__Coriobacteriales	f__Coriobacteriaceae	g__Collinsella	s__Collinsella sp900549215		10436	248	90.92	1.61	gtdb
GCA_902388705.1	d__Bacteria	p__Bacteroidota	c__Bacteroidia	o__Bacteroidales	f__Rikenellaceae	g__Alistipes	s__Alistipes sp902388705		49097	128	97.84	0.48	gtdb
GCA_900095875.1	d__Bacteria	p__Bacillota_C	c__Negativicutes	o__Veillonellales	f__Megasphaeraceae	g__Caecibacter	s__Caecibacter massiliensis		1953381	3	100	0	gtdb
GCA_900550355.1	d__Bacteria	p__Actinomycetota	c__Coriobacteriia	o__Coriobacteriales	f__Coriobacteriaceae	g__Collinsella	s__Collinsella sp900550355		11956	213	88.71	1.84	gtdb
GCA_018372555.1	d__Bacteria	p__Bacillota_A	c__Clostridia	o__Clostridiales	f__Clostridiaceae	g__Clostridium	s__Clostridium sp018372555		11361	599	91.54	1.22	gtdb
GCA_913775425.1	d__Bacteria	p__Bacillota	c__Bacilli	o__Lactobacillales	f__Enterococcaceae	g__Enterococcus_G	s__Enterococcus_G sp913775425		39016	90	96.69	1.21	gtdb
GCA_902796245.1	d__Bacteria	p__Bacillota_A	c__Clostridia	o__Oscillospirales	f__Oscillospiraceae	g__CAG-170	s__CAG-170 sp902796245		10115	256	80.85	3.13	gtdb
GCA_934643145.1	d__Bacteria	p__Actinomycetota	c__Coriobacteriia	o__Coriobacteriales	f__Coriobacteriaceae	g__Collinsella	s__Collinsella sp934643145		68224	56	91.13	0.81	gtdb
GCA_900555125.1	d__Bacteria	p__Bacillota_A	c__Clostridia	o__Christensenellales	f__Pumilibacteraceae	g__UMGS1795	s__UMGS1795 sp900555125		6407	280	73.56	2.13	gtdb
GCA_934660915.1	d__Bacteria	p__Actinomycetota	c__Coriobacteriia	o__Coriobacteriales	f__Atopobiaceae	g__Paratractidigestivibacter	s__Paratractidigestivibacter sp934660915		221879	21	100	0	gtdb
GCA_900550745.1	d__Bacteria	p__Desulfobacterota	c__Desulfovibrionia	o__Desulfovibrionales	f__Desulfovibrionaceae	g__Bilophila	s__Bilophila sp900550745		6267	425	78.43	0	gtdb
GCF_015553355.1	d__Bacteria	p__Actinomycetota	c__Coriobacteriia	o__Coriobacteriales	f__Coriobacteriaceae	g__Collinsella	s__Collinsella aerofaciens_V		42690	79	100	1.61	gtdb
GCA_900544865.1	d__Bacteria	p__Actinomycetota	c__Coriobacteriia	o__Coriobacteriales	f__Coriobacteriaceae	g__Collinsella	s__Collinsella sp900544865		49424	64	99.19	1.61	gtdb
GCF_000159995.1	d__Bacteria	p__Bacteroidota	c__Bacteroidia	o__Bacteroidales	f__Bacteroidaceae	g__Alloprevotella	s__Alloprevotella tannerae		314754	34	98.5	0	gtdb
GCF_003479405.1	d__Bacteria	p__Bacillota_A	c__Clostridia	o__Lachnospirales	f__Lachnospiraceae	g__Eubacterium_G	s__Eubacterium_G sp000432355		187385	44	99.33	0.67	gtdb
GCA_900554645.1	d__Bacteria	p__Actinomycetota	c__Coriobacteriia	o__Coriobacteriales	f__Coriobacteriaceae	g__Collinsella	s__Collinsella sp900554645		55000	28	65.32	0.07	gtdb
GCA_900554975.1	d__Bacteria	p__Bacillota_A	c__Clostridia	o__Oscillospirales	f__Ruminococcaceae	g__UBA1394	s__UBA1394 sp900554975		5234	333	70.63	1.34	gtdb
GCF_000722775.1	d__Bacteria	p__Bacillota	c__Bacilli	o__Lactobacillales	f__Streptococcaceae	g__Streptococcus	s__Streptococcus mitis_AV		195154	15	99.64	0.3	gtdb
GCA_900770445.1	d__Bacteria	p__Bacillota_A	c__Clostridia	o__Lachnospirales	f__Lachnospiraceae	g__Oribacterium	s__Oribacterium sp900770445		36464	97	94.28	1.27	gtdb
GCF_019929185.1	d__Bacteria	p__Bacillota	c__Bacilli	o__Lactobacillales	f__Streptococcaceae	g__Streptococcus	s__Streptococcus parasanguinis_O		166730	35	100	0.07	gtdb
GCA_900762325.1	d__Bacteria	p__Actinomycetota	c__Coriobacteriia	o__Coriobacteriales	f__Coriobacteriaceae	g__Collinsella	s__Collinsella sp900762325		90874	54	94.35	1.61	gtdb
GCA_902362435.1	d__Bacteria	p__Bacillota_A	c__Clostridia	o__Peptostreptococcales	f__Anaerovoracaceae	g__Lentihominibacter	s__Lentihominibacter sp900066305		135012	35	98.58	2.13	gtdb
GCF_000621645.1	d__Bacteria	p__Pseudomonadota	c__Gammaproteobacteria	o__Enterobacterales_A	f__Vibrionaceae	g__Vibrio	s__Vibrio cholerae		168747	70	100	0.03	gtdb
GCF_903645285.1	d__Bacteria	p__Bacillota	c__Bacilli	o__Lactobacillales	f__Streptococcaceae	g__Streptococcus	s__Streptococcus sp903645285		516480	5	99.82	0.2	gtdb
GCA_934424575.1	d__Bacteria	p__Bacillota_A	c__Clostridia	o__Lachnospirales	f__Lachnospiraceae	g__Blautia_A	s__Blautia_A sp934424575		61862	78	95.11	0.06	gtdb
GCF_900636475.1	d__Bacteria	p__Bacillota	c__Bacilli	o__Lactobacillales	f__Streptococcaceae	g__Streptococcus	s__Streptococcus anginosus		1953654	1	100	0	gtdb
GCA_900543395.1	d__Bacteria	p__Bacillota_A	c__Clostridia	o__Oscillospirales	f__Acutalibacteraceae	g__UBA1081	s__UBA1081 sp900543395		47499	78	93.06	0	gtdb
GCA_905369855.1	d__Bacteria	p__Bacillota	c__Bacilli	o__Lactobacillales	f__Streptococcaceae	g__Streptococcus	s__Streptococcus oralis_BN		9444	220	89.24	1.16	gtdb
GCF_000158275.2	d__Bacteria	p__Fusobacteriota	c__Fusobacteriia	o__Fusobacteriales	f__Fusobacteriaceae	g__Fusobacterium	s__Fusobacterium animalis		2507720	2	100	0	gtdb
GCA_900549355.1	d__Bacteria	p__Actinomycetota	c__Coriobacteriia	o__Coriobacteriales	f__Coriobacteriaceae	g__Collinsella	s__Collinsella sp900549355		12213	206	88.31	1.19	gtdb
GCF_000420345.1	d__Bacteria	p__Bacillota	c__Bacilli	o__Erysipelotrichales	f__Erysipelotrichaceae	g__Faecalicoccus	s__Faecalicoccus pleomorphus		78740	47	98.11	4.85	gtdb
GCF_000010185.1	d__Bacteria	p__Bacillota_A	c__Clostridia	o__Tissierellales	f__Peptoniphilaceae	g__Finegoldia	s__Finegoldia magna_H		1797577	2	99.39	0	gtdb
GCF_015667935.1	d__Bacteria	p__Bacillota_A	c__Clostridia	o__Peptostreptococcales	f__Peptostreptococcaceae	g__Intestinibacter	s__Intestinibacter sp900540355		16827	277	99.3	0.7	gtdb
GCA_900551815.1	d__Bacteria	p__Actinomycetota	c__Coriobacteriia	o__Coriobacteriales	f__Coriobacteriaceae	g__Collinsella	s__Collinsella sp900551815		32093	117	95.03	3.94	gtdb
GCA_905214375.1	d__Bacteria	p__Pseudomonadota	c__Gammaproteobacteria	o__Enterobacterales_A	f__Pasteurellaceae	g__Haemophilus_D	s__Haemophilus_D sp905214375		63547	53	87.07	0.19	gtdb
GCF_014931275.1	d__Bacteria	p__Pseudomonadota	c__Gammaproteobacteria	o__Enterobacterales_A	f__Pasteurellaceae	g__Haemophilus_D	s__Haemophilus_D sp900755445		2018144	1	99.89	0.3	gtdb
GCA_000434055.1	d__Bacteria	p__Bacillota_A	c__Clostridia	o__Oscillospirales	f__Acutalibacteraceae	g__CAG-488	s__CAG-488 sp000434055		45525	109	96.6	0	gtdb
GCF_000507765.1	d__Bacteria	p__Bacillota	c__Bacilli	o__Lactobacillales	f__Streptococcaceae	g__Streptococcus	s__Streptococcus parasanguinis_J		447888	12	100	0.07	gtdb
GCA_900546255.1	d__Bacteria	p__Bacillota_A	c__Clostridia	o__Oscillospirales	f__Oscillospiraceae	g__Evtepia	s__Evtepia excrementipullorum		29980	131	95.7	1.34	gtdb
GCA_900544285.1	d__Bacteria	p__Bacillota_A	c__Clostridia	o__Oscillospirales	f__CAG-272	g__CAG-841	s__CAG-841 sp900544285		93042	31	91.83	0	gtdb
GCA_900551015.1	d__Bacteria	p__Actinomycetota	c__Coriobacteriia	o__Coriobacteriales	f__Coriobacteriaceae	g__Collinsella	s__Collinsella sp900551015		24115	137	94.01	3.23	gtdb
GCF_018785265.1	d__Bacteria	p__Actinomycetota	c__Coriobacteriia	o__Coriobacteriales	f__Coriobacteriaceae	g__Collinsella	s__Collinsella aerofaciens_AI		88637	81	100	0.81	gtdb
GCA_900762015.1	d__Bacteria	p__Actinomycetota	c__Coriobacteriia	o__Coriobacteriales	f__Coriobacteriaceae	g__Collinsella	s__Collinsella sp900762015		26476	115	91.94	0.81	gtdb
GCF_900101835.1	d__Bacteria	p__Bacillota_B	c__Peptococcia	o__Peptococcales	f__Peptococcaceae	g__Peptococcus	s__Peptococcus niger		187917	32	80.54	0.68	gtdb
GCF_021531355.1	d__Bacteria	p__Bacteroidota	c__Bacteroidia	o__Bacteroidales	f__Bacteroidaceae	g__Prevotella	s__Prevotella sp900552515		38647	260	99.07	0	gtdb
GCA_900545535.1	d__Bacteria	p__Bacillota_C	c__Negativicutes	o__Acidaminococcales	f__Acidaminococcaceae	g__Phascolarctobacterium	s__Phascolarctobacterium sp900545535		104127	34	98.78	1.7	gtdb
GCA_019414665.1	d__Bacteria	p__Bacteroidota	c__Bacteroidia	o__Bacteroidales	f__Bacteroidaceae	g__Phocaeicola	s__Phocaeicola sp019414665		59615	106	60.34	0	gtdb
GCF_022133705.1	d__Bacteria	p__Actinomycetota	c__Actinomycetia	o__Actinomycetales	f__Actinomycetaceae	g__Varibaculum	s__Varibaculum cambriense_A		126808	73	99.05	0.71	gtdb
GCA_900546415.1	d__Bacteria	p__Bacillota_A	c__Clostridia	o__Oscillospirales	f__Oscillospiraceae	g__Faecousia	s__Faecousia sp900546415		26656	95	91.95	0.67	gtdb
GCA_025149785.1	d__Bacteria	p__Bacillota_A	c__Clostridia	o__Lachnospirales	f__Lachnospiraceae	g__Bariatricus	s__Bariatricus comes		3373066	1	99.42	0	gtdb
GCA_934149245.1	d__Bacteria	p__Bacillota	c__Bacilli	o__RF39	f__UBA660	g__RUG11198	s__RUG11198 sp934149245		32306	92	92.13	0.56	gtdb
GCA_900756945.1	d__Bacteria	p__Actinomycetota	c__Coriobacteriia	o__Coriobacteriales	f__Coriobacteriaceae	g__Collinsella	s__Collinsella sp900756945		30728	102	89.98	0.81	gtdb
GCA_900758375.1	d__Bacteria	p__Actinomycetota	c__Coriobacteriia	o__Coriobacteriales	f__Coriobacteriaceae	g__Collinsella	s__Collinsella sp900758375		53537	64	89.52	0.81	gtdb
GCF_016127015.1	d__Bacteria	p__Actinomycetota	c__Actinomycetia	o__Mycobacteriales	f__Mycobacteriaceae	g__Corynebacterium	s__Corynebacterium aurimucosum_E		2408591	1	99.78	0	gtdb
GCA_905214465.1	d__Bacteria	p__Actinomycetota	c__Coriobacteriia	o__Coriobacteriales	f__Coriobacteriaceae	g__Collinsella	s__Collinsella sp905214465		74999	56	93.82	1.61	gtdb
GCF_016647575.1	d__Bacteria	p__Pseudomonadota	c__Gammaproteobacteria	o__Enterobacterales	f__Enterobacteriaceae	g__Proteus	s__Proteus mirabilis_B		4141308	1	100	0	gtdb
GCF_013300725.1	d__Bacteria	p__Bacillota_A	c__Clostridia	o__Lachnospirales	f__Lachnospiraceae	g__Bariatricus	s__Bariatricus comes_A		96667	130	99.42	0.49	gtdb
GCA_000438415.1	d__Bacteria	p__Bacillota	c__Bacilli	o__RF39	f__UBA660	g__CAG-628	s__CAG-628 sp000438415		39243	56	91.57	1.12	gtdb
GCF_000148525.1	d__Bacteria	p__Bacillota	c__Bacilli	o__Lactobacillales	f__Streptococcaceae	g__Streptococcus	s__Streptococcus mitis_H		97266	35	99.82	0.24	gtdb
GCA_905221455.1	d__Bacteria	p__Bacillota	c__Bacilli	o__Lactobacillales	f__Streptococcaceae	g__Streptococcus	s__Streptococcus sp905221455		162400	105	99.82	0.65	gtdb
GCF_003461245.1	d__Bacteria	p__Bacillota_A	c__Clostridia	o__Lachnospirales	f__Lachnospiraceae	g__Blautia_A	s__Blautia_A sp000436615		85278	144	99.37	0	gtdb
GCA_900544585.1	d__Bacteria	p__Bacillota	c__Bacilli	o__Mycoplasmatales	f__Mycoplasmoidaceae	g__Ureaplasma	s__Ureaplasma sp900544585		404062	4	97.31	1.15	gtdb
GCF_023656745.1	d__Bacteria	p__Actinomycetota	c__Coriobacteriia	o__Coriobacteriales	f__Coriobacteriaceae	g__Collinsella	s__Collinsella sp023656745		121042	46	100	0.81	gtdb
GCF_901472495.1	d__Bacteria	p__Pseudomonadota	c__Gammaproteobacteria	o__Enterobacterales	f__Enterobacteriaceae	g__Yersinia	s__Yersinia enterocolitica		4558409	1	99.63	0	gtdb
GCA_934122035.1	d__Bacteria	p__Bacillota_A	c__Clostridia	o__TANB77	f__CAG-508	g__CAG-245	s__CAG-245 sp934122035		36548	61	69.12	1.36	gtdb
GCA_934533135.1	d__Bacteria	p__Bacillota_A	c__Clostridia	o__Oscillospirales	f__Ruminococcaceae	g__Faecalibacterium	s__Faecalibacterium sp934533135		70350	44	93.27	0	gtdb
GCA_000431015.1	d__Bacteria	p__Bacteroidota	c__Bacteroidia	o__Bacteroidales	f__UBA932	g__Cryptobacteroides	s__Cryptobacteroides sp000431015		27883	171	93.81	1.19	gtdb
GCA_934309415.1	d__Bacteria	p__Bacillota_A	c__Clostridia	o__Lachnospirales	f__Lachnospiraceae	g__Mediterraneibacter	s__Mediterraneibacter sp934309415		86091	75	92.69	0	gtdb
GCA_934096535.1	d__Bacteria	p__Bacillota	c__Bacilli	o__RF39	f__UBA660	g__CAG-605	s__CAG-605 sp934096535		28985	74	87.64	1.28	gtdb
GCF_001679045.1	d__Bacteria	p__Pseudomonadota	c__Gammaproteobacteria	o__Enterobacterales_A	f__Pasteurellaceae	g__Haemophilus	s__Haemophilus haemolyticus		216353	21	99.66	0	gtdb
GCA_934141445.1	d__Bacteria	p__Bacillota_A	c__Clostridia	o__TANB77	f__CAG-508	g__Scatovivens	s__Scatovivens sp934141445		51047	59	77.88	1.36	gtdb
GCA_019423565.1	d__Bacteria	p__Bacillota	c__Bacilli	o__RF39	f__UBA660	g__CAG-433	s__CAG-433 sp019423565		118665	19	88.2	3.37	gtdb
GCF_003469205.1	d__Bacteria	p__Actinomycetota	c__Coriobacteriia	o__Coriobacteriales	f__Coriobacteriaceae	g__Collinsella	s__Collinsella sp003469205		153518	42	100	0.81	gtdb
GCA_018228645.1	d__Bacteria	p__Bacillota_A	c__Clostridia	o__Lachnospirales	f__Lachnospiraceae	g__Choladocola	s__Choladocola sp003481535		1675846	5	99.37	0	gtdb
GCA_018378775.1	d__Bacteria	p__Actinomycetota	c__Coriobacteriia	o__Coriobacteriales	f__Coriobacteriaceae	g__Collinsella	s__Collinsella sp018378775		28425	224	98.99	1.81	gtdb
GCA_900551615.1	d__Bacteria	p__Bacillota_A	c__Clostridia	o__TANB77	f__CAG-508	g__CAG-269	s__CAG-269 sp900551615		45128	72	81.88	1.17	gtdb
GCA_900548815.1	d__Bacteria	p__Actinomycetota	c__Coriobacteriia	o__Coriobacteriales	f__Coriobacteriaceae	g__Collinsella	s__Collinsella sp900548815		29688	107	97.98	2.82	gtdb
GCA_905215465.1	d__Bacteria	p__Actinomycetota	c__Coriobacteriia	o__Coriobacteriales	f__Atopobiaceae	g__Paratractidigestivibacter	s__Paratractidigestivibacter sp905215465		39963	82	97.98	2.15	gtdb
GCA_000434735.1	d__Bacteria	p__Bacteroidota	c__Bacteroidia	o__Bacteroidales	f__Bacteroidaceae	g__Phocaeicola	s__Phocaeicola sp000434735		31995	194	97.94	0.56	gtdb
GCA_934643435.1	d__Bacteria	p__Actinomycetota	c__Coriobacteriia	o__Coriobacteriales	f__Coriobacteriaceae	g__Collinsella	s__Collinsella sp934643435		5355	431	83.89	4.15	gtdb
GCA_900557275.1	d__Bacteria	p__Bacillota_A	c__Clostridia	o__Lachnospirales	f__Lachnospiraceae	g__Eubacterium_I	s__Eubacterium_I sp900557275		125469	20	61.4	1.75	gtdb
GCA_003478355.1	d__Bacteria	p__Bacillota_A	c__Clostridia	o__Lachnospirales	f__Lachnospiraceae	g__UBA3402	s__UBA3402 sp003478355		67397	163	97.31	0.63	gtdb
GCA_900543845.1	d__Bacteria	p__Actinomycetota	c__Coriobacteriia	o__Coriobacteriales	f__Coriobacteriaceae	g__Collinsella	s__Collinsella sp900543845		25584	123	96.43	0.81	gtdb
GCA_003533505.1	d__Bacteria	p__Bacillota_A	c__Clostridia	o__Christensenellales	f__Pumilibacteraceae	g__UBA10677	s__UBA10677 sp003533505		73915	37	57.49	0	gtdb
GCF_001073155.1	d__Bacteria	p__Bacillota	c__Bacilli	o__Lactobacillales	f__Streptococcaceae	g__Streptococcus	s__Streptococcus parasanguinis_D		60174	61	99.66	0.8	gtdb
GCF_001281025.1	d__Bacteria	p__Bacillota	c__Bacilli	o__Lactobacillales	f__Streptococcaceae	g__Streptococcus	s__Streptococcus mitis_AK		1906344	1	99.42	0.6	gtdb
GCA_934668345.1	d__Bacteria	p__Actinomycetota	c__Coriobacteriia	o__Coriobacteriales	f__Coriobacteriaceae	g__Collinsella	s__Collinsella sp934668345		217740	11	68.55	0	gtdb
GCF_003461625.1	d__Bacteria	p__Bacillota_A	c__Clostridia	o__Lachnospirales	f__Lachnospiraceae	g__Coprococcus	s__Coprococcus sp900066115		361298	24	99.33	0	gtdb
GCA_018982785.1	d__Bacteria	p__Bacillota	c__Bacilli	o__Lactobacillales	f__Enterococcaceae	g__Enterococcus_D	s__Enterococcus_D innesii		598782	14	98.1	0.75	gtdb
GCF_019131995.1	d__Bacteria	p__Actinomycetota	c__Coriobacteriia	o__Coriobacteriales	f__Coriobacteriaceae	g__Collinsella	s__Collinsella aerofaciens_S		72960	90	100	1.61	gtdb
GCF_008364625.1	d__Bacteria	p__Pseudomonadota	c__Gammaproteobacteria	o__Enterobacterales	f__Enterobacteriaceae	g__Enterobacter	s__Enterobacter dykesii		312590	63	99.97	0.06	gtdb
GCA_004556155.1	d__Bacteria	p__Bacillota_A	c__Clostridia	o__Christensenellales	f__CAG-74	g__SFMI01	s__SFMI01 sp004556155		72378	62	96.37	1.08	gtdb
GCA_905214905.1	d__Bacteria	p__Actinomycetota	c__Coriobacteriia	o__Coriobacteriales	f__Coriobacteriaceae	g__Collinsella	s__Collinsella sp905214905		24833	129	96.77	0.9	gtdb
GCF_004793765.1	d__Bacteria	p__Bacteroidota	c__Bacteroidia	o__Bacteroidales	f__Tannerellaceae	g__Parabacteroides	s__Parabacteroides distasonis_A		62163	177	99.42	0.58	gtdb
GCA_900767875.1	d__Bacteria	p__Pseudomonadota	c__Gammaproteobacteria	o__Burkholderiales	f__Burkholderiaceae_A	g__Duodenibacillus	s__Duodenibacillus sp900767875		41949	90	95.62	0.62	gtdb
GCF_005601135.1	d__Bacteria	p__Bacillota_A	c__Clostridia	o__Oscillospirales	f__Acutalibacteraceae	g__Ruminococcus_E	s__Ruminococcus_E bovis		2440231	1	98.66	2.35	gtdb
GCA_900542965.1	d__Bacteria	p__Actinomycetota	c__Coriobacteriia	o__Coriobacteriales	f__Coriobacteriaceae	g__Collinsella	s__Collinsella sp900542965		32953	109	97.58	0.81	gtdb
GCA_900540385.1	d__Bacteria	p__Bacillota	c__Bacilli	o__RFN20	f__CAG-826	g__UBA4951	s__UBA4951 sp900540385		73006	39	96.63	0	gtdb
GCF_900637705.1	d__Bacteria	p__Fusobacteriota	c__Fusobacteriia	o__Fusobacteriales	f__Fusobacteriaceae	g__Fusobacterium_A	s__Fusobacterium_A varium		3302398	1	98.31	2.25	gtdb
GCA_905188195.1	d__Bacteria	p__Bacillota	c__Bacilli	o__Lactobacillales	f__Streptococcaceae	g__Streptococcus	s__Streptococcus parasanguinis_P		109459	27	96.78	0.03	gtdb
GCF_003471585.1	d__Bacteria	p__Actinomycetota	c__Coriobacteriia	o__Coriobacteriales	f__Coriobacteriaceae	g__Collinsella	s__Collinsella sp003471585		85036	54	100	0.81	gtdb
GCA_002211745.1	d__Bacteria	p__Pseudomonadota	c__Gammaproteobacteria	o__Enterobacterales	f__Enterobacteriaceae	g__Kluyvera	s__Kluyvera georgiana_A		5006140	1	92.22	0.93	gtdb
GCA_900540595.1	d__Bacteria	p__Bacillota_A	c__Clostridia	o__Oscillospirales	f__Ruminococcaceae	g__Gemmiger	s__Gemmiger sp900540595		66581	71	96.29	0	gtdb
GCF_900199545.1	d__Bacteria	p__Actinomycetota	c__Coriobacteriia	o__Coriobacteriales	f__Eggerthellaceae	g__Raoultibacter	s__Raoultibacter massiliensis		240413	35	100	0	gtdb
GCA_902364645.1	d__Bacteria	p__Actinomycetota	c__Coriobacteriia	o__Coriobacteriales	f__Coriobacteriaceae	g__Collinsella	s__Collinsella sp902364645		112158	64	100	0.81	gtdb
GCA_900548515.1	d__Bacteria	p__Actinomycetota	c__Coriobacteriia	o__Coriobacteriales	f__Coriobacteriaceae	g__Collinsella	s__Collinsella sp900548515		19819	155	93.55	1.88	gtdb
GCF_000368925.1	d__Bacteria	p__Pseudomonadota	c__Gammaproteobacteria	o__Pseudomonadales	f__Moraxellaceae	g__Acinetobacter	s__Acinetobacter bereziniae		244009	52	99.93	2.16	gtdb
GCA_900446925.1	d__Bacteria	p__Pseudomonadota	c__Gammaproteobacteria	o__Enterobacterales	f__Enterobacteriaceae	g__Citrobacter_B	s__Citrobacter_B koseri		635403	11	91.45	0.4	gtdb
GCF_000257845.1	d__Bacteria	p__Bacillota	c__Bacilli	o__Lactobacillales	f__Streptococcaceae	g__Streptococcus	s__Streptococcus oralis_W		252297	20	99.77	0.2	gtdb
GCF_901875555.1	d__Bacteria	p__Bacillota	c__Bacilli	o__Lactobacillales	f__Streptococcaceae	g__Streptococcus	s__Streptococcus parasanguinis_H		125604	37	100	0.52	gtdb
GCA_900556575.1	d__Bacteria	p__Bacillota_A	c__Clostridia	o__UBA1381	f__UBA1381	g__UBA4716	s__UBA4716 sp900556575		6183	394	59.49	0.67	gtdb
GCA_003044645.1	d__Bacteria	p__Pseudomonadota	c__Gammaproteobacteria	o__Burkholderiales	f__Neisseriaceae	g__Neisseria	s__Neisseria subflava_B		217621	23	99.92	0.34	gtdb
GCA_900547295.1	d__Bacteria	p__Bacillota_A	c__Clostridia	o__Peptostreptococcales	f__Anaerovoracaceae	g__UMGS973	s__UMGS973 sp900547295		30237	113	95.77	1.77	gtdb
GCA_025149915.1	d__Bacteria	p__Bacillota_A	c__Clostridia	o__Lachnospirales	f__Lachnospiraceae	g__Coprococcus	s__Coprococcus eutactus		3112919	1	99.33	0	gtdb
GCA_019117185.1	d__Bacteria	p__Bacillota	c__Bacilli	o__Lactobacillales	f__Lactobacillaceae	g__Limosilactobacillus	s__Limosilactobacillus intestinipullorum		35499	74	96.81	1.63	gtdb
GCF_001729745.1	d__Bacteria	p__Pseudomonadota	c__Gammaproteobacteria	o__Enterobacterales	f__Enterobacteriaceae	g__Enterobacter	s__Enterobacter hormaechei_A		4546962	2	99.97	0.17	gtdb
GCF_009933255.1	d__Bacteria	p__Bacillota	c__Bacilli	o__Lactobacillales	f__Enterococcaceae	g__Enterococcus_C	s__Enterococcus_C diestrammenae_A		108526	55	99.25	0.5	gtdb
GCA_934162325.1	d__Bacteria	p__Bacillota	c__Bacilli	o__RF39	f__UBA660	g__CAG-302	s__CAG-302 sp934162325		25363	66	94.18	0	gtdb
GCF_000163295.1	d__Bacteria	p__Bacillota_A	c__Clostridia	o__Tissierellales	f__Peptoniphilaceae	g__Anaerococcus	s__Anaerococcus vaginalis		112543	28	99.39	0.61	gtdb
GCA_900548145.1	d__Bacteria	p__Bacillota_A	c__Clostridia	o__Christensenellales	f__CAG-74	g__Limiplasma	s__Limiplasma sp900548145		40901	107	94.76	1.88	gtdb
GCA_934630815.1	d__Bacteria	p__Actinomycetota	c__Coriobacteriia	o__Coriobacteriales	f__Eggerthellaceae	g__Senegalimassilia	s__Senegalimassilia sp934630815		77443	37	90.32	0	gtdb
GCA_900768625.1	d__Bacteria	p__Bacteroidota	c__Bacteroidia	o__Bacteroidales	f__Bacteroidaceae	g__Alloprevotella	s__Alloprevotella sp900768625		12518	338	85.14	0.07	gtdb
GCF_019703545.1	d__Bacteria	p__Pseudomonadota	c__Gammaproteobacteria	o__Enterobacterales_A	f__Pasteurellaceae	g__Haemophilus	s__Haemophilus influenzae_E		1902536	1	99.67	0	gtdb
GCF_002959895.1	d__Bacteria	p__Bacillota_C	c__Negativicutes	o__Veillonellales	f__Veillonellaceae	g__Veillonella	s__Veillonella infantium		235046	15	100	0	gtdb
GCA_900550195.1	d__Bacteria	p__Actinomycetota	c__Coriobacteriia	o__Coriobacteriales	f__Coriobacteriaceae	g__Collinsella	s__Collinsella sp900550195		116141	26	83.87	0.81	gtdb
GCF_001808955.1	d__Bacteria	p__Actinomycetota	c__Actinomycetia	o__Actinomycetales	f__Micrococcaceae	g__Rothia	s__Rothia sp001808955		79323	62	99.33	0	gtdb
GCF_000493015.1	d__Bacteria	p__Pseudomonadota	c__Gammaproteobacteria	o__Enterobacterales	f__Enterobacteriaceae	g__Enterobacter	s__Enterobacter sp000493015		1822932	4	99.07	0.69	gtdb
GCF_018785245.1	d__Bacteria	p__Actinomycetota	c__Coriobacteriia	o__Coriobacteriales	f__Coriobacteriaceae	g__Collinsella	s__Collinsella aerofaciens_AD		66339	81	100	1.61	gtdb
GCA_900552715.1	d__Bacteria	p__Bacillota_C	c__Negativicutes	o__Veillonellales	f__Veillonellaceae	g__Veillonella	s__Veillonella sp900552715		15993	151	90.7	3.71	gtdb
GCA_934202215.1	d__Bacteria	p__Bacillota_C	c__Negativicutes	o__Veillonellales	f__Veillonellaceae	g__Veillonella	s__Veillonella sp934202215		24444	123	85.26	4.79	gtdb
GCA_025146925.1	d__Bacteria	p__Bacillota_A	c__Clostridia	o__Lachnospirales	f__Lachnospiraceae	g__Bacteroides_F	s__Bacteroides_F pectinophilus		3078488	1	99.33	0	gtdb
GCA_934662565.1	d__Bacteria	p__Elusimicrobiota	c__Elusimicrobia	o__Elusimicrobiales	f__Elusimicrobiaceae	g__UBA1436	s__UBA1436 sp934662565		315939	8	96.63	0	gtdb
GCA_018381235.1	d__Bacteria	p__Actinomycetota	c__Coriobacteriia	o__Coriobacteriales	f__Coriobacteriaceae	g__Collinsella	s__Collinsella sp018381235		130374	22	100	0.81	gtdb
GCA_900546085.1	d__Bacteria	p__Actinomycetota	c__Coriobacteriia	o__Coriobacteriales	f__Coriobacteriaceae	g__Collinsella	s__Collinsella sp900546085		15438	156	91.13	0.4	gtdb
GCA_905212195.1	d__Bacteria	p__Bacillota_A	c__Clostridia	o__Lachnospirales	f__Anaerotignaceae	g__Anaerotignum	s__Anaerotignum sp905212195		26258	118	93.62	1.79	gtdb
GCF_003363715.1	d__Bacteria	p__Bacteroidota	c__Bacteroidia	o__Bacteroidales	f__Tannerellaceae	g__Parabacteroides	s__Parabacteroides acidifaciens		63244	161	99.62	0.19	gtdb
GCA_018382295.1	d__Bacteria	p__Actinomycetota	c__Coriobacteriia	o__Coriobacteriales	f__Coriobacteriaceae	g__Collinsella	s__Collinsella sp018382295		54699	78	100	0.81	gtdb
GCF_001070715.1	d__Bacteria	p__Bacillota	c__Bacilli	o__Lactobacillales	f__Streptococcaceae	g__Streptococcus	s__Streptococcus pseudopneumoniae_H		28377	150	99.82	0.2	gtdb
GCA_900539735.1	d__Bacteria	p__Actinomycetota	c__Coriobacteriia	o__Coriobacteriales	f__Coriobacteriaceae	g__Collinsella	s__Collinsella sp900539735		46857	51	97.58	0	gtdb
GCA_905213875.1	d__Bacteria	p__Bacillota_A	c__Clostridia	o__TANB77	f__CAG-508	g__CAG-269	s__CAG-269 sp905213875		49541	45	75.94	0.84	gtdb
GCF_000163935.1	d__Bacteria	p__Fusobacteriota	c__Fusobacteriia	o__Fusobacteriales	f__Fusobacteriaceae	g__Fusobacterium	s__Fusobacterium periodonticum_B		96412	80	100	0	gtdb
GCA_934437695.1	d__Bacteria	p__Bacillota_A	c__Clostridia	o__Lachnospirales	f__Lachnospiraceae	g__Blautia_A	s__Blautia_A sp934437695		10271	177	66.3	0	gtdb
GCA_000434835.1	d__Bacteria	p__Bacillota	c__Bacilli	o__RF39	f__UBA660	g__Aphodocola	s__Aphodocola sp000434835		35117	76	92.42	0	gtdb
GCF_000311745.1	d__Bacteria	p__Bacillota_A	c__Clostridia	o__Tissierellales	f__Peptoniphilaceae	g__Anaerococcus	s__Anaerococcus obesiensis		157527	32	98.59	0.61	gtdb
GCA_934553285.1	d__Bacteria	p__Bacillota_A	c__Clostridia	o__Oscillospirales	f__Ruminococcaceae	g__Faecalibacterium	s__Faecalibacterium sp934553285		18704	159	91.7	0.68	gtdb
GCA_905209685.1	d__Bacteria	p__Bacillota_C	c__Negativicutes	o__Veillonellales	f__Veillonellaceae	g__Veillonella	s__Veillonella sp905209685		12984	200	92.94	1.42	gtdb
GCA_900541125.1	d__Bacteria	p__Actinomycetota	c__Coriobacteriia	o__Coriobacteriales	f__Coriobacteriaceae	g__Collinsella	s__Collinsella sp900541125		75924	45	100	0.81	gtdb
GCA_019118705.1	d__Bacteria	p__Bacillota	c__Bacilli	o__Erysipelotrichales	f__Erysipelotrichaceae	g__Merdibacter	s__Merdibacter merdigallinarum		15151	234	93.96	0.94	gtdb
GCA_934597345.1	d__Bacteria	p__Bacillota_A	c__Clostridia	o__Oscillospirales	f__Oscillospiraceae	g__Vescimonas	s__Vescimonas sp934597345		53891	72	88.23	0.67	gtdb
GCA_900544725.1	d__Bacteria	p__Actinomycetota	c__Coriobacteriia	o__Coriobacteriales	f__Coriobacteriaceae	g__Collinsella	s__Collinsella sp900544725		36980	94	99.35	1.61	gtdb
GCA_900550005.1	d__Bacteria	p__Bacillota	c__Bacilli	o__Erysipelotrichales	f__Coprobacillaceae	g__Beduini	s__Beduini sp900550005		8301	299	82.83	0.47	gtdb
GCF_000148585.2	d__Bacteria	p__Bacillota	c__Bacilli	o__Lactobacillales	f__Streptococcaceae	g__Streptococcus	s__Streptococcus mitis		1868883	1	99.38	0.2	gtdb
GCA_902834965.1	d__Bacteria	p__Bacillota_C	c__Negativicutes	o__Veillonellales	f__Veillonellaceae	g__Veillonella	s__Veillonella sp902834965		7940	231	51.18	1.72	gtdb
GCF_014647335.1	d__Bacteria	p__Bacteroidota	c__Bacteroidia	o__Bacteroidales	f__Marinifilaceae	g__Butyricimonas	s__Butyricimonas faecihominis		397828	34	99.46	0.54	gtdb
GCA_018372875.1	d__Bacteria	p__Bacillota_A	c__Clostridia	o__Clostridiales	f__Clostridiaceae	g__Clostridium	s__Clostridium sp018372875		65813	111	99.19	0	gtdb
GCA_019414515.1	d__Bacteria	p__Actinomycetota	c__Coriobacteriia	o__Coriobacteriales	f__Coriobacteriaceae	g__Collinsella	s__Collinsella sp019414515		59224	48	100	1.61	gtdb
GCA_902388545.1	d__Bacteria	p__Actinomycetota	c__Coriobacteriia	o__Coriobacteriales	f__Coriobacteriaceae	g__Collinsella	s__Collinsella sp902388545		9375	280	94.35	1.61	gtdb
GCF_015557435.1	d__Bacteria	p__Actinomycetota	c__Coriobacteriia	o__Coriobacteriales	f__Coriobacteriaceae	g__Collinsella	s__Collinsella aerofaciens_Z		41695	102	100	0.81	gtdb
GCA_900760705.1	d__Bacteria	p__Bacillota_A	c__Clostridia	o__Lachnospirales	f__Lachnospiraceae	g__Acetatifactor	s__Acetatifactor sp900760705		13469	350	92.93	3.58	gtdb
GCA_900758845.1	d__Bacteria	p__Actinomycetota	c__Coriobacteriia	o__Coriobacteriales	f__Coriobacteriaceae	g__Collinsella	s__Collinsella sp900758845		36436	85	99.19	0.81	gtdb
GCA_004557245.1	d__Bacteria	p__Bacillota_A	c__Clostridia	o__Christensenellales	f__CAG-138	g__SFEL01	s__SFEL01 sp004557245		85995	69	99.19	1.34	gtdb
GCF_008364555.1	d__Bacteria	p__Pseudomonadota	c__Gammaproteobacteria	o__Enterobacterales	f__Enterobacteriaceae	g__Enterobacter	s__Enterobacter vonholyi		339748	41	98.78	0.63	gtdb
GCF_024499055.1	d__Bacteria	p__Bacillota	c__Bacilli	o__Haloplasmatales	f__Turicibacteraceae	g__Turicibacter	s__Turicibacter bilis		2786784	1	91.6	2.39	gtdb
GCF_000222025.1	d__Bacteria	p__Pseudomonadota	c__Gammaproteobacteria	o__Enterobacterales_A	f__Pasteurellaceae	g__Haemophilus	s__Haemophilus haemolyticus_G		238571	22	99.66	5.97	gtdb
GCA_002437405.1	d__Bacteria	p__Verrucomicrobiota	c__Verrucomicrobiae	o__Opitutales	f__CAG-312	g__Merdousia	s__Merdousia sp002437405		18169	207	91.28	0	gtdb
GCA_000411415.1	d__Bacteria	p__Actinomycetota	c__Actinomycetia	o__Actinomycetales	f__Actinomycetaceae	g__Pauljensenia	s__Pauljensenia sp000411415		377615	14	100	0.47	gtdb
GCA_004554245.1	d__Bacteria	p__Bacillota_A	c__Clostridia	o__Lachnospirales	f__Lachnospiraceae	g__Oribacterium	s__Oribacterium sp004554245		73454	55	96.72	0	gtdb
GCF_000175615.1	d__Bacteria	p__Actinomycetota	c__Actinomycetia	o__Actinomycetales	f__Micrococcaceae	g__Rothia	s__Rothia mucilaginosa		172461	25	99.33	0	gtdb
GCF_003122485.1	d__Bacteria	p__Bacillota_A	c__Clostridia	o__Lachnospirales	f__Lachnospiraceae	g__Eubacterium_I	s__Eubacterium_I ramulus_A		24069	273	97.13	1.54	gtdb
GCF_018499505.1	d__Bacteria	p__Bacillota	c__Bacilli	o__Lactobacillales	f__Streptococcaceae	g__Streptococcus	s__Streptococcus parasanguinis_K		280703	20	93.56	1.02	gtdb
GCA_900541585.1	d__Bacteria	p__Bacteroidota	c__Bacteroidia	o__Bacteroidales	f__Rikenellaceae	g__Alistipes	s__Alistipes sp900541585		107669	45	97.12	0.37	gtdb
GCA_900757715.1	d__Bacteria	p__Bacillota_C	c__Negativicutes	o__Veillonellales	f__Veillonellaceae	g__Veillonella	s__Veillonella sp900757715		15631	326	96.24	1.53	gtdb
GCA_900554135.1	d__Bacteria	p__Actinomycetota	c__Coriobacteriia	o__Coriobacteriales	f__Coriobacteriaceae	g__Collinsella	s__Collinsella sp900554135		9697	246	75.9	1.61	gtdb
GCA_934359755.1	d__Bacteria	p__Bacillota_A	c__Clostridia	o__Lachnospirales	f__Lachnospiraceae	g__Agathobacter	s__Agathobacter sp934359755		97712	64	91.44	0.26	gtdb
GCA_900556055.1	d__Bacteria	p__Bacillota_A	c__Clostridia	o__Oscillospirales	f__Ruminococcaceae	g__UMGS1889	s__UMGS1889 sp900556055		9310	327	68.84	2.01	gtdb
GCA_900770335.1	d__Bacteria	p__Pseudomonadota	c__Gammaproteobacteria	o__Burkholderiales	f__Burkholderiaceae_A	g__Sutterella	s__Sutterella sp900770335		19640	179	91.3	0.78	gtdb
GCF_900637655.1	d__Bacteria	p__Bacteroidota	c__Bacteroidia	o__Bacteroidales	f__Bacteroidaceae	g__Prevotella	s__Prevotella oris		3168212	1	99.32	0.34	gtdb
GCA_934085565.1	d__Bacteria	p__Bacillota	c__Bacilli	o__RF39	f__UBA660	g__Ventrenecus	s__Ventrenecus sp934085565		209566	11	92.7	1.69	gtdb
GCF_003469185.1	d__Bacteria	p__Actinomycetota	c__Coriobacteriia	o__Coriobacteriales	f__Coriobacteriaceae	g__Collinsella	s__Collinsella sp003469185		233590	34	100	1.61	gtdb
GCA_934650095.1	d__Bacteria	p__Actinomycetota	c__Coriobacteriia	o__Coriobacteriales	f__Coriobacteriaceae	g__Collinsella	s__Collinsella sp934650095		40326	104	75	0.81	gtdb
GCA_900772565.1	d__Bacteria	p__Bacillota_A	c__Clostridia	o__Oscillospirales	f__Ruminococcaceae	g__Faecalibacterium	s__Faecalibacterium sp900772565		21179	233	96.19	0.62	gtdb
GCA_900557035.1	d__Bacteria	p__Bacteroidota	c__Bacteroidia	o__Bacteroidales	f__Bacteroidaceae	g__Prevotella	s__Prevotella sp900557035		26221	130	62.93	1.72	gtdb
GCA_900756925.1	d__Bacteria	p__Bacillota_A	c__Clostridia	o__Lachnospirales	f__Lachnospiraceae	g__Roseburia	s__Roseburia sp900756925		59583	58	62.86	0.48	gtdb
GCF_000466485.1	d__Bacteria	p__Bacillota_A	c__Clostridia	o__Lachnospirales	f__Lachnospiraceae	g__Clostridium_Q	s__Clostridium_Q symbiosum		23354	400	99.37	0	gtdb
GCA_000437395.1	d__Bacteria	p__Bacillota	c__Bacilli	o__RFN20	f__CAG-288	g__CAG-288	s__CAG-288 sp000437395		60623	47	98.5	0	gtdb
GCF_000296505.1	d__Bacteria	p__Actinomycetota	c__Actinomycetia	o__Actinomycetales	f__Actinomycetaceae	g__Pauljensenia	s__Pauljensenia turicensis		299630	10	100	0.47	gtdb
GCF_943193075.1	d__Bacteria	p__Bacillota	c__Bacilli	o__Lactobacillales	f__Streptococcaceae	g__Streptococcus	s__Streptococcus parasanguinis_E		85176	44	100	0.07	gtdb
GCA_004557855.1	d__Bacteria	p__Bacillota_A	c__Clostridia	o__Oscillospirales	f__Ruminococcaceae	g__Angelakisella	s__Angelakisella sp004557855		52448	41	88.37	0	gtdb
GCF_016901815.1	d__Bacteria	p__Bacillota_A	c__Clostridia	o__Oscillospirales	f__Ruminococcaceae	g__Avimicrobium	s__Avimicrobium caecorum		215070	66	94.63	0	gtdb
GCF_000963275.1	d__Bacteria	p__Bacillota	c__Bacilli	o__Lactobacillales	f__Streptococcaceae	g__Streptococcus	s__Streptococcus parasanguinis_B		2007789	2	100	0.07	gtdb
GCF_012113595.1	d__Bacteria	p__Bacteroidota	c__Bacteroidia	o__Bacteroidales	f__Bacteroidaceae	g__Bacteroides	s__Bacteroides sp012113595		6782182	1	99.26	0.56	gtdb
GCF_001553605.1	d__Bacteria	p__Desulfobacterota	c__Desulfovibrionia	o__Desulfovibrionales	f__Desulfovibrionaceae	g__Desulfovibrio	s__Desulfovibrio fairfieldensis		3699310	1	99.41	0	gtdb
GCA_900545705.1	d__Bacteria	p__Verrucomicrobiota	c__Verrucomicrobiae	o__Opitutales	f__CAG-312	g__Merdousia	s__Merdousia sp900545705		144298	27	93.24	0.68	gtdb
GCF_000187585.1	d__Bacteria	p__Bacillota	c__Bacilli	o__Lactobacillales	f__Streptococcaceae	g__Streptococcus	s__Streptococcus peroris		179248	16	98.31	0.34	gtdb
GCA_902763335.1	d__Bacteria	p__Bacillota_A	c__Clostridia	o__Lachnospirales	f__Lachnospiraceae	g__UBA2821	s__UBA2821 sp902763335		36446	113	98.66	0	gtdb
GCA_018223435.1	d__Bacteria	p__Bacillota_A	c__Clostridia	o__Lachnospirales	f__Lachnospiraceae	g__Limivivens	s__Limivivens sp900543575		4042890	4	99.37	0.21	gtdb
GCA_902373375.1	d__Bacteria	p__Actinomycetota	c__Coriobacteriia	o__Coriobacteriales	f__Atopobiaceae	g__Lancefieldella	s__Lancefieldella sp902373375		20872	83	77.93	3.45	gtdb
GCA_900551985.1	d__Bacteria	p__Bacteroidota	c__Bacteroidia	o__Bacteroidales	f__Bacteroidaceae	g__Prevotella	s__Prevotella sp900551985		12255	394	92.77	3.65	gtdb
GCA_001618065.1	d__Bacteria	p__Pseudomonadota	c__Gammaproteobacteria	o__Burkholderiales	f__Neisseriaceae	g__Neisseria	s__Neisseria flavescens_A		87875	73	99.48	0	gtdb
GCA_905221545.1	d__Bacteria	p__Bacillota	c__Bacilli	o__Lactobacillales	f__Streptococcaceae	g__Streptococcus	s__Streptococcus sp905221545		164608	61	99.82	0.8	gtdb
GCA_900541025.1	d__Bacteria	p__Actinomycetota	c__Coriobacteriia	o__Coriobacteriales	f__Coriobacteriaceae	g__Collinsella	s__Collinsella sp900541025		63356	62	100	0.81	gtdb
GCA_900545285.1	d__Bacteria	p__Bacillota_A	c__Clostridia	o__Oscillospirales	f__Ruminococcaceae	g__Ruminococcus_C	s__Ruminococcus_C sp900545285		36567	97	90.6	0	gtdb
GCA_002438685.1	d__Bacteria	p__Bacillota_A	c__Clostridia	o__Oscillospirales	f__Acutalibacteraceae	g__CAG-177	s__CAG-177 sp002438685		12466	284	86.81	0.67	gtdb
GCA_900541685.1	d__Bacteria	p__Actinomycetota	c__Coriobacteriia	o__Coriobacteriales	f__Coriobacteriaceae	g__Collinsella	s__Collinsella sp900541685		77604	40	99.19	0.81	gtdb
GCA_902363675.1	d__Bacteria	p__Bacillota_A	c__Clostridia	o__Lachnospirales	f__Lachnospiraceae	g__Agathobacter	s__Agathobacter sp000434275		98959	173	99.21	1.36	gtdb
GCA_900547125.1	d__Bacteria	p__Actinomycetota	c__Coriobacteriia	o__Coriobacteriales	f__Coriobacteriaceae	g__Collinsella	s__Collinsella sp900547125		16629	160	97.14	2	gtdb
GCA_900760215.1	d__Bacteria	p__Actinomycetota	c__Coriobacteriia	o__Coriobacteriales	f__Coriobacteriaceae	g__Collinsella	s__Collinsella sp900760215		40563	77	96.77	0.81	gtdb
GCA_944377405.1	d__Bacteria	p__Bacillota_A	c__Clostridia	o__Lachnospirales	f__Lachnospiraceae	g__Avilachnospira	s__Avilachnospira sp944377405		164703	17	94.57	0.21	gtdb
GCF_004331385.1	d__Bacteria	p__Pseudomonadota	c__Gammaproteobacteria	o__Enterobacterales	f__Enterobacteriaceae	g__Enterobacter	s__Enterobacter quasihormaechei		214685	51	99.97	0.25	gtdb
GCA_900541015.1	d__Bacteria	p__Actinomycetota	c__Coriobacteriia	o__Coriobacteriales	f__Coriobacteriaceae	g__Collinsella	s__Collinsella sp900541015		57209	60	100	0.81	gtdb
GCA_934646865.1	d__Bacteria	p__Actinomycetota	c__Coriobacteriia	o__Coriobacteriales	f__Coriobacteriaceae	g__Collinsella	s__Collinsella sp934646865		24090	204	90.52	1.61	gtdb
GCA_003523255.1	d__Bacteria	p__Bacillota_A	c__Clostridia	o__Christensenellales	f__Borkfalkiaceae	g__UBA1259	s__UBA1259 sp003523255		107302	47	92.14	0.81	gtdb
GCA_019414565.1	d__Bacteria	p__Actinomycetota	c__Coriobacteriia	o__Coriobacteriales	f__Coriobacteriaceae	g__Collinsella	s__Collinsella sp019414565		91883	44	100	1.61	gtdb
GCA_021641225.1	d__Bacteria	p__Actinomycetota	c__Coriobacteriia	o__Coriobacteriales	f__Coriobacteriaceae	g__Collinsella	s__Collinsella aerofaciens_AJ		9469	263	87.7	0.81	gtdb
GCA_934307695.1	d__Bacteria	p__Bacillota_A	c__Clostridia	o__Lachnospirales	f__Lachnospiraceae	g__Agathobacter	s__Agathobacter sp934307695		195674	24	89.49	0	gtdb
GCA_019550975.1	d__Bacteria	p__Bacteroidota	c__Bacteroidia	o__Bacteroidales	f__Bacteroidaceae	g__Phocaeicola	s__Phocaeicola excrementipullorum		134697	65	99.13	0.19	gtdb
GCA_900545175.1	d__Bacteria	p__Bacillota_A	c__Clostridia	o__Lachnospirales	f__Lachnospiraceae	g__CAG-882	s__CAG-882 sp900545175		61964	67	95.75	1.01	gtdb
GCF_000164675.2	d__Bacteria	p__Bacillota	c__Bacilli	o__Lactobacillales	f__Streptococcaceae	g__Streptococcus	s__Streptococcus parasanguinis		2153652	1	99.89	0.17	gtdb
GCA_003480165.1	d__Bacteria	p__Bacillota	c__Bacilli	o__Erysipelotrichales	f__Erysipelotrichaceae	g__Absicoccus	s__Absicoccus sp000434355		110953	34	97.17	3.13	gtdb
GCA_900545865.1	d__Bacteria	p__Bacillota_A	c__Clostridia	o__Monoglobales	f__Monoglobaceae	g__UMGS1820	s__UMGS1820 sp900545865		45759	112	96.42	1.34	gtdb
GCA_900556015.1	d__Bacteria	p__Bacillota_A	c__Clostridia	o__Oscillospirales	f__Oscillospiraceae	g__Vescimonas	s__Vescimonas sp900556015		5241	297	67.24	1.72	gtdb
GCA_900545615.1	d__Bacteria	p__Actinomycetota	c__Coriobacteriia	o__Coriobacteriales	f__Coriobacteriaceae	g__Collinsella	s__Collinsella sp900545615		28278	105	94.35	0.81	gtdb
GCA_905194675.1	d__Bacteria	p__Actinomycetota	c__Coriobacteriia	o__Coriobacteriales	f__Coriobacteriaceae	g__Collinsella	s__Collinsella sp905194675		42412	95	99.19	0.81	gtdb
GCA_002435545.1	d__Bacteria	p__Bacillota_A	c__Clostridia	o__Lachnospirales	f__Lachnospiraceae	g__Eubacterium_F	s__Eubacterium_F sp002435545		9934	500	85.33	1.96	gtdb
GCF_009695865.1	d__Bacteria	p__Bacillota_A	c__Clostridia	o__Peptostreptococcales	f__Anaerovoracaceae	g__Baileyella	s__Baileyella intestinalis		334353	23	99.29	0	gtdb
GCA_934122385.1	d__Bacteria	p__Bacillota_A	c__Clostridia	o__TANB77	f__CAG-508	g__CAG-269	s__CAG-269 sp934122385		20483	125	67.72	0.87	gtdb
GCA_900539945.1	d__Bacteria	p__Bacillota_A	c__Clostridia	o__Oscillospirales	f__Ruminococcaceae	g__Faecalibacterium	s__Faecalibacterium sp900539945		63247	52	97.28	0	gtdb
GCA_019414025.1	d__Bacteria	p__Actinomycetota	c__Coriobacteriia	o__Coriobacteriales	f__Coriobacteriaceae	g__Collinsella	s__Collinsella sp019414025		70995	55	99.19	0.81	gtdb
GCA_900766125.1	d__Bacteria	p__Bacillota_C	c__Negativicutes	o__Veillonellales	f__Veillonellaceae	g__Veillonella	s__Veillonella sp900766125		6844	297	56.9	1.72	gtdb
GCA_019419645.1	d__Bacteria	p__Actinomycetota	c__Coriobacteriia	o__Coriobacteriales	f__Coriobacteriaceae	g__Collinsella	s__Collinsella sp019419645		25312	110	97.29	1.61	gtdb
GCF_015554145.1	d__Bacteria	p__Actinomycetota	c__Coriobacteriia	o__Coriobacteriales	f__Coriobacteriaceae	g__Collinsella	s__Collinsella aerofaciens_AA		77644	51	100	0.81	gtdb
GCA_000434635.1	d__Bacteria	p__Bacillota_A	c__Clostridia	o__Oscillospirales	f__Oscillospiraceae	g__Faecousia	s__Faecousia sp000434635		11074	453	98.43	0	gtdb
GCA_019423795.1	d__Bacteria	p__Bacillota_A	c__Clostridia	o__Lachnospirales	f__Lachnospiraceae	g__Anaerostipes	s__Anaerostipes sp019423795		32606	113	86.94	3.86	gtdb
GCF_001521715.1	d__Bacteria	p__Pseudomonadota	c__Gammaproteobacteria	o__Enterobacterales	f__Enterobacteriaceae	g__Enterobacter	s__Enterobacter asburiae		4713742	5	98.97	0.63	gtdb
GCF_001598695.1	d__Bacteria	p__Pseudomonadota	c__Gammaproteobacteria	o__Enterobacterales	f__Enterobacteriaceae	g__Klebsiella	s__Klebsiella oxytoca		358212	43	100	0.07	gtdb
GCA_900553105.1	d__Bacteria	p__Pseudomonadota	c__Gammaproteobacteria	o__Burkholderiales	f__Burkholderiaceae_A	g__Aphodousia	s__Aphodousia sp900553105		8741	208	83.39	2.5	gtdb
GCA_023708985.1	d__Bacteria	p__Actinomycetota	c__Coriobacteriia	o__Coriobacteriales	f__Coriobacteriaceae	g__Collinsella	s__Collinsella sp023708985		89840	37	100	0.81	gtdb
GCA_934456365.1	d__Bacteria	p__Bacillota_A	c__Clostridia	o__Oscillospirales	f__UMGS1783	g__CAKSHC01	s__CAKSHC01 sp934456365		203883	13	87.92	0	gtdb
GCA_905206365.1	d__Bacteria	p__Pseudomonadota	c__Gammaproteobacteria	o__Burkholderiales	f__Burkholderiaceae_A	g__Sutterella	s__Sutterella sp905206365		43223	93	97.52	0.62	gtdb
GCA_934454005.1	d__Bacteria	p__Bacillota_A	c__Clostridia	o__Oscillospirales	f__Acutalibacteraceae	g__HGM12814	s__HGM12814 sp934454005		5516	755	93.1	8.23	gtdb
GCA_934525325.1	d__Bacteria	p__Bacillota_A	c__Clostridia	o__Oscillospirales	f__Ruminococcaceae	g__Faecalibacterium	s__Faecalibacterium sp934525325		25526	134	71.61	0	gtdb
GCF_000160755.1	d__Bacteria	p__Pseudomonadota	c__Gammaproteobacteria	o__Enterobacterales	f__Enterobacteriaceae	g__Proteus	s__Proteus mirabilis		130334	115	100	0	gtdb
GCA_934130285.1	d__Bacteria	p__Bacillota_A	c__Clostridia	o__TANB77	f__CAG-508	g__UMGS1994	s__UMGS1994 sp934130285		394810	6	78.91	2.68	gtdb
GCA_019413925.1	d__Bacteria	p__Actinomycetota	c__Coriobacteriia	o__Coriobacteriales	f__Coriobacteriaceae	g__Collinsella	s__Collinsella sp019413925		80694	54	99.19	1.61	gtdb
GCA_014845975.1	d__Bacteria	p__Bacillota	c__Bacilli	o__RF39	f__UBA660	g__CAJOJO01	s__CAJOJO01 sp014845975		6924	122	67.42	0	gtdb
GCA_900542115.1	d__Bacteria	p__Bacillota_A	c__Clostridia	o__Oscillospirales	f__Oscillospiraceae	g__Dysosmobacter	s__Dysosmobacter sp900542115		14735	173	96.31	0.34	gtdb
GCA_000437595.1	d__Bacteria	p__Bacillota_A	c__Clostridia	o__Christensenellales	f__CAG-74	g__UBA11524	s__UBA11524 sp000437595		23613	256	99.13	1.17	gtdb
GCF_000702905.1	d__Bacteria	p__Bacillota_C	c__Negativicutes	o__Selenomonadales	f__Selenomonadaceae	g__Mitsuokella	s__Mitsuokella jalaludinii		85299	66	100	0.08	gtdb
GCA_934234035.1	d__Bacteria	p__Bacillota_A	c__Clostridia	o__Peptostreptococcales	f__Anaerovoracaceae	g__VUNA01	s__VUNA01 sp934234035		64526	53	99.29	0	gtdb
GCF_005843885.1	d__Bacteria	p__Pseudomonadota	c__Gammaproteobacteria	o__Enterobacterales	f__Enterobacteriaceae	g__Escherichia	s__Escherichia sp005843885		5120753	1	99.26	0.17	gtdb
GCA_900765165.1	d__Bacteria	p__Bacillota_C	c__Negativicutes	o__Veillonellales	f__Veillonellaceae	g__Veillonella_A	s__Veillonella_A sp900765165		20708	213	97.01	0.05	gtdb
GCA_900751995.1	d__Bacteria	p__Bacillota_A	c__Clostridia	o__Lachnospirales	f__Lachnospiraceae	g__Blautia_A	s__Blautia_A sp900751995		45658	81	70.17	0.32	gtdb
GCA_923172585.1	d__Bacteria	p__Pseudomonadota	c__Gammaproteobacteria	o__Enterobacterales_A	f__Pasteurellaceae	g__Haemophilus	s__Haemophilus influenzae_G		1275293	8	95.71	0.33	gtdb
GCA_900552015.1	d__Bacteria	p__Bacillota_A	c__Clostridia	o__Oscillospirales	f__Oscillospiraceae	g__ER4	s__ER4 sp900552015		30068	94	92.78	3.58	gtdb
GCA_934636665.1	d__Bacteria	p__Actinomycetota	c__Coriobacteriia	o__Coriobacteriales	f__Eggerthellaceae	g__Senegalimassilia	s__Senegalimassilia sp934636665		106612	37	100	0	gtdb
GCA_900548205.1	d__Bacteria	p__Bacillota_A	c__Clostridia	o__Lachnospirales	f__Lachnospiraceae	g__Roseburia	s__Roseburia sp900548205		27096	111	87.15	0.46	gtdb
GCA_934365945.1	d__Bacteria	p__Bacillota_A	c__Clostridia	o__Lachnospirales	f__Lachnospiraceae	g__Agathobacter	s__Agathobacter sp934365945		134703	36	91.79	0.24	gtdb
GCF_002005545.1	d__Bacteria	p__Bacillota	c__Bacilli	o__Lactobacillales	f__Streptococcaceae	g__Streptococcus	s__Streptococcus mitis_I		1450140	9	99.87	0.2	gtdb
GCF_003470665.1	d__Bacteria	p__Actinomycetota	c__Coriobacteriia	o__Coriobacteriales	f__Coriobacteriaceae	g__Collinsella	s__Collinsella sp003470665		84237	59	100	0.81	gtdb
GCF_019448285.1	d__Bacteria	p__Bacillota	c__Bacilli	o__Lactobacillales	f__Streptococcaceae	g__Streptococcus	s__Streptococcus sp019448285		216381	95	99.82	0.7	gtdb
GCA_900757285.1	d__Bacteria	p__Actinomycetota	c__Coriobacteriia	o__Coriobacteriales	f__Coriobacteriaceae	g__Collinsella	s__Collinsella sp900757285		7389	331	85.62	3.3	gtdb
GCF_003463825.1	d__Bacteria	p__Bacillota_C	c__Negativicutes	o__Veillonellales	f__Veillonellaceae	g__Veillonella	s__Veillonella sp003463825		28599	125	99.85	0	gtdb
GCA_900546455.1	d__Bacteria	p__Actinomycetota	c__Coriobacteriia	o__Coriobacteriales	f__Coriobacteriaceae	g__Collinsella	s__Collinsella sp900546455		29431	132	96.77	1.61	gtdb
GCA_001914195.1	d__Bacteria	p__Bacillota	c__Bacilli	o__Lactobacillales	f__Streptococcaceae	g__Streptococcus	s__Streptococcus mitis_F		67286	51	99.6	0.28	gtdb
GCA_934565655.1	d__Bacteria	p__Bacillota_A	c__Clostridia	o__Oscillospirales	f__Oscillospiraceae	g__Vescimonas	s__Vescimonas sp934565655		85443	40	85.23	1.01	gtdb
GCF_003942795.1	d__Bacteria	p__Bacillota	c__Bacilli	o__Lactobacillales	f__Streptococcaceae	g__Streptococcus	s__Streptococcus mitis_BJ		81081	64	99.87	0.73	gtdb
GCA_900550835.1	d__Bacteria	p__Actinomycetota	c__Coriobacteriia	o__Coriobacteriales	f__Coriobacteriaceae	g__Collinsella	s__Collinsella sp900550835		12113	222	88.06	1.95	gtdb
GCF_009695765.1	d__Bacteria	p__Bacillota_A	c__Clostridia	o__Lachnospirales	f__Lachnospiraceae	g__Roseburia_A	s__Roseburia_A porci		98086	61	99.03	0.97	gtdb
GCA_000980705.1	d__Bacteria	p__Bacillota_A	c__Clostridia	o__Oscillospirales	f__Ruminococcaceae	g__Ruminococcus_C	s__Ruminococcus_C sp000980705		615138	129	87.25	0.73	gtdb
GCF_003437035.1	d__Bacteria	p__Actinomycetota	c__Coriobacteriia	o__Coriobacteriales	f__Coriobacteriaceae	g__Collinsella	s__Collinsella sp003437035		141342	48	100	0.81	gtdb
GCA_019118405.1	d__Bacteria	p__Bacillota	c__Bacilli	o__Lactobacillales	f__Lactobacillaceae	g__Limosilactobacillus	s__Limosilactobacillus gallistercoris		12513	118	84.57	0.27	gtdb
GCF_019429565.1	d__Bacteria	p__Actinomycetota	c__Actinomycetia	o__Actinomycetales	f__Actinomycetaceae	g__Pauljensenia	s__Pauljensenia sp018382595		1671389	4	100	0.59	gtdb
GCA_003458705.1	d__Bacteria	p__Bacillota_A	c__Clostridia	o__Lachnospirales	f__Lachnospiraceae	g__Lachnospira	s__Lachnospira sp003537285		56031	150	98.08	0.67	gtdb
GCA_900553345.1	d__Bacteria	p__Actinomycetota	c__Coriobacteriia	o__Coriobacteriales	f__Coriobacteriaceae	g__Collinsella	s__Collinsella sp900553345		6248	327	78.93	1.69	gtdb
GCA_934351925.1	d__Bacteria	p__Bacillota_A	c__Clostridia	o__Lachnospirales	f__Lachnospiraceae	g__CAG-882	s__CAG-882 sp934351925		91440	70	95.75	1.45	gtdb
GCF_014297355.1	d__Bacteria	p__Bacillota_A	c__Clostridia	o__Lachnospirales	f__Lachnospiraceae	g__Blautia_A	s__Blautia_A intestinalis		391748	44	99.37	0	gtdb
GCA_900546605.1	d__Bacteria	p__Bacteroidota	c__Bacteroidia	o__Bacteroidales	f__Bacteroidaceae	g__Alloprevotella	s__Alloprevotella sp900546605		9008	323	90.03	0.37	gtdb
GCA_934667475.1	d__Bacteria	p__Bacteroidota	c__Bacteroidia	o__Bacteroidales	f__Muribaculaceae	g__Sodaliphilus	s__Sodaliphilus sp934667475		126808	51	93.77	0.5	gtdb
GCF_005696695.1	d__Bacteria	p__Actinomycetota	c__Actinomycetia	o__Actinomycetales	f__Actinomycetaceae	g__Pauljensenia	s__Pauljensenia odontolytica_C		2360133	1	100	0.47	gtdb
GCA_000759755.1	d__Bacteria	p__Pseudomonadota	c__Gammaproteobacteria	o__Enterobacterales	f__Enterobacteriaceae	g__Citrobacter	s__Citrobacter werkmanii		427597	30	99.87	0.35	gtdb
GCF_023472875.1	d__Bacteria	p__Pseudomonadota	c__Gammaproteobacteria	o__Burkholderiales	f__Neisseriaceae	g__Neisseria	s__Neisseria perflava		52486	85	99.7	0.34	gtdb
GCA_934131005.1	d__Bacteria	p__Bacillota	c__Bacilli	o__RF39	f__UBA660	g__RUG11198	s__RUG11198 sp934131005		92599	22	89.89	1.69	gtdb
GCF_023109675.1	d__Bacteria	p__Bacillota	c__Bacilli	o__Lactobacillales	f__Streptococcaceae	g__Streptococcus	s__Streptococcus parasanguinis_I		128761	44	100	0.8	gtdb
GCF_900240275.1	d__Bacteria	p__Bacillota	c__Bacilli	o__Lactobacillales	f__Lactobacillaceae	g__Limosilactobacillus	s__Limosilactobacillus timonensis		1328075	17	100	0.54	gtdb
GCA_000434995.1	d__Bacteria	p__Bacillota_A	c__Clostridia	o__Oscillospirales	f__Acutalibacteraceae	g__Eubacterium_R	s__Eubacterium_R sp000434995		31573	123	98.66	0	gtdb
GCF_000828055.2	d__Bacteria	p__Pseudomonadota	c__Gammaproteobacteria	o__Enterobacterales	f__Enterobacteriaceae	g__Klebsiella	s__Klebsiella variicola		5521203	1	100	0.26	gtdb
GCA_900556515.1	d__Bacteria	p__Actinomycetota	c__Coriobacteriia	o__Coriobacteriales	f__Coriobacteriaceae	g__Collinsella	s__Collinsella sp900556515		6318	319	73.32	3.3	gtdb
GCA_900542155.1	d__Bacteria	p__Actinomycetota	c__Coriobacteriia	o__Coriobacteriales	f__Coriobacteriaceae	g__Collinsella	s__Collinsella sp900542155		87895	38	98.66	0.81	gtdb
GCA_024205745.1	d__Bacteria	p__Pseudomonadota	c__Gammaproteobacteria	o__Burkholderiales	f__Neisseriaceae	g__Neisseria	s__Neisseria flavescens_B		2213981	1	99.47	0.11	gtdb
GCA_900540665.1	d__Bacteria	p__Bacillota	c__Bacilli	o__Erysipelotrichales	f__Coprobacillaceae	g__Catenibacterium	s__Catenibacterium sp900540665		22787	123	96.23	0	gtdb
GCA_905216075.1	d__Bacteria	p__Actinomycetota	c__Coriobacteriia	o__Coriobacteriales	f__Coriobacteriaceae	g__Collinsella	s__Collinsella sp905216075		6966	384	94.53	4.44	gtdb
GCF_013277515.1	d__Bacteria	p__Bacillota	c__Bacilli	o__Lactobacillales	f__Streptococcaceae	g__Streptococcus	s__Streptococcus sp013277515		103246	53	99.82	0.73	gtdb
GCA_900545605.1	d__Bacteria	p__Actinomycetota	c__Coriobacteriia	o__Coriobacteriales	f__Coriobacteriaceae	g__Collinsella	s__Collinsella sp900545605		46757	62	94.35	0.81	gtdb
GCA_934631005.1	d__Bacteria	p__Bacillota_A	c__Clostridia	o__Oscillospirales	f__Oscillospiraceae	g__CAG-170	s__CAG-170 sp934631005		63097	59	93.96	1.34	gtdb
GCA_000433255.1	d__Bacteria	p__Bacillota	c__Bacilli	o__RF39	f__UBA660	g__CAG-605	s__CAG-605 sp000433255		35940	62	91.57	0	gtdb
GCA_934655755.1	d__Bacteria	p__Actinomycetota	c__Coriobacteriia	o__Coriobacteriales	f__Coriobacteriaceae	g__Collinsella	s__Collinsella sp934655755		113120	37	85.48	0.81	gtdb
GCA_004555405.1	d__Bacteria	p__Bacillota_A	c__Clostridia	o__Oscillospirales	f__Ruminococcaceae	g__SFIE01	s__SFIE01 sp004555405		50019	68	93.88	0	gtdb
GCA_900551625.1	d__Bacteria	p__Actinomycetota	c__Coriobacteriia	o__Coriobacteriales	f__Coriobacteriaceae	g__Collinsella	s__Collinsella sp900551625		7380	285	83.67	1.53	gtdb
GCA_000437275.1	d__Bacteria	p__Bacillota_A	c__Clostridia	o__Lachnospirales	f__Lachnospiraceae	g__CAG-411	s__CAG-411 sp000437275		28934	207	97.99	0.67	gtdb
GCF_001729805.1	d__Bacteria	p__Pseudomonadota	c__Gammaproteobacteria	o__Enterobacterales	f__Enterobacteriaceae	g__Enterobacter	s__Enterobacter roggenkampii		4748414	2	99.07	0.09	gtdb
GCA_900751665.1	d__Bacteria	p__Actinomycetota	c__Coriobacteriia	o__Coriobacteriales	f__Coriobacteriaceae	g__Collinsella	s__Collinsella sp900751665		9949	225	88.25	0.4	gtdb
GCA_934140575.1	d__Bacteria	p__Bacillota	c__Bacilli	o__RF39	f__UBA660	g__UBA3789	s__UBA3789 sp934140575		89406	27	87.64	0	gtdb
GCF_000156195.1	d__Bacteria	p__Bacteroidota	c__Bacteroidia	o__Bacteroidales	f__Bacteroidaceae	g__Bacteroides	s__Bacteroides finegoldii		95313	138	93.39	0.81	gtdb
GCA_900066355.1	d__Bacteria	p__Bacillota_A	c__Clostridia	o__Lachnospirales	f__Lachnospiraceae	g__Blautia_A	s__Blautia_A sp900066355		157848	43	99.37	0.63	gtdb
GCF_000159695.1	d__Bacteria	p__Bacillota_A	c__Clostridia	o__Tissierellales	f__Peptoniphilaceae	g__Finegoldia	s__Finegoldia magna_F		573678	3	99.39	0	gtdb
GCA_900556345.1	d__Bacteria	p__Bacillota_A	c__Clostridia	o__TANB77	f__CAG-508	g__CAG-269	s__CAG-269 sp900556345		5642	264	60.84	0.69	gtdb
GCF_023110245.1	d__Bacteria	p__Bacillota	c__Bacilli	o__Lactobacillales	f__Streptococcaceae	g__Streptococcus	s__Streptococcus mitis_BV		47336	79	99.82	0.2	gtdb
GCA_934757945.1	d__Bacteria	p__Bacillota	c__Bacilli	o__Erysipelotrichales	f__Erysipelotrichaceae	g__Bulleidia	s__Bulleidia sp934757945		20120	165	95.24	0	gtdb
GCA_900555355.1	d__Bacteria	p__Actinomycetota	c__Coriobacteriia	o__Coriobacteriales	f__Coriobacteriaceae	g__Collinsella	s__Collinsella sp900555355		6669	325	82.26	4.03	gtdb
GCF_000722705.1	d__Bacteria	p__Bacillota	c__Bacilli	o__Lactobacillales	f__Streptococcaceae	g__Streptococcus	s__Streptococcus mitis_P		505369	11	99.82	0.2	gtdb
GCA_015265375.1	d__Bacteria	p__Actinomycetota	c__Actinomycetia	o__Actinomycetales	f__Micrococcaceae	g__Rothia	s__Rothia sp015265375		31588	114	99.33	0.39	gtdb
GCA_001916055.1	d__Bacteria	p__Bacillota_A	c__Clostridia	o__TANB77	f__CAG-508	g__CAG-269	s__CAG-269 sp001916055		34860	80	71.63	0.67	gtdb
GCA_905221065.1	d__Bacteria	p__Bacillota	c__Bacilli	o__Lactobacillales	f__Streptococcaceae	g__Streptococcus	s__Streptococcus sp905221065		113588	113	99.82	0.2	gtdb
GCA_905221105.1	d__Bacteria	p__Bacillota	c__Bacilli	o__Lactobacillales	f__Streptococcaceae	g__Streptococcus	s__Streptococcus sp905221105		183744	52	99.78	0.84	gtdb
GCF_015555045.1	d__Bacteria	p__Actinomycetota	c__Coriobacteriia	o__Coriobacteriales	f__Coriobacteriaceae	g__Collinsella	s__Collinsella aerofaciens_W		63640	66	100	0.81	gtdb
GCF_014384965.1	d__Bacteria	p__Bacillota_A	c__Clostridia	o__Lachnospirales	f__Lachnospiraceae	g__Butyribacter	s__Butyribacter hominis		181819	41	88.59	0	gtdb
GCF_900155865.1	d__Bacteria	p__Bacteroidota	c__Bacteroidia	o__Bacteroidales	f__Bacteroidaceae	g__Bacteroides	s__Bacteroides bouchesdurhonensis		1226094	27	99.26	0.93	gtdb
GCA_934500705.1	d__Bacteria	p__Bacillota_A	c__Clostridia	o__UMGS1810	f__UMGS1810	g__RGIG8748	s__RGIG8748 sp934500705		137911	25	98.43	0.67	gtdb
GCA_900764415.1	d__Bacteria	p__Actinomycetota	c__Coriobacteriia	o__Coriobacteriales	f__Coriobacteriaceae	g__Collinsella	s__Collinsella sp900764415		5792	484	87.71	3.49	gtdb
GCA_934539245.1	d__Bacteria	p__Bacillota_A	c__Clostridia	o__Oscillospirales	f__Ruminococcaceae	g__Faecalibacterium	s__Faecalibacterium sp934539245		36834	108	94.24	0	gtdb
GCA_000438115.1	d__Bacteria	p__Bacteroidota	c__Bacteroidia	o__Bacteroidales	f__Bacteroidaceae	g__Alloprevotella	s__Alloprevotella sp000438115		21242	202	96.56	0.56	gtdb
GCA_905209435.1	d__Bacteria	p__Bacillota_A	c__Clostridia	o__Lachnospirales	f__Lachnospiraceae	g__Blautia_A	s__Blautia_A sp905209435		26035	231	65.89	0	gtdb
GCA_900767815.1	d__Bacteria	p__Bacillota_A	c__Clostridia	o__Christensenellales	f__Borkfalkiaceae	g__UBA10281	s__UBA10281 sp900767815		32526	263	92.74	2.42	gtdb
GCA_900545905.1	d__Bacteria	p__Actinomycetota	c__Coriobacteriia	o__Coriobacteriales	f__Coriobacteriaceae	g__Collinsella	s__Collinsella sp900545905		6390	342	94.09	0.92	gtdb
GCA_900759415.1	d__Bacteria	p__Bacillota_C	c__Negativicutes	o__Veillonellales	f__Dialisteraceae	g__Dialister	s__Dialister sp900759415		22316	163	65.82	0	gtdb
GCF_014334015.1	d__Bacteria	p__Bacteroidota	c__Bacteroidia	o__Bacteroidales	f__Bacteroidaceae	g__Bacteroides	s__Bacteroides intestinigallinarum		6745934	1	99.51	0.11	gtdb
GCA_934658705.1	d__Bacteria	p__Actinomycetota	c__Coriobacteriia	o__Coriobacteriales	f__Coriobacteriaceae	g__Collinsella	s__Collinsella sp934658705		46910	66	53.45	0	gtdb
GCF_003459245.1	d__Bacteria	p__Actinomycetota	c__Coriobacteriia	o__Coriobacteriales	f__Coriobacteriaceae	g__Collinsella	s__Collinsella sp003459245		70742	69	100	1.61	gtdb
GCF_007035645.1	d__Bacteria	p__Pseudomonadota	c__Gammaproteobacteria	o__Enterobacterales	f__Enterobacteriaceae	g__Enterobacter	s__Enterobacter asburiae_B		4639748	2	99.97	0.33	gtdb
GCA_018365265.1	d__Bacteria	p__Bacillota	c__Bacilli	o__Lactobacillales	f__Streptococcaceae	g__Streptococcus	s__Streptococcus parasanguinis_G		38837	92	100	0.58	gtdb
GCF_020215665.1	d__Bacteria	p__Bacillota_A	c__Clostridia	o__Lachnospirales	f__Lachnospiraceae	g__Blautia	s__Blautia sp001304935		6247046	1	99.36	0	gtdb
GCF_006385805.1	d__Bacteria	p__Bacillota	c__Bacilli	o__Lactobacillales	f__Streptococcaceae	g__Streptococcus	s__Streptococcus xiaochunlingii		1466888	5	100	0.11	gtdb
GCA_000434215.1	d__Bacteria	p__Bacteroidota	c__Bacteroidia	o__Bacteroidales	f__UBA11471	g__UBA11471	s__UBA11471 sp000434215		16925	289	95.85	0.13	gtdb
GCA_900550695.1	d__Bacteria	p__Bacillota_A	c__Clostridia	o__Oscillospirales	f__Ruminococcaceae	g__UMGS363	s__UMGS363 sp900550695		26452	127	78.5	0	gtdb
GCA_934654625.1	d__Bacteria	p__Actinomycetota	c__Coriobacteriia	o__Coriobacteriales	f__Coriobacteriaceae	g__Collinsella	s__Collinsella sp934654625		32672	120	88.58	0.89	gtdb
GCA_900768465.1	d__Bacteria	p__Pseudomonadota	c__Alphaproteobacteria	o__RF32	f__CAG-977	g__UBA2903	s__UBA2903 sp900768465		153902	25	72.35	0.05	gtdb
GCF_001113365.1	d__Bacteria	p__Bacillota	c__Bacilli	o__Lactobacillales	f__Streptococcaceae	g__Streptococcus	s__Streptococcus pneumoniae_C		229591	40	99.82	0.3	gtdb
GCF_902364945.1	d__Bacteria	p__Actinomycetota	c__Coriobacteriia	o__Coriobacteriales	f__Coriobacteriaceae	g__Collinsella	s__Collinsella aerofaciens_O		235283	34	100	0.81	gtdb
GCA_900542495.1	d__Bacteria	p__Bacillota_A	c__Clostridia	o__Lachnospirales	f__Lachnospiraceae	g__Roseburia	s__Roseburia sp900542495		111187	53	97.56	0.72	gtdb
GCF_010509075.1	d__Bacteria	p__Actinomycetota	c__Coriobacteriia	o__Coriobacteriales	f__Coriobacteriaceae	g__Collinsella	s__Collinsella aerofaciens		2428218	3	100	0.81	gtdb
GCA_900757385.1	d__Bacteria	p__Actinomycetota	c__Coriobacteriia	o__Coriobacteriales	f__Coriobacteriaceae	g__Collinsella	s__Collinsella sp900757385		11493	239	89.52	1.84	gtdb
GCA_905221375.1	d__Bacteria	p__Bacillota	c__Bacilli	o__Lactobacillales	f__Streptococcaceae	g__Streptococcus	s__Streptococcus sp905221375		168289	106	99.82	0.65	gtdb
GCA_900551745.1	d__Bacteria	p__Bacillota_C	c__Negativicutes	o__Acidaminococcales	f__Acidaminococcaceae	g__Phascolarctobacterium	s__Phascolarctobacterium sp900551745		81721	34	83.21	1.5	gtdb
GCA_905205995.1	d__Bacteria	p__Pseudomonadota	c__Gammaproteobacteria	o__Enterobacterales_A	f__Pasteurellaceae	g__Haemophilus_D	s__Haemophilus_D sp905205995		39469	91	99.64	0.25	gtdb
GCA_905221115.1	d__Bacteria	p__Bacillota	c__Bacilli	o__Lactobacillales	f__Streptococcaceae	g__Streptococcus	s__Streptococcus sp905221115		133543	118	99.82	0.2	gtdb
GCA_900540855.1	d__Bacteria	p__Actinomycetota	c__Coriobacteriia	o__Coriobacteriales	f__Coriobacteriaceae	g__Collinsella	s__Collinsella sp900540855		96606	34	100	0.81	gtdb
GCF_000173655.1	d__Bacteria	p__Actinomycetota	c__Actinomycetia	o__Mycobacteriales	f__Mycobacteriaceae	g__Corynebacterium	s__Corynebacterium amycolatum_A		135695	48	99.85	0	gtdb
GCF_002042885.1	d__Bacteria	p__Pseudomonadota	c__Gammaproteobacteria	o__Enterobacterales	f__Enterobacteriaceae	g__Citrobacter	s__Citrobacter portucalensis		297971	40	99.97	0	gtdb
GCF_001810785.1	d__Bacteria	p__Bacillota	c__Bacilli	o__Lactobacillales	f__Streptococcaceae	g__Streptococcus	s__Streptococcus sp001810785		52510	72	99.13	0.2	gtdb
GCA_000438155.1	d__Bacteria	p__Bacillota_A	c__Clostridia	o__Lachnospirales	f__Lachnospiraceae	g__CAG-95	s__CAG-95 sp000438155		21491	256	97.33	2.22	gtdb
GCA_021635425.1	d__Bacteria	p__Bacillota_A	c__Clostridia	o__Christensenellales	f__Borkfalkiaceae	g__UBA10281	s__UBA10281 sp021635425		6208	592	86.29	4.44	gtdb
GCA_934196725.1	d__Bacteria	p__Bacteroidota	c__Bacteroidia	o__Bacteroidales	f__Bacteroidaceae	g__Prevotella	s__Prevotella sp934196725		36363	109	62.07	0	gtdb
GCA_018381425.1	d__Bacteria	p__Pseudomonadota	c__Gammaproteobacteria	o__Enterobacterales_A	f__Pasteurellaceae	g__Haemophilus_D	s__Haemophilus_D parainfluenzae_O		5966	526	93.5	5.53	gtdb
GCA_900765705.1	d__Bacteria	p__Bacillota_A	c__Clostridia	o__Oscillospirales	f__Ruminococcaceae	g__Faecalibacterium	s__Faecalibacterium sp900765705		8673	439	76.47	2.72	gtdb
GCA_934140005.1	d__Bacteria	p__Bacillota_A	c__Clostridia	o__TANB77	f__CAG-508	g__Scatovivens	s__Scatovivens sp934140005		63189	34	82.98	1.86	gtdb
GCA_900544095.1	d__Bacteria	p__Actinomycetota	c__Coriobacteriia	o__Coriobacteriales	f__Coriobacteriaceae	g__Collinsella	s__Collinsella sp900544095		361084	9	100	1.61	gtdb
GCA_019414905.1	d__Bacteria	p__Bacillota	c__Bacilli	o__Lactobacillales	f__Streptococcaceae	g__Streptococcus	s__Streptococcus sp019414905		7067	360	93.33	2.27	gtdb
GCA_934234275.1	d__Bacteria	p__Bacillota_C	c__Negativicutes	o__Acidaminococcales	f__Acidaminococcaceae	g__Phascolarctobacterium_A	s__Phascolarctobacterium_A sp934234275		8255	253	64.53	0.6	gtdb
GCA_934457235.1	d__Bacteria	p__Bacillota_A	c__Clostridia	o__Oscillospirales	f__Ruminococcaceae	g__CAG-115	s__CAG-115 sp934457235		14237	259	93.96	1.51	gtdb
GCF_000448565.1	d__Bacteria	p__Bacillota	c__Bacilli	o__Lactobacillales	f__Streptococcaceae	g__Streptococcus	s__Streptococcus sp000448565		26412	117	97.8	0.29	gtdb
GCA_934654585.1	d__Bacteria	p__Actinomycetota	c__Coriobacteriia	o__Coriobacteriales	f__Coriobacteriaceae	g__Collinsella	s__Collinsella sp934654585		80276	51	90.32	1.61	gtdb
GCF_900638025.1	d__Bacteria	p__Pseudomonadota	c__Gammaproteobacteria	o__Enterobacterales_A	f__Pasteurellaceae	g__Haemophilus_D	s__Haemophilus_D parainfluenzae_J		2062405	1	99.89	0.44	gtdb
GCA_934101445.1	d__Bacteria	p__Bacillota	c__Bacilli	o__RF39	f__UBA660	g__CAG-605	s__CAG-605 sp934101445		6257	270	84.83	1.24	gtdb
GCF_003992115.1	d__Bacteria	p__Bacillota_C	c__Negativicutes	o__Veillonellales	f__Veillonellaceae	g__Veillonella_A	s__Veillonella_A ratti		95000	49	99.4	0	gtdb
GCA_002451755.1	d__Bacteria	p__Bacillota_A	c__Clostridia	o__Oscillospirales	f__Acutalibacteraceae	g__CAG-177	s__CAG-177 sp002451755		14995	254	86.21	4.7	gtdb
GCA_900551655.1	d__Bacteria	p__Actinomycetota	c__Coriobacteriia	o__Coriobacteriales	f__Coriobacteriaceae	g__Collinsella	s__Collinsella sp900551655		6274	357	86.53	2.09	gtdb
GCA_900542235.1	d__Bacteria	p__Actinomycetota	c__Coriobacteriia	o__Coriobacteriales	f__Coriobacteriaceae	g__Collinsella	s__Collinsella sp900542235		22959	123	94.35	0	gtdb
GCA_900541855.1	d__Bacteria	p__Actinomycetota	c__Coriobacteriia	o__Coriobacteriales	f__Coriobacteriaceae	g__Collinsella	s__Collinsella sp900541855		74195	37	99.19	0.81	gtdb
GCA_900553805.1	d__Bacteria	p__Bacillota_A	c__Clostridia	o__Oscillospirales	f__Oscillospiraceae	g__Faecousia	s__Faecousia sp900553805		28464	118	69.04	0	gtdb
GCA_000435515.1	d__Bacteria	p__Bacillota	c__Bacilli	o__RF39	f__UBA660	g__CAG-582	s__CAG-582 sp000435515		37442	51	92.7	2.81	gtdb
GCA_900549025.1	d__Bacteria	p__Actinomycetota	c__Coriobacteriia	o__Coriobacteriales	f__Coriobacteriaceae	g__Collinsella	s__Collinsella sp900549025		48846	63	87.1	0.81	gtdb
GCA_000437435.1	d__Bacteria	p__Cyanobacteriota	c__Vampirovibrionia	o__Gastranaerophilales	f__Gastranaerophilaceae	g__Stercorousia	s__Stercorousia sp000437435		99297	44	88.03	0.85	gtdb
GCF_001654985.1	d__Bacteria	p__Pseudomonadota	c__Gammaproteobacteria	o__Enterobacterales	f__Enterobacteriaceae	g__Kluyvera	s__Kluyvera georgiana		88801	163	99.59	1.76	gtdb
GCF_015670795.1	d__Bacteria	p__Actinomycetota	c__Coriobacteriia	o__Coriobacteriales	f__Coriobacteriaceae	g__Collinsella	s__Collinsella aerofaciens_Q		61633	75	100	0.81	gtdb
GCA_900541665.1	d__Bacteria	p__Actinomycetota	c__Coriobacteriia	o__Coriobacteriales	f__Coriobacteriaceae	g__Collinsella	s__Collinsella sp900541665		41673	91	99.19	0.81	gtdb
GCA_003483745.1	d__Bacteria	p__Bacillota_A	c__Clostridia	o__Lachnospirales	f__Lachnospiraceae	g__Roseburia	s__Roseburia sp003483745		50109	134	93.96	0.6	gtdb
GCF_901542415.1	d__Bacteria	p__Bacillota	c__Bacilli	o__Lactobacillales	f__Streptococcaceae	g__Streptococcus	s__Streptococcus mitis_BL		2134463	4	99.7	3.34	gtdb
GCA_905216215.1	d__Bacteria	p__Bacillota_A	c__Clostridia	o__Lachnospirales	f__Lachnospiraceae	g__Bariatricus	s__Bariatricus sp905216215		38995	126	90.85	1.07	gtdb
GCA_905215725.1	d__Bacteria	p__Actinomycetota	c__Coriobacteriia	o__Coriobacteriales	f__Coriobacteriaceae	g__Collinsella	s__Collinsella sp905215725		22421	145	96.49	3.76	gtdb
GCA_900770515.1	d__Bacteria	p__Bacteroidota	c__Bacteroidia	o__Bacteroidales	f__Bacteroidaceae	g__Prevotella	s__Prevotella sp900770515		9553	493	62.58	2	gtdb
GCF_001457555.1	d__Bacteria	p__Fusobacteriota	c__Fusobacteriia	o__Fusobacteriales	f__Fusobacteriaceae	g__Fusobacterium	s__Fusobacterium polymorphum		2443126	2	100	0	gtdb
GCA_900545725.1	d__Bacteria	p__Bacillota_A	c__Clostridia	o__Lachnospirales	f__Lachnospiraceae	g__Lachnospira	s__Lachnospira sp900545725		24126	154	95.72	1.17	gtdb
GCA_900765105.1	d__Bacteria	p__Bacillota_A	c__Clostridia	o__Oscillospirales	f__Ruminococcaceae	g__Faecalibacterium	s__Faecalibacterium sp900765105		11330	381	88.73	7.11	gtdb
GCA_934426285.1	d__Bacteria	p__Bacillota_A	c__Clostridia	o__Lachnospirales	f__Lachnospiraceae	g__Blautia_A	s__Blautia_A sp934426285		28709	160	83.99	0	gtdb
GCF_900241005.1	d__Bacteria	p__Bacteroidota	c__Bacteroidia	o__Bacteroidales	f__Bacteroidaceae	g__Bacteroides	s__Bacteroides cutis		557396	24	99.07	0.12	gtdb
GCF_000382445.1	d__Bacteria	p__Bacteroidota	c__Bacteroidia	o__Bacteroidales	f__Bacteroidaceae	g__Phocaeicola	s__Phocaeicola massiliensis		170167	55	99.26	0.19	gtdb
GCF_000686565.1	d__Bacteria	p__Campylobacterota	c__Campylobacteria	o__Campylobacterales	f__Helicobacteraceae	g__Helicobacter_A	s__Helicobacter_A bilis		42549	131	96.82	0.64	gtdb
GCF_000245815.1	d__Bacteria	p__Bacillota	c__Bacilli	o__Lactobacillales	f__Carnobacteriaceae	g__Dolosigranulum	s__Dolosigranulum pigrum		207179	16	99.18	2.45	gtdb
GCA_900545665.1	d__Bacteria	p__Actinomycetota	c__Coriobacteriia	o__Coriobacteriales	f__Coriobacteriaceae	g__Collinsella	s__Collinsella sp900545665		58481	62	97.98	1.61	gtdb
GCA_019419545.1	d__Bacteria	p__Actinomycetota	c__Coriobacteriia	o__Coriobacteriales	f__Coriobacteriaceae	g__Collinsella	s__Collinsella sp019419545		59042	68	100	0.81	gtdb
GCA_934133165.1	d__Bacteria	p__Bacillota_A	c__Clostridia	o__TANB77	f__CAG-508	g__UMGS1663	s__UMGS1663 sp934133165		132618	24	75.12	2.18	gtdb
GCA_900556715.1	d__Bacteria	p__Bacillota_C	c__Negativicutes	o__Selenomonadales	f__Selenomonadaceae	g__Megamonas	s__Megamonas sp900556715		33069	64	56.14	0	gtdb
GCA_022739095.1	d__Bacteria	p__Actinomycetota	c__Actinomycetia	o__Actinomycetales	f__Bifidobacteriaceae	g__Bifidobacterium	s__Bifidobacterium sp022739095		10541	299	80.91	2.4	gtdb
GCA_934317215.1	d__Bacteria	p__Bacillota_A	c__Clostridia	o__Lachnospirales	f__Lachnospiraceae	g__Roseburia	s__Roseburia sp934317215		89567	66	92.67	0.85	gtdb
GCA_004555865.1	d__Bacteria	p__Bacillota_A	c__Clostridia	o__Oscillospirales	f__Ruminococcaceae	g__SFJ001	s__SFJ001 sp004555865		87297	39	89.8	0.68	gtdb
GCA_000435535.1	d__Bacteria	p__Bacillota_A	c__Clostridia	o__TANB77	f__CAG-508	g__CAG-269	s__CAG-269 sp000435535		14212	176	72.98	0.45	gtdb
GCA_934215455.1	d__Bacteria	p__Bacillota	c__Bacilli	o__Lactobacillales	f__Streptococcaceae	g__Streptococcus	s__Streptococcus sp934215455		32642	102	90.42	0.34	gtdb
GCA_934591815.1	d__Bacteria	p__Bacillota_A	c__Clostridia	o__Oscillospirales	f__Oscillospiraceae	g__Vescimonas	s__Vescimonas sp934591815		91880	58	90.62	0.84	gtdb
GCF_002055535.1	d__Bacteria	p__Bacillota	c__Bacilli	o__Lactobacillales	f__Streptococcaceae	g__Streptococcus	s__Streptococcus pyogenes		1914862	1	100	0	gtdb
GCF_900291465.1	d__Bacteria	p__Bacteroidota	c__Bacteroidia	o__Bacteroidales	f__Bacteroidaceae	g__Phocaeicola_A	s__Phocaeicola_A sp900291465		947527	10	97.83	0	gtdb
GCA_019414205.1	d__Bacteria	p__Actinomycetota	c__Coriobacteriia	o__Coriobacteriales	f__Coriobacteriaceae	g__Collinsella	s__Collinsella sp019414205		118062	31	100	0.81	gtdb
GCA_943912555.1	d__Bacteria	p__Bacillota	c__Bacilli	o__Lactobacillales	f__Streptococcaceae	g__Streptococcus	s__Streptococcus sp943912555		13139	190	96.79	0.25	gtdb
GCA_902406135.1	d__Bacteria	p__Bacillota_A	c__Clostridia	o__Lachnospirales	f__Anaerotignaceae	g__Metalachnospira	s__Metalachnospira sp902406135		7069	378	92.03	1.73	gtdb
GCF_003252755.1	d__Bacteria	p__Pseudomonadota	c__Gammaproteobacteria	o__Enterobacterales_A	f__Pasteurellaceae	g__Haemophilus_D	s__Haemophilus_D parainfluenzae_N		245875	28	99.89	0.08	gtdb
GCA_018382125.1	d__Bacteria	p__Actinomycetota	c__Coriobacteriia	o__Coriobacteriales	f__Coriobacteriaceae	g__Collinsella	s__Collinsella sp018382125		54613	52	100	0.81	gtdb
GCA_900551955.1	d__Bacteria	p__Bacillota	c__Bacilli	o__Mycoplasmatales	f__UBA3375	g__UBA3375	s__UBA3375 sp900551955		25465	35	74.55	0	gtdb
GCA_019421365.1	d__Bacteria	p__Bacillota_A	c__Clostridia	o__Lachnospirales	f__Lachnospiraceae	g__Anaerosporobacter	s__Anaerosporobacter sp019421365		84500	75	98.41	2.01	gtdb
GCA_022728415.1	d__Bacteria	p__Actinomycetota	c__Coriobacteriia	o__Coriobacteriales	f__Coriobacteriaceae	g__Collinsella	s__Collinsella sp022728415		5017	990	79.52	5.49	gtdb
GCF_000156375.1	d__Bacteria	p__Desulfobacterota	c__Desulfovibrionia	o__Desulfovibrionales	f__Desulfovibrionaceae	g__Desulfovibrio	s__Desulfovibrio piger		60251	127	99.41	0.59	gtdb
GCA_900544405.1	d__Bacteria	p__Bacillota_A	c__Clostridia	o__Oscillospirales	f__Oscillospiraceae	g__Faecousia	s__Faecousia sp900544405		71112	53	91.72	0	gtdb
GCA_900557165.1	d__Bacteria	p__Bacillota_A	c__Clostridia	o__Peptostreptococcales	f__Peptostreptococcaceae	g__Terrisporobacter	s__Terrisporobacter sp900557165		23110	132	62.07	1.72	gtdb
GCA_934102055.1	d__Bacteria	p__Bacillota	c__Bacilli	o__RF39	f__UBA660	g__UMGS1449	s__UMGS1449 sp934102055		35854	42	89.28	1.12	gtdb
GCA_905208635.1	d__Bacteria	p__Actinomycetota	c__Coriobacteriia	o__Coriobacteriales	f__Coriobacteriaceae	g__Collinsella	s__Collinsella sp905208635		74171	96	100	1.61	gtdb
GCA_900543165.1	d__Bacteria	p__Bacillota_C	c__Negativicutes	o__Veillonellales	f__Dialisteraceae	g__Dialister	s__Dialister sp900543165		34669	99	96.36	0.63	gtdb
GCA_934218695.1	d__Bacteria	p__Pseudomonadota	c__Gammaproteobacteria	o__Enterobacterales_A	f__Succinivibrionaceae	g__Succinivibrio	s__Succinivibrio sp934218695		91932	30	84.12	0.29	gtdb
GCA_905203195.1	d__Bacteria	p__Bacillota_A	c__Clostridia	o__TANB77	f__CAG-508	g__CAG-269	s__CAG-269 sp905203195		5283	276	62.36	2.35	gtdb
GCA_900546435.1	d__Bacteria	p__Bacillota_A	c__Clostridia	o__Lachnospirales	f__Lachnospiraceae	g__Pararoseburia	s__Pararoseburia sp900546435		77091	58	94.52	1.18	gtdb
GCA_900556415.1	d__Bacteria	p__Actinomycetota	c__Coriobacteriia	o__Coriobacteriales	f__Coriobacteriaceae	g__Collinsella	s__Collinsella sp900556415		138273	9	56.9	0	gtdb
GCA_019419625.1	d__Bacteria	p__Actinomycetota	c__Coriobacteriia	o__Coriobacteriales	f__Coriobacteriaceae	g__Collinsella	s__Collinsella sp019419625		24381	149	99.46	0.81	gtdb
GCA_905197665.1	d__Bacteria	p__Actinomycetota	c__Coriobacteriia	o__Coriobacteriales	f__Coriobacteriaceae	g__Collinsella	s__Collinsella sp900556445		97938	39	100	0.81	gtdb
GCA_002438575.1	d__Bacteria	p__Bacillota_A	c__Clostridia	o__Oscillospirales	f__Oscillospiraceae	g__Vescimonas	s__Vescimonas sp002438575		5174	449	72.09	0	gtdb
GCA_900753295.1	d__Bacteria	p__Bacillota_A	c__Clostridia	o__Oscillospirales	f__CAG-272	g__CAG-390	s__CAG-390 sp900753295		14304	196	80.93	1.34	gtdb
GCA_900549085.1	d__Bacteria	p__Actinomycetota	c__Coriobacteriia	o__Coriobacteriales	f__Coriobacteriaceae	g__Collinsella	s__Collinsella sp900549085		25437	111	100	3.37	gtdb
GCF_000381365.1	d__Bacteria	p__Bacteroidota	c__Bacteroidia	o__Bacteroidales	f__Bacteroidaceae	g__Bacteroides	s__Bacteroides salyersiae		556699	21	99.26	0	gtdb
GCA_019414725.1	d__Bacteria	p__Bacteroidota	c__Bacteroidia	o__Bacteroidales	f__Bacteroidaceae	g__Phocaeicola	s__Phocaeicola sp019414725		32999	213	79.85	1.82	gtdb
GCA_019425105.1	d__Bacteria	p__Actinomycetota	c__Actinomycetia	o__Actinomycetales	f__Actinomycetaceae	g__Pauljensenia	s__Pauljensenia sp019425105		8422	377	93.2	1.11	gtdb
GCF_003474435.1	d__Bacteria	p__Bacillota_A	c__Clostridia	o__Lachnospirales	f__Lachnospiraceae	g__Blautia_A	s__Blautia_A sp003474435		71791	144	96.68	0.32	gtdb
GCA_934096985.1	d__Bacteria	p__Bacillota	c__Bacilli	o__RF39	f__UBA660	g__UBA6448	s__UBA6448 sp934096985		224915	7	74.44	0	gtdb
GCA_905210085.1	d__Bacteria	p__Actinomycetota	c__Coriobacteriia	o__Coriobacteriales	f__Coriobacteriaceae	g__Collinsella	s__Collinsella sp905210085		32706	100	95.44	1.16	gtdb
GCA_900752815.1	d__Bacteria	p__Bacteroidota	c__Bacteroidia	o__Bacteroidales	f__Bacteroidaceae	g__Alloprevotella	s__Alloprevotella sp900752815		21619	237	53.62	0.31	gtdb
GCA_000432135.1	d__Bacteria	p__Bacillota_A	c__Clostridia	o__Oscillospirales	f__Oscillospiraceae	g__CAG-170	s__CAG-170 sp000432135		16972	255	91.61	1.68	gtdb
GCA_900768795.1	d__Bacteria	p__Actinomycetota	c__Coriobacteriia	o__Coriobacteriales	f__Coriobacteriaceae	g__Collinsella	s__Collinsella sp900768795		110567	23	96.77	5.24	gtdb
GCA_905214525.1	d__Bacteria	p__Actinomycetota	c__Coriobacteriia	o__Coriobacteriales	f__Coriobacteriaceae	g__Collinsella	s__Collinsella sp905214525		68991	54	100	0.81	gtdb
GCA_002349525.1	d__Bacteria	p__Bacillota_A	c__Clostridia	o__Lachnospirales	f__Lachnospiraceae	g__V9D3004	s__V9D3004 sp002349525		43316	111	96.4	1.01	gtdb
GCA_018373675.1	d__Bacteria	p__Actinomycetota	c__Coriobacteriia	o__Coriobacteriales	f__Coriobacteriaceae	g__Collinsella	s__Collinsella sp018373675		75983	48	100	0.81	gtdb
GCA_905215045.1	d__Bacteria	p__Bacillota_A	c__Clostridia	o__Lachnospirales	f__Lachnospiraceae	g__Anaerostipes	s__Anaerostipes sp905215045		21780	163	59.65	0	gtdb
GCF_003439125.1	d__Bacteria	p__Actinomycetota	c__Coriobacteriia	o__Coriobacteriales	f__Coriobacteriaceae	g__Collinsella	s__Collinsella sp003439125		115322	54	100	0.81	gtdb
GCA_905215245.1	d__Bacteria	p__Pseudomonadota	c__Gammaproteobacteria	o__Enterobacterales_A	f__Pasteurellaceae	g__Haemophilus_D	s__Haemophilus_D sp905215245		9280	279	96.97	0.78	gtdb
GCF_900142015.1	d__Bacteria	p__Bacteroidota	c__Bacteroidia	o__Bacteroidales	f__Bacteroidaceae	g__Bacteroides	s__Bacteroides stercorirosoris		154056	91	99.26	0.5	gtdb
GCF_003478445.1	d__Bacteria	p__Bacillota_A	c__Clostridia	o__Lachnospirales	f__Lachnospiraceae	g__Butyribacter	s__Butyribacter sp003524945		90263	82	95.48	0	gtdb
GCA_934281605.1	d__Bacteria	p__Bacillota_A	c__Clostridia	o__Peptostreptococcales	f__Anaerovoracaceae	g__Lentihominibacter	s__Lentihominibacter sp934281605		204735	17	97.52	0	gtdb
GCA_934394815.1	d__Bacteria	p__Bacillota_A	c__Clostridia	o__Lachnospirales	f__Lachnospiraceae	g__Acetatifactor	s__Acetatifactor sp934394815		46148	89	91.02	2.9	gtdb
GCA_900545015.1	d__Bacteria	p__Bacillota	c__Bacilli	o__RFN20	f__CAG-826	g__Onthovivens	s__Onthovivens sp900545015		42980	69	96.63	1.12	gtdb
GCA_900549405.1	d__Bacteria	p__Bacillota_A	c__Clostridia	o__Oscillospirales	f__Oscillospiraceae	g__Lawsonibacter	s__Lawsonibacter sp900549405		28845	101	90	1.51	gtdb
GCA_900772495.1	d__Bacteria	p__Campylobacterota	c__Campylobacteria	o__Campylobacterales	f__Campylobacteraceae	g__Campylobacter_D	s__Campylobacter_D sp900772495		16106	129	91.14	0.98	gtdb
GCA_900545265.1	d__Bacteria	p__Bacillota_A	c__Clostridia	o__Christensenellales	f__CAG-138	g__RUG472	s__RUG472 sp900545265		83788	36	94.6	0.81	gtdb
GCF_007164725.1	d__Bacteria	p__Bacillota_C	c__Negativicutes	o__Veillonellales	f__Dialisteraceae	g__Dialister	s__Dialister hominis		2407548	1	98.1	0.02	gtdb
GCA_900755095.1	d__Bacteria	p__Bacteroidota	c__Bacteroidia	o__Bacteroidales	f__Bacteroidaceae	g__Bacteroides	s__Bacteroides sp900755095		63063	141	53.02	0.32	gtdb
GCA_000434615.1	d__Bacteria	p__Bacillota_A	c__Clostridia	o__Lachnospirales	f__Lachnospiraceae	g__CAG-510	s__CAG-510 sp000434615		38950	133	97.73	1.55	gtdb
GCA_900768815.1	d__Bacteria	p__Bacillota	c__Bacilli	o__RF39	f__UBA660	g__CAG-877	s__CAG-877 sp900768815		200999	21	94.66	5.62	gtdb
GCA_900313475.1	d__Bacteria	p__Bacillota_A	c__Clostridia	o__Oscillospirales	f__Acutalibacteraceae	g__RUG806	s__RUG806 sp900313475		7720	326	81.53	2.01	gtdb
GCF_007954625.1	d__Bacteria	p__Bacillota	c__Bacilli	o__Lactobacillales	f__Lactobacillaceae	g__Leuconostoc	s__Leuconostoc lactis_A		1635644	4	99.44	0	gtdb
GCF_023336895.1	d__Bacteria	p__Pseudomonadota	c__Gammaproteobacteria	o__Burkholderiales	f__Burkholderiaceae_A	g__Aphodousia	s__Aphodousia secunda_B		257394	44	98.02	1.25	gtdb
GCA_900549805.1	d__Bacteria	p__Bacillota_C	c__Negativicutes	o__Veillonellales	f__Veillonellaceae	g__Veillonella	s__Veillonella sp900549805		21892	94	81.03	0	gtdb
GCA_934667065.1	d__Bacteria	p__Actinomycetota	c__Coriobacteriia	o__Coriobacteriales	f__Coriobacteriaceae	g__Collinsella	s__Collinsella sp934667065		241922	14	95.97	0.81	gtdb
GCF_002208095.1	d__Bacteria	p__Pseudomonadota	c__Gammaproteobacteria	o__Enterobacterales	f__Enterobacteriaceae	g__Enterobacter	s__Enterobacter cloacae_M		5144572	4	99.67	0.7	gtdb
GCA_934501115.1	d__Bacteria	p__Bacillota_A	c__Clostridia	o__Oscillospirales	f__Ruminococcaceae	g__Faecalibacterium	s__Faecalibacterium sp934501115		41415	91	95.44	0	gtdb
GCF_014218705.1	d__Bacteria	p__Pseudomonadota	c__Gammaproteobacteria	o__Enterobacterales	f__Enterobacteriaceae	g__Kluyvera	s__Kluyvera sichuanensis		144979	117	99.69	2.09	gtdb
GCA_902363135.1	d__Bacteria	p__Bacillota_A	c__Clostridia	o__Lachnospirales	f__Lachnospiraceae	g__Choladousia	s__Choladousia sp902363135		227761	64	99.37	0	gtdb
GCF_000211415.1	d__Bacteria	p__Pseudomonadota	c__Gammaproteobacteria	o__Enterobacterales	f__Enterobacteriaceae	g__Enterobacter	s__Enterobacter mori		63070	139	96.76	1.62	gtdb
GCA_900541235.1	d__Bacteria	p__Actinomycetota	c__Coriobacteriia	o__Coriobacteriales	f__Coriobacteriaceae	g__Collinsella	s__Collinsella sp900541235		87934	34	100	0.81	gtdb
GCA_905214105.1	d__Bacteria	p__Actinomycetota	c__Coriobacteriia	o__Coriobacteriales	f__Coriobacteriaceae	g__Collinsella	s__Collinsella sp905214105		211455	39	100	3.68	gtdb
GCA_025146565.1	d__Bacteria	p__Bacteroidota	c__Bacteroidia	o__Bacteroidales	f__Bacteroidaceae	g__Bacteroides	s__Bacteroides eggerthii		4206509	1	99.26	0	gtdb
GCA_900768875.1	d__Bacteria	p__Pseudomonadota	c__Alphaproteobacteria	o__RF32	f__CAG-977	g__UBA2903	s__UBA2903 sp900768875		165210	20	75.87	0.05	gtdb
GCA_900767685.1	d__Bacteria	p__Bacillota_A	c__Clostridia	o__Lachnospirales	f__Lachnospiraceae	g__Coprococcus	s__Coprococcus sp900767685		17360	354	82.38	6.21	gtdb
GCA_000436115.1	d__Bacteria	p__Bacillota_A	c__Clostridia	o__Lachnospirales	f__Lachnospiraceae	g__CAG-95	s__CAG-95 sp000436115		31104	178	95.23	1.76	gtdb
GCA_934675795.1	d__Bacteria	p__Actinomycetota	c__Coriobacteriia	o__Coriobacteriales	f__Coriobacteriaceae	g__Collinsella	s__Collinsella sp934675795		36667	79	78.28	0.81	gtdb
GCA_934102255.1	d__Bacteria	p__Bacillota	c__Bacilli	o__RF39	f__UBA660	g__CAG-605	s__CAG-605 sp934102255		45430	67	87.8	1.69	gtdb
GCF_900461125.1	d__Bacteria	p__Bacillota_A	c__Clostridia	o__Lachnospirales	f__Lachnospiraceae	g__Blautia	s__Blautia coccoides		6097341	2	99.36	0	gtdb
GCA_945867875.1	d__Bacteria	p__Bacillota_A	c__Clostridia	o__Oscillospirales	f__Ruminococcaceae	g__CAG-353	s__CAG-353 sp945867875		11025	282	92	0	gtdb
GCF_009696075.1	d__Bacteria	p__Bacillota	c__Bacilli	o__Erysipelotrichales	f__Erysipelotrichaceae	g__Holdemanella	s__Holdemanella porci		26381	133	97.98	0.67	gtdb
GCA_934320845.1	d__Bacteria	p__Bacillota_A	c__Clostridia	o__Lachnospirales	f__Lachnospiraceae	g__Butyribacter	s__Butyribacter sp934320845		121358	66	96.16	0.22	gtdb
GCA_900547655.1	d__Bacteria	p__Actinomycetota	c__Coriobacteriia	o__Coriobacteriales	f__Coriobacteriaceae	g__Collinsella	s__Collinsella sp900547655		21117	134	98.25	2.42	gtdb
GCF_900475755.1	d__Bacteria	p__Pseudomonadota	c__Gammaproteobacteria	o__Enterobacterales_A	f__Pasteurellaceae	g__Haemophilus	s__Haemophilus influenzae_D		1834484	1	99.66	0.23	gtdb
GCA_900553705.1	d__Bacteria	p__Actinomycetota	c__Coriobacteriia	o__Coriobacteriales	f__Coriobacteriaceae	g__Collinsella	s__Collinsella sp900553705		8267	259	79.67	2.02	gtdb
GCF_002221595.1	d__Bacteria	p__Pseudomonadota	c__Gammaproteobacteria	o__Burkholderiales	f__Burkholderiaceae_A	g__Turicimonas	s__Turicimonas muris		339048	20	98.75	0	gtdb
GCF_003435815.1	d__Bacteria	p__Bacillota_A	c__Clostridia	o__Lachnospirales	f__Lachnospiraceae	g__CAG-317	s__CAG-317 sp000433215		310375	24	95.91	0.19	gtdb
GCA_019425045.1	d__Bacteria	p__Actinomycetota	c__Coriobacteriia	o__Coriobacteriales	f__Coriobacteriaceae	g__Collinsella	s__Collinsella sp019425045		48611	83	99.19	1.61	gtdb
GCA_934630985.1	d__Bacteria	p__Bacillota_A	c__Clostridia	o__Oscillospirales	f__Oscillospiraceae	g__Faecousia	s__Faecousia sp934630985		9777	319	79.62	1.4	gtdb
GCA_900757185.1	d__Bacteria	p__Actinomycetota	c__Coriobacteriia	o__Coriobacteriales	f__Coriobacteriaceae	g__Collinsella	s__Collinsella sp900757185		48468	67	95.97	0.81	gtdb
GCF_900637515.1	d__Bacteria	p__Bacillota_C	c__Negativicutes	o__Veillonellales	f__Veillonellaceae	g__Veillonella	s__Veillonella dispar		2116915	1	100	0	gtdb
GCF_001074635.1	d__Bacteria	p__Bacillota	c__Bacilli	o__Lactobacillales	f__Streptococcaceae	g__Streptococcus	s__Streptococcus mitis_E		20899	250	99.82	0.47	gtdb
GCA_934216375.1	d__Bacteria	p__Bacillota_C	c__Negativicutes	o__Veillonellales	f__Veillonellaceae	g__Veillonella	s__Veillonella sp934216375		6830	293	75.14	2.66	gtdb
GCA_934322085.1	d__Bacteria	p__Bacillota_A	c__Clostridia	o__Lachnospirales	f__Lachnospiraceae	g__Eubacterium_F	s__Eubacterium_F sp934322085		61804	58	95.3	0.06	gtdb
GCA_905209455.1	d__Bacteria	p__Actinomycetota	c__Coriobacteriia	o__Coriobacteriales	f__Coriobacteriaceae	g__Collinsella	s__Collinsella sp905209455		62294	53	100	0.81	gtdb
GCF_011046025.1	d__Bacteria	p__Pseudomonadota	c__Gammaproteobacteria	o__Enterobacterales	f__Enterobacteriaceae	g__Proteus	s__Proteus sp011046025		4293243	4	100	0.54	gtdb
GCA_000508865.1	d__Bacteria	p__Bacillota	c__Bacilli	o__Erysipelotrichales	f__Coprobacillaceae	g__Thomasclavelia	s__Thomasclavelia sp000508865		27842	225	100	0	gtdb
GCA_900764025.1	d__Bacteria	p__Actinomycetota	c__Coriobacteriia	o__Coriobacteriales	f__Coriobacteriaceae	g__Collinsella	s__Collinsella sp900764025		5171	529	83.91	5.54	gtdb
GCA_900545585.1	d__Bacteria	p__Bacillota_A	c__Clostridia	o__Oscillospirales	f__Oscillospiraceae	g__Vescimonas	s__Vescimonas sp900545585		84270	42	93.62	0.67	gtdb
GCA_900541055.1	d__Bacteria	p__Actinomycetota	c__Coriobacteriia	o__Coriobacteriales	f__Coriobacteriaceae	g__Collinsella	s__Collinsella sp900541055		92214	47	100	0.81	gtdb
GCF_002959755.1	d__Bacteria	p__Bacillota_C	c__Negativicutes	o__Veillonellales	f__Veillonellaceae	g__Veillonella	s__Veillonella sp002959755		628292	5	100	0	gtdb
GCF_000953675.1	d__Bacteria	p__Bacillota_A	c__Clostridia	o__Peptostreptococcales	f__Peptostreptococcaceae	g__Paraclostridium	s__Paraclostridium sordellii		1855357	59	100	1.4	gtdb
GCA_900556365.1	d__Bacteria	p__Actinomycetota	c__Coriobacteriia	o__Coriobacteriales	f__Coriobacteriaceae	g__Collinsella	s__Collinsella sp900556365		8807	230	74.28	3.34	gtdb
GCF_009193325.2	d__Bacteria	p__Bacteroidota	c__Bacteroidia	o__Bacteroidales	f__Bacteroidaceae	g__Bacteroides	s__Bacteroides zhangwenhongii		5244518	2	94.5	0.17	gtdb
GCF_001570865.1	d__Bacteria	p__Actinomycetota	c__Actinomycetia	o__Actinomycetales	f__Micrococcaceae	g__Rothia	s__Rothia kristinae		137365	36	98.34	0	gtdb
GCA_934463425.1	d__Bacteria	p__Bacillota_A	c__Clostridia	o__Oscillospirales	f__Ruminococcaceae	g__Ruminococcus_C	s__Ruminococcus_C sp934463425		73308	48	77.81	0.06	gtdb
GCA_934630385.1	d__Bacteria	p__Actinomycetota	c__Coriobacteriia	o__Coriobacteriales	f__Coriobacteriaceae	g__Collinsella	s__Collinsella sp934630385		20592	177	88.19	2.82	gtdb
GCA_900553545.1	d__Bacteria	p__Bacillota_A	c__Clostridia	o__Oscillospirales	f__Oscillospiraceae	g__CAG-170	s__CAG-170 sp900553545		8830	246	75.75	1.14	gtdb
GCA_905197385.1	d__Bacteria	p__Actinomycetota	c__Coriobacteriia	o__Coriobacteriales	f__Coriobacteriaceae	g__Collinsella	s__Collinsella sp905197385		7352	328	89.89	2.42	gtdb
GCA_014858325.1	d__Bacteria	p__Bacillota_A	c__Clostridia	o__Oscillospirales	f__Ruminococcaceae	g__Faecalibacterium	s__Faecalibacterium sp014858325		10096	236	67.32	1.79	gtdb
GCA_905211615.1	d__Bacteria	p__Actinomycetota	c__Coriobacteriia	o__Coriobacteriales	f__Coriobacteriaceae	g__Collinsella	s__Collinsella sp905211615		13133	224	96.37	2.42	gtdb
GCA_900540935.1	d__Bacteria	p__Actinomycetota	c__Coriobacteriia	o__Coriobacteriales	f__Coriobacteriaceae	g__Collinsella	s__Collinsella sp900540935		57583	59	100	0.81	gtdb
GCA_900546075.1	d__Bacteria	p__Bacillota_A	c__Clostridia	o__Oscillospirales	f__Oscillospiraceae	g__Faecousia	s__Faecousia sp900546075		31366	101	94.41	1.01	gtdb
GCA_019414445.1	d__Bacteria	p__Actinomycetota	c__Coriobacteriia	o__Coriobacteriales	f__Coriobacteriaceae	g__Collinsella	s__Collinsella sp019414445		113944	38	100	0.81	gtdb
GCA_900755005.1	d__Bacteria	p__Actinomycetota	c__Coriobacteriia	o__Coriobacteriales	f__Coriobacteriaceae	g__Collinsella	s__Collinsella sp900755005		34146	128	95.16	0.81	gtdb
GCA_934271715.1	d__Bacteria	p__Pseudomonadota	c__Alphaproteobacteria	o__RF32	f__CAG-239	g__RUG410	s__RUG410 sp934271715		110613	20	95.7	0	gtdb
GCA_945865495.1	d__Bacteria	p__Bacillota_A	c__Clostridia	o__Lachnospirales	f__Lachnospiraceae	g__Bacteroides_F	s__Bacteroides_F sp945865495		11236	280	87.91	1.36	gtdb
GCF_019052655.1	d__Bacteria	p__Bacillota	c__Bacilli	o__Erysipelotrichales	f__Erysipelotrichaceae	g__Holdemanella	s__Holdemanella porci_A		30871	201	98.11	1.11	gtdb
GCA_900556255.1	d__Bacteria	p__Bacillota_A	c__Clostridia	o__Oscillospirales	f__Ruminococcaceae	g__Gemmiger	s__Gemmiger sp900556255		6625	256	58.04	0	gtdb
GCA_934693215.1	d__Bacteria	p__Cyanobacteriota	c__Vampirovibrionia	o__Gastranaerophilales	f__Gastranaerophilaceae	g__UMGS1585	s__UMGS1585 sp934693215		10151	225	74.4	0.09	gtdb
GCF_900167205.1	d__Bacteria	p__Bacillota_A	c__Clostridia	o__Oscillospirales	f__Acutalibacteraceae	g__Eubacterium_R	s__Eubacterium_R coprostanoligenes		91496	36	97.99	0	gtdb
GCF_003143995.1	d__Bacteria	p__Actinomycetota	c__Actinomycetia	o__Actinomycetales	f__Micrococcaceae	g__Pseudoglutamicibacter	s__Pseudoglutamicibacter cumminsii_A		149255	32	95.37	0.73	gtdb
GCF_003072625.1	d__Bacteria	p__Bacillota	c__Bacilli	o__Lactobacillales	f__Lactobacillaceae	g__Limosilactobacillus	s__Limosilactobacillus reuteri_D		2044184	1	99.46	0	gtdb
GCA_934229785.1	d__Bacteria	p__Bacillota	c__Bacilli	o__Acholeplasmatales	f__Anaeroplasmataceae	g__Anaeroplasma	s__Anaeroplasma sp934229785		81324	53	90.67	0.11	gtdb
GCA_900541875.1	d__Bacteria	p__Actinomycetota	c__Coriobacteriia	o__Coriobacteriales	f__Coriobacteriaceae	g__Collinsella	s__Collinsella sp900541875		92906	39	99.19	0.81	gtdb
GCA_900549185.1	d__Bacteria	p__Actinomycetota	c__Coriobacteriia	o__Coriobacteriales	f__Coriobacteriaceae	g__Collinsella	s__Collinsella sp900549185		13653	192	91.28	1.69	gtdb
GCA_900546115.1	d__Bacteria	p__Actinomycetota	c__Coriobacteriia	o__Coriobacteriales	f__Coriobacteriaceae	g__Collinsella	s__Collinsella sp900546115		54176	62	97.58	1.69	gtdb
GCA_905215425.1	d__Bacteria	p__Bacillota_A	c__Clostridia	o__Oscillospirales	f__Oscillospiraceae	g__Lawsonibacter	s__Lawsonibacter sp905215425		5155	314	53.76	0	gtdb
GCA_900542125.1	d__Bacteria	p__Actinomycetota	c__Coriobacteriia	o__Coriobacteriales	f__Coriobacteriaceae	g__Collinsella	s__Collinsella sp900542125		34800	101	100	1.08	gtdb
GCF_015560765.1	d__Bacteria	p__Actinomycetota	c__Coriobacteriia	o__Coriobacteriales	f__Coriobacteriaceae	g__Collinsella	s__Collinsella aerofaciens_M		55844	78	100	0.81	gtdb
GCF_001437285.1	d__Bacteria	p__Bacillota	c__Bacilli	o__Lactobacillales	f__Lactobacillaceae	g__Pediococcus	s__Pediococcus pentosaceus		295919	28	99.38	0	gtdb
GCF_015552075.1	d__Bacteria	p__Actinomycetota	c__Coriobacteriia	o__Coriobacteriales	f__Coriobacteriaceae	g__Collinsella	s__Collinsella aerofaciens_Y		33353	126	100	0.81	gtdb
GCF_003458415.1	d__Bacteria	p__Actinomycetota	c__Coriobacteriia	o__Coriobacteriales	f__Coriobacteriaceae	g__Collinsella	s__Collinsella sp003458415		89694	56	100	0.81	gtdb
GCA_902381685.1	d__Bacteria	p__Bacillota_A	c__Clostridia	o__Lachnospirales	f__Lachnospiraceae	g__Faecalimonas	s__Faecalimonas sp000209385		596197	9	98.73	0	gtdb
GCF_003594915.1	d__Bacteria	p__Pseudomonadota	c__Gammaproteobacteria	o__Enterobacterales	f__Enterobacteriaceae	g__Enterobacter	s__Enterobacter chuandaensis		324936	38	99.97	0.04	gtdb
GCF_003252725.1	d__Bacteria	p__Pseudomonadota	c__Gammaproteobacteria	o__Enterobacterales_A	f__Pasteurellaceae	g__Haemophilus_D	s__Haemophilus_D parainfluenzae_L		200727	32	99.89	0.11	gtdb
GCA_003480725.1	d__Bacteria	p__Bacillota_A	c__Clostridia	o__Lachnospirales	f__Lachnospiraceae	g__Choladocola	s__Choladocola sp003480725		378433	26	99.37	0	gtdb
GCF_900129045.1	d__Bacteria	p__Actinomycetota	c__Actinomycetia	o__Actinomycetales	f__Bifidobacteriaceae	g__Bifidobacterium	s__Bifidobacterium merycicum		601313	15	99.77	1.09	gtdb
GCA_900544105.1	d__Bacteria	p__Bacillota_A	c__Clostridia	o__Oscillospirales	f__Oscillospiraceae	g__Dysosmobacter	s__Dysosmobacter sp900544105		23331	123	93.66	0.34	gtdb
GCF_001697145.1	d__Bacteria	p__Bacillota	c__Bacilli	o__Lactobacillales	f__Streptococcaceae	g__Streptococcus	s__Streptococcus anginosus_C		2001352	1	100	0	gtdb
GCA_003343845.1	d__Bacteria	p__Bacillota_A	c__Clostridia	o__Oscillospirales	f__CAG-272	g__UMGS902	s__UMGS902 sp003343845		70466	51	86.13	0	gtdb
GCA_934120045.1	d__Bacteria	p__Bacillota_A	c__Clostridia	o__TANB77	f__CAG-508	g__CAG-269	s__CAG-269 sp934120045		141856	21	70.34	0.34	gtdb
GCF_009696375.1	d__Bacteria	p__Bacillota_A	c__Clostridia	o__Lachnospirales	f__Lachnospiraceae	g__Enterocloster	s__Enterocloster porci		233351	69	99.37	1.41	gtdb
GCA_900549245.1	d__Bacteria	p__Actinomycetota	c__Coriobacteriia	o__Coriobacteriales	f__Coriobacteriaceae	g__Collinsella	s__Collinsella sp900549245		8650	266	91.21	1.73	gtdb
GCA_900762945.1	d__Bacteria	p__Bacillota_A	c__Clostridia	o__Christensenellales	f__Pumilibacteraceae	g__UBA10677	s__UBA10677 sp900762945		6032	374	69.41	0.34	gtdb
GCA_900551385.1	d__Bacteria	p__Bacillota	c__Bacilli	o__RFN20	f__CAG-449	g__CAG-449	s__CAG-449 sp900551385		6168	356	78.12	0.32	gtdb
GCF_000466265.1	d__Bacteria	p__Actinomycetota	c__Actinomycetia	o__Actinomycetales	f__Actinomycetaceae	g__Pauljensenia	s__Pauljensenia sp000466265		16562	293	99.53	0.57	gtdb
GCF_024599655.1	d__Bacteria	p__Pseudomonadota	c__Gammaproteobacteria	o__Enterobacterales	f__Enterobacteriaceae	g__Enterobacter	s__Enterobacter asburiae_D		4838058	1	99.67	0.33	gtdb
GCA_900757495.1	d__Bacteria	p__Actinomycetota	c__Coriobacteriia	o__Coriobacteriales	f__Coriobacteriaceae	g__Collinsella	s__Collinsella sp900757495		134498	29	91.13	0.81	gtdb
GCA_900548935.1	d__Bacteria	p__Actinomycetota	c__Coriobacteriia	o__Coriobacteriales	f__Coriobacteriaceae	g__Collinsella	s__Collinsella sp900548935		10588	242	94.42	2.22	gtdb
GCA_900752285.1	d__Bacteria	p__Bacillota_A	c__Clostridia	o__Oscillospirales	f__Oscillospiraceae	g__Faecousia	s__Faecousia sp900752285		14036	280	70.47	0.67	gtdb
GCF_000024945.1	d__Bacteria	p__Bacillota_C	c__Negativicutes	o__Veillonellales	f__Veillonellaceae	g__Veillonella	s__Veillonella parvula		2132142	1	100	0	gtdb
GCA_902363665.1	d__Bacteria	p__Bacillota_A	c__Clostridia	o__Lachnospirales	f__Lachnospiraceae	g__Choladousia	s__Choladousia sp902363665		188643	76	99.37	0	gtdb
GCA_900552875.1	d__Bacteria	p__Actinomycetota	c__Coriobacteriia	o__Coriobacteriales	f__Coriobacteriaceae	g__Collinsella	s__Collinsella sp900552875		7955	271	80.9	1.88	gtdb
GCA_934643865.1	d__Bacteria	p__Verrucomicrobiota	c__Kiritimatiellia	o__RFP12	f__UBA1067	g__RUG572	s__RUG572 sp934643865		42900	122	90.88	0.84	gtdb
GCA_934148985.1	d__Bacteria	p__Bacillota_A	c__Clostridia	o__TANB77	f__CAG-508	g__CAG-269	s__CAG-269 sp934148985		34379	68	69.04	1.01	gtdb
GCF_001347015.1	d__Bacteria	p__Bacillota	c__Bacilli	o__Lactobacillales	f__Streptococcaceae	g__Streptococcus	s__Streptococcus pneumoniae_E		186978	33	99.81	0.21	gtdb
GCA_900552135.1	d__Bacteria	p__Bacillota_A	c__Clostridia	o__TANB77	f__CAG-508	g__CAG-245	s__CAG-245 sp900552135		135501	24	77.67	0.67	gtdb
GCF_900604335.1	d__Bacteria	p__Bacillota_A	c__Clostridia	o__Oscillospirales	f__Butyricicoccaceae	g__Butyricicoccus	s__Butyricicoccus sp900604335		1542917	11	98.66	1.01	gtdb
GCA_022713905.1	d__Bacteria	p__Actinomycetota	c__Coriobacteriia	o__Coriobacteriales	f__Coriobacteriaceae	g__Collinsella	s__Collinsella sp022713905		10070	459	96.51	4.75	gtdb
GCA_900539195.1	d__Bacteria	p__Bacillota_A	c__Clostridia	o__Oscillospirales	f__Ruminococcaceae	g__Ruminiclostridium_E	s__Ruminiclostridium_E sp900539195		59020	60	98.32	0	gtdb
GCF_000012545.1	d__Archaea	p__Methanobacteriota	c__Methanobacteria	o__Methanobacteriales	f__Methanobacteriaceae	g__Methanosphaera	s__Methanosphaera stadtmanae		1767403	1	97.6	0	gtdb
GCF_001579045.1	d__Bacteria	p__Bacillota	c__Bacilli	o__Lactobacillales	f__Streptococcaceae	g__Streptococcus	s__Streptococcus mitis_D		90738	72	99.6	0.2	gtdb
GCA_902363805.1	d__Bacteria	p__Bacillota_A	c__Clostridia	o__Lachnospirales	f__Lachnospiraceae	g__Eubacterium_G	s__Eubacterium_G sp000434315		673876	15	100	0.67	gtdb
GCA_900557355.1	d__Bacteria	p__Bacteroidota	c__Bacteroidia	o__Bacteroidales	f__Bacteroidaceae	g__Bacteroides	s__Bacteroides sp900557355		9113	991	51.72	0	gtdb
GCA_934646185.1	d__Bacteria	p__Bacillota_A	c__Clostridia	o__Oscillospirales	f__Oscillospiraceae	g__CAG-170	s__CAG-170 sp934646185		71909	79	94.63	2.75	gtdb
GCA_934525845.1	d__Bacteria	p__Bacillota_A	c__Clostridia	o__Oscillospirales	f__Ruminococcaceae	g__Faecalibacterium	s__Faecalibacterium sp934525845		54195	77	96.82	0.06	gtdb
GCF_003472385.1	d__Bacteria	p__Pseudomonadota	c__Gammaproteobacteria	o__Burkholderiales	f__Burkholderiaceae_A	g__Duodenibacillus	s__Duodenibacillus intestinigallinarum		245749	36	98.75	0.62	gtdb
GCA_900545225.1	d__Bacteria	p__Bacillota_A	c__Clostridia	o__Lachnospirales	f__Lachnospiraceae	g__UBA4285	s__UBA4285 sp900545225		113813	21	90.72	0	gtdb
GCA_934661375.1	d__Bacteria	p__Verrucomicrobiota	c__Lentisphaeria	o__Victivallales	f__UBA1829	g__UBA11452	s__UBA11452 sp934661375		81305	63	92.57	2.03	gtdb
GCF_000733755.1	d__Bacteria	p__Bacillota_A	c__Clostridia	o__Lachnospirales	f__Lachnospiraceae	g__Lachnoclostridium	s__Lachnoclostridium phytofermentans_A		618663	9	99.11	2.68	gtdb
GCA_900556785.1	d__Bacteria	p__Bacillota_C	c__Negativicutes	o__Veillonellales	f__Veillonellaceae	g__Veillonella	s__Veillonella sp900556785		24560	107	55.17	0	gtdb
GCF_009496165.1	d__Bacteria	p__Bacillota	c__Bacilli	o__Lactobacillales	f__Streptococcaceae	g__Streptococcus	s__Streptococcus mitis_BM		226222	18	99.82	0.6	gtdb
GCA_900548565.1	d__Bacteria	p__Actinomycetota	c__Coriobacteriia	o__Coriobacteriales	f__Coriobacteriaceae	g__Collinsella	s__Collinsella sp900548565		12554	220	90.81	1.34	gtdb
GCA_934444735.1	d__Bacteria	p__Bacillota_A	c__Clostridia	o__UBA1381	f__UBA1381	g__CAKSFT01	s__CAKSFT01 sp934444735		125311	37	96.64	0.17	gtdb
GCF_900604355.1	d__Bacteria	p__Bacillota_A	c__Clostridia	o__Lachnospirales	f__Lachnospiraceae	g__Luxibacter	s__Luxibacter massiliensis		3785526	3	99.42	0.23	gtdb
GCA_900551715.1	d__Bacteria	p__Bacillota_A	c__Clostridia	o__Lachnospirales	f__Lachnospiraceae	g__Blautia_A	s__Blautia_A sp900551715		29926	129	93.02	3.48	gtdb
GCF_016901675.1	d__Bacteria	p__Bacillota	c__Bacilli	o__Lactobacillales	f__Lactobacillaceae	g__Limosilactobacillus	s__Limosilactobacillus coleohominis		19211	240	99.45	0.55	gtdb
GCA_000435475.1	d__Bacteria	p__Actinomycetota	c__Coriobacteriia	o__Coriobacteriales	f__Eggerthellaceae	g__Anaerotardibacter	s__Anaerotardibacter sp000435475		23199	231	98.39	0	gtdb
GCA_934754925.1	d__Bacteria	p__Bacillota_A	c__Clostridia	o__Clostridiales	f__Clostridiaceae	g__Clostridium	s__Clostridium sp934754925		55631	122	97.58	1.94	gtdb
GCA_900542635.1	d__Bacteria	p__Actinomycetota	c__Coriobacteriia	o__Coriobacteriales	f__Coriobacteriaceae	g__Collinsella	s__Collinsella sp900542635		33920	93	97.87	0.81	gtdb
GCF_009193295.2	d__Bacteria	p__Bacteroidota	c__Bacteroidia	o__Bacteroidales	f__Bacteroidaceae	g__Bacteroides	s__Bacteroides luhongzhouii		5760088	1	99.35	0.81	gtdb
GCF_003201875.1	d__Bacteria	p__Bacillota_A	c__Clostridia	o__Lachnospirales	f__Lachnospiraceae	g__Hungatella	s__Hungatella effluvii		267308	53	99.37	1.74	gtdb
GCF_004166885.1	d__Bacteria	p__Bacillota	c__Bacilli	o__Lactobacillales	f__Streptococcaceae	g__Streptococcus	s__Streptococcus sp004166885		610109	7	100	0	gtdb
GCA_934101275.1	d__Bacteria	p__Bacillota	c__Bacilli	o__RF39	f__UBA660	g__Ventrenecus	s__Ventrenecus sp934101275		29684	57	78.91	3.93	gtdb
GCA_900551235.1	d__Bacteria	p__Bacillota_A	c__Clostridia	o__Lachnospirales	f__Lachnospiraceae	g__Hominisplanchenecus	s__Hominisplanchenecus sp900551235		37921	90	91.77	2.91	gtdb
GCA_000432735.1	d__Bacteria	p__Bacteroidota	c__Bacteroidia	o__Bacteroidales	f__Bacteroidaceae	g__Phocaeicola	s__Phocaeicola sp000432735		39862	160	97.99	0.19	gtdb
GCF_009834925.2	d__Bacteria	p__Actinomycetota	c__Coriobacteriia	o__Coriobacteriales	f__Eggerthellaceae	g__Eggerthella	s__Eggerthella guodeyinii		4175177	1	100	0.81	gtdb
GCA_018364455.1	d__Bacteria	p__Bacillota	c__Bacilli	o__Lactobacillales	f__Streptococcaceae	g__Streptococcus	s__Streptococcus mitis_BR		42334	84	99.67	1.78	gtdb
GCA_900545005.1	d__Bacteria	p__Bacillota	c__Bacilli	o__RF39	f__UBA660	g__CAG-605	s__CAG-605 sp900545005		77622	25	91.01	0	gtdb
GCF_024295625.1	d__Bacteria	p__Bacillota	c__Bacilli	o__Lactobacillales	f__Streptococcaceae	g__Streptococcus	s__Streptococcus sp024295625		606460	13	100	0	gtdb
GCA_934561735.1	d__Bacteria	p__Bacillota_A	c__Clostridia	o__Oscillospirales	f__Acutalibacteraceae	g__Eubacterium_R	s__Eubacterium_R sp934561735		276262	17	98.66	0	gtdb
GCA_019414645.1	d__Bacteria	p__Actinomycetota	c__Coriobacteriia	o__Coriobacteriales	f__Coriobacteriaceae	g__Collinsella	s__Collinsella sp019414645		56871	68	99.19	0.81	gtdb
GCA_934589705.1	d__Bacteria	p__Bacillota_A	c__Clostridia	o__Oscillospirales	f__Oscillospiraceae	g__Faecousia	s__Faecousia sp934589705		93651	47	92.86	0.04	gtdb
GCF_000735365.1	d__Bacteria	p__Pseudomonadota	c__Gammaproteobacteria	o__Enterobacterales	f__Enterobacteriaceae	g__Kluyvera	s__Kluyvera ascorbata		34727	253	99.28	0.59	gtdb
GCA_000432895.1	d__Bacteria	p__Bacillota	c__Bacilli	o__RFN20	f__CAG-449	g__CAG-449	s__CAG-449 sp000432895		8167	424	95.51	0	gtdb
GCA_934351445.1	d__Bacteria	p__Bacillota_A	c__Clostridia	o__Lachnospirales	f__Lachnospiraceae	g__W0P33-017	s__W0P33-017 sp934351445		52127	60	87.5	0.74	gtdb
GCA_934098515.1	d__Bacteria	p__Bacillota	c__Bacilli	o__RF39	f__UBA660	g__CAG-533	s__CAG-533 sp934098515		65109	25	91.57	1.12	gtdb
GCF_001854545.1	d__Bacteria	p__Campylobacterota	c__Campylobacteria	o__Campylobacterales	f__Helicobacteraceae	g__Helicobacter_B	s__Helicobacter_B sp001854545		55740	87	97.17	0.35	gtdb
GCF_023347275.1	d__Bacteria	p__Bacillota_A	c__Clostridia	o__Oscillospirales	f__Ruminococcaceae	g__Faecalibacterium	s__Faecalibacterium sp900758465		2816187	1	99.32	0	gtdb
GCA_900553205.1	d__Bacteria	p__Cyanobacteriota	c__Vampirovibrionia	o__Gastranaerophilales	f__Gastranaerophilaceae	g__UMGS1585	s__UMGS1585 sp900553205		10855	243	83.62	2.56	gtdb
GCF_000187505.1	d__Bacteria	p__Bacillota	c__Bacilli	o__Lactobacillales	f__Streptococcaceae	g__Streptococcus	s__Streptococcus parasanguinis_M		51074	81	99.62	0	gtdb
GCF_002000985.1	d__Bacteria	p__Bacillota	c__Bacilli	o__Lactobacillales	f__Streptococcaceae	g__Streptococcus	s__Streptococcus gallolyticus		2492900	1	100	0.37	gtdb
GCF_900243745.1	d__Bacteria	p__Desulfobacterota	c__Desulfovibrionia	o__Desulfovibrionales	f__Desulfovibrionaceae	g__Desulfovibrio	s__Desulfovibrio sp900243745		3416440	1	99.41	0.59	gtdb
GCA_016939855.1	d__Bacteria	p__Pseudomonadota	c__Gammaproteobacteria	o__Enterobacterales	f__Enterobacteriaceae	g__Kluyvera	s__Kluyvera ascorbata_C		9458	521	50.2	0	gtdb
GCA_900541475.1	d__Bacteria	p__Actinomycetota	c__Coriobacteriia	o__Coriobacteriales	f__Coriobacteriaceae	g__Collinsella	s__Collinsella sp900541475		39448	79	100	0.9	gtdb
GCA_934513685.1	d__Bacteria	p__Bacillota_A	c__Clostridia	o__Oscillospirales	f__Ruminococcaceae	g__SFJ001	s__SFJ001 sp934513685		73828	47	98.64	0.02	gtdb
GCF_003287455.1	d__Bacteria	p__Bacillota_A	c__Clostridia	o__Oscillospirales	f__Ruminococcaceae	g__Faecalibacterium	s__Faecalibacterium hattorii		126007	54	100	0	gtdb
GCA_900549345.1	d__Bacteria	p__Actinomycetota	c__Coriobacteriia	o__Coriobacteriales	f__Coriobacteriaceae	g__Collinsella	s__Collinsella sp900549345		21956	123	94.49	2.42	gtdb
GCA_019419555.1	d__Bacteria	p__Actinomycetota	c__Coriobacteriia	o__Coriobacteriales	f__Coriobacteriaceae	g__Collinsella	s__Collinsella sp019419555		43897	66	100	1.61	gtdb
GCF_000250875.1	d__Bacteria	p__Pseudomonadota	c__Gammaproteobacteria	o__Burkholderiales	f__Burkholderiaceae_A	g__Sutterella	s__Sutterella parvirubra		10755	391	94.88	1.55	gtdb
GCF_016648925.1	d__Bacteria	p__Bacillota	c__Bacilli	o__Lactobacillales	f__Streptococcaceae	g__Streptococcus	s__Streptococcus sp900766505		79692	50	100	0.07	gtdb
GCF_003182075.1	d__Bacteria	p__Bacillota_A	c__Clostridia	o__Tissierellales	f__Peptoniphilaceae	g__Finegoldia	s__Finegoldia magna		66727	73	99.39	0.97	gtdb
GCA_008671135.1	d__Bacteria	p__Actinomycetota	c__Coriobacteriia	o__Coriobacteriales	f__Coriobacteriaceae	g__Collinsella	s__Collinsella aerofaciens_J		61464	50	100	0.81	gtdb
GCA_004553495.1	d__Bacteria	p__Bacillota_A	c__Clostridia	o__Oscillospirales	f__Oscillospiraceae	g__F23-B02	s__F23-B02 sp004553495		46168	56	79.64	0	gtdb
GCA_934277545.1	d__Bacteria	p__Pseudomonadota	c__Alphaproteobacteria	o__RF32	f__CAG-239	g__RUG410	s__RUG410 sp934277545		182272	22	94.62	1.08	gtdb
GCA_934132805.1	d__Bacteria	p__Bacillota_A	c__Clostridia	o__TANB77	f__CAG-508	g__CAG-269	s__CAG-269 sp934132805		27764	73	69.45	0.67	gtdb
GCA_905216175.1	d__Bacteria	p__Actinomycetota	c__Coriobacteriia	o__Coriobacteriales	f__Coriobacteriaceae	g__Collinsella	s__Collinsella sp905216175		17391	168	95.56	3.63	gtdb
GCA_016466735.1	d__Bacteria	p__Bacillota	c__Bacilli	o__Lactobacillales	f__Lactobacillaceae	g__Weissella	s__Weissella confusa_B		109612	55	99.08	1.23	gtdb
GCA_900545915.1	d__Bacteria	p__Bacteroidota	c__Bacteroidia	o__Bacteroidales	f__Coprobacteraceae	g__Coprobacter	s__Coprobacter sp900545915		78727	78	93.19	0.75	gtdb
GCA_900547835.1	d__Bacteria	p__Actinomycetota	c__Coriobacteriia	o__Coriobacteriales	f__Coriobacteriaceae	g__Collinsella	s__Collinsella sp900547835		11149	238	89.92	0.81	gtdb
GCF_001813675.1	d__Bacteria	p__Bacillota	c__Bacilli	o__Lactobacillales	f__Streptococcaceae	g__Streptococcus	s__Streptococcus sp001813675		56570	82	100	0.24	gtdb
GCF_001025195.1	d__Bacteria	p__Actinomycetota	c__Actinomycetia	o__Actinomycetales	f__Bifidobacteriaceae	g__Bifidobacterium	s__Bifidobacterium catenulatum		2079525	1	100	0	gtdb
GCF_000497205.1	d__Bacteria	p__Actinomycetota	c__Actinomycetia	o__Mycobacteriales	f__Pseudonocardiaceae	g__Saccharopolyspora	s__Saccharopolyspora rectivirgula		52597	182	99.38	1.24	gtdb
GCF_009914335.1	d__Bacteria	p__Pseudomonadota	c__Gammaproteobacteria	o__Enterobacterales	f__Enterobacteriaceae	g__Proteus	s__Proteus sp003144505		4114477	1	100	0.54	gtdb
GCA_900548255.1	d__Bacteria	p__Actinomycetota	c__Coriobacteriia	o__Coriobacteriales	f__Coriobacteriaceae	g__Collinsella	s__Collinsella sp900548255		23758	126	92.74	1.61	gtdb
GCF_009494135.1	d__Bacteria	p__Bacteroidota	c__Bacteroidia	o__Bacteroidales	f__Bacteroidaceae	g__Prevotella	s__Prevotella copri_B		13054	419	98.64	3.7	gtdb
GCF_018784445.1	d__Bacteria	p__Bacillota_A	c__Clostridia	o__Oscillospirales	f__Ruminococcaceae	g__Gemmiger	s__Gemmiger sp900540775		120750	132	97.28	0	gtdb
GCF_011008565.1	d__Bacteria	p__Bacillota	c__Bacilli	o__Bacillales	f__Bacillaceae_C	g__Weizmannia	s__Weizmannia ginsengihumi		99347	63	93.78	0	gtdb
GCA_934561115.1	d__Bacteria	p__Bacillota_A	c__Clostridia	o__Oscillospirales	f__Ruminococcaceae	g__Faecalibacterium	s__Faecalibacterium sp934561115		54378	94	83.08	0	gtdb
GCF_900447045.1	d__Bacteria	p__Bacillota_A	c__Clostridia	o__Clostridiales	f__Clostridiaceae	g__Clostridium	s__Clostridium paraputrificum		975231	20	99.19	0.18	gtdb
GCA_905204225.1	d__Bacteria	p__Bacillota	c__Bacilli	o__RFN20	f__CAG-449	g__CAG-449	s__CAG-449 sp905204225		15003	154	89.33	0	gtdb
GCA_900321895.1	d__Bacteria	p__Cyanobacteriota	c__Vampirovibrionia	o__Gastranaerophilales	f__Gastranaerophilaceae	g__Scatousia	s__Scatousia sp900321895		9289	216	83.43	1.03	gtdb
GCA_934525405.1	d__Bacteria	p__Bacillota_A	c__Clostridia	o__Oscillospirales	f__Ruminococcaceae	g__Faecalibacterium	s__Faecalibacterium sp934525405		17205	216	91.15	2.04	gtdb
GCF_020091405.1	d__Bacteria	p__Bacteroidota	c__Bacteroidia	o__Bacteroidales	f__Bacteroidaceae	g__Bacteroides	s__Bacteroides sp900552405		6935738	1	99.25	0.19	gtdb
GCA_934130975.1	d__Bacteria	p__Bacillota_A	c__Clostridia	o__TANB77	f__CAG-508	g__CAG-269	s__CAG-269 sp934130975		78381	38	76.44	1.34	gtdb
GCA_019417795.1	d__Bacteria	p__Bacillota_A	c__Clostridia	o__Oscillospirales	f__Oscillospiraceae	g__Dysosmobacter	s__Dysosmobacter sp019417795		5468	984	61.2	1.34	gtdb
GCA_019414545.1	d__Bacteria	p__Actinomycetota	c__Coriobacteriia	o__Coriobacteriales	f__Coriobacteriaceae	g__Collinsella	s__Collinsella sp019414545		21976	160	98.92	0.81	gtdb
GCA_900541135.1	d__Bacteria	p__Actinomycetota	c__Coriobacteriia	o__Coriobacteriales	f__Coriobacteriaceae	g__Collinsella	s__Collinsella sp900541135		54349	61	100	0.81	gtdb
GCA_900756575.1	d__Bacteria	p__Bacillota_A	c__Clostridia	o__Oscillospirales	f__Oscillospiraceae	g__HGM13006	s__HGM13006 sp900756575		27330	195	97.59	2.85	gtdb
GCA_934370915.1	d__Bacteria	p__Bacillota_A	c__Clostridia	o__Lachnospirales	f__Lachnospiraceae	g__Copromonas	s__Copromonas sp934370915		11213	349	91.03	1.27	gtdb
GCF_005844325.1	d__Bacteria	p__Actinomycetota	c__Coriobacteriia	o__Coriobacteriales	f__Coriobacteriaceae	g__Collinsella	s__Collinsella aerofaciens_G		65309	64	100	0.81	gtdb
GCA_019119995.1	d__Bacteria	p__Bacillota_A	c__Clostridia	o__Lachnospirales	f__Lachnospiraceae	g__Mediterraneibacter	s__Mediterraneibacter faecavium		70015	66	89.73	4.33	gtdb
GCA_934526125.1	d__Bacteria	p__Bacillota_A	c__Clostridia	o__Oscillospirales	f__Ruminococcaceae	g__Faecalibacterium	s__Faecalibacterium sp934526125		22626	133	86.54	0.68	gtdb
GCF_900021155.1	d__Bacteria	p__Bacteroidota	c__Bacteroidia	o__Bacteroidales	f__Rikenellaceae	g__Alistipes	s__Alistipes excrementavium		75637	109	99.04	0.48	gtdb
GCA_900541495.1	d__Bacteria	p__Bacillota_A	c__Clostridia	o__Oscillospirales	f__Ruminococcaceae	g__UMGS363	s__UMGS363 sp900541495		37390	96	96.28	0.19	gtdb
GCA_900757595.1	d__Bacteria	p__Actinomycetota	c__Coriobacteriia	o__Coriobacteriales	f__Coriobacteriaceae	g__Collinsella	s__Collinsella sp900757595		50486	67	94.35	1.61	gtdb
GCA_905215505.1	d__Bacteria	p__Actinomycetota	c__Coriobacteriia	o__Coriobacteriales	f__Coriobacteriaceae	g__Collinsella	s__Collinsella sp905215505		76835	47	100	2.62	gtdb
GCF_013300825.1	d__Bacteria	p__Bacillota_A	c__Clostridia	o__Lachnospirales	f__Lachnospiraceae	g__Blautia_A	s__Blautia_A wexlerae_B		98623	121	99.37	0	gtdb
GCA_900541675.1	d__Bacteria	p__Actinomycetota	c__Coriobacteriia	o__Coriobacteriales	f__Coriobacteriaceae	g__Collinsella	s__Collinsella sp900541675		52856	52	99.19	0.81	gtdb
GCF_014207605.1	d__Bacteria	p__Bacillota_C	c__Negativicutes	o__Veillonellales	f__Negativicoccaceae	g__Negativicoccus	s__Negativicoccus succinicivorans		271727	13	97.22	0.63	gtdb
GCA_900544615.1	d__Bacteria	p__Bacillota_A	c__Clostridia	o__Oscillospirales	f__Oscillospiraceae	g__Dysosmobacter	s__Dysosmobacter sp900544615		99567	42	96.64	1.01	gtdb
GCA_900543215.1	d__Bacteria	p__Bacillota_A	c__Clostridia	o__Oscillospirales	f__Acutalibacteraceae	g__UBA737	s__UBA737 sp900543215		52324	53	93.29	0	gtdb
GCF_000210095.1	d__Bacteria	p__Bacillota_A	c__Clostridia	o__Oscillospirales	f__Ruminococcaceae	g__Ruminococcus_F	s__Ruminococcus_F champanellensis		94004	92	97.82	0	gtdb
GCA_900315735.1	d__Bacteria	p__Bacillota_A	c__Clostridia	o__Lachnospirales	f__Lachnospiraceae	g__RUG115	s__RUG115 sp900315735		98216	53	96.86	0.74	gtdb
GCF_003434055.1	d__Bacteria	p__Bacillota_A	c__Clostridia	o__Lachnospirales	f__Lachnospiraceae	g__Enterocloster	s__Enterocloster aldenensis		236844	95	99.37	0	gtdb
GCA_900540875.1	d__Bacteria	p__Actinomycetota	c__Coriobacteriia	o__Coriobacteriales	f__Coriobacteriaceae	g__Collinsella	s__Collinsella sp900540875		71799	40	100	0.81	gtdb
GCF_013304385.1	d__Bacteria	p__Bacillota_A	c__Clostridia	o__Lachnospirales	f__Lachnospiraceae	g__Blautia_A	s__Blautia_A sp900066505		66766	176	99.37	0.63	gtdb
GCF_001881565.1	d__Bacteria	p__Bacillota_A	c__Clostridia	o__Lachnospirales	f__Lachnospiraceae	g__Eisenbergiella	s__Eisenbergiella tayi		165104	95	98.85	3.74	gtdb
GCA_022732315.1	d__Bacteria	p__Bacteroidota	c__Bacteroidia	o__Bacteroidales	f__Bacteroidaceae	g__Prevotella	s__Prevotella sp022732315		9835	629	72.72	2.73	gtdb
GCF_000160575.1	d__Bacteria	p__Bacillota	c__Bacilli	o__Lactobacillales	f__Lactobacillaceae	g__Weissella	s__Weissella paramesenteroides		106888	36	99.39	0	gtdb
GCA_900550705.1	d__Bacteria	p__Bacillota_A	c__Clostridia	o__Oscillospirales	f__Oscillospiraceae	g__Lawsonibacter	s__Lawsonibacter sp900550705		10321	217	91.48	2.58	gtdb
GCA_900552935.1	d__Bacteria	p__Actinomycetota	c__Coriobacteriia	o__Coriobacteriales	f__Atopobiaceae	g__Parolsenella	s__Parolsenella sp900552935		28060	82	71.52	0	gtdb
GCA_927911595.1	d__Bacteria	p__Pseudomonadota	c__Gammaproteobacteria	o__Enterobacterales_A	f__Pasteurellaceae	g__Haemophilus_D	s__Haemophilus_D sp927911595		9165	226	89.25	1.59	gtdb
GCA_900767195.1	d__Bacteria	p__Bacillota_A	c__Clostridia	o__Christensenellales	f__Borkfalkiaceae	g__UBA7597	s__UBA7597 sp900767195		22263	153	94.35	1.61	gtdb
GCA_934481385.1	d__Bacteria	p__Bacillota_A	c__Clostridia	o__Oscillospirales	f__Ruminococcaceae	g__Ruminococcus	s__Ruminococcus sp934481385		141592	42	97.76	0	gtdb
GCA_905210545.1	d__Bacteria	p__Bacillota_A	c__Clostridia	o__Christensenellales	f__Borkfalkiaceae	g__UBA1259	s__UBA1259 sp905210545		24545	85	90.52	1.61	gtdb
GCF_003460605.1	d__Bacteria	p__Bacillota_A	c__Clostridia	o__Lachnospirales	f__Lachnospiraceae	g__Blautia_A	s__Blautia_A sp900066145		218554	72	99.37	0	gtdb
GCA_000431795.1	d__Bacteria	p__Bacillota	c__Bacilli	o__RF39	f__UBA660	g__CAG-302	s__CAG-302 sp000431795		49835	55	92.42	1.12	gtdb
GCF_001061665.1	d__Bacteria	p__Actinomycetota	c__Actinomycetia	o__Actinomycetales	f__Micrococcaceae	g__Rothia	s__Rothia mucilaginosa_A		204474	22	99.11	0	gtdb
GCA_900546495.1	d__Bacteria	p__Bacillota_A	c__Clostridia	o__Lachnospirales	f__Lachnospiraceae	g__Eubacterium_I	s__Eubacterium_I sp900546495		48395	87	95.55	1.44	gtdb
GCA_019424965.1	d__Bacteria	p__Actinomycetota	c__Coriobacteriia	o__Coriobacteriales	f__Coriobacteriaceae	g__Collinsella	s__Collinsella sp019424965		37865	95	100	0.81	gtdb
GCA_900555675.1	d__Bacteria	p__Patescibacteria	c__Saccharimonadia	o__Saccharimonadales	f__Nanosynbacteraceae	g__Nanosynbacter	s__Nanosynbacter sp900555675		19853	40	60.68	0	gtdb
GCA_900765235.1	d__Bacteria	p__Bacillota_C	c__Negativicutes	o__Veillonellales	f__Veillonellaceae	g__Veillonella	s__Veillonella sp900765235		5824	307	63.28	0	gtdb
GCA_905214435.1	d__Bacteria	p__Actinomycetota	c__Coriobacteriia	o__Coriobacteriales	f__Coriobacteriaceae	g__Collinsella	s__Collinsella sp905214435		32148	106	98.75	0.81	gtdb
GCA_900767675.1	d__Bacteria	p__Actinomycetota	c__Coriobacteriia	o__Coriobacteriales	f__Coriobacteriaceae	g__Collinsella	s__Collinsella sp900767675		103946	50	94.84	2.42	gtdb
GCF_001096185.1	d__Bacteria	p__Bacillota	c__Bacilli	o__Lactobacillales	f__Streptococcaceae	g__Streptococcus	s__Streptococcus pneumoniae_B		163740	24	99.42	0.2	gtdb
GCA_934271735.1	d__Bacteria	p__Bacillota_A	c__Clostridia	o__Christensenellales	f__Borkfalkiaceae	g__UBA10281	s__UBA10281 sp934271735		104978	43	93.95	1.61	gtdb
GCA_014305285.1	d__Bacteria	p__Campylobacterota	c__Campylobacteria	o__Campylobacterales	f__Campylobacteraceae	g__Campylobacter_D	s__Campylobacter_D jejuni_D		106825	74	95.92	0	gtdb
GCF_001688725.2	d__Bacteria	p__Bacteroidota	c__Bacteroidia	o__Bacteroidales	f__Bacteroidaceae	g__Bacteroides	s__Bacteroides caecimuris		4839927	1	88.92	0.73	gtdb
GCA_934654775.1	d__Bacteria	p__Actinomycetota	c__Coriobacteriia	o__Coriobacteriales	f__Coriobacteriaceae	g__Collinsella	s__Collinsella sp934654775		149576	25	90.32	0.81	gtdb
GCA_900761525.1	d__Bacteria	p__Cyanobacteriota	c__Vampirovibrionia	o__Gastranaerophilales	f__Gastranaerophilaceae	g__UMGS1477	s__UMGS1477 sp900761525		21139	116	79.49	0	gtdb
GCA_000182945.1	d__Bacteria	p__Fusobacteriota	c__Fusobacteriia	o__Fusobacteriales	f__Fusobacteriaceae	g__Fusobacterium	s__Fusobacterium vincentii		14248	302	94.92	1.12	gtdb
GCA_934525735.1	d__Bacteria	p__Bacillota_A	c__Clostridia	o__Oscillospirales	f__Ruminococcaceae	g__Faecalibacterium	s__Faecalibacterium sp934525735		21298	138	82.12	1.36	gtdb
GCA_020735665.1	d__Bacteria	p__Bacillota_A	c__Clostridia	o__Lachnospirales	f__Lachnospiraceae	g__Coprococcus	s__Coprococcus sp000154245		2960832	1	99.33	0	gtdb
GCF_002096845.1	d__Bacteria	p__Bacillota	c__Bacilli	o__Lactobacillales	f__Streptococcaceae	g__Streptococcus	s__Streptococcus mitis_A		96595	62	99.82	0.2	gtdb
GCA_002437735.1	d__Bacteria	p__Bacillota_A	c__Clostridia	o__Oscillospirales	f__Oscillospiraceae	g__ER4	s__ER4 sp002437735		12961	201	78.34	0	gtdb
GCA_934589525.1	d__Bacteria	p__Bacillota_A	c__Clostridia	o__Oscillospirales	f__Oscillospiraceae	g__Faecousia	s__Faecousia sp934589525		70385	57	92.73	0.34	gtdb
GCF_015594605.1	d__Bacteria	p__Bacillota	c__Bacilli	o__Lactobacillales	f__Streptococcaceae	g__Streptococcus	s__Streptococcus sp015594605		86705	39	100	0.37	gtdb
GCA_905221215.1	d__Bacteria	p__Bacillota	c__Bacilli	o__Lactobacillales	f__Streptococcaceae	g__Streptococcus	s__Streptococcus sp905221215		181650	137	99.78	0.66	gtdb
GCA_019419485.1	d__Bacteria	p__Actinomycetota	c__Coriobacteriia	o__Coriobacteriales	f__Coriobacteriaceae	g__Collinsella	s__Collinsella sp019419485		5827	532	90.82	1.61	gtdb
GCF_003991565.1	d__Bacteria	p__Bacteroidota	c__Bacteroidia	o__Bacteroidales	f__Marinifilaceae	g__Butyricimonas	s__Butyricimonas faecalis		4925405	2	99.46	0	gtdb
GCA_019114495.1	d__Bacteria	p__Bacillota_A	c__Clostridia	o__Lachnospirales	f__Lachnospiraceae	g__Blautia	s__Blautia stercoravium		16293	219	94.95	0	gtdb
GCA_900543615.1	d__Bacteria	p__Actinomycetota	c__Coriobacteriia	o__Coriobacteriales	f__Coriobacteriaceae	g__Collinsella	s__Collinsella sp900543615		16606	167	96.77	0.81	gtdb
GCA_003481775.1	d__Bacteria	p__Bacillota	c__Bacilli	o__Erysipelotrichales	f__Erysipelotrichaceae	g__Clostridium_AQ	s__Clostridium_AQ sp003481775		80307	170	100	0.13	gtdb
GCA_900545205.1	d__Bacteria	p__Bacillota_C	c__Negativicutes	o__Veillonellales	f__Veillonellaceae	g__Veillonella	s__Veillonella sp900545205		21850	126	95.88	1.02	gtdb
GCA_004554395.1	d__Bacteria	p__Myxococcota	c__Bradymonadia	o__UBA4248	f__UBA4248	g__UBA4248	s__UBA4248 sp004554395		20315	224	77.1	1.77	gtdb
GCF_016648855.1	d__Bacteria	p__Bacillota	c__Bacilli	o__Lactobacillales	f__Streptococcaceae	g__Streptococcus	s__Streptococcus parasanguinis_L		101144	28	100	0.35	gtdb
GCA_934573855.1	d__Bacteria	p__Bacillota_A	c__Clostridia	o__Oscillospirales	f__Oscillospiraceae	g__Limivicinus	s__Limivicinus sp934573855		184346	19	87.56	0	gtdb
GCA_019414465.1	d__Bacteria	p__Actinomycetota	c__Coriobacteriia	o__Coriobacteriales	f__Coriobacteriaceae	g__Collinsella	s__Collinsella sp019414465		13085	233	93.68	1.61	gtdb
GCF_003462685.1	d__Bacteria	p__Actinomycetota	c__Coriobacteriia	o__Coriobacteriales	f__Coriobacteriaceae	g__Collinsella	s__Collinsella sp003462685		96357	55	100	0.81	gtdb
GCF_002736145.1	d__Bacteria	p__Actinomycetota	c__Coriobacteriia	o__Coriobacteriales	f__Coriobacteriaceae	g__Collinsella	s__Collinsella aerofaciens_A		2306349	1	100	0.81	gtdb
GCA_934668695.1	d__Bacteria	p__Actinomycetota	c__Coriobacteriia	o__Coriobacteriales	f__Coriobacteriaceae	g__Collinsella	s__Collinsella sp934668695		72876	45	80.65	2.42	gtdb
GCA_900546315.1	d__Bacteria	p__Bacillota_A	c__Clostridia	o__Oscillospirales	f__CAG-272	g__Flemingibacterium	s__Flemingibacterium sp900546315		24850	175	91.25	0.5	gtdb
GCF_000026225.1	d__Bacteria	p__Pseudomonadota	c__Gammaproteobacteria	o__Enterobacterales	f__Enterobacteriaceae	g__Escherichia	s__Escherichia fergusonii		4588711	2	99.9	0.04	gtdb
GCA_934358495.1	d__Bacteria	p__Bacillota_A	c__Clostridia	o__Lachnospirales	f__Lachnospiraceae	g__Eubacterium_I	s__Eubacterium_I sp934358495		27226	159	91.21	1.15	gtdb
GCA_002474405.1	d__Bacteria	p__Bacillota_A	c__Clostridia	o__Christensenellales	f__Borkfalkiaceae	g__UBA7597	s__UBA7597 sp002474405		15138	226	86.39	1.21	gtdb
GCA_905215065.1	d__Bacteria	p__Actinomycetota	c__Coriobacteriia	o__Coriobacteriales	f__Coriobacteriaceae	g__Collinsella	s__Collinsella sp905215065		128363	32	99.19	0.81	gtdb
GCA_934630735.1	d__Bacteria	p__Actinomycetota	c__Coriobacteriia	o__Coriobacteriales	f__Coriobacteriaceae	g__Collinsella	s__Collinsella sp934630735		52838	84	87.9	1.61	gtdb
GCA_900548535.1	d__Bacteria	p__Bacteroidota	c__Bacteroidia	o__Bacteroidales	f__Bacteroidaceae	g__Prevotella	s__Prevotella sp900548535		32287	139	91.67	1.52	gtdb
GCA_004556705.1	d__Bacteria	p__Bacillota_A	c__Clostridia	o__Oscillospirales	f__Acutalibacteraceae	g__Fimenecus	s__Fimenecus sp004556705		44483	101	97.32	0	gtdb
GCA_905215275.1	d__Bacteria	p__Actinomycetota	c__Coriobacteriia	o__Coriobacteriales	f__Coriobacteriaceae	g__Collinsella	s__Collinsella sp905215275		9557	300	94.38	3.54	gtdb
GCA_900314535.1	d__Bacteria	p__Actinomycetota	c__Coriobacteriia	o__Coriobacteriales	f__Atopobiaceae	g__UBA7748	s__UBA7748 sp900314535		52308	88	99.19	0.81	gtdb
GCF_000307225.1	d__Bacteria	p__Bacillota_A	c__Clostridia	o__Tissierellales	f__Peptoniphilaceae	g__Anaerococcus	s__Anaerococcus vaginalis_B		64715	93	95.81	0.3	gtdb
GCF_020736365.1	d__Bacteria	p__Bacillota_A	c__Clostridia	o__Lachnospirales	f__Lachnospiraceae	g__Clostridium_Q	s__Clostridium_Q saccharolyticum_A		3891914	2	100	0	gtdb
GCA_900547315.1	d__Bacteria	p__Bacillota_A	c__Clostridia	o__Oscillospirales	f__Oscillospiraceae	g__Limivicinus	s__Limivicinus sp900547315		24214	122	90.27	0.67	gtdb
GCA_003534295.1	d__Bacteria	p__Bacillota_A	c__Clostridia	o__TANB77	f__CAG-508	g__CAG-273	s__CAG-273 sp003534295		99488	25	79.47	2.45	gtdb
GCF_008727815.1	d__Bacteria	p__Bacillota	c__Bacilli	o__Lactobacillales	f__Streptococcaceae	g__Streptococcus	s__Streptococcus sp008727815		2133380	1	100	0.07	gtdb
GCF_003458715.1	d__Bacteria	p__Bacillota	c__Bacilli	o__Erysipelotrichales	f__Erysipelotrichaceae	g__Holdemanella	s__Holdemanella sp003458715		78326	84	98.11	1.25	gtdb
GCA_900552755.1	d__Bacteria	p__Actinomycetota	c__Coriobacteriia	o__Coriobacteriales	f__Coriobacteriaceae	g__Collinsella	s__Collinsella sp900552755		13994	204	90.59	3.71	gtdb
GCF_900411395.1	d__Bacteria	p__Bacillota	c__Bacilli	o__Lactobacillales	f__Streptococcaceae	g__Streptococcus	s__Streptococcus mitis_BA		159605	54	99.82	0.2	gtdb
47660_4#172_clean_bin.1.orig_cleaned	d__Bacteria	p__Bacillota	c__Bacilli	o__Lactobacillales	f__Streptococcaceae	g__Streptococcus	s__g__Streptococcus__47660_4#172_clean_bin.1.orig_cleaned	47660_4#172	28,211	109	90.07	1.29	chain
47542_1#140_clean_bin.14.orig_cleaned	d__Bacteria	p__Actinomycetota	c__Coriobacteriia	o__Coriobacteriales	f__Coriobacteriaceae	g__Collinsella	s__g__Collinsella__47542_1#140_clean_bin.14.orig_cleaned	47542_1#140	68,378	56	99.74	0.95	chain
40054_2#62_bin.14.orig_clean	d__Bacteria	p__Actinomycetota	c__Coriobacteriia	o__Coriobacteriales	f__Coriobacteriaceae	g__Collinsella	s__g__Collinsella__40054_2#62_bin.14.orig_clean	40054_2#62	141831	27	99.68	1.06	chain
47542_1#14_clean_bin.1.orig_cleaned	d__Bacteria	p__Bacteroidota	c__Bacteroidia	o__Bacteroidales	f__Tannerellaceae	g__Parabacteroides	s__g__Parabacteroides__47542_1#14_clean_bin.1.orig_cleaned	47542_1#14	85,854	94	92.31	1.84	chain
40054_2#167_bin.2.strict_clean	d__Bacteria	p__Actinomycetota	c__Coriobacteriia	o__Coriobacteriales	f__Coriobacteriaceae	g__Collinsella	s__g__Collinsella__40054_2#167_bin.2.strict_clean	40054_2#167	130253	28	99.79	1.36	chain
40054_2#165_bin.15.strict_clean	d__Bacteria	p__Bacillota_A	c__Clostridia	o__Lachnospirales	f__Lachnospiraceae	g__Copromonas	s__g__Copromonas__40054_2#165_bin.15.strict_clean	40054_2#165	36615	122	93.89	0.31	chain
39907_2#111_bin.9.strict_clean	d__Bacteria	p__Actinomycetota	c__Actinomycetia	o__Actinomycetales	f__Actinomycetaceae	g__Pauljensenia	s__g__Pauljensenia__39907_2#111_bin.9.strict_clean	39907_2#111	16171	208	93.98	0.57	chain
39907_1#65_bin.26.strict_clean	d__Bacteria	p__Actinomycetota	c__Coriobacteriia	o__Coriobacteriales	f__Coriobacteriaceae	g__Collinsella	s__g__Collinsella__39907_1#65_bin.26.strict_clean	39907_1#65	116686	38	99.95	0.43	chain
38222_8#8_bin.7.permissive_clean	d__Bacteria	p__Actinomycetota	c__Coriobacteriia	o__Coriobacteriales	f__Coriobacteriaceae	g__Collinsella	s__g__Collinsella__38222_8#8_bin.7.permissive_clean	38222_8#8	121695	43	99.52	0.12	chain
47660_4#143_clean_bin.1.strict_cleaned	d__Bacteria	p__Bacillota	c__Bacilli	o__Lactobacillales	f__Streptococcaceae	g__Streptococcus	s__g__Streptococcus__47660_4#143_clean_bin.1.strict_cleaned	47660_4#143	30,205	113	94.6	3.52	chain
39923_1#7_bin.20.permissive_clean	d__Bacteria	p__Patescibacteria	c__Saccharimonadia	o__Saccharimonadales	f__Nanogingivalaceae	g__Nanogingivalis	s__g__Nanogingivalis__39923_1#7_bin.20.permissive_clean	39923_1#7	346574	9	99.09	0.02	chain
47542_1#115_clean_bin.16.strict_cleaned	d__Bacteria	p__Actinomycetota	c__Coriobacteriia	o__Coriobacteriales	f__Coriobacteriaceae	g__Collinsella	s__g__Collinsella__47542_1#115_clean_bin.16.strict_cleaned	47542_1#115	43,629	92	98.02	0.88	chain
47542_1#134_clean_bin.1.permissive_cleaned	d__Bacteria	p__Cyanobacteriota	c__Vampirovibrionia	o__Gastranaerophilales	f__Gastranaerophilaceae	g__Avigastranaerophilus	s__g__Avigastranaerophilus__47542_1#134_clean_bin.1.permissive_cleaned	47542_1#134	88,922	43	92.49	0.57	chain
40054_2#65_bin.12.strict_clean	d__Bacteria	p__Actinomycetota	c__Coriobacteriia	o__Coriobacteriales	f__Coriobacteriaceae	g__Collinsella	s__g__Collinsella__40054_2#65_bin.12.strict_clean	40054_2#65	205811	26	99.9	0.57	chain
47660_4#153_clean_bin.2.orig_cleaned	d__Bacteria	p__Actinomycetota	c__Coriobacteriia	o__Coriobacteriales	f__Coriobacteriaceae	g__Collinsella	s__g__Collinsella__47660_4#153_clean_bin.2.orig_cleaned	47660_4#153	131,306	36	99.83	0.5	chain
47660_4#177_clean_bin.24.orig_cleaned	d__Bacteria	p__Actinomycetota	c__Actinomycetia	o__Actinomycetales	f__Actinomycetaceae	g__Pauljensenia	s__g__Pauljensenia__47660_4#177_clean_bin.24.orig_cleaned	47660_4#177	30,785	126	99.96	0.59	chain
47542_1#126_clean_bin.1.orig_cleaned	d__Bacteria	p__Actinomycetota	c__Coriobacteriia	o__Coriobacteriales	f__Coriobacteriaceae	g__Collinsella	s__g__Collinsella__47542_1#126_clean_bin.1.orig_cleaned	47542_1#126	50,006	56	99.17	0.29	chain
39907_2#115_bin.10.strict_clean	d__Bacteria	p__Bacillota_C	c__Negativicutes	o__Veillonellales	f__Veillonellaceae	g__Veillonella_A	s__g__Veillonella_A__39907_2#115_bin.10.strict_clean	39907_2#115	49814	61	91.32	0.26	chain
38353_3#12_bin.15.strict_clean	d__Bacteria	p__Pseudomonadota	c__Alphaproteobacteria	o__UBA3830	f__	g__	s__o__UBA3830__38353_3#12_bin.15.strict_clean	38353_3#12	399698	8	95.34	0.01	chain
47660_4#28_clean_bin.18.orig_cleaned	d__Bacteria	p__Bacillota_C	c__Negativicutes	o__Veillonellales	f__Veillonellaceae	g__Veillonella	s__g__Veillonella__47660_4#28_clean_bin.18.orig_cleaned	47660_4#28	95,769	46	100	0	chain
47660_4#31_clean_bin.2.strict_cleaned	d__Bacteria	p__Pseudomonadota	c__Gammaproteobacteria	o__Burkholderiales	f__Burkholderiaceae_A	g__Sutterella	s__g__Sutterella__47660_4#31_clean_bin.2.strict_cleaned	47660_4#31	29,722	248	95.48	2.33	chain
38353_3#32_bin.13.permissive_clean	d__Bacteria	p__Bacillota_A	c__Clostridia	o__Lachnospirales	f__Lachnospiraceae	g__Anaerostipes	s__g__Anaerostipes__38353_3#32_bin.13.permissive_clean	38353_3#32	62725	85	99.15	0.59	chain
38353_3#25_bin.6.permissive_clean	d__Bacteria	p__Bacillota_A	c__Clostridia	o__Lachnospirales	f__Lachnospiraceae	g__RUG11200	s__g__RUG11200__38353_3#25_bin.6.permissive_clean	38353_3#25	103677	71	94.42	1.3	chain
39907_1#61_bin.25.orig_clean	d__Bacteria	p__Pseudomonadota	c__Gammaproteobacteria	o__Burkholderiales	f__Neisseriaceae	g__Neisseria	s__g__Neisseria__39907_1#61_bin.25.orig_clean	39907_1#61	45207	72	100	0.22	chain
39923_2#3_bin.21.strict_clean	d__Bacteria	p__Actinomycetota	c__Coriobacteriia	o__Coriobacteriales	f__Coriobacteriaceae	g__Collinsella	s__g__Collinsella__39923_2#3_bin.21.strict_clean	39923_2#3	165558	20	99.02	0.61	chain
40054_2#180_bin.31.strict_clean	d__Bacteria	p__Actinomycetota	c__Coriobacteriia	o__Coriobacteriales	f__Coriobacteriaceae	g__Collinsella	s__g__Collinsella__40054_2#180_bin.31.strict_clean	40054_2#180	87509	56	99.7	1.43	chain
39923_2#166_bin.30.strict_clean	d__Bacteria	p__Actinomycetota	c__Actinomycetia	o__Actinomycetales	f__Bifidobacteriaceae	g__Bifidobacterium	s__g__Bifidobacterium__39923_2#166_bin.30.strict_clean	39923_2#166	159600	32	99.24	1.03	chain
47660_4#6_clean_bin.3.strict_cleaned	d__Bacteria	p__Actinomycetota	c__Coriobacteriia	o__Coriobacteriales	f__Coriobacteriaceae	g__Collinsella	s__g__Collinsella__47660_4#6_clean_bin.3.strict_cleaned	47660_4#6	160,559	30	99.95	0.26	chain
39907_1#1_bin.10.strict_clean	d__Bacteria	p__Pseudomonadota	c__Gammaproteobacteria	o__Burkholderiales	f__Burkholderiaceae_A	g__Aphodousia	s__g__Aphodousia__39907_1#1_bin.10.strict_clean	39907_1#1	39828	69	97.31	0.59	chain
47660_4#176_clean_bin.2.permissive_cleaned	d__Bacteria	p__Actinomycetota	c__Coriobacteriia	o__Coriobacteriales	f__Coriobacteriaceae	g__Collinsella	s__g__Collinsella__47660_4#176_clean_bin.2.permissive_cleaned	47660_4#176	90,240	60	99.67	0.88	chain
47542_1#107_clean_bin.9.orig_cleaned	d__Bacteria	p__Actinomycetota	c__Coriobacteriia	o__Coriobacteriales	f__Coriobacteriaceae	g__Collinsella	s__g__Collinsella__47542_1#107_clean_bin.9.orig_cleaned	47542_1#107	33,216	111	93.55	0.21	chain
39907_1#60_bin.14.orig_clean	d__Bacteria	p__Actinomycetota	c__Coriobacteriia	o__Coriobacteriales	f__Coriobacteriaceae	g__Collinsella	s__g__Collinsella__39907_1#60_bin.14.orig_clean	39907_1#60	31245	96	98.72	0.55	chain
39923_2#170_bin.14.orig_clean	d__Bacteria	p__Bacillota_A	c__Clostridia	o__Lachnospirales	f__Lachnospiraceae	g__Hungatella_A	s__g__Hungatella_A__39923_2#170_bin.14.orig_clean	39923_2#170	111975	37	94.1	0	chain
47680_3#41_clean_bin.22.strict_cleaned	d__Bacteria	p__Actinomycetota	c__Coriobacteriia	o__Coriobacteriales	f__Coriobacteriaceae	g__Collinsella	s__g__Collinsella__47680_3#41_clean_bin.22.strict_cleaned	47680_3#41	164,072	28	99.62	0.61	chain
47660_4#128_clean_bin.22.orig_cleaned	d__Bacteria	p__Actinomycetota	c__Actinomycetia	o__Actinomycetales	f__Bifidobacteriaceae	g__Bifidobacterium	s__g__Bifidobacterium__47660_4#128_clean_bin.22.orig_cleaned	47660_4#128	89,298	47	91.69	3.23	chain
40054_2#68_bin.13.strict_clean	d__Bacteria	p__Actinomycetota	c__Coriobacteriia	o__Coriobacteriales	f__Coriobacteriaceae	g__Collinsella	s__g__Collinsella__40054_2#68_bin.13.strict_clean	40054_2#68	82578	40	99.8	0.51	chain
39923_4#82_bin.12.permissive_clean	d__Bacteria	p__Actinomycetota	c__Coriobacteriia	o__Coriobacteriales	f__Coriobacteriaceae	g__Collinsella	s__g__Collinsella__39923_4#82_bin.12.permissive_clean	39923_4#82	149237	27	99.67	0.83	chain
39907_1#38_bin.10.orig_clean	d__Bacteria	p__Actinomycetota	c__Coriobacteriia	o__Coriobacteriales	f__Coriobacteriaceae	g__Collinsella	s__g__Collinsella__39907_1#38_bin.10.orig_clean	39907_1#38	20406	147	91.85	1.29	chain
47660_4#43_clean_bin.14.permissive_cleaned	d__Bacteria	p__Actinomycetota	c__Coriobacteriia	o__Coriobacteriales	f__Coriobacteriaceae	g__Collinsella	s__g__Collinsella__47660_4#43_clean_bin.14.permissive_cleaned	47660_4#43	187,534	27	99.16	0.53	chain
38353_3#19_bin.15.permissive_clean	d__Bacteria	p__Actinomycetota	c__Coriobacteriia	o__Coriobacteriales	f__Coriobacteriaceae	g__Collinsella	s__g__Collinsella__38353_3#19_bin.15.permissive_clean	38353_3#19	246500	48	98.18	0.44	chain
47680_3#12_clean_bin.3.orig_cleaned	d__Bacteria	p__Actinomycetota	c__Coriobacteriia	o__Coriobacteriales	f__Coriobacteriaceae	g__Collinsella	s__g__Collinsella__47680_3#12_clean_bin.3.orig_cleaned	47680_3#12	165,720	22	99.41	0.35	chain
47660_4#145_clean_bin.15.strict_cleaned	d__Bacteria	p__Actinomycetota	c__Coriobacteriia	o__Coriobacteriales	f__Coriobacteriaceae	g__Collinsella	s__g__Collinsella__47660_4#145_clean_bin.15.strict_cleaned	47660_4#145	35,019	93	97.76	0.49	chain
38353_3#32_bin.10.orig_clean	d__Bacteria	p__Pseudomonadota	c__Gammaproteobacteria	o__Enterobacterales_A	f__Pasteurellaceae	g__Haemophilus_D	s__g__Haemophilus_D__38353_3#32_bin.10.orig_clean	38353_3#32	14886	175	90.68	1.52	chain
40054_3#181_bin.16.permissive_clean	d__Bacteria	p__Patescibacteria	c__Saccharimonadia	o__Saccharimonadales	f__Nanoperiomorbaceae	g__Nanoperiomorbus	s__g__Nanoperiomorbus__40054_3#181_bin.16.permissive_clean	40054_3#181	207969	7	98.33	0.03	chain
39923_2#158_bin.13.orig_clean	d__Bacteria	p__Pseudomonadota	c__Gammaproteobacteria	o__Enterobacterales_A	f__Pasteurellaceae	g__Haemophilus_D	s__g__Haemophilus_D__39923_2#158_bin.13.orig_clean	39923_2#158	100885	30	100	0.01	chain
39907_1#64_bin.33.strict_clean	d__Bacteria	p__Actinomycetota	c__Coriobacteriia	o__Coriobacteriales	f__Coriobacteriaceae	g__Collinsella	s__g__Collinsella__39907_1#64_bin.33.strict_clean	39907_1#64	148298	33	99.93	0.85	chain
47542_1#96_clean_bin.34.strict_cleaned	d__Bacteria	p__Actinomycetota	c__Coriobacteriia	o__Coriobacteriales	f__Coriobacteriaceae	g__Collinsella	s__g__Collinsella__47542_1#96_clean_bin.34.strict_cleaned	47542_1#96	81,083	48	95.41	0.47	chain
38222_6#6_bin.15.strict_clean	d__Bacteria	p__Actinomycetota	c__Coriobacteriia	o__Coriobacteriales	f__Coriobacteriaceae	g__Collinsella	s__g__Collinsella__38222_6#6_bin.15.strict_clean	38222_6#6	88372	50	91.24	1	chain
40054_2#58_bin.13.orig_clean	d__Bacteria	p__Actinomycetota	c__Coriobacteriia	o__Coriobacteriales	f__Coriobacteriaceae	g__Collinsella	s__g__Collinsella__40054_2#58_bin.13.orig_clean	40054_2#58	135024	36	99.94	0.38	chain
39923_4#52_bin.1.strict_clean	d__Bacteria	p__Actinomycetota	c__Coriobacteriia	o__Coriobacteriales	f__Coriobacteriaceae	g__Collinsella	s__g__Collinsella__39923_4#52_bin.1.strict_clean	39923_4#52	205647	20	99.96	0.21	chain
47660_4#118_clean_bin.21.strict_cleaned	d__Bacteria	p__Actinomycetota	c__Coriobacteriia	o__Coriobacteriales	f__Coriobacteriaceae	g__Collinsella	s__g__Collinsella__47660_4#118_clean_bin.21.strict_cleaned	47660_4#118	113,314	42	99.94	0.39	chain
38222_6#10_bin.6.orig_clean	d__Bacteria	p__Pseudomonadota	c__Gammaproteobacteria	o__Burkholderiales	f__Burkholderiaceae_A	g__Duodenibacillus	s__g__Duodenibacillus__38222_6#10_bin.6.orig_clean	38222_6#10	65211	41	99.05	0.65	chain
39923_4#67_bin.8.orig_clean	d__Bacteria	p__Actinomycetota	c__Coriobacteriia	o__Coriobacteriales	f__Coriobacteriaceae	g__Collinsella	s__g__Collinsella__39923_4#67_bin.8.orig_clean	39923_4#67	37774	96	91.11	0.47	chain
47542_1#106_clean_bin.19.orig_cleaned	d__Bacteria	p__Actinomycetota	c__Coriobacteriia	o__Coriobacteriales	f__Coriobacteriaceae	g__Collinsella	s__g__Collinsella__47542_1#106_clean_bin.19.orig_cleaned	47542_1#106	140,877	31	99.98	0.98	chain
47680_3#18_clean_bin.12.orig_cleaned	d__Bacteria	p__Bacteroidota	c__Bacteroidia	o__Bacteroidales	f__Tannerellaceae	g__Parabacteroides	s__g__Parabacteroides__47680_3#18_clean_bin.12.orig_cleaned	47680_3#18	26,200	261	91.29	2.23	chain
39923_4#184_bin.7.orig_clean	d__Bacteria	p__Actinomycetota	c__Coriobacteriia	o__Coriobacteriales	f__Coriobacteriaceae	g__Collinsella	s__g__Collinsella__39923_4#184_bin.7.orig_clean	39923_4#184	123859	28	99.66	1.05	chain
47542_1#102_clean_bin.2.strict_cleaned	d__Bacteria	p__Actinomycetota	c__Coriobacteriia	o__Coriobacteriales	f__Coriobacteriaceae	g__Collinsella	s__g__Collinsella__47542_1#102_clean_bin.2.strict_cleaned	47542_1#102	42,330	95	94.49	1.43	chain
47680_3#24_clean_bin.21.permissive_cleaned	d__Bacteria	p__Bacillota_A	c__Clostridia	o__Lachnospirales	f__CAG-274	g__	s__f__CAG-274__47680_3#24_clean_bin.21.permissive_cleaned	47680_3#24	43,731	59	96.6	0.45	chain
47542_1#10_clean_bin.4.strict_cleaned	d__Bacteria	p__Pseudomonadota	c__Gammaproteobacteria	o__Enterobacterales_A	f__Pasteurellaceae	g__Haemophilus_D	s__Haemophilus_D parainfluenzae	47542_1#10	551,672	14	100	0	chain
47660_4#15_clean_bin.31.orig_cleaned	d__Bacteria	p__Bacteroidota	c__Bacteroidia	o__Bacteroidales	f__Bacteroidaceae	g__Phocaeicola	s__Phocaeicola vulgatus	47660_4#15	121,433	64	100	0	chain
47660_4#141_clean_bin.41.strict_cleaned	d__Bacteria	p__Pseudomonadota	c__Gammaproteobacteria	o__Enterobacterales	f__Enterobacteriaceae	g__Escherichia	s__Escherichia coli	47660_4#141	83,688	95	100	0	chain
47680_3#28_clean_bin.19.orig_cleaned	d__Bacteria	p__Bacillota	c__Bacilli	o__Lactobacillales	f__Streptococcaceae	g__Streptococcus	s__Streptococcus sp000187445	47680_3#28	180,419	21	100	0	chain
47660_4#135_clean_bin.8.permissive_cleaned	d__Bacteria	p__Bacillota_C	c__Negativicutes	o__Veillonellales	f__Megasphaeraceae	g__Megasphaera	s__Megasphaera elsdenii_A	47660_4#135	76,305	56	100	0	chain
39923_4#50_bin.10.strict_clean	d__Bacteria	p__Bacillota_A	c__Clostridia	o__Lachnospirales	f__Lachnospiraceae	g__Eubacterium_F	s__Eubacterium_F sp003491505	39923_4#50	89753	66	100	0	chain
40054_4#40_bin.19.strict_clean	d__Bacteria	p__Pseudomonadota	c__Gammaproteobacteria	o__Enterobacterales_A	f__Pasteurellaceae	g__Haemophilus_D	s__Haemophilus_D parainfluenzae_K	40054_4#40	295288	11	100	0	chain
40054_2#176_bin.33.permissive_clean	d__Bacteria	p__Bacillota_A	c__Clostridia	o__Oscillospirales	f__Oscillospiraceae	g__Vescimonas	s__Vescimonas coprocola	40054_2#176	115553	41	100	0	chain
39923_2#168_bin.24.strict_clean	d__Bacteria	p__Pseudomonadota	c__Gammaproteobacteria	o__Burkholderiales	f__Burkholderiaceae_B	g__Comamonas	s__Comamonas kerstersii	39923_2#168	66737	76	100	0	chain
39923_4#44_bin.3.orig_clean	d__Bacteria	p__Bacillota	c__Bacilli	o__Lactobacillales	f__Streptococcaceae	g__Streptococcus	s__Streptococcus sp934229725	39923_4#44	116738	28	99.99	0	chain
47542_1#6_clean_bin.7.permissive_cleaned	d__Bacteria	p__Bacillota_C	c__Negativicutes	o__Veillonellales	f__Veillonellaceae	g__Veillonella	s__Veillonella sp934230905	47542_1#6	160,768	33	99.99	0	chain
47660_4#156_clean_bin.23.orig_cleaned	d__Bacteria	p__Bacillota_C	c__Negativicutes	o__Selenomonadales	f__Selenomonadaceae	g__Mitsuokella	s__Mitsuokella multacida	47660_4#156	220,428	23	99.99	0	chain
47660_4#169_clean_bin.28.orig_cleaned	d__Bacteria	p__Campylobacterota	c__Campylobacteria	o__Campylobacterales	f__Helicobacteraceae	g__Helicobacter_D	s__Helicobacter_D pullorum	47660_4#169	64,235	49	99.99	0	chain
39907_3#88_bin.18.orig_clean	d__Bacteria	p__Bacillota_A	c__Clostridia	o__Lachnospirales	f__Lachnospiraceae	g__Mediterraneibacter	s__Mediterraneibacter faecis	39907_3#88	85242	66	99.99	0	chain
39923_2#164_bin.14.permissive_clean	d__Bacteria	p__Bacillota_C	c__Negativicutes	o__Veillonellales	f__Megasphaeraceae	g__Megasphaera	s__Megasphaera massiliensis	39923_2#164	288941	19	99.99	0	chain
38353_5#27_bin.9.permissive_clean	d__Bacteria	p__Bacillota_C	c__Negativicutes	o__Veillonellales	f__Megasphaeraceae	g__Megasphaera	s__Megasphaera sp000417505	38353_5#27	91284	49	99.99	0	chain
39923_3#178_bin.4.orig_clean	d__Bacteria	p__Bacillota	c__Bacilli	o__Lactobacillales	f__Lactobacillaceae	g__Lactobacillus	s__Lactobacillus paragasseri	39923_3#178	125388	25	99.99	0	chain
38222_6#9_bin.9.permissive_clean	d__Bacteria	p__Bacillota	c__Bacilli	o__Lactobacillales	f__Lactobacillaceae	g__Ligilactobacillus	s__Ligilactobacillus salivarius	38222_6#9	287608	16	99.99	0	chain
39923_3#1_bin.17.strict_clean	d__Bacteria	p__Bacillota	c__Bacilli	o__Lactobacillales	f__Lactobacillaceae	g__Limosilactobacillus	s__Limosilactobacillus fermentum	39923_3#1	66147	63	99.98	0	chain
38222_6#14_bin.13.permissive_clean	d__Bacteria	p__Bacillota_C	c__Negativicutes	o__Veillonellales	f__Megasphaeraceae	g__Megasphaera	s__Megasphaera elsdenii	38222_6#14	102650	35	99.98	0	chain
38353_8#26_bin.17.strict_clean	d__Bacteria	p__Bacillota_A	c__Clostridia	o__Lachnospirales	f__Lachnospiraceae	g__Agathobacter	s__Agathobacter rectalis	38353_8#26	373595	31	99.98	0	chain
47660_4#142_clean_bin.37.strict_cleaned	d__Bacteria	p__Bacillota_A	c__Clostridia	o__Oscillospirales	f__Acutalibacteraceae	g__Ruminococcus_E	s__Ruminococcus_E sp934476515	47660_4#142	108,365	52	99.97	0	chain
39923_2#158_bin.12.strict_clean	d__Bacteria	p__Bacillota	c__Bacilli	o__Lactobacillales	f__Streptococcaceae	g__Streptococcus	s__Streptococcus sp934196125	39923_2#158	35653	93	99.96	0	chain
47542_1#189_clean_bin.12.orig_cleaned	d__Bacteria	p__Bacillota_A	c__Clostridia	o__Lachnospirales	f__Lachnospiraceae	g__Mediterraneibacter	s__Mediterraneibacter lactaris	47542_1#189	51,198	73	99.96	0	chain
38354_8#31_bin.3.orig_clean	d__Bacteria	p__Bacillota_C	c__Negativicutes	o__Veillonellales	f__Megasphaeraceae	g__Megasphaera	s__Megasphaera sp001546855	38354_8#31	120635	33	99.96	0	chain
39907_2#175_bin.2.permissive_clean	d__Bacteria	p__Pseudomonadota	c__Gammaproteobacteria	o__Enterobacterales_A	f__Pasteurellaceae	g__Haemophilus	s__Haemophilus influenzae	39907_2#175	81564	36	100	0.01	chain
39923_1#7_bin.2.orig_clean	d__Bacteria	p__Pseudomonadota	c__Gammaproteobacteria	o__Enterobacterales_A	f__Pasteurellaceae	g__Haemophilus_A	s__Haemophilus_A parahaemolyticus_A	39923_1#7	218366	16	100	0.01	chain
39923_3#40_bin.12.orig_clean	d__Bacteria	p__Pseudomonadota	c__Gammaproteobacteria	o__Enterobacterales_A	f__Pasteurellaceae	g__Haemophilus	s__Haemophilus seminalis	39923_3#40	477377	11	100	0.01	chain
39923_4#52_bin.7.strict_clean	d__Bacteria	p__Bacillota	c__Bacilli	o__Bacillales	f__Bacillaceae_C	g__Weizmannia	s__Weizmannia coagulans	39923_4#52	94687	55	99.95	0	chain
47660_4#168_clean_bin.21.strict_cleaned	d__Bacteria	p__Bacillota_A	c__Clostridia	o__Lachnospirales	f__Lachnospiraceae	g__Ruminococcus_B	s__Ruminococcus_B gnavus	47660_4#168	97,516	68	99.95	0	chain
47542_1#52_clean_bin.7.strict_cleaned	d__Bacteria	p__Pseudomonadota	c__Gammaproteobacteria	o__Burkholderiales	f__Neisseriaceae	g__Neisseria	s__Neisseria sp000186165	47542_1#52	132,028	30	100	0.01	chain
39923_3#182_bin.14.orig_clean	d__Bacteria	p__Bacillota	c__Bacilli	o__Lactobacillales	f__Lactobacillaceae	g__Lactobacillus	s__Lactobacillus johnsonii	39923_3#182	99049	40	100	0.01	chain
40054_4#22_bin.2.permissive_clean	d__Bacteria	p__Campylobacterota	c__Campylobacteria	o__Campylobacterales	f__Campylobacteraceae	g__Campylobacter_D	s__Campylobacter_D jejuni	40054_4#22	152785	19	99.99	0.01	chain
40054_2#67_bin.13.strict_clean	d__Bacteria	p__Bacillota	c__Bacilli	o__Lactobacillales	f__Streptococcaceae	g__Streptococcus	s__Streptococcus salivarius	40054_2#67	179763	28	99.99	0.01	chain
47660_4#164_clean_bin.30.strict_cleaned	d__Bacteria	p__Bacteroidota	c__Bacteroidia	o__Bacteroidales	f__Bacteroidaceae	g__Phocaeicola	s__Phocaeicola dorei	47660_4#164	253,612	36	99.99	0.01	chain
39907_3#97_bin.17.orig_clean	d__Bacteria	p__Bacteroidota	c__Bacteroidia	o__Bacteroidales	f__Bacteroidaceae	g__Phocaeicola	s__Phocaeicola plebeius_A	39907_3#97	123305	54	99.92	0	chain
47680_3#18_clean_bin.17.strict_cleaned	d__Bacteria	p__Bacteroidota	c__Bacteroidia	o__Bacteroidales	f__Bacteroidaceae	g__Prevotella	s__Prevotella buccae	47680_3#18	125,625	75	99.97	0.01	chain
47660_4#37_clean_bin.4.orig_cleaned	d__Bacteria	p__Bacillota_C	c__Negativicutes	o__Veillonellales	f__Megasphaeraceae	g__Megasphaera	s__Megasphaera sp002319965	47660_4#37	78,031	48	99.96	0.01	chain
47680_3#18_clean_bin.11.orig_cleaned	d__Bacteria	p__Bacillota_A	c__Clostridia	o__Lachnospirales	f__Lachnospiraceae	g__Roseburia	s__Roseburia inulinivorans	47680_3#18	81,574	67	100	0.02	chain
47660_4#111_clean_bin.17.orig_cleaned	d__Bacteria	p__Bacillota_C	c__Negativicutes	o__Selenomonadales	f__Selenomonadaceae	g__Megamonas	s__Megamonas funiformis	47660_4#111	65,899	53	100	0.02	chain
40054_2#165_bin.11.permissive_clean	d__Bacteria	p__Campylobacterota	c__Campylobacteria	o__Campylobacterales	f__Campylobacteraceae	g__Campylobacter_D	s__Campylobacter_D upsaliensis	40054_2#165	65795	50	100	0.02	chain
39907_4#166_bin.34.strict_clean	d__Bacteria	p__Bacillota_A	c__Clostridia	o__Lachnospirales	f__Lachnospiraceae	g__Acetatifactor	s__Acetatifactor intestinalis	39907_4#166	95892	66	99.99	0.02	chain
47660_4#105_clean_bin.10.permissive_cleaned	d__Bacteria	p__Bacillota	c__Bacilli	o__Lactobacillales	f__Enterococcaceae	g__Enterococcus_B	s__Enterococcus_B hirae	47660_4#105	41,505	97	99.99	0.02	chain
39907_3#82_bin.4.orig_clean	d__Bacteria	p__Actinomycetota	c__Actinomycetia	o__Actinomycetales	f__Bifidobacteriaceae	g__Bifidobacterium	s__Bifidobacterium longum	39907_3#82	241463	14	99.99	0.02	chain
47542_1#134_clean_bin.37.orig_cleaned	d__Bacteria	p__Bacteroidota	c__Bacteroidia	o__Bacteroidales	f__Barnesiellaceae	g__Barnesiella	s__Barnesiella intestinihominis	47542_1#134	178,772	32	99.98	0.02	chain
38354_2#16_bin.7.orig_clean	d__Bacteria	p__Actinomycetota	c__Actinomycetia	o__Propionibacteriales	f__Propionibacteriaceae	g__Cutibacterium	s__Cutibacterium avidum	38354_2#16	431425	21	99.98	0.02	chain
47542_1#177_clean_bin.11.orig_cleaned	d__Bacteria	p__Bacteroidota	c__Bacteroidia	o__Bacteroidales	f__Bacteroidaceae	g__Prevotella	s__Prevotella sp900544825	47542_1#177	112,568	55	99.98	0.02	chain
47660_4#70_clean_bin.21.permissive_cleaned	d__Bacteria	p__Bacillota	c__Bacilli	o__Lactobacillales	f__Lactobacillaceae	g__Limosilactobacillus	s__Limosilactobacillus mucosae	47660_4#70	69,990	53	99.92	0.01	chain
40054_4#44_bin.19.strict_clean	d__Bacteria	p__Bacillota_A	c__Clostridia	o__Lachnospirales	f__Lachnospiraceae	g__Agathobacter	s__Agathobacter faecis	40054_4#44	239292	30	99.97	0.02	chain
47660_4#172_clean_bin.11.orig_cleaned	d__Bacteria	p__Bacteroidota	c__Bacteroidia	o__Bacteroidales	f__Bacteroidaceae	g__Prevotella	s__Prevotella stercorea	47660_4#172	76,320	55	99.92	0.01	chain
39923_2#151_bin.38.strict_clean	d__Bacteria	p__Campylobacterota	c__Campylobacteria	o__Campylobacterales	f__Campylobacteraceae	g__Campylobacter	s__Campylobacter infans	39923_2#151	91511	41	99.86	0	chain
47542_1#12_clean_bin.32.orig_cleaned	d__Bacteria	p__Bacillota_A	c__Clostridia	o__Lachnospirales	f__Lachnospiraceae	g__Copromonas	s__Copromonas sp900066535	47542_1#12	46,638	93	100	0.03	chain
38354_5#18_bin.2.strict_clean	d__Bacteria	p__Bacillota	c__Bacilli	o__Lactobacillales	f__Streptococcaceae	g__Streptococcus	s__Streptococcus lactarius	38354_5#18	57076	58	99.9	0.01	chain
47542_1#42_clean_bin.2.strict_cleaned	d__Bacteria	p__Campylobacterota	c__Campylobacteria	o__Campylobacterales	f__Helicobacteraceae	g__Helicobacter_F	s__Helicobacter_F sp002287135	47542_1#42	242,296	22	99.89	0.01	chain
47660_4#44_clean_bin.6.orig_cleaned	d__Bacteria	p__Bacillota_A	c__Clostridia	o__Lachnospirales	f__Lachnospiraceae	g__Blautia_A	s__Blautia_A massiliensis	47660_4#44	87,713	57	99.89	0.01	chain
39907_1#35_bin.34.permissive_clean	d__Bacteria	p__Bacillota_C	c__Negativicutes	o__Veillonellales	f__Megasphaeraceae	g__Megasphaera	s__Megasphaera sp900540735	39907_1#35	119046	51	99.93	0.02	chain
39907_2#105_bin.6.orig_clean	d__Bacteria	p__Bacteroidota	c__Bacteroidia	o__Bacteroidales	f__Bacteroidaceae	g__Phocaeicola	s__Phocaeicola faecium	39907_2#105	44866	144	99.83	0	chain
47660_4#20_clean_bin.20.strict_cleaned	d__Bacteria	p__Bacillota_A	c__Clostridia	o__UBA1381	f__UBA1381	g__CAG-41	s__CAG-41 sp900066215	47660_4#20	53,474	71	99.83	0	chain
39907_1#27_bin.3.permissive_clean	d__Bacteria	p__Campylobacterota	c__Campylobacteria	o__Campylobacterales	f__Campylobacteraceae	g__Campylobacter_D	s__Campylobacter_D coli	39907_1#27	898483	5	99.98	0.03	chain
47542_1#42_clean_bin.8.orig_cleaned	d__Bacteria	p__Bacteroidota	c__Bacteroidia	o__Bacteroidales	f__Bacteroidaceae	g__Prevotella	s__Prevotella copri_A	47542_1#42	100,093	65	99.87	0.01	chain
47542_1#48_clean_bin.23.orig_cleaned	d__Bacteria	p__Bacteroidota	c__Bacteroidia	o__Bacteroidales	f__Bacteroidaceae	g__Prevotella	s__Prevotella sp900543975	47542_1#48	52,430	85	99.92	0.02	chain
40054_4#44_bin.17.strict_clean	d__Bacteria	p__Bacillota_C	c__Negativicutes	o__Veillonellales	f__Veillonellaceae	g__Veillonella_A	s__Veillonella_A sp000431435	40054_4#44	49778	80	99.9	0.02	chain
47542_1#96_clean_bin.7.orig_cleaned	d__Bacteria	p__Bacillota_A	c__Clostridia	o__Lachnospirales	f__Lachnospiraceae	g__Agathobacter	s__Agathobacter sp900543445	47542_1#96	85,920	52	99.8	0	chain
47660_4#11_clean_bin.14.orig_cleaned	d__Bacteria	p__Bacteroidota	c__Bacteroidia	o__Bacteroidales	f__Muribaculaceae	g__Limisoma	s__Limisoma sp000437795	47660_4#11	121,229	32	99.95	0.03	chain
47542_1#33_clean_bin.15.orig_cleaned	d__Bacteria	p__Actinomycetota	c__Actinomycetia	o__Actinomycetales	f__Bifidobacteriaceae	g__Bifidobacterium	s__Bifidobacterium breve	47542_1#33	175,874	26	99.94	0.03	chain
47542_1#98_clean_bin.28.strict_cleaned	d__Bacteria	p__Cyanobacteriota	c__Vampirovibrionia	o__Gastranaerophilales	f__Gastranaerophilaceae	g__Stercorousia	s__Stercorousia sp900769355	47542_1#98	1,100,093	11	99.84	0.01	chain
47660_4#122_clean_bin.21.permissive_cleaned	d__Bacteria	p__Bacillota_A	c__Clostridia	o__Oscillospirales	f__Ruminococcaceae	g__Faecalibacterium	s__Faecalibacterium longum	47660_4#122	162,883	38	99.83	0.01	chain
39923_1#7_bin.1.orig_clean	d__Bacteria	p__Bacillota_C	c__Negativicutes	o__Veillonellales	f__Veillonellaceae	g__Veillonella	s__Veillonella sp018367495	39923_1#7	311518	35	99.98	0.04	chain
47660_4#129_clean_bin.15.orig_cleaned	d__Bacteria	p__Bacillota_A	c__Clostridia	o__Lachnospirales	f__Lachnospiraceae	g__Agathobacter	s__Agathobacter sp905209075	47660_4#129	131,894	43	99.97	0.04	chain
47660_4#55_clean_bin.21.permissive_cleaned	d__Bacteria	p__Cyanobacteriota	c__Vampirovibrionia	o__Gastranaerophilales	f__Gastranaerophilaceae	g__Zag111	s__Zag111 sp002103105	47660_4#55	645,390	5	99.92	0.03	chain
39923_1#58_bin.7.permissive_clean	d__Bacteria	p__Campylobacterota	c__Campylobacteria	o__Campylobacterales	f__Helicobacteraceae	g__Helicobacter_C	s__Helicobacter_C magdeburgensis	39923_1#58	397312	8	99.97	0.04	chain
47680_3#18_clean_bin.3.orig_cleaned	d__Bacteria	p__Bacillota_A	c__Clostridia	o__Lachnospirales	f__Lachnospiraceae	g__Fusicatenibacter	s__Fusicatenibacter saccharivorans	47680_3#18	121,418	35	99.87	0.02	chain
40054_2#163_bin.15.orig_clean	d__Bacteria	p__Bacillota_C	c__Negativicutes	o__Veillonellales	f__Veillonellaceae	g__Veillonella	s__Veillonella rogosae	40054_2#163	121351	31	99.97	0.04	chain
39907_1#59_bin.1.orig_clean	d__Bacteria	p__Bacteroidota	c__Bacteroidia	o__Bacteroidales	f__Bacteroidaceae	g__Prevotella	s__Prevotella sp015074785	39907_1#59	160940	50	99.96	0.04	chain
39907_1#54_bin.17.orig_clean	d__Bacteria	p__Bacillota_A	c__Clostridia	o__Lachnospirales	f__Lachnospiraceae	g__Faecalimonas	s__Faecalimonas phoceensis	39907_1#54	77297	69	99.96	0.04	chain
47660_4#169_clean_bin.5.orig_cleaned	d__Bacteria	p__Bacillota_A	c__Clostridia	o__Oscillospirales	f__Ruminococcaceae	g__Ruminiclostridium_E	s__Ruminiclostridium_E siraeum	47660_4#169	95,273	46	99.96	0.04	chain
39923_4#7_bin.3.orig_clean	d__Bacteria	p__Pseudomonadota	c__Gammaproteobacteria	o__Enterobacterales	f__Enterobacteriaceae	g__Providencia	s__Providencia rettgeri_F	39923_4#7	408598	17	100	0.05	chain
47542_1#109_clean_bin.15.strict_cleaned	d__Bacteria	p__Bacillota	c__Bacilli	o__Lactobacillales	f__Streptococcaceae	g__Streptococcus	s__Streptococcus lutetiensis	47542_1#109	102,927	27	99.99	0.05	chain
39907_2#169_bin.6.strict_clean	d__Bacteria	p__Bacillota_C	c__Negativicutes	o__Veillonellales	f__Veillonellaceae	g__Veillonella	s__Veillonella sp022737715	39907_2#169	134222	33	99.99	0.05	chain
47660_4#48_clean_bin.22.strict_cleaned	d__Bacteria	p__Pseudomonadota	c__Gammaproteobacteria	o__Enterobacterales	f__Enterobacteriaceae	g__Klebsiella	s__Klebsiella pneumoniae	47660_4#48	103,893	81	99.82	0.02	chain
40054_4#42_bin.27.orig_clean	d__Bacteria	p__Campylobacterota	c__Campylobacteria	o__Campylobacterales	f__Helicobacteraceae	g__NHYM01	s__NHYM01 sp944323755	40054_4#42	881410	11	99.91	0.04	chain
39923_3#21_bin.5.orig_clean	d__Bacteria	p__Campylobacterota	c__Campylobacteria	o__Campylobacterales	f__Helicobacteraceae	g__NHYM01	s__NHYM01 sp003364295	39923_3#21	155029	15	99.96	0.05	chain
47660_4#68_clean_bin.15.orig_cleaned	d__Bacteria	p__Bacillota_C	c__Negativicutes	o__Veillonellales	f__Megasphaeraceae	g__Anaeroglobus	s__Anaeroglobus micronuciformis	47660_4#68	334,239	6	99.75	0.01	chain
39907_1#62_bin.42.orig_clean	d__Bacteria	p__Bacteroidota	c__Bacteroidia	o__Bacteroidales	f__Paludibacteraceae	g__RF16	s__RF16 sp900556095	39907_1#62	129425	28	100	0.06	chain
39907_4#147_bin.20.permissive_clean	d__Bacteria	p__Bacillota_C	c__Negativicutes	o__Veillonellales	f__Megasphaeraceae	g__Megasphaera	s__Megasphaera stantonii	39907_4#147	73143	67	99.8	0.02	chain
38353_8#17_bin.13.strict_clean	d__Bacteria	p__Bacillota_A	c__Clostridia	o__Oscillospirales	f__Ruminococcaceae	g__Gemmiger	s__Gemmiger formicilis	38353_8#17	102459	55	99.94	0.05	chain
40054_2#74_bin.3.orig_clean	d__Bacteria	p__Bacteroidota	c__Bacteroidia	o__Bacteroidales	f__Bacteroidaceae	g__Prevotella	s__Prevotella sp002265625	40054_2#74	80817	77	99.98	0.06	chain
47680_3#3_clean_bin.6.orig_cleaned	d__Bacteria	p__Bacillota	c__Bacilli	o__Lactobacillales	f__Lactobacillaceae	g__Lactobacillus	s__Lactobacillus crispatus	47680_3#3	28,217	110	99.78	0.02	chain
47542_1#115_clean_bin.19.strict_cleaned	d__Bacteria	p__Bacillota_A	c__Clostridia	o__Lachnospirales	f__Lachnospiraceae	g__Blautia_A	s__Blautia_A sp900066335	47542_1#115	100,705	62	99.98	0.06	chain
47680_3#18_clean_bin.5.strict_cleaned	d__Bacteria	p__Pseudomonadota	c__Gammaproteobacteria	o__Burkholderiales	f__Burkholderiaceae_A	g__Parasutterella	s__Parasutterella gallistercoris	47680_3#18	36,890	106	99.95	0.06	chain
38353_3#20_bin.7.permissive_clean	d__Bacteria	p__Bacillota_A	c__Clostridia	o__Lachnospirales	f__Lachnospiraceae	g__Mediterraneibacter	s__Mediterraneibacter torques	38353_3#20	71209	66	99.65	0	chain
47660_4#169_clean_bin.4.orig_cleaned	d__Bacteria	p__Bacteroidota	c__Bacteroidia	o__Bacteroidales	f__Bacteroidaceae	g__Alloprevotella	s__Alloprevotella sp900540885	47660_4#169	21,455	193	99.7	0.01	chain
47542_1#122_clean_bin.16.strict_cleaned	d__Bacteria	p__Bacillota	c__Bacilli	o__Lactobacillales	f__Streptococcaceae	g__Streptococcus	s__Streptococcus infantarius	47542_1#122	446,203	12	100	0.07	chain
47660_4#41_clean_bin.18.strict_cleaned	d__Bacteria	p__Actinomycetota	c__Coriobacteriia	o__Coriobacteriales	f__Atopobiaceae	g__Parolsenella	s__Parolsenella catena	47660_4#41	1,481,708	4	99.95	0.06	chain
38354_5#18_bin.10.strict_clean	d__Bacteria	p__Bacillota_C	c__Negativicutes	o__Veillonellales	f__Veillonellaceae	g__Veillonella	s__Veillonella parvula_A	38354_5#18	556723	10	99.99	0.07	chain
39923_3#21_bin.24.permissive_clean	d__Bacteria	p__Campylobacterota	c__Campylobacteria	o__Campylobacterales	f__Campylobacteraceae	g__Campylobacter_D	s__Campylobacter_D sp900539255	39923_3#21	130557	26	99.94	0.06	chain
47660_4#100_clean_bin.27.strict_cleaned	d__Bacteria	p__Bacteroidota	c__Bacteroidia	o__Bacteroidales	f__Bacteroidaceae	g__Prevotella	s__Prevotella sp000434975	47660_4#100	78,907	70	99.98	0.07	chain
47660_4#65_clean_bin.2.orig_cleaned	d__Bacteria	p__Pseudomonadota	c__Gammaproteobacteria	o__Enterobacterales	f__Enterobacteriaceae	g__Citrobacter	s__Citrobacter youngae	47660_4#65	504,718	22	100	0.08	chain
39907_1#46_bin.11.orig_clean	d__Bacteria	p__Bacillota_C	c__Negativicutes	o__Veillonellales	f__Veillonellaceae	g__Veillonella	s__Veillonella atypica	39907_1#46	99019	37	100	0.08	chain
40054_2#174_bin.16.permissive_clean	d__Bacteria	p__Pseudomonadota	c__Gammaproteobacteria	o__Burkholderiales	f__Burkholderiaceae_A	g__Duodenibacillus	s__Duodenibacillus massiliensis	40054_2#174	50267	86	99.99	0.08	chain
47660_4#130_clean_bin.6.permissive_cleaned	d__Bacteria	p__Actinomycetota	c__Actinomycetia	o__Actinomycetales	f__Actinomycetaceae	g__Actinomyces	s__Actinomyces urogenitalis	47660_4#130	47,104	98	99.99	0.08	chain
39907_1#41_bin.8.strict_clean	d__Bacteria	p__Actinomycetota	c__Actinomycetia	o__Actinomycetales	f__Bifidobacteriaceae	g__Bifidobacterium	s__Bifidobacterium kashiwanohense_A	39907_1#41	353891	26	99.98	0.08	chain
47660_4#151_clean_bin.8.strict_cleaned	d__Bacteria	p__Actinomycetota	c__Coriobacteriia	o__Coriobacteriales	f__Eggerthellaceae	g__Senegalimassilia	s__Senegalimassilia anaerobia	47660_4#151	125,911	32	99.98	0.08	chain
39907_1#53_bin.28.orig_clean	d__Bacteria	p__Bacteroidota	c__Bacteroidia	o__Bacteroidales	f__Bacteroidaceae	g__Prevotella	s__Prevotella sp934202525	39907_1#53	79265	78	99.98	0.08	chain
47660_4#106_clean_bin.1.orig_cleaned	d__Bacteria	p__Actinomycetota	c__Coriobacteriia	o__Coriobacteriales	f__Eggerthellaceae	g__Eggerthella	s__Eggerthella lenta	47660_4#106	59,853	85	99.98	0.08	chain
40054_2#161_bin.6.orig_clean	d__Bacteria	p__Bacteroidota	c__Bacteroidia	o__Bacteroidales	f__Bacteroidaceae	g__Prevotella	s__Prevotella sp900290275	40054_2#161	44603	121	99.92	0.07	chain
47660_4#11_clean_bin.20.orig_cleaned	d__Bacteria	p__Bacillota_A	c__Clostridia	o__Lachnospirales	f__Lachnospiraceae	g__Acetatifactor	s__Acetatifactor sp003447295	47660_4#11	79,857	61	99.87	0.06	chain
47542_1#31_clean_bin.8.orig_cleaned	d__Bacteria	p__Bacillota_C	c__Negativicutes	o__Acidaminococcales	f__Acidaminococcaceae	g__Phascolarctobacterium_A	s__Phascolarctobacterium_A succinatutens	47542_1#31	83,252	38	100	0.09	chain
39907_1#43_bin.42.strict_clean	d__Bacteria	p__Bacillota_A	c__Clostridia	o__Oscillospirales	f__Ruminococcaceae	g__Gemmiger	s__Gemmiger qucibialis	39907_1#43	26578	150	99.95	0.08	chain
47660_4#17_clean_bin.10.orig_cleaned	d__Bacteria	p__Bacteroidota	c__Bacteroidia	o__Bacteroidales	f__Bacteroidaceae	g__Prevotella	s__Prevotella sp934191715	47660_4#17	54,045	129	99.99	0.09	chain
47542_1#111_clean_bin.39.orig_cleaned	d__Bacteria	p__Bacillota_A	c__Clostridia	o__Lachnospirales	f__Lachnospiraceae	g__Butyrivibrio_A	s__Butyrivibrio_A crossotus	47542_1#111	251,893	17	99.99	0.09	chain
47660_4#91_clean_bin.1.orig_cleaned	d__Bacteria	p__Bacillota_C	c__Negativicutes	o__Veillonellales	f__Veillonellaceae	g__Veillonella	s__Veillonella sp900538355	47660_4#91	291,076	11	99.98	0.09	chain
47660_4#175_clean_bin.25.strict_cleaned	d__Bacteria	p__Bacteroidota	c__Bacteroidia	o__Bacteroidales	f__Marinifilaceae	g__Odoribacter	s__Odoribacter splanchnicus	47660_4#175	79,465	91	99.98	0.09	chain
40054_2#179_bin.27.strict_clean	d__Bacteria	p__Bacillota_A	c__Clostridia	o__Monoglobales	f__Monoglobaceae	g__UMGS1820	s__UMGS1820 sp902797885	40054_2#179	76966	69	99.82	0.06	chain
39907_3#86_bin.13.permissive_clean	d__Bacteria	p__Bacillota_C	c__Negativicutes	o__Selenomonadales	f__Selenomonadaceae	g__Anaerovibrio	s__Anaerovibrio sp934203205	39907_3#86	36005	101	99.97	0.09	chain
39907_1#60_bin.19.strict_clean	d__Bacteria	p__Bacillota_A	c__Clostridia	o__Lachnospirales	f__Lachnospiraceae	g__Lachnospira	s__Lachnospira sp000436475	39907_1#60	73741	69	99.97	0.09	chain
40054_2#165_bin.17.permissive_clean	d__Bacteria	p__Actinomycetota	c__Actinomycetia	o__Actinomycetales	f__Bifidobacteriaceae	g__Bifidobacterium	s__Bifidobacterium sp002742445	40054_2#165	626594	20	99.92	0.08	chain
47660_4#14_clean_bin.8.orig_cleaned	d__Bacteria	p__Bacillota_A	c__Clostridia	o__Lachnospirales	f__Lachnospiraceae	g__Dorea_A	s__Dorea_A longicatena_B	47660_4#14	38,549	99	99.61	0.02	chain
47660_4#27_clean_bin.19.orig_cleaned	d__Bacteria	p__Actinomycetota	c__Actinomycetia	o__Actinomycetales	f__Bifidobacteriaceae	g__Bifidobacterium	s__Bifidobacterium bifidum	47660_4#27	170,673	36	99.66	0.03	chain
40054_2#73_bin.16.orig_clean	d__Bacteria	p__Bacteroidota	c__Bacteroidia	o__Bacteroidales	f__Bacteroidaceae	g__Alloprevotella	s__Alloprevotella timonensis	40054_2#73	40882	119	99.56	0.01	chain
47542_1#130_clean_bin.16.strict_cleaned	d__Bacteria	p__Bacillota_A	c__Clostridia	o__Lachnospirales	f__Lachnospiraceae	g__Eubacterium_F	s__Eubacterium_F sp900539115	47542_1#130	61,380	76	99.86	0.07	chain
47660_4#170_clean_bin.3.orig_cleaned	d__Bacteria	p__Bacillota_C	c__Negativicutes	o__Veillonellales	f__Megasphaeraceae	g__Megasphaera	s__Megasphaera sp900554215	47660_4#170	99,292	36	99.81	0.06	chain
39923_3#1_bin.7.strict_clean	d__Bacteria	p__Bacillota	c__Bacilli	o__Lactobacillales	f__Streptococcaceae	g__Lactococcus	s__Lactococcus petauri	39923_3#1	89790	43	99.96	0.09	chain
47660_4#143_clean_bin.9.permissive_cleaned	d__Bacteria	p__Actinomycetota	c__Actinomycetia	o__Actinomycetales	f__Actinomycetaceae	g__Pauljensenia	s__Pauljensenia sp902373435	47660_4#143	126,667	39	100	0.1	chain
47660_4#98_clean_bin.5.orig_cleaned	d__Bacteria	p__Verrucomicrobiota	c__Verrucomicrobiae	o__Verrucomicrobiales	f__Akkermansiaceae	g__Akkermansia	s__Akkermansia muciniphila	47660_4#98	203,074	18	100	0.1	chain
47660_4#160_clean_bin.23.orig_cleaned	d__Bacteria	p__Bacillota	c__Bacilli	o__Lactobacillales	f__Streptococcaceae	g__Lactococcus	s__Lactococcus garvieae	47660_4#160	94,585	38	99.85	0.07	chain
38755_6#4_bin.11.orig_clean	d__Bacteria	p__Bacillota_C	c__Negativicutes	o__Veillonellales	f__Veillonellaceae	g__Veillonella_A	s__Veillonella_A seminalis	38755_6#4	154771	23	99.84	0.07	chain
39923_2#158_bin.8.permissive_clean	d__Bacteria	p__Bacillota	c__Bacilli	o__Lactobacillales	f__Lactobacillaceae	g__Ligilactobacillus	s__Ligilactobacillus sp900765635	39923_2#158	39925	65	99.89	0.08	chain
47542_1#179_clean_bin.2.orig_cleaned	d__Bacteria	p__Bacteroidota	c__Bacteroidia	o__Bacteroidales	f__Bacteroidaceae	g__Prevotella	s__Prevotella sp900546575	47542_1#179	59,809	87	99.73	0.05	chain
39907_4#47_bin.6.orig_clean	d__Bacteria	p__Bacillota	c__Bacilli	o__Lactobacillales	f__Lactobacillaceae	g__Lacticaseibacillus	s__Lacticaseibacillus paracasei	39907_4#47	135115	39	99.77	0.06	chain
39923_4#164_bin.6.strict_clean	d__Bacteria	p__Actinomycetota	c__Actinomycetia	o__Actinomycetales	f__Actinomycetaceae	g__Pauljensenia	s__Pauljensenia sp900541895	39923_4#164	146738	20	99.97	0.1	chain
39907_2#90_bin.5.strict_clean	d__Bacteria	p__Actinomycetota	c__Coriobacteriia	o__Coriobacteriales	f__Atopobiaceae	g__Parolsenella	s__Parolsenella massiliensis	39907_2#90	1036970	10	99.92	0.09	chain
47680_3#41_clean_bin.6.orig_cleaned	d__Bacteria	p__Bacteroidota	c__Bacteroidia	o__Bacteroidales	f__Bacteroidaceae	g__Prevotella	s__Prevotella sp003447235	47680_3#41	62,497	73	99.85	0.08	chain
47660_4#62_clean_bin.21.permissive_cleaned	d__Bacteria	p__Bacillota_A	c__Clostridia	o__Oscillospirales	f__Acutalibacteraceae	g__CAG-217	s__CAG-217 sp000436335	47660_4#62	256,843	13	99.65	0.04	chain
40054_4#11_bin.6.strict_clean	d__Bacteria	p__Bacillota_C	c__Negativicutes	o__Veillonellales	f__Veillonellaceae	g__Veillonella	s__Veillonella sp900550455	40054_4#11	126212	16	99.45	0	chain
47660_4#78_clean_bin.22.permissive_cleaned	d__Bacteria	p__Bacillota_C	c__Negativicutes	o__Acidaminococcales	f__Acidaminococcaceae	g__Acidaminococcus	s__Acidaminococcus intestini	47660_4#78	141,420	33	99.99	0.11	chain
47660_4#82_clean_bin.13.strict_cleaned	d__Bacteria	p__Campylobacterota	c__Campylobacteria	o__Campylobacterales	f__Helicobacteraceae	g__Helicobacter_D	s__Helicobacter_D sp022766795	47660_4#82	158,087	34	99.99	0.11	chain
47660_4#53_clean_bin.3.strict_cleaned	d__Bacteria	p__Bacillota_A	c__Clostridia	o__Lachnospirales	f__Lachnospiraceae	g__Blautia_A	s__Blautia_A wexlerae	47660_4#53	274,076	37	99.93	0.1	chain
47660_4#177_clean_bin.12.orig_cleaned	d__Bacteria	p__Campylobacterota	c__Campylobacteria	o__Campylobacterales	f__Helicobacteraceae	g__Helicobacter_F	s__Helicobacter_F avicola	47660_4#177	559,651	7	99.98	0.11	chain
47660_4#103_clean_bin.7.strict_cleaned	d__Bacteria	p__Bacillota_A	c__Clostridia	o__Oscillospirales	f__Acutalibacteraceae	g__UMGS1279	s__UMGS1279 sp900550315	47660_4#103	174,391	44	99.93	0.1	chain
40054_4#36_bin.13.orig_clean	d__Bacteria	p__Bacillota_C	c__Negativicutes	o__Veillonellales	f__Dialisteraceae	g__Dialister	s__Dialister sp022722495	40054_4#36	32564	135	99.97	0.11	chain
47660_4#169_clean_bin.26.orig_cleaned	d__Bacteria	p__Cyanobacteriota	c__Vampirovibrionia	o__Gastranaerophilales	f__Gastranaerophilaceae	g__Stercorousia	s__Stercorousia sp001765415	47660_4#169	454,374	11	99.97	0.11	chain
39907_2#97_bin.13.orig_clean	d__Bacteria	p__Bacillota_C	c__Negativicutes	o__Veillonellales	f__Dialisteraceae	g__Dialister	s__Dialister sp000434475	39907_2#97	17346	187	99.77	0.07	chain
39907_1#60_bin.13.orig_clean	d__Bacteria	p__Bacillota_C	c__Negativicutes	o__Acidaminococcales	f__Acidaminococcaceae	g__Phascolarctobacterium_A	s__Phascolarctobacterium_A sp934190775	39907_1#60	114498	38	100	0.12	chain
47660_4#108_clean_bin.7.orig_cleaned	d__Bacteria	p__Bacillota_A	c__Clostridia	o__Oscillospirales	f__Butyricicoccaceae	g__Agathobaculum	s__Agathobaculum sp900544475	47660_4#108	31,756	117	100	0.12	chain
47542_1#185_clean_bin.35.orig_cleaned	d__Bacteria	p__Bacillota	c__Bacilli	o__Lactobacillales	f__Streptococcaceae	g__Streptococcus	s__Streptococcus pasteurianus	47542_1#185	157,214	16	100	0.12	chain
40054_2#179_bin.5.permissive_clean	d__Bacteria	p__Verrucomicrobiota	c__Verrucomicrobiae	o__Verrucomicrobiales	f__Akkermansiaceae	g__Akkermansia	s__Akkermansia muciniphila_B	40054_2#179	214795	28	100	0.12	chain
38353_3#29_bin.31.strict_clean	d__Bacteria	p__Bacteroidota	c__Bacteroidia	o__Bacteroidales	f__Rikenellaceae	g__Alistipes	s__Alistipes putredinis	38353_3#29	213947	20	99.95	0.11	chain
47660_4#125_clean_bin.8.orig_cleaned	d__Bacteria	p__Bacteroidota	c__Bacteroidia	o__Bacteroidales	f__Bacteroidaceae	g__Bacteroides	s__Bacteroides fragilis_A	47660_4#125	277,023	35	99.99	0.12	chain
38354_8#22_bin.7.strict_clean	d__Bacteria	p__Bacillota_C	c__Negativicutes	o__Veillonellales	f__Veillonellaceae	g__Veillonella	s__Veillonella sp905214495	38354_8#22	94836	42	99.99	0.12	chain
39907_1#57_bin.29.permissive_clean	d__Bacteria	p__Bacillota_C	c__Negativicutes	o__Veillonellales	f__Veillonellaceae	g__Veillonella_A	s__Veillonella_A magna	39907_1#57	179756	24	99.99	0.12	chain
47660_4#124_clean_bin.7.orig_cleaned	d__Bacteria	p__Bacteroidota	c__Bacteroidia	o__Bacteroidales	f__Bacteroidaceae	g__Bacteroides	s__Bacteroides fragilis	47660_4#124	422,073	24	99.98	0.12	chain
47542_1#113_clean_bin.28.orig_cleaned	d__Bacteria	p__Bacillota_A	c__Clostridia	o__Lachnospirales	f__Lachnospiraceae	g__CAG-882	s__CAG-882 sp003486385	47542_1#113	73,078	83	99.98	0.12	chain
38354_8#32_bin.15.strict_clean	d__Bacteria	p__Bacteroidota	c__Bacteroidia	o__Bacteroidales	f__Bacteroidaceae	g__Prevotella	s__Prevotella sp900552675	38354_8#32	50565	114	99.88	0.1	chain
47660_4#144_clean_bin.6.permissive_cleaned	d__Bacteria	p__Bacillota	c__Bacilli	o__Lactobacillales	f__Lactobacillaceae	g__Lacticaseibacillus	s__Lacticaseibacillus rhamnosus	47660_4#144	100,948	56	99.71	0.07	chain
47542_1#134_clean_bin.38.permissive_cleaned	d__Bacteria	p__Bacillota_A	c__Clostridia	o__Oscillospirales	f__Ruminococcaceae	g__CAG-353	s__CAG-353 sp900066885	47542_1#134	235,362	23	99.91	0.11	chain
40054_4#7_bin.15.strict_clean	d__Bacteria	p__Bacillota	c__Bacilli	o__Lactobacillales	f__Enterococcaceae	g__Enterococcus	s__Enterococcus faecalis	40054_4#7	178717	33	100	0.13	chain
39923_3#180_bin.6.orig_clean	d__Bacteria	p__Pseudomonadota	c__Gammaproteobacteria	o__Enterobacterales_A	f__Aeromonadaceae	g__Aeromonas	s__Aeromonas caviae	39923_3#180	256605	28	100	0.13	chain
47542_1#106_clean_bin.7.strict_cleaned	d__Bacteria	p__Bacillota_C	c__Negativicutes	o__Acidaminococcales	f__Acidaminococcaceae	g__URXU01	s__URXU01 sp900541915	47542_1#106	221,620	14	100	0.13	chain
47660_4#64_clean_bin.42.orig_cleaned	d__Bacteria	p__Bacillota_C	c__Negativicutes	o__Acidaminococcales	f__Acidaminococcaceae	g__Phascolarctobacterium	s__Phascolarctobacterium faecium	47660_4#64	102,357	71	100	0.14	chain
39907_1#45_bin.5.permissive_clean	d__Bacteria	p__Bacteroidota	c__Bacteroidia	o__Bacteroidales	f__Muribaculaceae	g__UBA7173	s__UBA7173 sp900546835	39907_1#45	331807	30	99.64	0.07	chain
39907_2#109_bin.5.orig_clean	d__Bacteria	p__Bacteroidota	c__Bacteroidia	o__Bacteroidales	f__Rikenellaceae	g__Alistipes_A	s__Alistipes_A indistinctus	39907_2#109	273512	19	99.93	0.13	chain
47660_4#147_clean_bin.21.orig_cleaned	d__Bacteria	p__Bacteroidota	c__Bacteroidia	o__Bacteroidales	f__Bacteroidaceae	g__Prevotella	s__Prevotella sp900313215	47660_4#147	51,818	108	99.87	0.12	chain
39907_1#35_bin.17.permissive_clean	d__Bacteria	p__Fusobacteriota	c__Fusobacteriia	o__Fusobacteriales	f__Fusobacteriaceae	g__Cetobacterium_A	s__Cetobacterium_A sp934085975	39907_1#35	93557	50	100	0.15	chain
39923_4#57_bin.27.strict_clean	d__Bacteria	p__Bacillota_A	c__Clostridia	o__Clostridiales	f__Clostridiaceae	g__Clostridium	s__Clostridium sp900540255	39923_4#57	42402	114	100	0.15	chain
39907_1#66_bin.16.orig_clean	d__Bacteria	p__Bacillota_C	c__Negativicutes	o__Selenomonadales	f__Selenomonadaceae	g__Anaerovibrio	s__Anaerovibrio sp900548165	39907_1#66	59696	59	100	0.15	chain
47542_1#115_clean_bin.34.strict_cleaned	d__Bacteria	p__Bacillota_C	c__Negativicutes	o__Veillonellales	f__Megasphaeraceae	g__Megasphaera	s__Megasphaera sp934193515	47542_1#115	83,060	55	99.99	0.15	chain
38354_2#20_bin.5.orig_clean	d__Bacteria	p__Bacillota	c__Bacilli	o__Lactobacillales	f__Lactobacillaceae	g__Limosilactobacillus	s__Limosilactobacillus oris	38354_2#20	51985	57	99.83	0.12	chain
39923_1#9_bin.14.permissive_clean	d__Bacteria	p__Pseudomonadota	c__Gammaproteobacteria	o__Burkholderiales	f__Burkholderiaceae	g__Ralstonia	s__Ralstonia sp913056305	39923_1#9	178184	75	99.97	0.15	chain
39907_4#147_bin.4.strict_clean	d__Bacteria	p__Bacteroidota	c__Bacteroidia	o__Bacteroidales	f__Bacteroidaceae	g__Bacteroides	s__Bacteroides uniformis	39907_4#147	154646	45	99.9	0.14	chain
47660_4#66_clean_bin.12.orig_cleaned	d__Bacteria	p__Bacillota_A	c__Clostridia	o__Oscillospirales	f__Ruminococcaceae	g__Faecalibacterium	s__Faecalibacterium prausnitzii_I	47660_4#66	182,565	23	99.8	0.12	chain
47660_4#107_clean_bin.29.strict_cleaned	d__Bacteria	p__Bacteroidota	c__Bacteroidia	o__Bacteroidales	f__Tannerellaceae	g__Parabacteroides	s__Parabacteroides merdae	47660_4#107	155,273	48	99.79	0.12	chain
39923_4#50_bin.14.orig_clean	d__Bacteria	p__Bacillota_A	c__Clostridia	o__Lachnospirales	f__Lachnospiraceae	g__CAG-303	s__CAG-303 sp900539455	39923_4#50	277019	24	99.98	0.16	chain
47660_4#144_clean_bin.26.strict_cleaned	d__Bacteria	p__Bacteroidota	c__Bacteroidia	o__Bacteroidales	f__Bacteroidaceae	g__Bacteroides	s__Bacteroides clarus	47660_4#144	542,338	16	99.93	0.15	chain
39923_3#1_bin.1.permissive_clean	d__Bacteria	p__Bacillota	c__Bacilli	o__Lactobacillales	f__Lactobacillaceae	g__Leuconostoc	s__Leuconostoc lactis	39923_3#1	128640	25	99.97	0.16	chain
47660_4#70_clean_bin.17.permissive_cleaned	d__Bacteria	p__Bacillota	c__Bacilli	o__Lactobacillales	f__Lactobacillaceae	g__Ligilactobacillus	s__Ligilactobacillus ruminis	47660_4#70	82,497	36	99.97	0.16	chain
47680_3#3_clean_bin.12.permissive_cleaned	d__Bacteria	p__Bacillota	c__Bacilli	o__Lactobacillales	f__Lactobacillaceae	g__Limosilactobacillus	s__Limosilactobacillus vaginalis	47680_3#3	126,714	37	99.97	0.16	chain
47660_4#83_clean_bin.18.strict_cleaned	d__Bacteria	p__Bacillota_A	c__Clostridia	o__Oscillospirales	f__Acutalibacteraceae	g__UBA1417	s__UBA1417 sp003531055	47660_4#83	346,670	21	100	0.17	chain
40054_4#42_bin.14.strict_clean	d__Bacteria	p__Pseudomonadota	c__Gammaproteobacteria	o__Burkholderiales	f__Burkholderiaceae_A	g__Duodenibacillus	s__Duodenibacillus intestinavium	40054_4#42	194164	26	100	0.17	chain
39907_1#47_bin.23.orig_clean	d__Bacteria	p__Bacillota_A	c__Clostridia	o__Lachnospirales	f__Lachnospiraceae	g__Agathobacter	s__Agathobacter sp900546625	39907_1#47	198202	27	99.99	0.17	chain
39923_3#38_bin.18.orig_clean	d__Bacteria	p__Pseudomonadota	c__Gammaproteobacteria	o__Enterobacterales	f__Enterobacteriaceae	g__Enterobacter	s__Enterobacter cloacae	39923_3#38	37472	196	99.99	0.17	chain
47660_4#112_clean_bin.2.orig_cleaned	d__Bacteria	p__Campylobacterota	c__Campylobacteria	o__Campylobacterales	f__Helicobacteraceae	g__Helicobacter_B	s__Helicobacter_B fennelliae	47660_4#112	89,559	40	99.67	0.11	chain
47660_4#106_clean_bin.13.strict_cleaned	d__Bacteria	p__Bacteroidota	c__Bacteroidia	o__Bacteroidales	f__Bacteroidaceae	g__Phocaeicola	s__Phocaeicola barnesiae	47660_4#106	181,774	38	99.96	0.17	chain
47660_4#101_clean_bin.4.permissive_cleaned	d__Bacteria	p__Actinomycetota	c__Actinomycetia	o__Actinomycetales	f__Micrococcaceae	g__Rothia	s__Rothia sp902373285	47660_4#101	226,728	17	100	0.18	chain
47660_4#149_clean_bin.28.strict_cleaned	d__Bacteria	p__Bacillota_A	c__Clostridia	o__Lachnospirales	f__Lachnospiraceae	g__Lachnospira	s__Lachnospira sp000436535	47660_4#149	138,525	36	99.94	0.17	chain
39907_1#75_bin.3.orig_clean	d__Bacteria	p__Fusobacteriota	c__Fusobacteriia	o__Fusobacteriales	f__Fusobacteriaceae	g__Fusobacterium_A	s__Fusobacterium_A mortiferum	39907_1#75	99237	45	99.97	0.18	chain
39923_4#164_bin.4.strict_clean	d__Bacteria	p__Actinomycetota	c__Coriobacteriia	o__Coriobacteriales	f__Atopobiaceae	g__Lancefieldella	s__Lancefieldella sp022732885	39923_4#164	381938	4	99.92	0.17	chain
39923_2#180_bin.40.strict_clean	d__Bacteria	p__Bacillota_A	c__Clostridia	o__Lachnospirales	f__Lachnospiraceae	g__Dorea_A	s__Dorea_A longicatena	39923_2#180	190412	42	99.45	0.08	chain
47660_4#77_clean_bin.12.orig_cleaned	d__Bacteria	p__Bacillota_A	c__Clostridia	o__Lachnospirales	f__Lachnospiraceae	g__CAG-603	s__CAG-603 sp900066105	47660_4#77	138,663	31	100	0.19	chain
47660_4#152_clean_bin.18.strict_cleaned	d__Bacteria	p__Pseudomonadota	c__Alphaproteobacteria	o__RF32	f__CAG-239	g__RUG410	s__RUG410 sp900769705	47660_4#152	154,202	16	100	0.19	chain
38354_7#1_bin.9.orig_clean	d__Bacteria	p__Bacteroidota	c__Bacteroidia	o__Bacteroidales	f__Bacteroidaceae	g__Prevotella	s__Prevotella sp900551275	38354_7#1	122306	61	100	0.19	chain
39907_4#147_bin.6.orig_clean	d__Bacteria	p__Bacteroidota	c__Bacteroidia	o__Bacteroidales	f__Bacteroidaceae	g__Bacteroides	s__Bacteroides thetaiotaomicron	39907_4#147	198754	52	99.96	0.19	chain
40054_3#177_bin.16.orig_clean	d__Bacteria	p__Bacteroidota	c__Bacteroidia	o__Bacteroidales	f__Bacteroidaceae	g__Prevotella	s__Prevotella sp900767615	40054_3#177	100719	78	99.71	0.14	chain
47542_1#35_clean_bin.6.strict_cleaned	d__Bacteria	p__Actinomycetota	c__Coriobacteriia	o__Coriobacteriales	f__Coriobacteriaceae	g__Collinsella	s__Collinsella sp900556495	47542_1#35	275,098	17	99.24	0.05	chain
39907_4#30_bin.32.orig_clean	d__Bacteria	p__Bacteroidota	c__Bacteroidia	o__Bacteroidales	f__Coprobacteraceae	g__Coprobacter	s__Coprobacter fastidiosus	39907_4#30	148783	37	99.93	0.19	chain
40054_4#40_bin.12.strict_clean	d__Bacteria	p__Actinomycetota	c__Coriobacteriia	o__Coriobacteriales	f__Coriobacteriaceae	g__Collinsella	s__Collinsella sp900554595	40054_4#40	362502	13	99.98	0.2	chain
39907_1#66_bin.32.orig_clean	d__Bacteria	p__Bacteroidota	c__Bacteroidia	o__Bacteroidales	f__Bacteroidaceae	g__Alloprevotella	s__Alloprevotella sp900539625	39907_1#66	58096	88	99.22	0.05	chain
47542_1#130_clean_bin.34.strict_cleaned	d__Bacteria	p__Bacillota_A	c__Clostridia	o__Lachnospirales	f__Lachnospiraceae	g__Eubacterium_F	s__Eubacterium_F sp000433735	47542_1#130	89,632	42	99.87	0.18	chain
39923_1#7_bin.7.strict_clean	d__Bacteria	p__Bacillota_A	c__Clostridia	o__Clostridiales	f__Clostridiaceae	g__Sarcina	s__Sarcina perfringens	39923_1#7	280040	36	100	0.21	chain
47660_4#142_clean_bin.36.permissive_cleaned	d__Bacteria	p__Bacillota_A	c__Clostridia	o__Lachnospirales	f__Lachnospiraceae	g__Acetatifactor	s__Acetatifactor sp900066565	47660_4#142	92,942	75	99.75	0.16	chain
39907_4#155_bin.8.strict_clean	d__Bacteria	p__Bacillota_C	c__Negativicutes	o__Acidaminococcales	f__Acidaminococcaceae	g__Phascolarctobacterium_A	s__Phascolarctobacterium_A sp900753045	39907_4#155	73052	53	100	0.21	chain
40054_4#11_bin.14.strict_clean	d__Bacteria	p__Bacillota	c__Bacilli	o__Lactobacillales	f__Lactobacillaceae	g__Limosilactobacillus	s__Limosilactobacillus portuensis	40054_4#11	97531	28	99.94	0.2	chain
40054_3#168_bin.39.permissive_clean	d__Bacteria	p__Bacillota_C	c__Negativicutes	o__Acidaminococcales	f__Acidaminococcaceae	g__Phascolarctobacterium_A	s__Phascolarctobacterium_A succinatutens_A	40054_3#168	149313	42	99.71	0.16	chain
47660_4#23_clean_bin.14.orig_cleaned	d__Bacteria	p__Bacillota_C	c__Negativicutes	o__Acidaminococcales	f__Acidaminococcaceae	g__Acidaminococcus	s__Acidaminococcus sp000437815	47660_4#23	57,726	49	99.8	0.18	chain
39907_1#49_bin.12.permissive_clean	d__Bacteria	p__Bacillota_A	c__Clostridia	o__Oscillospirales	f__Acutalibacteraceae	g__Fimenecus	s__Fimenecus sp934436505	39907_1#49	173446	28	100	0.22	chain
47542_1#33_clean_bin.24.orig_cleaned	d__Bacteria	p__Actinomycetota	c__Actinomycetia	o__Actinomycetales	f__Bifidobacteriaceae	g__Bifidobacterium	s__Bifidobacterium kashiwanohense	47542_1#33	370,268	14	100	0.22	chain
39923_3#183_bin.4.strict_clean	d__Bacteria	p__Bacillota	c__Bacilli	o__Lactobacillales	f__Enterococcaceae	g__Enterococcus_B	s__Enterococcus_B faecium	39923_3#183	29686	126	99.98	0.22	chain
40054_2#62_bin.1.strict_clean	d__Bacteria	p__Bacillota_A	c__Clostridia	o__Lachnospirales	f__Anaerotignaceae	g__Anaerotignum	s__Anaerotignum faecicola	40054_2#62	140582	35	99.97	0.22	chain
47660_4#175_clean_bin.35.strict_cleaned	d__Bacteria	p__Bacillota_A	c__Clostridia	o__Lachnospirales	f__Lachnospiraceae	g__Butyrivibrio_A	s__Butyrivibrio_A sp000431815	47660_4#175	277,616	23	99.41	0.11	chain
47680_3#22_clean_bin.2.permissive_cleaned	d__Bacteria	p__Bacteroidota	c__Bacteroidia	o__Bacteroidales	f__Bacteroidaceae	g__Prevotella	s__Prevotella salivae	47680_3#22	197,904	35	99.85	0.2	chain
39923_2#170_bin.16.orig_clean	d__Bacteria	p__Bacillota	c__Bacilli	o__Lactobacillales	f__Lactobacillaceae	g__Limosilactobacillus	s__Limosilactobacillus reuteri_E	39923_2#170	20946	133	99.85	0.2	chain
39923_4#168_bin.14.strict_clean	d__Bacteria	p__Bacillota	c__Bacilli	o__Lactobacillales	f__Streptococcaceae	g__Lactococcus	s__Lactococcus lactis	39923_4#168	101705	60	100	0.23	chain
47542_1#25_clean_bin.7.strict_cleaned	d__Bacteria	p__Bacteroidota	c__Bacteroidia	o__Bacteroidales	f__Bacteroidaceae	g__Bacteroides	s__Bacteroides caccae	47542_1#25	213,111	59	99.99	0.23	chain
47660_4#30_clean_bin.1.orig_cleaned	d__Bacteria	p__Bacillota_A	c__Clostridia	o__Lachnospirales	f__Lachnospiraceae	g__Blautia_A	s__Blautia_A obeum	47660_4#30	128,835	73	99.99	0.23	chain
39923_2#168_bin.22.permissive_clean	d__Bacteria	p__Bacillota_C	c__Negativicutes	o__Veillonellales	f__Dialisteraceae	g__Dialister	s__Dialister sp900538805	39923_2#168	20077	195	99.35	0.11	chain
39923_2#168_bin.9.permissive_clean	d__Bacteria	p__Cyanobacteriota	c__Vampirovibrionia	o__Gastranaerophilales	f__Gastranaerophilaceae	g__Zag111	s__Zag111 sp002102825	39923_2#168	365886	19	99.89	0.22	chain
39907_2#94_bin.9.strict_clean	d__Bacteria	p__Bacteroidota	c__Bacteroidia	o__Bacteroidales	f__Bacteroidaceae	g__Bacteroides	s__Bacteroides fragilis_B	39907_2#94	166510	60	99.99	0.24	chain
39923_2#168_bin.23.permissive_clean	d__Bacteria	p__Bacillota_C	c__Negativicutes	o__Veillonellales	f__Dialisteraceae	g__Dialister	s__Dialister invisus	39923_2#168	77606	54	99.88	0.22	chain
39923_4#158_bin.5.orig_clean	d__Bacteria	p__Actinomycetota	c__Actinomycetia	o__Actinomycetales	f__Bifidobacteriaceae	g__Bifidobacterium	s__Bifidobacterium infantis	39923_4#158	106122	33	99.88	0.22	chain
47542_1#96_clean_bin.49.orig_cleaned	d__Bacteria	p__Bacteroidota	c__Bacteroidia	o__Bacteroidales	f__Muribaculaceae	g__Sodaliphilus	s__Sodaliphilus sp004557565	47542_1#96	38,004	117	99.95	0.24	chain
39907_1#73_bin.19.orig_clean	d__Bacteria	p__Bacteroidota	c__Bacteroidia	o__Bacteroidales	f__Bacteroidaceae	g__Prevotella	s__Prevotella hominis	39907_1#73	95416	62	99.68	0.19	chain
47542_1#190_clean_bin.21.orig_cleaned	d__Bacteria	p__Actinomycetota	c__Actinomycetia	o__Actinomycetales	f__Bifidobacteriaceae	g__Bifidobacterium	s__Bifidobacterium animalis	47542_1#190	136,047	22	99.81	0.22	chain
47542_1#62_clean_bin.9.strict_cleaned	d__Bacteria	p__Bacillota_A	c__Clostridia	o__Peptostreptococcales	f__Peptostreptococcaceae	g__Peptostreptococcus	s__Peptostreptococcus anaerobius	47542_1#62	162,422	28	99.65	0.19	chain
47680_3#6_clean_bin.15.strict_cleaned	d__Bacteria	p__Bacteroidota	c__Bacteroidia	o__Bacteroidales	f__Rikenellaceae	g__Alistipes	s__Alistipes finegoldii	47680_3#6	318,047	23	99.97	0.26	chain
39907_1#40_bin.18.strict_clean	d__Bacteria	p__Bacillota_A	c__Clostridia	o__Oscillospirales	f__Ruminococcaceae	g__Faecalibacterium	s__Faecalibacterium prausnitzii_E	39907_1#40	114645	42	99.91	0.25	chain
47542_1#134_clean_bin.15.orig_cleaned	d__Bacteria	p__Pseudomonadota	c__Alphaproteobacteria	o__RF32	f__CAG-239	g__Scatocola	s__Scatocola faecipullorum	47542_1#134	72,130	38	100	0.27	chain
47660_4#176_clean_bin.11.permissive_cleaned	d__Bacteria	p__Bacillota_A	c__Clostridia	o__Lachnospirales	f__Lachnospiraceae	g__Copromonas	s__Copromonas sp900066785	47660_4#176	111,384	61	99.1	0.09	chain
39907_3#97_bin.6.orig_clean	d__Bacteria	p__Actinomycetota	c__Coriobacteriia	o__Coriobacteriales	f__Coriobacteriaceae	g__Collinsella	s__Collinsella aerofaciens_H	39907_3#97	94857	52	99.94	0.26	chain
47542_1#144_clean_bin.22.strict_cleaned	d__Bacteria	p__Bacteroidota	c__Bacteroidia	o__Bacteroidales	f__Bacteroidaceae	g__Phocaeicola	s__Phocaeicola coprocola	47542_1#144	85,448	77	99.84	0.24	chain
47542_1#102_clean_bin.14.strict_cleaned	d__Bacteria	p__Bacillota_A	c__Clostridia	o__Lachnospirales	f__Lachnospiraceae	g__Lachnospira	s__Lachnospira rogosae	47542_1#102	106,949	32	99.97	0.27	chain
47542_1#10_clean_bin.19.strict_cleaned	d__Bacteria	p__Bacillota	c__Bacilli	o__Lactobacillales	f__Lactobacillaceae	g__Pediococcus	s__Pediococcus acidilactici	47542_1#10	115,388	24	99.99	0.28	chain
39907_1#65_bin.7.orig_clean	d__Bacteria	p__Bacteroidota	c__Bacteroidia	o__Bacteroidales	f__Bacteroidaceae	g__Paraprevotella	s__Paraprevotella clara	39907_1#65	149966	36	99.98	0.28	chain
39907_1#35_bin.26.permissive_clean	d__Bacteria	p__Cyanobacteriota	c__Vampirovibrionia	o__Gastranaerophilales	f__Gastranaerophilaceae	g__Stercorousia	s__Stercorousia sp900556295	39907_1#35	176332	15	99.96	0.28	chain
40054_3#177_bin.15.strict_clean	d__Bacteria	p__Actinomycetota	c__Coriobacteriia	o__Coriobacteriales	f__Coriobacteriaceae	g__Collinsella	s__Collinsella sp019414055	40054_3#177	470244	13	99.95	0.28	chain
47660_4#105_clean_bin.45.strict_cleaned	d__Bacteria	p__Bacillota_A	c__Clostridia	o__Oscillospirales	f__Acutalibacteraceae	g__Eubacterium_R	s__Eubacterium_R sp934525195	47660_4#105	294,716	12	99.24	0.14	chain
38222_6#4_bin.1.orig_clean	d__Bacteria	p__Bacillota_C	c__Negativicutes	o__Veillonellales	f__Dialisteraceae	g__Dialister	s__Dialister sp934178345	38222_6#4	47501	90	99.94	0.28	chain
39907_4#30_bin.30.permissive_clean	d__Bacteria	p__Verrucomicrobiota	c__Verrucomicrobiae	o__Verrucomicrobiales	f__Akkermansiaceae	g__Akkermansia	s__Akkermansia sp900545155	39907_4#30	139840	54	99.03	0.1	chain
39907_4#16_bin.14.permissive_clean	d__Bacteria	p__Spirochaetota	c__Brachyspirae	o__Brachyspirales	f__Brachyspiraceae	g__Brachyspira	s__Brachyspira pilosicoli	39907_4#16	94381	58	100	0.3	chain
47542_1#134_clean_bin.45.permissive_cleaned	d__Bacteria	p__Bacillota_A	c__Clostridia	o__Oscillospirales	f__Acutalibacteraceae	g__Eubacterium_R	s__Eubacterium_R sp900539325	47542_1#134	253,721	19	99.04	0.11	chain
39907_1#41_bin.4.strict_clean	d__Bacteria	p__Bacillota_A	c__Clostridia	o__Lachnospirales	f__Lachnospiraceae	g__Enterocloster	s__Enterocloster sp900541315	39907_1#41	53339	137	99.89	0.28	chain
47542_1#164_clean_bin.8.orig_cleaned	d__Bacteria	p__Bacillota	c__Bacilli	o__Lactobacillales	f__Lactobacillaceae	g__Limosilactobacillus	s__Limosilactobacillus gastricus	47542_1#164	131,226	45	99.97	0.3	chain
38354_2#16_bin.5.orig_clean	d__Bacteria	p__Bacillota	c__Bacilli	o__Staphylococcales	f__Staphylococcaceae	g__Staphylococcus	s__Staphylococcus hominis	38354_2#16	35864	88	98.46	0	chain
47660_4#11_clean_bin.38.strict_cleaned	d__Bacteria	p__Bacillota_A	c__Clostridia	o__Lachnospirales	f__Lachnospiraceae	g__Oliverpabstia	s__Oliverpabstia intestinalis	47660_4#11	120,778	54	99.25	0.16	chain
40054_2#62_bin.10.orig_clean	d__Bacteria	p__Bacillota_A	c__Clostridia	o__Lachnospirales	f__Lachnospiraceae	g__CAG-882	s__CAG-882 sp000435595	40054_2#62	84071	67	100	0.31	chain
38353_3#31_bin.9.strict_clean	d__Bacteria	p__Bacteroidota	c__Bacteroidia	o__Bacteroidales	f__Bacteroidaceae	g__Bacteroides	s__Bacteroides xylanisolvens	38353_3#31	54957	160	99.79	0.27	chain
47660_4#128_clean_bin.21.orig_cleaned	d__Bacteria	p__Bacillota_A	c__Clostridia	o__Oscillospirales	f__Butyricicoccaceae	g__Agathobaculum	s__Agathobaculum butyriciproducens	47660_4#128	52,354	77	100	0.32	chain
39907_4#155_bin.42.strict_clean	d__Bacteria	p__Bacillota_A	c__Clostridia	o__Oscillospirales	f__Acutalibacteraceae	g__RGIG4076	s__RGIG4076 sp905198155	39907_4#155	39985	116	99.08	0.14	chain
47660_4#39_clean_bin.24.orig_cleaned	d__Bacteria	p__Bacillota_A	c__Clostridia	o__Oscillospirales	f__Acutalibacteraceae	g__Eubacterium_R	s__Eubacterium_R sp900540235	47660_4#39	179,157	22	98.81	0.09	chain
39907_1#47_bin.2.orig_clean	d__Bacteria	p__Actinomycetota	c__Actinomycetia	o__Actinomycetales	f__Bifidobacteriaceae	g__Bifidobacterium	s__Bifidobacterium adolescentis	39907_1#47	288450	21	100	0.33	chain
47660_4#55_clean_bin.7.orig_cleaned	d__Bacteria	p__Bacillota_A	c__Clostridia	o__Oscillospirales	f__Acutalibacteraceae	g__Eubacterium_R	s__Eubacterium_R sp000436835	47660_4#55	183,631	20	98.6	0.05	chain
47660_4#149_clean_bin.13.strict_cleaned	d__Bacteria	p__Bacteroidota	c__Bacteroidia	o__Bacteroidales	f__Bacteroidaceae	g__Prevotella	s__Prevotella sp000467895	47660_4#149	99,618	54	98.59	0.05	chain
39907_1#44_bin.17.permissive_clean	d__Bacteria	p__Bacillota	c__Bacilli	o__Lactobacillales	f__Enterococcaceae	g__Enterococcus_D	s__Enterococcus_D gallinarum	39907_1#44	64485	79	99.52	0.24	chain
39907_4#36_bin.10.orig_clean	d__Bacteria	p__Bacteroidota	c__Bacteroidia	o__Bacteroidales	f__Bacteroidaceae	g__Prevotella	s__Prevotella sp002299635	39907_4#36	57562	77	99.3	0.2	chain
39907_1#62_bin.1.strict_clean	d__Bacteria	p__Bacteroidota	c__Bacteroidia	o__Bacteroidales	f__Tannerellaceae	g__Parabacteroides	s__Parabacteroides sp900549585	39907_1#62	50912	108	98.38	0.02	chain
39907_4#155_bin.38.orig_clean	d__Bacteria	p__Bacillota_A	c__Clostridia	o__Monoglobales	f__Monoglobaceae	g__UMGS1820	s__UMGS1820 sp900555375	39907_4#155	126063	34	98.77	0.1	chain
39923_4#184_bin.10.strict_clean	d__Bacteria	p__Bacillota_C	c__Negativicutes	o__Veillonellales	f__Veillonellaceae	g__Veillonella	s__Veillonella sp934183145	39923_4#184	15740	172	99.34	0.22	chain
38354_8#28_bin.17.permissive_clean	d__Bacteria	p__Bacillota_A	c__Clostridia	o__Oscillospirales	f__Acutalibacteraceae	g__Fimenecus	s__Fimenecus sp000432435	38354_8#28	140795	29	98.22	0	chain
47660_4#169_clean_bin.40.strict_cleaned	d__Bacteria	p__Bacillota_A	c__Clostridia	o__Lachnospirales	f__Lachnospiraceae	g__CAG-95	s__CAG-95 sp900066375	47660_4#169	159,724	33	99.56	0.27	chain
47542_1#111_clean_bin.24.orig_cleaned	d__Bacteria	p__Bacillota_A	c__Clostridia	o__Oscillospirales	f__Ruminococcaceae	g__CAG-353	s__CAG-353 sp900768995	47542_1#111	95,097	50	99.96	0.35	chain
39907_1#67_bin.10.orig_clean	d__Bacteria	p__Bacillota_A	c__Clostridia	o__Lachnospirales	f__Lachnospiraceae	g__Eisenbergiella	s__Eisenbergiella sp900066775	39907_1#67	52152	73	99.12	0.19	chain
47660_4#105_clean_bin.26.orig_cleaned	d__Bacteria	p__Bacillota_A	c__Clostridia	o__Lachnospirales	f__Lachnospiraceae	g__UMGS2037	s__UMGS2037 sp934371505	47660_4#105	107,215	52	99.85	0.34	chain
47660_4#105_clean_bin.35.permissive_cleaned	d__Bacteria	p__Pseudomonadota	c__Alphaproteobacteria	o__RF32	f__CAG-239	g__RUG410	s__RUG410 sp934229625	47660_4#105	29,655	84	99.08	0.19	chain
39907_3#82_bin.5.permissive_clean	d__Bacteria	p__Bacteroidota	c__Bacteroidia	o__Bacteroidales	f__Bacteroidaceae	g__Bacteroides	s__Bacteroides ovatus	39907_3#82	176554	54	99.72	0.32	chain
40054_3#173_bin.1.orig_clean	d__Bacteria	p__Bacillota_A	c__Clostridia	o__Tissierellales	f__Peptoniphilaceae	g__Anaerococcus	s__Anaerococcus vaginalis_C	40054_3#173	116386	36	99.22	0.22	chain
47660_4#110_clean_bin.16.strict_cleaned	d__Bacteria	p__Bacillota	c__Bacilli	o__Erysipelotrichales	f__Coprobacillaceae	g__Catenibacterium	s__Catenibacterium sp000437715	47660_4#110	36,038	88	100	0.38	chain
39923_2#176_bin.16.strict_clean	d__Bacteria	p__Campylobacterota	c__Campylobacteria	o__Campylobacterales	f__Helicobacteraceae	g__Helicobacter_C	s__Helicobacter_C cinaedi	39923_2#176	184173	23	99.99	0.38	chain
47542_1#113_clean_bin.19.permissive_cleaned	d__Bacteria	p__Bacteroidota	c__Bacteroidia	o__Bacteroidales	f__Rikenellaceae	g__Alistipes	s__Alistipes onderdonkii	47542_1#113	348,305	31	98.79	0.14	chain
39907_4#36_bin.1.orig_clean	d__Bacteria	p__Spirochaetota	c__Spirochaetia	o__Treponematales	f__Treponemataceae	g__Treponema_D	s__Treponema_D succinifaciens	39907_4#36	185566	30	99.95	0.38	chain
40054_3#169_bin.4.permissive_clean	d__Bacteria	p__Bacillota	c__Bacilli	o__Lactobacillales	f__Lactobacillaceae	g__Lactiplantibacillus	s__Lactiplantibacillus plantarum	40054_3#169	139109	41	100	0.39	chain
47542_1#119_clean_bin.3.strict_cleaned	d__Bacteria	p__Bacillota_A	c__Clostridia	o__Oscillospirales	f__Ruminococcaceae	g__Faecalibacterium	s__Faecalibacterium prausnitzii_A	47542_1#119	149,697	44	99.44	0.28	chain
39907_1#49_bin.13.orig_clean	d__Bacteria	p__Bacillota_A	c__Clostridia	o__Oscillospirales	f__Acutalibacteraceae	g__CAG-964	s__CAG-964 sp000435335	39907_1#49	99760	30	99.14	0.22	chain
40054_2#178_bin.7.strict_clean	d__Bacteria	p__Bacillota_A	c__Clostridia	o__Lachnospirales	f__Lachnospiraceae	g__Lachnospira	s__Lachnospira eligens_A	40054_2#178	184648	27	99.98	0.39	chain
47680_3#6_clean_bin.2.orig_cleaned	d__Bacteria	p__Bacillota_A	c__Clostridia	o__Lachnospirales	f__Lachnospiraceae	g__Oliverpabstia	s__Oliverpabstia faecicola	47680_3#6	208,533	32	99.82	0.36	chain
39907_1#54_bin.21.permissive_clean	d__Bacteria	p__Bacillota_A	c__Clostridia	o__Peptostreptococcales	f__Peptostreptococcaceae	g__Clostridioides	s__Clostridioides difficile	39907_1#54	184725	44	99.8	0.36	chain
47680_3#45_clean_bin.11.strict_cleaned	d__Bacteria	p__Pseudomonadota	c__Gammaproteobacteria	o__Burkholderiales	f__Burkholderiaceae_A	g__Sutterella	s__Sutterella wadsworthensis_A	47680_3#45	38,825	122	99.99	0.4	chain
39907_1#51_bin.3.orig_clean	d__Bacteria	p__Bacillota_A	c__Clostridia	o__Oscillospirales	f__Butyricicoccaceae	g__Agathobaculum	s__Agathobaculum sp934504345	39907_1#51	26281	117	98.16	0.04	chain
39907_1#65_bin.43.strict_clean	d__Bacteria	p__Pseudomonadota	c__Gammaproteobacteria	o__Burkholderiales	f__Rhodocyclaceae	g__SFHR01	s__SFHR01 sp934271525	39907_1#65	110977	24	99.7	0.35	chain
39907_1#65_bin.20.orig_clean	d__Bacteria	p__Bacteroidota	c__Bacteroidia	o__Bacteroidales	f__Rikenellaceae	g__Alistipes	s__Alistipes shahii	39907_1#65	217581	27	99.88	0.39	chain
47542_1#10_clean_bin.2.orig_cleaned	d__Bacteria	p__Bacillota	c__Bacilli	o__Lactobacillales	f__Lactobacillaceae	g__Limosilactobacillus	s__Limosilactobacillus reuteri	47542_1#10	52,865	57	99.77	0.37	chain
40054_2#180_bin.7.orig_clean	d__Bacteria	p__Bacteroidota	c__Bacteroidia	o__Bacteroidales	f__Tannerellaceae	g__Parabacteroides	s__Parabacteroides distasonis	40054_2#180	164294	50	99.98	0.42	chain
40054_2#177_bin.5.orig_clean	d__Bacteria	p__Bacillota_A	c__Clostridia	o__Lachnospirales	f__Lachnospiraceae	g__Blautia_A	s__Blautia_A sp003471165	40054_2#177	96430	73	98.47	0.12	chain
47660_4#13_clean_bin.7.strict_cleaned	d__Bacteria	p__Cyanobacteriota	c__Vampirovibrionia	o__Gastranaerophilales	f__Gastranaerophilaceae	g__UBA1221	s__UBA1221 sp900770525	47660_4#13	126,400	27	99.76	0.39	chain
40054_2#177_bin.14.orig_clean	d__Bacteria	p__Bacteroidota	c__Bacteroidia	o__Bacteroidales	f__Bacteroidaceae	g__Prevotella	s__Prevotella sp900556795	40054_2#177	95576	80	99.99	0.44	chain
40054_4#13_bin.10.orig_clean	d__Bacteria	p__Bacillota_A	c__Clostridia	o__Lachnospirales	f__Lachnospiraceae	g__Roseburia	s__Roseburia hominis	40054_4#13	142102	33	99.84	0.42	chain
38354_2#16_bin.2.strict_clean	d__Bacteria	p__Actinomycetota	c__Actinomycetia	o__Actinomycetales	f__Bifidobacteriaceae	g__Bifidobacterium	s__Bifidobacterium pseudocatenulatum	38354_2#16	265243	15	99.99	0.46	chain
47660_4#141_clean_bin.10.permissive_cleaned	d__Bacteria	p__Bacillota_A	c__Clostridia	o__Oscillospirales	f__Ruminococcaceae	g__Angelakisella	s__Angelakisella sp900547385	47660_4#141	59,213	68	98.53	0.17	chain
40054_2#62_bin.28.orig_clean	d__Bacteria	p__Bacillota_A	c__Clostridia	o__Lachnospirales	f__Lachnospiraceae	g__CAG-45	s__CAG-45 sp000438375	40054_2#62	226036	27	99.86	0.44	chain
40054_3#168_bin.12.strict_clean	d__Bacteria	p__Pseudomonadota	c__Alphaproteobacteria	o__RF32	f__CAG-239	g__RUG410	s__RUG410 sp900553115	40054_3#168	209778	12	100	0.48	chain
47680_3#20_clean_bin.12.permissive_cleaned	d__Bacteria	p__Bacillota_A	c__Clostridia	o__TANB77	f__CAG-508	g__CAG-793	s__CAG-793 sp000433915	47680_3#20	372,496	18	100	0.48	chain
47660_4#85_clean_bin.5.strict_cleaned	d__Bacteria	p__Bacillota	c__Bacilli	o__Lactobacillales	f__Streptococcaceae	g__Streptococcus	s__Streptococcus thermophilus	47660_4#85	55,383	50	99.19	0.33	chain
47660_4#39_clean_bin.23.permissive_cleaned	d__Bacteria	p__Bacillota	c__Bacilli	o__Lactobacillales	f__Streptococcaceae	g__Streptococcus	s__Streptococcus macedonicus	47660_4#39	159,807	27	99.99	0.49	chain
39907_4#147_bin.28.permissive_clean	d__Bacteria	p__Bacteroidota	c__Bacteroidia	o__Bacteroidales	f__Rikenellaceae	g__Alistipes_A	s__Alistipes_A sp900539755	39907_4#147	60057	67	98.37	0.17	chain
39923_2#166_bin.23.strict_clean	d__Bacteria	p__Bacillota	c__Bacilli	o__Erysipelotrichales	f__Coprobacillaceae	g__Catenibacterium	s__Catenibacterium mitsuokai	39923_2#166	31782	106	99.51	0.4	chain
47660_4#64_clean_bin.20.permissive_cleaned	d__Bacteria	p__Bacillota_A	c__Clostridia	o__Oscillospirales	f__Acutalibacteraceae	g__Eubacterium_R	s__Eubacterium_R sp000433975	47660_4#64	156,350	19	98.75	0.25	chain
39923_4#38_bin.22.orig_clean	d__Bacteria	p__Actinomycetota	c__Coriobacteriia	o__Coriobacteriales	f__Eggerthellaceae	g__Slackia_A	s__Slackia_A isoflavoniconvertens	39923_4#38	77137	49	98.66	0.24	chain
39907_4#155_bin.44.strict_clean	d__Bacteria	p__Bacillota_A	c__Clostridia	o__Lachnospirales	f__Lachnospiraceae	g__Mediterraneibacter	s__Mediterraneibacter sp934309345	39907_4#155	65210	101	99.9	0.51	chain
47660_4#145_clean_bin.24.strict_cleaned	d__Bacteria	p__Bacillota_A	c__Clostridia	o__Oscillospirales	f__Acutalibacteraceae	g__Eubacterium_R	s__Eubacterium_R sp900542875	47660_4#145	180,383	19	99.34	0.4	chain
47542_1#96_clean_bin.15.orig_cleaned	d__Bacteria	p__Bacillota_A	c__Clostridia	o__Christensenellales	f__CAG-917	g__CAG-349	s__CAG-349 sp003539515	47542_1#96	484,613	6	97.58	0.06	chain
40054_2#62_bin.31.permissive_clean	d__Bacteria	p__Bacillota_A	c__Clostridia	o__Peptostreptococcales	f__Peptostreptococcaceae	g__Intestinibacter	s__Intestinibacter bartlettii	40054_2#62	52144	105	99.69	0.49	chain
47660_4#78_clean_bin.6.permissive_cleaned	d__Bacteria	p__Actinomycetota	c__Coriobacteriia	o__Coriobacteriales	f__Coriobacteriaceae	g__Collinsella	s__Collinsella sp900542825	47660_4#78	180,587	28	99.98	0.55	chain
47542_1#31_clean_bin.2.strict_cleaned	d__Bacteria	p__Actinomycetota	c__Coriobacteriia	o__Coriobacteriales	f__Coriobacteriaceae	g__Collinsella	s__Collinsella sp900754075	47542_1#31	203,652	26	99.98	0.55	chain
40054_2#58_bin.30.orig_clean	d__Bacteria	p__Bacillota_A	c__Clostridia	o__Oscillospirales	f__Ruminococcaceae	g__Gemmiger	s__Gemmiger sp900539695	40054_2#58	79023	51	99.62	0.48	chain
39923_3#21_bin.12.strict_clean	d__Bacteria	p__Pseudomonadota	c__Gammaproteobacteria	o__Enterobacterales_A	f__Pasteurellaceae	g__Haemophilus_D	s__Haemophilus_D sp900756875	39923_3#21	121569	28	99.93	0.55	chain
39907_1#57_bin.2.permissive_clean	d__Bacteria	p__Bacillota_C	c__Negativicutes	o__Veillonellales	f__Dialisteraceae	g__Dialister	s__Dialister succinatiphilus	39907_1#57	50866	130	99.9	0.55	chain
47542_1#148_clean_bin.19.orig_cleaned	d__Bacteria	p__Bacillota_A	c__Clostridia	o__Oscillospirales	f__Butyricicoccaceae	g__Agathobaculum	s__Agathobaculum sp003481705	47542_1#148	12,977	212	98.65	0.3	chain
47680_3#1_clean_bin.9.orig_cleaned	d__Bacteria	p__Bacillota_A	c__Clostridia	o__Lachnospirales	f__Lachnospiraceae	g__Anaerostipes	s__Anaerostipes sp900066705	47680_3#1	86,921	92	99.44	0.46	chain
40054_3#150_bin.6.permissive_clean	d__Bacteria	p__Actinomycetota	c__Coriobacteriia	o__Coriobacteriales	f__Atopobiaceae	g__Parolsenella	s__Parolsenella uli_B	40054_3#150	344166	25	97.79	0.14	chain
39907_1#35_bin.6.orig_clean	d__Bacteria	p__Pseudomonadota	c__Gammaproteobacteria	o__Enterobacterales_A	f__Succinivibrionaceae	g__Succinivibrio	s__Succinivibrio sp000431835	39907_1#35	173155	32	97.88	0.16	chain
47542_1#62_clean_bin.8.orig_cleaned	d__Bacteria	p__Actinomycetota	c__Actinomycetia	o__Actinomycetales	f__Actinomycetaceae	g__Pauljensenia	s__Pauljensenia sp900556405	47542_1#62	75,607	45	99.99	0.59	chain
39923_4#50_bin.44.orig_clean	d__Bacteria	p__Bacillota_A	c__Clostridia	o__Oscillospirales	f__Oscillospiraceae	g__Faecousia	s__Faecousia sp900549705	39923_4#50	65522	75	97.67	0.13	chain
40054_3#173_bin.14.strict_clean	d__Bacteria	p__Bacillota_A	c__Clostridia	o__Tissierellales	f__Peptoniphilaceae	g__Peptoniphilus_A	s__Peptoniphilus_A harei	40054_3#173	66028	60	98.84	0.37	chain
47660_4#20_clean_bin.28.permissive_cleaned	d__Bacteria	p__Actinomycetota	c__Coriobacteriia	o__Coriobacteriales	f__Coriobacteriaceae	g__Collinsella	s__Collinsella sp934630375	47660_4#20	231,822	30	99.88	0.58	chain
40054_2#68_bin.19.orig_clean	d__Bacteria	p__Bacillota_A	c__Clostridia	o__Oscillospirales	f__Acutalibacteraceae	g__Eubacterium_R	s__Eubacterium_R sp900539165	40054_2#68	521927	8	97.78	0.16	chain
38755_3#15_bin.8.strict_clean	d__Bacteria	p__Bacillota_A	c__Clostridia	o__Lachnospirales	f__Lachnospiraceae	g__KLE1615	s__KLE1615 sp900066985	38755_3#15	58191	133	98.91	0.39	chain
47542_1#113_clean_bin.16.orig_cleaned	d__Bacteria	p__Bacillota_A	c__Clostridia	o__TANB77	f__CAG-508	g__CAG-269	s__CAG-269 sp003525075	47542_1#113	151,440	17	99.56	0.53	chain
39923_4#156_bin.16.orig_clean	d__Bacteria	p__Bacillota_A	c__Clostridia	o__Oscillospirales	f__Ruminococcaceae	g__Faecalibacterium	s__Faecalibacterium prausnitzii_D	39923_4#156	253513	21	99.65	0.55	chain
38353_8#21_bin.31.orig_clean	d__Bacteria	p__Bacillota	c__Bacilli	o__Erysipelotrichales	f__Coprobacillaceae	g__Catenibacterium	s__Catenibacterium sp900764565	38353_8#21	40197	97	100	0.63	chain
47680_3#10_clean_bin.7.strict_cleaned	d__Bacteria	p__Bacillota	c__Bacilli	o__Erysipelotrichales	f__Coprobacillaceae	g__Faecalibacillus	s__Faecalibacillus intestinalis	47680_3#10	112,334	44	99.45	0.52	chain
39907_1#1_bin.29.orig_clean	d__Bacteria	p__Bacillota_A	c__Clostridia	o__Oscillospirales	f__CAG-272	g__UMGS902	s__UMGS902 sp934467415	39907_1#1	75784	46	98.49	0.33	chain
47660_4#107_clean_bin.16.permissive_cleaned	d__Archaea	p__Methanobacteriota	c__Methanobacteria	o__Methanobacteriales	f__Methanobacteriaceae	g__Methanobrevibacter_A	s__Methanobrevibacter_A smithii_A	47660_4#107	28,907	87	98.79	0.39	chain
40054_3#160_bin.24.strict_clean	d__Bacteria	p__Bacillota_A	c__Clostridia	o__Monoglobales	f__Monoglobaceae	g__UMGS1820	s__UMGS1820 sp905201285	40054_3#160	20033	163	97.59	0.15	chain
40054_2#69_bin.7.permissive_clean	d__Bacteria	p__Actinomycetota	c__Coriobacteriia	o__Coriobacteriales	f__Eggerthellaceae	g__Eggerthella	s__Eggerthella timonensis	40054_2#69	60573	122	99.33	0.5	chain
47680_3#18_clean_bin.13.permissive_cleaned	d__Bacteria	p__Bacteroidota	c__Bacteroidia	o__Bacteroidales	f__Muribaculaceae	g__UBA7173	s__UBA7173 sp910584365	47680_3#18	112,155	55	96.95	0.03	chain
47660_4#109_clean_bin.15.strict_cleaned	d__Bacteria	p__Bacillota_A	c__Clostridia	o__Lachnospirales	f__Lachnospiraceae	g__Anaerostipes	s__Anaerostipes sp018918155	47660_4#109	98,402	63	99.7	0.58	chain
47660_4#114_clean_bin.17.permissive_cleaned	d__Bacteria	p__Bacteroidota	c__Bacteroidia	o__Bacteroidales	f__Bacteroidaceae	g__Prevotella	s__Prevotella sp934230115	47660_4#114	93,893	98	98.88	0.42	chain
39923_2#180_bin.15.orig_clean	d__Bacteria	p__Verrucomicrobiota	c__Lentisphaeria	o__Victivallales	f__UBA1829	g__UBA1829	s__UBA1829 sp900549415	39923_2#180	50297	123	98.39	0.33	chain
47542_1#96_clean_bin.25.orig_cleaned	d__Bacteria	p__Elusimicrobiota	c__Elusimicrobia	o__Elusimicrobiales	f__Elusimicrobiaceae	g__UBA1436	s__UBA1436 sp900541355	47542_1#96	198,729	11	97.69	0.2	chain
47542_1#189_clean_bin.19.orig_cleaned	d__Bacteria	p__Bacillota_A	c__Clostridia	o__Lachnospirales	f__Lachnospiraceae	g__Ventrimonas	s__Ventrimonas sp900555625	47542_1#189	92,828	48	98.13	0.29	chain
40054_3#168_bin.36.orig_clean	d__Bacteria	p__Bacillota_A	c__Clostridia	o__Oscillospirales	f__Acutalibacteraceae	g__Eubacterium_R	s__Eubacterium_R sp900539775	40054_3#168	33842	85	97.77	0.22	chain
47660_4#97_clean_bin.25.permissive_cleaned	d__Bacteria	p__Bacillota_A	c__Clostridia	o__Lachnospirales	f__Lachnospiraceae	g__Enterocloster	s__Enterocloster sp900538485	47660_4#97	60,313	67	98.02	0.27	chain
40054_3#160_bin.37.strict_clean	d__Bacteria	p__Bacillota_A	c__Clostridia	o__Oscillospirales	f__Acutalibacteraceae	g__Ruminococcus_E	s__Ruminococcus_E bromii_B	40054_3#160	184969	23	99.99	0.67	chain
47660_4#76_clean_bin.13.strict_cleaned	d__Bacteria	p__Bacillota	c__Bacilli	o__Lactobacillales	f__Lactobacillaceae	g__Weissella	s__Weissella confusa	47660_4#76	55,291	72	99.94	0.66	chain
39907_4#9_bin.25.orig_clean	d__Bacteria	p__Bacteroidota	c__Bacteroidia	o__Bacteroidales	f__Bacteroidaceae	g__Alloprevotella	s__Alloprevotella sp015257125	39907_4#9	114103	33	97.44	0.17	chain
38353_3#20_bin.5.orig_clean	d__Bacteria	p__Bacillota_A	c__Clostridia	o__Lachnospirales	f__Lachnospiraceae	g__Anaerostipes	s__Anaerostipes caccae	38353_3#20	248513	38	99.08	0.5	chain
47660_4#147_clean_bin.17.permissive_cleaned	d__Bacteria	p__Bacillota_C	c__Negativicutes	o__Acidaminococcales	f__Acidaminococcaceae	g__Phascolarctobacterium_A	s__Phascolarctobacterium_A sp900551335	47660_4#147	122,118	43	99.47	0.58	chain
38353_8#21_bin.44.orig_clean	d__Bacteria	p__Bacillota_A	c__Clostridia	o__Oscillospirales	f__Acutalibacteraceae	g__CAG-177	s__CAG-177 sp003514385	38353_8#21	78778	38	98.21	0.33	chain
39923_4#54_bin.3.orig_clean	d__Bacteria	p__Bacillota	c__Bacilli	o__Lactobacillales	f__Lactobacillaceae	g__Leuconostoc	s__Leuconostoc falkenbergense	39923_4#54	111083	27	99.96	0.68	chain
39907_1#5_bin.13.permissive_clean	d__Bacteria	p__Bacillota_A	c__Clostridia	o__Oscillospirales	f__Ruminococcaceae	g__Ruthenibacterium	s__Ruthenibacterium lactatiformans	39907_1#5	43101	125	98.03	0.3	chain
47660_4#63_clean_bin.2.permissive_cleaned	d__Bacteria	p__Bacillota_A	c__Clostridia	o__Lachnospirales	f__Lachnospiraceae	g__Roseburia	s__Roseburia intestinalis	47660_4#63	143,871	62	99.96	0.69	chain
39923_4#38_bin.20.orig_clean	d__Bacteria	p__Bacillota_C	c__Negativicutes	o__Acidaminococcales	f__Acidaminococcaceae	g__Phascolarctobacterium_A	s__Phascolarctobacterium_A sp022718015	39923_4#38	205852	18	98.9	0.48	chain
47660_4#169_clean_bin.35.orig_cleaned	d__Bacteria	p__Bacillota_A	c__Clostridia	o__Oscillospirales	f__Acutalibacteraceae	g__Eubacterium_R	s__Eubacterium_R sp900548085	47660_4#169	187,548	24	98.29	0.36	chain
47660_4#11_clean_bin.1.strict_cleaned	d__Bacteria	p__Bacillota_A	c__Clostridia	o__Lachnospirales	f__Lachnospiraceae	g__Anaerostipes	s__Anaerostipes hadrus	47660_4#11	53,861	74	99.23	0.55	chain
47680_3#6_clean_bin.11.orig_cleaned	d__Bacteria	p__Bacillota_A	c__Clostridia	o__Lachnospirales	f__Lachnospiraceae	g__KLE1615	s__KLE1615 sp934292725	47680_3#6	97,563	63	98.11	0.33	chain
39923_3#38_bin.23.orig_clean	d__Bacteria	p__Bacillota_A	c__Clostridia	o__Lachnospirales	f__Lachnospiraceae	g__Anaerostipes	s__Anaerostipes hadrus_A	39923_3#38	173015	27	99.06	0.53	chain
47542_1#130_clean_bin.7.orig_cleaned	d__Bacteria	p__Bacillota_A	c__Clostridia	o__Lachnospirales	f__Lachnospiraceae	g__Lachnospira	s__Lachnospira eligens	47542_1#130	136,088	37	99.89	0.7	chain
40054_2#64_bin.20.strict_clean	d__Bacteria	p__Bacillota_A	c__Clostridia	o__Oscillospirales	f__Acutalibacteraceae	g__Pseudoruminococcus	s__Pseudoruminococcus massiliensis	40054_2#64	123739	54	99.73	0.67	chain
39907_1#1_bin.24.strict_clean	d__Bacteria	p__Bacillota_A	c__Clostridia	o__Oscillospirales	f__CAG-272	g__CAG-390	s__CAG-390 sp000437015	39907_1#1	319371	30	97.09	0.15	chain
39907_3#75_bin.16.orig_clean	d__Bacteria	p__Bacillota_A	c__Clostridia	o__Oscillospirales	f__Butyricicoccaceae	g__Butyricicoccus	s__Butyricicoccus pullicaecorum	39907_3#75	65468	91	97.17	0.17	chain
39907_4#36_bin.23.orig_clean	d__Bacteria	p__Bacteroidota	c__Bacteroidia	o__Bacteroidales	f__Bacteroidaceae	g__UBA6398	s__UBA6398 sp003150315	39907_4#36	83612	74	96.5	0.04	chain
39907_1#62_bin.4.permissive_clean	d__Bacteria	p__Bacillota_A	c__Clostridia	o__Christensenellales	f__CAG-138	g__PeH17	s__PeH17 sp000435055	39907_1#62	95458	37	98.04	0.35	chain
47542_1#111_clean_bin.53.orig_cleaned	d__Bacteria	p__Bacillota_A	c__Clostridia	o__Lachnospirales	f__Lachnospiraceae	g__14-2	s__14-2 sp012519695	47542_1#111	150,664	32	99.99	0.74	chain
39907_1#46_bin.2.orig_clean	d__Bacteria	p__Bacillota	c__Bacilli	o__Staphylococcales	f__Staphylococcaceae	g__Staphylococcus	s__Staphylococcus aureus	39907_1#46	168832	30	100	0.75	chain
39923_2#180_bin.42.orig_clean	d__Bacteria	p__Bacillota_A	c__Clostridia	o__Oscillospirales	f__Butyricicoccaceae	g__Pseudobutyricicoccus	s__Pseudobutyricicoccus sp003477405	39923_2#180	24040	156	97.49	0.25	chain
39907_1#47_bin.15.orig_clean	d__Bacteria	p__Actinomycetota	c__Coriobacteriia	o__Coriobacteriales	f__Atopobiaceae	g__Paratractidigestivibacter	s__Paratractidigestivibacter faecalis	39907_1#47	288927	11	98.1	0.38	chain
47660_4#160_clean_bin.27.orig_cleaned	d__Bacteria	p__Bacillota_A	c__Clostridia	o__Oscillospirales	f__Acutalibacteraceae	g__Ruminococcus_E	s__Ruminococcus_E sp003526955	47660_4#160	74,365	54	99.74	0.71	chain
47660_4#141_clean_bin.7.strict_cleaned	d__Bacteria	p__Bacillota_A	c__Clostridia	o__Oscillospirales	f__Oscillospiraceae	g__CAG-170	s__CAG-170 sp000436735	47660_4#141	106,579	72	97.71	0.31	chain
47660_4#6_clean_bin.8.orig_cleaned	d__Bacteria	p__Bacillota_A	c__Clostridia	o__TANB77	f__CAG-508	g__CAG-245	s__CAG-245 sp000435175	47660_4#6	51,917	44	99.3	0.63	chain
47660_4#97_clean_bin.28.permissive_cleaned	d__Bacteria	p__Bacillota_A	c__Clostridia	o__Lachnospirales	f__Lachnospiraceae	g__Dorea	s__Dorea formicigenerans	47660_4#97	53,725	166	100	0.77	chain
40054_2#64_bin.38.orig_clean	d__Bacteria	p__Bacillota_A	c__Clostridia	o__Oscillospirales	f__Oscillospiraceae	g__Vescimonas	s__Vescimonas sp000435975	40054_2#64	141707	25	97.04	0.18	chain
39923_3#175_bin.23.orig_clean	d__Bacteria	p__Bacillota_A	c__Clostridia	o__Oscillospirales	f__Oscillospiraceae	g__ER4	s__ER4 sp000765235	39923_3#175	59154	62	97.18	0.21	chain
40054_2#64_bin.3.strict_clean	d__Bacteria	p__Bacillota_A	c__Clostridia	o__Oscillospirales	f__Oscillospiraceae	g__Vescimonas	s__Vescimonas sp900547745	40054_2#64	81322	47	96.56	0.09	chain
47660_4#11_clean_bin.9.orig_cleaned	d__Bacteria	p__Bacillota_A	c__Clostridia	o__TANB77	f__CAG-508	g__UMGS1663	s__UMGS1663 sp934153805	47660_4#11	156,010	18	100	0.78	chain
39923_4#50_bin.24.strict_clean	d__Bacteria	p__Bacillota_A	c__Clostridia	o__Christensenellales	f__CAG-74	g__Ventricola	s__Ventricola sp900548125	39923_4#50	31408	180	97.23	0.24	chain
47660_4#69_clean_bin.16.orig_cleaned	d__Bacteria	p__Bacillota_A	c__Clostridia	o__Lachnospirales	f__Lachnospiraceae	g__Hominisplanchenecus	s__Hominisplanchenecus faecis	47660_4#69	36,937	103	96.63	0.12	chain
39923_4#59_bin.15.orig_clean	d__Bacteria	p__Cyanobacteriota	c__Vampirovibrionia	o__Gastranaerophilales	f__Gastranaerophilaceae	g__Zag111	s__Zag111 sp003258735	39923_4#59	131912	19	96.86	0.17	chain
39907_1#42_bin.13.orig_clean	d__Bacteria	p__Bacteroidota	c__Bacteroidia	o__Bacteroidales	f__Bacteroidaceae	g__Prevotella	s__Prevotella copri_C	39907_1#42	83885	84	99.63	0.73	chain
47660_4#72_clean_bin.3.strict_cleaned	d__Bacteria	p__Bacillota_A	c__Clostridia	o__Oscillospirales	f__Ruminococcaceae	g__Gemmiger	s__Gemmiger variabilis_B	47660_4#72	95,825	62	99.97	0.8	chain
47680_3#48_clean_bin.30.orig_cleaned	d__Bacteria	p__Bacillota_A	c__Clostridia	o__Lachnospirales	f__Lachnospiraceae	g__Blautia	s__Blautia stercoris	47680_3#48	42,492	102	96.77	0.17	chain
40054_4#45_bin.6.orig_clean	d__Bacteria	p__Bacteroidota	c__Bacteroidia	o__Bacteroidales	f__Bacteroidaceae	g__Bacteroides	s__Bacteroides intestinalis	40054_4#45	39309	240	99.1	0.64	chain
47660_4#11_clean_bin.2.orig_cleaned	d__Bacteria	p__Bacillota_A	c__Clostridia	o__Lachnospirales	f__Lachnospiraceae	g__Anaerobutyricum	s__Anaerobutyricum soehngenii	47660_4#11	51,276	107	99.99	0.82	chain
47542_1#180_clean_bin.20.strict_cleaned	d__Bacteria	p__Bacillota	c__Bacilli	o__Lactobacillales	f__Streptococcaceae	g__Streptococcus	s__Streptococcus sp003521145	47542_1#180	22,287	116	99.1	0.65	chain
47660_4#167_clean_bin.22.orig_cleaned	d__Bacteria	p__Bacillota_A	c__Clostridia	o__Oscillospirales	f__Oscillospiraceae	g__Evtepia	s__Evtepia sp004556345	47660_4#167	79,306	53	99.58	0.75	chain
47680_3#54_clean_bin.4.permissive_cleaned	d__Bacteria	p__Bacillota_A	c__Clostridia	o__TANB77	f__CAG-508	g__CAG-245	s__CAG-245 sp934131055	47680_3#54	68,754	33	99.15	0.67	chain
47660_4#129_clean_bin.11.orig_cleaned	d__Bacteria	p__Bacillota	c__Bacilli	o__Erysipelotrichales	f__Erysipelotrichaceae	g__Holdemanella	s__Holdemanella biformis	47660_4#129	32,303	98	98.4	0.52	chain
39907_1#73_bin.3.orig_clean	d__Bacteria	p__Bacteroidota	c__Bacteroidia	o__Bacteroidales	f__Bacteroidaceae	g__Prevotella	s__Prevotella sp021636625	39907_1#73	67422	80	95.88	0.02	chain
40054_2#66_bin.23.permissive_clean	d__Bacteria	p__Bacteroidota	c__Bacteroidia	o__Bacteroidales	f__UBA932	g__Cryptobacteroides	s__Cryptobacteroides sp000435075	40054_2#66	98951	55	96.51	0.15	chain
47542_1#180_clean_bin.21.orig_cleaned	d__Bacteria	p__Actinomycetota	c__Coriobacteriia	o__Coriobacteriales	f__Coriobacteriaceae	g__Collinsella	s__Collinsella sp934654835	47542_1#180	114,168	37	99.9	0.83	chain
38222_6#4_bin.9.orig_clean	d__Bacteria	p__Bacillota_A	c__Clostridia	o__Oscillospirales	f__Ruminococcaceae	g__Faecalibacterium	s__Faecalibacterium sp900539885	38222_6#4	195775	32	99.98	0.85	chain
39923_2#180_bin.20.orig_clean	d__Bacteria	p__Bacillota_A	c__Clostridia	o__Oscillospirales	f__Oscillospiraceae	g__Vescimonas	s__Vescimonas sp900552475	39923_2#180	80555	43	98.12	0.48	chain
39907_1#42_bin.11.strict_clean	d__Bacteria	p__Bacteroidota	c__Bacteroidia	o__Bacteroidales	f__Bacteroidaceae	g__Prevotella	s__Prevotella sp900546535	39907_1#42	68087	100	96.41	0.14	chain
47660_4#141_clean_bin.29.strict_cleaned	d__Bacteria	p__Bacillota_A	c__Clostridia	o__Oscillospirales	f__Oscillospiraceae	g__ER4	s__ER4 sp900317525	47660_4#141	31,175	83	96.54	0.17	chain
40054_3#154_bin.14.orig_clean	d__Bacteria	p__Bacillota	c__Bacilli	o__Lactobacillales	f__Lactobacillaceae	g__Lactobacillus	s__Lactobacillus absiana	40054_3#154	35373	88	99.44	0.76	chain
47542_1#96_clean_bin.2.orig_cleaned	d__Bacteria	p__Bacteroidota	c__Bacteroidia	o__Bacteroidales	f__Bacteroidaceae	g__Prevotella	s__Prevotella sp002251385	47542_1#96	79,339	60	95.73	0.03	chain
40054_4#30_bin.21.orig_clean	d__Bacteria	p__Bacillota_C	c__Negativicutes	o__Selenomonadales	f__Selenomonadaceae	g__Megamonas	s__Megamonas gallistercoris	40054_4#30	38665	102	98.94	0.68	chain
47660_4#64_clean_bin.32.orig_cleaned	d__Bacteria	p__Bacillota_A	c__Clostridia	o__Oscillospirales	f__Oscillospiraceae	g__Vescimonas	s__Vescimonas sp900545495	47660_4#64	86,053	40	97.34	0.36	chain
47660_4#103_clean_bin.9.permissive_cleaned	d__Bacteria	p__Bacillota_A	c__Clostridia	o__Oscillospirales	f__Acutalibacteraceae	g__HGM12814	s__HGM12814 sp900770165	47660_4#103	165,280	27	98.13	0.53	chain
39907_1#31_bin.6.orig_clean	d__Bacteria	p__Bacillota_A	c__Clostridia	o__Lachnospirales	f__Lachnospiraceae	g__Merdimonas	s__Merdimonas faecis	39907_1#31	56519	82	95.48	0	chain
47660_4#41_clean_bin.20.orig_cleaned	d__Bacteria	p__Bacillota_A	c__Clostridia	o__Lachnospirales	f__Lachnospiraceae	g__Coprococcus_A	s__Coprococcus_A catus_A	47660_4#41	66,312	65	99.76	0.86	chain
47680_3#3_clean_bin.7.strict_cleaned	d__Bacteria	p__Bacillota	c__Bacilli	o__Lactobacillales	f__Lactobacillaceae	g__Ligilactobacillus	s__Ligilactobacillus agilis	47680_3#3	88,370	31	99.99	0.91	chain
47660_4#130_clean_bin.12.strict_cleaned	d__Bacteria	p__Actinomycetota	c__Actinomycetia	o__Mycobacteriales	f__Mycobacteriaceae	g__Lawsonella	s__Lawsonella sp018376445	47660_4#130	456,236	8	99.99	0.91	chain
47660_4#141_clean_bin.32.orig_cleaned	d__Bacteria	p__Bacillota_A	c__Clostridia	o__Christensenellales	f__CAG-138	g__Phil1	s__Phil1 sp001940855	47660_4#141	52,565	55	95.94	0.1	chain
39923_4#67_bin.2.permissive_clean	d__Bacteria	p__Actinomycetota	c__Coriobacteriia	o__Coriobacteriales	f__Eggerthellaceae	g__Senegalimassilia	s__Senegalimassilia faecalis	39923_4#67	295431	17	98.55	0.63	chain
40054_2#67_bin.15.permissive_clean	d__Bacteria	p__Bacillota_A	c__Clostridia	o__Lachnospirales	f__Lachnospiraceae	g__Mediterraneibacter	s__Mediterraneibacter excrementipullorum	40054_2#67	131881	31	99.44	0.81	chain
40054_2#69_bin.14.permissive_clean	d__Bacteria	p__Bacillota_A	c__Clostridia	o__Eubacteriales	f__Eubacteriaceae	g__Eubacterium	s__Eubacterium callanderi	40054_2#69	381173	19	100	0.93	chain
39907_2#84_bin.2.orig_clean	d__Bacteria	p__Bacteroidota	c__Bacteroidia	o__Bacteroidales	f__Bacteroidaceae	g__Prevotella	s__Prevotella sp900548745	39907_2#84	45344	112	95.53	0.04	chain
47660_4#15_clean_bin.12.orig_cleaned	d__Bacteria	p__Bacillota	c__Bacilli	o__Erysipelotrichales	f__Coprobacillaceae	g__Faecalibacillus	s__Faecalibacillus faecis	47660_4#15	77,630	50	98.44	0.63	chain
39907_1#62_bin.43.orig_clean	d__Bacteria	p__Bacillota_A	c__Clostridia	o__Christensenellales	f__CAG-917	g__CAG-475	s__CAG-475 sp000434435	39907_1#62	204659	27	95.91	0.13	chain
39923_4#166_bin.1.orig_clean	d__Bacteria	p__Pseudomonadota	c__Gammaproteobacteria	o__Burkholderiales	f__Burkholderiaceae_A	g__Sutterella	s__Sutterella sp934255515	39923_4#166	27089	163	97.91	0.53	chain
39907_1#5_bin.22.strict_clean	d__Bacteria	p__Bacillota_A	c__Clostridia	o__Oscillospirales	f__Oscillospiraceae	g__Faecousia	s__Faecousia sp003525905	39907_1#5	45723	77	95.22	0	chain
47542_1#37_clean_bin.34.strict_cleaned	d__Bacteria	p__Bacteroidota	c__Bacteroidia	o__Bacteroidales	f__UBA932	g__Cryptobacteroides	s__Cryptobacteroides sp000433355	47542_1#37	122,064	48	97.56	0.47	chain
39907_2#115_bin.11.permissive_clean	d__Bacteria	p__Bacillota_A	c__Clostridia	o__Lachnospirales	f__Lachnospiraceae	g__Lachnoclostridium_B	s__Lachnoclostridium_B monacensis	39907_2#115	142114	47	99.28	0.83	chain
47660_4#141_clean_bin.22.permissive_cleaned	d__Bacteria	p__Bacillota_A	c__Clostridia	o__Oscillospirales	f__CAG-272	g__CAG-724	s__CAG-724 sp905202255	47660_4#141	128,246	49	97.81	0.54	chain
40054_4#30_bin.15.strict_clean	d__Bacteria	p__Bacillota_A	c__Clostridia	o__Oscillospirales	f__Oscillospiraceae	g__Flavonifractor	s__Flavonifractor plautii	40054_4#30	50860	102	99.46	0.88	chain
40054_2#58_bin.32.orig_clean	d__Bacteria	p__Bacillota_A	c__Clostridia	o__TANB77	f__CAG-508	g__CAG-269	s__CAG-269 sp900552555	40054_2#58	140797	30	97.85	0.56	chain
47660_4#100_clean_bin.23.permissive_cleaned	d__Bacteria	p__Bacillota	c__Bacilli	o__Lactobacillales	f__Lactobacillaceae	g__Leuconostoc	s__Leuconostoc sp900554745	47660_4#100	33,127	83	99.5	0.89	chain
39923_2#168_bin.15.orig_clean	d__Bacteria	p__Bacillota_A	c__Clostridia	o__Oscillospirales	f__Oscillospiraceae	g__Vescimonas	s__Vescimonas sp001916855	39923_2#168	185955	24	97.09	0.41	chain
47660_4#167_clean_bin.23.orig_cleaned	d__Bacteria	p__Bacillota_A	c__Clostridia	o__Lachnospirales	f__Lachnospiraceae	g__Coprococcus	s__Coprococcus eutactus_A	47660_4#167	148,683	29	99.4	0.88	chain
47660_4#88_clean_bin.5.strict_cleaned	d__Bacteria	p__Pseudomonadota	c__Gammaproteobacteria	o__Pseudomonadales	f__Moraxellaceae	g__Acinetobacter	s__Acinetobacter baumannii	47660_4#88	43,350	168	96.78	0.36	chain
39907_4#9_bin.7.orig_clean	d__Bacteria	p__Bacillota_A	c__Clostridia	o__Clostridiales	f__Clostridiaceae	g__Clostridium	s__Clostridium butyricum	39907_4#9	181709	47	100	1.01	chain
39923_2#151_bin.22.permissive_clean	d__Bacteria	p__Campylobacterota	c__Campylobacteria	o__Campylobacterales	f__Campylobacteraceae	g__Campylobacter_D	s__Campylobacter_D sp934718785	39923_2#151	149149	31	99.99	1.02	chain
40054_4#13_bin.4.strict_clean	d__Bacteria	p__Pseudomonadota	c__Gammaproteobacteria	o__Burkholderiales	f__Burkholderiaceae_A	g__Sutterella	s__Sutterella faecalis	40054_4#13	32383	143	97.41	0.51	chain
40054_2#180_bin.28.strict_clean	d__Bacteria	p__Campylobacterota	c__Campylobacteria	o__Campylobacterales	f__Helicobacteraceae	g__Helicobacter_C	s__Helicobacter_C japonicus	40054_2#180	46872	84	99.9	1.01	chain
47660_4#141_clean_bin.5.strict_cleaned	d__Bacteria	p__Bacillota_A	c__Clostridia	o__Christensenellales	f__CAG-314	g__Fimimonas	s__Fimimonas sp003537755	47660_4#141	73,878	53	96	0.23	chain
40054_2#169_bin.11.strict_clean	d__Bacteria	p__Bacillota_A	c__Clostridia	o__Oscillospirales	f__Acutalibacteraceae	g__Ruminococcus_E	s__Ruminococcus_E sp003438075	40054_2#169	91253	43	99.55	0.94	chain
38353_8#21_bin.19.orig_clean	d__Bacteria	p__Bacteroidota	c__Bacteroidia	o__Bacteroidales	f__Bacteroidaceae	g__Alloprevotella	s__Alloprevotella sp900542795	38353_8#21	31382	138	97.09	0.45	chain
39907_1#58_bin.20.orig_clean	d__Bacteria	p__Bacteroidota	c__Bacteroidia	o__Bacteroidales	f__Bacteroidaceae	g__Bacteroides	s__Bacteroides stercoris	39907_1#58	93865	57	95.54	0.14	chain
39907_1#5_bin.12.orig_clean	d__Bacteria	p__Bacillota	c__Bacilli	o__RFN20	f__CAG-288	g__CAG-345	s__CAG-345 sp000433315	39907_1#5	248551	20	96.24	0.29	chain
47542_1#161_clean_bin.9.strict_cleaned	d__Bacteria	p__Bacillota_C	c__Negativicutes	o__Acidaminococcales	f__Acidaminococcaceae	g__URXU01	s__URXU01 sp900545025	47542_1#161	30,466	97	99.23	0.89	chain
38222_6#12_bin.21.strict_clean	d__Bacteria	p__Bacillota_A	c__Clostridia	o__Oscillospirales	f__Ruminococcaceae	g__Faecalibacterium	s__Faecalibacterium sp934524985	38222_6#12	76261	59	95.28	0.11	chain
40054_2#62_bin.32.orig_clean	d__Bacteria	p__Bacillota_A	c__Clostridia	o__Lachnospirales	f__Lachnospiraceae	g__COE1	s__COE1 sp001916965	40054_2#62	130379	52	100	1.07	chain
47660_4#130_clean_bin.4.permissive_cleaned	d__Bacteria	p__Actinomycetota	c__Actinomycetia	o__Actinomycetales	f__Actinomycetaceae	g__Pauljensenia	s__Pauljensenia radingae_A	47660_4#130	193,668	17	99.58	0.99	chain
47542_1#190_clean_bin.18.strict_cleaned	d__Bacteria	p__Bacillota	c__Bacilli	o__Erysipelotrichales	f__Coprobacillaceae	g__Massilimicrobiota	s__Massilimicrobiota merdigallinarum	47542_1#190	46,697	69	96.34	0.35	chain
47542_1#130_clean_bin.40.strict_cleaned	d__Bacteria	p__Actinomycetota	c__Coriobacteriia	o__Coriobacteriales	f__Coriobacteriaceae	g__Collinsella	s__Collinsella sp934655835	47542_1#130	222,603	20	99.89	1.06	chain
47680_3#20_clean_bin.15.permissive_cleaned	d__Bacteria	p__Bacillota	c__Bacilli	o__Erysipelotrichales	f__Erysipelotrichaceae	g__Holdemanella	s__Holdemanella sp900556915	47680_3#20	43,686	86	98.3	0.75	chain
40054_3#173_bin.10.strict_clean	d__Bacteria	p__Bacillota	c__Bacilli	o__Lactobacillales	f__Enterococcaceae	g__Enterococcus_A	s__Enterococcus_A avium	40054_3#173	79944	100	99.48	0.99	chain
47680_3#32_clean_bin.4.permissive_cleaned	d__Bacteria	p__Bacillota_A	c__Clostridia	o__Peptostreptococcales	f__Anaerovoracaceae	g__Lentihominibacter	s__Lentihominibacter faecis	47680_3#32	65,134	56	95.88	0.27	chain
47542_1#52_clean_bin.2.orig_cleaned	d__Bacteria	p__Bacillota	c__Bacilli	o__Lactobacillales	f__Enterococcaceae	g__Enterococcus_A	s__Enterococcus_A raffinosus	47542_1#52	44,037	133	100	1.11	chain
47660_4#149_clean_bin.18.strict_cleaned	d__Bacteria	p__Bacillota_A	c__Clostridia	o__Lachnospirales	f__Lachnospiraceae	g__Clostridium_Q	s__Clostridium_Q fessum	47660_4#149	220,838	25	97.06	0.53	chain
40054_2#180_bin.39.strict_clean	d__Bacteria	p__Bacillota_A	c__Clostridia	o__Oscillospirales	f__Oscillospiraceae	g__Vescimonas	s__Vescimonas sp003539495	40054_2#180	119511	32	96.25	0.37	chain
39907_1#1_bin.3.strict_clean	d__Bacteria	p__Bacillota_A	c__Clostridia	o__Oscillospirales	f__Oscillospiraceae	g__CAG-103	s__CAG-103 sp900757655	39907_1#1	231076	22	96.39	0.4	chain
47542_1#102_clean_bin.42.orig_cleaned	d__Bacteria	p__Bacillota_A	c__Clostridia	o__Lachnospirales	f__Lachnospiraceae	g__Agathobacter	s__Agathobacter sp900317585	47542_1#102	76,963	70	95.24	0.17	chain
47660_4#125_clean_bin.18.permissive_cleaned	d__Bacteria	p__Bacillota_A	c__Clostridia	o__Lachnospirales	f__Lachnospiraceae	g__Lachnospira	s__Lachnospira sp000437735	47660_4#125	199,517	25	99.99	1.13	chain
47660_4#169_clean_bin.19.permissive_cleaned	d__Bacteria	p__Bacillota_A	c__Clostridia	o__Christensenellales	f__Borkfalkiaceae	g__UBA10281	s__UBA10281 sp900767885	47660_4#169	114,414	33	95.45	0.23	chain
40054_2#64_bin.16.orig_clean	d__Bacteria	p__Bacillota_A	c__Clostridia	o__Oscillospirales	f__Oscillospiraceae	g__CAG-103	s__CAG-103 sp900543625	40054_2#64	37360	87	96.73	0.49	chain
40054_4#34_bin.1.orig_clean	d__Bacteria	p__Bacillota_C	c__Negativicutes	o__Acidaminococcales	f__Acidaminococcaceae	g__Acidaminococcus	s__Acidaminococcus massiliensis	40054_4#34	52700	90	99.98	1.15	chain
47542_1#130_clean_bin.38.orig_cleaned	d__Bacteria	p__Bacillota_A	c__Clostridia	o__Lachnospirales	f__Lachnospiraceae	g__Coprococcus_A	s__Coprococcus_A catus	47542_1#130	154,998	44	99.88	1.13	chain
47542_1#115_clean_bin.20.orig_cleaned	d__Bacteria	p__Bacillota_C	c__Negativicutes	o__Selenomonadales	f__Selenomonadaceae	g__Selenomonas_A	s__Selenomonas_A sp900769615	47542_1#115	56,557	69	94.37	0.06	chain
47542_1#111_clean_bin.55.orig_cleaned	d__Bacteria	p__Bacteroidota	c__Bacteroidia	o__Bacteroidales	f__Bacteroidaceae	g__Prevotella	s__Prevotella sp000436915	47542_1#111	39,698	103	94.09	0.01	chain
47660_4#40_clean_bin.16.strict_cleaned	d__Bacteria	p__Pseudomonadota	c__Gammaproteobacteria	o__Enterobacterales	f__Enterobacteriaceae	g__Salmonella	s__Salmonella enterica	47660_4#40	117,753	63	94.62	0.12	chain
40054_2#67_bin.10.strict_clean	d__Bacteria	p__Bacillota_A	c__Clostridia	o__Oscillospirales	f__Ruminococcaceae	g__Negativibacillus	s__Negativibacillus massiliensis	40054_2#67	92462	62	97.3	0.69	chain
47542_1#96_clean_bin.51.orig_cleaned	d__Bacteria	p__Bacillota_A	c__Clostridia	o__Christensenellales	f__Borkfalkiaceae	g__UBA10281	s__UBA10281 sp000437515	47542_1#96	71,102	39	94.66	0.17	chain
47680_3#3_clean_bin.2.orig_cleaned	d__Bacteria	p__Bacillota	c__Bacilli	o__Lactobacillales	f__Lactobacillaceae	g__Limosilactobacillus	s__Limosilactobacillus ingluviei	47680_3#3	124,953	26	99.96	1.23	chain
47660_4#105_clean_bin.21.orig_cleaned	d__Bacteria	p__Bacillota_A	c__Clostridia	o__Lachnospirales	f__Lachnospiraceae	g__RUG115	s__RUG115 sp900066395	47660_4#105	146,551	31	99.95	1.23	chain
47660_4#164_clean_bin.13.orig_cleaned	d__Bacteria	p__Bacillota_A	c__Clostridia	o__Clostridiales	f__Clostridiaceae	g__Clostridium	s__Clostridium sp900539375	47660_4#164	60,520	79	98.42	0.93	chain
47660_4#15_clean_bin.9.orig_cleaned	d__Bacteria	p__Bacillota_A	c__Clostridia	o__Lachnospirales	f__Lachnospiraceae	g__Butyribacter	s__Butyribacter intestini	47660_4#15	73,157	73	98.87	1.02	chain
47542_1#189_clean_bin.16.orig_cleaned	d__Bacteria	p__Actinomycetota	c__Coriobacteriia	o__Coriobacteriales	f__Eggerthellaceae	g__Adlercreutzia	s__Adlercreutzia equolifaciens	47542_1#189	169,683	43	98.81	1.01	chain
39923_4#52_bin.11.strict_clean	d__Bacteria	p__Bacillota_A	c__Clostridia	o__Clostridiales	f__Clostridiaceae	g__Clostridium	s__Clostridium cuniculi	39923_4#52	41812	135	98.9	1.04	chain
47660_4#147_clean_bin.12.strict_cleaned	d__Bacteria	p__Bacteroidota	c__Bacteroidia	o__Bacteroidales	f__Bacteroidaceae	g__Phocaeicola	s__Phocaeicola plebeius	47660_4#147	79,104	84	93.68	0	chain
47660_4#6_clean_bin.20.strict_cleaned	d__Bacteria	p__Bacillota_A	c__Clostridia	o__Lachnospirales	f__Lachnospiraceae	g__Schaedlerella	s__Schaedlerella sp900066545	47660_4#6	41,106	147	95.01	0.27	chain
40054_3#171_bin.7.orig_clean	d__Bacteria	p__Actinomycetota	c__Coriobacteriia	o__Coriobacteriales	f__Coriobacteriaceae	g__Collinsella	s__Collinsella sp900550965	40054_3#171	106298	37	99.89	1.25	chain
39907_1#5_bin.32.orig_clean	d__Bacteria	p__Verrucomicrobiota	c__Lentisphaeria	o__Victivallales	f__UBA1829	g__UBA1829	s__UBA1829 sp002338895	39907_1#5	67810	138	99.09	1.1	chain
47680_3#28_clean_bin.2.permissive_cleaned	d__Bacteria	p__Bacillota_A	c__Clostridia	o__Lachnospirales	f__Lachnospiraceae	g__Anaerostipes	s__Anaerostipes rhamnosivorans	47680_3#28	510,925	27	99.97	1.28	chain
47660_4#13_clean_bin.20.strict_cleaned	d__Bacteria	p__Bacillota_A	c__Clostridia	o__Oscillospirales	f__Ruminococcaceae	g__Ruminococcus_C	s__Ruminococcus_C sp000433635	47660_4#13	14,294	234	96.44	0.58	chain
40054_3#160_bin.35.orig_clean	d__Bacteria	p__Bacillota_A	c__Clostridia	o__Oscillospirales	f__Oscillospiraceae	g__Vescimonas	s__Vescimonas sp003487665	40054_3#160	22822	123	100	1.3	chain
39907_1#1_bin.1.strict_clean	d__Bacteria	p__Bacillota_A	c__Clostridia	o__Christensenellales	f__QALW01	g__UMGS1338	s__UMGS1338 sp900550805	39907_1#1	69414	42	94.94	0.29	chain
39907_1#62_bin.39.permissive_clean	d__Bacteria	p__Spirochaetota	c__Spirochaetia	o__Treponematales	f__Treponemataceae	g__Treponema_D	s__Treponema_D peruense	39907_1#62	236200	19	99.94	1.31	chain
39907_1#56_bin.12.orig_clean	d__Bacteria	p__Bacillota_A	c__Clostridia	o__Oscillospirales	f__Oscillospiraceae	g__Vescimonas	s__Vescimonas fastidiosa	39907_1#56	19910	155	97.02	0.73	chain
47660_4#77_clean_bin.34.strict_cleaned	d__Bacteria	p__Actinomycetota	c__Actinomycetia	o__Actinomycetales	f__Bifidobacteriaceae	g__Bifidobacterium	s__Bifidobacterium angulatum	47660_4#77	97,245	43	98.91	1.12	chain
47660_4#103_clean_bin.12.orig_cleaned	d__Bacteria	p__Bacillota_A	c__Clostridia	o__Oscillospirales	f__Oscillospiraceae	g__CAG-103	s__CAG-103 sp000432375	47660_4#103	129,801	24	94.69	0.28	chain
47542_1#187_clean_bin.24.orig_cleaned	d__Bacteria	p__Bacillota_A	c__Clostridia	o__Lachnospirales	f__Lachnospiraceae	g__Anaerobutyricum	s__Anaerobutyricum hallii	47542_1#187	40,612	109	99.51	1.26	chain
47660_4#166_clean_bin.2.strict_cleaned	d__Bacteria	p__Bacillota_A	c__Clostridia	o__Oscillospirales	f__Ruminococcaceae	g__Faecalibacterium	s__Faecalibacterium duncaniae	47660_4#166	41,956	96	93.71	0.1	chain
39907_4#155_bin.1.strict_clean	d__Bacteria	p__Bacillota_A	c__Clostridia	o__Oscillospirales	f__CAG-272	g__CAG-448	s__CAG-448 sp003150135	39907_4#155	29995	146	93.64	0.09	chain
47660_4#141_clean_bin.12.orig_cleaned	d__Bacteria	p__Bacteroidota	c__Bacteroidia	o__Bacteroidales	f__Rikenellaceae	g__Alistipes_A	s__Alistipes_A pullistercoris	47660_4#141	113,613	41	94.22	0.22	chain
39923_2#170_bin.2.strict_clean	d__Bacteria	p__Actinomycetota	c__Coriobacteriia	o__Coriobacteriales	f__Atopobiaceae	g__Parolsenella	s__Parolsenella uli_A	39923_2#170	202645	25	94.76	0.33	chain
47542_1#42_clean_bin.3.orig_cleaned	d__Bacteria	p__Pseudomonadota	c__Gammaproteobacteria	o__Enterobacterales_A	f__Pasteurellaceae	g__Haemophilus_A	s__Haemophilus_A parahaemolyticus	47542_1#42	27,435	143	94.34	0.25	chain
40054_3#152_bin.15.permissive_clean	d__Bacteria	p__Actinomycetota	c__Coriobacteriia	o__Coriobacteriales	f__Atopobiaceae	g__Parolsenella	s__Parolsenella sp900544655	40054_3#152	79358	37	95.07	0.4	chain
47660_4#141_clean_bin.21.permissive_cleaned	d__Bacteria	p__Elusimicrobiota	c__Elusimicrobia	o__Elusimicrobiales	f__Elusimicrobiaceae	g__UBA1436	s__UBA1436 sp900540405	47660_4#141	133,407	20	98.68	1.13	chain
38353_1#1_bin.1.strict_clean	d__Bacteria	p__Actinomycetota	c__Coriobacteriia	o__Coriobacteriales	f__Atopobiaceae	g__Parolsenella	s__Parolsenella sp900549525	38353_1#1	514669	10	94.48	0.33	chain
47660_4#83_clean_bin.1.orig_cleaned	d__Bacteria	p__Bacillota	c__Bacilli	o__Lactobacillales	f__Streptococcaceae	g__Streptococcus	s__Streptococcus mutans	47660_4#83	26,494	98	96.86	0.82	chain
47660_4#39_clean_bin.18.orig_cleaned	d__Bacteria	p__Bacillota_A	c__Clostridia	o__Lachnospirales	f__Lachnospiraceae	g__Roseburia_A	s__Roseburia_A sp934359535	47660_4#39	96,781	54	92.72	0	chain
47542_1#186_clean_bin.14.orig_cleaned	d__Bacteria	p__Bacillota_A	c__Clostridia	o__Peptostreptococcales	f__Anaerovoracaceae	g__VUNA01	s__VUNA01 sp002299625	47542_1#186	76,559	41	93.56	0.19	chain
39907_1#62_bin.8.orig_clean	d__Bacteria	p__Bacillota_A	c__Clostridia	o__Christensenellales	f__Borkfalkiaceae	g__UBA10281	s__UBA10281 sp900556195	39907_1#62	123339	34	95.21	0.52	chain
47660_4#103_clean_bin.5.permissive_cleaned	d__Bacteria	p__Bacillota	c__Bacilli	o__RF39	f__UBA660	g__CAG-302	s__CAG-302 sp900543825	47660_4#103	711,091	6	92.95	0.07	chain
39907_1#5_bin.9.orig_clean	d__Bacteria	p__Bacteroidota	c__Bacteroidia	o__Bacteroidales	f__Bacteroidaceae	g__Bacteroides	s__Bacteroides nordii	39907_1#5	47310	177	94.82	0.47	chain
40054_2#71_bin.20.permissive_clean	d__Bacteria	p__Pseudomonadota	c__Gammaproteobacteria	o__Burkholderiales	f__Burkholderiaceae_A	g__Parasutterella	s__Parasutterella excrementihominis	40054_2#71	82007	72	99.97	1.5	chain
39907_4#155_bin.21.permissive_clean	d__Bacteria	p__Bacteroidota	c__Bacteroidia	o__Bacteroidales	f__UBA932	g__Cryptobacteroides	s__Cryptobacteroides sp900544195	39907_4#155	120333	68	96.63	0.84	chain
39907_1#62_bin.60.strict_clean	d__Bacteria	p__Bacillota	c__Bacilli	o__RF39	f__UBA660	g__CAG-710	s__CAG-710 sp000432595	39907_1#62	102027	20	93.07	0.13	chain
47660_4#33_clean_bin.4.permissive_cleaned	d__Bacteria	p__Bacillota	c__Bacilli	o__Lactobacillales	f__Lactobacillaceae	g__Lactobacillus	s__Lactobacillus delbrueckii_B	47660_4#33	104,152	31	99.99	1.53	chain
39907_1#75_bin.1.permissive_clean	d__Bacteria	p__Bacillota_A	c__Clostridia	o__Lachnospirales	f__CAG-274	g__Tyzzerella	s__Tyzzerella sp018371275	39907_1#75	12750	232	95.88	0.71	chain
39923_4#158_bin.7.strict_clean	d__Bacteria	p__Bacillota	c__Bacilli	o__Lactobacillales	f__Lactobacillaceae	g__Limosilactobacillus	s__Limosilactobacillus antri	39923_4#158	36060	77	94.42	0.42	chain
39907_1#23_bin.22.permissive_clean	d__Bacteria	p__Pseudomonadota	c__Gammaproteobacteria	o__Burkholderiales	f__Burkholderiaceae_A	g__Sutterella	s__Sutterella wadsworthensis	39907_1#23	81798	73	97.2	0.98	chain
47660_4#82_clean_bin.16.permissive_cleaned	d__Bacteria	p__Pseudomonadota	c__Gammaproteobacteria	o__Enterobacterales_A	f__Succinivibrionaceae	g__Anaerobiospirillum	s__Anaerobiospirillum succiniciproducens	47660_4#82	30,113	222	93.66	0.28	chain
39907_4#155_bin.18.permissive_clean	d__Bacteria	p__Bacillota_A	c__Clostridia	o__Christensenellales	f__Borkfalkiaceae	g__UBA7597	s__UBA7597 sp900542935	39907_4#155	50883	79	92.89	0.13	chain
47542_1#157_clean_bin.4.strict_cleaned	d__Bacteria	p__Bacillota	c__Bacilli	o__Lactobacillales	f__Streptococcaceae	g__Streptococcus	s__Streptococcus alactolyticus	47542_1#157	54,518	43	92.27	0.02	chain
39923_1#3_bin.32.orig_clean	d__Bacteria	p__Bacillota_A	c__Clostridia	o__Lachnospirales	f__Lachnospiraceae	g__CAG-303	s__CAG-303 sp000437755	39923_1#3	65920	59	95.11	0.59	chain
39907_1#64_bin.22.permissive_clean	d__Bacteria	p__Pseudomonadota	c__Gammaproteobacteria	o__Burkholderiales	f__Burkholderiaceae_A	g__Mesosutterella	s__Mesosutterella massiliensis	39907_1#64	174303	21	99.37	1.47	chain
47660_4#73_clean_bin.19.strict_cleaned	d__Bacteria	p__Bacillota_A	c__Clostridia	o__Oscillospirales	f__Butyricicoccaceae	g__Butyricicoccus_A	s__Butyricicoccus_A intestinisimiae	47660_4#73	358,030	17	100	1.6	chain
47660_4#83_clean_bin.6.strict_cleaned	d__Bacteria	p__Bacillota	c__Bacilli	o__Lactobacillales	f__Lactobacillaceae	g__Lactobacillus	s__Lactobacillus delbrueckii	47660_4#83	102,663	44	93.81	0.38	chain
40054_4#7_bin.20.orig_clean	d__Bacteria	p__Bacillota_A	c__Clostridia	o__Eubacteriales	f__Eubacteriaceae	g__Eubacterium	s__Eubacterium limosum	40054_4#7	308726	23	100	1.62	chain
39923_1#184_bin.6.permissive_clean	d__Bacteria	p__Bacteroidota	c__Bacteroidia	o__Bacteroidales	f__Tannerellaceae	g__Parabacteroides	s__Parabacteroides gordonii	39923_1#184	64180	194	97.04	1.05	chain
40054_4#59_bin.21.orig_clean	d__Bacteria	p__Pseudomonadota	c__Gammaproteobacteria	o__Burkholderiales	f__Burkholderiaceae_A	g__Mesosutterella	s__Mesosutterella multiformis	40054_4#59	150518	26	99.91	1.63	chain
47660_4#119_clean_bin.22.orig_cleaned	d__Bacteria	p__Bacillota_A	c__Clostridia	o__Lachnospirales	f__Lachnospiraceae	g__Wujia	s__Wujia chipingensis	47660_4#119	132,501	30	99.87	1.66	chain
47660_4#82_clean_bin.3.strict_cleaned	d__Bacteria	p__Bacteroidota	c__Bacteroidia	o__Bacteroidales	f__Bacteroidaceae	g__Alloprevotella	s__Alloprevotella sp900541575	47660_4#82	78,098	68	91.77	0.04	chain
47660_4#77_clean_bin.3.strict_cleaned	d__Bacteria	p__Bacillota_A	c__Clostridia	o__Oscillospirales	f__Oscillospiraceae	g__Faecousia	s__Faecousia sp900547405	47660_4#77	15,032	262	92.35	0.18	chain
39923_2#166_bin.5.orig_clean	d__Bacteria	p__Bacteroidota	c__Bacteroidia	o__Bacteroidales	f__Rikenellaceae	g__Alistipes_A	s__Alistipes_A sp900545315	39923_2#166	29534	115	92.5	0.21	chain
39907_1#62_bin.26.orig_clean	d__Bacteria	p__Bacteroidota	c__Bacteroidia	o__Bacteroidales	f__Bacteroidaceae	g__Prevotella	s__Prevotella sp002251295	39907_1#62	47217	73	91.42	0	chain
39923_4#61_bin.16.permissive_clean	d__Bacteria	p__Spirochaetota	c__Brachyspirae	o__Brachyspirales	f__Brachyspiraceae	g__Brachyspira	s__Brachyspira aalborgi	39923_4#61	37635	110	93.3	0.39	chain
39923_4#50_bin.12.strict_clean	d__Bacteria	p__Bacillota_A	c__Clostridia	o__TANB77	f__CAG-465	g__CAG-465	s__CAG-465 sp000433755	39923_4#50	51713	41	93.67	0.48	chain
47660_4#53_clean_bin.5.strict_cleaned	d__Bacteria	p__Bacillota_A	c__Clostridia	o__Clostridiales	f__Clostridiaceae	g__Clostridium	s__Clostridium neonatale	47660_4#53	78,651	121	99.84	1.72	chain
47542_1#190_clean_bin.23.permissive_cleaned	d__Bacteria	p__Bacillota_A	c__Clostridia	o__Lachnospirales	f__Anaerotignaceae	g__Anaerotignum	s__Anaerotignum lactatifermentans	47542_1#190	14,870	239	92.47	0.25	chain
39923_2#168_bin.39.orig_clean	d__Bacteria	p__Bacillota_A	c__Clostridia	o__Clostridiales	f__Clostridiaceae	g__Clostridium	s__Clostridium sp000435835	39923_2#168	20899	168	93.57	0.49	chain
39907_1#62_bin.40.strict_clean	d__Bacteria	p__Verrucomicrobiota	c__Lentisphaeria	o__UBA1407	f__UBA1407	g__UBA1724	s__UBA1724 sp900548225	39907_1#62	79120	57	94.45	0.67	chain
39923_2#178_bin.11.orig_clean	d__Bacteria	p__Bacillota	c__Bacilli	o__Lactobacillales	f__Lactobacillaceae	g__Weissella	s__Weissella cibaria	39923_2#178	39382	94	96.12	1.01	chain
38353_3#13_bin.21.strict_clean	d__Bacteria	p__Bacteroidota	c__Bacteroidia	o__Bacteroidales	f__Bacteroidaceae	g__Phocaeicola	s__Phocaeicola coprophilus	38353_3#13	76908	70	91.11	0.01	chain
47542_1#184_clean_bin.30.permissive_cleaned	d__Bacteria	p__Bacillota_C	c__Negativicutes	o__Acidaminococcales	f__Acidaminococcaceae	g__CAG-266	s__CAG-266 sp944390935	47542_1#184	85,837	32	96.86	1.18	chain
47660_4#77_clean_bin.37.orig_cleaned	d__Bacteria	p__Bacillota	c__Bacilli	o__RF39	f__UBA660	g__Scybalousia	s__Scybalousia sp900542735	47660_4#77	145,594	18	93.04	0.43	chain
40054_2#176_bin.16.orig_clean	d__Bacteria	p__Bacillota_A	c__Clostridia	o__Lachnospirales	f__Lachnospiraceae	g__Sellimonas	s__Sellimonas intestinalis	40054_2#176	41807	95	92.22	0.27	chain
40054_2#159_bin.11.orig_clean	d__Bacteria	p__Bacillota_A	c__Clostridia	o__Peptostreptococcales	f__Peptostreptococcaceae	g__Clostridioides_A	s__Clostridioides_A sp002390935	40054_2#159	37476	135	93.59	0.55	chain
47660_4#96_clean_bin.32.orig_cleaned	d__Bacteria	p__Bacillota_A	c__Clostridia	o__Oscillospirales	f__Oscillospiraceae	g__CAG-103	s__CAG-103 sp900317855	47660_4#96	115,791	33	96.46	1.13	chain
47542_1#180_clean_bin.35.orig_cleaned	d__Bacteria	p__Bacillota_A	c__Clostridia	o__Clostridiales	f__Clostridiaceae	g__Sarcina	s__Sarcina ventriculi	47542_1#180	49,531	61	93.85	0.61	chain
47660_4#144_clean_bin.21.orig_cleaned	d__Bacteria	p__Bacillota_A	c__Clostridia	o__Oscillospirales	f__Ruminococcaceae	g__Anaerotruncus	s__Anaerotruncus colihominis	47660_4#144	11,273	314	93.36	0.52	chain
47660_4#157_clean_bin.14.permissive_cleaned	d__Bacteria	p__Bacteroidota	c__Bacteroidia	o__Bacteroidales	f__Bacteroidaceae	g__Prevotella	s__Prevotella sp945863825	47660_4#157	102,254	74	93.25	0.51	chain
47542_1#29_clean_bin.12.strict_cleaned	d__Bacteria	p__Bacillota	c__Bacilli	o__RF39	f__UBA660	g__Ventrenecus	s__Ventrenecus sp905205665	47542_1#29	86,138	31	92.43	0.36	chain
39923_4#54_bin.24.strict_clean	d__Bacteria	p__Bacillota_A	c__Clostridia	o__Oscillospirales	f__Oscillospiraceae	g__Vescimonas	s__Vescimonas sp000435555	39923_4#54	82442	43	90.84	0.05	chain
39907_1#62_bin.19.orig_clean	d__Bacteria	p__Bacteroidota	c__Bacteroidia	o__Bacteroidales	f__Bacteroidaceae	g__Prevotella	s__Prevotella sp900548195	39907_1#62	42372	106	90.98	0.09	chain
39907_1#62_bin.48.orig_clean	d__Bacteria	p__Bacillota_A	c__Clostridia	o__Oscillospirales	f__CAG-272	g__CAG-841	s__CAG-841 sp000437375	39907_1#62	63808	43	96.16	1.13	chain
40054_3#148_bin.1.orig_clean	d__Bacteria	p__Bacillota	c__Bacilli	o__Lactobacillales	f__Lactobacillaceae	g__Lactobacillus	s__Lactobacillus amylovorus	40054_3#148	50885	58	91.1	0.12	chain
47542_1#190_clean_bin.12.permissive_cleaned	d__Bacteria	p__Bacillota	c__Bacilli	o__Erysipelotrichales	f__Erysipelotrichaceae	g__Clostridium_AQ	s__Clostridium_AQ innocuum	47542_1#190	71,816	83	99.98	1.9	chain
39907_1#37_bin.13.permissive_clean	d__Bacteria	p__Bacteroidota	c__Bacteroidia	o__Bacteroidales	f__Bacteroidaceae	g__Prevotella	s__Prevotella sp900553155	39907_1#37	75140	82	91.39	0.24	chain
39907_1#62_bin.49.strict_clean	d__Bacteria	p__Bacteroidota	c__Bacteroidia	o__Bacteroidales	f__UBA932	g__Cryptobacteroides	s__Cryptobacteroides sp000432515	39907_1#62	72974	67	96.05	1.18	chain
47660_4#119_clean_bin.32.orig_cleaned	d__Bacteria	p__Bacillota_A	c__Clostridia	o__Oscillospirales	f__Ruminococcaceae	g__Ruminococcus_C	s__Ruminococcus_C sp000437255	47660_4#119	219,284	16	99.55	1.9	chain
47542_1#111_clean_bin.26.strict_cleaned	d__Bacteria	p__Bacillota_A	c__Clostridia	o__Oscillospirales	f__Oscillospiraceae	g__Vescimonas	s__Vescimonas sp900554275	47542_1#111	37,752	98	90.3	0.06	chain
47542_1#96_clean_bin.52.strict_cleaned	d__Archaea	p__Methanobacteriota	c__Methanobacteria	o__Methanobacteriales	f__Methanobacteriaceae	g__Methanobrevibacter_A	s__Methanobrevibacter_A smithii	47542_1#96	127,947	22	91.05	0.23	chain
47542_1#96_clean_bin.39.orig_cleaned	d__Bacteria	p__Bacillota_A	c__Clostridia	o__Oscillospirales	f__Acutalibacteraceae	g__CAG-177	s__CAG-177 sp003538135	47542_1#96	11,478	256	90.42	0.14	chain
47660_4#6_clean_bin.15.strict_cleaned	d__Bacteria	p__Cyanobacteriota	c__Vampirovibrionia	o__Gastranaerophilales	f__Gastranaerophilaceae	g__CAG-196	s__CAG-196 sp900553895	47660_4#6	533,793	12	99.32	1.95	chain
47660_4#70_clean_bin.23.orig_cleaned	d__Bacteria	p__Bacillota	c__Bacilli	o__Lactobacillales	f__Enterococcaceae	g__Enterococcus_B	s__Enterococcus_B lactis	47660_4#70	21,511	205	99.98	2.11	chain
47660_4#64_clean_bin.2.orig_cleaned	d__Bacteria	p__Bacillota_A	c__Clostridia	o__Oscillospirales	f__Ruminococcaceae	g__Ruminococcus_C	s__Ruminococcus_C callidus	47660_4#64	19,219	217	95.24	1.19	chain
39923_4#46_bin.15.strict_clean	d__Bacteria	p__Pseudomonadota	c__Gammaproteobacteria	o__Enterobacterales_A	f__Pasteurellaceae	g__Haemophilus_D	s__Haemophilus_D sp900764435	39923_4#46	22561	121	91.88	0.53	chain
39907_3#75_bin.4.strict_clean	d__Bacteria	p__Bacillota_A	c__Clostridia	o__Lachnospirales	f__Lachnospiraceae	g__Faecalimonas	s__Faecalimonas umbilicata	39907_3#75	62758	68	90.2	0.21	chain
47542_1#138_clean_bin.20.strict_cleaned	d__Bacteria	p__Bacillota_A	c__Clostridia	o__Lachnospirales	f__Lachnospiraceae	g__Butyribacter	s__Butyribacter sp000436755	47542_1#138	94,222	67	91.81	0.55	chain
47660_4#141_clean_bin.1.orig_cleaned	d__Bacteria	p__Desulfobacterota	c__Desulfovibrionia	o__Desulfovibrionales	f__Desulfovibrionaceae	g__Desulfovibrio	s__Desulfovibrio sp900556755	47660_4#141	15,160	253	93.65	0.93	chain
47660_4#11_clean_bin.36.orig_cleaned	d__Bacteria	p__Actinomycetota	c__Actinomycetia	o__Mycobacteriales	f__Mycobacteriaceae	g__Corynebacterium	s__Corynebacterium sp012837295	47660_4#11	15,709	249	95.14	1.25	chain
39907_1#35_bin.1.permissive_clean	d__Bacteria	p__Bacillota	c__Bacilli	o__RFN20	f__CAG-288	g__CAG-568	s__CAG-568 sp000434395	39907_1#35	98844	22	92.15	0.67	chain
47660_4#136_clean_bin.21.strict_cleaned	d__Bacteria	p__Bacillota_A	c__Clostridia	o__Oscillospirales	f__Ruminococcaceae	g__Faecalibacterium	s__Faecalibacterium sp934511465	47660_4#136	67,341	75	94.19	1.12	chain
39907_1#53_bin.18.orig_clean	d__Bacteria	p__Bacillota	c__Bacilli	o__RFN20	f__CAG-826	g__RUG131	s__RUG131 sp900549975	39907_1#53	84404	39	97.63	1.81	chain
40054_2#79_bin.9.permissive_clean	d__Bacteria	p__Bacillota	c__Bacilli	o__RF39	f__UBA660	g__CAG-605	s__CAG-605 sp934098565	40054_2#79	315396	10	92.7	0.83	chain
47660_4#137_clean_bin.23.permissive_cleaned	d__Bacteria	p__Bacillota_A	c__Clostridia	o__Oscillospirales	f__Ruminococcaceae	g__Ruminococcus_D	s__Ruminococcus_D bicirculans	47660_4#137	53,213	88	99.59	2.22	chain
39923_4#50_bin.39.orig_clean	d__Bacteria	p__Bacillota_A	c__Clostridia	o__Oscillospirales	f__Ruminococcaceae	g__Ruminiclostridium_E	s__Ruminiclostridium_E sp934462775	39923_4#50	11109	266	95.05	1.34	chain
39907_1#53_bin.2.permissive_clean	d__Bacteria	p__Bacillota_A	c__Clostridia	o__Oscillospirales	f__Ruminococcaceae	g__Ruminococcus_D	s__Ruminococcus_D sp934435205	39907_1#53	202914	31	99.99	2.33	chain
47542_1#111_clean_bin.56.strict_cleaned	d__Bacteria	p__Bacillota	c__Bacilli	o__Erysipelotrichales	f__Erysipelotrichaceae	g__Holdemanella	s__Holdemanella sp900754615	47542_1#111	65,769	71	91.98	0.79	chain
47660_4#90_clean_bin.3.strict_cleaned	d__Bacteria	p__Bacteroidota	c__Bacteroidia	o__Bacteroidales	f__Bacteroidaceae	g__Prevotella	s__Prevotella copri	47660_4#90	67,723	137	91.38	0.67	chain
47542_1#168_clean_bin.6.permissive_cleaned	d__Bacteria	p__Bacillota	c__Bacilli	o__Erysipelotrichales	f__Erysipelotrichaceae	g__Holdemanella	s__Holdemanella sp934754935	47542_1#168	31,223	119	94.91	1.39	chain
47542_1#111_clean_bin.45.strict_cleaned	d__Bacteria	p__Bacillota	c__Bacilli	o__RF39	f__UBA660	g__CAG-533	s__CAG-533 sp000434495	47542_1#111	50,367	41	90.79	0.57	chain
40054_2#62_bin.4.orig_clean	d__Bacteria	p__Bacillota_A	c__Clostridia	o__TANB77	f__CAG-508	g__CAG-269	s__CAG-269 sp001916065	40054_2#62	126103	29	96.48	1.72	chain
39907_1#5_bin.7.strict_clean	d__Bacteria	p__Bacillota	c__Bacilli	o__Lactobacillales	f__Lactobacillaceae	g__Lactobacillus	s__Lactobacillus gasseri	39907_1#5	40852	71	95.72	1.59	chain
39907_1#62_bin.18.strict_clean	d__Bacteria	p__Fibrobacterota	c__Fibrobacteria	o__Fibrobacterales	f__Fibrobacteraceae	g__Hallerella	s__Hallerella sp934700345	39907_1#62	13489	311	94.5	1.36	chain
47542_1#186_clean_bin.38.orig_cleaned	d__Bacteria	p__Bacteroidota	c__Bacteroidia	o__Bacteroidales	f__UBA932	g__Cryptobacteroides	s__Cryptobacteroides sp000434935	47542_1#186	106,867	49	95.85	1.63	chain
47660_4#64_clean_bin.14.orig_cleaned	d__Bacteria	p__Bacillota_A	c__Clostridia	o__Lachnospirales	f__Lachnospiraceae	g__Butyribacter	s__Butyribacter sp003529475	47660_4#64	28,787	124	94.51	1.37	chain
40054_2#170_bin.17.orig_clean	d__Bacteria	p__Bacillota	c__Bacilli	o__Erysipelotrichales	f__Erysipelotrichaceae	g__Bulleidia	s__Bulleidia sp900539965	40054_2#170	22360	139	95.51	1.58	chain
47542_1#138_clean_bin.31.orig_cleaned	d__Bacteria	p__Bacillota_A	c__Clostridia	o__Clostridiales	f__Clostridiaceae	g__Clostridium	s__Clostridium sp900769625	47542_1#138	85,168	55	98.86	2.27	chain
47660_4#141_clean_bin.48.permissive_cleaned	d__Bacteria	p__Elusimicrobiota	c__Elusimicrobia	o__Elusimicrobiales	f__Elusimicrobiaceae	g__UBA1436	s__UBA1436 sp002329395	47660_4#141	149,536	24	90.76	0.67	chain
47542_1#107_clean_bin.23.orig_cleaned	d__Bacteria	p__Spirochaetota	c__Spirochaetia	o__Treponematales	f__Treponemataceae	g__Treponema_D	s__Treponema_D sp900541945	47542_1#107	77,171	57	99.53	2.44	chain
47542_1#115_clean_bin.11.orig_cleaned	d__Bacteria	p__Bacillota_A	c__Clostridia	o__Lachnospirales	f__Lachnospiraceae	g__Roseburia_A	s__Roseburia_A sp934364805	47542_1#115	101,903	63	92.4	1.04	chain
47680_3#56_clean_bin.2.orig_cleaned	d__Bacteria	p__Bacillota	c__Bacilli	o__Erysipelotrichales	f__Erysipelotrichaceae	g__Holdemanella	s__Holdemanella sp003436425	47680_3#56	35,386	85	95.85	1.73	chain
38353_8#26_bin.28.strict_clean	d__Bacteria	p__Bacillota	c__Bacilli	o__Acholeplasmatales	f__Anaeroplasmataceae	g__CAG-307	s__CAG-307 sp900547045	38353_8#26	221132	18	96.33	1.84	chain
38354_8#20_bin.7.strict_clean	d__Bacteria	p__Bacillota	c__Bacilli	o__Erysipelotrichales	f__Coprobacillaceae	g__Thomasclavelia	s__Thomasclavelia ramosa	38354_8#20	60448	90	98.77	2.34	chain
47660_4#13_clean_bin.13.orig_cleaned	d__Bacteria	p__Bacillota_A	c__Clostridia	o__Lachnospirales	f__Lachnospiraceae	g__Wujia	s__Wujia sp900539705	47660_4#13	141,828	35	98.27	2.27	chain
47660_4#66_clean_bin.8.strict_cleaned	d__Bacteria	p__Actinomycetota	c__Coriobacteriia	o__Coriobacteriales	f__Coriobacteriaceae	g__Collinsella	s__Collinsella sp019041915	47660_4#66	87,634	45	90.46	0.71	chain
39923_3#21_bin.1.strict_clean	d__Bacteria	p__Campylobacterota	c__Campylobacteria	o__Campylobacterales	f__Helicobacteraceae	g__Helicobacter_F	s__Helicobacter_F sp003364115	39923_3#21	15455	160	92.37	1.11	chain
40054_3#179_bin.28.orig_clean	d__Bacteria	p__Bacillota_C	c__Negativicutes	o__Veillonellales	f__Dialisteraceae	g__Allisonella	s__Allisonella histaminiformans	40054_3#179	37260	57	97.11	2.09	chain
47660_4#36_clean_bin.9.orig_cleaned	d__Bacteria	p__Bacillota_A	c__Clostridia	o__TANB77	f__CAG-508	g__CAG-269	s__CAG-269 sp000438255	47660_4#36	18,957	113	95.18	1.71	chain
47660_4#84_clean_bin.27.strict_cleaned	d__Bacteria	p__Bacteroidota	c__Bacteroidia	o__Bacteroidales	f__Bacteroidaceae	g__Alloprevotella	s__Alloprevotella sp900543155	47660_4#84	23,967	191	90.12	0.73	chain
47660_4#80_clean_bin.1.permissive_cleaned	d__Bacteria	p__Desulfobacterota	c__Desulfovibrionia	o__Desulfovibrionales	f__Desulfovibrionaceae	g__Bilophila	s__Bilophila wadsworthia	47660_4#80	11,730	446	94.31	1.57	chain
47542_1#186_clean_bin.39.orig_cleaned	d__Bacteria	p__Bacillota_A	c__Clostridia	o__Lachnospirales	f__Lachnospiraceae	g__Roseburia	s__Roseburia sp003470905	47542_1#186	66,741	81	95	1.75	chain
47660_4#64_clean_bin.38.orig_cleaned	d__Bacteria	p__Bacillota_A	c__Clostridia	o__TANB77	f__CAG-508	g__CAG-269	s__CAG-269 sp934184665	47660_4#64	31,273	53	90.55	0.88	chain
47660_4#173_clean_bin.7.orig_cleaned	d__Bacteria	p__Bacillota_C	c__Negativicutes	o__Veillonellales	f__Dialisteraceae	g__Dialister	s__Dialister sp934193095	47660_4#173	12,408	229	91.81	1.21	chain
47542_1#159_clean_bin.8.strict_cleaned	d__Bacteria	p__Pseudomonadota	c__Gammaproteobacteria	o__Burkholderiales	f__Burkholderiaceae_A	g__Sutterella	s__Sutterella sp900762445	47542_1#159	17,432	184	96.52	2.17	chain
47660_4#164_clean_bin.10.orig_cleaned	d__Bacteria	p__Bacillota_A	c__Clostridia	o__Lachnospirales	f__Lachnospiraceae	g__Lachnospira	s__Lachnospira sp900316325	47660_4#164	108,937	40	95.36	1.94	chain
47542_1#186_clean_bin.27.permissive_cleaned	d__Bacteria	p__Cyanobacteriota	c__Vampirovibrionia	o__Gastranaerophilales	f__Gastranaerophilaceae	g__Stercorousia	s__Stercorousia sp934717855	47542_1#186	28,547	121	92.86	1.45	chain
47542_1#102_clean_bin.20.orig_cleaned	d__Bacteria	p__Bacillota_A	c__Clostridia	o__Oscillospirales	f__Oscillospiraceae	g__Faecousia	s__Faecousia sp900544945	47542_1#102	13,681	204	91.13	1.13	chain
39907_1#62_bin.47.permissive_clean	d__Bacteria	p__Bacteroidota	c__Bacteroidia	o__Bacteroidales	f__UBA932	g__Cryptobacteroides	s__Cryptobacteroides sp900545245	39907_1#62	48003	115	97.91	2.54	chain
40054_2#65_bin.30.strict_clean	d__Bacteria	p__Bacillota_A	c__Clostridia	o__Lachnospirales	f__Lachnospiraceae	g__Blautia_A	s__Blautia_A faecis	40054_2#65	49734	130	92.8	1.54	chain
47680_3#32_clean_bin.30.orig_cleaned	d__Bacteria	p__Bacillota_A	c__Clostridia	o__Oscillospirales	f__Oscillospiraceae	g__Evtepia	s__Evtepia gabavorous	47680_3#32	41,652	94	95.62	2.14	chain
47542_1#102_clean_bin.3.orig_cleaned	d__Bacteria	p__Bacillota_A	c__Clostridia	o__Lachnospirales	f__Lachnospiraceae	g__Agathobacter	s__Agathobacter sp900550545	47542_1#102	69,638	94	92.62	1.58	chain
39907_1#38_bin.7.strict_clean	d__Bacteria	p__Bacillota	c__Bacilli	o__RF39	f__UBA660	g__CAG-605	s__CAG-605 sp000433475	39907_1#38	104928	31	92.17	1.49	chain
47542_1#102_clean_bin.5.strict_cleaned	d__Bacteria	p__Bacillota_A	c__Clostridia	o__Oscillospirales	f__Ruminococcaceae	g__Ruminococcus_C	s__Ruminococcus_C sp000437175	47542_1#102	87,181	71	95.5	2.21	chain
39923_4#50_bin.47.orig_clean	d__Bacteria	p__Bacillota_A	c__Clostridia	o__Lachnospirales	f__Lachnospiraceae	g__1XD42-69	s__1XD42-69 sp014287635	39923_4#50	14402	247	96.91	2.56	chain
47660_4#130_clean_bin.8.strict_cleaned	d__Bacteria	p__Bacillota_A	c__Clostridia	o__Tissierellales	f__Peptoniphilaceae	g__Peptoniphilus_A	s__Peptoniphilus_A gorbachii	47660_4#130	87,386	38	95.23	2.4	chain
47542_1#186_clean_bin.34.strict_cleaned	d__Bacteria	p__Bacillota	c__Bacilli	o__Erysipelotrichales	f__Erysipelotrichaceae	g__Bulleidia	s__Bulleidia sp934754415	47542_1#186	22,671	131	97.27	2.81	chain
47660_4#149_clean_bin.8.orig_cleaned	d__Bacteria	p__Bacillota_A	c__Clostridia	o__Lachnospirales	f__Lachnospiraceae	g__Ventrimonas	s__Ventrimonas sp003478505	47660_4#149	17,544	237	91.18	1.61	chain
39907_1#65_bin.44.permissive_clean	d__Bacteria	p__Desulfobacterota	c__Desulfovibrionia	o__Desulfovibrionales	f__Desulfovibrionaceae	g__Bilophila	s__Bilophila sp902373525	39907_1#65	7629	552	91.22	1.65	chain
47542_1#191_clean_bin.8.orig_cleaned	d__Bacteria	p__Bacillota_A	c__Clostridia	o__Lachnospirales	f__Lachnospiraceae	g__Eubacterium_G	s__Eubacterium_G ventriosum	47542_1#191	22,528	143	91.82	1.79	chain
47660_4#168_clean_bin.9.strict_cleaned	d__Bacteria	p__Pseudomonadota	c__Gammaproteobacteria	o__Burkholderiales	f__Burkholderiaceae_A	g__Sutterella	s__Sutterella seckii_A	47660_4#168	10,300	385	93.75	2.19	chain
47660_4#96_clean_bin.19.permissive_cleaned	d__Bacteria	p__Bacillota_A	c__Clostridia	o__Oscillospirales	f__Ruminococcaceae	g__Gemmiger	s__Gemmiger sp934502625	47660_4#96	24,709	142	92.26	1.94	chain
47542_1#14_clean_bin.5.permissive_cleaned	d__Bacteria	p__Bacteroidota	c__Bacteroidia	o__Bacteroidales	f__Tannerellaceae	g__Parabacteroides	s__Parabacteroides goldsteinii	47542_1#14	107,199	115	93.88	2.28	chain
47660_4#77_clean_bin.18.orig_cleaned	d__Bacteria	p__Bacillota	c__Bacilli	o__RF39	f__UBA660	g__UMGS995	s__UMGS995 sp900769695	47660_4#77	48,177	40	95.9	2.72	chain
38354_8#32_bin.29.orig_clean	d__Bacteria	p__Bacillota	c__Bacilli	o__RF39	f__UBA660	g__Onthousia	s__Onthousia sp934130405	38354_8#32	199434	10	94.44	2.43	chain
47542_1#22_clean_bin.17.orig_cleaned	d__Bacteria	p__Bacillota	c__Bacilli	o__Lactobacillales	f__Enterococcaceae	g__Enterococcus_G	s__Enterococcus_G italicus	47542_1#22	12,485	237	96.26	2.8	chain
47660_4#142_clean_bin.19.orig_cleaned	d__Bacteria	p__Bacillota	c__Bacilli	o__Acholeplasmatales	f__Anaeroplasmataceae	g__CAG-307	s__CAG-307 sp001916215	47660_4#142	68,546	49	97.03	2.97	chain
47660_4#77_clean_bin.44.orig_cleaned	d__Bacteria	p__Bacillota_A	c__Clostridia	o__Oscillospirales	f__Ruminococcaceae	g__Faecalibacterium	s__Faecalibacterium sp003449675	47660_4#77	35,882	179	90.32	1.66	chain
39907_1#43_bin.44.strict_clean	d__Bacteria	p__Cyanobacteriota	c__Vampirovibrionia	o__Gastranaerophilales	f__Gastranaerophilaceae	g__Limenecus	s__Limenecus avicola	39907_1#43	8625	311	93.58	2.43	chain
47660_4#13_clean_bin.28.orig_cleaned	d__Bacteria	p__Bacillota_A	c__Clostridia	o__TANB77	f__CAG-508	g__CAG-245	s__CAG-245 sp000434195	47660_4#13	39,138	50	90.94	1.97	chain
47660_4#43_clean_bin.29.strict_cleaned	d__Bacteria	p__Pseudomonadota	c__Gammaproteobacteria	o__Enterobacterales_A	f__Pasteurellaceae	g__Haemophilus_D	s__Haemophilus_D sp001815355	47660_4#43	12,990	196	90.12	1.81	chain
40054_2#58_bin.35.orig_clean	d__Bacteria	p__Bacillota_A	c__Clostridia	o__Lachnospirales	f__CAG-274	g__CAG-274	s__CAG-274 sp900545305	40054_2#58	44122	83	93.13	2.47	chain
47660_4#77_clean_bin.24.orig_cleaned	d__Bacteria	p__Bacillota	c__Bacilli	o__RF39	f__UBA660	g__CAG-605	s__CAG-605 sp934098505	47660_4#77	40,331	56	90.01	1.91	chain
39923_2#174_bin.13.orig_clean	d__Bacteria	p__Pseudomonadota	c__Gammaproteobacteria	o__Enterobacterales	f__Enterobacteriaceae	g__Klebsiella	s__Klebsiella quasipneumoniae	39923_2#174	40125	337	96.05	3.13	chain
47660_4#64_clean_bin.52.permissive_cleaned	d__Bacteria	p__Bacillota	c__Bacilli	o__RF39	f__UBA660	g__UBA3789	s__UBA3789 sp900543055	47660_4#64	198,295	16	95.02	3.3	chain
39907_1#62_bin.11.orig_clean	d__Bacteria	p__Verrucomicrobiota	c__Kiritimatiellia	o__RFP12	f__UBA1067	g__RUG572	s__RUG572 sp900547945	39907_1#62	43499	163	92.85	2.94	chain
47660_4#84_clean_bin.21.permissive_cleaned	d__Bacteria	p__Pseudomonadota	c__Alphaproteobacteria	o__RF32	f__CAG-239	g__RUG410	s__RUG410 sp934277435	47660_4#84	7,225	247	91.77	2.83	chain
47660_4#55_clean_bin.11.permissive_cleaned	d__Bacteria	p__Bacillota_A	c__Clostridia	o__Lachnospirales	f__Lachnospiraceae	g__Anaerobutyricum	s__Anaerobutyricum sp934307085	47660_4#55	74,141	105	100	4.52	chain
39907_1#60_bin.28.permissive_clean	d__Bacteria	p__Bacillota_A	c__Clostridia	o__TANB77	f__CAG-508	g__CAG-269	s__CAG-269 sp000431335	39907_1#60	12364	148	91.9	3.02	chain
40054_2#180_bin.20.orig_clean	d__Bacteria	p__Pseudomonadota	c__Gammaproteobacteria	o__Burkholderiales	f__Burkholderiaceae_A	g__Duodenibacillus	s__Duodenibacillus sp900544255	40054_2#180	10588	362	92.64	3.72	chain
39907_4#30_bin.36.orig_clean	d__Bacteria	p__Bacillota_A	c__Clostridia	o__Lachnospirales	f__Lachnospiraceae	g__Ventrimonas	s__Ventrimonas sp900770535	39907_4#30	36183	128	90.69	3.33	chain
47542_1#138_clean_bin.29.orig_cleaned	d__Bacteria	p__Bacillota_A	c__Clostridia	o__Clostridiales	f__Clostridiaceae	g__Clostridium	s__Clostridium sp001916075	47542_1#138	35,220	119	93.95	4.06	chain
47660_4#171_clean_bin.13.orig_cleaned	d__Bacteria	p__Bacillota_A	c__Clostridia	o__Lachnospirales	f__Lachnospiraceae	g__Agathobacter	s__Agathobacter sp900552085	47660_4#171	115,778	53	91.55	3.63	chain
39907_2#88_bin.26.permissive_clean	d__Bacteria	p__Bacillota	c__Bacilli	o__Erysipelotrichales	f__Coprobacillaceae	g__Catenibacterium	s__Catenibacterium sp900540685	39907_2#88	7353	351	91.12	3.75	chain
47680_3#18_clean_bin.1.permissive_cleaned	d__Bacteria	p__Bacillota_A	c__Clostridia	o__Lachnospirales	f__Lachnospiraceae	g__Enterocloster	s__Enterocloster clostridioformis	47680_3#18	60,374	119	91.21	4.2	chain
38353_8#26_bin.29.orig_clean	d__Bacteria	p__Bacteroidota	c__Bacteroidia	o__Bacteroidales	f__Bacteroidaceae	g__Bacteroides	s__Bacteroides cellulosilyticus	38353_8#26	64827	187	90.32	4.08	chain
