# Supplementary material for: Ancestral trajectory of infant gut microbiome assembly in non-industrialised populations
Source: Research Square preprint supplement (doi:10.21203/rs.3.rs-6675732/v1), 2025-05-30
Supplement: Supplementary file 15 [file f36364775b121892308cdb65.xlsx]

## Sheet: Sheet1
Diet component	Enzyme commision (EC) number	+ve counterfactual	-ve counterfactual
breast_feeding	2.4.1.25	0.000637026	0.000433341
breast_feeding	2.4.1.1	0.000501225	0.000252953
breast_feeding	2.4.99.15	6.39546e-06	0
breast_feeding	3.2.1.122	8.01526e-06	1.32298e-06
breast_feeding	3.2.1.51	0.00175801	0.000969925
breast_feeding	2.4.1.10	2.72929e-05	9.83385e-06
breast_feeding	3.2.1.14	3.77245e-06	3.37691e-07
breast_feeding	6.3.2.8	0.000375006	0.000181441
breast_feeding	2.4.1.230	2.00961e-05	7.4004e-06
breast_feeding	3.2.1.35	1.28919e-05	2.17377e-06
breast_feeding	3.2.1.170	2.13596e-06	9.29947e-08
breast_feeding	3.2.1.196	0.000439679	0.000222062
breast_feeding	3.2.1.3	7.3845e-06	6.28952e-06
breast_feeding	3.2.1.11	3.2993e-05	1.72064e-05
breast_feeding	2.4.1.227	0.000769723	0.000383682
breast_feeding	3.2.1.4	0.000637926	0.000401811
breast_feeding	3.2.1.24	0.000507964	0.000268554
breast_feeding	3.2.1.52	0.000180428	3.40547e-05
breast_feeding	3.2.1.99	0.000221714	7.62747e-05
breast_feeding	2.4.1.337	2.14583e-05	2.3533e-05
breast_feeding	4.2.2.5	3.37298e-06	3.22833e-06
breast_feeding	3.2.1.135	6.15562e-05	6.47974e-05
breast_feeding	5.4.99.16	0.000149596	6.1049e-05
breast_feeding	3.2.1.133	6.05678e-05	6.31306e-05
breast_feeding	3.2.1.166	1.98569e-05	7.96331e-06
breast_feeding	3.2.1.1	0.000274552	0.000139756
breast_feeding	3.2.1.96	3.6537e-07	0
breast_feeding	2.7.8.12	2.92497e-05	7.30119e-06
breast_feeding	2.4.1.64	2.00961e-05	7.4004e-06
breast_feeding	2.4.99.13	6.39546e-06	0
breast_feeding	2.4.1.83	2.10811e-07	0
breast_feeding	2.4.1.333	2.45492e-05	1.46701e-05
breast_feeding	2.4.1.315	1.36934e-05	4.81067e-07
breast_feeding	3.5.1.28	5.29637e-05	4.62968e-05
breast_feeding	3.2.1.86	0.000242462	0.000185711
breast_feeding	2.4.1.182	2.60548e-05	6.88985e-06
breast_feeding	3.2.1.41	0.00019356	9.98119e-05
breast_feeding	2.4.99.14	6.39546e-06	0
breast_feeding	2.4.1.21	7.75117e-05	4.48972e-05
breast_feeding	2.4.1.18	0.000238648	0.000136913
breast_feeding	2.4.1.129	0.000244363	0.000132306
breast_feeding	2.4.1.332	4.59908e-07	0
breast_feeding	3.5.4.33	1.20103e-06	1.68319e-07
breast_feeding	3.2.1.10	4.12838e-05	3.62254e-05
breast_feeding	2.4.99.16	0.0002671	0.00017273
breast_feeding	3.2.1.55	0.000287692	7.38831e-05
breast_feeding	3.2.1.180	1.36471e-05	4.77558e-06
breast_feeding	3.2.1.26	0.00050905	0.000292265
breast_feeding	2.4.1.5	6.26158e-05	2.56017e-05
breast_feeding	3.2.1.54	6.05678e-05	6.31306e-05
breast_feeding	2.4.1.9	2.72929e-05	9.83385e-06
breast_feeding	3.2.1.68	0.000517984	0.000253866
breast_feeding	2.4.1.288	0.00027954	0.000139587
breast_feeding	3.2.1.78	5.13982e-05	4.59626e-06
breast_feeding	2.4.1.187	5.59419e-05	3.49444e-05
breast_feeding	2.4.1.7	0.000564643	0.000274138
breast_feeding	2.4.1.44	1.80957e-06	0
breast_feeding	3.2.1.177	0.000154116	0.000112012
breast_feeding	5.4.99.15	1.58948e-05	7.41037e-06
breast_feeding	2.4.2.53	8.91455e-06	2.82471e-07
breast_feeding	2.4.1.208	2.17149e-05	2.40547e-05
breast_feeding	2.4.1.20	9.16588e-06	5.07814e-07
breast_feeding	2.4.1.4	0.000146598	5.80018e-05
breast_feeding	3.4.16.4	0.000197495	0.000108318
breast_feeding	3.2.1.20	0.000440645	0.000219896
breast_feeding	2.1.1.72	1.7863e-06	1.37067e-06
breast_feeding	2.4.1.8	3.3116e-05	3.52496e-05
breast_feeding	3.2.1.21	0.00047436	0.000199139
breast_feeding	3.4.17.14	3.6537e-07	0
breast_feeding	3.2.1.93	3.22618e-06	0
breast_feeding	2.4.1.279	4.59908e-07	0
breast_feeding	3.2.1.58	0.000324262	0.000202379
breast_feeding	4.2.2.23	4.75098e-07	0
breast_feeding	3.2.1.18	0.000774759	0.000472542
breast_feeding	3.2.1.45	7.40714e-05	2.22241e-05
breast_feeding	2.1.1.182	1.9879e-07	0
breast_feeding	2.4.99.12	6.39546e-06	0
breast_feeding	3.2.1.156	1.00355e-05	0
breast_feeding	3.2.1.97	1.48635e-05	5.54075e-06
breast_feeding	3.2.1.37	0.000166493	5.55139e-05
breast_feeding	3.2.1.23	0	0
typical_food_fruits	2.4.99.15	6.05643e-10	0
typical_food_fruits	4.2.2.1	4.42969e-10	0
typical_food_fruits	2.4.1.227	1.55435e-07	0
typical_food_fruits	2.4.99.14	6.05643e-10	0
typical_food_fruits	3.2.1.26	1.67583e-07	0
typical_food_fruits	4.2.2.23	3.0777e-10	0
typical_food_fruits	3.2.1.177	1.62955e-08	0
typical_food_fruits	3.2.1.4	1.28283e-09	0
typical_food_fruits	3.2.1.45	9.40819e-08	0
typical_food_fruits	2.4.1.21	0	0
typical_food_fruits	2.4.1.109	1.12841e-09	0
typical_food_fruits	2.4.99.13	6.05643e-10	0
typical_food_fruits	3.2.1.52	1.04207e-07	0
typical_food_fruits	2.4.1.18	5.52948e-07	6.79225e-07
typical_food_fruits	2.4.1.129	9.11802e-08	0
typical_food_fruits	2.4.99.12	6.05643e-10	0
typical_food_fruits	2.4.1.1	9.92707e-08	0
typical_food_sugars_juices	3.2.1.135	1.76151e-07	1.25259e-08
typical_food_sugars_juices	3.2.1.14	1.73825e-07	1.62092e-07
typical_food_sugars_juices	3.2.1.52	2.84593e-07	1.89825e-07
typical_food_sugars_juices	3.2.1.4	3.27251e-08	1.01062e-08
typical_food_milkproducts	2.4.1.291	5.78988e-07	3.04973e-08
typical_food_cerealproducts	2.4.1.25	0.000154169	0.00016134
typical_food_cerealproducts	2.4.99.16	0.000126703	0.00010408
typical_food_cerealproducts	3.2.1.21	2.433e-06	1.25577e-06
typical_food_cerealproducts	6.3.1.20	9.18251e-07	0
typical_food_cerealproducts	3.2.1.1	2.95527e-05	1.78853e-05
typical_food_cerealproducts	3.2.1.26	8.54502e-07	0
typical_food_cerealproducts	3.2.1.58	2.7557e-05	2.67401e-05
typical_food_cerealproducts	2.4.1.348	2.4098e-05	1.72275e-05
typical_food_cerealproducts	2.4.1.83	3.25186e-06	1.6769e-06
typical_food_cerealproducts	3.2.1.68	5.37595e-05	5.16357e-05
typical_food_cerealproducts	2.4.1.347	9.18251e-07	0
typical_food_cerealproducts	3.2.1.78	1.44952e-05	7.65709e-06
typical_food_cerealproducts	3.2.1.18	4.8847e-05	3.67429e-05
typical_food_cerealproducts	3.2.1.86	1.5153e-07	3.98739e-08
typical_food_cerealproducts	3.2.1.41	8.09886e-05	6.77386e-05
typical_food_cerealproducts	2.4.1.227	3.07961e-06	1.50777e-06
typical_food_cerealproducts	3.2.1.97	9.05252e-06	3.04225e-07
typical_food_cerealproducts	3.2.1.4	2.7557e-05	2.67401e-05
typical_food_cerealproducts	2.4.1.15	9.18251e-07	0
typical_food_cerealproducts	2.7.13.3	9.18251e-07	0
typical_food_cerealproducts	2.4.1.21	2.03091e-05	4.09535e-06
typical_food_cerealproducts	3.2.1.24	5.58278e-05	3.3329e-05
typical_food_cerealproducts	3.2.1.37	2.76691e-06	1.26446e-06
typical_food_cerealproducts	3.4.16.4	2.77481e-05	1.60234e-05
typical_food_cerealproducts	2.4.1.18	2.50992e-06	1.20242e-06
typical_food_cerealproducts	3.2.1.20	2.54784e-06	1.12305e-06
typical_food_cerealproducts	2.4.1.129	2.77481e-05	1.60234e-05
typical_food_seafoods	3.2.1.4	1.64328e-09	1.40758e-10
typical_food_seafoods	2.4.1.291	5.67474e-07	6.06929e-08
typical_food_seafoods	2.7.8.12	1.85365e-06	0
typical_food_root_tubers	2.4.1.8	2.13464e-09	0
typical_food_root_tubers	3.2.1.4	3.63653e-08	7.06553e-10
typical_food_root_tubers	2.4.1.11	2.13464e-09	0
typical_food_root_tubers	2.4.1.1	2.13464e-09	0
typical_food_vegetables	2.4.1.25	1.06037e-07	0
typical_food_vegetables	3.2.1.4	2.36397e-06	1.33193e-06
typical_food_vegetables	3.2.1.54	1.06037e-07	0
typical_food_vegetables	3.2.1.135	1.06037e-07	0
typical_food_vegetables	3.2.1.20	1.06037e-07	0
typical_food_vegetables	3.2.1.133	1.06037e-07	0
typical_food_eggs	2.4.1.25	5.21341e-07	3.29471e-09
typical_food_eggs	3.2.1.8	1.31207e-06	0
typical_food_eggs	3.5.1.78	1.31207e-06	0
typical_food_eggs	3.2.1.141	2.20123e-07	0
typical_food_eggs	3.2.1.135	4.84487e-07	0
typical_food_eggs	5.4.99.16	3.4704e-07	0
typical_food_eggs	3.4.17.14	1.31207e-06	0
typical_food_eggs	3.2.1.133	4.84487e-07	0
typical_food_eggs	2.4.1.1	2.5921e-07	0
typical_food_eggs	3.2.1.1	3.4704e-07	0
typical_food_eggs	2.4.99.15	2.80087e-07	2.64476e-09
typical_food_eggs	3.2.1.96	1.31207e-06	0
typical_food_eggs	3.2.1.54	4.84487e-07	0
typical_food_eggs	2.3.1.204	2.99672e-07	0
typical_food_eggs	2.4.99.13	2.80087e-07	2.64476e-09
typical_food_eggs	2.4.1.52	4.83598e-07	2.86696e-08
typical_food_eggs	3.5.1.28	1.31207e-06	0
typical_food_eggs	2.4.1.11	2.5921e-07	0
typical_food_eggs	3.2.1.170	2.99672e-07	0
typical_food_eggs	3.2.1.86	9.15302e-07	2.93344e-07
typical_food_eggs	6.3.1.8	1.31207e-06	0
typical_food_eggs	2.4.99.12	2.80087e-07	2.64476e-09
typical_food_eggs	2.4.1.227	3.78692e-07	4.74893e-08
typical_food_eggs	2.4.99.14	2.80087e-07	2.64476e-09
typical_food_eggs	3.2.1.24	2.99672e-07	0
typical_food_eggs	2.4.1.21	6.35555e-07	0
typical_food_eggs	3.4.16.4	3.27947e-07	8.35716e-09
typical_food_eggs	2.4.1.18	2.20123e-07	0
typical_food_eggs	3.2.1.20	3.4704e-07	0
typical_food_eggs	2.4.1.129	3.27947e-07	8.35716e-09
typical_food_eggs	3.5.4.33	4.84487e-07	0
typical_food_pulses_seeds	3.2.1.52	2.68273e-06	0
typical_food_pulses_seeds	3.2.1.21	4.57849e-07	6.36495e-10
typical_food_pulses_seeds	3.2.1.177	3.08288e-07	4.34192e-08
typical_food_pulses_seeds	2.4.1.18	9.03553e-08	0
food_porridge_pulp_adm	2.4.1.25	6.31702e-05	5.17507e-06
food_porridge_pulp_adm	2.4.1.336	6.44969e-06	1.12574e-06
food_porridge_pulp_adm	4.2.2.1	1.5691e-06	1.46944e-07
food_porridge_pulp_adm	3.2.1.8	1.93731e-05	8.54572e-07
food_porridge_pulp_adm	2.4.1.304	5.45441e-07	3.05461e-07
food_porridge_pulp_adm	2.4.1.291	6.29821e-08	1.95763e-08
food_porridge_pulp_adm	2.4.1.1	4.35014e-05	2.37568e-06
food_porridge_pulp_adm	2.4.99.15	3.63336e-05	3.761e-06
food_porridge_pulp_adm	3.2.1.122	0	1.62521e-06
food_porridge_pulp_adm	3.2.1.51	3.85513e-05	3.95457e-06
food_porridge_pulp_adm	2.4.1.10	2.44849e-06	9.775e-08
food_porridge_pulp_adm	2.4.1.52	8.29487e-06	2.25353e-07
food_porridge_pulp_adm	3.2.1.14	2.66178e-05	8.59197e-07
food_porridge_pulp_adm	3.1.3.16	4.75932e-07	4.19041e-08
food_porridge_pulp_adm	2.4.1.230	1.19168e-05	7.69926e-07
food_porridge_pulp_adm	2.4.1.58	5.26564e-07	3.78269e-08
food_porridge_pulp_adm	3.2.1.35	9.73523e-08	2.20243e-08
food_porridge_pulp_adm	3.2.1.170	1.18301e-07	7.17211e-08
food_porridge_pulp_adm	3.2.1.11	3.98794e-06	2.3141e-07
food_porridge_pulp_adm	2.4.1.227	9.25354e-05	6.08385e-06
food_porridge_pulp_adm	3.2.1.4	0.000180477	7.421e-06
food_porridge_pulp_adm	3.2.1.24	1.87622e-05	1.40996e-06
food_porridge_pulp_adm	3.2.1.52	3.01342e-05	4.41426e-06
food_porridge_pulp_adm	3.2.1.99	5.39975e-05	3.32121e-06
food_porridge_pulp_adm	5.1.3.15	1.3341e-07	2.45612e-07
food_porridge_pulp_adm	3.2.1.172	3.94747e-06	8.81639e-08
food_porridge_pulp_adm	3.2.1.176	1.31469e-08	1.03596e-08
food_porridge_pulp_adm	2.4.1.349	5.09363e-07	7.8432e-09
food_porridge_pulp_adm	2.4.1.337	1.05417e-05	9.05927e-07
food_porridge_pulp_adm	3.2.1.135	7.60271e-05	5.167e-06
food_porridge_pulp_adm	3.4.24.3	2.00774e-06	6.14786e-07
food_porridge_pulp_adm	5.4.99.16	2.43125e-05	1.5367e-06
food_porridge_pulp_adm	3.2.1.133	7.19989e-05	5.09846e-06
food_porridge_pulp_adm	3.2.1.1	0.000160616	8.04243e-06
food_porridge_pulp_adm	3.2.1.96	3.64944e-06	4.73279e-07
food_porridge_pulp_adm	2.7.8.12	5.84777e-06	4.54605e-07
food_porridge_pulp_adm	3.1.1.53	2.1692e-05	2.48658e-06
food_porridge_pulp_adm	2.4.1.64	4.01766e-07	8.47476e-08
food_porridge_pulp_adm	2.4.99.13	3.63336e-05	3.761e-06
food_porridge_pulp_adm	2.7.8.20	3.41887e-06	8.32556e-07
food_porridge_pulp_adm	2.4.1.83	5.14573e-05	2.37325e-06
food_porridge_pulp_adm	2.4.1.315	5.09793e-05	2.43796e-06
food_porridge_pulp_adm	3.5.1.28	4.12096e-06	5.26899e-07
food_porridge_pulp_adm	2.4.1.12	1.1753e-05	8.30039e-07
food_porridge_pulp_adm	3.2.1.86	5.95948e-05	7.00848e-06
food_porridge_pulp_adm	2.4.1.182	2.33307e-05	1.31761e-06
food_porridge_pulp_adm	2.4.1.293	5.19396e-06	1.00573e-07
food_porridge_pulp_adm	6.3.1.8	3.64944e-06	4.73279e-07
food_porridge_pulp_adm	2.4.1.212	0	3.22915e-07
food_porridge_pulp_adm	3.2.1.41	2.56395e-05	3.1953e-06
food_porridge_pulp_adm	2.4.99.14	3.63336e-05	3.761e-06
food_porridge_pulp_adm	3.4.21.72	1.64537e-10	5.73602e-10
food_porridge_pulp_adm	2.4.1.21	6.35132e-05	2.41403e-06
food_porridge_pulp_adm	2.4.1.18	8.49967e-05	4.78166e-06
food_porridge_pulp_adm	2.4.1.129	9.58391e-05	5.49066e-06
food_porridge_pulp_adm	3.5.4.33	4.15626e-05	2.37654e-06
food_porridge_pulp_adm	3.2.1.70	2.16897e-05	3.18888e-07
food_porridge_pulp_adm	3.2.1.10	7.87805e-05	2.2193e-06
food_porridge_pulp_adm	2.4.99.16	1.64537e-10	5.73602e-10
food_porridge_pulp_adm	3.2.1.55	9.19097e-05	5.84057e-06
food_porridge_pulp_adm	3.2.1.141	8.02606e-06	3.25354e-07
food_porridge_pulp_adm	3.2.1.180	4.11541e-06	7.40678e-07
food_porridge_pulp_adm	3.2.1.26	3.87225e-05	7.79991e-07
food_porridge_pulp_adm	3.2.1.54	7.19989e-05	5.09846e-06
food_porridge_pulp_adm	2.4.1.348	1.20701e-05	7.09206e-07
food_porridge_pulp_adm	2.4.1.9	1.97697e-06	4.41291e-08
food_porridge_pulp_adm	3.2.1.68	5.93941e-05	1.88133e-06
food_porridge_pulp_adm	2.4.1.288	5.40884e-06	1.79366e-07
food_porridge_pulp_adm	3.2.1.78	4.79266e-05	1.43406e-06
food_porridge_pulp_adm	6.2.1.30	2.03686e-06	7.3919e-08
food_porridge_pulp_adm	2.4.1.187	6.0531e-05	2.61665e-06
food_porridge_pulp_adm	2.4.1.11	1.10431e-05	1.99994e-06
food_porridge_pulp_adm	2.4.1.7	4.536e-05	1.4497e-06
food_porridge_pulp_adm	2.4.1.329	4.536e-05	1.4497e-06
food_porridge_pulp_adm	3.2.1.177	1.74174e-05	8.81865e-07
food_porridge_pulp_adm	2.4.2.53	5.45546e-06	2.32797e-07
food_porridge_pulp_adm	2.4.1.280	2.00734e-05	3.74178e-07
food_porridge_pulp_adm	2.4.1.20	1.39353e-05	2.99672e-07
food_porridge_pulp_adm	2.4.1.4	2.10466e-05	1.1326e-06
food_porridge_pulp_adm	3.4.16.4	9.58391e-05	5.49066e-06
food_porridge_pulp_adm	3.2.1.20	5.9058e-05	4.89013e-06
food_porridge_pulp_adm	2.4.1.8	0	3.07606e-08
food_porridge_pulp_adm	3.2.1.21	0.000122399	6.33913e-06
food_porridge_pulp_adm	3.5.1.78	3.64944e-06	4.73279e-07
food_porridge_pulp_adm	2.4.1.109	0	3.20081e-09
food_porridge_pulp_adm	3.4.17.14	3.64944e-06	4.73279e-07
food_porridge_pulp_adm	3.2.1.93	2.16897e-05	3.18888e-07
food_porridge_pulp_adm	2.4.1.279	6.90092e-06	8.61383e-07
food_porridge_pulp_adm	3.2.1.136	2.11483e-05	6.27617e-07
food_porridge_pulp_adm	2.3.1.204	1.18301e-07	7.17211e-08
food_porridge_pulp_adm	4.2.2.23	2.90735e-06	1.30764e-07
food_porridge_pulp_adm	3.2.1.18	5.38164e-05	1.79874e-06
food_porridge_pulp_adm	3.2.1.45	2.10413e-05	1.00797e-06
food_porridge_pulp_adm	2.4.99.12	3.63336e-05	3.761e-06
food_porridge_pulp_adm	2.4.1.173	5.2931e-07	1.97247e-07
food_porridge_pulp_adm	3.2.1.156	1.03087e-05	1.39812e-06
food_porridge_pulp_adm	3.2.1.97	4.6847e-06	4.30704e-07
food_porridge_pulp_adm	3.2.1.37	5.53833e-05	4.07534e-06
food_porridge_pulp_adm	3.2.1.23	1.21241e-08	8.10666e-08
food_formula_powder_milk_adm	2.4.1.25	4.4289e-07	1.93823e-07
food_formula_powder_milk_adm	3.2.1.10	5.07104e-10	5.57002e-10
food_formula_powder_milk_adm	3.2.1.172	1.35534e-10	3.04257e-10
food_formula_powder_milk_adm	3.2.1.21	2.58456e-05	1.1065e-06
food_formula_powder_milk_adm	3.2.1.55	3.09218e-09	1.13078e-07
food_formula_powder_milk_adm	3.2.1.135	5.37349e-08	3.68006e-08
food_formula_powder_milk_adm	5.4.99.16	6.24863e-06	1.09137e-06
food_formula_powder_milk_adm	2.4.1.1	0	0
food_formula_powder_milk_adm	3.2.1.1	1.61124e-05	1.65188e-06
food_formula_powder_milk_adm	2.4.1.152	1.68126e-06	0
food_formula_powder_milk_adm	3.2.1.51	1.04366e-05	3.95194e-08
food_formula_powder_milk_adm	2.4.1.348	1.27846e-06	1.04854e-08
food_formula_powder_milk_adm	3.2.1.14	1.02825e-07	5.89376e-09
food_formula_powder_milk_adm	3.2.1.68	4.05146e-06	3.87345e-07
food_formula_powder_milk_adm	2.4.1.65	1.68126e-06	0
food_formula_powder_milk_adm	3.2.1.78	3.63313e-06	6.28171e-09
food_formula_powder_milk_adm	2.4.1.187	1.33725e-05	1.50055e-07
food_formula_powder_milk_adm	2.4.1.7	1.86552e-06	1.31077e-08
food_formula_powder_milk_adm	3.2.1.86	5.85134e-06	4.25725e-07
food_formula_powder_milk_adm	2.4.1.329	4.3195e-07	1.25369e-09
food_formula_powder_milk_adm	2.4.1.44	2.7259e-07	9.43798e-08
food_formula_powder_milk_adm	2.4.1.293	4.88754e-06	6.76002e-07
food_formula_powder_milk_adm	3.2.1.177	9.91996e-06	1.09502e-08
food_formula_powder_milk_adm	3.2.1.40	1.55766e-05	2.73873e-09
food_formula_powder_milk_adm	3.2.1.11	4.69992e-06	3.55246e-07
food_formula_powder_milk_adm	3.2.1.41	8.6326e-06	3.98671e-07
food_formula_powder_milk_adm	2.4.1.227	1.07417e-08	0
food_formula_powder_milk_adm	3.2.1.97	1.55766e-05	2.73873e-09
food_formula_powder_milk_adm	2.4.1.21	0	5.88e-09
food_formula_powder_milk_adm	3.2.1.37	3.09218e-09	1.13078e-07
food_formula_powder_milk_adm	2.4.1.4	6.24863e-06	1.09137e-06
food_formula_powder_milk_adm	3.4.16.4	4.95638e-06	1.73253e-07
food_formula_powder_milk_adm	3.2.1.52	2.20923e-06	1.10444e-08
food_formula_powder_milk_adm	3.2.1.20	6.24863e-06	1.09137e-06
food_formula_powder_milk_adm	2.4.1.129	4.95638e-06	1.73253e-07
food_formula_powder_milk_adm	3.2.1.23	2.43376e-07	8.42751e-10
food_animal_milk_adm	2.4.1.25	4.75778e-06	4.2356e-07
food_animal_milk_adm	3.2.1.10	9.58757e-07	6.47063e-08
food_animal_milk_adm	2.4.1.226	1.9006e-06	3.6859e-07
food_animal_milk_adm	3.2.1.172	2.58207e-06	2.88582e-07
food_animal_milk_adm	3.2.1.21	8.95514e-05	2.41069e-07
food_animal_milk_adm	3.2.1.55	4.75916e-05	2.64354e-07
food_animal_milk_adm	2.4.1.337	2.11821e-07	6.42239e-08
food_animal_milk_adm	3.2.1.99	4.61692e-05	1.69196e-06
food_animal_milk_adm	3.2.1.135	3.21415e-05	1.89107e-06
food_animal_milk_adm	2.4.1.291	6.09535e-07	2.11336e-08
food_animal_milk_adm	5.4.99.16	1.11685e-06	7.05354e-08
food_animal_milk_adm	3.2.1.133	3.21415e-05	1.89107e-06
food_animal_milk_adm	2.4.1.1	5.12523e-07	3.05977e-08
food_animal_milk_adm	3.2.1.1	8.4219e-05	1.00192e-06
food_animal_milk_adm	2.4.99.15	2.80252e-06	2.98413e-07
food_animal_milk_adm	3.2.1.93	1.05285e-05	5.17204e-07
food_animal_milk_adm	3.2.1.26	5.11618e-05	1.5844e-06
food_animal_milk_adm	3.2.1.51	1.5172e-05	2.51693e-07
food_animal_milk_adm	2.7.8.12	2.60177e-06	3.13221e-07
food_animal_milk_adm	3.1.1.11	3.35483e-08	3.00105e-08
food_animal_milk_adm	3.2.1.54	3.21415e-05	1.89107e-06
food_animal_milk_adm	2.4.1.10	3.93872e-06	1.60338e-06
food_animal_milk_adm	2.3.1.204	3.90286e-07	1.03591e-07
food_animal_milk_adm	2.4.1.348	2.36622e-05	2.70207e-07
food_animal_milk_adm	2.4.99.13	2.80252e-06	2.98413e-07
food_animal_milk_adm	3.2.1.82	3.35483e-08	3.00105e-08
food_animal_milk_adm	2.4.1.338	5.92977e-07	3.72082e-08
food_animal_milk_adm	2.4.1.83	0	3.05608e-07
food_animal_milk_adm	3.2.1.14	6.96342e-08	1.25671e-11
food_animal_milk_adm	2.4.1.9	3.93872e-06	1.60338e-06
food_animal_milk_adm	3.2.1.68	8.60425e-07	3.95594e-08
food_animal_milk_adm	3.2.1.46	8.292e-07	1.49981e-07
food_animal_milk_adm	2.4.1.315	4.10662e-07	7.78028e-08
food_animal_milk_adm	2.4.1.187	3.80801e-05	3.24652e-07
food_animal_milk_adm	3.5.1.28	5.95865e-06	1.4675e-07
food_animal_milk_adm	2.4.1.11	4.13357e-08	2.19867e-08
food_animal_milk_adm	2.4.1.230	1.16364e-06	6.01819e-08
food_animal_milk_adm	3.2.1.18	3.68362e-05	8.10068e-07
food_animal_milk_adm	2.4.1.12	2.73258e-07	6.91025e-08
food_animal_milk_adm	3.2.1.170	7.93165e-07	1.91009e-07
food_animal_milk_adm	3.2.1.35	1.40118e-05	4.46502e-09
food_animal_milk_adm	3.2.1.45	1.00754e-06	1.71597e-07
food_animal_milk_adm	2.4.1.182	6.23154e-06	8.06127e-07
food_animal_milk_adm	3.2.1.86	2.09634e-05	8.01462e-07
food_animal_milk_adm	2.4.1.293	2.4493e-06	5.54361e-08
food_animal_milk_adm	3.2.1.177	1.11133e-05	6.73907e-06
food_animal_milk_adm	2.4.99.12	2.80252e-06	2.98413e-07
food_animal_milk_adm	3.2.1.3	2.10056e-06	2.66144e-08
food_animal_milk_adm	3.2.1.11	1.24597e-06	1.50825e-07
food_animal_milk_adm	3.2.1.70	9.58757e-07	6.47063e-08
food_animal_milk_adm	2.4.1.208	2.46912e-07	7.49436e-08
food_animal_milk_adm	3.2.1.41	1.14473e-06	6.06871e-08
food_animal_milk_adm	2.4.1.227	1.87834e-06	2.59389e-07
food_animal_milk_adm	2.4.99.14	2.80252e-06	2.98413e-07
food_animal_milk_adm	3.1.4.3	3.35483e-08	3.00105e-08
food_animal_milk_adm	3.2.1.156	3.18864e-06	8.89408e-07
food_animal_milk_adm	3.2.1.97	1.42834e-05	7.79137e-08
food_animal_milk_adm	3.2.1.4	4.72302e-07	1.13181e-08
food_animal_milk_adm	3.2.1.24	3.90286e-07	1.03591e-07
food_animal_milk_adm	3.2.1.37	3.57934e-06	2.45891e-07
food_animal_milk_adm	2.4.1.4	1.11685e-06	7.05354e-08
food_animal_milk_adm	3.4.16.4	1.02208e-05	1.24547e-06
food_animal_milk_adm	2.4.1.250	2.26912e-05	1.36098e-07
food_animal_milk_adm	2.4.1.18	4.91239e-06	4.29993e-07
food_animal_milk_adm	3.2.1.20	5.47543e-06	1.24326e-06
food_animal_milk_adm	3.2.1.52	1.49077e-06	1.70296e-07
food_animal_milk_adm	2.4.1.129	1.1195e-05	1.30727e-06
food_animal_milk_adm	3.2.1.23	1.40118e-05	4.46502e-09
food_animal_milk_adm	3.5.4.33	3.11712e-05	1.76505e-06
food_animal_milk_adm	2.4.1.175	1.9006e-06	3.6859e-07
food_pure_honey_adm	2.4.1.25	2.16556e-05	6.5709e-07
food_pure_honey_adm	3.2.1.1	1.53706e-06	1.85529e-07
food_pure_honey_adm	3.2.1.41	1.53706e-06	1.85529e-07
food_pure_honey_adm	3.2.1.51	7.15467e-07	1.05356e-06
food_pure_honey_adm	4.2.2.5	8.19874e-08	1.18123e-08
food_pure_honey_adm	2.4.1.291	1.35394e-06	3.39933e-08
food_tea_adm	2.4.1.8	1.35589e-05	5.93446e-07
food_tea_adm	3.2.1.21	1.44559e-07	4.37173e-08
food_tea_adm	2.4.1.349	4.92292e-07	2.37017e-08
food_tea_adm	3.2.1.55	8.1057e-07	1.19715e-08
food_tea_adm	3.2.1.99	1.05373e-07	1.05154e-08
food_tea_adm	3.2.1.135	3.92759e-08	3.61766e-09
food_tea_adm	2.4.1.304	6.09515e-07	1.92414e-09
food_tea_adm	3.2.1.133	3.92759e-08	3.61766e-09
food_tea_adm	2.4.1.308	7.40989e-06	1.48422e-07
food_tea_adm	2.4.1.1	3.75913e-06	1.32681e-06
food_tea_adm	2.4.1.339	8.70694e-07	1.32678e-08
food_tea_adm	3.2.1.1	3.93792e-07	1.68349e-08
food_tea_adm	2.4.99.15	5.33299e-07	4.63913e-09
food_tea_adm	3.2.1.26	2.66576e-06	8.82132e-07
food_tea_adm	3.2.1.136	6.31218e-06	1.12147e-07
food_tea_adm	3.2.1.54	3.92759e-08	3.61766e-09
food_tea_adm	2.4.1.64	1.23118e-05	5.45484e-07
food_tea_adm	2.4.99.13	5.33299e-07	4.63913e-09
food_tea_adm	2.4.1.340	8.70694e-07	1.32678e-08
food_tea_adm	2.4.1.83	3.27058e-06	6.66983e-09
food_tea_adm	2.4.1.187	6.58455e-07	9.7902e-09
food_tea_adm	2.4.1.11	2.25505e-06	5.46255e-08
food_tea_adm	3.2.1.86	1.09706e-07	3.08673e-08
food_tea_adm	3.2.1.45	8.73667e-07	1.32909e-08
food_tea_adm	2.4.1.182	7.03305e-08	4.87131e-08
food_tea_adm	2.4.1.212	5.04044e-07	4.37376e-10
food_tea_adm	2.4.99.12	5.33299e-07	4.63913e-09
food_tea_adm	5.1.3.2	2.56206e-06	2.35882e-09
food_tea_adm	3.2.1.41	8.78844e-08	1.56819e-08
food_tea_adm	2.4.1.227	1.15329e-06	2.4836e-08
food_tea_adm	2.4.99.14	5.33299e-07	4.63913e-09
food_tea_adm	3.2.1.97	7.21825e-07	5.70729e-08
food_tea_adm	3.2.1.4	5.02326e-07	2.99512e-09
food_tea_adm	2.4.1.21	1.46921e-06	2.10156e-08
food_tea_adm	3.2.1.37	8.1057e-07	1.19715e-08
food_tea_adm	3.4.16.4	5.4788e-06	8.55354e-08
food_tea_adm	3.2.1.52	1.35937e-05	1.8868e-07
food_tea_adm	3.2.1.185	1.28513e-09	3.04868e-10
food_tea_adm	3.2.1.20	1.03085e-06	2.10293e-08
food_tea_adm	2.4.1.129	6.6671e-06	1.12682e-07
food_tea_adm	3.2.1.23	7.21825e-07	5.70729e-08
food_sugar_water_adm	3.2.1.10	4.79299e-07	1.94464e-08
food_sugar_water_adm	3.2.1.21	6.02093e-09	1.77398e-09
food_sugar_water_adm	2.4.1.291	1.05297e-09	3.20131e-09
food_sugar_water_adm	2.4.1.1	3.10013e-09	7.32444e-12
food_sugar_water_adm	3.2.1.1	1.67718e-07	0
food_sugar_water_adm	3.2.1.122	1.08884e-06	2.33463e-08
food_sugar_water_adm	3.2.1.26	5.07319e-07	2.09179e-08
food_sugar_water_adm	3.2.1.51	3.90764e-07	0
food_sugar_water_adm	3.1.1.53	1.81902e-08	3.05331e-10
food_sugar_water_adm	3.5.1.28	8.67764e-06	1.17226e-07
food_sugar_water_adm	3.2.1.86	1.08884e-06	2.33463e-08
food_sugar_water_adm	3.2.1.45	3.43311e-07	0
food_sugar_water_adm	2.4.1.180	3.27644e-06	5.67851e-07
food_sugar_water_adm	3.2.1.177	3.00829e-07	2.66258e-09
food_sugar_water_adm	3.2.1.40	3.69877e-06	0
food_sugar_water_adm	2.4.1.227	6.34569e-08	2.17233e-08
food_sugar_water_adm	3.2.1.97	3.69877e-06	0
food_sugar_water_adm	3.2.1.4	1.81902e-08	3.05331e-10
food_sugar_water_adm	3.2.1.24	1.18561e-07	3.58616e-08
food_sugar_water_adm	2.4.1.21	0	7.62392e-11
food_sugar_water_adm	3.2.1.99	5.83189e-07	1.13475e-08
food_gutthi_gripe_adm	2.4.1.25	7.218e-07	2.37211e-07
food_gutthi_gripe_adm	3.2.1.10	4.42307e-07	4.7615e-08
food_gutthi_gripe_adm	3.2.1.172	1.83053e-06	2.09152e-07
food_gutthi_gripe_adm	3.2.1.21	5.39018e-05	4.03821e-07
food_gutthi_gripe_adm	2.4.1.346	2.7818e-06	6.17662e-11
food_gutthi_gripe_adm	2.4.1.337	2.05212e-05	3.04071e-08
food_gutthi_gripe_adm	3.2.1.8	5.0326e-09	1.90799e-09
food_gutthi_gripe_adm	4.2.2.5	7.98138e-06	3.74001e-08
food_gutthi_gripe_adm	2.4.1.109	0	6.61169e-07
food_gutthi_gripe_adm	3.2.1.135	4.91912e-06	1.57435e-08
food_gutthi_gripe_adm	5.4.99.16	0	6.70837e-07
food_gutthi_gripe_adm	3.2.1.133	2.89634e-06	1.33953e-08
food_gutthi_gripe_adm	2.4.2.26	4.52643e-06	6.22075e-09
food_gutthi_gripe_adm	2.4.1.1	1.48355e-05	2.11539e-06
food_gutthi_gripe_adm	3.2.1.1	1.55382e-05	9.38255e-07
food_gutthi_gripe_adm	2.4.99.15	7.51182e-06	3.67719e-07
food_gutthi_gripe_adm	3.2.1.93	2.99676e-05	3.18463e-07
food_gutthi_gripe_adm	3.2.1.122	9.00594e-06	8.23134e-07
food_gutthi_gripe_adm	3.2.1.26	1.5748e-06	5.2656e-08
food_gutthi_gripe_adm	3.2.1.51	7.0552e-05	7.73448e-07
food_gutthi_gripe_adm	2.7.8.12	1.6952e-06	3.06307e-08
food_gutthi_gripe_adm	3.2.1.54	2.89634e-06	1.33953e-08
food_gutthi_gripe_adm	2.4.1.348	1.04849e-06	2.96124e-09
food_gutthi_gripe_adm	2.4.99.13	7.51182e-06	3.67719e-07
food_gutthi_gripe_adm	2.4.1.52	5.58042e-05	5.68617e-08
food_gutthi_gripe_adm	2.4.1.303	1.88038e-05	3.9015e-07
food_gutthi_gripe_adm	2.4.1.83	6.72311e-06	5.92945e-07
food_gutthi_gripe_adm	3.2.1.14	3.11046e-05	4.93776e-09
food_gutthi_gripe_adm	2.4.1.288	0	6.37674e-07
food_gutthi_gripe_adm	3.2.1.78	5.0326e-09	1.90799e-09
food_gutthi_gripe_adm	2.4.1.187	4.00352e-05	6.58906e-07
food_gutthi_gripe_adm	3.5.1.28	0.000106974	6.36948e-07
food_gutthi_gripe_adm	2.4.1.11	2.579e-08	2.09595e-08
food_gutthi_gripe_adm	3.2.1.18	2.64702e-05	1.68971e-06
food_gutthi_gripe_adm	2.4.1.12	3.08508e-05	3.16467e-08
food_gutthi_gripe_adm	3.2.1.170	2.24407e-05	4.98266e-10
food_gutthi_gripe_adm	3.2.1.45	1.29103e-07	1.38784e-08
food_gutthi_gripe_adm	3.2.1.86	0.000150007	1.85484e-06
food_gutthi_gripe_adm	2.4.1.182	6.31669e-06	4.63399e-07
food_gutthi_gripe_adm	2.4.1.180	8.87342e-06	1.4524e-06
food_gutthi_gripe_adm	3.2.1.177	2.66606e-05	2.56012e-08
food_gutthi_gripe_adm	5.4.99.15	1.1309e-06	2.51215e-07
food_gutthi_gripe_adm	2.4.99.12	7.51182e-06	3.67719e-07
food_gutthi_gripe_adm	2.4.1.122	1.48339e-05	3.89516e-07
food_gutthi_gripe_adm	3.2.1.11	5.0326e-09	1.90799e-09
food_gutthi_gripe_adm	2.4.1.208	1.92673e-05	3.01332e-08
food_gutthi_gripe_adm	3.2.1.41	1.4366e-06	8.93171e-07
food_gutthi_gripe_adm	3.2.1.80	5.0326e-09	1.90799e-09
food_gutthi_gripe_adm	2.4.1.227	3.02474e-05	6.69852e-07
food_gutthi_gripe_adm	2.4.99.14	7.51182e-06	3.67719e-07
food_gutthi_gripe_adm	3.2.1.97	3.94561e-06	6.13283e-08
food_gutthi_gripe_adm	2.1.1.72	4.79537e-06	2.0805e-08
food_gutthi_gripe_adm	3.2.1.4	4.00109e-07	2.02483e-08
food_gutthi_gripe_adm	2.7.13.3	1.26975e-08	3.79575e-10
food_gutthi_gripe_adm	2.4.1.21	6.17551e-06	7.64824e-07
food_gutthi_gripe_adm	1.14.99.53	2.02144e-05	2.13082e-08
food_gutthi_gripe_adm	2.4.1.4	0	6.70837e-07
food_gutthi_gripe_adm	3.4.16.4	5.0001e-05	7.17088e-07
food_gutthi_gripe_adm	3.2.1.52	6.29426e-05	1.19862e-06
food_gutthi_gripe_adm	2.4.1.18	5.60865e-06	7.63959e-07
food_gutthi_gripe_adm	3.2.1.20	2.4692e-05	7.07935e-07
food_gutthi_gripe_adm	3.2.1.89	5.0326e-09	1.90799e-09
food_gutthi_gripe_adm	2.4.1.129	5.07336e-05	8.83241e-07
food_gutthi_gripe_adm	3.2.1.99	1.7141e-05	5.24145e-07
